# Supplementary material
Source: PubMed Central journal article supplement (PMC4718825)
Supplement: NIHMS708021-supplement-Supp_FigureS1___TableS1-S8.pdf [file NIHMS708021-supplement-Supp_FigureS1___TableS1-S8.pdf]

## SUPPLEMENTARY MATERIALS

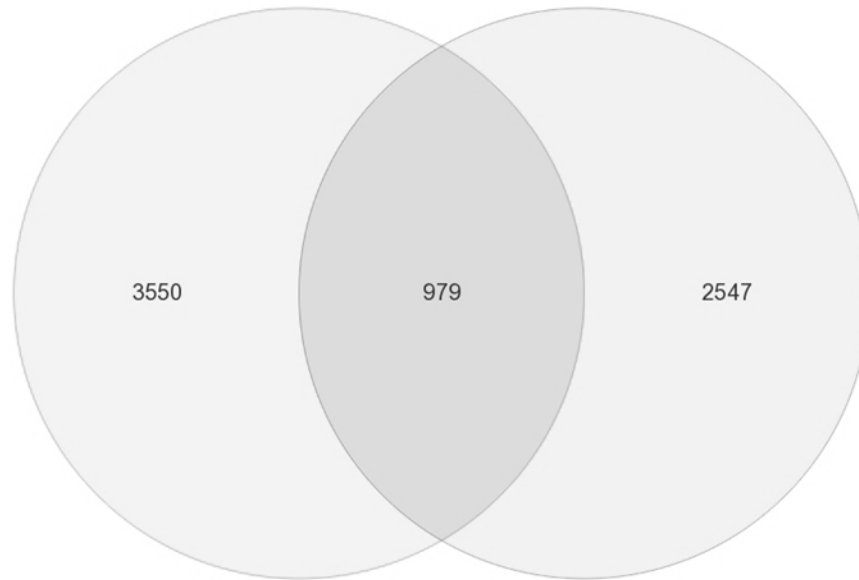

Healthy Controls vs. Tolerant Unique (years 5 & 6) (4529) Healthy Controls vs. Tolerant Unique (years 3 & 4) (3526)

**Figure S1.** Venn diagram showing the overlap of 3526 and 4529 genes that are unique to Tol subjects at years 3 + 4 and 5 + 6 post-transplant, Differential expression of 979 genes is shared at both times.

**Supplementary Table S2: 1 Year Tolerant vs. 1 Year Non-Tolerant (p<0.005)**

| Probeset ID     | Gene Symbol | Gene Title                                                                             | p-value (1 Year Tolerant vs. 1 Year Non-Tolerant) | Fold-Change(1 Year Tolerant vs. 1 Year Non-Tolerant) | Fold-Change(1 Year Tolerant vs. 1 Year Non-Tolerant) (Description) |
|-----------------|-------------|----------------------------------------------------------------------------------------|---------------------------------------------------|------------------------------------------------------|--------------------------------------------------------------------|
| 242043_PM_s_at  | EST1        | EST1                                                                                   | 2.80E-06                                          | 1.57                                                 | 1 Year Tolerant up vs 1 Year Non-Tolerant                          |
| 234644_PM_x_at  | TNFRSF10C   | Tumor necrosis factor receptor superfamily, member 10c, decoy without an intracellular | 8.77E-06                                          | 1.87                                                 | 1 Year Tolerant up vs 1 Year Non-Tolerant                          |
| 203788_PM_s_at  | SEMA3C      | sema domain, immunoglobulin domain (Ig), short basic domain, secreted, (semaphorin) 3C | 5.27E-05                                          | 1.48                                                 | 1 Year Tolerant up vs 1 Year Non-Tolerant                          |
| 1553542_PM_at   | CCDC125     | coiled-coil domain containing 125                                                      | 8.29E-05                                          | 1.53                                                 | 1 Year Tolerant up vs 1 Year Non-Tolerant                          |
| 215717_PM_s_at  | FBN2        | fibrillin 2                                                                            | 0.00012                                           | 1.58                                                 | 1 Year Tolerant up vs 1 Year Non-Tolerant                          |
| 243074_PM_at    | EST2        | EST2                                                                                   | 0.00013                                           | 1.50                                                 | 1 Year Tolerant up vs 1 Year Non-Tolerant                          |
| 242010_PM_at    | LOC728475   | Hypothetical LOC728475                                                                 | 0.00014                                           | -1.40                                                | 1 Year Tolerant down vs 1 Year Non-Tolerant                        |
| 200773_PM_x_at  | PTMA        | prothymosin, alpha                                                                     | 0.00018                                           | -1.12                                                | 1 Year Tolerant down vs 1 Year Non-Tolerant                        |
| 212348_PM_s_at  | KDM1A       | lysine (K)-specific demethylase 1A                                                     | 0.00021                                           | -1.48                                                | 1 Year Tolerant down vs 1 Year Non-Tolerant                        |
| 236479_PM_at    | EST3        | EST3                                                                                   | 0.00023                                           | 1.36                                                 | 1 Year Tolerant up vs 1 Year Non-Tolerant                          |
| 210579_PM_s_at  | TRIM10      | tripartite motif-containing 10                                                         | 0.00033                                           | 1.43                                                 | 1 Year Tolerant up vs 1 Year Non-Tolerant                          |
| 244787_PM_at    | EST4        | EST4                                                                                   | 0.00033                                           | 2.28                                                 | 1 Year Tolerant up vs 1 Year Non-Tolerant                          |
| 235823_PM_at    | EST5        | EST5                                                                                   | 0.00040                                           | 1.71                                                 | 1 Year Tolerant up vs 1 Year Non-Tolerant                          |
| 221006_PM_s_at  | SNX27       | sorting nexin family member 27                                                         | 0.00044                                           | 1.58                                                 | 1 Year Tolerant up vs 1 Year Non-Tolerant                          |
| 243697_PM_at    | MOXD1       | monooxygenase, DBH-like 1                                                              | 0.00051                                           | 1.35                                                 | 1 Year Tolerant up vs 1 Year Non-Tolerant                          |
| 202899_PM_s_at  | SRSF3       | serine/arginine-rich splicing factor 3                                                 | 0.00054                                           | -1.41                                                | 1 Year Tolerant down vs 1 Year Non-Tolerant                        |
| 205015_PM_s_at  | TGFA        | transforming growth factor, alpha                                                      | 0.00059                                           | 1.30                                                 | 1 Year Tolerant up vs 1 Year Non-Tolerant                          |
| 1554539_PM_a_at | RHOF        | ras homolog gene family, member F (in filopodia)                                       | 0.00070                                           | -1.83                                                | 1 Year Tolerant down vs 1 Year Non-Tolerant                        |
| 227106_PM_at    | LOC440104   | 1110012D08Rik pseudogene                                                               | 0.00070                                           | -1.52                                                | 1 Year Tolerant down vs 1 Year Non-Tolerant                        |
| 208609_PM_s_at  | TNXB        | tenascin XB                                                                            | 0.00071                                           | 1.36                                                 | 1 Year Tolerant up vs 1 Year Non-Tolerant                          |
| 244456_PM_at    | EST6        | EST6                                                                                   | 0.00072                                           | 1.37                                                 | 1 Year Tolerant up vs 1 Year Non-Tolerant                          |
| 205555_PM_s_at  | MSX2        | msh homeobox 2                                                                         | 0.00072                                           | 1.37                                                 | 1 Year Tolerant up vs 1 Year Non-Tolerant                          |
| 214174_PM_s_at  | PDLIM4      | PDZ and LIM domain 4                                                                   | 0.00083                                           | 1.58                                                 | 1 Year Tolerant up vs 1 Year Non-Tolerant                          |
| 227707_PM_at    | MYLIP       | Myosin regulatory light chain interacting protein                                      | 0.00089                                           | 1.52                                                 | 1 Year Tolerant up vs 1 Year Non-Tolerant                          |
| 241316_PM_at    | EST7        | EST7                                                                                   | 0.00090                                           | 1.45                                                 | 1 Year Tolerant up vs 1 Year Non-Tolerant                          |
| 217607_PM_x_at  | EIF4G2      | eukaryotic translation initiation factor 4 gamma, 2                                    | 0.00094                                           | 1.43                                                 | 1 Year Tolerant up vs 1 Year Non-Tolerant                          |
| 228074_PM_at    | ITPRIPL2    | inositol 1,4,5-triphosphate receptor interacting protein-like 2                        | 0.00094                                           | 1.46                                                 | 1 Year Tolerant up vs 1 Year Non-Tolerant                          |
| 224192_PM_at    | FCRL2       | Fc receptor-like 2                                                                     | 0.00099                                           | -1.56                                                | 1 Year Tolerant down vs 1 Year Non-Tolerant                        |
| 227922_PM_x_at  | LOC441124   | Hypothetical gene supported by AK093729; BX647918                                      | 0.00099                                           | -1.68                                                | 1 Year Tolerant down vs 1 Year Non-Tolerant                        |

|                 |                                  |                                                                                     |         |       |                                             |
|-----------------|----------------------------------|-------------------------------------------------------------------------------------|---------|-------|---------------------------------------------|
| 213705_PM_at    | LOC100509558 ///<br>LOC100510047 | hypothetical LOC100509558 /// hypothetical<br>LOC100510047                          | 0.00105 | 1.64  | 1 Year Tolerant up vs 1 Year Non-Tolerant   |
| 215415_PM_s_at  | LYST                             | lysosomal trafficking regulator                                                     | 0.00115 | 2.00  | 1 Year Tolerant up vs 1 Year Non-Tolerant   |
| 226744_PM_at    | METT10D                          | methyltransferase 10 domain containing                                              | 0.00117 | -1.48 | 1 Year Tolerant down vs 1 Year Non-Tolerant |
| 224931_PM_at    | SLC41A3                          | solute carrier family 41, member 3                                                  | 0.00118 | -1.55 | 1 Year Tolerant down vs 1 Year Non-Tolerant |
| 1553483_PM_at   | TSGA10IP                         | testis specific, 10 interacting protein                                             | 0.00119 | -1.34 | 1 Year Tolerant down vs 1 Year Non-Tolerant |
| 1555904_PM_at   | EST8                             | EST8                                                                                | 0.00123 | 1.56  | 1 Year Tolerant up vs 1 Year Non-Tolerant   |
| 1555423_PM_at   | SSH2                             | slingshot homolog 2 (Drosophila)                                                    | 0.00130 | 1.34  | 1 Year Tolerant up vs 1 Year Non-Tolerant   |
| 201523_PM_x_at  | UBE2N                            | ubiquitin-conjugating enzyme E2N (UBC13 homolog,<br>yeast)                          | 0.00132 | -1.63 | 1 Year Tolerant down vs 1 Year Non-Tolerant |
| 236392_PM_at    | CUL9                             | cullin 9                                                                            | 0.00133 | 1.30  | 1 Year Tolerant up vs 1 Year Non-Tolerant   |
| 230208_PM_at    | HCN4                             | hyperpolarization activated cyclic nucleotide-gated<br>potassium channel 4          | 0.00140 | 1.32  | 1 Year Tolerant up vs 1 Year Non-Tolerant   |
| 207124_PM_s_at  | GNB5                             | guanine nucleotide binding protein (G protein), beta 5                              | 0.00144 | -2.36 | 1 Year Tolerant down vs 1 Year Non-Tolerant |
| 229645_PM_at    | FAM69C                           | family with sequence similarity 69, member C                                        | 0.00153 | -1.42 | 1 Year Tolerant down vs 1 Year Non-Tolerant |
| 215961_PM_at    | F12                              | coagulation factor XII (Hageman factor)                                             | 0.00158 | 1.45  | 1 Year Tolerant up vs 1 Year Non-Tolerant   |
| 1553815_PM_a_at | TCEANC                           | transcription elongation factor A (SII) N-terminal and<br>central domain containing | 0.00162 | 1.36  | 1 Year Tolerant up vs 1 Year Non-Tolerant   |
| 1566869_PM_at   | EST9                             | EST9                                                                                | 0.00162 | 1.29  | 1 Year Tolerant up vs 1 Year Non-Tolerant   |
| 234373_PM_x_at  | EST10                            | EST10                                                                               | 0.00162 | 1.36  | 1 Year Tolerant up vs 1 Year Non-Tolerant   |
| 211941_PM_s_at  | PEBP1                            | phosphatidylethanolamine binding protein 1                                          | 0.00164 | -1.49 | 1 Year Tolerant down vs 1 Year Non-Tolerant |
| 239152_PM_at    | EST11                            | EST11                                                                               | 0.00165 | 1.55  | 1 Year Tolerant up vs 1 Year Non-Tolerant   |
| 217023_PM_x_at  | TPSAB1                           | tryptase alpha/beta 1                                                               | 0.00166 | -1.37 | 1 Year Tolerant down vs 1 Year Non-Tolerant |
| 239956_PM_at    | EST12                            | EST12                                                                               | 0.00170 | 2.00  | 1 Year Tolerant up vs 1 Year Non-Tolerant   |
| 230155_PM_x_at  | MSL1                             | Male-specific lethal 1 homolog (Drosophila)                                         | 0.00171 | 1.42  | 1 Year Tolerant up vs 1 Year Non-Tolerant   |
| 1553020_PM_at   | SMCR5                            | Smith-Magenis syndrome chromosome region,<br>candidate 5 (non-protein coding)       | 0.00174 | 1.30  | 1 Year Tolerant up vs 1 Year Non-Tolerant   |
| 209298_PM_s_at  | ITSN1                            | intersectin 1 (SH3 domain protein)                                                  | 0.00175 | 1.54  | 1 Year Tolerant up vs 1 Year Non-Tolerant   |
| 229185_PM_at    | LIFR                             | leukemia inhibitory factor receptor alpha                                           | 0.00177 | -1.27 | 1 Year Tolerant down vs 1 Year Non-Tolerant |
| 242300_PM_at    | EST13                            | EST13                                                                               | 0.00177 | 2.25  | 1 Year Tolerant up vs 1 Year Non-Tolerant   |
| 241922_PM_at    | LMO4                             | LIM domain only 4                                                                   | 0.00185 | 1.39  | 1 Year Tolerant up vs 1 Year Non-Tolerant   |
| 1560411_PM_at   | EST14                            | EST14                                                                               | 0.00193 | 1.29  | 1 Year Tolerant up vs 1 Year Non-Tolerant   |
| 1557415_PM_s_at | LETM2                            | leucine zipper-EF-hand containing transmembrane<br>protein 2                        | 0.00195 | -1.34 | 1 Year Tolerant down vs 1 Year Non-Tolerant |
| 216164_PM_at    | LRRN2                            | leucine rich repeat neuronal 2                                                      | 0.00196 | -1.37 | 1 Year Tolerant down vs 1 Year Non-Tolerant |
| 219222_PM_at    | RBKS                             | ribokinase                                                                          | 0.00201 | 1.37  | 1 Year Tolerant up vs 1 Year Non-Tolerant   |
| 230736_PM_at    | LOC387647                        | patched domain containing 3 pseudogene                                              | 0.00206 | 1.29  | 1 Year Tolerant up vs 1 Year Non-Tolerant   |

|                 |              |                                                                       |         |       |                                             |
|-----------------|--------------|-----------------------------------------------------------------------|---------|-------|---------------------------------------------|
| 1559474_PM_at   | SPEG         | SPEG complex locus                                                    | 0.00211 | 1.38  | 1 Year Tolerant up vs 1 Year Non-Tolerant   |
| 242281_PM_at    | GLUL         | glutamate-ammonia ligase                                              | 0.00211 | 1.70  | 1 Year Tolerant up vs 1 Year Non-Tolerant   |
| 240946_PM_at    | EST15        | EST15                                                                 | 0.00213 | 1.41  | 1 Year Tolerant up vs 1 Year Non-Tolerant   |
| 216277_PM_at    | BUB1         | budding uninhibited by benzimidazoles 1 homolog (yeast)               | 0.00214 | -1.52 | 1 Year Tolerant down vs 1 Year Non-Tolerant |
| 207127_PM_s_at  | HNRNPH3      | heterogeneous nuclear ribonucleoprotein H3 (2H9)                      | 0.00215 | -1.30 | 1 Year Tolerant down vs 1 Year Non-Tolerant |
| 1556172_PM_at   | EST16        | EST16                                                                 | 0.00215 | 1.49  | 1 Year Tolerant up vs 1 Year Non-Tolerant   |
| 207618_PM_s_at  | BCS1L        | BCS1-like ( <i>S. cerevisiae</i> )                                    | 0.00220 | -1.64 | 1 Year Tolerant down vs 1 Year Non-Tolerant |
| 215605_PM_at    | NCOA2        | Nuclear receptor coactivator 2                                        | 0.00220 | 1.89  | 1 Year Tolerant up vs 1 Year Non-Tolerant   |
| 231220_PM_at    | CELF4        | CUGBP, Elav-like family member 4                                      | 0.00223 | 1.29  | 1 Year Tolerant up vs 1 Year Non-Tolerant   |
| 213229_PM_at    | DICER1       | dicer 1, ribonuclease type III                                        | 0.00228 | 1.65  | 1 Year Tolerant up vs 1 Year Non-Tolerant   |
| 240409_PM_at    | SUGT1P3      | suppressor of G2 allele of SKP1 ( <i>S. cerevisiae</i> ) pseudogene 3 | 0.00231 | 1.28  | 1 Year Tolerant up vs 1 Year Non-Tolerant   |
| 221131_PM_at    | A4GNT        | alpha-1,4-N-acetylglucosaminyltransferase                             | 0.00232 | 1.26  | 1 Year Tolerant up vs 1 Year Non-Tolerant   |
| 214014_PM_at    | CDC42EP2     | CDC42 effector protein (Rho GTPase binding) 2                         | 0.00233 | 1.43  | 1 Year Tolerant up vs 1 Year Non-Tolerant   |
| 239327_PM_at    | EST17        | EST17                                                                 | 0.00233 | 1.49  | 1 Year Tolerant up vs 1 Year Non-Tolerant   |
| 237140_PM_x_at  | EST18        | EST18                                                                 | 0.00234 | 1.32  | 1 Year Tolerant up vs 1 Year Non-Tolerant   |
| 217000_PM_at    | EST19        | EST19                                                                 | 0.00238 | 1.37  | 1 Year Tolerant up vs 1 Year Non-Tolerant   |
| 209114_PM_at    | TSPAN1       | tetraspanin 1                                                         | 0.00238 | -1.43 | 1 Year Tolerant down vs 1 Year Non-Tolerant |
| 229949_PM_at    | LOC100507625 | hypothetical LOC100507625                                             | 0.00244 | -1.40 | 1 Year Tolerant down vs 1 Year Non-Tolerant |
| 1562094_PM_at   | EST20        | EST20                                                                 | 0.00247 | 1.57  | 1 Year Tolerant up vs 1 Year Non-Tolerant   |
| 213559_PM_s_at  | ZNF467       | Zinc finger protein 467                                               | 0.00257 | 1.27  | 1 Year Tolerant up vs 1 Year Non-Tolerant   |
| 1562747_PM_at   | EST21        | EST21                                                                 | 0.00258 | 1.25  | 1 Year Tolerant up vs 1 Year Non-Tolerant   |
| 225115_PM_at    | HIPK2        | homeodomain interacting protein kinase 2                              | 0.00258 | 1.55  | 1 Year Tolerant up vs 1 Year Non-Tolerant   |
| 1559035_PM_a_at | EST22        | EST22                                                                 | 0.00258 | 3.32  | 1 Year Tolerant up vs 1 Year Non-Tolerant   |
| 240690_PM_at    | EST23        | EST23                                                                 | 0.00261 | -1.90 | 1 Year Tolerant down vs 1 Year Non-Tolerant |
| 202123_PM_s_at  | ABL1         | c-abl oncogene 1, non-receptor tyrosine kinase                        | 0.00263 | -1.51 | 1 Year Tolerant down vs 1 Year Non-Tolerant |
| 205531_PM_s_at  | GLS2         | glutaminase 2 (liver, mitochondrial)                                  | 0.00263 | 1.35  | 1 Year Tolerant up vs 1 Year Non-Tolerant   |
| 240625_PM_at    | EST24        | EST24                                                                 | 0.00269 | 1.40  | 1 Year Tolerant up vs 1 Year Non-Tolerant   |
| 213176_PM_s_at  | LTBP4        | latent transforming growth factor beta binding protein 4              | 0.00273 | 1.38  | 1 Year Tolerant up vs 1 Year Non-Tolerant   |
| 208821_PM_at    | SNRPB        | small nuclear ribonucleoprotein polypeptides B and B1                 | 0.00277 | -1.41 | 1 Year Tolerant down vs 1 Year Non-Tolerant |
| 1554868_PM_s_at | PCNP         | PEST proteolytic signal containing nuclear protein                    | 0.00277 | -1.32 | 1 Year Tolerant down vs 1 Year Non-Tolerant |
| 225608_PM_at    | SNX29        | sorting nexin 29                                                      | 0.00279 | -1.50 | 1 Year Tolerant down vs 1 Year Non-Tolerant |
| 242248_PM_at    | PHKB         | phosphorylase kinase, beta                                            | 0.00281 | 2.00  | 1 Year Tolerant up vs 1 Year Non-Tolerant   |
| 237897_PM_at    | LOC100506357 | hypothetical LOC100506357                                             | 0.00288 | 1.40  | 1 Year Tolerant up vs 1 Year Non-Tolerant   |
| 1562863_PM_at   | EST25        | EST25                                                                 | 0.00299 | 1.53  | 1 Year Tolerant up vs 1 Year Non-Tolerant   |
| 201125_PM_s_at  | ITGB5        | integrin, beta 5                                                      | 0.00300 | -1.90 | 1 Year Tolerant down vs 1 Year Non-Tolerant |

|                     |                                                                                    |                                                                                            |         |       |                                             |
|---------------------|------------------------------------------------------------------------------------|--------------------------------------------------------------------------------------------|---------|-------|---------------------------------------------|
| 242168_PM_at        | NDUFS7                                                                             | NADH dehydrogenase (ubiquinone) Fe-S protein 7, 20kDa (NADH-coenzyme Q reductase)          | 0.00303 | 1.40  | 1 Year Tolerant up vs 1 Year Non-Tolerant   |
| 1566471_PM_at       | EST26                                                                              | EST26                                                                                      | 0.00304 | -1.35 | 1 Year Tolerant down vs 1 Year Non-Tolerant |
| 201524_PM_x_at      | UBE2N                                                                              | ubiquitin-conjugating enzyme E2N (UBC13 homolog, yeast)                                    | 0.00308 | -1.21 | 1 Year Tolerant down vs 1 Year Non-Tolerant |
| 215246_PM_at        | LARP7                                                                              | La ribonucleoprotein domain family, member 7                                               | 0.00308 | 1.74  | 1 Year Tolerant up vs 1 Year Non-Tolerant   |
| 235967_PM_at        | LOC100127891                                                                       | hypothetical LOC100127891                                                                  | 0.00311 | -1.42 | 1 Year Tolerant down vs 1 Year Non-Tolerant |
| 229576_PM_s_at      | TBX3                                                                               | T-box 3                                                                                    | 0.00312 | 1.32  | 1 Year Tolerant up vs 1 Year Non-Tolerant   |
| 217915_PM_s_at      | RSL24D1                                                                            | ribosomal L24 domain containing 1                                                          | 0.00313 | -1.37 | 1 Year Tolerant down vs 1 Year Non-Tolerant |
| 229179_PM_at        | RUFY1                                                                              | RUN and FYVE domain containing 1                                                           | 0.00314 | 1.25  | 1 Year Tolerant up vs 1 Year Non-Tolerant   |
| 206132_PM_at        | MCC                                                                                | mutated in colorectal cancers                                                              | 0.00314 | -1.28 | 1 Year Tolerant down vs 1 Year Non-Tolerant |
| 241086_PM_at        | EST27                                                                              | EST27                                                                                      | 0.00314 | 1.26  | 1 Year Tolerant up vs 1 Year Non-Tolerant   |
| 221423_PM_s_at      | YIPF5                                                                              | Yip1 domain family, member 5                                                               | 0.00316 | -2.02 | 1 Year Tolerant down vs 1 Year Non-Tolerant |
| 243341_PM_at        | EST28                                                                              | EST28                                                                                      | 0.00318 | 1.55  | 1 Year Tolerant up vs 1 Year Non-Tolerant   |
| AFFX-r2-Bs-phe-3_at | EST29                                                                              | EST29                                                                                      | 0.00323 | 3.30  | 1 Year Tolerant up vs 1 Year Non-Tolerant   |
| AFFX-ThrX-5_at      | EST30                                                                              | EST30                                                                                      | 0.00327 | 3.88  | 1 Year Tolerant up vs 1 Year Non-Tolerant   |
| 1561219_PM_x_at     | EST31                                                                              | EST31                                                                                      | 0.00333 | -1.36 | 1 Year Tolerant down vs 1 Year Non-Tolerant |
| 231716_PM_at        | RC3H2                                                                              | ring finger and CCCH-type domains 2                                                        | 0.00333 | 1.43  | 1 Year Tolerant up vs 1 Year Non-Tolerant   |
| 237875_PM_at        | EST32                                                                              | EST32                                                                                      | 0.00334 | 2.25  | 1 Year Tolerant up vs 1 Year Non-Tolerant   |
| 212766_PM_s_at      | ISG20L2                                                                            | interferon stimulated exonuclease gene 20kDa-like 2                                        | 0.00335 | -1.44 | 1 Year Tolerant down vs 1 Year Non-Tolerant |
| 223582_PM_at        | GPR98                                                                              | G protein-coupled receptor 98                                                              | 0.00336 | 1.30  | 1 Year Tolerant up vs 1 Year Non-Tolerant   |
| 1552834_PM_at       | B3GNT6                                                                             | UDP-GlcNAc:betaGal beta-1,3-N-acetylglucosaminyltransferase 6 (core 3 synthase)            | 0.00336 | -1.32 | 1 Year Tolerant down vs 1 Year Non-Tolerant |
| 219126_PM_at        | PHF10                                                                              | PHD finger protein 10                                                                      | 0.00345 | -1.31 | 1 Year Tolerant down vs 1 Year Non-Tolerant |
| 244257_PM_at        | EST33                                                                              | EST33                                                                                      | 0.00351 | 2.23  | 1 Year Tolerant up vs 1 Year Non-Tolerant   |
| 206708_PM_at        | FOXN2                                                                              | forkhead box N2                                                                            | 0.00351 | 1.49  | 1 Year Tolerant up vs 1 Year Non-Tolerant   |
| 201104_PM_x_at      | NBPF1 /// NBPF11<br>/// NBPF14 ///<br>NBPF15 ///<br>NBPF16 ///<br>NBPF24 /// NBPF8 | neuroblastoma breakpoint family, member 1 ///<br>neuroblastoma breakpoint family, member 1 | 0.00352 | -1.28 | 1 Year Tolerant down vs 1 Year Non-Tolerant |
| 239630_PM_at        | EST34                                                                              | EST34                                                                                      | 0.00354 | 2.13  | 1 Year Tolerant up vs 1 Year Non-Tolerant   |
| 237746_PM_at        | SFRS11                                                                             | Splicing factor, arginine/serine-rich 11                                                   | 0.00355 | 1.42  | 1 Year Tolerant up vs 1 Year Non-Tolerant   |
| 208184_PM_s_at      | TRAPPC10                                                                           | trafficking protein particle complex 10                                                    | 0.00355 | -1.38 | 1 Year Tolerant down vs 1 Year Non-Tolerant |
| 1556988_PM_s_at     | CHD1L                                                                              | chromodomain helicase DNA binding protein 1-like                                           | 0.00361 | -1.39 | 1 Year Tolerant down vs 1 Year Non-Tolerant |
| 1560926_PM_at       | EST35                                                                              | EST35                                                                                      | 0.00364 | 2.18  | 1 Year Tolerant up vs 1 Year Non-Tolerant   |
| 202143_PM_s_at      | COPS8                                                                              | COP9 constitutive photomorphogenic homolog subunit 8 (Arabidopsis)                         | 0.00365 | -1.49 | 1 Year Tolerant down vs 1 Year Non-Tolerant |

|                     |                                                   |                                                                               |         |       |                                             |
|---------------------|---------------------------------------------------|-------------------------------------------------------------------------------|---------|-------|---------------------------------------------|
| 201997_PM_s_at      | SPEN                                              | spen homolog, transcriptional regulator (Drosophila)                          | 0.00370 | -1.22 | 1 Year Tolerant down vs 1 Year Non-Tolerant |
| 1561449_PM_at       | EST36                                             | EST36                                                                         | 0.00370 | -1.31 | 1 Year Tolerant down vs 1 Year Non-Tolerant |
| 226597_PM_at        | REEP6                                             | receptor accessory protein 6                                                  | 0.00374 | -1.29 | 1 Year Tolerant down vs 1 Year Non-Tolerant |
| 221237_PM_s_at      | OSBP2                                             | oxysterol binding protein 2                                                   | 0.00379 | 1.55  | 1 Year Tolerant up vs 1 Year Non-Tolerant   |
| 222721_PM_at        | CNIH4                                             | cornichon homolog 4 (Drosophila)                                              | 0.00379 | 2.07  | 1 Year Tolerant up vs 1 Year Non-Tolerant   |
| 215412_PM_x_at      | PMS2L2                                            | postmeiotic segregation increased 2-like 2 pseudogene                         | 0.00389 | -1.42 | 1 Year Tolerant down vs 1 Year Non-Tolerant |
| 244200_PM_at        | EST37                                             | EST37                                                                         | 0.00389 | 1.44  | 1 Year Tolerant up vs 1 Year Non-Tolerant   |
| 215160_PM_x_at      | LOC100509419 ///<br>LOC100510581 ///<br>LOC642236 | protein FRG1B-like /// protein FRG1-like /// FSHD region<br>gene 1 pseudogene | 0.00408 | -1.39 | 1 Year Tolerant down vs 1 Year Non-Tolerant |
| 239508_PM_x_at      | CCDC108                                           | coiled-coil domain containing 108                                             | 0.00408 | 1.29  | 1 Year Tolerant up vs 1 Year Non-Tolerant   |
| 210978_PM_s_at      | TAGLN2                                            | transgelin 2                                                                  | 0.00413 | -1.63 | 1 Year Tolerant down vs 1 Year Non-Tolerant |
| 210823_PM_s_at      | PTPRS                                             | protein tyrosine phosphatase, receptor type, S                                | 0.00421 | 1.36  | 1 Year Tolerant up vs 1 Year Non-Tolerant   |
| 209445_PM_x_at      | C7orf44                                           | chromosome 7 open reading frame 44                                            | 0.00423 | -1.46 | 1 Year Tolerant down vs 1 Year Non-Tolerant |
| 1560563_PM_at       | EST38                                             | EST38                                                                         | 0.00425 | 1.27  | 1 Year Tolerant up vs 1 Year Non-Tolerant   |
| AFFX-LysX-5_at      | EST39                                             | EST39                                                                         | 0.00425 | 3.09  | 1 Year Tolerant up vs 1 Year Non-Tolerant   |
| 223423_PM_at        | GPR160                                            | G protein-coupled receptor 160                                                | 0.00426 | -1.82 | 1 Year Tolerant down vs 1 Year Non-Tolerant |
| 211510_PM_s_at      | CRHR2                                             | corticotropin releasing hormone receptor 2                                    | 0.00427 | 1.31  | 1 Year Tolerant up vs 1 Year Non-Tolerant   |
| 225048_PM_at        | PHF10                                             | PHD finger protein 10                                                         | 0.00429 | -1.74 | 1 Year Tolerant down vs 1 Year Non-Tolerant |
| 209475_PM_at        | USP15                                             | ubiquitin specific peptidase 15                                               | 0.00433 | 1.46  | 1 Year Tolerant up vs 1 Year Non-Tolerant   |
| 224547_PM_at        | EST40                                             | EST40                                                                         | 0.00433 | 1.32  | 1 Year Tolerant up vs 1 Year Non-Tolerant   |
| 230284_PM_at        | MYOM3                                             | myomesin family, member 3                                                     | 0.00435 | 1.29  | 1 Year Tolerant up vs 1 Year Non-Tolerant   |
| 1568748_PM_at       | LOC100508869                                      | hypothetical LOC100508869                                                     | 0.00437 | -1.36 | 1 Year Tolerant down vs 1 Year Non-Tolerant |
| 1555988_PM_a_at     | LOC126536                                         | hypothetical LOC126536                                                        | 0.00443 | 1.25  | 1 Year Tolerant up vs 1 Year Non-Tolerant   |
| 218418_PM_s_at      | KANK2                                             | KN motif and ankyrin repeat domains 2                                         | 0.00443 | 1.64  | 1 Year Tolerant up vs 1 Year Non-Tolerant   |
| 228416_PM_at        | ACVR2A                                            | activin A receptor, type IIA                                                  | 0.00447 | 1.89  | 1 Year Tolerant up vs 1 Year Non-Tolerant   |
| 230377_PM_s_at      | TBC1D2B                                           | TBC1 domain family, member 2B                                                 | 0.00448 | 1.24  | 1 Year Tolerant up vs 1 Year Non-Tolerant   |
| AFFX-LysX-M_at      | EST41                                             | EST41                                                                         | 0.00454 | 3.32  | 1 Year Tolerant up vs 1 Year Non-Tolerant   |
| 237606_PM_at        | CD53                                              | CD53 molecule                                                                 | 0.00456 | 1.45  | 1 Year Tolerant up vs 1 Year Non-Tolerant   |
| 1568795_PM_at       | EST42                                             | EST42                                                                         | 0.00457 | 1.25  | 1 Year Tolerant up vs 1 Year Non-Tolerant   |
| 223597_PM_at        | ITLN1                                             | intelectin 1 (galactofuranose binding)                                        | 0.00458 | 1.72  | 1 Year Tolerant up vs 1 Year Non-Tolerant   |
| 222505_PM_at        | LMBR1                                             | limb region 1 homolog (mouse)                                                 | 0.00459 | 1.58  | 1 Year Tolerant up vs 1 Year Non-Tolerant   |
| 211993_PM_at        | WNK1                                              | WNK lysine deficient protein kinase 1                                         | 0.00464 | 1.63  | 1 Year Tolerant up vs 1 Year Non-Tolerant   |
| 214929_PM_s_at      | KIAA1109                                          | KIAA1109                                                                      | 0.00468 | 1.34  | 1 Year Tolerant up vs 1 Year Non-Tolerant   |
| AFFX-r2-Bs-lys-M_at | EST43                                             | EST43                                                                         | 0.00469 | 3.58  | 1 Year Tolerant up vs 1 Year Non-Tolerant   |
| 217742_PM_s_at      | WAC                                               | WW domain containing adaptor with coiled-coil                                 | 0.00470 | -1.16 | 1 Year Tolerant down vs 1 Year Non-Tolerant |

|                |          |                                                                            |         |       |                                             |
|----------------|----------|----------------------------------------------------------------------------|---------|-------|---------------------------------------------|
| AFFX-LysX-3_at | EST44    | EST44                                                                      | 0.00474 | 3.30  | 1 Year Tolerant up vs 1 Year Non-Tolerant   |
| 212237_PM_at   | ASXL1    | additional sex combs like 1 (Drosophila)                                   | 0.00474 | -1.38 | 1 Year Tolerant down vs 1 Year Non-Tolerant |
| 207354_PM_at   | CCL16    | chemokine (C-C motif) ligand 16                                            | 0.00476 | -1.20 | 1 Year Tolerant down vs 1 Year Non-Tolerant |
| 202570_PM_s_at | DLGAP4   | discs, large (Drosophila) homolog-associated protein 4                     | 0.00479 | -1.57 | 1 Year Tolerant down vs 1 Year Non-Tolerant |
| 243826_PM_at   | EST45    | EST45                                                                      | 0.00480 | 1.76  | 1 Year Tolerant up vs 1 Year Non-Tolerant   |
| 1569371_PM_at  | LRRC59   | leucine rich repeat containing 59                                          | 0.00481 | 1.25  | 1 Year Tolerant up vs 1 Year Non-Tolerant   |
| 1568853_PM_at  | EST46    | EST46                                                                      | 0.00482 | -1.33 | 1 Year Tolerant down vs 1 Year Non-Tolerant |
| 1558466_PM_at  | UGGT2    | UDP-glucose glycoprotein glucosyltransferase 2                             | 0.00483 | 1.36  | 1 Year Tolerant up vs 1 Year Non-Tolerant   |
| 228265_PM_at   | EST47    | EST47                                                                      | 0.00483 | 1.31  | 1 Year Tolerant up vs 1 Year Non-Tolerant   |
| 1556352_PM_at  | EST48    | EST48                                                                      | 0.00485 | 2.13  | 1 Year Tolerant up vs 1 Year Non-Tolerant   |
| 237637_PM_at   | EST49    | EST49                                                                      | 0.00486 | 1.42  | 1 Year Tolerant up vs 1 Year Non-Tolerant   |
| 216174_PM_at   | HCRP1    | hepatocellular carcinoma-related HCRP1                                     | 0.00487 | 1.26  | 1 Year Tolerant up vs 1 Year Non-Tolerant   |
| 203069_PM_at   | SV2A     | synaptic vesicle glycoprotein 2A                                           | 0.00488 | 1.33  | 1 Year Tolerant up vs 1 Year Non-Tolerant   |
| 201390_PM_s_at | CSNK2B   | casein kinase 2, beta polypeptide                                          | 0.00494 | -1.35 | 1 Year Tolerant down vs 1 Year Non-Tolerant |
| 234956_PM_at   | LOC93444 | hypothetical protein LOC93444                                              | 0.00496 | 1.28  | 1 Year Tolerant up vs 1 Year Non-Tolerant   |
| 226997_PM_at   | ADAMTS12 | ADAM metalloproteinase with thrombospondin type 1 motif, 12                | 0.00498 | 1.28  | 1 Year Tolerant up vs 1 Year Non-Tolerant   |
| 207560_PM_at   | SLC28A1  | solute carrier family 28 (sodium-coupled nucleoside transporter), member 1 | 0.00499 | 1.40  | 1 Year Tolerant up vs 1 Year Non-Tolerant   |

**Supplementary Table S3: 2 Year Tolerant vs. 2 Year Non-Tolerant (p<0.005)**

| Probeset ID     | Gene Symbol              | Gene Title                                                                              | p-value(2 Year Tolerant vs. 2 Year Non-Tolerant) | Fold-Change (2 Year Tolerant vs. 2 Year Non-Tolerant) | Fold-Change(2 Year Tolerant vs. 2 Year Non-Tolerant) (Description) |
|-----------------|--------------------------|-----------------------------------------------------------------------------------------|--------------------------------------------------|-------------------------------------------------------|--------------------------------------------------------------------|
| 243376_PM_at    | EST1                     | EST1                                                                                    | 5.47E-06                                         | 1.98                                                  | 2 Year Tolerant up vs 2 Year Non-Tolerant                          |
| 203969_PM_at    | PEX3                     | peroxisomal biogenesis factor 3                                                         | 2.10E-05                                         | -1.83                                                 | 2 Year Tolerant down vs 2 Year Non-Tolerant                        |
| 215211_PM_at    | RRN3P1                   | RNA polymerase I transcription factor homolog (S. cerevisiae) pseudogene 1              | 2.91E-05                                         | -2.44                                                 | 2 Year Tolerant down vs 2 Year Non-Tolerant                        |
| 233436_PM_at    | MTBP                     | Mdm2, transformed 3T3 cell double minute 2, p53 binding protein (mouse) binding protein | 3.33E-05                                         | -1.42                                                 | 2 Year Tolerant down vs 2 Year Non-Tolerant                        |
| 1565759_PM_at   | RPL13                    | Ribosomal protein L13                                                                   | 4.63E-05                                         | -2.11                                                 | 2 Year Tolerant down vs 2 Year Non-Tolerant                        |
| 211330_PM_s_at  | HFE                      | hemochromatosis                                                                         | 0.00011037                                       | 1.62                                                  | 2 Year Tolerant up vs 2 Year Non-Tolerant                          |
| 225562_PM_at    | RASA3                    | RAS p21 protein activator 3                                                             | 0.0001421                                        | -1.45                                                 | 2 Year Tolerant down vs 2 Year Non-Tolerant                        |
| 227106_PM_at    | LOC440104                | 1110012D08Rik pseudogene                                                                | 0.00016357                                       | -1.60                                                 | 2 Year Tolerant down vs 2 Year Non-Tolerant                        |
| 212475_PM_at    | AVL9                     | AVL9 homolog (S. cerevisiae)                                                            | 0.00019908                                       | 1.63                                                  | 2 Year Tolerant up vs 2 Year Non-Tolerant                          |
| 229577_PM_at    | AGPAT6                   | 1-acylglycerol-3-phosphate O-acyltransferase 6 (lysophosphatidic acid acyltransferase,  | 0.00024443                                       | -1.60                                                 | 2 Year Tolerant down vs 2 Year Non-Tolerant                        |
| 231016_PM_s_at  | ARNT                     | Aryl hydrocarbon receptor nuclear translocator                                          | 0.00025127                                       | 1.68                                                  | 2 Year Tolerant up vs 2 Year Non-Tolerant                          |
| 220095_PM_at    | CNTLN                    | centlein, centrosomal protein                                                           | 0.00027423                                       | 1.44                                                  | 2 Year Tolerant up vs 2 Year Non-Tolerant                          |
| 210222_PM_s_at  | RTN1                     | reticulon 1                                                                             | 0.00030478                                       | 1.98                                                  | 2 Year Tolerant up vs 2 Year Non-Tolerant                          |
| 204438_PM_at    | MRC1 /// MRC1L1          | mannose receptor, C type 1 /// mannose receptor, C type 1-like 1                        | 0.00041898                                       | 2.05                                                  | 2 Year Tolerant up vs 2 Year Non-Tolerant                          |
| 207960_PM_at    | EST2                     | EST2                                                                                    | 0.00043923                                       | 1.37                                                  | 2 Year Tolerant up vs 2 Year Non-Tolerant                          |
| 1555881_PM_s_at | LZTS2                    | leucine zipper, putative tumor suppressor 2                                             | 0.00046645                                       | -1.40                                                 | 2 Year Tolerant down vs 2 Year Non-Tolerant                        |
| 239726_PM_at    | EST3                     | EST3                                                                                    | 0.00047504                                       | -2.54                                                 | 2 Year Tolerant down vs 2 Year Non-Tolerant                        |
| 222040_PM_at    | HNRNPA1 /// LOC100506653 | heterogeneous nuclear ribonucleoprotein A1 /// hypothetical LOC100506653                | 0.00048921                                       | -1.77                                                 | 2 Year Tolerant down vs 2 Year Non-Tolerant                        |
| 233274_PM_at    | EST4                     | EST4                                                                                    | 0.00050641                                       | -1.61                                                 | 2 Year Tolerant down vs 2 Year Non-Tolerant                        |
| 230344_PM_x_at  | EST5                     | EST5                                                                                    | 0.00051943                                       | 1.30                                                  | 2 Year Tolerant up vs 2 Year Non-Tolerant                          |
| 232586_PM_x_at  | OR7E126P                 | olfactory receptor, family 7, subfamily E, member 126 pseudogene                        | 0.00057558                                       | -1.75                                                 | 2 Year Tolerant down vs 2 Year Non-Tolerant                        |
| 223861_PM_at    | HORMAD1                  | HORMA domain containing 1                                                               | 0.00058423                                       | 1.40                                                  | 2 Year Tolerant up vs 2 Year Non-Tolerant                          |
| 226484_PM_at    | ZBTB47                   | zinc finger and BTB domain containing 47                                                | 0.00062582                                       | 1.41                                                  | 2 Year Tolerant up vs 2 Year Non-Tolerant                          |
| 201041_PM_s_at  | DUSP1                    | dual specificity phosphatase 1                                                          | 0.00063087                                       | 1.35                                                  | 2 Year Tolerant up vs 2 Year Non-Tolerant                          |
| 235555_PM_at    | EST6                     | EST6                                                                                    | 0.00063337                                       | 1.47                                                  | 2 Year Tolerant up vs 2 Year Non-Tolerant                          |
| 1556042_PM_s_at | LOC338799                | hypothetical LOC338799                                                                  | 0.00063481                                       | -1.76                                                 | 2 Year Tolerant down vs 2 Year Non-Tolerant                        |
| 212377_PM_s_at  | NOTCH2                   | notch 2                                                                                 | 0.00065626                                       | 1.35                                                  | 2 Year Tolerant up vs 2 Year Non-Tolerant                          |



|                 |                  |                                                                                    |            |       |                                             |
|-----------------|------------------|------------------------------------------------------------------------------------|------------|-------|---------------------------------------------|
| 1570032_PM_at   | AP3B2            | adaptor-related protein complex 3, beta 2 subunit                                  | 0.0006666  | -1.44 | 2 Year Tolerant down vs 2 Year Non-Tolerant |
| 41644_PM_at     | SASH1            | SAM and SH3 domain containing 1                                                    | 0.00072946 | 2.01  | 2 Year Tolerant up vs 2 Year Non-Tolerant   |
| 214639_PM_s_at  | HOXA1            | homeobox A1                                                                        | 0.0007466  | 1.68  | 2 Year Tolerant up vs 2 Year Non-Tolerant   |
| 236587_PM_at    | EST7             | EST7                                                                               | 0.00077043 | 1.52  | 2 Year Tolerant up vs 2 Year Non-Tolerant   |
| 206385_PM_s_at  | ANK3             | ankyrin 3, node of Ranvier (ankyrin G)                                             | 0.00080438 | -2.08 | 2 Year Tolerant down vs 2 Year Non-Tolerant |
| 222788_PM_s_at  | RSBN1            | round spermatid basic protein 1                                                    | 0.00082499 | -1.38 | 2 Year Tolerant down vs 2 Year Non-Tolerant |
| 202377_PM_at    | LEPROT           | leptin receptor overlapping transcript                                             | 0.00087258 | 1.67  | 2 Year Tolerant up vs 2 Year Non-Tolerant   |
| 1564401_PM_at   | LOC400748        | hypothetical LOC400748                                                             | 0.0008797  | -1.29 | 2 Year Tolerant down vs 2 Year Non-Tolerant |
| 219700_PM_at    | PLXDC1           | plexin domain containing 1                                                         | 0.00088176 | -2.29 | 2 Year Tolerant down vs 2 Year Non-Tolerant |
| 213958_PM_at    | CD6              | CD6 molecule                                                                       | 0.00089125 | -2.10 | 2 Year Tolerant down vs 2 Year Non-Tolerant |
| 221876_PM_at    | ZNF783           | zinc finger family member 783                                                      | 0.00090529 | -1.42 | 2 Year Tolerant down vs 2 Year Non-Tolerant |
| 1555500_PM_s_at | SLC2A4RG         | SLC2A4 regulator                                                                   | 0.00093689 | -1.65 | 2 Year Tolerant down vs 2 Year Non-Tolerant |
| 1568858_PM_at   | EST8             | EST8                                                                               | 0.00095265 | -1.32 | 2 Year Tolerant down vs 2 Year Non-Tolerant |
| 205213_PM_at    | ACAP1            | ArfGAP with coiled-coil, ankyrin repeat and PH domains 1                           | 0.0010482  | -1.67 | 2 Year Tolerant down vs 2 Year Non-Tolerant |
| 1558477_PM_at   | LOC100131496     | hypothetical LOC100131496                                                          | 0.00104964 | -1.27 | 2 Year Tolerant down vs 2 Year Non-Tolerant |
| 1564274_PM_at   | C9orf47          | chromosome 9 open reading frame 47                                                 | 0.00106172 | 1.84  | 2 Year Tolerant up vs 2 Year Non-Tolerant   |
| 233302_PM_at    | EST9             | EST9                                                                               | 0.00108092 | -2.76 | 2 Year Tolerant down vs 2 Year Non-Tolerant |
| 1559835_PM_at   | EST10            | EST10                                                                              | 0.00108619 | 2.08  | 2 Year Tolerant up vs 2 Year Non-Tolerant   |
| 1569190_PM_at   | SCLT1            | sodium channel and clathrin linker 1                                               | 0.00110443 | 1.57  | 2 Year Tolerant up vs 2 Year Non-Tolerant   |
| 221406_PM_s_at  | C6orf26 /// MSH5 | chromosome 6 open reading frame 26 /// mutS homolog 5 (E. coli)                    | 0.00112225 | -1.39 | 2 Year Tolerant down vs 2 Year Non-Tolerant |
| 213703_PM_at    | LOC150759        | hypothetical LOC150759                                                             | 0.00115889 | -2.09 | 2 Year Tolerant down vs 2 Year Non-Tolerant |
| 202443_PM_x_at  | NOTCH2           | notch 2                                                                            | 0.00120688 | 1.25  | 2 Year Tolerant up vs 2 Year Non-Tolerant   |
| 204712_PM_at    | WIF1             | WNT inhibitory factor 1                                                            | 0.00123246 | -1.45 | 2 Year Tolerant down vs 2 Year Non-Tolerant |
| 203485_PM_at    | RTN1             | reticulon 1                                                                        | 0.00126681 | 1.98  | 2 Year Tolerant up vs 2 Year Non-Tolerant   |
| 208274_PM_at    | OCLM             | oculomedin                                                                         | 0.00131972 | -1.29 | 2 Year Tolerant down vs 2 Year Non-Tolerant |
| 221583_PM_s_at  | KCNMA1           | potassium large conductance calcium-activated channel, subfamily M, alpha member 1 | 0.00137041 | 1.25  | 2 Year Tolerant up vs 2 Year Non-Tolerant   |
| 242438_PM_at    | ASXL1            | additional sex combs like 1 (Drosophila)                                           | 0.00138347 | -1.78 | 2 Year Tolerant down vs 2 Year Non-Tolerant |
| 238156_PM_at    | EST11            | EST11                                                                              | 0.00144626 | -1.55 | 2 Year Tolerant down vs 2 Year Non-Tolerant |
| 36545_PM_s_at   | SFI1             | Sfi1 homolog, spindle assembly associated (yeast)                                  | 0.00146718 | -1.74 | 2 Year Tolerant down vs 2 Year Non-Tolerant |
| 225240_PM_s_at  | MSI2             | musashi homolog 2 (Drosophila)                                                     | 0.00146861 | -1.69 | 2 Year Tolerant down vs 2 Year Non-Tolerant |
| 232139_PM_s_at  | KIAA1919         | KIAA1919                                                                           | 0.00148122 | 1.49  | 2 Year Tolerant up vs 2 Year Non-Tolerant   |
| 1567612_PM_at   | EST12            | EST12                                                                              | 0.00150744 | 1.35  | 2 Year Tolerant up vs 2 Year Non-Tolerant   |
| 237623_PM_at    | CST3             | cystatin C                                                                         | 0.00155698 | 2.06  | 2 Year Tolerant up vs 2 Year Non-Tolerant   |
| 203139_PM_at    | DAPK1            | death-associated protein kinase 1                                                  | 0.00159958 | 1.59  | 2 Year Tolerant up vs 2 Year Non-Tolerant   |

|                |                                  |                                                            |            |       |                                             |
|----------------|----------------------------------|------------------------------------------------------------|------------|-------|---------------------------------------------|
| 227010_PM_at   | EST13                            | EST13                                                      | 0.00161736 | 1.52  | 2 Year Tolerant up vs 2 Year Non-Tolerant   |
| 202880_PM_s_at | CYTH1                            | cytohesin 1                                                | 0.00169054 | -1.29 | 2 Year Tolerant down vs 2 Year Non-Tolerant |
| 240669_PM_at   | EST14                            | EST14                                                      | 0.00169771 | 1.29  | 2 Year Tolerant up vs 2 Year Non-Tolerant   |
| 215767_PM_at   | ZNF804A                          | zinc finger protein 804A                                   | 0.00175274 | 1.43  | 2 Year Tolerant up vs 2 Year Non-Tolerant   |
| 233570_PM_at   | EST15                            | EST15                                                      | 0.00175429 | -1.45 | 2 Year Tolerant down vs 2 Year Non-Tolerant |
| 206381_PM_at   | SCN2A                            | sodium channel, voltage-gated, type II, alpha subunit      | 0.00178518 | -1.42 | 2 Year Tolerant down vs 2 Year Non-Tolerant |
| 1566448_PM_at  | CD6                              | CD6 molecule                                               | 0.00187045 | -2.33 | 2 Year Tolerant down vs 2 Year Non-Tolerant |
| 1565716_PM_at  | FUS                              | fused in sarcoma                                           | 0.00187047 | -2.24 | 2 Year Tolerant down vs 2 Year Non-Tolerant |
| 202398_PM_at   | AP3S2                            | adaptor-related protein complex 3, sigma 2 subunit         | 0.00187892 | 1.33  | 2 Year Tolerant up vs 2 Year Non-Tolerant   |
| 218801_PM_at   | UGGT2                            | UDP-glucose glycoprotein glucosyltransferase 2             | 0.00192208 | 1.71  | 2 Year Tolerant up vs 2 Year Non-Tolerant   |
| 226507_PM_at   | PAK1                             | p21 protein (Cdc42/Rac)-activated kinase 1                 | 0.00194652 | 1.49  | 2 Year Tolerant up vs 2 Year Non-Tolerant   |
| 241353_PM_s_at | LOC100507507 ///<br>LOC100508744 | hypothetical LOC100507507 /// hypothetical<br>LOC100508744 | 0.00202079 | 1.64  | 2 Year Tolerant up vs 2 Year Non-Tolerant   |
| 226022_PM_at   | SASH1                            | SAM and SH3 domain containing 1                            | 0.00207019 | 2.53  | 2 Year Tolerant up vs 2 Year Non-Tolerant   |
| 1553133_PM_at  | C9orf72                          | chromosome 9 open reading frame 72                         | 0.00213361 | 1.94  | 2 Year Tolerant up vs 2 Year Non-Tolerant   |
| 1556827_PM_at  | LOC339929                        | hypothetical LOC339929                                     | 0.00222775 | 1.39  | 2 Year Tolerant up vs 2 Year Non-Tolerant   |
| 242167_PM_at   | EST16                            | EST16                                                      | 0.00224132 | -1.68 | 2 Year Tolerant down vs 2 Year Non-Tolerant |
| 203184_PM_at   | FBN2                             | fibrillin 2                                                | 0.00226711 | 2.12  | 2 Year Tolerant up vs 2 Year Non-Tolerant   |
| 40489_PM_at    | ATN1                             | atrophin 1                                                 | 0.00227507 | -1.24 | 2 Year Tolerant down vs 2 Year Non-Tolerant |
| 226490_PM_at   | NHSL1                            | NHS-like 1                                                 | 0.00230843 | 1.51  | 2 Year Tolerant up vs 2 Year Non-Tolerant   |
| 215592_PM_at   | EST17                            | EST17                                                      | 0.00232236 | -2.10 | 2 Year Tolerant down vs 2 Year Non-Tolerant |
| 204043_PM_at   | TCN2                             | transcobalamin II                                          | 0.00234292 | 1.60  | 2 Year Tolerant up vs 2 Year Non-Tolerant   |
| 1557721_PM_at  | EST18                            | EST18                                                      | 0.00236584 | -1.30 | 2 Year Tolerant down vs 2 Year Non-Tolerant |
| 212758_PM_s_at | ZEB1                             | zinc finger E-box binding homeobox 1                       | 0.00238321 | -1.78 | 2 Year Tolerant down vs 2 Year Non-Tolerant |
| 221756_PM_at   | PIK3IP1                          | phosphoinositide-3-kinase interacting protein 1            | 0.00246854 | -1.79 | 2 Year Tolerant down vs 2 Year Non-Tolerant |
| 218552_PM_at   | ECHDC2                           | enoyl CoA hydratase domain containing 2                    | 0.00246891 | -1.59 | 2 Year Tolerant down vs 2 Year Non-Tolerant |
| 242733_PM_at   | EST19                            | EST19                                                      | 0.00247297 | -1.57 | 2 Year Tolerant down vs 2 Year Non-Tolerant |
| 227135_PM_at   | NAAA                             | N-acylethanolamine acid amidase                            | 0.00252204 | 1.48  | 2 Year Tolerant up vs 2 Year Non-Tolerant   |
| 235857_PM_at   | KCTD11                           | potassium channel tetramerisation domain containing 11     | 0.00252345 | 1.47  | 2 Year Tolerant up vs 2 Year Non-Tolerant   |
| 243404_PM_at   | EST20                            | EST20                                                      | 0.00253779 | -1.91 | 2 Year Tolerant down vs 2 Year Non-Tolerant |
| 210187_PM_at   | FKBP1A                           | FK506 binding protein 1A, 12kDa                            | 0.00254624 | 1.90  | 2 Year Tolerant up vs 2 Year Non-Tolerant   |
| 201668_PM_x_at | MARCKS                           | myristoylated alanine-rich protein kinase C substrate      | 0.00262409 | 2.05  | 2 Year Tolerant up vs 2 Year Non-Tolerant   |
| 201531_PM_at   | ZFP36                            | zinc finger protein 36, C3H type, homolog (mouse)          | 0.0026484  | 1.54  | 2 Year Tolerant up vs 2 Year Non-Tolerant   |
| 242958_PM_x_at | EST21                            | EST21                                                      | 0.00274501 | 1.56  | 2 Year Tolerant up vs 2 Year Non-Tolerant   |

|                 |              |                                                                                       |            |       |                                             |
|-----------------|--------------|---------------------------------------------------------------------------------------|------------|-------|---------------------------------------------|
| 207291_PM_at    | PRRG4        | proline rich Gla (G-carboxyglutamic acid) 4 (transmembrane)                           | 0.00274898 | 1.61  | 2 Year Tolerant up vs 2 Year Non-Tolerant   |
| 1560656_PM_at   | LOC100507572 | hypothetical LOC100507572                                                             | 0.00276338 | -1.28 | 2 Year Tolerant down vs 2 Year Non-Tolerant |
| 220155_PM_s_at  | BRD9         | bromodomain containing 9                                                              | 0.00282734 | -1.37 | 2 Year Tolerant down vs 2 Year Non-Tolerant |
| 1565786_PM_x_at | FLJ45482     | hypothetical LOC645566                                                                | 0.00287558 | -1.35 | 2 Year Tolerant down vs 2 Year Non-Tolerant |
| 1558467_PM_a_at | UGGT2        | UDP-glucose glycoprotein glucosyltransferase 2                                        | 0.00292223 | 1.45  | 2 Year Tolerant up vs 2 Year Non-Tolerant   |
| 219147_PM_s_at  | C9orf95      | chromosome 9 open reading frame 95                                                    | 0.00292711 | -1.90 | 2 Year Tolerant down vs 2 Year Non-Tolerant |
| 211794_PM_at    | FYB          | FYN binding protein                                                                   | 0.00293974 | 1.62  | 2 Year Tolerant up vs 2 Year Non-Tolerant   |
| 233420_PM_at    | EST22        | EST22                                                                                 | 0.00295194 | -1.30 | 2 Year Tolerant down vs 2 Year Non-Tolerant |
| 221042_PM_s_at  | CLMN         | calmin (calponin-like, transmembrane)                                                 | 0.00297542 | 1.90  | 2 Year Tolerant up vs 2 Year Non-Tolerant   |
| 239266_PM_at    | EST23        | EST23                                                                                 | 0.00297974 | -2.03 | 2 Year Tolerant down vs 2 Year Non-Tolerant |
| 232072_PM_at    | EST24        | EST24                                                                                 | 0.00304627 | 1.71  | 2 Year Tolerant up vs 2 Year Non-Tolerant   |
| 1554643_PM_at   | RGS11        | regulator of G-protein signaling 11                                                   | 0.00306546 | -1.23 | 2 Year Tolerant down vs 2 Year Non-Tolerant |
| 236487_PM_at    | SCLT1        | sodium channel and clathrin linker 1                                                  | 0.00307286 | 1.72  | 2 Year Tolerant up vs 2 Year Non-Tolerant   |
| 204748_PM_at    | PTGS2        | prostaglandin-endoperoxide synthase 2 (prostaglandin G/H synthase and cyclooxygenase) | 0.0030812  | 3.43  | 2 Year Tolerant up vs 2 Year Non-Tolerant   |
| 208771_PM_s_at  | LTA4H        | leukotriene A4 hydrolase                                                              | 0.00310187 | 1.60  | 2 Year Tolerant up vs 2 Year Non-Tolerant   |
| 201739_PM_at    | SGK1         | serum/glucocorticoid regulated kinase 1                                               | 0.00314309 | 1.79  | 2 Year Tolerant up vs 2 Year Non-Tolerant   |
| 243954_PM_at    | LOC285286    | hypothetical LOC285286                                                                | 0.00315296 | 1.80  | 2 Year Tolerant up vs 2 Year Non-Tolerant   |
| 212048_PM_s_at  | YARS         | tyrosyl-tRNA synthetase                                                               | 0.00318905 | -1.24 | 2 Year Tolerant down vs 2 Year Non-Tolerant |
| 203638_PM_s_at  | FGFR2        | fibroblast growth factor receptor 2                                                   | 0.00319566 | -1.41 | 2 Year Tolerant down vs 2 Year Non-Tolerant |
| 202813_PM_at    | TARBP1       | TAR (HIV-1) RNA binding protein 1                                                     | 0.00320069 | -1.54 | 2 Year Tolerant down vs 2 Year Non-Tolerant |
| 209442_PM_x_at  | ANK3         | ankyrin 3, node of Ranvier (ankyrin G)                                                | 0.00323885 | -1.70 | 2 Year Tolerant down vs 2 Year Non-Tolerant |
| 1556919_PM_at   | LEPR         | leptin receptor                                                                       | 0.00327539 | 1.28  | 2 Year Tolerant up vs 2 Year Non-Tolerant   |
| 1560169_PM_at   | EST25        | EST25                                                                                 | 0.00328441 | 1.80  | 2 Year Tolerant up vs 2 Year Non-Tolerant   |
| 232617_PM_at    | CTSS         | cathepsin S                                                                           | 0.00329016 | 1.34  | 2 Year Tolerant up vs 2 Year Non-Tolerant   |
| 241835_PM_at    | LOC100132147 | Hypothetical LOC100132147                                                             | 0.00331073 | -1.43 | 2 Year Tolerant down vs 2 Year Non-Tolerant |
| 205776_PM_at    | FMO5         | flavin containing monooxygenase 5                                                     | 0.00331754 | 1.53  | 2 Year Tolerant up vs 2 Year Non-Tolerant   |
| 237813_PM_at    | PCBP2        | poly(rC) binding protein 2                                                            | 0.00345351 | -1.52 | 2 Year Tolerant down vs 2 Year Non-Tolerant |
| 226474_PM_at    | NLRC5        | NLR family, CARD domain containing 5                                                  | 0.00345936 | -1.47 | 2 Year Tolerant down vs 2 Year Non-Tolerant |
| 221959_PM_at    | FAM110B      | family with sequence similarity 110, member B                                         | 0.00346108 | 1.57  | 2 Year Tolerant up vs 2 Year Non-Tolerant   |
| 228933_PM_at    | NHS          | Nance-Horan syndrome (congenital cataracts and dental anomalies)                      | 0.00346303 | 1.92  | 2 Year Tolerant up vs 2 Year Non-Tolerant   |
| 203726_PM_s_at  | LAMA3        | laminin, alpha 3                                                                      | 0.00348752 | -1.24 | 2 Year Tolerant down vs 2 Year Non-Tolerant |
| 208306_PM_x_at  | HLA-DRB1     | Major histocompatibility complex, class II, DR beta 1                                 | 0.00349694 | 1.23  | 2 Year Tolerant up vs 2 Year Non-Tolerant   |

|                 |                                                                                                                                                     |                                                                                         |            |       |                                             |
|-----------------|-----------------------------------------------------------------------------------------------------------------------------------------------------|-----------------------------------------------------------------------------------------|------------|-------|---------------------------------------------|
| 225300_PM_at    | C15orf23                                                                                                                                            | chromosome 15 open reading frame 23                                                     | 0.00350123 | 1.74  | 2 Year Tolerant up vs 2 Year Non-Tolerant   |
| 201669_PM_s_at  | MARCKS                                                                                                                                              | myristoylated alanine-rich protein kinase C substrate                                   | 0.00351818 | 1.72  | 2 Year Tolerant up vs 2 Year Non-Tolerant   |
| 225077_PM_at    | CHD2                                                                                                                                                | chromodomain helicase DNA binding protein 2                                             | 0.00359734 | -1.33 | 2 Year Tolerant down vs 2 Year Non-Tolerant |
| 230020_PM_at    | NAA38                                                                                                                                               | N(alpha)-acetyltransferase 38, NatC auxiliary subunit                                   | 0.00359927 | 1.48  | 2 Year Tolerant up vs 2 Year Non-Tolerant   |
| 210724_PM_at    | EMR3                                                                                                                                                | egf-like module containing, mucin-like, hormone receptor-like 3                         | 0.00362028 | 1.75  | 2 Year Tolerant up vs 2 Year Non-Tolerant   |
| 201853_PM_s_at  | CDC25B                                                                                                                                              | cell division cycle 25 homolog B (S. pombe)                                             | 0.00362145 | -1.67 | 2 Year Tolerant down vs 2 Year Non-Tolerant |
| 1559035_PM_a_at | EST26                                                                                                                                               | EST26                                                                                   | 0.00366514 | 3.18  | 2 Year Tolerant up vs 2 Year Non-Tolerant   |
| 1553134_PM_s_at | C9orf72                                                                                                                                             | chromosome 9 open reading frame 72                                                      | 0.00369133 | 2.19  | 2 Year Tolerant up vs 2 Year Non-Tolerant   |
| 1562529_PM_s_at | EST27                                                                                                                                               | EST27                                                                                   | 0.00371821 | -2.02 | 2 Year Tolerant down vs 2 Year Non-Tolerant |
| 230536_PM_at    | PBX4                                                                                                                                                | pre-B-cell leukemia homeobox 4                                                          | 0.0037227  | -1.68 | 2 Year Tolerant down vs 2 Year Non-Tolerant |
| 203755_PM_at    | BUB1B                                                                                                                                               | budding uninhibited by benzimidazoles 1 homolog beta (yeast)                            | 0.00376507 | -1.49 | 2 Year Tolerant down vs 2 Year Non-Tolerant |
| 223593_PM_at    | AADAT                                                                                                                                               | aminoadipate aminotransferase                                                           | 0.00377354 | -1.32 | 2 Year Tolerant down vs 2 Year Non-Tolerant |
| 228008_PM_at    | EST28                                                                                                                                               | EST28                                                                                   | 0.00378097 | 1.53  | 2 Year Tolerant up vs 2 Year Non-Tolerant   |
| 215193_PM_x_at  | HLA-DRB1 /// HLA-DRB3<br>/// HLA-DRB4 /// HLA-DRB5 /// LOC100133661<br>/// LOC100294036 ///<br>LOC100509582 ///<br>LOC100510495 ///<br>LOC100510519 | major histocompatibility complex, class II, DR beta 1 /// major histocompatibility comp | 0.00378256 | 1.24  | 2 Year Tolerant up vs 2 Year Non-Tolerant   |
| 238893_PM_at    | LOC338758                                                                                                                                           | hypothetical LOC338758                                                                  | 0.00378526 | 1.86  | 2 Year Tolerant up vs 2 Year Non-Tolerant   |
| 1560661_PM_x_at | EST29                                                                                                                                               | EST29                                                                                   | 0.00379327 | -1.62 | 2 Year Tolerant down vs 2 Year Non-Tolerant |
| 236921_PM_at    | EST30                                                                                                                                               | EST30                                                                                   | 0.00379333 | -1.76 | 2 Year Tolerant down vs 2 Year Non-Tolerant |
| 235476_PM_at    | TRIM59                                                                                                                                              | tripartite motif-containing 59                                                          | 0.00380578 | -1.91 | 2 Year Tolerant down vs 2 Year Non-Tolerant |
| 1561306_PM_s_at | STRC                                                                                                                                                | stereocilin                                                                             | 0.00389653 | -1.33 | 2 Year Tolerant down vs 2 Year Non-Tolerant |
| 205722_PM_s_at  | GFRA2                                                                                                                                               | GDNF family receptor alpha 2                                                            | 0.00390692 | 1.58  | 2 Year Tolerant up vs 2 Year Non-Tolerant   |
| 204294_PM_at    | AMT                                                                                                                                                 | aminomethyltransferase                                                                  | 0.00392436 | -1.47 | 2 Year Tolerant down vs 2 Year Non-Tolerant |
| 1552501_PM_a_at | GPBAR1                                                                                                                                              | G protein-coupled bile acid receptor 1                                                  | 0.00393089 | 1.66  | 2 Year Tolerant up vs 2 Year Non-Tolerant   |
| 240139_PM_at    | EST31                                                                                                                                               | EST31                                                                                   | 0.00398798 | -1.67 | 2 Year Tolerant down vs 2 Year Non-Tolerant |
| 214402_PM_s_at  | SFI1                                                                                                                                                | Sfi1 homolog, spindle assembly associated (yeast)                                       | 0.00400461 | -1.54 | 2 Year Tolerant down vs 2 Year Non-Tolerant |

|                |           |                                                                            |            |       |                                             |
|----------------|-----------|----------------------------------------------------------------------------|------------|-------|---------------------------------------------|
| 201995_PM_at   | EXT1      | exostosin 1                                                                | 0.00412503 | 1.79  | 2 Year Tolerant up vs 2 Year Non-Tolerant   |
| 244185_PM_at   | EST32     | EST32                                                                      | 0.00419046 | -1.57 | 2 Year Tolerant down vs 2 Year Non-Tolerant |
| 209770_PM_at   | BTN3A1    | butyrophilin, subfamily 3, member A1                                       | 0.00425242 | -1.53 | 2 Year Tolerant down vs 2 Year Non-Tolerant |
| 231286_PM_at   | C9orf47   | chromosome 9 open reading frame 47                                         | 0.00426537 | 1.41  | 2 Year Tolerant up vs 2 Year Non-Tolerant   |
| 205434_PM_s_at | AAK1      | AP2 associated kinase 1                                                    | 0.00427192 | -1.49 | 2 Year Tolerant down vs 2 Year Non-Tolerant |
| 226208_PM_at   | ZSWIM6    | zinc finger, SWIM-type containing 6                                        | 0.00430118 | 1.45  | 2 Year Tolerant up vs 2 Year Non-Tolerant   |
| 236149_PM_at   | EST33     | EST33                                                                      | 0.00437401 | -1.51 | 2 Year Tolerant down vs 2 Year Non-Tolerant |
| 201189_PM_s_at | ITPR3     | inositol 1,4,5-triphosphate receptor, type 3                               | 0.00438832 | -1.75 | 2 Year Tolerant down vs 2 Year Non-Tolerant |
| 1569849_PM_at  | EST34     | EST34                                                                      | 0.00440118 | -1.31 | 2 Year Tolerant down vs 2 Year Non-Tolerant |
| 219019_PM_at   | LRDD      | leucine-rich repeats and death domain containing                           | 0.00447577 | -1.34 | 2 Year Tolerant down vs 2 Year Non-Tolerant |
| 215178_PM_x_at | NAAA      | N-acylethanolamine acid amidase                                            | 0.00452007 | 1.39  | 2 Year Tolerant up vs 2 Year Non-Tolerant   |
| 219236_PM_at   | PAQR6     | progesterone and adipoQ receptor family member VI                          | 0.0045271  | 1.45  | 2 Year Tolerant up vs 2 Year Non-Tolerant   |
| 235000_PM_at   | LPP       | LIM domain containing preferred translocation partner in lipoma            | 0.00453144 | 1.36  | 2 Year Tolerant up vs 2 Year Non-Tolerant   |
| 211965_PM_at   | ZFP36L1   | zinc finger protein 36, C3H type-like 1                                    | 0.0045381  | 2.04  | 2 Year Tolerant up vs 2 Year Non-Tolerant   |
| 239021_PM_at   | TLR6      | toll-like receptor 6                                                       | 0.00454602 | 1.79  | 2 Year Tolerant up vs 2 Year Non-Tolerant   |
| 220148_PM_at   | ALDH8A1   | aldehyde dehydrogenase 8 family, member A1                                 | 0.00454851 | -1.43 | 2 Year Tolerant down vs 2 Year Non-Tolerant |
| 203703_PM_s_at | TTLL4     | tubulin tyrosine ligase-like family, member 4                              | 0.00459435 | 1.40  | 2 Year Tolerant up vs 2 Year Non-Tolerant   |
| 202642_PM_s_at | TRRAP     | transformation/transcription domain-associated protein                     | 0.00462976 | -1.32 | 2 Year Tolerant down vs 2 Year Non-Tolerant |
| 235754_PM_at   | HFE       | hemochromatosis                                                            | 0.00463967 | 1.50  | 2 Year Tolerant up vs 2 Year Non-Tolerant   |
| 39891_PM_at    | ZNF710    | zinc finger protein 710                                                    | 0.00464779 | 1.48  | 2 Year Tolerant up vs 2 Year Non-Tolerant   |
| 213114_PM_at   | RER1      | RER1 retention in endoplasmic reticulum 1 homolog ( <i>S. cerevisiae</i> ) | 0.00465454 | 1.24  | 2 Year Tolerant up vs 2 Year Non-Tolerant   |
| 223259_PM_at   | ORMDL3    | ORM1-like 3 ( <i>S. cerevisiae</i> )                                       | 0.00471115 | -1.86 | 2 Year Tolerant down vs 2 Year Non-Tolerant |
| 228058_PM_at   | ZG16B     | zymogen granule protein 16 homolog B (rat)                                 | 0.00477821 | 1.83  | 2 Year Tolerant up vs 2 Year Non-Tolerant   |
| 243033_PM_at   | TWF1      | Twinfilin, actin-binding protein, homolog 1 ( <i>Drosophila</i> )          | 0.0047945  | -1.24 | 2 Year Tolerant down vs 2 Year Non-Tolerant |
| 238129_PM_s_at | EST35     | EST35                                                                      | 0.00482632 | 1.36  | 2 Year Tolerant up vs 2 Year Non-Tolerant   |
| 223068_PM_at   | EML4      | echinoderm microtubule associated protein like 4                           | 0.0048546  | -1.37 | 2 Year Tolerant down vs 2 Year Non-Tolerant |
| 1557399_PM_at  | LOC284009 | hypothetical LOC284009                                                     | 0.00487746 | -1.42 | 2 Year Tolerant down vs 2 Year Non-Tolerant |
| 233359_PM_at   | EST36     | EST36                                                                      | 0.00490426 | -1.60 | 2 Year Tolerant down vs 2 Year Non-Tolerant |
| 214152_PM_at   | CCPG1     | cell cycle progression 1                                                   | 0.00490769 | 1.50  | 2 Year Tolerant up vs 2 Year Non-Tolerant   |
| 216551_PM_x_at | PLCG1     | phospholipase C, gamma 1                                                   | 0.0049262  | -1.32 | 2 Year Tolerant down vs 2 Year Non-Tolerant |
| 225383_PM_at   | ZNF275    | zinc finger protein 275                                                    | 0.00496214 | -1.39 | 2 Year Tolerant down vs 2 Year Non-Tolerant |
| 1556172_PM_at  | EST37     | EST37                                                                      | 0.00498797 | 1.44  | 2 Year Tolerant up vs 2 Year Non-Tolerant   |

**Supplementary Table S4: List of 357 differentially expressed genes unique to Tol subjects potentially predictive of those patients that can be successful weaned off IS to tolerance.**

| Probeset ID     | Gene Symbol       | Gene Title                                                                             | p-value (On IS Tolerant vs. On IS Non-Tolerant) | Fold-Change (On IS Tolerant vs. On IS Non-Tolerant) | Fold-Change(On IS Tolerant vs. On IS Non-Tolerant) (Description) |
|-----------------|-------------------|----------------------------------------------------------------------------------------|-------------------------------------------------|-----------------------------------------------------|------------------------------------------------------------------|
| 227106_PM_at    | LOC440104         | 1110012D08Rik pseudogene                                                               | 1.19E-06                                        | -1.56391                                            | On IS Tolerant down vs On IS Non-Tolerant                        |
| 215717_PM_s_at  | FBN2              | fibrillin 2                                                                            | 7.53E-06                                        | 1.4585                                              | On IS Tolerant up vs On IS Non-Tolerant                          |
| 215211_PM_at    | RRN3P1            | RNA polymerase I transcription factor homolog ( <i>S. cerevisiae</i> ) pseudogene 1    | 1.03E-05                                        | -1.94258                                            | On IS Tolerant down vs On IS Non-Tolerant                        |
| 203788_PM_s_at  | SEMA3C            | sema domain, immunoglobulin domain (Ig), short basic domain, secreted, (semaphorin) 3C | 1.29E-05                                        | 1.34727                                             | On IS Tolerant up vs On IS Non-Tolerant                          |
| 212377_PM_s_at  | NOTCH2            | notch 2                                                                                | 1.55E-05                                        | 1.30913                                             | On IS Tolerant up vs On IS Non-Tolerant                          |
| 1556172_PM_at   | EST1              | EST1                                                                                   | 2.98E-05                                        | 1.46251                                             | On IS Tolerant up vs On IS Non-Tolerant                          |
| 225562_PM_at    | RASA3             | RAS p21 protein activator 3                                                            | 3.24E-05                                        | -1.33785                                            | On IS Tolerant down vs On IS Non-Tolerant                        |
| 212475_PM_at    | AVL9              | AVL9 homolog ( <i>S. cerevisiae</i> )                                                  | 3.43E-05                                        | 1.47899                                             | On IS Tolerant up vs On IS Non-Tolerant                          |
| 1559035_PM_a_at | EST2              | EST2                                                                                   | 3.61E-05                                        | 3.24836                                             | On IS Tolerant up vs On IS Non-Tolerant                          |
| 1555881_PM_s_at | LZTS2             | leucine zipper, putative tumor suppressor 2                                            | 4.64E-05                                        | -1.31899                                            | On IS Tolerant down vs On IS Non-Tolerant                        |
| 237623_PM_at    | CST3              | cystatin C                                                                             | 4.92E-05                                        | 1.96364                                             | On IS Tolerant up vs On IS Non-Tolerant                          |
| 202880_PM_s_at  | CYTH1             | cytohesin 1                                                                            | 5.42E-05                                        | -1.26444                                            | On IS Tolerant down vs On IS Non-Tolerant                        |
| 239956_PM_at    | EST3              | EST3                                                                                   | 5.65E-05                                        | 1.8699                                              | On IS Tolerant up vs On IS Non-Tolerant                          |
| 41644_PM_at     | SASH1             | SAM and SH3 domain containing 1                                                        | 6.28E-05                                        | 1.79251                                             | On IS Tolerant up vs On IS Non-Tolerant                          |
| 219126_PM_at    | PHF10             | PHD finger protein 10                                                                  | 6.93E-05                                        | -1.29741                                            | On IS Tolerant down vs On IS Non-Tolerant                        |
| 242958_PM_x_at  | EST4              | EST4                                                                                   | 7.43E-05                                        | 1.50965                                             | On IS Tolerant up vs On IS Non-Tolerant                          |
| 1556173_PM_a_at | EST5              | EST5                                                                                   | 8.50E-05                                        | 2.16701                                             | On IS Tolerant up vs On IS Non-Tolerant                          |
| 220095_PM_at    | CNTLN             | centlein, centrosomal protein                                                          | 0.000105298                                     | 1.3112                                              | On IS Tolerant up vs On IS Non-Tolerant                          |
| 229949_PM_at    | LOC100507625      | hypothetical LOC100507625                                                              | 0.000115151                                     | -1.35319                                            | On IS Tolerant down vs On IS Non-Tolerant                        |
| 1570032_PM_at   | AP3B2             | adaptor-related protein complex 3, beta 2 subunit                                      | 0.000121378                                     | -1.33632                                            | On IS Tolerant down vs On IS Non-Tolerant                        |
| 221992_PM_at    | NPIPL2 /// NPIPL3 | nuclear pore complex-interacting protein-like 3-like                                   | 0.000121417                                     | -2.43892                                            | On IS Tolerant down vs On IS Non-Tolerant                        |
| 202813_PM_at    | TARBP1            | TAR (HIV-1) RNA binding protein 1                                                      | 0.00012217                                      | -1.48514                                            | On IS Tolerant down vs On IS Non-Tolerant                        |
| 237606_PM_at    | CD53              | CD53 molecule                                                                          | 0.000124348                                     | 1.42373                                             | On IS Tolerant up vs On IS Non-Tolerant                          |
| 203139_PM_at    | DAPK1             | death-associated protein kinase 1                                                      | 0.000137147                                     | 1.4775                                              | On IS Tolerant up vs On IS Non-Tolerant                          |
| 220155_PM_s_at  | BRD9              | bromodomain containing 9                                                               | 0.000161724                                     | -1.3176                                             | On IS Tolerant down vs On IS Non-Tolerant                        |
| 243375_PM_at    | EST6              | EST6                                                                                   | 0.000162344                                     | 1.60156                                             | On IS Tolerant up vs On IS Non-Tolerant                          |

|                 |                 |                                                                  |             |          |                                           |
|-----------------|-----------------|------------------------------------------------------------------|-------------|----------|-------------------------------------------|
| 1558371_PM_a_at | EST7            | EST7                                                             | 0.000175939 | 2.14043  | On IS Tolerant up vs On IS Non-Tolerant   |
| 213236_PM_at    | SASH1           | SAM and SH3 domain containing 1                                  | 0.00018004  | 2.01577  | On IS Tolerant up vs On IS Non-Tolerant   |
| 204438_PM_at    | MRC1 /// MRC1L1 | mannose receptor, C type 1 /// mannose receptor, C type 1-like 1 | 0.000183272 | 1.71866  | On IS Tolerant up vs On IS Non-Tolerant   |
| 203184_PM_at    | FBN2            | fibrillin 2                                                      | 0.000196484 | 1.90675  | On IS Tolerant up vs On IS Non-Tolerant   |
| 207291_PM_at    | PRRG4           | proline rich Gla (G-carboxyglutamic acid) 4 (transmembrane)      | 0.000198648 | 1.50941  | On IS Tolerant up vs On IS Non-Tolerant   |
| 241098_PM_at    | CLEC7A          | C-type lectin domain family 7, member A                          | 0.000199916 | 1.83982  | On IS Tolerant up vs On IS Non-Tolerant   |
| 215415_PM_s_at  | LYST            | lysosomal trafficking regulator                                  | 0.000208852 | 1.73029  | On IS Tolerant up vs On IS Non-Tolerant   |
| 202443_PM_x_at  | NOTCH2          | notch 2                                                          | 0.000217078 | 1.19643  | On IS Tolerant up vs On IS Non-Tolerant   |
| 221006_PM_s_at  | SNX27           | sorting nexin family member 27                                   | 0.000217292 | 1.43049  | On IS Tolerant up vs On IS Non-Tolerant   |
| 225077_PM_at    | CHD2            | chromodomain helicase DNA binding protein 2                      | 0.000218776 | -1.29446 | On IS Tolerant down vs On IS Non-Tolerant |
| 218801_PM_at    | UGGT2           | UDP-glucose glycoprotein glucosyltransferase 2                   | 0.000235695 | 1.56354  | On IS Tolerant up vs On IS Non-Tolerant   |
| 203485_PM_at    | RTN1            | reticulon 1                                                      | 0.000236432 | 1.72945  | On IS Tolerant up vs On IS Non-Tolerant   |
| 226490_PM_at    | NHSL1           | NHS-like 1                                                       | 0.000238769 | 1.41593  | On IS Tolerant up vs On IS Non-Tolerant   |
| 222505_PM_at    | LMBR1           | limb region 1 homolog (mouse)                                    | 0.000250661 | 1.51102  | On IS Tolerant up vs On IS Non-Tolerant   |
| 219968_PM_at    | ZNF589          | zinc finger protein 589                                          | 0.000253259 | -1.4721  | On IS Tolerant down vs On IS Non-Tolerant |
| 232716_PM_at    | EST8            | EST8                                                             | 0.000271885 | 1.81257  | On IS Tolerant up vs On IS Non-Tolerant   |
| 243954_PM_at    | LOC285286       | hypothetical LOC285286                                           | 0.000274554 | 1.6678   | On IS Tolerant up vs On IS Non-Tolerant   |
| 1560049_PM_at   | EST9            | EST9                                                             | 0.000276424 | -1.30964 | On IS Tolerant down vs On IS Non-Tolerant |
| 216697_PM_at    | TRIO            | Triple functional domain (PTPRF interacting)                     | 0.000279837 | 1.47983  | On IS Tolerant up vs On IS Non-Tolerant   |
| 226134_PM_s_at  | EST10           | EST10                                                            | 0.000282483 | -1.6119  | On IS Tolerant down vs On IS Non-Tolerant |
| 237387_PM_at    | EST11           | EST11                                                            | 0.000289394 | 1.70597  | On IS Tolerant up vs On IS Non-Tolerant   |
| 1552501_PM_a_at | GPBAR1          | G protein-coupled bile acid receptor 1                           | 0.000301841 | 1.55862  | On IS Tolerant up vs On IS Non-Tolerant   |
| 236487_PM_at    | SCLT1           | sodium channel and clathrin linker 1                             | 0.000304138 | 1.58943  | On IS Tolerant up vs On IS Non-Tolerant   |
| 201995_PM_at    | EXT1            | exostosin 1                                                      | 0.000312575 | 1.69216  | On IS Tolerant up vs On IS Non-Tolerant   |
| 200944_PM_s_at  | HMG1            | high-mobility group nucleosome binding domain 1                  | 0.00031701  | -1.1956  | On IS Tolerant down vs On IS Non-Tolerant |
| 225240_PM_s_at  | MSI2            | musashi homolog 2 (Drosophila)                                   | 0.000344804 | -1.50549 | On IS Tolerant down vs On IS Non-Tolerant |
| 203969_PM_at    | PEX3            | peroxisomal biogenesis factor 3                                  | 0.00036642  | -1.4309  | On IS Tolerant down vs On IS Non-Tolerant |
| 203703_PM_s_at  | TTLL4           | tubulin tyrosine ligase-like family, member 4                    | 0.000366905 | 1.34001  | On IS Tolerant up vs On IS Non-Tolerant   |
| 211941_PM_s_at  | PEBP1           | phosphatidylethanolamine binding protein 1                       | 0.000403964 | -1.37962 | On IS Tolerant down vs On IS Non-Tolerant |
| 222721_PM_at    | CNIH4           | cornichon homolog 4 (Drosophila)                                 | 0.000408412 | 1.8728   | On IS Tolerant up vs On IS Non-Tolerant   |
| 212348_PM_s_at  | KDM1A           | lysine (K)-specific demethylase 1A                               | 0.000448652 | -1.30202 | On IS Tolerant down vs On IS Non-Tolerant |
| 224610_PM_at    | SNHG1           | small nucleolar RNA host gene 1 (non-protein coding)             | 0.000458062 | -1.3617  | On IS Tolerant down vs On IS Non-Tolerant |
| 213703_PM_at    | LOC150759       | hypothetical LOC150759                                           | 0.000529371 | -1.75115 | On IS Tolerant down vs On IS Non-Tolerant |

|                 |              |                                                                            |             |          |                                           |
|-----------------|--------------|----------------------------------------------------------------------------|-------------|----------|-------------------------------------------|
| 227462_PM_at    | ERAP2        | endoplasmic reticulum aminopeptidase 2                                     | 0.000553049 | -2.64472 | On IS Tolerant down vs On IS Non-Tolerant |
| 233465_PM_at    | EST12        | EST12                                                                      | 0.000558806 | 1.39747  | On IS Tolerant up vs On IS Non-Tolerant   |
| 206995_PM_x_at  | SCARF1       | scavenger receptor class F, member 1                                       | 0.000574937 | 1.35203  | On IS Tolerant up vs On IS Non-Tolerant   |
| 1558750_PM_a_at | LOC100288693 | Hypothetical protein LOC100288693                                          | 0.000587461 | -1.35078 | On IS Tolerant down vs On IS Non-Tolerant |
| 1555904_PM_at   | EST13        | EST13                                                                      | 0.000588685 | 1.39061  | On IS Tolerant up vs On IS Non-Tolerant   |
| 1569536_PM_at   | FLVCR2       | feline leukemia virus subgroup C cellular receptor family, member 2        | 0.000589324 | 1.3443   | On IS Tolerant up vs On IS Non-Tolerant   |
| 219700_PM_at    | PLXDC1       | plexin domain containing 1                                                 | 0.000590652 | -1.8347  | On IS Tolerant down vs On IS Non-Tolerant |
| 1555423_PM_at   | SSH2         | slingshot homolog 2 (Drosophila)                                           | 0.000594872 | 1.24597  | On IS Tolerant up vs On IS Non-Tolerant   |
| 1565595_PM_at   | EST14        | EST14                                                                      | 0.000595553 | -1.32062 | On IS Tolerant down vs On IS Non-Tolerant |
| 209298_PM_s_at  | ITSN1        | intersectin 1 (SH3 domain protein)                                         | 0.00060377  | 1.39283  | On IS Tolerant up vs On IS Non-Tolerant   |
| 223861_PM_at    | HORMAD1      | HORMA domain containing 1                                                  | 0.000611302 | 1.26907  | On IS Tolerant up vs On IS Non-Tolerant   |
| 208297_PM_s_at  | EVI5         | ecotropic viral integration site 5                                         | 0.000630121 | 1.88392  | On IS Tolerant up vs On IS Non-Tolerant   |
| 240948_PM_at    | EST15        | EST15                                                                      | 0.000658697 | 1.57919  | On IS Tolerant up vs On IS Non-Tolerant   |
| 213114_PM_at    | RER1         | RER1 retention in endoplasmic reticulum 1 homolog ( <i>S. cerevisiae</i> ) | 0.000678541 | 1.2064   | On IS Tolerant up vs On IS Non-Tolerant   |
| 225894_PM_at    | SYNPO2       | synaptopodin 2                                                             | 0.000700987 | 1.19306  | On IS Tolerant up vs On IS Non-Tolerant   |
| 204294_PM_at    | AMT          | aminomethyltransferase                                                     | 0.000701687 | -1.36968 | On IS Tolerant down vs On IS Non-Tolerant |
| 221525_PM_at    | ZMIZ2        | zinc finger, MIZ-type containing 2                                         | 0.00070273  | -1.28933 | On IS Tolerant down vs On IS Non-Tolerant |
| 218987_PM_at    | ATF7IP       | activating transcription factor 7 interacting protein                      | 0.000702833 | -1.4091  | On IS Tolerant down vs On IS Non-Tolerant |
| 207127_PM_s_at  | HNRNPH3      | heterogeneous nuclear ribonucleoprotein H3 (2H9)                           | 0.000703895 | -1.22404 | On IS Tolerant down vs On IS Non-Tolerant |
| 229249_PM_at    | EST16        | EST16                                                                      | 0.000708505 | 1.98304  | On IS Tolerant up vs On IS Non-Tolerant   |
| 220961_PM_s_at  | TBRG4        | transforming growth factor beta regulator 4                                | 0.000715442 | -1.55877 | On IS Tolerant down vs On IS Non-Tolerant |
| 232663_PM_s_at  | LOC390595    | ubiquitin-associated protein 1-like                                        | 0.000715964 | -1.28359 | On IS Tolerant down vs On IS Non-Tolerant |
| 235270_PM_at    | ZNF397       | zinc finger protein 397                                                    | 0.000721988 | 1.24294  | On IS Tolerant up vs On IS Non-Tolerant   |
| 1556042_PM_s_at | LOC338799    | hypothetical LOC338799                                                     | 0.000723125 | -1.47371 | On IS Tolerant down vs On IS Non-Tolerant |
| 209475_PM_at    | USP15        | ubiquitin specific peptidase 15                                            | 0.000759446 | 1.37254  | On IS Tolerant up vs On IS Non-Tolerant   |
| 214639_PM_s_at  | HOXA1        | homeobox A1                                                                | 0.000771701 | 1.43428  | On IS Tolerant up vs On IS Non-Tolerant   |
| 239410_PM_at    | EST17        | EST17                                                                      | 0.000778452 | 1.29741  | On IS Tolerant up vs On IS Non-Tolerant   |
| 236780_PM_at    | EST18        | EST18                                                                      | 0.000813586 | -1.25461 | On IS Tolerant down vs On IS Non-Tolerant |
| 224096_PM_at    | EST19        | EST19                                                                      | 0.000830343 | 1.24773  | On IS Tolerant up vs On IS Non-Tolerant   |
| 221756_PM_at    | PIK3IP1      | phosphoinositide-3-kinase interacting protein 1                            | 0.000847573 | -1.57604 | On IS Tolerant down vs On IS Non-Tolerant |
| 213839_PM_at    | CLMN         | calmin (calponin-like, transmembrane)                                      | 0.000849634 | 1.69481  | On IS Tolerant up vs On IS Non-Tolerant   |
| 235476_PM_at    | TRIM59       | tripartite motif-containing 59                                             | 0.000849744 | -1.69442 | On IS Tolerant down vs On IS Non-Tolerant |
| 211794_PM_at    | FYB          | FYN binding protein                                                        | 0.000866911 | 1.45704  | On IS Tolerant up vs On IS Non-Tolerant   |
| 203523_PM_at    | LSP1         | lymphocyte-specific protein 1                                              | 0.000868367 | 1.42663  | On IS Tolerant up vs On IS Non-Tolerant   |



|                 |                       |                                                                                            |             |          |                                           |
|-----------------|-----------------------|--------------------------------------------------------------------------------------------|-------------|----------|-------------------------------------------|
| 235217_PM_at    | LOC100216546          | hypothetical LOC100216546                                                                  | 0.000886259 | 1.25332  | On IS Tolerant up vs On IS Non-Tolerant   |
| 210724_PM_at    | EMR3                  | egf-like module containing, mucin-like, hormone receptor-like 3                            | 0.000892434 | 1.58314  | On IS Tolerant up vs On IS Non-Tolerant   |
| 236065_PM_at    | EST20                 | EST20                                                                                      | 0.000894488 | 1.70367  | On IS Tolerant up vs On IS Non-Tolerant   |
| 223068_PM_at    | EML4                  | echinoderm microtubule associated protein like 4                                           | 0.000899857 | -1.29613 | On IS Tolerant down vs On IS Non-Tolerant |
| 208189_PM_s_at  | MYO7A                 | myosin VIIA                                                                                | 0.000906878 | 1.3282   | On IS Tolerant up vs On IS Non-Tolerant   |
| 242313_PM_at    | LOC728730             | Hypothetical LOC728730                                                                     | 0.000911117 | -1.22693 | On IS Tolerant down vs On IS Non-Tolerant |
| 213559_PM_s_at  | ZNF467                | Zinc finger protein 467                                                                    | 0.000912929 | 1.20635  | On IS Tolerant up vs On IS Non-Tolerant   |
| 231399_PM_at    | RAB3IP                | RAB3A interacting protein (rabin3)                                                         | 0.000918641 | -1.31545 | On IS Tolerant down vs On IS Non-Tolerant |
| 214014_PM_at    | CDC42EP2              | CDC42 effector protein (Rho GTPase binding) 2                                              | 0.000920256 | 1.33056  | On IS Tolerant up vs On IS Non-Tolerant   |
| 1558467_PM_a_at | UGGT2                 | UDP-glucose glycoprotein glucosyltransferase 2                                             | 0.000920992 | 1.33829  | On IS Tolerant up vs On IS Non-Tolerant   |
| 226022_PM_at    | SASH1                 | SAM and SH3 domain containing 1                                                            | 0.000932098 | 2.01013  | On IS Tolerant up vs On IS Non-Tolerant   |
| 226425_PM_at    | CLIP4                 | CAP-GLY domain containing linker protein family, member 4                                  | 0.000943092 | 1.37648  | On IS Tolerant up vs On IS Non-Tolerant   |
| 213496_PM_at    | LPPR4                 | lipid phosphate phosphatase-related protein type 4                                         | 0.00094449  | 1.29768  | On IS Tolerant up vs On IS Non-Tolerant   |
| 219147_PM_s_at  | C9orf95               | chromosome 9 open reading frame 95                                                         | 0.00101489  | -1.64885 | On IS Tolerant down vs On IS Non-Tolerant |
| 225048_PM_at    | PHF10                 | PHD finger protein 10                                                                      | 0.00101887  | -1.56992 | On IS Tolerant down vs On IS Non-Tolerant |
| 244257_PM_at    | EST21                 | EST21                                                                                      | 0.00103066  | 1.91134  | On IS Tolerant up vs On IS Non-Tolerant   |
| 243376_PM_at    | EST22                 | EST22                                                                                      | 0.00103747  | 1.4226   | On IS Tolerant up vs On IS Non-Tolerant   |
| 222047_PM_s_at  | SRRT                  | serrate RNA effector molecule homolog (Arabidopsis)                                        | 0.00103974  | -1.22688 | On IS Tolerant down vs On IS Non-Tolerant |
| 203624_PM_at    | AKAP17A               | A kinase (PRKA) anchor protein 17A                                                         | 0.00106299  | -1.18807 | On IS Tolerant down vs On IS Non-Tolerant |
| 203079_PM_s_at  | CUL2                  | cullin 2                                                                                   | 0.00106372  | -1.22598 | On IS Tolerant down vs On IS Non-Tolerant |
| 228456_PM_s_at  | CDS2 ///<br>LOC149832 | CDP-diacylglycerol synthase (phosphatidate cytidyltransferase) 2 /// hypothetical pro      | 0.00106725  | -1.26389 | On IS Tolerant down vs On IS Non-Tolerant |
| 229250_PM_at    | TPCN2                 | two pore segment channel 2                                                                 | 0.00108121  | 1.49417  | On IS Tolerant up vs On IS Non-Tolerant   |
| 205212_PM_s_at  | ACAP1                 | ArfGAP with coiled-coil, ankyrin repeat and PH domains 1                                   | 0.00108198  | -1.39005 | On IS Tolerant down vs On IS Non-Tolerant |
| 227031_PM_at    | SNX13                 | sorting nexin 13                                                                           | 0.00108631  | 1.30041  | On IS Tolerant up vs On IS Non-Tolerant   |
| 1568853_PM_at   | EST23                 | EST23                                                                                      | 0.00110391  | -1.26018 | On IS Tolerant down vs On IS Non-Tolerant |
| 201104_PM_x_at  | NBPF1                 | neuroblastoma breakpoint family, member 1 ///<br>neuroblastoma breakpoint family, member 1 | 0.00112874  | -1.20748 | On IS Tolerant down vs On IS Non-Tolerant |
| 1556988_PM_s_at | CHD1L                 | chromodomain helicase DNA binding protein 1-like                                           | 0.00115701  | -1.29547 | On IS Tolerant down vs On IS Non-Tolerant |
| 213666_PM_at    | SEPT6                 | septin 6                                                                                   | 0.00118085  | -1.51174 | On IS Tolerant down vs On IS Non-Tolerant |

|                 |           |                                                                                         |            |          |                                           |
|-----------------|-----------|-----------------------------------------------------------------------------------------|------------|----------|-------------------------------------------|
| 215412_PM_x_at  | PMS2L2    | postmeiotic segregation increased 2-like 2 pseudogene                                   | 0.00118258 | -1.31559 | On IS Tolerant down vs On IS Non-Tolerant |
| 242043_PM_s_at  | EST24     | EST24                                                                                   | 0.00119548 | 1.25239  | On IS Tolerant up vs On IS Non-Tolerant   |
| 211196_PM_at    | DBT       | dihydrolipoamide branched chain transacylase E2                                         | 0.00119725 | 1.21804  | On IS Tolerant up vs On IS Non-Tolerant   |
| 210222_PM_s_at  | RTN1      | reticulon 1                                                                             | 0.00119973 | 1.53784  | On IS Tolerant up vs On IS Non-Tolerant   |
| 233302_PM_at    | EST25     | EST25                                                                                   | 0.00120789 | -2.05977 | On IS Tolerant down vs On IS Non-Tolerant |
| 232139_PM_s_at  | KIAA1919  | KIAA1919                                                                                | 0.0012192  | 1.32903  | On IS Tolerant up vs On IS Non-Tolerant   |
| 217742_PM_s_at  | WAC       | WW domain containing adaptor with coiled-coil                                           | 0.00129831 | -1.1266  | On IS Tolerant down vs On IS Non-Tolerant |
| 1562608_PM_at   | EST26     | EST26                                                                                   | 0.00131636 | 1.66286  | On IS Tolerant up vs On IS Non-Tolerant   |
| 225757_PM_s_at  | CLMN      | calmin (calponin-like, transmembrane)                                                   | 0.00136049 | 1.3782   | On IS Tolerant up vs On IS Non-Tolerant   |
| 1552798_PM_a_at | TLR4      | toll-like receptor 4                                                                    | 0.00140603 | 1.75359  | On IS Tolerant up vs On IS Non-Tolerant   |
| 242153_PM_at    | LARP1B    | La ribonucleoprotein domain family, member 1B                                           | 0.00142442 | 1.22858  | On IS Tolerant up vs On IS Non-Tolerant   |
| 200906_PM_s_at  | PALLD     | palladin, cytoskeletal associated protein                                               | 0.00142584 | 1.82569  | On IS Tolerant up vs On IS Non-Tolerant   |
| 233436_PM_at    | MTBP      | Mdm2, transformed 3T3 cell double minute 2, p53 binding protein (mouse) binding protein | 0.00143314 | -1.22021 | On IS Tolerant down vs On IS Non-Tolerant |
| 210835_PM_s_at  | CTBP2     | C-terminal binding protein 2                                                            | 0.00143928 | 1.35889  | On IS Tolerant up vs On IS Non-Tolerant   |
| 217550_PM_at    | ATF6      | activating transcription factor 6                                                       | 0.00144249 | 1.54486  | On IS Tolerant up vs On IS Non-Tolerant   |
| 237185_PM_at    | EST27     | EST27                                                                                   | 0.00147857 | -1.37403 | On IS Tolerant down vs On IS Non-Tolerant |
| 201779_PM_s_at  | RNF13     | ring finger protein 13                                                                  | 0.00147981 | 1.24367  | On IS Tolerant up vs On IS Non-Tolerant   |
| 231016_PM_s_at  | ARNT      | Aryl hydrocarbon receptor nuclear translocator                                          | 0.00149643 | 1.37476  | On IS Tolerant up vs On IS Non-Tolerant   |
| 1558915_PM_a_at | PEX14     | peroxisomal biogenesis factor 14                                                        | 0.00152911 | -1.26055 | On IS Tolerant down vs On IS Non-Tolerant |
| 227135_PM_at    | NAAA      | N-acyl ethanolamine acid amidase                                                        | 0.00153913 | 1.331    | On IS Tolerant up vs On IS Non-Tolerant   |
| 212539_PM_at    | CHD1L     | chromodomain helicase DNA binding protein 1-like                                        | 0.00154397 | -1.17291 | On IS Tolerant down vs On IS Non-Tolerant |
| 1570339_PM_x_at | EST28     | EST28                                                                                   | 0.00159313 | -1.29784 | On IS Tolerant down vs On IS Non-Tolerant |
| 208072_PM_s_at  | DGKD      | diacylglycerol kinase, delta 130kDa                                                     | 0.0016045  | -1.25521 | On IS Tolerant down vs On IS Non-Tolerant |
| 215768_PM_at    | EST29     | EST29                                                                                   | 0.0016629  | -1.64092 | On IS Tolerant down vs On IS Non-Tolerant |
| 217778_PM_at    | SLC39A1   | solute carrier family 39 (zinc transporter), member 1                                   | 0.00166394 | 1.33166  | On IS Tolerant up vs On IS Non-Tolerant   |
| 232677_PM_at    | EST30     | EST30                                                                                   | 0.00166781 | -1.33788 | On IS Tolerant down vs On IS Non-Tolerant |
| 212413_PM_at    | SEPT6     | septin 6                                                                                | 0.00173451 | -1.54118 | On IS Tolerant down vs On IS Non-Tolerant |
| 236423_PM_at    | EST31     | EST31                                                                                   | 0.00173975 | 1.35296  | On IS Tolerant up vs On IS Non-Tolerant   |
| 237753_PM_at    | IL21R     | interleukin 21 receptor                                                                 | 0.00175501 | -1.77149 | On IS Tolerant down vs On IS Non-Tolerant |
| 227887_PM_at    | LOC400236 | hypothetical LOC400236                                                                  | 0.00175505 | 1.30182  | On IS Tolerant up vs On IS Non-Tolerant   |
| 215639_PM_at    | SH2D3C    | SH2 domain containing 3C                                                                | 0.00177381 | 1.52392  | On IS Tolerant up vs On IS Non-Tolerant   |

|                 |           |                                                                                |            |          |                                           |
|-----------------|-----------|--------------------------------------------------------------------------------|------------|----------|-------------------------------------------|
| 212493_PM_s_at  | SETD2     | SET domain containing 2                                                        | 0.00180245 | -1.18007 | On IS Tolerant down vs On IS Non-Tolerant |
| 238129_PM_s_at  | EST32     | EST32                                                                          | 0.00183157 | 1.27486  | On IS Tolerant up vs On IS Non-Tolerant   |
| 214427_PM_at    | NOP2      | NOP2 nucleolar protein homolog (yeast)                                         | 0.00184734 | -1.24994 | On IS Tolerant down vs On IS Non-Tolerant |
| 226459_PM_at    | PIK3AP1   | phosphoinositide-3-kinase adaptor protein 1                                    | 0.00187723 | 1.27718  | On IS Tolerant up vs On IS Non-Tolerant   |
| 215767_PM_at    | ZNF804A   | zinc finger protein 804A                                                       | 0.0018853  | 1.28609  | On IS Tolerant up vs On IS Non-Tolerant   |
| 59697_PM_at     | RAB15     | RAB15, member RAS oncogene family                                              | 0.00188744 | -1.33639 | On IS Tolerant down vs On IS Non-Tolerant |
| 201189_PM_s_at  | ITPR3     | inositol 1,4,5-triphosphate receptor, type 3                                   | 0.00190103 | -1.53744 | On IS Tolerant down vs On IS Non-Tolerant |
| 203579_PM_s_at  | SLC7A6    | solute carrier family 7 (cationic amino acid transporter, y+ system), member 6 | 0.00190865 | -1.58014 | On IS Tolerant down vs On IS Non-Tolerant |
| 207437_PM_at    | NOVA1     | neuro-oncological ventral antigen 1                                            | 0.00191625 | -1.36418 | On IS Tolerant down vs On IS Non-Tolerant |
| 200629_PM_at    | WARS      | tryptophanyl-tRNA synthetase                                                   | 0.00192195 | 1.37924  | On IS Tolerant up vs On IS Non-Tolerant   |
| 40489_PM_at     | ATN1      | atrophin 1                                                                     | 0.00193353 | -1.16618 | On IS Tolerant down vs On IS Non-Tolerant |
| 233802_PM_at    | EST33     | EST33                                                                          | 0.00194704 | 1.20121  | On IS Tolerant up vs On IS Non-Tolerant   |
| 204495_PM_s_at  | C15orf39  | chromosome 15 open reading frame 39                                            | 0.00194945 | 1.48441  | On IS Tolerant up vs On IS Non-Tolerant   |
| 219759_PM_at    | ERAP2     | endoplasmic reticulum aminopeptidase 2                                         | 0.00197116 | -3.1383  | On IS Tolerant down vs On IS Non-Tolerant |
| 211965_PM_at    | ZFP36L1   | zinc finger protein 36, C3H type-like 1                                        | 0.00198174 | 1.74248  | On IS Tolerant up vs On IS Non-Tolerant   |
| 223781_PM_x_at  | ADH4      | alcohol dehydrogenase 4 (class II), pi polypeptide                             | 0.00198537 | -1.44872 | On IS Tolerant down vs On IS Non-Tolerant |
| 200754_PM_x_at  | SRSF2     | serine/arginine-rich splicing factor 2                                         | 0.00199277 | -1.1495  | On IS Tolerant down vs On IS Non-Tolerant |
| 225492_PM_at    | TMEM33    | transmembrane protein 33                                                       | 0.00199977 | 1.27502  | On IS Tolerant up vs On IS Non-Tolerant   |
| 212071_PM_s_at  | SPTBN1    | spectrin, beta, non-erythrocytic 1                                             | 0.00200735 | -1.48614 | On IS Tolerant down vs On IS Non-Tolerant |
| 207376_PM_at    | VENTX     | VENT homeobox homolog (Xenopus laevis)                                         | 0.00202649 | 1.38795  | On IS Tolerant up vs On IS Non-Tolerant   |
| 224550_PM_s_at  | MRV1      | murine retrovirus integration site 1 homolog                                   | 0.00202914 | 1.34921  | On IS Tolerant up vs On IS Non-Tolerant   |
| 1554699_PM_at   | L3MBTL4   | l(3)mbt-like 4 (Drosophila)                                                    | 0.00203729 | -1.19585 | On IS Tolerant down vs On IS Non-Tolerant |
| 208771_PM_s_at  | LTA4H     | leukotriene A4 hydrolase                                                       | 0.00205093 | 1.41068  | On IS Tolerant up vs On IS Non-Tolerant   |
| 1561362_PM_at   | EST34     | EST34                                                                          | 0.00205307 | -1.45492 | On IS Tolerant down vs On IS Non-Tolerant |
| 1555935_PM_s_at | HUNK      | hormonally up-regulated Neu-associated kinase                                  | 0.00208634 | -1.2227  | On IS Tolerant down vs On IS Non-Tolerant |
| 1557828_PM_a_at | C5orf28   | Chromosome 5 open reading frame 28                                             | 0.00209832 | -1.51242 | On IS Tolerant down vs On IS Non-Tolerant |
| 242010_PM_at    | LOC728475 | Hypothetical LOC728475                                                         | 0.00212837 | -1.23437 | On IS Tolerant down vs On IS Non-Tolerant |
| 212237_PM_at    | ASXL1     | additional sex combs like 1 (Drosophila)                                       | 0.00214421 | -1.28397 | On IS Tolerant down vs On IS Non-Tolerant |
| 1553062_PM_at   | MOGAT1    | monoacylglycerol O-acyltransferase 1                                           | 0.00215743 | -1.19455 | On IS Tolerant down vs On IS Non-Tolerant |
| 222115_PM_x_at  | GLYR1     | glyoxylate reductase 1 homolog (Arabidopsis)                                   | 0.00216975 | -1.22254 | On IS Tolerant down vs On IS Non-Tolerant |
| 228074_PM_at    | ITPRIPL2  | inositol 1,4,5-triphosphate receptor interacting protein-like 2                | 0.00217804 | 1.28679  | On IS Tolerant up vs On IS Non-Tolerant   |
| 228416_PM_at    | ACVR2A    | activin A receptor, type IIA                                                   | 0.00217908 | 1.61181  | On IS Tolerant up vs On IS Non-Tolerant   |
| 210290_PM_at    | ZNF174    | zinc finger protein 174                                                        | 0.00218648 | 1.31878  | On IS Tolerant up vs On IS Non-Tolerant   |
| 215761_PM_at    | DMXL2     | Dmx-like 2                                                                     | 0.00219184 | 1.9666   | On IS Tolerant up vs On IS Non-Tolerant   |
| 200912_PM_s_at  | EIF4A2    | eukaryotic translation initiation factor 4A2                                   | 0.0022248  | -1.13546 | On IS Tolerant down vs On IS Non-Tolerant |

|                 |              |                                                                 |            |          |                                           |
|-----------------|--------------|-----------------------------------------------------------------|------------|----------|-------------------------------------------|
| 231697_PM_s_at  | EST35        | EST35                                                           | 0.00222841 | 1.81824  | On IS Tolerant up vs On IS Non-Tolerant   |
| 232559_PM_at    | EST36        | EST36                                                           | 0.00225354 | 1.28065  | On IS Tolerant up vs On IS Non-Tolerant   |
| 218221_PM_at    | ARNT         | aryl hydrocarbon receptor nuclear translocator                  | 0.00227767 | 1.51095  | On IS Tolerant up vs On IS Non-Tolerant   |
| 228383_PM_at    | PNPLA7       | patatin-like phospholipase domain containing 7                  | 0.00227948 | -1.22634 | On IS Tolerant down vs On IS Non-Tolerant |
| 219236_PM_at    | PAQR6        | progesterone and adipoQ receptor family member VI               | 0.00230997 | 1.3238   | On IS Tolerant up vs On IS Non-Tolerant   |
| 227914_PM_s_at  | UBE3B        | Ubiquitin protein ligase E3B                                    | 0.00232015 | -1.18859 | On IS Tolerant down vs On IS Non-Tolerant |
| 242300_PM_at    | EST37        | EST37                                                           | 0.00233675 | 1.73507  | On IS Tolerant up vs On IS Non-Tolerant   |
| 229982_PM_at    | QSER1        | glutamine and serine rich 1                                     | 0.00233725 | 1.53444  | On IS Tolerant up vs On IS Non-Tolerant   |
| 229872_PM_s_at  | LOC100132999 | hypothetical LOC100132999                                       | 0.00235444 | -1.41787 | On IS Tolerant down vs On IS Non-Tolerant |
| 48580_PM_at     | CXXC1        | CXXC finger protein 1                                           | 0.00239271 | -1.20364 | On IS Tolerant down vs On IS Non-Tolerant |
| 244387_PM_at    | EST38        | EST38                                                           | 0.00246984 | -1.68632 | On IS Tolerant down vs On IS Non-Tolerant |
| 229107_PM_at    | EST39        | EST39                                                           | 0.0024877  | 1.34194  | On IS Tolerant up vs On IS Non-Tolerant   |
| 243745_PM_at    | EST40        | EST40                                                           | 0.00254038 | 1.61364  | On IS Tolerant up vs On IS Non-Tolerant   |
| 241947_PM_at    | LOC100233209 | hypothetical LOC100233209                                       | 0.00254549 | -1.41765 | On IS Tolerant down vs On IS Non-Tolerant |
| 236333_PM_at    | EST41        | EST41                                                           | 0.00255429 | -1.25424 | On IS Tolerant down vs On IS Non-Tolerant |
| 236094_PM_at    | TCF7L2       | Transcription factor 7-like 2 (T-cell specific, HMG-box)        | 0.00256728 | 1.7151   | On IS Tolerant up vs On IS Non-Tolerant   |
| 243252_PM_at    | EST42        | EST42                                                           | 0.00259076 | 1.30293  | On IS Tolerant up vs On IS Non-Tolerant   |
| 233274_PM_at    | EST43        | EST43                                                           | 0.00259721 | -1.3407  | On IS Tolerant down vs On IS Non-Tolerant |
| 227560_PM_at    | SFXN2        | sideroflexin 2                                                  | 0.00260328 | -1.3503  | On IS Tolerant down vs On IS Non-Tolerant |
| 220635_PM_at    | PSORS1C2     | psoriasis susceptibility 1 candidate 2                          | 0.00261215 | -1.20083 | On IS Tolerant down vs On IS Non-Tolerant |
| 242251_PM_at    | SPATA5       | spermatogenesis associated 5                                    | 0.00262049 | 1.20862  | On IS Tolerant up vs On IS Non-Tolerant   |
| 227954_PM_at    | ITPRIPL2     | inositol 1,4,5-triphosphate receptor interacting protein-like 2 | 0.00263318 | 1.5184   | On IS Tolerant up vs On IS Non-Tolerant   |
| 241344_PM_at    | EST44        | EST44                                                           | 0.00264155 | 1.48611  | On IS Tolerant up vs On IS Non-Tolerant   |
| 1561219_PM_x_at | EST45        | EST45                                                           | 0.00265218 | -1.24311 | On IS Tolerant down vs On IS Non-Tolerant |
| 239726_PM_at    | EST46        | EST46                                                           | 0.00265487 | -1.77307 | On IS Tolerant down vs On IS Non-Tolerant |
| 223597_PM_at    | ITLN1        | intelectin 1 (galactofuranose binding)                          | 0.0026747  | 1.49148  | On IS Tolerant up vs On IS Non-Tolerant   |
| 201674_PM_s_at  | AKAP1        | A kinase (PRKA) anchor protein 1                                | 0.00268192 | -1.26978 | On IS Tolerant down vs On IS Non-Tolerant |
| 216456_PM_at    | EST47        | EST47                                                           | 0.0026893  | -1.18567 | On IS Tolerant down vs On IS Non-Tolerant |
| 223683_PM_at    | ZMYND15      | zinc finger, MYND-type containing 15                            | 0.00269335 | 1.18532  | On IS Tolerant up vs On IS Non-Tolerant   |
| 236436_PM_at    | SLC25A45     | solute carrier family 25, member 45                             | 0.00270521 | -1.38228 | On IS Tolerant down vs On IS Non-Tolerant |
| 227995_PM_at    | EST48        | EST48                                                           | 0.00271781 | 1.58513  | On IS Tolerant up vs On IS Non-Tolerant   |
| 205213_PM_at    | ACAP1        | ArfGAP with coiled-coil, ankyrin repeat and PH domains 1        | 0.00273966 | -1.39633 | On IS Tolerant down vs On IS Non-Tolerant |
| 229121_PM_at    | CMKLR1       | chemokine-like receptor 1                                       | 0.00275632 | 1.56878  | On IS Tolerant up vs On IS Non-Tolerant   |
| 219101_PM_x_at  | ABHD8        | abhydrolase domain containing 8                                 | 0.00280451 | 1.18604  | On IS Tolerant up vs On IS Non-Tolerant   |
| 231886_PM_at    | LOC100134822 | similar to hCG1739109                                           | 0.00282332 | -1.42326 | On IS Tolerant down vs On IS Non-Tolerant |

|                 |          |                                                                         |            |          |                                           |
|-----------------|----------|-------------------------------------------------------------------------|------------|----------|-------------------------------------------|
| 237875_PM_at    | EST49    | EST49                                                                   | 0.00284072 | 1.76982  | On IS Tolerant up vs On IS Non-Tolerant   |
| 1552554_PM_a_at | NLRC4    | NLR family, CARD domain containing 4                                    | 0.00285608 | 1.20661  | On IS Tolerant up vs On IS Non-Tolerant   |
| 240409_PM_at    | SUGT1P3  | suppressor of G2 allele of SKP1 ( <i>S. cerevisiae</i> ) pseudogene 3   | 0.00286706 | 1.18303  | On IS Tolerant up vs On IS Non-Tolerant   |
| 200790_PM_at    | ODC1     | ornithine decarboxylase 1                                               | 0.00288849 | -1.34396 | On IS Tolerant down vs On IS Non-Tolerant |
| 1554539_PM_a_at | RHOF     | ras homolog gene family, member F (in filopodia)                        | 0.00289524 | -1.46999 | On IS Tolerant down vs On IS Non-Tolerant |
| 1556352_PM_at   | EST50    | EST50                                                                   | 0.0028957  | 1.77301  | On IS Tolerant up vs On IS Non-Tolerant   |
| 227353_PM_at    | TMC8     | transmembrane channel-like 8                                            | 0.00290816 | -1.372   | On IS Tolerant down vs On IS Non-Tolerant |
| 203207_PM_s_at  | MTFR1    | mitochondrial fission regulator 1                                       | 0.00292124 | 1.3195   | On IS Tolerant up vs On IS Non-Tolerant   |
| 210110_PM_x_at  | HNRNPH3  | heterogeneous nuclear ribonucleoprotein H3 (2H9)                        | 0.0029254  | -1.21223 | On IS Tolerant down vs On IS Non-Tolerant |
| 228933_PM_at    | NHS      | Nance-Horan syndrome (congenital cataracts and dental anomalies)        | 0.00293318 | 1.59129  | On IS Tolerant up vs On IS Non-Tolerant   |
| 225919_PM_s_at  | C9orf72  | chromosome 9 open reading frame 72                                      | 0.00293522 | 1.36868  | On IS Tolerant up vs On IS Non-Tolerant   |
| 221959_PM_at    | FAM110B  | family with sequence similarity 110, member B                           | 0.00294605 | 1.38993  | On IS Tolerant up vs On IS Non-Tolerant   |
| 237071_PM_at    | EST51    | EST51                                                                   | 0.00295553 | 1.36412  | On IS Tolerant up vs On IS Non-Tolerant   |
| 215592_PM_at    | EST52    | EST52                                                                   | 0.00295984 | -1.65004 | On IS Tolerant down vs On IS Non-Tolerant |
| 203385_PM_at    | DGKA     | diacylglycerol kinase, alpha 80kDa                                      | 0.00300376 | -1.70733 | On IS Tolerant down vs On IS Non-Tolerant |
| 226139_PM_at    | CCDC149  | coiled-coil domain containing 149                                       | 0.00302609 | 1.52857  | On IS Tolerant up vs On IS Non-Tolerant   |
| 229199_PM_at    | SCN9A    | sodium channel, voltage-gated, type IX, alpha subunit                   | 0.00304159 | 1.1841   | On IS Tolerant up vs On IS Non-Tolerant   |
| 202377_PM_at    | LEPROT   | leptin receptor overlapping transcript                                  | 0.00304169 | 1.379    | On IS Tolerant up vs On IS Non-Tolerant   |
| 241193_PM_at    | ETS2     | V-ets erythroblastosis virus E26 oncogene homolog 2 (avian)             | 0.0030814  | 1.53998  | On IS Tolerant up vs On IS Non-Tolerant   |
| 1568870_PM_at   | SLC24A4  | solute carrier family 24 (sodium/potassium/calcium exchanger), member 4 | 0.00308654 | 1.41378  | On IS Tolerant up vs On IS Non-Tolerant   |
| 239056_PM_at    | SEC22C   | SEC22 vesicle trafficking protein homolog C ( <i>S. cerevisiae</i> )    | 0.00308776 | -1.21172 | On IS Tolerant down vs On IS Non-Tolerant |
| 242065_PM_x_at  | IDI1     | isopentenyl-diphosphate delta isomerase 1                               | 0.00309166 | -1.29549 | On IS Tolerant down vs On IS Non-Tolerant |
| 1558466_PM_at   | UGGT2    | UDP-glucose glycoprotein glucosyltransferase 2                          | 0.00310115 | 1.2547   | On IS Tolerant up vs On IS Non-Tolerant   |
| 229648_PM_at    | ARHGAP32 | Rho GTPase activating protein 32                                        | 0.00313615 | 1.38564  | On IS Tolerant up vs On IS Non-Tolerant   |
| 1555926_PM_a_at | EST53    | EST53                                                                   | 0.00315967 | -1.41154 | On IS Tolerant down vs On IS Non-Tolerant |
| 225715_PM_at    | RPTOR    | regulatory associated protein of MTOR, complex 1                        | 0.00316758 | -1.20511 | On IS Tolerant down vs On IS Non-Tolerant |
| 224931_PM_at    | SLC41A3  | solute carrier family 41, member 3                                      | 0.00317208 | -1.31993 | On IS Tolerant down vs On IS Non-Tolerant |

|                 |              |                                                             |            |          |                                           |
|-----------------|--------------|-------------------------------------------------------------|------------|----------|-------------------------------------------|
| 212356_PM_at    | KHNYN        | KH and NYN domain containing                                | 0.003211   | -1.24526 | On IS Tolerant down vs On IS Non-Tolerant |
| 236553_PM_at    | LOC100508546 | hypothetical LOC100508546                                   | 0.0032124  | 1.32901  | On IS Tolerant up vs On IS Non-Tolerant   |
| 218301_PM_at    | RNPEPL1      | arginyl aminopeptidase (aminopeptidase B)-like 1            | 0.00322018 | 1.28849  | On IS Tolerant up vs On IS Non-Tolerant   |
| 227808_PM_at    | DNAJC15      | DnaJ (Hsp40) homolog, subfamily C, member 15                | 0.00326096 | 1.60316  | On IS Tolerant up vs On IS Non-Tolerant   |
| 221042_PM_s_at  | CLMN         | calmin (calponin-like, transmembrane)                       | 0.0032653  | 1.5875   | On IS Tolerant up vs On IS Non-Tolerant   |
| 220295_PM_x_at  | DEPDC1       | DEP domain containing 1                                     | 0.00331586 | -1.26908 | On IS Tolerant down vs On IS Non-Tolerant |
| 205872_PM_x_at  | PDE4DIP      | Phosphodiesterase 4D interacting protein                    | 0.00334855 | -1.37734 | On IS Tolerant down vs On IS Non-Tolerant |
| 203965_PM_at    | USP20        | ubiquitin specific peptidase 20                             | 0.00338997 | -1.31624 | On IS Tolerant down vs On IS Non-Tolerant |
| 238458_PM_at    | EFHA2        | EF-hand domain family, member A2                            | 0.00344166 | 1.29499  | On IS Tolerant up vs On IS Non-Tolerant   |
| 1562896_PM_at   | TNRC18       | trinucleotide repeat containing 18                          | 0.00346386 | -1.27932 | On IS Tolerant down vs On IS Non-Tolerant |
| 208714_PM_at    | NDUFV1       | NADH dehydrogenase (ubiquinone) flavoprotein 1, 51kDa       | 0.00346914 | -1.20789 | On IS Tolerant down vs On IS Non-Tolerant |
| 231780_PM_at    | GBGT1        | globoside alpha-1,3-N-acetylgalactosaminyltransferase 1     | 0.00347997 | 1.45787  | On IS Tolerant up vs On IS Non-Tolerant   |
| 234946_PM_at    | ENTPD6       | ectonucleoside triphosphate diphosphohydrolase 6 (putative) | 0.00348432 | 1.19655  | On IS Tolerant up vs On IS Non-Tolerant   |
| 1559066_PM_at   | EST54        | EST54                                                       | 0.00354712 | 1.30899  | On IS Tolerant up vs On IS Non-Tolerant   |
| 201294_PM_s_at  | WSB1         | WD repeat and SOCS box-containing 1                         | 0.00355145 | 1.91381  | On IS Tolerant up vs On IS Non-Tolerant   |
| 203057_PM_s_at  | PRDM2        | PR domain containing 2, with ZNF domain                     | 0.00356456 | -1.24264 | On IS Tolerant down vs On IS Non-Tolerant |
| 239152_PM_at    | EST55        | EST55                                                       | 0.00357356 | 1.33634  | On IS Tolerant up vs On IS Non-Tolerant   |
| 243074_PM_at    | EST56        | EST56                                                       | 0.00361393 | 1.24063  | On IS Tolerant up vs On IS Non-Tolerant   |
| 1564274_PM_at   | C9orf47      | chromosome 9 open reading frame 47                          | 0.00362489 | 1.46301  | On IS Tolerant up vs On IS Non-Tolerant   |
| 218754_PM_at    | NOL9         | nucleolar protein 9                                         | 0.00367963 | -1.29662 | On IS Tolerant down vs On IS Non-Tolerant |
| 211168_PM_s_at  | UPF1         | UPF1 regulator of nonsense transcripts homolog (yeast)      | 0.00368393 | -1.249   | On IS Tolerant down vs On IS Non-Tolerant |
| 244519_PM_at    | ASXL1        | additional sex combs like 1 (Drosophila)                    | 0.00371844 | -1.41294 | On IS Tolerant down vs On IS Non-Tolerant |
| 218552_PM_at    | ECHDC2       | enoyl CoA hydratase domain containing 2                     | 0.00372183 | -1.37749 | On IS Tolerant down vs On IS Non-Tolerant |
| 201480_PM_s_at  | SUPT5H       | suppressor of Ty 5 homolog (S. cerevisiae)                  | 0.00375259 | -1.20813 | On IS Tolerant down vs On IS Non-Tolerant |
| 212242_PM_at    | TUBA4A       | tubulin, alpha 4a                                           | 0.00377324 | -1.48644 | On IS Tolerant down vs On IS Non-Tolerant |
| 234956_PM_at    | LOC93444     | hypothetical protein LOC93444                               | 0.00377377 | 1.19576  | On IS Tolerant up vs On IS Non-Tolerant   |
| 227039_PM_at    | AKAP13       | A kinase (PRKA) anchor protein 13                           | 0.00378162 | 1.67459  | On IS Tolerant up vs On IS Non-Tolerant   |
| 242281_PM_at    | GLUL         | glutamate-ammonia ligase                                    | 0.00380178 | 1.41444  | On IS Tolerant up vs On IS Non-Tolerant   |
| 211900_PM_x_at  | CD6          | CD6 molecule                                                | 0.00382697 | -1.3527  | On IS Tolerant down vs On IS Non-Tolerant |
| 235104_PM_at    | ERAP2        | endoplasmic reticulum aminopeptidase 2                      | 0.0038389  | -2.55664 | On IS Tolerant down vs On IS Non-Tolerant |
| 1563052_PM_at   | EST57        | EST57                                                       | 0.00384276 | -1.22881 | On IS Tolerant down vs On IS Non-Tolerant |
| 1568287_PM_at   | HMGA2        | high mobility group AT-hook 2                               | 0.00386772 | -1.23524 | On IS Tolerant down vs On IS Non-Tolerant |
| 1555483_PM_x_at | FBLIM1       | filamin binding LIM protein 1                               | 0.00387694 | 1.19728  | On IS Tolerant up vs On IS Non-Tolerant   |
| 244332_PM_at    | EST58        | EST58                                                       | 0.00390468 | 2.08715  | On IS Tolerant up vs On IS Non-Tolerant   |

|                 |                                  |                                                                                            |            |          |                                           |
|-----------------|----------------------------------|--------------------------------------------------------------------------------------------|------------|----------|-------------------------------------------|
| 215160_PM_x_at  | LOC100509419 ///<br>LOC100510581 | protein FRG1B-like /// protein FRG1-like /// FSHD<br>region gene 1 pseudogene              | 0.00390841 | -1.26615 | On IS Tolerant down vs On IS Non-Tolerant |
| 221206_PM_at    | PMS2 /// PMS2CL                  | PMS2 postmeiotic segregation increased 2 (S.<br>cerevisiae) /// PMS2 C-terminal like pseud | 0.00392803 | -1.33611 | On IS Tolerant down vs On IS Non-Tolerant |
| 240690_PM_at    | EST59                            | EST59                                                                                      | 0.00395126 | -1.5268  | On IS Tolerant down vs On IS Non-Tolerant |
| 242438_PM_at    | ASXL1                            | additional sex combs like 1 (Drosophila)                                                   | 0.00397087 | -1.43355 | On IS Tolerant down vs On IS Non-Tolerant |
| 1554172_PM_a_at | ZMYM3                            | zinc finger, MYM-type 3                                                                    | 0.00397139 | 1.26666  | On IS Tolerant up vs On IS Non-Tolerant   |
| 225589_PM_at    | SH3RF1                           | SH3 domain containing ring finger 1                                                        | 0.00400516 | 1.30299  | On IS Tolerant up vs On IS Non-Tolerant   |
| 237999_PM_at    | EST60                            | EST60                                                                                      | 0.00403405 | 1.26559  | On IS Tolerant up vs On IS Non-Tolerant   |
| 208438_PM_s_at  | FGR                              | Gardner-Rasheed feline sarcoma viral (v-fgr)<br>oncogene homolog                           | 0.00404401 | 1.20218  | On IS Tolerant up vs On IS Non-Tolerant   |
| 213633_PM_at    | SH3BP1                           | SH3-domain binding protein 1                                                               | 0.0041111  | 1.20522  | On IS Tolerant up vs On IS Non-Tolerant   |
| 207522_PM_s_at  | ATP2A3                           | ATPase, Ca++ transporting, ubiquitous                                                      | 0.00412561 | -1.39862 | On IS Tolerant down vs On IS Non-Tolerant |
| 217902_PM_s_at  | HERC2                            | hect domain and RLD 2                                                                      | 0.00414944 | -1.38676 | On IS Tolerant down vs On IS Non-Tolerant |
| 242738_PM_s_at  | ZFH3                             | zinc finger homeobox 3                                                                     | 0.00418444 | 1.48848  | On IS Tolerant up vs On IS Non-Tolerant   |
| 236587_PM_at    | EST61                            | EST61                                                                                      | 0.00419638 | 1.29313  | On IS Tolerant up vs On IS Non-Tolerant   |
| 203104_PM_at    | CSF1R                            | colony stimulating factor 1 receptor                                                       | 0.00419795 | 1.41888  | On IS Tolerant up vs On IS Non-Tolerant   |
| 227556_PM_at    | NME7                             | non-metastatic cells 7, protein expressed in<br>(nucleoside-diphosphate kinase)            | 0.00421366 | 1.30164  | On IS Tolerant up vs On IS Non-Tolerant   |
| 206688_PM_s_at  | CPSF4                            | cleavage and polyadenylation specific factor 4,<br>30kDa                                   | 0.00421378 | -1.15316 | On IS Tolerant down vs On IS Non-Tolerant |
| 223161_PM_at    | KIAA1147                         | KIAA1147                                                                                   | 0.00423006 | -1.44995 | On IS Tolerant down vs On IS Non-Tolerant |
| 237289_PM_at    | CREB1                            | cAMP responsive element binding protein 1                                                  | 0.00423123 | 1.37414  | On IS Tolerant up vs On IS Non-Tolerant   |
| 204555_PM_s_at  | PPP1R3D                          | protein phosphatase 1, regulatory (inhibitor)<br>subunit 3D                                | 0.00423255 | 1.30068  | On IS Tolerant up vs On IS Non-Tolerant   |
| 200907_PM_s_at  | PALLD                            | palladin, cytoskeletal associated protein                                                  | 0.00423696 | 1.84596  | On IS Tolerant up vs On IS Non-Tolerant   |
| 228035_PM_at    | STK33                            | serine/threonine kinase 33                                                                 | 0.00425031 | 1.22147  | On IS Tolerant up vs On IS Non-Tolerant   |
| 216277_PM_at    | BUB1                             | budding uninhibited by benzimidazoles 1 homolog<br>(yeast)                                 | 0.0042594  | -1.31203 | On IS Tolerant down vs On IS Non-Tolerant |
| 229390_PM_at    | FAM26F                           | family with sequence similarity 26, member F                                               | 0.00427031 | 1.57764  | On IS Tolerant up vs On IS Non-Tolerant   |
| 229934_PM_at    | EST62                            | EST62                                                                                      | 0.00428277 | 1.67347  | On IS Tolerant up vs On IS Non-Tolerant   |
| 200773_PM_x_at  | PTMA                             | prothymosin, alpha                                                                         | 0.00431661 | -1.06421 | On IS Tolerant down vs On IS Non-Tolerant |
| 237897_PM_at    | LOC100506357                     | hypothetical LOC100506357                                                                  | 0.00432202 | 1.25347  | On IS Tolerant up vs On IS Non-Tolerant   |
| 204526_PM_s_at  | TBC1D8                           | TBC1 domain family, member 8 (with GRAM<br>domain)                                         | 0.004361   | 1.49598  | On IS Tolerant up vs On IS Non-Tolerant   |
| 214756_PM_x_at  | PMS2P1                           | postmeiotic segregation increased 2 pseudogene 1                                           | 0.00437912 | -1.2336  | On IS Tolerant down vs On IS Non-Tolerant |

|                  |           |                                                                                        |            |          |                                           |
|------------------|-----------|----------------------------------------------------------------------------------------|------------|----------|-------------------------------------------|
| 235551_PM_at     | WDR4      | WD repeat domain 4                                                                     | 0.00438533 | -1.18742 | On IS Tolerant down vs On IS Non-Tolerant |
| 229577_PM_at     | AGPAT6    | 1-acylglycerol-3-phosphate O-acyltransferase 6 (lysophosphatidic acid acyltransferase, | 0.00438765 | -1.29812 | On IS Tolerant down vs On IS Non-Tolerant |
| 229185_PM_at     | LIFR      | leukemia inhibitory factor receptor alpha                                              | 0.00442125 | -1.17233 | On IS Tolerant down vs On IS Non-Tolerant |
| 236769_PM_at     | LOC158402 | hypothetical protein LOC158402                                                         | 0.00444098 | 1.56916  | On IS Tolerant up vs On IS Non-Tolerant   |
| 243184_PM_at     | EST63     | EST63                                                                                  | 0.00445752 | -1.30515 | On IS Tolerant down vs On IS Non-Tolerant |
| 216387_PM_x_at   | EST64     | EST64                                                                                  | 0.00447168 | -1.19728 | On IS Tolerant down vs On IS Non-Tolerant |
| 214494_PM_s_at   | SPG7      | spastic paraplegia 7 (pure and complicated autosomal recessive)                        | 0.00447169 | -1.24021 | On IS Tolerant down vs On IS Non-Tolerant |
| 200941_PM_at     | HSBP1     | heat shock factor binding protein 1                                                    | 0.00448945 | 1.32216  | On IS Tolerant up vs On IS Non-Tolerant   |
| 225283_PM_at     | ARRDC4    | arrestin domain containing 4                                                           | 0.00452094 | 1.64899  | On IS Tolerant up vs On IS Non-Tolerant   |
| 209367_PM_at     | STXBP2    | syntaxin binding protein 2                                                             | 0.00452815 | 1.44942  | On IS Tolerant up vs On IS Non-Tolerant   |
| 206015_PM_s_at   | FOXJ3     | forkhead box J3                                                                        | 0.00454188 | -1.1543  | On IS Tolerant down vs On IS Non-Tolerant |
| 220162_PM_s_at   | CARD9     | caspase recruitment domain family, member 9                                            | 0.00458944 | 1.3428   | On IS Tolerant up vs On IS Non-Tolerant   |
| 242644_PM_at     | TMC8      | transmembrane channel-like 8                                                           | 0.00459163 | -1.46446 | On IS Tolerant down vs On IS Non-Tolerant |
| 228134_PM_at     | MYH11     | myosin, heavy chain 11, smooth muscle                                                  | 0.00460873 | 1.24445  | On IS Tolerant up vs On IS Non-Tolerant   |
| 1569190_PM_at    | SCLT1     | sodium channel and clathrin linker 1                                                   | 0.00461537 | 1.3111   | On IS Tolerant up vs On IS Non-Tolerant   |
| 242642_PM_at     | EST65     | EST65                                                                                  | 0.0046268  | 1.8329   | On IS Tolerant up vs On IS Non-Tolerant   |
| 213958_PM_at     | CD6       | CD6 molecule                                                                           | 0.00462902 | -1.58856 | On IS Tolerant down vs On IS Non-Tolerant |
| 222462_PM_s_at   | BACE1     | beta-site APP-cleaving enzyme 1                                                        | 0.00465233 | 1.27502  | On IS Tolerant up vs On IS Non-Tolerant   |
| 227784_PM_s_at   | COG1      | component of oligomeric golgi complex 1                                                | 0.00465357 | -1.36633 | On IS Tolerant down vs On IS Non-Tolerant |
| 234291_PM_s_at   | SLC6A20   | solute carrier family 6 (proline IMINO transporter), member 20                         | 0.00465989 | 1.18559  | On IS Tolerant up vs On IS Non-Tolerant   |
| 219419_PM_at     | RBFA      | ribosome binding factor A (putative)                                                   | 0.00466205 | -1.26701 | On IS Tolerant down vs On IS Non-Tolerant |
| 219491_PM_at     | LRFN4     | leucine rich repeat and fibronectin type III domain containing 4                       | 0.00467369 | -1.23307 | On IS Tolerant down vs On IS Non-Tolerant |
| 238893_PM_at     | LOC338758 | hypothetical LOC338758                                                                 | 0.00469078 | 1.54663  | On IS Tolerant up vs On IS Non-Tolerant   |
| 220742_PM_s_at   | NGLY1     | N-glycanase 1                                                                          | 0.00471374 | -1.17751 | On IS Tolerant down vs On IS Non-Tolerant |
| 228065_PM_at     | BCL9L     | B-cell CLL/lymphoma 9-like                                                             | 0.00473648 | -1.32791 | On IS Tolerant down vs On IS Non-Tolerant |
| 218081_PM_at     | C20orf27  | chromosome 20 open reading frame 27                                                    | 0.00475848 | 1.35686  | On IS Tolerant up vs On IS Non-Tolerant   |
| 207124_PM_s_at   | GNB5      | guanine nucleotide binding protein (G protein), beta 5                                 | 0.00476752 | -1.73309 | On IS Tolerant down vs On IS Non-Tolerant |
| 210291_PM_s_at   | ZNF174    | zinc finger protein 174                                                                | 0.0047694  | 1.21057  | On IS Tolerant up vs On IS Non-Tolerant   |
| 226507_PM_at     | PAK1      | p21 protein (Cdc42/Rac)-activated kinase 1                                             | 0.00478424 | 1.28895  | On IS Tolerant up vs On IS Non-Tolerant   |
| AFFX-M27830_5_at | EST66     | EST66                                                                                  | 0.00478721 | 1.39178  | On IS Tolerant up vs On IS Non-Tolerant   |
| 238420_PM_at     | EST67     | EST67                                                                                  | 0.00481317 | 1.25407  | On IS Tolerant up vs On IS Non-Tolerant   |
| 1563561_PM_at    | EST68     | EST68                                                                                  | 0.0048135  | -1.22644 | On IS Tolerant down vs On IS Non-Tolerant |



|                 |          |                                                                  |            |          |                                           |
|-----------------|----------|------------------------------------------------------------------|------------|----------|-------------------------------------------|
| 232586_PM_x_at  | OR7E126P | olfactory receptor, family 7, subfamily E, member 126 pseudogene | 0.00482729 | -1.40478 | On IS Tolerant down vs On IS Non-Tolerant |
| 236479_PM_at    | EST69    | EST69                                                            | 0.00484227 | 1.18692  | On IS Tolerant up vs On IS Non-Tolerant   |
| 240669_PM_at    | EST70    | EST70                                                            | 0.00485805 | 1.17443  | On IS Tolerant up vs On IS Non-Tolerant   |
| 222364_PM_at    | SLC44A1  | solute carrier family 44, member 1                               | 0.00487515 | 1.30372  | On IS Tolerant up vs On IS Non-Tolerant   |
| 217388_PM_s_at  | KYNU     | kynureninase (L-kynurenine hydrolase)                            | 0.00488716 | 1.45332  | On IS Tolerant up vs On IS Non-Tolerant   |
| 1554202_PM_x_at | CABP4    | calcium binding protein 4                                        | 0.0048902  | -1.26397 | On IS Tolerant down vs On IS Non-Tolerant |
| 200653_PM_s_at  | CALM1    | calmodulin 1 (phosphorylase kinase, delta)                       | 0.00491521 | -1.16274 | On IS Tolerant down vs On IS Non-Tolerant |
| 238156_PM_at    | EST71    | EST71                                                            | 0.0049249  | -1.3093  | On IS Tolerant down vs On IS Non-Tolerant |
| 226744_PM_at    | METT10D  | methyltransferase 10 domain containing                           | 0.00496597 | -1.26753 | On IS Tolerant down vs On IS Non-Tolerant |
| 220237_PM_at    | ATG3     | ATG3 autophagy related 3 homolog (S. cerevisiae)                 | 0.00496686 | 1.19935  | On IS Tolerant up vs On IS Non-Tolerant   |
| 203233_PM_at    | IL4R     | interleukin 4 receptor                                           | 0.00497315 | -1.4476  | On IS Tolerant down vs On IS Non-Tolerant |
| 233039_PM_at    | EST72    | EST72                                                            | 0.00497467 | 1.25106  | On IS Tolerant up vs On IS Non-Tolerant   |
| 207960_PM_at    | EST73    | EST73                                                            | 0.00498587 | 1.19785  | On IS Tolerant up vs On IS Non-Tolerant   |
| 222303_PM_at    | EST74    | EST74                                                            | 0.00499596 | 1.80157  | On IS Tolerant up vs On IS Non-Tolerant   |

**Supplementary Table S5: 3526 Healthy Controls vs Tolerant Unique Genes (1st 2 Years off IS)**

| <b>Probeset ID</b> | <b>Gene Symbol</b> | <b>Gene Title</b>                                                          | <b>p-value (Normal vs. Off IS Tolerant)</b> | <b>Fold-Change (Normal vs. Off IS Tolerant)</b> | <b>Fold-Change(Normal vs. Off IS Tolerant) (Description)</b> |
|--------------------|--------------------|----------------------------------------------------------------------------|---------------------------------------------|-------------------------------------------------|--------------------------------------------------------------|
| 228727_PM_at       | ANXA11             | annexin A11                                                                | 3.37E-08                                    | 1.92                                            | Normal up vs Off IS Tolerant                                 |
| 243023_PM_at       | ---                | ---                                                                        | 3.84E-08                                    | 2.34                                            | Normal up vs Off IS Tolerant                                 |
| 215211_PM_at       | RRN3P1             | RNA polymerase I transcription factor homolog (S. cerevisiae) pseudogene 1 | 6.55E-08                                    | 2.47                                            | Normal up vs Off IS Tolerant                                 |
| 218492_PM_s_at     | THAP7              | THAP domain containing 7                                                   | 1.29E-07                                    | 1.64                                            | Normal up vs Off IS Tolerant                                 |
| 235005_PM_at       | DIS3L              | DIS3 mitotic control homolog (S. cerevisiae)-like                          | 1.60E-07                                    | 1.91                                            | Normal up vs Off IS Tolerant                                 |
| 207839_PM_s_at     | TMEM8B             | transmembrane protein 8B                                                   | 2.22E-07                                    | 1.54                                            | Normal up vs Off IS Tolerant                                 |
| 201677_PM_at       | C3orf37            | Chromosome 3 open reading frame 37                                         | 2.71E-07                                    | 1.99                                            | Normal up vs Off IS Tolerant                                 |
| 201549_PM_x_at     | KDM5B              | lysine (K)-specific demethylase 5B                                         | 2.79E-07                                    | 1.72                                            | Normal up vs Off IS Tolerant                                 |
| 204556_PM_s_at     | DZIP1              | DAZ interacting protein 1                                                  | 3.59E-07                                    | -1.59                                           | Normal down vs Off IS Tolerant                               |
| 203062_PM_s_at     | MDC1               | mediator of DNA-damage checkpoint 1                                        | 3.85E-07                                    | 1.69                                            | Normal up vs Off IS Tolerant                                 |
| 203015_PM_s_at     | SSX2IP             | synovial sarcoma, X breakpoint 2 interacting protein                       | 3.90E-07                                    | 1.84                                            | Normal up vs Off IS Tolerant                                 |
| 209163_PM_at       | CYB561             | cytochrome b-561                                                           | 5.78E-07                                    | 2.02                                            | Normal up vs Off IS Tolerant                                 |
| 214663_PM_at       | DSTYK              | dual serine/threonine and tyrosine protein kinase                          | 6.48E-07                                    | 2.51                                            | Normal up vs Off IS Tolerant                                 |
| 239212_PM_at       | LTV1               | LTV1 homolog (S. cerevisiae)                                               | 1.00E-06                                    | 1.97                                            | Normal up vs Off IS Tolerant                                 |
| 1552501_PM_a_at    | GPBAR1             | G protein-coupled bile acid receptor 1                                     | 1.18E-06                                    | -1.94                                           | Normal down vs Off IS Tolerant                               |
| 213815_PM_x_at     | C19orf29           | chromosome 19 open reading frame 29                                        | 1.19E-06                                    | 1.69                                            | Normal up vs Off IS Tolerant                                 |
| 242438_PM_at       | ASXL1              | additional sex combs like 1 (Drosophila)                                   | 1.21E-06                                    | 1.98                                            | Normal up vs Off IS Tolerant                                 |
| 225526_PM_at       | MKLN1              | muskelin 1, intracellular mediator containing kelch motifs                 | 1.29E-06                                    | 1.31                                            | Normal up vs Off IS Tolerant                                 |
| 211009_PM_s_at     | ZNF271             | zinc finger protein 271                                                    | 1.39E-06                                    | 2.34                                            | Normal up vs Off IS Tolerant                                 |
| 204911_PM_s_at     | TRIM3              | tripartite motif-containing 3                                              | 1.60E-06                                    | -1.36                                           | Normal down vs Off IS Tolerant                               |

|                |         |                                                                                         |          |       |                                |
|----------------|---------|-----------------------------------------------------------------------------------------|----------|-------|--------------------------------|
| 212778_PM_at   | PACS2   | phosphofurin acidic cluster sorting protein 2                                           | 1.69E-06 | 2.35  | Normal up vs Off IS Tolerant   |
| 221006_PM_s_at | SNX27   | sorting nexin family member 27                                                          | 1.96E-06 | -1.67 | Normal down vs Off IS Tolerant |
| 215754_PM_at   | SCARB2  | scavenger receptor class B, member 2                                                    | 2.08E-06 | 1.65  | Normal up vs Off IS Tolerant   |
| 221562_PM_s_at | SIRT3   | sirtuin 3                                                                               | 2.10E-06 | 1.99  | Normal up vs Off IS Tolerant   |
| 231835_PM_at   | C1orf93 | chromosome 1 open reading frame 93                                                      | 2.20E-06 | 2.22  | Normal up vs Off IS Tolerant   |
| 205005_PM_s_at | NMT2    | N-myristoyltransferase 2                                                                | 2.76E-06 | 2.32  | Normal up vs Off IS Tolerant   |
| 238951_PM_at   | ---     | ---                                                                                     | 2.90E-06 | 2.41  | Normal up vs Off IS Tolerant   |
| 226661_PM_at   | CDCA2   | cell division cycle associated 2                                                        | 2.94E-06 | -1.50 | Normal down vs Off IS Tolerant |
| 232633_PM_at   | XRCC5   | X-ray repair complementing defective repair in Chinese hamster cells 5 (double-strand-b | 2.98E-06 | 2.05  | Normal up vs Off IS Tolerant   |
| 222673_PM_x_at | FAM122B | family with sequence similarity 122B                                                    | 2.99E-06 | 1.49  | Normal up vs Off IS Tolerant   |
| 213434_PM_at   | STX2    | syntaxin 2                                                                              | 3.00E-06 | 1.90  | Normal up vs Off IS Tolerant   |
| 242725_PM_at   | ---     | ---                                                                                     | 3.37E-06 | 2.38  | Normal up vs Off IS Tolerant   |
| 211721_PM_s_at | ZNF551  | zinc finger protein 551                                                                 | 3.39E-06 | 2.07  | Normal up vs Off IS Tolerant   |
| 221812_PM_at   | FBXO42  | F-box protein 42                                                                        | 3.58E-06 | 1.65  | Normal up vs Off IS Tolerant   |
| 37586_PM_at    | ZNF142  | zinc finger protein 142                                                                 | 3.62E-06 | 1.46  | Normal up vs Off IS Tolerant   |
| 230605_PM_at   | ---     | ---                                                                                     | 3.72E-06 | 1.73  | Normal up vs Off IS Tolerant   |
| 239425_PM_at   | DCUN1D5 | DCN1, defective in cullin neddylation 1, domain containing 5 ( <i>S. cerevisiae</i> )   | 3.75E-06 | 1.91  | Normal up vs Off IS Tolerant   |
| 238074_PM_at   | WDR27   | WD repeat domain 27                                                                     | 3.96E-06 | -1.31 | Normal down vs Off IS Tolerant |
| 237486_PM_at   | ---     | ---                                                                                     | 4.00E-06 | -1.56 | Normal down vs Off IS Tolerant |
| 242113_PM_at   | ---     | ---                                                                                     | 4.06E-06 | 1.84  | Normal up vs Off IS Tolerant   |
| 214139_PM_at   | ARID4B  | AT rich interactive domain 4B (RBP1-like)                                               | 4.11E-06 | -1.47 | Normal down vs Off IS Tolerant |
| 236405_PM_at   | FBXO41  | F-box protein 41                                                                        | 4.20E-06 | -1.42 | Normal down vs Off IS Tolerant |
| 238057_PM_at   | USP45   | ubiquitin specific peptidase 45                                                         | 4.30E-06 | 1.79  | Normal up vs Off IS Tolerant   |
| 222482_PM_at   | SSBP3   | single stranded DNA binding protein 3                                                   | 4.42E-06 | 1.88  | Normal up vs Off IS Tolerant   |
| 236288_PM_at   | RNF34   | ring finger protein 34                                                                  | 4.43E-06 | 1.92  | Normal up vs Off IS Tolerant   |

|                 |            |                                                  |          |       |                                |
|-----------------|------------|--------------------------------------------------|----------|-------|--------------------------------|
| 242808_PM_at    | ---        | ---                                              | 4.48E-06 | 1.73  | Normal up vs Off IS Tolerant   |
| 221149_PM_at    | GPR77      | G protein-coupled receptor 77                    | 4.55E-06 | -1.46 | Normal down vs Off IS Tolerant |
| 230083_PM_at    | USP53      | ubiquitin specific peptidase 53                  | 4.72E-06 | 2.62  | Normal up vs Off IS Tolerant   |
| 240849_PM_at    | ---        | ---                                              | 4.81E-06 | -1.48 | Normal down vs Off IS Tolerant |
| 229725_PM_at    | ACSL6      | acyl-CoA synthetase long-chain family member 6   | 4.81E-06 | 2.49  | Normal up vs Off IS Tolerant   |
| 227502_PM_at    | ---        | ---                                              | 4.86E-06 | 2.13  | Normal up vs Off IS Tolerant   |
| 1553696_PM_s_at | ZNF569     | zinc finger protein 569                          | 4.88E-06 | 1.43  | Normal up vs Off IS Tolerant   |
| 235203_PM_at    | ---        | ---                                              | 4.96E-06 | 2.09  | Normal up vs Off IS Tolerant   |
| 213657_PM_s_at  | ---        | ---                                              | 4.97E-06 | 1.88  | Normal up vs Off IS Tolerant   |
| 210304_PM_at    | PDE6B      | phosphodiesterase 6B, cGMP-specific, rod, beta   | 5.06E-06 | 1.45  | Normal up vs Off IS Tolerant   |
| 229990_PM_at    | LOC641467  | hypothetical LOC641467                           | 5.44E-06 | -1.41 | Normal down vs Off IS Tolerant |
| 205739_PM_x_at  | ZNF107     | zinc finger protein 107                          | 5.47E-06 | 1.98  | Normal up vs Off IS Tolerant   |
| 227083_PM_at    | B3GALTL    | beta 1,3-galactosyltransferase-like              | 5.48E-06 | 1.85  | Normal up vs Off IS Tolerant   |
| 219442_PM_at    | KIAA0664L3 | KIAA0664-like 3                                  | 5.54E-06 | 2.30  | Normal up vs Off IS Tolerant   |
| 227783_PM_at    | CCDC57     | coiled-coil domain containing 57                 | 6.03E-06 | 1.37  | Normal up vs Off IS Tolerant   |
| 242915_PM_at    | ZNF682     | zinc finger protein 682                          | 6.14E-06 | 1.83  | Normal up vs Off IS Tolerant   |
| 209494_PM_s_at  | PATZ1      | POZ (BTB) and AT hook containing zinc finger 1   | 6.14E-06 | 1.62  | Normal up vs Off IS Tolerant   |
| 225657_PM_at    | LOC152217  | hypothetical LOC152217                           | 6.16E-06 | 1.51  | Normal up vs Off IS Tolerant   |
| 219351_PM_at    | TRAPPC2    | trafficking protein particle complex 2           | 6.24E-06 | 1.90  | Normal up vs Off IS Tolerant   |
| 219019_PM_at    | LRDD       | leucine-rich repeats and death domain containing | 6.29E-06 | 1.48  | Normal up vs Off IS Tolerant   |
| 207494_PM_s_at  | ZNF76      | zinc finger protein 76 (expressed in testis)     | 6.35E-06 | 1.40  | Normal up vs Off IS Tolerant   |
| 202500_PM_at    | DNAJB2     | Dnaj (Hsp40) homolog, subfamily B, member 2      | 6.36E-06 | 1.65  | Normal up vs Off IS Tolerant   |
| 213757_PM_at    | EIF5A      | Eukaryotic translation initiation factor 5A      | 6.56E-06 | -1.89 | Normal down vs Off IS Tolerant |
| 229501_PM_s_at  | USP8       | ubiquitin specific peptidase 8                   | 6.76E-06 | 1.63  | Normal up vs Off IS Tolerant   |

|                 |         |                                                                    |          |       |                                |
|-----------------|---------|--------------------------------------------------------------------|----------|-------|--------------------------------|
| 233735_PM_at    | ---     | ---                                                                | 6.82E-06 | -1.33 | Normal down vs Off IS Tolerant |
| 229664_PM_at    | MAPK8   | mitogen-activated protein kinase 8                                 | 7.16E-06 | 1.55  | Normal up vs Off IS Tolerant   |
| 201279_PM_s_at  | DAB2    | disabled homolog 2, mitogen-responsive phosphoprotein (Drosophila) | 7.20E-06 | 2.36  | Normal up vs Off IS Tolerant   |
| 213789_PM_at    | ---     | ---                                                                | 7.24E-06 | -1.59 | Normal down vs Off IS Tolerant |
| 1557078_PM_at   | SLFN5   | schlafen family member 5                                           | 7.52E-06 | 2.59  | Normal up vs Off IS Tolerant   |
| 91617_PM_at     | DGCR8   | DiGeorge syndrome critical region gene 8                           | 7.87E-06 | 1.82  | Normal up vs Off IS Tolerant   |
| 1563345_PM_at   | ---     | ---                                                                | 8.62E-06 | 1.80  | Normal up vs Off IS Tolerant   |
| 228604_PM_at    | FAM76A  | family with sequence similarity 76, member A                       | 8.67E-06 | 2.11  | Normal up vs Off IS Tolerant   |
| 227264_PM_at    | ---     | ---                                                                | 9.02E-06 | 1.67  | Normal up vs Off IS Tolerant   |
| 204663_PM_at    | ME3     | malic enzyme 3, NADP(+)-dependent, mitochondrial                   | 9.42E-06 | 1.87  | Normal up vs Off IS Tolerant   |
| 228500_PM_at    | THAP8   | THAP domain containing 8                                           | 9.56E-06 | -1.68 | Normal down vs Off IS Tolerant |
| 208195_PM_at    | TTN     | titin                                                              | 9.61E-06 | 1.98  | Normal up vs Off IS Tolerant   |
| 235566_PM_at    | TMF1    | TATA element modulatory factor 1                                   | 1.02E-05 | 1.87  | Normal up vs Off IS Tolerant   |
| 224163_PM_s_at  | DMAP1   | DNA methyltransferase 1 associated protein 1                       | 1.02E-05 | 1.80  | Normal up vs Off IS Tolerant   |
| 212867_PM_at    | NCOA2   | nuclear receptor coactivator 2                                     | 1.04E-05 | 1.42  | Normal up vs Off IS Tolerant   |
| 235374_PM_at    | MDH1    | Malate dehydrogenase 1, NAD (soluble)                              | 1.10E-05 | 1.68  | Normal up vs Off IS Tolerant   |
| 218297_PM_at    | FAM188A | family with sequence similarity 188, member A                      | 1.11E-05 | 1.59  | Normal up vs Off IS Tolerant   |
| 223849_PM_s_at  | MOV10   | Mov10, Moloney leukemia virus 10, homolog (mouse)                  | 1.11E-05 | 1.99  | Normal up vs Off IS Tolerant   |
| 1556059_PM_s_at | SPEN    | spen homolog, transcriptional regulator (Drosophila)               | 1.15E-05 | 1.70  | Normal up vs Off IS Tolerant   |
| 226848_PM_at    | ---     | ---                                                                | 1.20E-05 | 1.99  | Normal up vs Off IS Tolerant   |
| 1554597_PM_at   | ---     | ---                                                                | 1.22E-05 | 1.66  | Normal up vs Off IS Tolerant   |

|                |           |                                                                                      |          |       |                                |
|----------------|-----------|--------------------------------------------------------------------------------------|----------|-------|--------------------------------|
| 205922_PM_at   | VNN2      | vanin 2                                                                              | 1.23E-05 | -2.04 | Normal down vs Off IS Tolerant |
| 206003_PM_at   | CEP135    | centrosomal protein 135kDa                                                           | 1.24E-05 | 1.50  | Normal up vs Off IS Tolerant   |
| 241093_PM_at   | ---       | ---                                                                                  | 1.29E-05 | 2.52  | Normal up vs Off IS Tolerant   |
| 224184_PM_s_at | BOC       | Boc homolog (mouse)                                                                  | 1.29E-05 | -1.57 | Normal down vs Off IS Tolerant |
| 235106_PM_at   | MAML2     | mastermind-like 2 (Drosophila)                                                       | 1.30E-05 | 1.59  | Normal up vs Off IS Tolerant   |
| 225746_PM_at   | RAB11FIP4 | RAB11 family interacting protein 4 (class II)                                        | 1.31E-05 | 1.73  | Normal up vs Off IS Tolerant   |
| 200626_PM_s_at | MATR3     | matrin 3                                                                             | 1.34E-05 | 1.29  | Normal up vs Off IS Tolerant   |
| 209938_PM_at   | TADA2A    | transcriptional adaptor 2A                                                           | 1.35E-05 | -1.40 | Normal down vs Off IS Tolerant |
| 242337_PM_at   | ---       | ---                                                                                  | 1.37E-05 | 1.89  | Normal up vs Off IS Tolerant   |
| 218402_PM_s_at | HPS4      | Hermansky-Pudlak syndrome 4                                                          | 1.38E-05 | 1.97  | Normal up vs Off IS Tolerant   |
| 218098_PM_at   | ARFGEF2   | ADP-ribosylation factor guanine nucleotide-exchange factor 2 (brefeldin A inhibited) | 1.42E-05 | 1.47  | Normal up vs Off IS Tolerant   |
| 226470_PM_at   | GGT7      | gamma-glutamyltransferase 7                                                          | 1.42E-05 | 1.81  | Normal up vs Off IS Tolerant   |
| 216247_PM_at   | ---       | ---                                                                                  | 1.42E-05 | 1.51  | Normal up vs Off IS Tolerant   |
| 239196_PM_at   | ANKRD22   | ankyrin repeat domain 22                                                             | 1.43E-05 | -1.60 | Normal down vs Off IS Tolerant |
| 217539_PM_at   | C18orf25  | chromosome 18 open reading frame 25                                                  | 1.44E-05 | -1.54 | Normal down vs Off IS Tolerant |
| 244389_PM_at   | TLK1      | tousled-like kinase 1                                                                | 1.44E-05 | 1.56  | Normal up vs Off IS Tolerant   |
| 223541_PM_at   | HAS3      | hyaluronan synthase 3                                                                | 1.51E-05 | 1.49  | Normal up vs Off IS Tolerant   |
| 238026_PM_at   | RPL35A    | ribosomal protein L35a                                                               | 1.53E-05 | 2.19  | Normal up vs Off IS Tolerant   |
| 52731_PM_at    | AMBRA1    | autophagy/beclin-1 regulator 1                                                       | 1.54E-05 | 1.50  | Normal up vs Off IS Tolerant   |
| 227934_PM_at   | KPNA5     | karyopherin alpha 5 (importin alpha 6)                                               | 1.56E-05 | 1.70  | Normal up vs Off IS Tolerant   |
| 233995_PM_at   | ---       | ---                                                                                  | 1.58E-05 | 1.95  | Normal up vs Off IS Tolerant   |
| 231008_PM_at   | UNC5CL    | unc-5 homolog C (C. elegans)-like                                                    | 1.59E-05 | 1.45  | Normal up vs Off IS Tolerant   |
| 224045_PM_x_at | C18orf2   | chromosome 18 open reading frame 2                                                   | 1.61E-05 | -1.55 | Normal down vs Off IS Tolerant |
| 230616_PM_at   | LAMB2P1   | laminin, beta 2 pseudogene 1                                                         | 1.61E-05 | 1.60  | Normal up vs Off IS Tolerant   |
| 241954_PM_at   | FDFT1     | Farnesyl-diphosphate farnesyltransferase 1                                           | 1.62E-05 | 1.90  | Normal up vs Off IS Tolerant   |

|                 |           |                                                                |          |       |                                |
|-----------------|-----------|----------------------------------------------------------------|----------|-------|--------------------------------|
| 1554919_PM_s_at | C7orf63   | chromosome 7 open reading frame 63                             | 1.62E-05 | -2.03 | Normal down vs Off IS Tolerant |
| 230692_PM_at    | LOC157503 | hypothetical protein LOC157503                                 | 1.63E-05 | -1.80 | Normal down vs Off IS Tolerant |
| 212684_PM_at    | ZNF3      | zinc finger protein 3                                          | 1.66E-05 | 1.62  | Normal up vs Off IS Tolerant   |
| 210268_PM_at    | NFX1      | nuclear transcription factor, X-box binding 1                  | 1.67E-05 | 2.00  | Normal up vs Off IS Tolerant   |
| 208322_PM_s_at  | ST3GAL1   | ST3 beta-galactoside alpha-2,3-sialyltransferase 1             | 1.69E-05 | 1.42  | Normal up vs Off IS Tolerant   |
| 210105_PM_s_at  | FYN       | FYN oncogene related to SRC, FGR, YES                          | 1.71E-05 | 1.35  | Normal up vs Off IS Tolerant   |
| 222317_PM_at    | PDE3B     | phosphodiesterase 3B, cGMP-inhibited                           | 1.72E-05 | 2.89  | Normal up vs Off IS Tolerant   |
| 239195_PM_at    | ---       | ---                                                            | 1.73E-05 | -1.31 | Normal down vs Off IS Tolerant |
| 243617_PM_at    | ZNF827    | Zinc finger protein 827                                        | 1.78E-05 | 1.52  | Normal up vs Off IS Tolerant   |
| 230612_PM_at    | WDR73     | WD repeat domain 73                                            | 1.82E-05 | 1.58  | Normal up vs Off IS Tolerant   |
| 226392_PM_at    | RASA2     | RAS p21 protein activator 2                                    | 1.91E-05 | 1.46  | Normal up vs Off IS Tolerant   |
| 1553979_PM_at   | ---       | ---                                                            | 1.93E-05 | 1.42  | Normal up vs Off IS Tolerant   |
| 222674_PM_at    | C9orf114  | chromosome 9 open reading frame 114                            | 1.95E-05 | 1.64  | Normal up vs Off IS Tolerant   |
| 225346_PM_at    | MTERFD3   | MTERF domain containing 3                                      | 1.99E-05 | 1.86  | Normal up vs Off IS Tolerant   |
| 216026_PM_s_at  | POLE      | polymerase (DNA directed), epsilon                             | 2.01E-05 | 1.67  | Normal up vs Off IS Tolerant   |
| 224388_PM_s_at  | COL25A1   | collagen, type XXV, alpha 1                                    | 2.01E-05 | -1.40 | Normal down vs Off IS Tolerant |
| 227900_PM_at    | CBLB      | Cas-Br-M (murine) ecotropic retroviral transforming sequence b | 2.05E-05 | 2.23  | Normal up vs Off IS Tolerant   |
| 214764_PM_at    | RRP15     | ribosomal RNA processing 15 homolog (S. cerevisiae)            | 2.07E-05 | 1.55  | Normal up vs Off IS Tolerant   |
| 210045_PM_at    | IDH2      | isocitrate dehydrogenase 2 (NADP+), mitochondrial              | 2.11E-05 | 1.94  | Normal up vs Off IS Tolerant   |
| 242298_PM_x_at  | ---       | ---                                                            | 2.12E-05 | 1.80  | Normal up vs Off IS Tolerant   |
| 206102_PM_at    | GIN51     | GIN5 complex subunit 1 (Psf1 homolog)                          | 2.12E-05 | -1.99 | Normal down vs Off IS Tolerant |
| 1559532_PM_at   | C3orf71   | chromosome 3 open reading frame 71                             | 2.18E-05 | 1.68  | Normal up vs Off IS Tolerant   |
| 219335_PM_at    | ARMCX5    | armadillo repeat containing, X-linked 5                        | 2.18E-05 | 1.92  | Normal up vs Off IS Tolerant   |

|                |          |                                                                                     |          |       |                                |
|----------------|----------|-------------------------------------------------------------------------------------|----------|-------|--------------------------------|
| 210422_PM_x_at | SLC11A1  | solute carrier family 11 (proton-coupled divalent metal ion transporters), member 1 | 2.19E-05 | -1.72 | Normal down vs Off IS Tolerant |
| 235231_PM_at   | ZNF789   | zinc finger protein 789                                                             | 2.21E-05 | 2.01  | Normal up vs Off IS Tolerant   |
| 235494_PM_at   | LSAMP    | limbic system-associated membrane protein                                           | 2.21E-05 | -1.40 | Normal down vs Off IS Tolerant |
| 218480_PM_at   | AGBL5    | ATP/GTP binding protein-like 5                                                      | 2.25E-05 | 1.53  | Normal up vs Off IS Tolerant   |
| 211280_PM_s_at | NRF1     | nuclear respiratory factor 1                                                        | 2.28E-05 | 1.49  | Normal up vs Off IS Tolerant   |
| 37860_PM_at    | ZNF337   | zinc finger protein 337                                                             | 2.28E-05 | 1.56  | Normal up vs Off IS Tolerant   |
| 216160_PM_at   | ---      | ---                                                                                 | 2.30E-05 | -1.34 | Normal down vs Off IS Tolerant |
| 229702_PM_at   | CSNK1G3  | casein kinase 1, gamma 3                                                            | 2.41E-05 | -1.41 | Normal down vs Off IS Tolerant |
| 225007_PM_at   | G3BP1    | GTPase activating protein (SH3 domain) binding protein 1                            | 2.42E-05 | 1.39  | Normal up vs Off IS Tolerant   |
| 233235_PM_x_at | ---      | ---                                                                                 | 2.45E-05 | -1.61 | Normal down vs Off IS Tolerant |
| 225361_PM_x_at | FAM122B  | family with sequence similarity 122B                                                | 2.48E-05 | 1.44  | Normal up vs Off IS Tolerant   |
| 208472_PM_at   | IKZF4    | IKAROS family zinc finger 4 (Eos)                                                   | 2.52E-05 | -1.32 | Normal down vs Off IS Tolerant |
| 204834_PM_at   | FGL2     | fibrinogen-like 2                                                                   | 2.53E-05 | -1.76 | Normal down vs Off IS Tolerant |
| 242643_PM_x_at | ---      | ---                                                                                 | 2.53E-05 | -1.35 | Normal down vs Off IS Tolerant |
| 206708_PM_at   | FOXN2    | forkhead box N2                                                                     | 2.55E-05 | -1.63 | Normal down vs Off IS Tolerant |
| 240455_PM_at   | ---      | ---                                                                                 | 2.55E-05 | 1.46  | Normal up vs Off IS Tolerant   |
| 217473_PM_x_at | SLC11A1  | solute carrier family 11 (proton-coupled divalent metal ion transporters), member 1 | 2.58E-05 | -1.77 | Normal down vs Off IS Tolerant |
| 219154_PM_at   | TMEM120B | transmembrane protein 120B                                                          | 2.64E-05 | 1.42  | Normal up vs Off IS Tolerant   |
| 221940_PM_at   | RPUSD2   | RNA pseudouridylate synthase domain containing 2                                    | 2.66E-05 | 1.51  | Normal up vs Off IS Tolerant   |
| 234998_PM_at   | RAB11A   | RAB11A, member RAS oncogene family                                                  | 2.70E-05 | 2.16  | Normal up vs Off IS Tolerant   |



|                 |                          |                                                                   |          |       |                                |
|-----------------|--------------------------|-------------------------------------------------------------------|----------|-------|--------------------------------|
| 1552412_PM_a_at | DEFB106A ///<br>DEFB106B | defensin, beta 106A /// defensin, beta 106B                       | 2.73E-05 | -1.75 | Normal down vs Off IS Tolerant |
| 225757_PM_s_at  | CLMN                     | calmin (calponin-like, transmembrane)                             | 2.76E-05 | -1.59 | Normal down vs Off IS Tolerant |
| 228948_PM_at    | EPHA4                    | EPH receptor A4                                                   | 2.78E-05 | 1.80  | Normal up vs Off IS Tolerant   |
| 228627_PM_at    | TLK2                     | tousled-like kinase 2                                             | 2.83E-05 | 1.55  | Normal up vs Off IS Tolerant   |
| 243005_PM_at    | ---                      | ---                                                               | 2.84E-05 | 1.51  | Normal up vs Off IS Tolerant   |
| 209600_PM_s_at  | ACOX1                    | acyl-CoA oxidase 1, palmitoyl                                     | 2.85E-05 | -2.34 | Normal down vs Off IS Tolerant |
| 204294_PM_at    | AMT                      | aminomethyltransferase                                            | 2.87E-05 | 1.53  | Normal up vs Off IS Tolerant   |
| 212947_PM_at    | SLC9A8                   | solute carrier family 9 (sodium/hydrogen exchanger), member 8     | 2.89E-05 | 1.87  | Normal up vs Off IS Tolerant   |
| 1553132_PM_a_at | TC2N                     | tandem C2 domains, nuclear                                        | 2.91E-05 | 2.09  | Normal up vs Off IS Tolerant   |
| 208657_PM_s_at  | 9-Sep                    | septin 9                                                          | 2.92E-05 | 1.32  | Normal up vs Off IS Tolerant   |
| 223472_PM_at    | WHSC1                    | Wolf-Hirschhorn syndrome candidate 1                              | 2.92E-05 | -1.42 | Normal down vs Off IS Tolerant |
| 202782_PM_s_at  | INPP5K                   | inositol polyphosphate-5-phosphatase K                            | 2.96E-05 | 1.47  | Normal up vs Off IS Tolerant   |
| 208771_PM_s_at  | LTA4H                    | leukotriene A4 hydrolase                                          | 2.96E-05 | -1.67 | Normal down vs Off IS Tolerant |
| 239084_PM_at    | SNAP29                   | synaptosomal-associated protein, 29kDa                            | 2.97E-05 | 2.32  | Normal up vs Off IS Tolerant   |
| 209024_PM_s_at  | SYNCRIP                  | synaptotagmin binding, cytoplasmic RNA interacting protein        | 3.01E-05 | -1.34 | Normal down vs Off IS Tolerant |
| 209406_PM_at    | BAG2                     | BCL2-associated athanogene 2                                      | 3.02E-05 | 1.75  | Normal up vs Off IS Tolerant   |
| 217649_PM_at    | ZFAND5                   | zinc finger, AN1-type domain 5                                    | 3.06E-05 | 2.39  | Normal up vs Off IS Tolerant   |
| 203199_PM_s_at  | MTRR                     | 5-methyltetrahydrofolate-homocysteine methyltransferase reductase | 3.06E-05 | 2.23  | Normal up vs Off IS Tolerant   |
| 223774_PM_at    | SNHG12                   | small nucleolar RNA host gene 12 (non-protein coding)             | 3.08E-05 | 1.66  | Normal up vs Off IS Tolerant   |
| 225905_PM_s_at  | ST3GAL3                  | ST3 beta-galactoside alpha-2,3-sialyltransferase 3                | 3.10E-05 | 1.40  | Normal up vs Off IS Tolerant   |
| 1557733_PM_a_at | ---                      | ---                                                               | 3.12E-05 | 3.65  | Normal up vs Off IS Tolerant   |

|                 |                |                                                                                         |          |       |                                |
|-----------------|----------------|-----------------------------------------------------------------------------------------|----------|-------|--------------------------------|
| 206095_PM_s_at  | SRSF10         | serine/arginine-rich splicing factor 10                                                 | 3.12E-05 | 1.45  | Normal up vs Off IS Tolerant   |
| 228395_PM_at    | GLT8D1         | Glycosyltransferase 8 domain containing 1                                               | 3.12E-05 | 1.86  | Normal up vs Off IS Tolerant   |
| 222710_PM_at    | GMPPB          | GDP-mannose pyrophosphorylase B                                                         | 3.13E-05 | 1.39  | Normal up vs Off IS Tolerant   |
| 1555316_PM_a_at | KCNH7          | potassium voltage-gated channel, subfamily H (eag-related), member 7                    | 3.14E-05 | -1.46 | Normal down vs Off IS Tolerant |
| 219759_PM_at    | ERAP2          | endoplasmic reticulum aminopeptidase 2                                                  | 3.16E-05 | 5.45  | Normal up vs Off IS Tolerant   |
| 207124_PM_s_at  | GNB5           | guanine nucleotide binding protein (G protein), beta 5                                  | 3.22E-05 | 2.45  | Normal up vs Off IS Tolerant   |
| 223103_PM_at    | STARD10        | StAR-related lipid transfer (START) domain containing 10                                | 3.22E-05 | 1.59  | Normal up vs Off IS Tolerant   |
| 204791_PM_at    | NR2C1          | nuclear receptor subfamily 2, group C, member 1                                         | 3.25E-05 | 1.81  | Normal up vs Off IS Tolerant   |
| 212276_PM_at    | LPIN1          | lipin 1                                                                                 | 3.29E-05 | 1.54  | Normal up vs Off IS Tolerant   |
| 204658_PM_at    | TRA2A          | transformer 2 alpha homolog (Drosophila)                                                | 3.32E-05 | 1.38  | Normal up vs Off IS Tolerant   |
| 227261_PM_at    | KLF12          | Kruppel-like factor 12                                                                  | 3.33E-05 | 1.62  | Normal up vs Off IS Tolerant   |
| 205819_PM_at    | MARCO          | macrophage receptor with collagenous structure                                          | 3.38E-05 | -2.45 | Normal down vs Off IS Tolerant |
| 221221_PM_s_at  | KLHL3          | kelch-like 3 (Drosophila)                                                               | 3.40E-05 | 1.91  | Normal up vs Off IS Tolerant   |
| 208262_PM_x_at  | MEFV           | Mediterranean fever                                                                     | 3.45E-05 | -2.69 | Normal down vs Off IS Tolerant |
| 228518_PM_at    | IGHG1 /// IGHM | immunoglobulin heavy constant gamma 1 (G1m marker) /// immunoglobulin heavy constant mu | 3.48E-05 | 2.61  | Normal up vs Off IS Tolerant   |
| 44040_PM_at     | FBXO41         | F-box protein 41                                                                        | 3.50E-05 | 1.72  | Normal up vs Off IS Tolerant   |
| 1563469_PM_at   | ---            | ---                                                                                     | 3.52E-05 | 1.98  | Normal up vs Off IS Tolerant   |
| 203782_PM_s_at  | POLRMT         | polymerase (RNA) mitochondrial (DNA directed)                                           | 3.57E-05 | 1.75  | Normal up vs Off IS Tolerant   |
| 222119_PM_s_at  | FBXO11         | F-box protein 11                                                                        | 3.58E-05 | 1.41  | Normal up vs Off IS Tolerant   |
| 214751_PM_at    | ZNF468         | zinc finger protein 468                                                                 | 3.59E-05 | 1.84  | Normal up vs Off IS Tolerant   |
| 218421_PM_at    | CERK           | ceramide kinase                                                                         | 3.63E-05 | 1.30  | Normal up vs Off IS Tolerant   |
| 211686_PM_s_at  | MAK16          | MAK16 homolog (S. cerevisiae)                                                           | 3.65E-05 | 1.53  | Normal up vs Off IS Tolerant   |

|                 |                               |                                                                                         |          |       |                                |
|-----------------|-------------------------------|-----------------------------------------------------------------------------------------|----------|-------|--------------------------------|
| 233019_PM_at    | CNOT7                         | CCR4-NOT transcription complex, subunit 7                                               | 3.66E-05 | 2.15  | Normal up vs Off IS Tolerant   |
| 212221_PM_x_at  | AFMID /// IDS                 | arylformamidase /// iduronate 2-sulfatase                                               | 3.68E-05 | 1.32  | Normal up vs Off IS Tolerant   |
| 210852_PM_s_at  | AASS                          | aminoadipate-semialdehyde synthase                                                      | 3.69E-05 | 1.34  | Normal up vs Off IS Tolerant   |
| 213304_PM_at    | FAM179B                       | family with sequence similarity 179, member B                                           | 3.72E-05 | 1.83  | Normal up vs Off IS Tolerant   |
| 215606_PM_s_at  | ERC1                          | ELKS/RAB6-interacting/CAST family member 1                                              | 3.80E-05 | 1.84  | Normal up vs Off IS Tolerant   |
| 233434_PM_at    | ---                           | ---                                                                                     | 3.82E-05 | -1.31 | Normal down vs Off IS Tolerant |
| 239315_PM_at    | FAM115C                       | family with sequence similarity 115, member C                                           | 3.83E-05 | -1.50 | Normal down vs Off IS Tolerant |
| 1558844_PM_at   | LOC387790                     | hypothetical LOC387790                                                                  | 3.83E-05 | -1.31 | Normal down vs Off IS Tolerant |
| 211050_PM_x_at  | LOC100134822 /// LOC100288069 | similar to hCG1739109 /// hypothetical LOC100288069                                     | 3.86E-05 | -1.68 | Normal down vs Off IS Tolerant |
| 1563581_PM_at   | LOC285456                     | hypothetical LOC285456                                                                  | 3.94E-05 | -1.40 | Normal down vs Off IS Tolerant |
| 208798_PM_x_at  | GOLGA8A                       | golgin A8 family, member A                                                              | 3.96E-05 | 1.93  | Normal up vs Off IS Tolerant   |
| 236964_PM_at    | LOC100509093                  | hypothetical LOC100509093                                                               | 3.97E-05 | -1.35 | Normal down vs Off IS Tolerant |
| 223590_PM_at    | ZNF700                        | zinc finger protein 700                                                                 | 3.98E-05 | 1.70  | Normal up vs Off IS Tolerant   |
| 202455_PM_at    | HDAC5                         | histone deacetylase 5                                                                   | 3.98E-05 | 1.65  | Normal up vs Off IS Tolerant   |
| 218551_PM_at    | MIIP                          | migration and invasion inhibitory protein                                               | 3.98E-05 | -1.34 | Normal down vs Off IS Tolerant |
| 238257_PM_at    | MLLT10                        | Myeloid/lymphoid or mixed-lineage leukemia (trithorax homolog, Drosophila); translocate | 3.99E-05 | 1.44  | Normal up vs Off IS Tolerant   |
| 217336_PM_at    | RPS10 /// RPS10P7             | ribosomal protein S10 /// ribosomal protein S10 pseudogene 7                            | 4.03E-05 | 1.63  | Normal up vs Off IS Tolerant   |
| 233827_PM_s_at  | SUPT16H                       | suppressor of Ty 16 homolog (S. cerevisiae)                                             | 4.04E-05 | -1.82 | Normal down vs Off IS Tolerant |
| 1560029_PM_a_at | C11orf57                      | chromosome 11 open reading frame 57                                                     | 4.04E-05 | 1.70  | Normal up vs Off IS Tolerant   |

|                |           |                                                                            |          |       |                                |
|----------------|-----------|----------------------------------------------------------------------------|----------|-------|--------------------------------|
| 203329_PM_at   | PTPRM     | protein tyrosine phosphatase, receptor type, M                             | 4.12E-05 | 2.29  | Normal up vs Off IS Tolerant   |
| 34221_PM_at    | HMGXB3    | HMG box domain containing 3                                                | 4.15E-05 | 1.29  | Normal up vs Off IS Tolerant   |
| 231902_PM_at   | ZNF827    | zinc finger protein 827                                                    | 4.19E-05 | 1.32  | Normal up vs Off IS Tolerant   |
| 229340_PM_at   | NKAPL     | NFKB activating protein-like                                               | 4.20E-05 | -1.48 | Normal down vs Off IS Tolerant |
| 1559520_PM_at  | ---       | ---                                                                        | 4.23E-05 | -1.55 | Normal down vs Off IS Tolerant |
| 237236_PM_x_at | LOC731789 | hypothetical LOC731789                                                     | 4.26E-05 | 1.35  | Normal up vs Off IS Tolerant   |
| 237771_PM_s_at | ---       | ---                                                                        | 4.27E-05 | -2.63 | Normal down vs Off IS Tolerant |
| 212465_PM_at   | SETD3     | SET domain containing 3                                                    | 4.32E-05 | -1.34 | Normal down vs Off IS Tolerant |
| 239678_PM_at   | ---       | ---                                                                        | 4.45E-05 | 2.07  | Normal up vs Off IS Tolerant   |
| 218769_PM_s_at | ANKRA2    | ankyrin repeat, family A (RFXANK-like), 2                                  | 4.49E-05 | 1.63  | Normal up vs Off IS Tolerant   |
| 225901_PM_at   | PTPMT1    | protein tyrosine phosphatase, mitochondrial 1                              | 4.53E-05 | 1.52  | Normal up vs Off IS Tolerant   |
| 227201_PM_at   | LOC643837 | hypothetical LOC643837                                                     | 4.57E-05 | 2.01  | Normal up vs Off IS Tolerant   |
| 223512_PM_at   | SAR1B     | SAR1 homolog B ( <i>S. cerevisiae</i> )                                    | 4.65E-05 | -1.57 | Normal down vs Off IS Tolerant |
| 228557_PM_at   | L3MBTL4   | l(3)mbt-like 4 ( <i>Drosophila</i> )                                       | 4.67E-05 | -1.86 | Normal down vs Off IS Tolerant |
| 202877_PM_s_at | CD93      | CD93 molecule                                                              | 4.67E-05 | -2.17 | Normal down vs Off IS Tolerant |
| 227625_PM_s_at | STUB1     | STIP1 homology and U-box containing protein 1, E3 ubiquitin protein ligase | 4.76E-05 | 1.30  | Normal up vs Off IS Tolerant   |
| 209627_PM_s_at | OSBPL3    | oxysterol binding protein-like 3                                           | 4.83E-05 | 1.78  | Normal up vs Off IS Tolerant   |
| 209144_PM_s_at | CBFA2T2   | core-binding factor, runt domain, alpha subunit 2; translocated to, 2      | 4.86E-05 | 1.40  | Normal up vs Off IS Tolerant   |
| 232677_PM_at   | ---       | ---                                                                        | 4.89E-05 | 1.51  | Normal up vs Off IS Tolerant   |
| 202436_PM_s_at | CYP1B1    | cytochrome P450, family 1, subfamily B, polypeptide 1                      | 4.90E-05 | -2.94 | Normal down vs Off IS Tolerant |
| 215960_PM_at   | SLC5A4    | solute carrier family 5 (low affinity glucose cotransporter), member 4     | 4.90E-05 | -1.32 | Normal down vs Off IS Tolerant |

|                |                                 |                                                                                        |          |       |                                |
|----------------|---------------------------------|----------------------------------------------------------------------------------------|----------|-------|--------------------------------|
| 241550_PM_at   | DPPA5                           | developmental pluripotency associated 5                                                | 4.93E-05 | -1.30 | Normal down vs Off IS Tolerant |
| 209934_PM_s_at | ATP2C1                          | ATPase, Ca++ transporting, type 2C, member 1                                           | 4.93E-05 | 1.55  | Normal up vs Off IS Tolerant   |
| 225033_PM_at   | ST3GAL1                         | ST3 beta-galactoside alpha-2,3-sialyltransferase 1                                     | 4.94E-05 | 1.73  | Normal up vs Off IS Tolerant   |
| 218347_PM_at   | LOC100510632 /// TYW1 /// TYW1B | tRNA wybutosine-synthesizing protein 1 homolog B-like /// tRNA-yW synthesizing protein | 4.96E-05 | 1.29  | Normal up vs Off IS Tolerant   |
| 220758_PM_s_at | ROBO4                           | roundabout homolog 4, magic roundabout (Drosophila)                                    | 5.04E-05 | -1.33 | Normal down vs Off IS Tolerant |
| 226894_PM_at   | SLC35A3                         | solute carrier family 35 (UDP-N-acetylglucosamine (UDP-GlcNAc) transporter), member A3 | 5.06E-05 | 1.61  | Normal up vs Off IS Tolerant   |
| 228318_PM_s_at | CRIPAK                          | cysteine-rich PAK1 inhibitor                                                           | 5.12E-05 | 1.67  | Normal up vs Off IS Tolerant   |
| 210069_PM_at   | CHKB-CPT1B /// CPT1B            | choline kinase-like, carnitine palmitoyltransferase 1B (muscle) transcription unit /// | 5.12E-05 | 2.15  | Normal up vs Off IS Tolerant   |
| 238552_PM_at   | ---                             | ---                                                                                    | 5.16E-05 | 1.56  | Normal up vs Off IS Tolerant   |
| 200917_PM_s_at | SRPR                            | signal recognition particle receptor (docking protein)                                 | 5.16E-05 | -1.60 | Normal down vs Off IS Tolerant |
| 213353_PM_at   | ABCA5                           | ATP-binding cassette, sub-family A (ABC1), member 5                                    | 5.22E-05 | 1.60  | Normal up vs Off IS Tolerant   |
| 1564787_PM_at  | LOC643923                       | hypothetical LOC643923                                                                 | 5.22E-05 | -1.34 | Normal down vs Off IS Tolerant |
| 230201_PM_at   | FXR1                            | fragile X mental retardation, autosomal homolog 1                                      | 5.27E-05 | -1.30 | Normal down vs Off IS Tolerant |
| 218765_PM_at   | SIDT2                           | SID1 transmembrane family, member 2                                                    | 5.37E-05 | -1.47 | Normal down vs Off IS Tolerant |
| 226399_PM_at   | DNAJB14                         | DnaJ (Hsp40) homolog, subfamily B, member 14                                           | 5.40E-05 | 1.54  | Normal up vs Off IS Tolerant   |
| 214001_PM_x_at | ---                             | ---                                                                                    | 5.47E-05 | -1.98 | Normal down vs Off IS Tolerant |
| 244397_PM_at   | ---                             | ---                                                                                    | 5.47E-05 | 1.64  | Normal up vs Off IS Tolerant   |
| 227606_PM_s_at | STAMBPL1                        | STAM binding protein-like 1                                                            | 5.53E-05 | 1.84  | Normal up vs Off IS Tolerant   |

|                |                      |                                                                                            |          |       |                                |
|----------------|----------------------|--------------------------------------------------------------------------------------------|----------|-------|--------------------------------|
| 234886_PM_at   | TRBV24-1             | T cell receptor beta variable 24-1                                                         | 5.56E-05 | 2.00  | Normal up vs Off IS Tolerant   |
| 218955_PM_at   | BRF2                 | BRF2, subunit of RNA polymerase III transcription initiation factor, BRF1-like             | 5.58E-05 | 1.44  | Normal up vs Off IS Tolerant   |
| 217527_PM_s_at | NFATC2IP             | nuclear factor of activated T-cells, cytoplasmic, calcineurin-dependent 2 interacting p    | 5.61E-05 | 1.48  | Normal up vs Off IS Tolerant   |
| 205833_PM_s_at | PART1                | prostate androgen-regulated transcript 1 (non-protein coding)                              | 5.61E-05 | -1.74 | Normal down vs Off IS Tolerant |
| 232154_PM_at   | C19orf76             | chromosome 19 open reading frame 76                                                        | 5.65E-05 | 1.46  | Normal up vs Off IS Tolerant   |
| 213979_PM_s_at | ---                  | ---                                                                                        | 5.65E-05 | -1.53 | Normal down vs Off IS Tolerant |
| 220739_PM_s_at | CNNM3                | cyclin M3                                                                                  | 5.74E-05 | 1.69  | Normal up vs Off IS Tolerant   |
| 225181_PM_at   | ARID1B               | AT rich interactive domain 1B (SWI1-like)                                                  | 5.78E-05 | 1.54  | Normal up vs Off IS Tolerant   |
| 235104_PM_at   | ERAP2                | endoplasmic reticulum aminopeptidase 2                                                     | 5.91E-05 | 4.21  | Normal up vs Off IS Tolerant   |
| 202527_PM_s_at | SMAD4                | SMAD family member 4                                                                       | 5.93E-05 | 1.68  | Normal up vs Off IS Tolerant   |
| 212758_PM_s_at | ZEB1                 | zinc finger E-box binding homeobox 1                                                       | 5.93E-05 | 1.83  | Normal up vs Off IS Tolerant   |
| 241384_PM_x_at | GK5                  | glycerol kinase 5 (putative)                                                               | 5.99E-05 | 1.89  | Normal up vs Off IS Tolerant   |
| 226229_PM_s_at | SSU72                | SSU72 RNA polymerase II CTD phosphatase homolog ( <i>S. cerevisiae</i> )                   | 5.99E-05 | 1.60  | Normal up vs Off IS Tolerant   |
| 206780_PM_at   | GAD2                 | glutamate decarboxylase 2 (pancreatic islets and brain, 65kDa)                             | 5.99E-05 | -1.34 | Normal down vs Off IS Tolerant |
| 1560773_PM_at  | DLGAP1 /// LOC388458 | discs, large ( <i>Drosophila</i> ) homolog-associated protein 1 /// hypothetical LOC388458 | 5.99E-05 | -1.32 | Normal down vs Off IS Tolerant |
| 1562032_PM_at  | ---                  | ---                                                                                        | 6.01E-05 | -1.32 | Normal down vs Off IS Tolerant |
| 227340_PM_s_at | RGMB                 | RGM domain family, member B                                                                | 6.03E-05 | 1.44  | Normal up vs Off IS Tolerant   |
| 221167_PM_s_at | CCDC70               | coiled-coil domain containing 70                                                           | 6.07E-05 | -1.35 | Normal down vs Off IS Tolerant |
| 1554287_PM_at  | TRIM4                | tripartite motif-containing 4                                                              | 6.15E-05 | 1.85  | Normal up vs Off IS Tolerant   |
| 236407_PM_at   | KCNE1                | potassium voltage-gated channel, Isk-related family, member 1                              | 6.16E-05 | -1.35 | Normal down vs Off IS Tolerant |

|                |           |                                                                                       |          |       |                                |
|----------------|-----------|---------------------------------------------------------------------------------------|----------|-------|--------------------------------|
| 222018_PM_at   | NACA      | nascent polypeptide-associated complex alpha subunit                                  | 6.16E-05 | 1.79  | Normal up vs Off IS Tolerant   |
| 202178_PM_at   | PRKCZ     | protein kinase C, zeta                                                                | 6.17E-05 | 1.68  | Normal up vs Off IS Tolerant   |
| 231121_PM_at   | HPS3      | Hermansky-Pudlak syndrome 3                                                           | 6.20E-05 | 2.10  | Normal up vs Off IS Tolerant   |
| 244160_PM_at   | ---       | ---                                                                                   | 6.24E-05 | 1.48  | Normal up vs Off IS Tolerant   |
| 212853_PM_at   | DCUN1D4   | DCN1, defective in cullin neddylation 1, domain containing 4 ( <i>S. cerevisiae</i> ) | 6.32E-05 | 1.46  | Normal up vs Off IS Tolerant   |
| 229970_PM_at   | ---       | ---                                                                                   | 6.34E-05 | -1.34 | Normal down vs Off IS Tolerant |
| 225931_PM_s_at | RNF213    | ring finger protein 213                                                               | 6.37E-05 | 1.44  | Normal up vs Off IS Tolerant   |
| 225610_PM_at   | UHRF2     | ubiquitin-like with PHD and ring finger domains 2                                     | 6.39E-05 | 1.32  | Normal up vs Off IS Tolerant   |
| 206130_PM_s_at | ASGR2     | asialoglycoprotein receptor 2                                                         | 6.44E-05 | -2.12 | Normal down vs Off IS Tolerant |
| 228570_PM_at   | BTBD11    | BTB (POZ) domain containing 11                                                        | 6.46E-05 | 1.96  | Normal up vs Off IS Tolerant   |
| 206839_PM_at   | C22orf31  | chromosome 22 open reading frame 31                                                   | 6.49E-05 | -1.27 | Normal down vs Off IS Tolerant |
| 233933_PM_s_at | OTUD5     | OTU domain containing 5                                                               | 6.53E-05 | 1.57  | Normal up vs Off IS Tolerant   |
| 232663_PM_s_at | LOC390595 | ubiquitin-associated protein 1-like                                                   | 6.53E-05 | 1.38  | Normal up vs Off IS Tolerant   |
| 211729_PM_x_at | BLVRA     | biliverdin reductase A                                                                | 6.55E-05 | -1.52 | Normal down vs Off IS Tolerant |
| 218429_PM_s_at | C19orf66  | chromosome 19 open reading frame 66                                                   | 6.56E-05 | 1.32  | Normal up vs Off IS Tolerant   |
| 205089_PM_at   | ZNF7      | zinc finger protein 7                                                                 | 6.56E-05 | 1.79  | Normal up vs Off IS Tolerant   |
| 212225_PM_at   | EIF1      | eukaryotic translation initiation factor 1                                            | 6.58E-05 | 1.62  | Normal up vs Off IS Tolerant   |
| 212156_PM_at   | VPS39     | vacuolar protein sorting 39 homolog ( <i>S. cerevisiae</i> )                          | 6.61E-05 | 1.41  | Normal up vs Off IS Tolerant   |
| 223738_PM_s_at | PGM2      | phosphoglucomutase 2                                                                  | 6.64E-05 | -1.53 | Normal down vs Off IS Tolerant |
| 228626_PM_at   | ---       | ---                                                                                   | 6.68E-05 | 1.50  | Normal up vs Off IS Tolerant   |
| 218935_PM_at   | EHD3      | EH-domain containing 3                                                                | 6.71E-05 | 1.84  | Normal up vs Off IS Tolerant   |
| 230843_PM_at   | ---       | ---                                                                                   | 6.76E-05 | 1.60  | Normal up vs Off IS Tolerant   |
| 221890_PM_at   | ZNF335    | zinc finger protein 335                                                               | 6.90E-05 | 1.56  | Normal up vs Off IS Tolerant   |
| 236946_PM_at   | ---       | ---                                                                                   | 6.91E-05 | 1.66  | Normal up vs Off IS Tolerant   |

|                 |              |                                                                                |          |       |                                |
|-----------------|--------------|--------------------------------------------------------------------------------|----------|-------|--------------------------------|
| 209164_PM_s_at  | CYB561       | cytochrome b-561                                                               | 6.93E-05 | 1.90  | Normal up vs Off IS Tolerant   |
| 243411_PM_at    | ---          | ---                                                                            | 6.94E-05 | -1.42 | Normal down vs Off IS Tolerant |
| 232919_PM_at    | LOC100289297 | Hypothetical protein LOC100289297                                              | 6.96E-05 | 2.05  | Normal up vs Off IS Tolerant   |
| 219806_PM_s_at  | C11orf75     | chromosome 11 open reading frame 75                                            | 7.08E-05 | -1.81 | Normal down vs Off IS Tolerant |
| 212968_PM_at    | RFNG         | RFNG O-fucosylpeptide 3-beta-N-acetylglucosaminyltransferase                   | 7.11E-05 | 1.63  | Normal up vs Off IS Tolerant   |
| 204588_PM_s_at  | SLC7A7       | solute carrier family 7 (cationic amino acid transporter, y+ system), member 7 | 7.12E-05 | -1.51 | Normal down vs Off IS Tolerant |
| 222031_PM_at    | LOC389906    | hypothetical LOC389906                                                         | 7.12E-05 | 1.57  | Normal up vs Off IS Tolerant   |
| 242962_PM_at    | ---          | ---                                                                            | 7.14E-05 | -1.29 | Normal down vs Off IS Tolerant |
| 241364_PM_at    | TMEM57       | transmembrane protein 57                                                       | 7.19E-05 | 1.65  | Normal up vs Off IS Tolerant   |
| 235520_PM_at    | ZNF280C      | zinc finger protein 280C                                                       | 7.30E-05 | 1.52  | Normal up vs Off IS Tolerant   |
| 205988_PM_at    | CD84         | CD84 molecule                                                                  | 7.30E-05 | 1.62  | Normal up vs Off IS Tolerant   |
| 233489_PM_at    | TMEM43       | Transmembrane protein 43                                                       | 7.39E-05 | -1.35 | Normal down vs Off IS Tolerant |
| 1556042_PM_s_at | LOC338799    | hypothetical LOC338799                                                         | 7.44E-05 | 1.64  | Normal up vs Off IS Tolerant   |
| 230998_PM_at    | ---          | ---                                                                            | 7.46E-05 | 1.83  | Normal up vs Off IS Tolerant   |
| 217995_PM_at    | SQRDL        | sulfide quinone reductase-like (yeast)                                         | 7.47E-05 | -1.50 | Normal down vs Off IS Tolerant |
| 210807_PM_s_at  | SLC16A7      | solute carrier family 16, member 7 (monocarboxylic acid transporter 2)         | 7.48E-05 | -1.43 | Normal down vs Off IS Tolerant |
| 203774_PM_at    | MTR          | 5-methyltetrahydrofolate-homocysteine methyltransferase                        | 7.50E-05 | 1.48  | Normal up vs Off IS Tolerant   |
| 215354_PM_s_at  | PELP1        | proline, glutamate and leucine rich protein 1                                  | 7.51E-05 | 1.44  | Normal up vs Off IS Tolerant   |
| 236754_PM_at    | PPP1R2       | protein phosphatase 1, regulatory (inhibitor) subunit 2                        | 7.51E-05 | 1.63  | Normal up vs Off IS Tolerant   |
| 238315_PM_s_at  | ZNF567       | zinc finger protein 567                                                        | 7.53E-05 | 1.75  | Normal up vs Off IS Tolerant   |
| 228955_PM_at    | ---          | ---                                                                            | 7.61E-05 | 1.97  | Normal up vs Off IS Tolerant   |



|                 |              |                                                                                         |          |       |                                |
|-----------------|--------------|-----------------------------------------------------------------------------------------|----------|-------|--------------------------------|
| 228131_PM_at    | ERCC1        | excision repair cross-complementing rodent repair deficiency, complementation group 1 ( | 7.64E-05 | 1.72  | Normal up vs Off IS Tolerant   |
| 210157_PM_at    | C19orf2      | chromosome 19 open reading frame 2                                                      | 7.67E-05 | 1.71  | Normal up vs Off IS Tolerant   |
| 1555131_PM_a_at | PER3         | period homolog 3 (Drosophila)                                                           | 7.75E-05 | -1.69 | Normal down vs Off IS Tolerant |
| 209867_PM_s_at  | LPHN3        | latrophilin 3                                                                           | 7.78E-05 | -1.63 | Normal down vs Off IS Tolerant |
| 241737_PM_x_at  | ---          | ---                                                                                     | 7.82E-05 | 1.77  | Normal up vs Off IS Tolerant   |
| 218362_PM_s_at  | DIS3         | DIS3 mitotic control homolog (S. cerevisiae)                                            | 7.84E-05 | 2.15  | Normal up vs Off IS Tolerant   |
| 236906_PM_x_at  | ---          | ---                                                                                     | 7.93E-05 | -1.67 | Normal down vs Off IS Tolerant |
| 1566870_PM_at   | ---          | ---                                                                                     | 7.99E-05 | -1.37 | Normal down vs Off IS Tolerant |
| 235918_PM_x_at  | CEP97        | centrosomal protein 97kDa                                                               | 8.06E-05 | 2.05  | Normal up vs Off IS Tolerant   |
| 228675_PM_at    | LOC100131733 | hypothetical LOC100131733                                                               | 8.13E-05 | 1.47  | Normal up vs Off IS Tolerant   |
| 234790_PM_at    | ---          | ---                                                                                     | 8.19E-05 | -1.34 | Normal down vs Off IS Tolerant |
| 235319_PM_at    | LOC100216546 | hypothetical LOC100216546                                                               | 8.21E-05 | -1.34 | Normal down vs Off IS Tolerant |
| 202898_PM_at    | SDC3         | syndecan 3                                                                              | 8.31E-05 | -1.36 | Normal down vs Off IS Tolerant |
| 214553_PM_s_at  | ARPP19       | cAMP-regulated phosphoprotein, 19kDa                                                    | 8.32E-05 | 2.04  | Normal up vs Off IS Tolerant   |
| 202617_PM_s_at  | MECP2        | methyl CpG binding protein 2 (Rett syndrome)                                            | 8.34E-05 | 1.57  | Normal up vs Off IS Tolerant   |
| 202798_PM_at    | SEC24B       | SEC24 family, member B (S. cerevisiae)                                                  | 8.35E-05 | 1.38  | Normal up vs Off IS Tolerant   |
| 202265_PM_at    | BMI1         | BMI1 polycomb ring finger oncogene                                                      | 8.48E-05 | 1.38  | Normal up vs Off IS Tolerant   |
| 218712_PM_at    | C1orf109     | chromosome 1 open reading frame 109                                                     | 8.49E-05 | 1.53  | Normal up vs Off IS Tolerant   |
| 234418_PM_x_at  | CD44         | CD44 molecule (Indian blood group)                                                      | 8.54E-05 | -1.50 | Normal down vs Off IS Tolerant |
| 222770_PM_s_at  | GUF1         | GUF1 GTPase homolog (S. cerevisiae)                                                     | 8.59E-05 | 1.78  | Normal up vs Off IS Tolerant   |

|                 |          |                                                                                       |          |       |                                |
|-----------------|----------|---------------------------------------------------------------------------------------|----------|-------|--------------------------------|
| 227409_PM_at    | PPP1R3E  | protein phosphatase 1, regulatory (inhibitor) subunit 3E                              | 8.65E-05 | 1.64  | Normal up vs Off IS Tolerant   |
| 1560826_PM_at   | ---      | ---                                                                                   | 8.65E-05 | -1.53 | Normal down vs Off IS Tolerant |
| 227006_PM_at    | PPP1R14A | protein phosphatase 1, regulatory (inhibitor) subunit 14A                             | 8.68E-05 | 1.67  | Normal up vs Off IS Tolerant   |
| 211543_PM_s_at  | GRK6     | G protein-coupled receptor kinase 6                                                   | 8.68E-05 | 1.65  | Normal up vs Off IS Tolerant   |
| 1556925_PM_at   | SMC3     | Structural maintenance of chromosomes 3                                               | 8.74E-05 | 1.59  | Normal up vs Off IS Tolerant   |
| 238707_PM_at    | ---      | ---                                                                                   | 8.78E-05 | 1.55  | Normal up vs Off IS Tolerant   |
| 227445_PM_at    | ZNF689   | zinc finger protein 689                                                               | 8.79E-05 | 1.67  | Normal up vs Off IS Tolerant   |
| 45633_PM_at     | GINS3    | GINS complex subunit 3 (Psf3 homolog)                                                 | 8.88E-05 | -1.36 | Normal down vs Off IS Tolerant |
| 203412_PM_at    | LZTR1    | leucine-zipper-like transcription regulator 1                                         | 8.90E-05 | 1.38  | Normal up vs Off IS Tolerant   |
| 206587_PM_at    | CCT6B    | chaperonin containing TCP1, subunit 6B (zeta 2)                                       | 8.90E-05 | 1.75  | Normal up vs Off IS Tolerant   |
| 226312_PM_at    | RICTOR   | RPTOR independent companion of MTOR, complex 2                                        | 8.94E-05 | 1.44  | Normal up vs Off IS Tolerant   |
| 241956_PM_at    | ---      | ---                                                                                   | 8.96E-05 | 1.91  | Normal up vs Off IS Tolerant   |
| 243133_PM_at    | TSC22D1  | TSC22 domain family, member 1                                                         | 9.02E-05 | -1.46 | Normal down vs Off IS Tolerant |
| 238479_PM_at    | DCUN1D5  | DCN1, defective in cullin neddylation 1, domain containing 5 ( <i>S. cerevisiae</i> ) | 9.02E-05 | 1.55  | Normal up vs Off IS Tolerant   |
| 1555579_PM_s_at | PTPRM    | protein tyrosine phosphatase, receptor type, M                                        | 9.05E-05 | 2.34  | Normal up vs Off IS Tolerant   |
| 221965_PM_at    | MPHOSPH9 | M-phase phosphoprotein 9                                                              | 9.06E-05 | 1.78  | Normal up vs Off IS Tolerant   |
| 227462_PM_at    | ERAP2    | endoplasmic reticulum aminopeptidase 2                                                | 9.14E-05 | 3.32  | Normal up vs Off IS Tolerant   |
| 201556_PM_s_at  | VAMP2    | vesicle-associated membrane protein 2 (synaptobrevin 2)                               | 9.15E-05 | 1.54  | Normal up vs Off IS Tolerant   |
| 228549_PM_at    | ---      | ---                                                                                   | 9.19E-05 | 1.94  | Normal up vs Off IS Tolerant   |
| 233267_PM_at    | SELENBP1 | Selenium binding protein 1                                                            | 9.26E-05 | -1.38 | Normal down vs Off IS Tolerant |
| 212289_PM_at    | ANKRD12  | ankyrin repeat domain 12                                                              | 9.33E-05 | 1.54  | Normal up vs Off IS Tolerant   |

|                 |              |                                                                                        |          |       |                                |
|-----------------|--------------|----------------------------------------------------------------------------------------|----------|-------|--------------------------------|
| 227729_PM_at    | ---          | ---                                                                                    | 9.36E-05 | 1.61  | Normal up vs Off IS Tolerant   |
| 214247_PM_s_at  | DKK3         | dickkopf homolog 3 (Xenopus laevis)                                                    | 9.37E-05 | 1.35  | Normal up vs Off IS Tolerant   |
| 210222_PM_s_at  | RTN1         | reticulon 1                                                                            | 9.48E-05 | -1.76 | Normal down vs Off IS Tolerant |
| 226449_PM_at    | CEP120       | centrosomal protein 120kDa                                                             | 9.54E-05 | 1.51  | Normal up vs Off IS Tolerant   |
| 1553423_PM_a_at | SLFN13       | schlafen family member 13                                                              | 9.61E-05 | 1.97  | Normal up vs Off IS Tolerant   |
| 218335_PM_x_at  | TNIP2        | TNFAIP3 interacting protein 2                                                          | 9.66E-05 | 1.30  | Normal up vs Off IS Tolerant   |
| 226135_PM_at    | UHRF1BP1     | UHRF1 binding protein 1                                                                | 9.66E-05 | 1.82  | Normal up vs Off IS Tolerant   |
| 216256_PM_at    | GRM8         | glutamate receptor, metabotropic 8                                                     | 9.68E-05 | -1.32 | Normal down vs Off IS Tolerant |
| 227444_PM_at    | ARMCX4       | armadillo repeat containing, X-linked 4                                                | 9.71E-05 | 1.77  | Normal up vs Off IS Tolerant   |
| 219240_PM_s_at  | C10orf88     | chromosome 10 open reading frame 88                                                    | 9.72E-05 | 1.75  | Normal up vs Off IS Tolerant   |
| 221698_PM_s_at  | CLEC7A       | C-type lectin domain family 7, member A                                                | 9.74E-05 | -1.49 | Normal down vs Off IS Tolerant |
| 225887_PM_at    | C13orf23     | chromosome 13 open reading frame 23                                                    | 9.77E-05 | 1.53  | Normal up vs Off IS Tolerant   |
| 1570354_PM_s_at | ZNF169       | zinc finger protein 169                                                                | 9.79E-05 | 1.39  | Normal up vs Off IS Tolerant   |
| 214394_PM_x_at  | EEF1D        | eukaryotic translation elongation factor 1 delta (guanine nucleotide exchange protein) | 9.80E-05 | 1.17  | Normal up vs Off IS Tolerant   |
| 212107_PM_s_at  | DHX9         | DEAH (Asp-Glu-Ala-His) box polypeptide 9                                               | 9.80E-05 | -1.55 | Normal down vs Off IS Tolerant |
| 221141_PM_x_at  | EPN1         | epsin 1                                                                                | 9.99E-05 | -1.63 | Normal down vs Off IS Tolerant |
| 202832_PM_at    | GCC2         | GRIP and coiled-coil domain containing 2                                               | 0.00010  | 1.62  | Normal up vs Off IS Tolerant   |
| 218735_PM_s_at  | ZNF544       | zinc finger protein 544                                                                | 0.00010  | 1.59  | Normal up vs Off IS Tolerant   |
| 214674_PM_at    | USP19        | ubiquitin specific peptidase 19                                                        | 0.00010  | 1.55  | Normal up vs Off IS Tolerant   |
| 1558626_PM_at   | LOC100287696 | Similar to ring finger protein 181                                                     | 0.00010  | 1.38  | Normal up vs Off IS Tolerant   |
| 224718_PM_at    | YY1          | YY1 transcription factor                                                               | 0.00010  | 1.29  | Normal up vs Off IS Tolerant   |
| 205120_PM_s_at  | SGCB         | sarcoglycan, beta (43kDa dystrophin-associated glycoprotein)                           | 0.00010  | 1.51  | Normal up vs Off IS Tolerant   |
| 204841_PM_s_at  | EEA1         | early endosome antigen 1                                                               | 0.00010  | -1.46 | Normal down vs Off IS Tolerant |

|                |          |                                                                                         |         |       |                                |
|----------------|----------|-----------------------------------------------------------------------------------------|---------|-------|--------------------------------|
| 220116_PM_at   | KCNN2    | potassium intermediate/small conductance calcium-activated channel, subfamily N, member | 0.00010 | -1.87 | Normal down vs Off IS Tolerant |
| 210113_PM_s_at | NLRP1    | NLR family, pyrin domain containing 1                                                   | 0.00010 | 1.36  | Normal up vs Off IS Tolerant   |
| 211908_PM_x_at | IGKV3-20 | Immunoglobulin kappa variable 3-20                                                      | 0.00010 | -1.53 | Normal down vs Off IS Tolerant |
| 216350_PM_s_at | ZNF10    | zinc finger protein 10                                                                  | 0.00010 | 2.10  | Normal up vs Off IS Tolerant   |
| 216555_PM_at   | C22orf30 | chromosome 22 open reading frame 30                                                     | 0.00011 | -1.51 | Normal down vs Off IS Tolerant |
| 228567_PM_at   | ---      | ---                                                                                     | 0.00011 | 1.55  | Normal up vs Off IS Tolerant   |
| 230322_PM_at   | NFAM1    | NFAT activating protein with ITAM motif 1                                               | 0.00011 | -1.52 | Normal down vs Off IS Tolerant |
| 227810_PM_at   | ZNF558   | zinc finger protein 558                                                                 | 0.00011 | 1.37  | Normal up vs Off IS Tolerant   |
| 1566032_PM_at  | ---      | ---                                                                                     | 0.00011 | -1.66 | Normal down vs Off IS Tolerant |
| 238975_PM_at   | MMAB     | methylmalonic aciduria (cobalamin deficiency) cblB type                                 | 0.00011 | 1.33  | Normal up vs Off IS Tolerant   |
| 221507_PM_at   | TNPO2    | transportin 2                                                                           | 0.00011 | 1.65  | Normal up vs Off IS Tolerant   |
| 218311_PM_at   | MAP4K3   | mitogen-activated protein kinase kinase kinase 3                                        | 0.00011 | 2.02  | Normal up vs Off IS Tolerant   |
| 226825_PM_s_at | TMEM165  | transmembrane protein 165                                                               | 0.00011 | -1.67 | Normal down vs Off IS Tolerant |
| 204788_PM_s_at | PPOX     | protoporphyrinogen oxidase                                                              | 0.00011 | 1.55  | Normal up vs Off IS Tolerant   |
| 237400_PM_at   | ATP5S    | ATP synthase, H+ transporting, mitochondrial F0 complex, subunit s (factor B)           | 0.00011 | 2.02  | Normal up vs Off IS Tolerant   |
| 203485_PM_at   | RTN1     | reticulon 1                                                                             | 0.00011 | -1.87 | Normal down vs Off IS Tolerant |
| 242035_PM_at   | ---      | ---                                                                                     | 0.00011 | 1.88  | Normal up vs Off IS Tolerant   |
| 231815_PM_at   | PHF12    | PHD finger protein 12                                                                   | 0.00011 | 1.49  | Normal up vs Off IS Tolerant   |
| 232249_PM_at   | FMNL3    | formin-like 3                                                                           | 0.00011 | -1.36 | Normal down vs Off IS Tolerant |
| 241124_PM_at   | ---      | ---                                                                                     | 0.00011 | -1.41 | Normal down vs Off IS Tolerant |

|                |                                                                                             |                                                                                         |         |       |                                |
|----------------|---------------------------------------------------------------------------------------------|-----------------------------------------------------------------------------------------|---------|-------|--------------------------------|
| 214219_PM_x_at | MAP4K1                                                                                      | mitogen-activated protein kinase kinase kinase kinase 1                                 | 0.00011 | 1.60  | Normal up vs Off IS Tolerant   |
| 226102_PM_at   | ---                                                                                         | ---                                                                                     | 0.00011 | 1.56  | Normal up vs Off IS Tolerant   |
| 235507_PM_at   | PCMTD1                                                                                      | protein-L-isoaspartate (D-aspartate) O-methyltransferase domain containing 1            | 0.00011 | -1.46 | Normal down vs Off IS Tolerant |
| 224784_PM_at   | MLLT6                                                                                       | myeloid/lymphoid or mixed-lineage leukemia (trithorax homolog, Drosophila); translocate | 0.00011 | 1.55  | Normal up vs Off IS Tolerant   |
| 239029_PM_at   | TMCC1                                                                                       | transmembrane and coiled-coil domain family 1                                           | 0.00011 | -1.34 | Normal down vs Off IS Tolerant |
| 242258_PM_at   | ---                                                                                         | ---                                                                                     | 0.00012 | 2.03  | Normal up vs Off IS Tolerant   |
| 224704_PM_at   | TNRC6A                                                                                      | trinucleotide repeat containing 6A                                                      | 0.00012 | 1.43  | Normal up vs Off IS Tolerant   |
| 209327_PM_s_at | NOP16                                                                                       | NOP16 nucleolar protein homolog (yeast)                                                 | 0.00012 | -1.33 | Normal down vs Off IS Tolerant |
| 1568915_PM_at  | ---                                                                                         | ---                                                                                     | 0.00012 | 1.40  | Normal up vs Off IS Tolerant   |
| 221666_PM_s_at | PYCARD                                                                                      | PYD and CARD domain containing                                                          | 0.00012 | -1.55 | Normal down vs Off IS Tolerant |
| 230640_PM_at   | ---                                                                                         | ---                                                                                     | 0.00012 | 1.79  | Normal up vs Off IS Tolerant   |
| 233197_PM_at   | KLHL9                                                                                       | kelch-like 9 (Drosophila)                                                               | 0.00012 | 1.50  | Normal up vs Off IS Tolerant   |
| 221992_PM_at   | LOC100507607 ///<br>LOC100507666 ///<br>LOC728734 ///<br>LOC728741 ///<br>NPIPL2 /// NPIPL3 | nuclear pore complex-interacting protein-like 3-like /// nuclear pore complex-interacti | 0.00012 | 2.62  | Normal up vs Off IS Tolerant   |
| 210373_PM_at   | NPRL2                                                                                       | nitrogen permease regulator-like 2 (S. cerevisiae)                                      | 0.00012 | 1.53  | Normal up vs Off IS Tolerant   |
| 212921_PM_at   | SMYD2                                                                                       | SET and MYND domain containing 2                                                        | 0.00012 | 1.66  | Normal up vs Off IS Tolerant   |
| 208278_PM_s_at | ---                                                                                         | ---                                                                                     | 0.00012 | -1.42 | Normal down vs Off IS Tolerant |
| 1554923_PM_at  | ANKS6                                                                                       | ankyrin repeat and sterile alpha motif domain containing 6                              | 0.00012 | 1.31  | Normal up vs Off IS Tolerant   |
| 244487_PM_at   | NCK1                                                                                        | NCK adaptor protein 1                                                                   | 0.00012 | 2.12  | Normal up vs Off IS Tolerant   |
| 222524_PM_s_at | ASB6                                                                                        | ankyrin repeat and SOCS box-containing 6                                                | 0.00012 | 1.60  | Normal up vs Off IS Tolerant   |

|                 |                                 |                                                                                        |         |       |                                |
|-----------------|---------------------------------|----------------------------------------------------------------------------------------|---------|-------|--------------------------------|
| 240513_PM_at    | EIF3M                           | Eukaryotic translation initiation factor 3, subunit M                                  | 0.00012 | 1.76  | Normal up vs Off IS Tolerant   |
| 219505_PM_at    | CECR1                           | cat eye syndrome chromosome region, candidate 1                                        | 0.00012 | -1.36 | Normal down vs Off IS Tolerant |
| 239777_PM_at    | C14orf182                       | chromosome 14 open reading frame 182                                                   | 0.00012 | 1.62  | Normal up vs Off IS Tolerant   |
| 1569129_PM_s_at | C3orf38                         | chromosome 3 open reading frame 38                                                     | 0.00012 | 2.15  | Normal up vs Off IS Tolerant   |
| 227213_PM_at    | ADAT2                           | adenosine deaminase, tRNA-specific 2, TAD2 homolog ( <i>S. cerevisiae</i> )            | 0.00012 | 1.65  | Normal up vs Off IS Tolerant   |
| 200912_PM_s_at  | EIF4A2                          | eukaryotic translation initiation factor 4A2                                           | 0.00012 | 1.19  | Normal up vs Off IS Tolerant   |
| 217520_PM_x_at  | LOC283683                       | hypothetical LOC283683                                                                 | 0.00012 | 1.55  | Normal up vs Off IS Tolerant   |
| 242772_PM_x_at  | ---                             | ---                                                                                    | 0.00012 | 2.04  | Normal up vs Off IS Tolerant   |
| 202414_PM_at    | ERCC5                           | excision repair cross-complementing rodent repair deficiency, complementation group 5  | 0.00013 | 1.36  | Normal up vs Off IS Tolerant   |
| 215135_PM_at    | DNPEP                           | aspartyl aminopeptidase                                                                | 0.00013 | 1.59  | Normal up vs Off IS Tolerant   |
| 223491_PM_at    | COMMD2                          | COMM domain containing 2                                                               | 0.00013 | 1.65  | Normal up vs Off IS Tolerant   |
| 221528_PM_s_at  | ELMO2                           | engulfment and cell motility 2                                                         | 0.00013 | 1.59  | Normal up vs Off IS Tolerant   |
| 203264_PM_s_at  | ARHGEF9                         | Cdc42 guanine nucleotide exchange factor (GEF) 9                                       | 0.00013 | 1.53  | Normal up vs Off IS Tolerant   |
| 222011_PM_s_at  | TCP1                            | t-complex 1                                                                            | 0.00013 | 1.76  | Normal up vs Off IS Tolerant   |
| 224180_PM_x_at  | C2orf86                         | chromosome 2 open reading frame 86                                                     | 0.00013 | 1.61  | Normal up vs Off IS Tolerant   |
| 208282_PM_x_at  | DAZ1 /// DAZ2 /// DAZ3 /// DAZ4 | deleted in azoospermia 1 /// deleted in azoospermia 2 /// deleted in azoospermia 3 /// | 0.00013 | -1.39 | Normal down vs Off IS Tolerant |
| 222034_PM_at    | GNB2L1                          | guanine nucleotide binding protein (G protein), beta polypeptide 2-like 1              | 0.00013 | 1.77  | Normal up vs Off IS Tolerant   |
| 221905_PM_at    | CYLD                            | cylindromatosis (turban tumor syndrome)                                                | 0.00013 | 1.45  | Normal up vs Off IS Tolerant   |
| 1554456_PM_a_at | LINS                            | lines homolog ( <i>Drosophila</i> )                                                    | 0.00013 | 2.19  | Normal up vs Off IS Tolerant   |
| 229770_PM_at    | GLT1D1                          | glycosyltransferase 1 domain containing 1                                              | 0.00013 | -1.83 | Normal down vs Off IS Tolerant |
| 240642_PM_at    | ZMYM2                           | zinc finger, MYM-type 2                                                                | 0.00013 | -1.47 | Normal down vs Off IS Tolerant |

|                |         |                                                         |         |       |                                |
|----------------|---------|---------------------------------------------------------|---------|-------|--------------------------------|
| 205663_PM_at   | PCBP3   | poly(rC) binding protein 3                              | 0.00013 | -1.31 | Normal down vs Off IS Tolerant |
| 236022_PM_at   | MYO19   | myosin XIX                                              | 0.00013 | 1.86  | Normal up vs Off IS Tolerant   |
| 218826_PM_at   | SLC35F2 | solute carrier family 35, member F2                     | 0.00013 | 1.85  | Normal up vs Off IS Tolerant   |
| 223458_PM_at   | SEZ6L2  | seizure related 6 homolog (mouse)-like 2                | 0.00013 | -1.37 | Normal down vs Off IS Tolerant |
| 214339_PM_s_at | MAP4K1  | mitogen-activated protein kinase kinase kinase kinase 1 | 0.00013 | 1.48  | Normal up vs Off IS Tolerant   |
| 227381_PM_at   | CERCAM  | Cerebral endothelial cell adhesion molecule             | 0.00013 | -1.30 | Normal down vs Off IS Tolerant |
| 235611_PM_at   | SREK1   | splicing regulatory glutamine/lysine-rich protein 1     | 0.00013 | 1.98  | Normal up vs Off IS Tolerant   |
| 202435_PM_s_at | CYP1B1  | cytochrome P450, family 1, subfamily B, polypeptide 1   | 0.00014 | -2.66 | Normal down vs Off IS Tolerant |
| 200727_PM_s_at | ACTR2   | ARP2 actin-related protein 2 homolog (yeast)            | 0.00014 | -1.68 | Normal down vs Off IS Tolerant |
| 156525_PM_a_at | TCP11L2 | t-complex 11 (mouse)-like 2                             | 0.00014 | 2.18  | Normal up vs Off IS Tolerant   |
| 203623_PM_at   | PLXNA3  | plexin A3                                               | 0.00014 | 1.26  | Normal up vs Off IS Tolerant   |
| 240222_PM_at   | ---     | ---                                                     | 0.00014 | 1.62  | Normal up vs Off IS Tolerant   |
| 226307_PM_at   | CRTC2   | CREB regulated transcription coactivator 2              | 0.00014 | 1.45  | Normal up vs Off IS Tolerant   |
| 233246_PM_at   | ---     | ---                                                     | 0.00014 | 1.56  | Normal up vs Off IS Tolerant   |
| 237453_PM_at   | ZNF529  | zinc finger protein 529                                 | 0.00014 | 1.25  | Normal up vs Off IS Tolerant   |
| 222788_PM_s_at | RSBN1   | round spermatid basic protein 1                         | 0.00014 | 1.33  | Normal up vs Off IS Tolerant   |
| 244696_PM_at   | ---     | ---                                                     | 0.00014 | -2.17 | Normal down vs Off IS Tolerant |
| 230360_PM_at   | GLDN    | gliomedin                                               | 0.00014 | -1.34 | Normal down vs Off IS Tolerant |
| 220953_PM_s_at | MTMR12  | myotubularin related protein 12                         | 0.00014 | 1.90  | Normal up vs Off IS Tolerant   |
| 218482_PM_at   | ENY2    | enhancer of yellow 2 homolog (Drosophila)               | 0.00014 | -1.31 | Normal down vs Off IS Tolerant |
| 201550_PM_x_at | ACTG1   | actin, gamma 1                                          | 0.00014 | -1.14 | Normal down vs Off IS Tolerant |
| 204743_PM_at   | TAGLN3  | transgelin 3                                            | 0.00014 | -1.38 | Normal down vs Off IS Tolerant |

|                 |                      |                                                                                                |         |       |                                |
|-----------------|----------------------|------------------------------------------------------------------------------------------------|---------|-------|--------------------------------|
| 1564334_PM_at   | ---                  | ---                                                                                            | 0.00014 | 1.32  | Normal up vs Off IS Tolerant   |
| 218570_PM_at    | KBTBD4 ///<br>PTPMT1 | kelch repeat and BTB (POZ) domain<br>containing 4 /// protein tyrosine<br>phosphatase, mitocho | 0.00014 | 1.74  | Normal up vs Off IS Tolerant   |
| 220613_PM_s_at  | SYTL2                | synaptotagmin-like 2                                                                           | 0.00014 | 1.74  | Normal up vs Off IS Tolerant   |
| 215855_PM_s_at  | TMF1                 | TATA element modulatory factor 1                                                               | 0.00014 | 1.78  | Normal up vs Off IS Tolerant   |
| 219840_PM_s_at  | TCL6                 | T-cell leukemia/lymphoma 6 (non-<br>protein coding)                                            | 0.00014 | -1.49 | Normal down vs Off IS Tolerant |
| 1557532_PM_at   | NDUFA7               | NADH dehydrogenase (ubiquinone) 1<br>alpha subcomplex, 7, 14.5kDa                              | 0.00015 | 1.36  | Normal up vs Off IS Tolerant   |
| 1556452_PM_a_at | LOC283761            | hypothetical LOC283761                                                                         | 0.00015 | -1.28 | Normal down vs Off IS Tolerant |
| 224947_PM_at    | RNF26                | ring finger protein 26                                                                         | 0.00015 | 1.44  | Normal up vs Off IS Tolerant   |
| 220839_PM_at    | METTL5               | methyltransferase like 5                                                                       | 0.00015 | 1.58  | Normal up vs Off IS Tolerant   |
| 223066_PM_at    | SNAPIN               | SNAP-associated protein                                                                        | 0.00015 | -1.65 | Normal down vs Off IS Tolerant |
| 204155_PM_s_at  | SIK3                 | SIK family kinase 3                                                                            | 0.00015 | 1.51  | Normal up vs Off IS Tolerant   |
| 213645_PM_at    | ENOSF1               | enolase superfamily member 1                                                                   | 0.00015 | 2.47  | Normal up vs Off IS Tolerant   |
| 219098_PM_at    | MYBBP1A              | MYB binding protein (P160) 1a                                                                  | 0.00015 | 1.44  | Normal up vs Off IS Tolerant   |
| 227775_PM_at    | CELF6                | CUGBP, Elav-like family member 6                                                               | 0.00015 | 1.49  | Normal up vs Off IS Tolerant   |
| 221499_PM_s_at  | STX16                | syntaxin 16                                                                                    | 0.00015 | 1.42  | Normal up vs Off IS Tolerant   |
| 65770_PM_at     | RHOT2                | ras homolog gene family, member T2                                                             | 0.00015 | 1.32  | Normal up vs Off IS Tolerant   |
| 1560028_PM_at   | C11orf57             | chromosome 11 open reading frame 57                                                            | 0.00015 | 1.73  | Normal up vs Off IS Tolerant   |
| 244347_PM_at    | ---                  | ---                                                                                            | 0.00015 | 1.89  | Normal up vs Off IS Tolerant   |
| 238012_PM_at    | DPP7                 | Dipeptidyl-peptidase 7                                                                         | 0.00015 | 1.75  | Normal up vs Off IS Tolerant   |
| 210084_PM_x_at  | TPSAB1               | tryptase alpha/beta 1                                                                          | 0.00015 | -1.29 | Normal down vs Off IS Tolerant |
| 233478_PM_at    | ---                  | ---                                                                                            | 0.00015 | -1.39 | Normal down vs Off IS Tolerant |
| 226344_PM_at    | ZMAT1                | zinc finger, matrin-type 1                                                                     | 0.00015 | 1.77  | Normal up vs Off IS Tolerant   |
| 206837_PM_at    | ALX1                 | ALX homeobox 1                                                                                 | 0.00015 | -1.69 | Normal down vs Off IS Tolerant |
| 218164_PM_at    | SPATA20              | spermatogenesis associated 20                                                                  | 0.00015 | 1.89  | Normal up vs Off IS Tolerant   |



|                 |                         |                                                                                        |         |       |                                |
|-----------------|-------------------------|----------------------------------------------------------------------------------------|---------|-------|--------------------------------|
| 230395_PM_at    | ---                     | ---                                                                                    | 0.00015 | -1.50 | Normal down vs Off IS Tolerant |
| 1563498_PM_s_at | SLC25A45                | solute carrier family 25, member 45                                                    | 0.00015 | 1.80  | Normal up vs Off IS Tolerant   |
| 213400_PM_s_at  | TBL1X                   | transducin (beta)-like 1X-linked                                                       | 0.00016 | -1.21 | Normal down vs Off IS Tolerant |
| 232125_PM_at    | ---                     | ---                                                                                    | 0.00016 | 1.63  | Normal up vs Off IS Tolerant   |
| 210129_PM_s_at  | TTLL3                   | tubulin tyrosine ligase-like family, member 3                                          | 0.00016 | 1.48  | Normal up vs Off IS Tolerant   |
| 214409_PM_at    | RFPL3S                  | RFPL3 antisense RNA (non-protein coding)                                               | 0.00016 | 1.62  | Normal up vs Off IS Tolerant   |
| 229575_PM_at    | ---                     | ---                                                                                    | 0.00016 | 1.64  | Normal up vs Off IS Tolerant   |
| 205854_PM_at    | TULP3                   | tubby like protein 3                                                                   | 0.00016 | 1.50  | Normal up vs Off IS Tolerant   |
| 234760_PM_at    | ---                     | ---                                                                                    | 0.00016 | -1.31 | Normal down vs Off IS Tolerant |
| 200655_PM_s_at  | CALM1                   | calmodulin 1 (phosphorylase kinase, delta)                                             | 0.00016 | 1.23  | Normal up vs Off IS Tolerant   |
| 1557514_PM_a_at | ---                     | ---                                                                                    | 0.00016 | -1.47 | Normal down vs Off IS Tolerant |
| 228259_PM_s_at  | ---                     | ---                                                                                    | 0.00016 | 1.76  | Normal up vs Off IS Tolerant   |
| 1554489_PM_a_at | CEP70                   | centrosomal protein 70kDa                                                              | 0.00016 | 1.42  | Normal up vs Off IS Tolerant   |
| 204508_PM_s_at  | CA12                    | carbonic anhydrase XII                                                                 | 0.00016 | -1.35 | Normal down vs Off IS Tolerant |
| 213278_PM_at    | MTMR9                   | myotubularin related protein 9                                                         | 0.00016 | 1.45  | Normal up vs Off IS Tolerant   |
| 235920_PM_at    | ---                     | ---                                                                                    | 0.00016 | 1.73  | Normal up vs Off IS Tolerant   |
| 239553_PM_at    | LOC729420               | hypothetical LOC729420                                                                 | 0.00016 | -1.26 | Normal down vs Off IS Tolerant |
| 221581_PM_s_at  | LAT2                    | linker for activation of T cells family, member 2                                      | 0.00016 | -1.59 | Normal down vs Off IS Tolerant |
| 206274_PM_s_at  | CROCC                   | ciliary rootlet coiled-coil, rootletin                                                 | 0.00016 | 1.33  | Normal up vs Off IS Tolerant   |
| 210070_PM_s_at  | CHKB-CPT1B ///<br>CPT1B | choline kinase-like, carnitine palmitoyltransferase 1B (muscle) transcription unit /// | 0.00016 | 2.19  | Normal up vs Off IS Tolerant   |
| 1560034_PM_a_at | ---                     | ---                                                                                    | 0.00016 | -1.68 | Normal down vs Off IS Tolerant |

|                 |              |                                                                                         |         |       |                                |
|-----------------|--------------|-----------------------------------------------------------------------------------------|---------|-------|--------------------------------|
| 226591_PM_at    | SNRPN        | small nuclear ribonucleoprotein polypeptide N                                           | 0.00016 | 2.35  | Normal up vs Off IS Tolerant   |
| 206857_PM_s_at  | FKBP1B       | FK506 binding protein 1B, 12.6 kDa                                                      | 0.00017 | 2.24  | Normal up vs Off IS Tolerant   |
| 239437_PM_at    | ---          | ---                                                                                     | 0.00017 | 1.55  | Normal up vs Off IS Tolerant   |
| 218673_PM_s_at  | ATG7         | ATG7 autophagy related 7 homolog (S. cerevisiae)                                        | 0.00017 | -1.63 | Normal down vs Off IS Tolerant |
| 234976_PM_x_at  | MTHFD2       | methylenetetrahydrofolate dehydrogenase (NADP+ dependent) 2, methenyltetrahydrofolate c | 0.00017 | -1.36 | Normal down vs Off IS Tolerant |
| 243824_PM_at    | LOC100505956 | hypothetical LOC100505956                                                               | 0.00017 | -2.30 | Normal down vs Off IS Tolerant |
| 240170_PM_at    | ---          | ---                                                                                     | 0.00017 | 1.64  | Normal up vs Off IS Tolerant   |
| 228583_PM_at    | LIN52        | lin-52 homolog (C. elegans)                                                             | 0.00017 | 1.91  | Normal up vs Off IS Tolerant   |
| 211386_PM_at    | MGC12488     | hypothetical protein MGC12488                                                           | 0.00017 | 2.13  | Normal up vs Off IS Tolerant   |
| 1563696_PM_at   | HSD17B4      | Hydroxysteroid (17-beta) dehydrogenase 4                                                | 0.00017 | -1.87 | Normal down vs Off IS Tolerant |
| 1558154_PM_at   | ---          | ---                                                                                     | 0.00017 | 2.10  | Normal up vs Off IS Tolerant   |
| 238929_PM_at    | SRSF8        | serine/arginine-rich splicing factor 8                                                  | 0.00017 | 1.85  | Normal up vs Off IS Tolerant   |
| 1553099_PM_at   | TIGD1        | tigger transposable element derived 1                                                   | 0.00017 | 2.02  | Normal up vs Off IS Tolerant   |
| 1570424_PM_at   | ---          | ---                                                                                     | 0.00017 | -1.30 | Normal down vs Off IS Tolerant |
| 238070_PM_at    | ---          | ---                                                                                     | 0.00017 | 1.64  | Normal up vs Off IS Tolerant   |
| 204328_PM_at    | TMC6         | transmembrane channel-like 6                                                            | 0.00017 | 1.37  | Normal up vs Off IS Tolerant   |
| 237750_PM_at    | XPNPEP3      | X-prolyl aminopeptidase (aminopeptidase P) 3, putative                                  | 0.00017 | 1.53  | Normal up vs Off IS Tolerant   |
| 211660_PM_at    | POU2F2       | POU class 2 homeobox 2                                                                  | 0.00017 | -1.59 | Normal down vs Off IS Tolerant |
| 213587_PM_s_at  | ATP6V0E2     | ATPase, H+ transporting V0 subunit e2                                                   | 0.00017 | 1.85  | Normal up vs Off IS Tolerant   |
| 202524_PM_s_at  | SPOCK2       | sparc/osteonectin, cwcv and kazal-like domains proteoglycan (testican) 2                | 0.00017 | 1.83  | Normal up vs Off IS Tolerant   |
| 218473_PM_s_at  | GLT25D1      | glycosyltransferase 25 domain containing 1                                              | 0.00017 | -1.33 | Normal down vs Off IS Tolerant |
| 1553701_PM_a_at | DUSP18       | dual specificity phosphatase 18                                                         | 0.00018 | -1.46 | Normal down vs Off IS Tolerant |
| 238583_PM_at    | MSRB3        | methionine sulfoxide reductase B3                                                       | 0.00018 | 1.32  | Normal up vs Off IS Tolerant   |

|                 |           |                                                                                      |         |       |                                |
|-----------------|-----------|--------------------------------------------------------------------------------------|---------|-------|--------------------------------|
| 209654_PM_at    | KIAA0947  | KIAA0947                                                                             | 0.00018 | 1.38  | Normal up vs Off IS Tolerant   |
| 1569110_PM_x_at | LOC728613 | programmed cell death 6 pseudogene                                                   | 0.00018 | 2.90  | Normal up vs Off IS Tolerant   |
| 211983_PM_x_at  | ACTG1     | actin, gamma 1                                                                       | 0.00018 | -1.12 | Normal down vs Off IS Tolerant |
| 203938_PM_s_at  | TAF1C     | TATA box binding protein (TBP)-<br>associated factor, RNA polymerase I, C,<br>110kDa | 0.00018 | 1.34  | Normal up vs Off IS Tolerant   |
| 221318_PM_at    | NEUROD4   | neurogenic differentiation 4                                                         | 0.00018 | -1.30 | Normal down vs Off IS Tolerant |
| 232433_PM_at    | KIAA1683  | KIAA1683                                                                             | 0.00018 | -1.44 | Normal down vs Off IS Tolerant |
| 226508_PM_at    | PHC3      | polyhomeotic homolog 3 (Drosophila)                                                  | 0.00018 | 1.41  | Normal up vs Off IS Tolerant   |
| 203371_PM_s_at  | NDUFB3    | NADH dehydrogenase (ubiquinone) 1<br>beta subcomplex, 3, 12kDa                       | 0.00018 | -1.44 | Normal down vs Off IS Tolerant |
| 228174_PM_at    | SCAI      | suppressor of cancer cell invasion                                                   | 0.00018 | 1.83  | Normal up vs Off IS Tolerant   |
| 229411_PM_at    | PNCK      | pregnancy up-regulated non-ubiquitously<br>expressed CaM kinase                      | 0.00018 | -1.27 | Normal down vs Off IS Tolerant |
| 237048_PM_at    | ---       | ---                                                                                  | 0.00018 | 1.39  | Normal up vs Off IS Tolerant   |
| 55081_PM_at     | MICALL1   | MICAL-like 1                                                                         | 0.00018 | 1.75  | Normal up vs Off IS Tolerant   |
| 226855_PM_at    | ---       | ---                                                                                  | 0.00019 | 1.35  | Normal up vs Off IS Tolerant   |
| 219125_PM_s_at  | RAG1AP1   | recombination activating gene 1<br>activating protein 1                              | 0.00019 | 1.44  | Normal up vs Off IS Tolerant   |
| 1554007_PM_at   | ---       | ---                                                                                  | 0.00019 | 2.00  | Normal up vs Off IS Tolerant   |
| 212957_PM_s_at  | LOC92249  | hypothetical LOC92249                                                                | 0.00019 | 1.51  | Normal up vs Off IS Tolerant   |
| 215616_PM_s_at  | KDM4B     | lysine (K)-specific demethylase 4B                                                   | 0.00019 | -1.41 | Normal down vs Off IS Tolerant |
| 227797_PM_x_at  | LYRM2     | LYR motif containing 2                                                               | 0.00019 | -1.64 | Normal down vs Off IS Tolerant |
| 228454_PM_at    | LCOR      | ligand dependent nuclear receptor<br>corepressor                                     | 0.00019 | 1.42  | Normal up vs Off IS Tolerant   |
| 228915_PM_at    | DACH1     | dachshund homolog 1 (Drosophila)                                                     | 0.00019 | -1.64 | Normal down vs Off IS Tolerant |
| 200900_PM_s_at  | M6PR      | mannose-6-phosphate receptor (cation<br>dependent)                                   | 0.00019 | -1.45 | Normal down vs Off IS Tolerant |

|                 |          |                                                                                         |         |       |                                |
|-----------------|----------|-----------------------------------------------------------------------------------------|---------|-------|--------------------------------|
| 230758_PM_at    | GEMIN8   | gem (nuclear organelle) associated protein 8                                            | 0.00019 | 1.49  | Normal up vs Off IS Tolerant   |
| 228320_PM_x_at  | CCDC64   | coiled-coil domain containing 64                                                        | 0.00019 | 1.80  | Normal up vs Off IS Tolerant   |
| 213642_PM_at    | ---      | ---                                                                                     | 0.00019 | -1.73 | Normal down vs Off IS Tolerant |
| 207564_PM_x_at  | OGT      | O-linked N-acetylglucosamine (GlcNAc) transferase (UDP-N-acetylglucosamine:polypeptide- | 0.00020 | 1.42  | Normal up vs Off IS Tolerant   |
| 201085_PM_s_at  | SON      | SON DNA binding protein                                                                 | 0.00020 | -1.25 | Normal down vs Off IS Tolerant |
| 206621_PM_s_at  | EIF4H    | eukaryotic translation initiation factor 4H                                             | 0.00020 | 1.29  | Normal up vs Off IS Tolerant   |
| 202365_PM_at    | UNC119B  | unc-119 homolog B (C. elegans)                                                          | 0.00020 | 1.69  | Normal up vs Off IS Tolerant   |
| 229420_PM_at    | ---      | ---                                                                                     | 0.00020 | -1.94 | Normal down vs Off IS Tolerant |
| 225616_PM_at    | SPRYD4   | SPRY domain containing 4                                                                | 0.00020 | -1.36 | Normal down vs Off IS Tolerant |
| 1559324_PM_at   | CCDC144C | Coiled-coil domain containing 144C                                                      | 0.00020 | -1.52 | Normal down vs Off IS Tolerant |
| 242640_PM_at    | C19orf55 | chromosome 19 open reading frame 55                                                     | 0.00020 | 1.26  | Normal up vs Off IS Tolerant   |
| 37462_PM_i_at   | SF3A2    | splicing factor 3a, subunit 2, 66kDa                                                    | 0.00020 | 1.67  | Normal up vs Off IS Tolerant   |
| 1554019_PM_s_at | CEP57L1  | centrosomal protein 57kDa-like 1                                                        | 0.00020 | -1.61 | Normal down vs Off IS Tolerant |
| 225421_PM_at    | PM20D2   | peptidase M20 domain containing 2                                                       | 0.00020 | 1.93  | Normal up vs Off IS Tolerant   |
| 229759_PM_s_at  | VEPH1    | ventricular zone expressed PH domain homolog 1 (zebrafish)                              | 0.00021 | 1.39  | Normal up vs Off IS Tolerant   |
| 210316_PM_at    | FLT4     | fms-related tyrosine kinase 4                                                           | 0.00021 | 1.25  | Normal up vs Off IS Tolerant   |
| 244352_PM_at    | CD84     | CD84 molecule                                                                           | 0.00021 | 1.64  | Normal up vs Off IS Tolerant   |
| 1566271_PM_x_at | RALGAPA1 | Ral GTPase activating protein, alpha subunit 1 (catalytic)                              | 0.00021 | -1.90 | Normal down vs Off IS Tolerant |
| 215364_PM_s_at  | KIAA0467 | KIAA0467                                                                                | 0.00021 | 1.43  | Normal up vs Off IS Tolerant   |
| 241962_PM_at    | ---      | ---                                                                                     | 0.00021 | 1.38  | Normal up vs Off IS Tolerant   |
| 201704_PM_at    | ENTPD6   | ectonucleoside triphosphate diphosphohydrolase 6 (putative)                             | 0.00021 | 1.35  | Normal up vs Off IS Tolerant   |

|                |              |                                                                                     |         |       |                                |
|----------------|--------------|-------------------------------------------------------------------------------------|---------|-------|--------------------------------|
| 201230_PM_s_at | ARIH2        | ariadne homolog 2 (Drosophila)                                                      | 0.00021 | 1.29  | Normal up vs Off IS Tolerant   |
| 203123_PM_s_at | SLC11A2      | solute carrier family 11 (proton-coupled divalent metal ion transporters), member 2 | 0.00022 | 1.70  | Normal up vs Off IS Tolerant   |
| 235900_PM_at   | SPNS3        | spinster homolog 3 (Drosophila)                                                     | 0.00022 | 1.42  | Normal up vs Off IS Tolerant   |
| 238692_PM_at   | BTBD11       | BTB (POZ) domain containing 11                                                      | 0.00022 | 1.64  | Normal up vs Off IS Tolerant   |
| 217696_PM_at   | FUT7         | fucosyltransferase 7 (alpha (1,3) fucosyltransferase)                               | 0.00022 | -1.44 | Normal down vs Off IS Tolerant |
| 202838_PM_at   | FUCA1        | fucosidase, alpha-L- 1, tissue                                                      | 0.00022 | -1.61 | Normal down vs Off IS Tolerant |
| 228921_PM_at   | SLC25A42     | solute carrier family 25, member 42                                                 | 0.00022 | 1.39  | Normal up vs Off IS Tolerant   |
| 207753_PM_at   | ZNF304       | zinc finger protein 304                                                             | 0.00022 | 1.69  | Normal up vs Off IS Tolerant   |
| 227701_PM_at   | C10orf118    | chromosome 10 open reading frame 118                                                | 0.00022 | 1.67  | Normal up vs Off IS Tolerant   |
| 227255_PM_at   | PDIK1L       | PDLIM1 interacting kinase 1 like                                                    | 0.00022 | 1.69  | Normal up vs Off IS Tolerant   |
| 201114_PM_x_at | PSMA7        | proteasome (prosome, macropain) subunit, alpha type, 7                              | 0.00022 | -1.25 | Normal down vs Off IS Tolerant |
| 239284_PM_at   | ---          | ---                                                                                 | 0.00022 | -1.45 | Normal down vs Off IS Tolerant |
| 227389_PM_x_at | ---          | ---                                                                                 | 0.00022 | -1.53 | Normal down vs Off IS Tolerant |
| 225945_PM_at   | ZNF655       | zinc finger protein 655                                                             | 0.00022 | 1.32  | Normal up vs Off IS Tolerant   |
| 234456_PM_at   | TRAPPC4      | trafficking protein particle complex 4                                              | 0.00022 | -1.31 | Normal down vs Off IS Tolerant |
| 236566_PM_at   | ---          | ---                                                                                 | 0.00022 | 1.42  | Normal up vs Off IS Tolerant   |
| 47773_PM_at    | FBXO42       | F-box protein 42                                                                    | 0.00023 | 1.72  | Normal up vs Off IS Tolerant   |
| 243322_PM_at   | ---          | ---                                                                                 | 0.00023 | -1.53 | Normal down vs Off IS Tolerant |
| 205863_PM_at   | S100A12      | S100 calcium binding protein A12                                                    | 0.00023 | -1.85 | Normal down vs Off IS Tolerant |
| 204816_PM_s_at | DHX34        | DEAH (Asp-Glu-Ala-His) box polypeptide 34                                           | 0.00023 | -1.27 | Normal down vs Off IS Tolerant |
| 241568_PM_at   | LOC100506319 | hypothetical LOC100506319                                                           | 0.00023 | -1.30 | Normal down vs Off IS Tolerant |
| 207624_PM_s_at | RPGR         | retinitis pigmentosa GTPase regulator                                               | 0.00023 | 1.85  | Normal up vs Off IS Tolerant   |

|                 |              |                                                                 |         |       |                                |
|-----------------|--------------|-----------------------------------------------------------------|---------|-------|--------------------------------|
| 225740_PM_x_at  | MDM4         | Mdm4 p53 binding protein homolog (mouse)                        | 0.00023 | 1.34  | Normal up vs Off IS Tolerant   |
| 225417_PM_at    | EPC1         | enhancer of polycomb homolog 1 (Drosophila)                     | 0.00023 | 1.46  | Normal up vs Off IS Tolerant   |
| 1559835_PM_at   | ---          | ---                                                             | 0.00023 | -1.88 | Normal down vs Off IS Tolerant |
| 208595_PM_s_at  | MBD1         | methyl-CpG binding domain protein 1                             | 0.00023 | 1.47  | Normal up vs Off IS Tolerant   |
| 1569157_PM_s_at | ZNF846       | zinc finger protein 846                                         | 0.00023 | 1.91  | Normal up vs Off IS Tolerant   |
| 1552312_PM_a_at | MFAP3        | microfibrillar-associated protein 3                             | 0.00024 | -1.54 | Normal down vs Off IS Tolerant |
| 205146_PM_x_at  | APBA3        | amyloid beta (A4) precursor protein-binding, family A, member 3 | 0.00024 | 1.38  | Normal up vs Off IS Tolerant   |
| 237046_PM_x_at  | IL34         | interleukin 34                                                  | 0.00024 | -1.47 | Normal down vs Off IS Tolerant |
| 239808_PM_at    | ---          | ---                                                             | 0.00024 | 2.32  | Normal up vs Off IS Tolerant   |
| 216830_PM_at    | LOC100508624 | e3 ubiquitin-protein ligase HERC2-like                          | 0.00024 | -1.46 | Normal down vs Off IS Tolerant |
| 224709_PM_s_at  | CDC42SE2     | CDC42 small effector 2                                          | 0.00024 | 1.30  | Normal up vs Off IS Tolerant   |
| 218456_PM_at    | CAPRIN2      | caprin family member 2                                          | 0.00024 | 1.43  | Normal up vs Off IS Tolerant   |
| 219337_PM_at    | C1orf159     | chromosome 1 open reading frame 159                             | 0.00024 | 1.37  | Normal up vs Off IS Tolerant   |
| 238910_PM_at    | ---          | ---                                                             | 0.00024 | 1.83  | Normal up vs Off IS Tolerant   |
| 237736_PM_at    | ---          | ---                                                             | 0.00024 | -1.35 | Normal down vs Off IS Tolerant |
| 232648_PM_at    | PSMA3        | proteasome (prosome, macropain) subunit, alpha type, 3          | 0.00025 | 1.67  | Normal up vs Off IS Tolerant   |
| 1568248_PM_x_at | SNORA71B     | small nucleolar RNA, H/ACA box 71B                              | 0.00025 | -1.50 | Normal down vs Off IS Tolerant |
| 223773_PM_s_at  | SNHG12       | small nucleolar RNA host gene 12 (non-protein coding)           | 0.00025 | 1.53  | Normal up vs Off IS Tolerant   |
| 214717_PM_at    | PK155        | hypothetical protein DKFZp434H1419                              | 0.00025 | 1.56  | Normal up vs Off IS Tolerant   |
| 214043_PM_at    | PTPRD        | protein tyrosine phosphatase, receptor type, D                  | 0.00025 | -2.19 | Normal down vs Off IS Tolerant |
| 212693_PM_at    | MDN1         | MDN1, midasin homolog (yeast)                                   | 0.00025 | 1.40  | Normal up vs Off IS Tolerant   |
| 218172_PM_s_at  | DERL1        | Der1-like domain family, member 1                               | 0.00025 | 1.79  | Normal up vs Off IS Tolerant   |

|                 |          |                                                                                 |         |       |                                |
|-----------------|----------|---------------------------------------------------------------------------------|---------|-------|--------------------------------|
| 235365_PM_at    | DFNB59   | deafness, autosomal recessive 59                                                | 0.00025 | 1.46  | Normal up vs Off IS Tolerant   |
| 221536_PM_s_at  | LSG1     | large subunit GTPase 1 homolog (S. cerevisiae)                                  | 0.00025 | 1.59  | Normal up vs Off IS Tolerant   |
| 1553990_PM_at   | C16orf79 | chromosome 16 open reading frame 79                                             | 0.00025 | 1.49  | Normal up vs Off IS Tolerant   |
| 214582_PM_at    | PDE3B    | phosphodiesterase 3B, cGMP-inhibited                                            | 0.00025 | 2.11  | Normal up vs Off IS Tolerant   |
| 207528_PM_s_at  | SLC7A11  | solute carrier family 7, (cationic amino acid transporter, y+ system) member 11 | 0.00025 | -1.49 | Normal down vs Off IS Tolerant |
| 202915_PM_s_at  | FAM20B   | family with sequence similarity 20, member B                                    | 0.00026 | 1.68  | Normal up vs Off IS Tolerant   |
| 227007_PM_at    | TMCO4    | transmembrane and coiled-coil domains 4                                         | 0.00026 | 1.58  | Normal up vs Off IS Tolerant   |
| 226889_PM_at    | WDR35    | WD repeat domain 35                                                             | 0.00026 | 1.45  | Normal up vs Off IS Tolerant   |
| 223501_PM_at    | TNFSF13B | tumor necrosis factor (ligand) superfamily, member 13b                          | 0.00026 | -1.58 | Normal down vs Off IS Tolerant |
| 1555866_PM_a_at | HEXDC    | hexosaminidase (glycosyl hydrolase family 20, catalytic domain) containing      | 0.00026 | 1.52  | Normal up vs Off IS Tolerant   |
| 212044_PM_s_at  | RPL27A   | Ribosomal protein L27a                                                          | 0.00026 | -1.77 | Normal down vs Off IS Tolerant |
| 213683_PM_at    | ACSL6    | acyl-CoA synthetase long-chain family member 6                                  | 0.00026 | 1.52  | Normal up vs Off IS Tolerant   |
| 223418_PM_x_at  | ANKRD13C | ankyrin repeat domain 13C                                                       | 0.00026 | 1.84  | Normal up vs Off IS Tolerant   |
| 205536_PM_at    | VAV2     | vav 2 guanine nucleotide exchange factor                                        | 0.00026 | -1.48 | Normal down vs Off IS Tolerant |
| 241486_PM_at    | ---      | ---                                                                             | 0.00026 | -1.26 | Normal down vs Off IS Tolerant |
| 221350_PM_at    | HOXC8    | homeobox C8                                                                     | 0.00026 | -1.26 | Normal down vs Off IS Tolerant |
| 217962_PM_at    | NOP10    | NOP10 ribonucleoprotein homolog (yeast)                                         | 0.00026 | -1.52 | Normal down vs Off IS Tolerant |
| 211524_PM_at    | NFKB2    | nuclear factor of kappa light polypeptide gene enhancer in B-cells 2 (p49/p100) | 0.00027 | -1.34 | Normal down vs Off IS Tolerant |

|                |           |                                                             |         |       |                                |
|----------------|-----------|-------------------------------------------------------------|---------|-------|--------------------------------|
| 217052_PM_x_at | ---       | ---                                                         | 0.00027 | -1.77 | Normal down vs Off IS Tolerant |
| 211034_PM_s_at | C12orf51  | chromosome 12 open reading frame 51                         | 0.00027 | 1.48  | Normal up vs Off IS Tolerant   |
| 242560_PM_at   | FANCD2    | Fanconi anemia, complementation group D2                    | 0.00027 | 1.68  | Normal up vs Off IS Tolerant   |
| 203830_PM_at   | C17orf75  | chromosome 17 open reading frame 75                         | 0.00027 | 1.48  | Normal up vs Off IS Tolerant   |
| 217547_PM_x_at | ZNF675    | zinc finger protein 675                                     | 0.00027 | 1.43  | Normal up vs Off IS Tolerant   |
| 229711_PM_s_at | MDM2      | Mdm2 p53 binding protein homolog (mouse)                    | 0.00027 | 1.36  | Normal up vs Off IS Tolerant   |
| 240252_PM_at   | ---       | ---                                                         | 0.00027 | -1.33 | Normal down vs Off IS Tolerant |
| 209229_PM_s_at | PPP6R1    | protein phosphatase 6, regulatory subunit 1                 | 0.00027 | 1.30  | Normal up vs Off IS Tolerant   |
| 214518_PM_at   | PDHA2     | pyruvate dehydrogenase (lipoamide) alpha 2                  | 0.00027 | -1.50 | Normal down vs Off IS Tolerant |
| 222759_PM_at   | SUV420H1  | suppressor of variegation 4-20 homolog 1 (Drosophila)       | 0.00027 | 1.26  | Normal up vs Off IS Tolerant   |
| 224673_PM_at   | LENG8     | leukocyte receptor cluster (LRC) member 8                   | 0.00027 | 1.58  | Normal up vs Off IS Tolerant   |
| 239295_PM_at   | SRSF12    | serine/arginine-rich splicing factor 12                     | 0.00027 | -1.37 | Normal down vs Off IS Tolerant |
| 223257_PM_at   | G2E3      | G2/M-phase specific E3 ubiquitin protein ligase             | 0.00027 | 1.58  | Normal up vs Off IS Tolerant   |
| 227458_PM_at   | CD274     | CD274 molecule                                              | 0.00027 | 1.69  | Normal up vs Off IS Tolerant   |
| 218900_PM_at   | CNNM4     | cyclin M4                                                   | 0.00027 | 1.34  | Normal up vs Off IS Tolerant   |
| 236254_PM_at   | VPS13B    | vacuolar protein sorting 13 homolog B (yeast)               | 0.00028 | -1.36 | Normal down vs Off IS Tolerant |
| 237840_PM_at   | LOC388948 | hypothetical LOC388948                                      | 0.00028 | -1.33 | Normal down vs Off IS Tolerant |
| 244379_PM_at   | ANO7L1    | anoctamin 7-like 1                                          | 0.00028 | -1.33 | Normal down vs Off IS Tolerant |
| 1559042_PM_at  | NDUFB6    | NADH dehydrogenase (ubiquinone) 1 beta subcomplex, 6, 17kDa | 0.00028 | 1.45  | Normal up vs Off IS Tolerant   |



|                 |                        |                                                                                         |         |       |                                |
|-----------------|------------------------|-----------------------------------------------------------------------------------------|---------|-------|--------------------------------|
| 1560897_PM_a_at | KRTAP10-11             | keratin associated protein 10-11                                                        | 0.00028 | -1.40 | Normal down vs Off IS Tolerant |
| 239969_PM_at    | ---                    | ---                                                                                     | 0.00028 | 1.55  | Normal up vs Off IS Tolerant   |
| 227334_PM_at    | USP54                  | ubiquitin specific peptidase 54                                                         | 0.00028 | 1.41  | Normal up vs Off IS Tolerant   |
| 211328_PM_x_at  | HFE                    | hemochromatosis                                                                         | 0.00028 | -1.35 | Normal down vs Off IS Tolerant |
| 227331_PM_at    | ZNF740                 | zinc finger protein 740                                                                 | 0.00028 | 1.56  | Normal up vs Off IS Tolerant   |
| 219605_PM_at    | ZNF3                   | zinc finger protein 3                                                                   | 0.00028 | -1.31 | Normal down vs Off IS Tolerant |
| 1560662_PM_s_at | WHAMML1 ///<br>WHAMML2 | WAS protein homolog associated with actin, golgi membranes and microtubules-like 1 (pse | 0.00028 | 2.01  | Normal up vs Off IS Tolerant   |
| 1552829_PM_at   | ---                    | ---                                                                                     | 0.00028 | -2.18 | Normal down vs Off IS Tolerant |
| 242706_PM_s_at  | MED23                  | mediator complex subunit 23                                                             | 0.00028 | 2.33  | Normal up vs Off IS Tolerant   |
| 228330_PM_at    | ZUFSP                  | zinc finger with UFM1-specific peptidase domain                                         | 0.00028 | 1.75  | Normal up vs Off IS Tolerant   |
| 224366_PM_s_at  | REPS1                  | RALBP1 associated Eps domain containing 1                                               | 0.00028 | 1.30  | Normal up vs Off IS Tolerant   |
| 210044_PM_s_at  | LYL1                   | lymphoblastic leukemia derived sequence 1                                               | 0.00028 | -1.45 | Normal down vs Off IS Tolerant |
| 243294_PM_at    | ZNF780B                | zinc finger protein 780B                                                                | 0.00028 | -1.34 | Normal down vs Off IS Tolerant |
| 203163_PM_at    | KATNB1                 | katanin p80 (WD repeat containing) subunit B 1                                          | 0.00028 | 1.49  | Normal up vs Off IS Tolerant   |
| 214789_PM_x_at  | SRSF8                  | serine/arginine-rich splicing factor 8                                                  | 0.00029 | 1.36  | Normal up vs Off IS Tolerant   |
| 213077_PM_at    | YTHDC2                 | YTH domain containing 2                                                                 | 0.00029 | 1.39  | Normal up vs Off IS Tolerant   |
| 211985_PM_s_at  | CALM1                  | calmodulin 1 (phosphorylase kinase, delta)                                              | 0.00029 | 1.59  | Normal up vs Off IS Tolerant   |
| 212220_PM_at    | PSME4                  | proteasome (prosome, macropain) activator subunit 4                                     | 0.00029 | -1.68 | Normal down vs Off IS Tolerant |
| 200908_PM_s_at  | RPLP2                  | ribosomal protein, large, P2                                                            | 0.00029 | -1.62 | Normal down vs Off IS Tolerant |

|                 |                         |                                                                                             |         |       |                                |
|-----------------|-------------------------|---------------------------------------------------------------------------------------------|---------|-------|--------------------------------|
| 235621_PM_at    | FAHD2A ///<br>LOC285014 | fumarylacetoacetate hydrolase domain<br>containing 2A /// hypothetical protein<br>LOC285014 | 0.00029 | 1.44  | Normal up vs Off IS Tolerant   |
| 212356_PM_at    | KHNYN                   | KH and NYN domain containing                                                                | 0.00029 | 1.34  | Normal up vs Off IS Tolerant   |
| 235502_PM_at    | PPP2CA                  | protein phosphatase 2, catalytic subunit,<br>alpha isozyme                                  | 0.00029 | 1.89  | Normal up vs Off IS Tolerant   |
| 236974_PM_at    | ---                     | ---                                                                                         | 0.00029 | 2.00  | Normal up vs Off IS Tolerant   |
| 200765_PM_x_at  | CTNNA1                  | catenin (cadherin-associated protein),<br>alpha 1, 102kDa                                   | 0.00029 | -1.41 | Normal down vs Off IS Tolerant |
| 210042_PM_s_at  | CTSZ                    | cathepsin Z                                                                                 | 0.00029 | -1.61 | Normal down vs Off IS Tolerant |
| 204425_PM_at    | ARHGAP4                 | Rho GTPase activating protein 4                                                             | 0.00029 | 1.49  | Normal up vs Off IS Tolerant   |
| 212034_PM_s_at  | EXOC7                   | exocyst complex component 7                                                                 | 0.00029 | 1.29  | Normal up vs Off IS Tolerant   |
| 200699_PM_at    | KDEL2                   | KDEL (Lys-Asp-Glu-Leu) endoplasmic<br>reticulum protein retention receptor 2                | 0.00029 | -1.63 | Normal down vs Off IS Tolerant |
| 211467_PM_s_at  | NFIB                    | nuclear factor I/B                                                                          | 0.00029 | -1.40 | Normal down vs Off IS Tolerant |
| 1561286_PM_a_at | DIP2A                   | DIP2 disco-interacting protein 2 homolog<br>A (Drosophila)                                  | 0.00029 | 1.47  | Normal up vs Off IS Tolerant   |
| 238623_PM_at    | ---                     | ---                                                                                         | 0.00029 | 1.88  | Normal up vs Off IS Tolerant   |
| 202984_PM_s_at  | BAG5                    | BCL2-associated athanogene 5                                                                | 0.00030 | 1.38  | Normal up vs Off IS Tolerant   |
| 224984_PM_at    | NFAT5                   | nuclear factor of activated T-cells 5,<br>tonicity-responsive                               | 0.00030 | 1.26  | Normal up vs Off IS Tolerant   |
| 203811_PM_s_at  | DNAJB4                  | DnaJ (Hsp40) homolog, subfamily B,<br>member 4                                              | 0.00030 | 1.28  | Normal up vs Off IS Tolerant   |
| 228697_PM_at    | HINT3                   | histidine triad nucleotide binding protein<br>3                                             | 0.00030 | 3.21  | Normal up vs Off IS Tolerant   |
| 1556160_PM_a_at | ---                     | ---                                                                                         | 0.00030 | 1.27  | Normal up vs Off IS Tolerant   |
| 209232_PM_s_at  | DCTN5                   | dynactin 5 (p25)                                                                            | 0.00030 | 1.39  | Normal up vs Off IS Tolerant   |
| 1553007_PM_a_at | ODZ1                    | odz, odd Oz/ten-m homolog<br>1(Drosophila)                                                  | 0.00030 | -1.22 | Normal down vs Off IS Tolerant |
| 210973_PM_s_at  | FGFR1                   | fibroblast growth factor receptor 1                                                         | 0.00030 | -1.49 | Normal down vs Off IS Tolerant |
| 218328_PM_at    | COQ4                    | coenzyme Q4 homolog (S. cerevisiae)                                                         | 0.00030 | 1.53  | Normal up vs Off IS Tolerant   |
| 206194_PM_at    | HOXC4                   | homeobox C4                                                                                 | 0.00030 | 1.59  | Normal up vs Off IS Tolerant   |

|                 |              |                                                      |         |       |                                |
|-----------------|--------------|------------------------------------------------------|---------|-------|--------------------------------|
| 225226_PM_at    | FAM40A       | family with sequence similarity 40, member A         | 0.00030 | 1.27  | Normal up vs Off IS Tolerant   |
| 32259_PM_at     | EZH1         | enhancer of zeste homolog 1 (Drosophila)             | 0.00030 | 1.37  | Normal up vs Off IS Tolerant   |
| 239783_PM_at    | ---          | ---                                                  | 0.00030 | 1.53  | Normal up vs Off IS Tolerant   |
| 225452_PM_at    | MED1         | mediator complex subunit 1                           | 0.00030 | -1.27 | Normal down vs Off IS Tolerant |
| 232256_PM_s_at  | LOC401321    | hypothetical LOC401321                               | 0.00030 | -1.62 | Normal down vs Off IS Tolerant |
| 227036_PM_at    | RASAL2       | RAS protein activator like 2                         | 0.00030 | -1.36 | Normal down vs Off IS Tolerant |
| 1554450_PM_s_at | MIER3        | mesoderm induction early response 1, family member 3 | 0.00030 | 1.78  | Normal up vs Off IS Tolerant   |
| 202998_PM_s_at  | LOXL2        | lysyl oxidase-like 2                                 | 0.00030 | 1.29  | Normal up vs Off IS Tolerant   |
| 206646_PM_at    | GLI1         | GLI family zinc finger 1                             | 0.00030 | -1.28 | Normal down vs Off IS Tolerant |
| 227852_PM_at    | RP9          | retinitis pigmentosa 9 (autosomal dominant)          | 0.00031 | 1.58  | Normal up vs Off IS Tolerant   |
| 211194_PM_s_at  | TP63         | tumor protein p63                                    | 0.00031 | -1.34 | Normal down vs Off IS Tolerant |
| 239846_PM_at    | LOC100506245 | hypothetical LOC100506245                            | 0.00031 | 1.83  | Normal up vs Off IS Tolerant   |
| 1554986_PM_a_at | SNX19        | sorting nexin 19                                     | 0.00031 | 1.45  | Normal up vs Off IS Tolerant   |
| 204481_PM_at    | BRPF1        | bromodomain and PHD finger containing, 1             | 0.00031 | 1.30  | Normal up vs Off IS Tolerant   |
| 200871_PM_s_at  | PSAP         | prosaposin                                           | 0.00031 | -1.26 | Normal down vs Off IS Tolerant |
| 228397_PM_at    | TUG1         | taurine upregulated 1 (non-protein coding)           | 0.00031 | 2.16  | Normal up vs Off IS Tolerant   |
| 225249_PM_at    | SPPL2B       | signal peptide peptidase-like 2B                     | 0.00031 | 1.43  | Normal up vs Off IS Tolerant   |
| 202396_PM_at    | TCERG1       | transcription elongation regulator 1                 | 0.00031 | 1.28  | Normal up vs Off IS Tolerant   |
| 216421_PM_at    | ---          | ---                                                  | 0.00031 | 1.36  | Normal up vs Off IS Tolerant   |
| 226797_PM_at    | MBTD1        | mbt domain containing 1                              | 0.00031 | 1.41  | Normal up vs Off IS Tolerant   |
| 241984_PM_at    | FOXN3        | forkhead box N3                                      | 0.00031 | -1.42 | Normal down vs Off IS Tolerant |

|                |              |                                                           |         |       |                                |
|----------------|--------------|-----------------------------------------------------------|---------|-------|--------------------------------|
| 219823_PM_at   | LIN28A       | lin-28 homolog A (C. elegans)                             | 0.00031 | -1.27 | Normal down vs Off IS Tolerant |
| 212675_PM_s_at | CEP68        | centrosomal protein 68kDa                                 | 0.00031 | 1.87  | Normal up vs Off IS Tolerant   |
| 214972_PM_at   | MGEA5        | Meningioma expressed antigen 5 (hyaluronidase)            | 0.00031 | 2.15  | Normal up vs Off IS Tolerant   |
| 225335_PM_at   | ZNF496       | zinc finger protein 496                                   | 0.00031 | 1.52  | Normal up vs Off IS Tolerant   |
| 205255_PM_x_at | TCF7         | transcription factor 7 (T-cell specific, HMG-box)         | 0.00031 | 1.78  | Normal up vs Off IS Tolerant   |
| 1556465_PM_at  | ---          | ---                                                       | 0.00031 | -1.30 | Normal down vs Off IS Tolerant |
| 211358_PM_s_at | CIZ1         | CDKN1A interacting zinc finger protein 1                  | 0.00031 | 1.37  | Normal up vs Off IS Tolerant   |
| 213243_PM_at   | VPS13B       | vacuolar protein sorting 13 homolog B (yeast)             | 0.00031 | 1.65  | Normal up vs Off IS Tolerant   |
| 235452_PM_at   | ---          | ---                                                       | 0.00031 | 1.56  | Normal up vs Off IS Tolerant   |
| 41577_PM_at    | PPP1R16B     | protein phosphatase 1, regulatory (inhibitor) subunit 16B | 0.00032 | 1.90  | Normal up vs Off IS Tolerant   |
| 218841_PM_at   | ASB8         | ankyrin repeat and SOCS box-containing 8                  | 0.00032 | 1.57  | Normal up vs Off IS Tolerant   |
| 225947_PM_at   | MYO19        | myosin XIX                                                | 0.00032 | 1.47  | Normal up vs Off IS Tolerant   |
| 44111_PM_at    | VPS33B       | vacuolar protein sorting 33 homolog B (yeast)             | 0.00032 | 1.35  | Normal up vs Off IS Tolerant   |
| 208658_PM_at   | PDIA4        | protein disulfide isomerase family A, member 4            | 0.00032 | -1.43 | Normal down vs Off IS Tolerant |
| 230526_PM_at   | LOC100131096 | hypothetical LOC100131096                                 | 0.00032 | 1.81  | Normal up vs Off IS Tolerant   |
| 237648_PM_x_at | ---          | ---                                                       | 0.00032 | -1.30 | Normal down vs Off IS Tolerant |
| 230768_PM_at   | ---          | ---                                                       | 0.00032 | 1.51  | Normal up vs Off IS Tolerant   |
| 225492_PM_at   | TMEM33       | transmembrane protein 33                                  | 0.00032 | -1.36 | Normal down vs Off IS Tolerant |
| 214128_PM_at   | DAGLA        | diacylglycerol lipase, alpha                              | 0.00032 | -1.31 | Normal down vs Off IS Tolerant |
| 232927_PM_at   | ---          | ---                                                       | 0.00032 | -1.36 | Normal down vs Off IS Tolerant |

|                 |                                  |                                                                      |         |       |                                |
|-----------------|----------------------------------|----------------------------------------------------------------------|---------|-------|--------------------------------|
| 224482_PM_s_at  | RAB11FIP4                        | RAB11 family interacting protein 4 (class II)                        | 0.00033 | 1.61  | Normal up vs Off IS Tolerant   |
| 214316_PM_x_at  | LOC100507328 ///<br>LOC100508591 | hypothetical LOC100507328 ///<br>hypothetical LOC100508591           | 0.00033 | -1.60 | Normal down vs Off IS Tolerant |
| 208923_PM_at    | CYFIP1                           | cytoplasmic FMR1 interacting protein 1                               | 0.00033 | -1.51 | Normal down vs Off IS Tolerant |
| 228847_PM_at    | EXOC3                            | exocyst complex component 3                                          | 0.00033 | 1.51  | Normal up vs Off IS Tolerant   |
| 240431_PM_at    | ---                              | ---                                                                  | 0.00033 | -1.56 | Normal down vs Off IS Tolerant |
| 236554_PM_x_at  | TMC8                             | transmembrane channel-like 8                                         | 0.00033 | 1.53  | Normal up vs Off IS Tolerant   |
| 228983_PM_at    | ---                              | ---                                                                  | 0.00033 | 1.64  | Normal up vs Off IS Tolerant   |
| 203723_PM_at    | ITPKB                            | inositol 1,4,5-trisphosphate 3-kinase B                              | 0.00033 | 1.70  | Normal up vs Off IS Tolerant   |
| 203884_PM_s_at  | RAB11FIP2                        | RAB11 family interacting protein 2 (class I)                         | 0.00033 | 1.47  | Normal up vs Off IS Tolerant   |
| 229679_PM_at    | C12orf76 ///<br>LOC100510175     | chromosome 12 open reading frame 76<br>/// hypothetical LOC100510175 | 0.00033 | 1.75  | Normal up vs Off IS Tolerant   |
| 238349_PM_at    | UBN2                             | ubiquitin 2                                                          | 0.00033 | -1.45 | Normal down vs Off IS Tolerant |
| 219178_PM_at    | QTRTD1                           | queuine tRNA-ribosyltransferase domain containing 1                  | 0.00033 | 1.38  | Normal up vs Off IS Tolerant   |
| 213036_PM_x_at  | ATP2A3                           | ATPase, Ca <sup>++</sup> transporting, ubiquitous                    | 0.00033 | 1.46  | Normal up vs Off IS Tolerant   |
| 212176_PM_at    | SFRS18                           | splicing factor, arginine/serine-rich 18                             | 0.00034 | 1.29  | Normal up vs Off IS Tolerant   |
| 214915_PM_at    | ZNF362                           | Zinc finger protein 362                                              | 0.00034 | 1.28  | Normal up vs Off IS Tolerant   |
| 208884_PM_s_at  | UBR5                             | ubiquitin protein ligase E3 component n-recogin 5                    | 0.00034 | 1.33  | Normal up vs Off IS Tolerant   |
| 239614_PM_x_at  | ---                              | ---                                                                  | 0.00034 | 1.67  | Normal up vs Off IS Tolerant   |
| 232565_PM_at    | ---                              | ---                                                                  | 0.00034 | 1.89  | Normal up vs Off IS Tolerant   |
| 1552634_PM_a_at | ZNF101                           | zinc finger protein 101                                              | 0.00034 | 2.08  | Normal up vs Off IS Tolerant   |
| 1554806_PM_a_at | FBXO8                            | F-box protein 8                                                      | 0.00034 | 1.95  | Normal up vs Off IS Tolerant   |
| 228680_PM_at    | KIF3A                            | kinesin family member 3A                                             | 0.00034 | 1.46  | Normal up vs Off IS Tolerant   |
| 209853_PM_s_at  | PSME3                            | proteasome (prosome, macropain) activator subunit 3 (PA28 gamma; Ki) | 0.00034 | -1.64 | Normal down vs Off IS Tolerant |
| 210757_PM_x_at  | DAB2                             | disabled homolog 2, mitogen-responsive phosphoprotein (Drosophila)   | 0.00034 | 2.00  | Normal up vs Off IS Tolerant   |

|                 |           |                                                             |         |       |                                |
|-----------------|-----------|-------------------------------------------------------------|---------|-------|--------------------------------|
| 1565581_PM_at   | ---       | ---                                                         | 0.00034 | -1.35 | Normal down vs Off IS Tolerant |
| 227645_PM_at    | PIK3R5    | phosphoinositide-3-kinase, regulatory subunit 5             | 0.00034 | 1.38  | Normal up vs Off IS Tolerant   |
| 201458_PM_s_at  | BUB3      | budding uninhibited by benzimidazoles 3 homolog (yeast)     | 0.00034 | 1.47  | Normal up vs Off IS Tolerant   |
| 200051_PM_at    | SART1     | squamous cell carcinoma antigen recognized by T cells       | 0.00035 | 1.47  | Normal up vs Off IS Tolerant   |
| 211963_PM_s_at  | ARPC5     | actin related protein 2/3 complex, subunit 5, 16kDa         | 0.00035 | -1.36 | Normal down vs Off IS Tolerant |
| 38447_PM_at     | ADRBK1    | adrenergic, beta, receptor kinase 1                         | 0.00035 | -1.46 | Normal down vs Off IS Tolerant |
| 224737_PM_x_at  | CCAR1     | cell division cycle and apoptosis regulator 1               | 0.00035 | 1.38  | Normal up vs Off IS Tolerant   |
| 1562682_PM_at   | RORA      | RAR-related orphan receptor A                               | 0.00035 | -1.44 | Normal down vs Off IS Tolerant |
| 241324_PM_at    | ---       | ---                                                         | 0.00035 | -1.45 | Normal down vs Off IS Tolerant |
| 1558088_PM_a_at | UBE2I     | ubiquitin-conjugating enzyme E2I (UBC9 homolog, yeast)      | 0.00035 | 2.14  | Normal up vs Off IS Tolerant   |
| 243995_PM_at    | PTAR1     | protein prenyltransferase alpha subunit repeat containing 1 | 0.00035 | -1.54 | Normal down vs Off IS Tolerant |
| 239701_PM_at    | ---       | ---                                                         | 0.00035 | -1.76 | Normal down vs Off IS Tolerant |
| 234386_PM_s_at  | ---       | ---                                                         | 0.00035 | -1.30 | Normal down vs Off IS Tolerant |
| 217603_PM_at    | ATP6V0A2  | ATPase, H+ transporting, lysosomal V0 subunit a2            | 0.00035 | 1.55  | Normal up vs Off IS Tolerant   |
| 235292_PM_at    | FLJ32255  | hypothetical LOC643977                                      | 0.00035 | 2.25  | Normal up vs Off IS Tolerant   |
| 221741_PM_s_at  | YTHDF1    | YTH domain family, member 1                                 | 0.00035 | 1.24  | Normal up vs Off IS Tolerant   |
| 216258_PM_s_at  | SERPINB13 | serpin peptidase inhibitor, clade B (ovalbumin), member 13  | 0.00035 | -1.23 | Normal down vs Off IS Tolerant |
| 235485_PM_at    | WDR44     | WD repeat domain 44                                         | 0.00036 | -1.33 | Normal down vs Off IS Tolerant |
| 241408_PM_at    | CRIPAK    | cysteine-rich PAK1 inhibitor                                | 0.00036 | 1.49  | Normal up vs Off IS Tolerant   |

|                 |           |                                                                                     |         |       |                                |
|-----------------|-----------|-------------------------------------------------------------------------------------|---------|-------|--------------------------------|
| 233284_PM_at    | ---       | ---                                                                                 | 0.00036 | 1.62  | Normal up vs Off IS Tolerant   |
| 226608_PM_at    | C16orf87  | chromosome 16 open reading frame 87                                                 | 0.00036 | 1.97  | Normal up vs Off IS Tolerant   |
| 227548_PM_at    | ORMDL1    | ORM1-like 1 ( <i>S. cerevisiae</i> )                                                | 0.00036 | 1.97  | Normal up vs Off IS Tolerant   |
| 228760_PM_at    | SRSF8     | serine/arginine-rich splicing factor 8                                              | 0.00036 | 1.55  | Normal up vs Off IS Tolerant   |
| 222543_PM_at    | DERL1     | Der1-like domain family, member 1                                                   | 0.00036 | 1.36  | Normal up vs Off IS Tolerant   |
| 213927_PM_at    | MAP3K9    | mitogen-activated protein kinase kinase kinase 9                                    | 0.00037 | 1.53  | Normal up vs Off IS Tolerant   |
| 234972_PM_at    | ARL16     | ADP-ribosylation factor-like 16                                                     | 0.00037 | 1.74  | Normal up vs Off IS Tolerant   |
| 229463_PM_at    | NTRK2     | neurotrophic tyrosine kinase, receptor, type 2                                      | 0.00037 | -1.66 | Normal down vs Off IS Tolerant |
| 1555996_PM_s_at | EIF4A2    | eukaryotic translation initiation factor 4A2                                        | 0.00037 | 2.50  | Normal up vs Off IS Tolerant   |
| 221541_PM_at    | CRISPLD2  | cysteine-rich secretory protein LCCL domain containing 2                            | 0.00037 | -2.09 | Normal down vs Off IS Tolerant |
| 213484_PM_at    | ---       | ---                                                                                 | 0.00037 | 1.36  | Normal up vs Off IS Tolerant   |
| 1556338_PM_at   | ---       | ---                                                                                 | 0.00037 | 2.03  | Normal up vs Off IS Tolerant   |
| 213934_PM_s_at  | ZNF23     | zinc finger protein 23 (KOX 16)                                                     | 0.00037 | 1.68  | Normal up vs Off IS Tolerant   |
| 242683_PM_at    | LOC400643 | hypothetical LOC400643                                                              | 0.00037 | -1.63 | Normal down vs Off IS Tolerant |
| 202349_PM_at    | TOR1A     | torsin family 1, member A (torsin A)                                                | 0.00037 | -1.54 | Normal down vs Off IS Tolerant |
| 211368_PM_s_at  | CASP1     | caspase 1, apoptosis-related cysteine peptidase (interleukin 1, beta, convertase)   | 0.00037 | -1.38 | Normal down vs Off IS Tolerant |
| 221559_PM_s_at  | MIS12     | MIS12, MIND kinetochore complex component, homolog ( <i>S. pombe</i> )              | 0.00037 | 1.44  | Normal up vs Off IS Tolerant   |
| 237106_PM_at    | SLC11A2   | Solute carrier family 11 (proton-coupled divalent metal ion transporters), member 2 | 0.00037 | 1.77  | Normal up vs Off IS Tolerant   |
| 201514_PM_s_at  | G3BP1     | GTPase activating protein (SH3 domain) binding protein 1                            | 0.00037 | -1.57 | Normal down vs Off IS Tolerant |
| 1561480_PM_a_at | ---       | ---                                                                                 | 0.00037 | -1.51 | Normal down vs Off IS Tolerant |
| 241730_PM_at    | MYNN      | myoneurin                                                                           | 0.00037 | 1.59  | Normal up vs Off IS Tolerant   |

|                 |           |                                                                  |         |       |                                |
|-----------------|-----------|------------------------------------------------------------------|---------|-------|--------------------------------|
| 208602_PM_x_at  | CD6       | CD6 molecule                                                     | 0.00038 | 1.54  | Normal up vs Off IS Tolerant   |
| 201675_PM_at    | AKAP1     | A kinase (PRKA) anchor protein 1                                 | 0.00038 | 1.41  | Normal up vs Off IS Tolerant   |
| 1563088_PM_a_at | LOC284837 | hypothetical LOC284837                                           | 0.00038 | -2.11 | Normal down vs Off IS Tolerant |
| 208105_PM_at    | GIPR      | gastric inhibitory polypeptide receptor                          | 0.00038 | -1.34 | Normal down vs Off IS Tolerant |
| 236999_PM_at    | ---       | ---                                                              | 0.00038 | 1.63  | Normal up vs Off IS Tolerant   |
| 209390_PM_at    | TSC1      | tuberous sclerosis 1                                             | 0.00038 | 1.36  | Normal up vs Off IS Tolerant   |
| 224511_PM_s_at  | TXNDC17   | thioredoxin domain containing 17                                 | 0.00038 | -1.51 | Normal down vs Off IS Tolerant |
| 218284_PM_at    | SMAD3     | SMAD family member 3                                             | 0.00038 | 1.39  | Normal up vs Off IS Tolerant   |
| 218476_PM_at    | POMT1     | protein-O-mannosyltransferase 1                                  | 0.00038 | 1.44  | Normal up vs Off IS Tolerant   |
| 241991_PM_at    | ---       | ---                                                              | 0.00038 | 1.77  | Normal up vs Off IS Tolerant   |
| 232000_PM_at    | TTC39B    | Tetratricopeptide repeat domain 39B                              | 0.00038 | 2.19  | Normal up vs Off IS Tolerant   |
| 222680_PM_s_at  | DTL       | denticleless homolog (Drosophila)                                | 0.00038 | -1.53 | Normal down vs Off IS Tolerant |
| 223466_PM_x_at  | COL4A3BP  | collagen, type IV, alpha 3 (Goodpasture antigen) binding protein | 0.00038 | -1.26 | Normal down vs Off IS Tolerant |
| 222108_PM_at    | AMIGO2    | adhesion molecule with Ig-like domain 2                          | 0.00038 | 1.74  | Normal up vs Off IS Tolerant   |
| 234147_PM_at    | LOC286059 | hypothetical LOC286059                                           | 0.00038 | -1.32 | Normal down vs Off IS Tolerant |
| 201413_PM_at    | HSD17B4   | hydroxysteroid (17-beta) dehydrogenase 4                         | 0.00038 | -1.57 | Normal down vs Off IS Tolerant |
| 39582_PM_at     | CYLD      | cylindromatosis (turban tumor syndrome)                          | 0.00038 | 1.45  | Normal up vs Off IS Tolerant   |
| 215367_PM_at    | KIAA1614  | KIAA1614                                                         | 0.00039 | -1.35 | Normal down vs Off IS Tolerant |
| 241153_PM_at    | ---       | ---                                                              | 0.00039 | -1.33 | Normal down vs Off IS Tolerant |
| 230427_PM_s_at  | BAG5      | BCL2-associated athanogene 5                                     | 0.00039 | 1.38  | Normal up vs Off IS Tolerant   |
| 221943_PM_x_at  | RPL38     | Ribosomal protein L38                                            | 0.00039 | -1.78 | Normal down vs Off IS Tolerant |
| 210346_PM_s_at  | CLK4      | CDC-like kinase 4                                                | 0.00039 | 1.30  | Normal up vs Off IS Tolerant   |
| 242429_PM_at    | ZNF567    | zinc finger protein 567                                          | 0.00039 | 1.83  | Normal up vs Off IS Tolerant   |



|                 |           |                                                                                        |         |       |                                |
|-----------------|-----------|----------------------------------------------------------------------------------------|---------|-------|--------------------------------|
| 207303_PM_at    | PDE1C     | phosphodiesterase 1C, calmodulin-dependent 70kDa                                       | 0.00039 | -1.64 | Normal down vs Off IS Tolerant |
| 235677_PM_at    | SRR       | Serine racemase                                                                        | 0.00039 | 1.59  | Normal up vs Off IS Tolerant   |
| 1554444_PM_s_at | C2orf18   | chromosome 2 open reading frame 18                                                     | 0.00039 | -1.53 | Normal down vs Off IS Tolerant |
| 211970_PM_x_at  | ACTG1     | actin, gamma 1                                                                         | 0.00040 | -1.14 | Normal down vs Off IS Tolerant |
| 1566324_PM_a_at | MAF       | v-maf musculoaponeurotic fibrosarcoma oncogene homolog (avian)                         | 0.00040 | 1.94  | Normal up vs Off IS Tolerant   |
| 216468_PM_s_at  | ZNF682    | zinc finger protein 682                                                                | 0.00040 | 1.43  | Normal up vs Off IS Tolerant   |
| 228033_PM_at    | E2F7      | E2F transcription factor 7                                                             | 0.00040 | -2.18 | Normal down vs Off IS Tolerant |
| 46142_PM_at     | LMF1      | lipase maturation factor 1                                                             | 0.00040 | 1.57  | Normal up vs Off IS Tolerant   |
| 1569885_PM_at   | ---       | ---                                                                                    | 0.00040 | -1.39 | Normal down vs Off IS Tolerant |
| 220250_PM_at    | ZNF286A   | zinc finger protein 286A                                                               | 0.00040 | -1.41 | Normal down vs Off IS Tolerant |
| 224657_PM_at    | ERRFI1    | ERBB receptor feedback inhibitor 1                                                     | 0.00040 | 1.78  | Normal up vs Off IS Tolerant   |
| 226143_PM_at    | RAI1      | retinoic acid induced 1                                                                | 0.00040 | 1.35  | Normal up vs Off IS Tolerant   |
| 213598_PM_at    | ---       | ---                                                                                    | 0.00040 | 1.65  | Normal up vs Off IS Tolerant   |
| 201274_PM_at    | PSMA5     | proteasome (prosome, macropain) subunit, alpha type, 5                                 | 0.00041 | -1.43 | Normal down vs Off IS Tolerant |
| 241783_PM_at    | ---       | ---                                                                                    | 0.00041 | -1.32 | Normal down vs Off IS Tolerant |
| 236760_PM_at    | AMMECR1   | Alport syndrome, mental retardation, midface hypoplasia and elliptocytosis chromosomal | 0.00041 | 1.56  | Normal up vs Off IS Tolerant   |
| 1557548_PM_at   | C10orf108 | chromosome 10 open reading frame 108                                                   | 0.00041 | -1.24 | Normal down vs Off IS Tolerant |
| 234263_PM_at    | ---       | ---                                                                                    | 0.00041 | -1.34 | Normal down vs Off IS Tolerant |
| 242876_PM_at    | AKT3      | V-akt murine thymoma viral oncogene homolog 3 (protein kinase B, gamma)                | 0.00041 | 1.78  | Normal up vs Off IS Tolerant   |

|                |           |                                                                                         |         |       |                                |
|----------------|-----------|-----------------------------------------------------------------------------------------|---------|-------|--------------------------------|
| 217891_PM_at   | C16orf58  | chromosome 16 open reading frame 58                                                     | 0.00041 | 1.40  | Normal up vs Off IS Tolerant   |
| 210125_PM_s_at | BANF1     | barrier to autointegration factor 1                                                     | 0.00041 | -1.46 | Normal down vs Off IS Tolerant |
| 38043_PM_at    | FAM3A     | family with sequence similarity 3, member A                                             | 0.00041 | 1.28  | Normal up vs Off IS Tolerant   |
| 210234_PM_at   | GRM4      | glutamate receptor, metabotropic 4                                                      | 0.00041 | -1.25 | Normal down vs Off IS Tolerant |
| 229838_PM_at   | NUCB2     | nucleobindin 2                                                                          | 0.00041 | 1.76  | Normal up vs Off IS Tolerant   |
| 221945_PM_at   | FBXO41    | F-box protein 41                                                                        | 0.00041 | 1.29  | Normal up vs Off IS Tolerant   |
| 1555076_PM_at  | ARHGAP25  | Rho GTPase activating protein 25                                                        | 0.00042 | -1.33 | Normal down vs Off IS Tolerant |
| 219147_PM_s_at | C9orf95   | chromosome 9 open reading frame 95                                                      | 0.00042 | 1.79  | Normal up vs Off IS Tolerant   |
| 212274_PM_at   | LPIN1     | lipin 1                                                                                 | 0.00042 | 1.57  | Normal up vs Off IS Tolerant   |
| 203300_PM_x_at | AP1S2     | adaptor-related protein complex 1, sigma 2 subunit                                      | 0.00042 | -1.43 | Normal down vs Off IS Tolerant |
| 220189_PM_s_at | MGAT4B    | mannosyl (alpha-1,3-)-glycoprotein beta-1,4-N-acetylglucosaminyltransferase, isozyme B  | 0.00042 | 1.63  | Normal up vs Off IS Tolerant   |
| 222655_PM_s_at | IMPAD1    | inositol monophosphatase domain containing 1                                            | 0.00042 | -1.28 | Normal down vs Off IS Tolerant |
| 227722_PM_at   | RPS23     | ribosomal protein S23                                                                   | 0.00042 | 2.29  | Normal up vs Off IS Tolerant   |
| 214918_PM_at   | HNRNPM    | heterogeneous nuclear ribonucleoprotein M                                               | 0.00042 | 2.18  | Normal up vs Off IS Tolerant   |
| 233049_PM_x_at | STUB1     | STIP1 homology and U-box containing protein 1, E3 ubiquitin protein ligase              | 0.00043 | 1.20  | Normal up vs Off IS Tolerant   |
| 236832_PM_at   | LOC221442 | adenylate cyclase 10 pseudogene                                                         | 0.00043 | 1.70  | Normal up vs Off IS Tolerant   |
| 201040_PM_at   | GNAI2     | guanine nucleotide binding protein (G protein), alpha inhibiting activity polypeptide 2 | 0.00043 | -1.42 | Normal down vs Off IS Tolerant |
| 226704_PM_at   | UBE2J2    | ubiquitin-conjugating enzyme E2, J2 (UBC6 homolog, yeast)                               | 0.00043 | -1.42 | Normal down vs Off IS Tolerant |

|                |                                                                                                                          |                                                                                               |         |       |                                |
|----------------|--------------------------------------------------------------------------------------------------------------------------|-----------------------------------------------------------------------------------------------|---------|-------|--------------------------------|
| 229447_PM_x_at | NBPF1 /// NBPF10<br>/// NBPF11 ///<br>NBPF12 /// NBPF14<br>/// NBPF15 ///<br>NBPF16 /// NBPF24<br>/// NBPF8 ///<br>NBPF9 | neuroblastoma breakpoint family,<br>member 1 /// neuroblastoma breakpoint<br>family, member 1 | 0.00043 | 1.21  | Normal up vs Off IS Tolerant   |
| 227754_PM_at   | ---                                                                                                                      | ---                                                                                           | 0.00043 | 1.51  | Normal up vs Off IS Tolerant   |
| 1565002_PM_at  | ---                                                                                                                      | ---                                                                                           | 0.00043 | -1.36 | Normal down vs Off IS Tolerant |
| 211698_PM_at   | EID1                                                                                                                     | EP300 interacting inhibitor of<br>differentiation 1                                           | 0.00043 | 1.44  | Normal up vs Off IS Tolerant   |
| 210540_PM_s_at | B4GALT4                                                                                                                  | UDP-Gal:betaGlcNAc beta 1,4-<br>galactosyltransferase, polypeptide 4                          | 0.00043 | 1.55  | Normal up vs Off IS Tolerant   |
| 226045_PM_at   | FRS2                                                                                                                     | fibroblast growth factor receptor<br>substrate 2                                              | 0.00043 | 1.73  | Normal up vs Off IS Tolerant   |
| 228451_PM_at   | TSSK3                                                                                                                    | Testis-specific serine kinase 3                                                               | 0.00043 | 1.33  | Normal up vs Off IS Tolerant   |
| 207353_PM_s_at | HMX1                                                                                                                     | H6 family homeobox 1                                                                          | 0.00043 | -1.52 | Normal down vs Off IS Tolerant |
| 220215_PM_at   | ZNF669                                                                                                                   | zinc finger protein 669                                                                       | 0.00043 | 1.54  | Normal up vs Off IS Tolerant   |
| 233108_PM_at   | ---                                                                                                                      | ---                                                                                           | 0.00043 | -1.30 | Normal down vs Off IS Tolerant |
| 209901_PM_x_at | AIF1                                                                                                                     | allograft inflammatory factor 1                                                               | 0.00043 | -1.45 | Normal down vs Off IS Tolerant |
| 227134_PM_at   | SYTL1                                                                                                                    | synaptotagmin-like 1                                                                          | 0.00043 | 1.57  | Normal up vs Off IS Tolerant   |
| 204125_PM_at   | NDUFAF1                                                                                                                  | NADH dehydrogenase (ubiquinone) 1<br>alpha subcomplex, assembly factor 1                      | 0.00044 | -1.93 | Normal down vs Off IS Tolerant |
| 213593_PM_s_at | TRA2A                                                                                                                    | transformer 2 alpha homolog<br>(Drosophila)                                                   | 0.00044 | 1.62  | Normal up vs Off IS Tolerant   |
| 37802_PM_r_at  | FAM63B                                                                                                                   | family with sequence similarity 63,<br>member B                                               | 0.00044 | 1.24  | Normal up vs Off IS Tolerant   |
| 222041_PM_at   | DPH1 /// OVCA2                                                                                                           | DPH1 homolog ( <i>S. cerevisiae</i> ) /// ovarian<br>tumor suppressor candidate 2             | 0.00044 | 1.43  | Normal up vs Off IS Tolerant   |
| 232205_PM_at   | ---                                                                                                                      | ---                                                                                           | 0.00044 | 1.44  | Normal up vs Off IS Tolerant   |

|                |                                                                             |                                                                                        |         |       |                                |
|----------------|-----------------------------------------------------------------------------|----------------------------------------------------------------------------------------|---------|-------|--------------------------------|
| 233255_PM_s_at | BIVM                                                                        | basic, immunoglobulin-like variable motif containing                                   | 0.00044 | 1.73  | Normal up vs Off IS Tolerant   |
| 222965_PM_at   | PRO2214                                                                     | hypothetical protein PRO2214                                                           | 0.00044 | -1.61 | Normal down vs Off IS Tolerant |
| 214194_PM_at   | DIS3                                                                        | DIS3 mitotic control homolog (S. cerevisiae)                                           | 0.00044 | 1.56  | Normal up vs Off IS Tolerant   |
| 209889_PM_at   | SEC31B                                                                      | SEC31 homolog B (S. cerevisiae)                                                        | 0.00044 | 1.48  | Normal up vs Off IS Tolerant   |
| 1561148_PM_at  | ---                                                                         | ---                                                                                    | 0.00044 | -1.39 | Normal down vs Off IS Tolerant |
| 221810_PM_at   | RAB15                                                                       | RAB15, member RAS oncogene family                                                      | 0.00044 | 1.58  | Normal up vs Off IS Tolerant   |
| 207713_PM_s_at | RBCK1                                                                       | RanBP-type and C3HC4-type zinc finger containing 1                                     | 0.00044 | 1.39  | Normal up vs Off IS Tolerant   |
| 225172_PM_at   | CRAMP1L                                                                     | Crm, cramped-like (Drosophila)                                                         | 0.00044 | 1.51  | Normal up vs Off IS Tolerant   |
| 222182_PM_s_at | CNOT2                                                                       | CCR4-NOT transcription complex, subunit 2                                              | 0.00044 | 1.22  | Normal up vs Off IS Tolerant   |
| 217353_PM_at   | HNRNPA1 ///<br>HNRNPA1L2 ///<br>HNRNPA1P10 ///<br>HNRPA1P5 ///<br>LOC642817 | heterogeneous nuclear ribonucleoprotein A1 /// heterogeneous nuclear ribonucleoprotein | 0.00044 | 1.25  | Normal up vs Off IS Tolerant   |
| 226682_PM_at   | RORA                                                                        | RAR-related orphan receptor A                                                          | 0.00044 | 1.88  | Normal up vs Off IS Tolerant   |
| 212096_PM_s_at | MTUS1                                                                       | microtubule associated tumor suppressor 1                                              | 0.00044 | 2.00  | Normal up vs Off IS Tolerant   |
| 240357_PM_at   | ---                                                                         | ---                                                                                    | 0.00045 | -1.33 | Normal down vs Off IS Tolerant |
| 215941_PM_at   | ---                                                                         | ---                                                                                    | 0.00045 | -1.28 | Normal down vs Off IS Tolerant |
| 213612_PM_x_at | NBPF12                                                                      | neuroblastoma breakpoint family, member 12                                             | 0.00045 | 1.19  | Normal up vs Off IS Tolerant   |
| 239725_PM_at   | PGAP1                                                                       | post-GPI attachment to proteins 1                                                      | 0.00045 | 1.53  | Normal up vs Off IS Tolerant   |
| 232650_PM_at   | C12orf65                                                                    | chromosome 12 open reading frame 65                                                    | 0.00045 | 1.43  | Normal up vs Off IS Tolerant   |
| 206743_PM_s_at | ASGR1                                                                       | asialoglycoprotein receptor 1                                                          | 0.00045 | -1.85 | Normal down vs Off IS Tolerant |

|                 |            |                                                          |         |       |                                |
|-----------------|------------|----------------------------------------------------------|---------|-------|--------------------------------|
| 230791_PM_at    | ---        | ---                                                      | 0.00045 | -1.48 | Normal down vs Off IS Tolerant |
| 205212_PM_s_at  | ACAP1      | ArfGAP with coiled-coil, ankyrin repeat and PH domains 1 | 0.00045 | 1.47  | Normal up vs Off IS Tolerant   |
| 211199_PM_s_at  | ICOSLG     | inducible T-cell co-stimulator ligand                    | 0.00045 | 1.75  | Normal up vs Off IS Tolerant   |
| 1554503_PM_a_at | OSCAR      | osteoclast associated, immunoglobulin-like receptor      | 0.00045 | -1.85 | Normal down vs Off IS Tolerant |
| 1557837_PM_a_at | ELMOD2     | ELMO/CED-12 domain containing 2                          | 0.00045 | -1.47 | Normal down vs Off IS Tolerant |
| 225655_PM_at    | UHRF1      | ubiquitin-like with PHD and ring finger domains 1        | 0.00045 | -1.75 | Normal down vs Off IS Tolerant |
| 229535_PM_at    | PTPMT1     | protein tyrosine phosphatase, mitochondrial 1            | 0.00046 | 1.60  | Normal up vs Off IS Tolerant   |
| 1570048_PM_at   | DNAJC24    | DnaJ (Hsp40) homolog, subfamily C, member 24             | 0.00046 | -1.28 | Normal down vs Off IS Tolerant |
| 219451_PM_at    | MSRB2      | methionine sulfoxide reductase B2                        | 0.00046 | -1.69 | Normal down vs Off IS Tolerant |
| 229907_PM_at    | ---        | ---                                                      | 0.00046 | 1.92  | Normal up vs Off IS Tolerant   |
| 1563130_PM_a_at | ---        | ---                                                      | 0.00046 | 1.78  | Normal up vs Off IS Tolerant   |
| 235901_PM_at    | ---        | ---                                                      | 0.00046 | 1.56  | Normal up vs Off IS Tolerant   |
| 226168_PM_at    | ZFAND2B    | zinc finger, AN1-type domain 2B                          | 0.00046 | 1.29  | Normal up vs Off IS Tolerant   |
| 1562058_PM_at   | ---        | ---                                                      | 0.00046 | -1.22 | Normal down vs Off IS Tolerant |
| 209042_PM_s_at  | UBE2G2     | ubiquitin-conjugating enzyme E2G 2 (UBC7 homolog, yeast) | 0.00046 | 1.27  | Normal up vs Off IS Tolerant   |
| 205728_PM_at    | ODZ1       | odz, odd Oz/ten-m homolog 1(Drosophila)                  | 0.00046 | 1.65  | Normal up vs Off IS Tolerant   |
| 232130_PM_at    | ---        | ---                                                      | 0.00046 | 1.86  | Normal up vs Off IS Tolerant   |
| 243310_PM_at    | ---        | ---                                                      | 0.00046 | 1.71  | Normal up vs Off IS Tolerant   |
| 204800_PM_s_at  | DHRS12     | dehydrogenase/reductase (SDR family) member 12           | 0.00046 | 1.63  | Normal up vs Off IS Tolerant   |
| 1558425_PM_x_at | NCRNA00265 | non-protein coding RNA 265                               | 0.00046 | -1.35 | Normal down vs Off IS Tolerant |
| 228122_PM_at    | CCDC66     | coiled-coil domain containing 66                         | 0.00047 | 1.87  | Normal up vs Off IS Tolerant   |

|                |            |                                                                                       |         |       |                                |
|----------------|------------|---------------------------------------------------------------------------------------|---------|-------|--------------------------------|
| 218860_PM_at   | NOC4L      | nucleolar complex associated 4 homolog (S. cerevisiae)                                | 0.00047 | 1.59  | Normal up vs Off IS Tolerant   |
| 203118_PM_at   | PCSK7      | proprotein convertase subtilisin/kexin type 7                                         | 0.00047 | 1.40  | Normal up vs Off IS Tolerant   |
| 203281_PM_s_at | UBA7       | ubiquitin-like modifier activating enzyme 7                                           | 0.00047 | 1.40  | Normal up vs Off IS Tolerant   |
| 244778_PM_x_at | ---        | ---                                                                                   | 0.00047 | 1.61  | Normal up vs Off IS Tolerant   |
| 203580_PM_s_at | SLC7A6     | solute carrier family 7 (cationic amino acid transporter, y+ system), member 6        | 0.00047 | 1.62  | Normal up vs Off IS Tolerant   |
| 226424_PM_at   | CAPS       | calcyphosine                                                                          | 0.00047 | 1.43  | Normal up vs Off IS Tolerant   |
| 200899_PM_s_at | MGEA5      | meningioma expressed antigen 5 (hyaluronidase)                                        | 0.00047 | 1.37  | Normal up vs Off IS Tolerant   |
| 218268_PM_at   | TBC1D15    | TBC1 domain family, member 15                                                         | 0.00047 | 1.52  | Normal up vs Off IS Tolerant   |
| 227338_PM_at   | LOC440983  | Hypothetical gene supported by BC066916                                               | 0.00047 | -1.41 | Normal down vs Off IS Tolerant |
| 1569680_PM_at  | ---        | ---                                                                                   | 0.00047 | -1.74 | Normal down vs Off IS Tolerant |
| 202268_PM_s_at | NAE1       | NEDD8 activating enzyme E1 subunit 1                                                  | 0.00048 | 1.44  | Normal up vs Off IS Tolerant   |
| 224312_PM_x_at | CPSF3L     | cleavage and polyadenylation specific factor 3-like                                   | 0.00048 | 1.39  | Normal up vs Off IS Tolerant   |
| 211160_PM_x_at | ACTN1      | actinin, alpha 1                                                                      | 0.00048 | 1.45  | Normal up vs Off IS Tolerant   |
| 219233_PM_s_at | GSDMB      | gasdermin B                                                                           | 0.00048 | 1.91  | Normal up vs Off IS Tolerant   |
| 239063_PM_at   | ---        | ---                                                                                   | 0.00048 | 1.40  | Normal up vs Off IS Tolerant   |
| 240339_PM_at   | ---        | ---                                                                                   | 0.00048 | 1.79  | Normal up vs Off IS Tolerant   |
| 230209_PM_at   | ZXDC       | ZXD family zinc finger C                                                              | 0.00048 | 1.56  | Normal up vs Off IS Tolerant   |
| 241566_PM_at   | ---        | ---                                                                                   | 0.00048 | -1.40 | Normal down vs Off IS Tolerant |
| 232910_PM_at   | NCRNA00081 | non-protein coding RNA 81                                                             | 0.00048 | 1.50  | Normal up vs Off IS Tolerant   |
| 205518_PM_s_at | CMAH       | cytidine monophosphate-N-acetylneuraminic acid hydroxylase (CMP-N-acetylneuramate mon | 0.00048 | 1.68  | Normal up vs Off IS Tolerant   |
| 1558987_PM_at  | ---        | ---                                                                                   | 0.00048 | 1.32  | Normal up vs Off IS Tolerant   |
| 228165_PM_at   | C12orf53   | chromosome 12 open reading frame 53                                                   | 0.00048 | -1.32 | Normal down vs Off IS Tolerant |

|                 |              |                                                          |         |       |                                |
|-----------------|--------------|----------------------------------------------------------|---------|-------|--------------------------------|
| 234975_PM_at    | GSPT1        | G1 to S phase transition 1                               | 0.00049 | 1.75  | Normal up vs Off IS Tolerant   |
| 1552791_PM_a_at | TRDN         | triadin                                                  | 0.00049 | -1.53 | Normal down vs Off IS Tolerant |
| 1561761_PM_x_at | LOC645513    | Hypothetical LOC645513                                   | 0.00049 | 1.51  | Normal up vs Off IS Tolerant   |
| 203154_PM_s_at  | PAK4         | p21 protein (Cdc42/Rac)-activated kinase 4               | 0.00049 | 1.29  | Normal up vs Off IS Tolerant   |
| 222214_PM_at    | ---          | ---                                                      | 0.00049 | 1.56  | Normal up vs Off IS Tolerant   |
| 204613_PM_at    | PLCG2        | phospholipase C, gamma 2 (phosphatidylinositol-specific) | 0.00049 | -1.40 | Normal down vs Off IS Tolerant |
| 239346_PM_at    | ---          | ---                                                      | 0.00049 | 1.86  | Normal up vs Off IS Tolerant   |
| 213295_PM_at    | CYLD         | cylindromatosis (turban tumor syndrome)                  | 0.00049 | 1.40  | Normal up vs Off IS Tolerant   |
| 233433_PM_at    | ---          | ---                                                      | 0.00049 | -1.41 | Normal down vs Off IS Tolerant |
| 203100_PM_s_at  | CDYL         | chromodomain protein, Y-like                             | 0.00049 | 1.51  | Normal up vs Off IS Tolerant   |
| 218116_PM_at    | C9orf78      | chromosome 9 open reading frame 78                       | 0.00049 | 1.55  | Normal up vs Off IS Tolerant   |
| 214834_PM_at    | PAR5         | Prader-Willi/Angelman syndrome-5                         | 0.00050 | 1.36  | Normal up vs Off IS Tolerant   |
| 213095_PM_x_at  | AIF1         | allograft inflammatory factor 1                          | 0.00050 | -1.46 | Normal down vs Off IS Tolerant |
| 202847_PM_at    | PCK2         | phosphoenolpyruvate carboxykinase 2 (mitochondrial)      | 0.00050 | -1.53 | Normal down vs Off IS Tolerant |
| 214295_PM_at    | KIAA0485     | hypothetical LOC57235                                    | 0.00050 | -1.75 | Normal down vs Off IS Tolerant |
| 217580_PM_x_at  | ---          | ---                                                      | 0.00050 | -1.80 | Normal down vs Off IS Tolerant |
| 206485_PM_at    | CD5          | CD5 molecule                                             | 0.00050 | 1.69  | Normal up vs Off IS Tolerant   |
| 224597_PM_at    | LOC647979    | hypothetical LOC647979                                   | 0.00050 | 1.21  | Normal up vs Off IS Tolerant   |
| 202862_PM_at    | FAH          | fumarylacetoacetate hydrolase (fumarylacetoacetase)      | 0.00050 | 1.55  | Normal up vs Off IS Tolerant   |
| 236657_PM_at    | LOC100288911 | hypothetical LOC100288911                                | 0.00050 | -1.47 | Normal down vs Off IS Tolerant |
| 233761_PM_at    | ---          | ---                                                      | 0.00051 | -1.31 | Normal down vs Off IS Tolerant |
| 1555847_PM_a_at | LOC284454    | hypothetical LOC284454                                   | 0.00051 | -2.04 | Normal down vs Off IS Tolerant |

|                 |              |                                                                                            |         |       |                                |
|-----------------|--------------|--------------------------------------------------------------------------------------------|---------|-------|--------------------------------|
| 217584_PM_at    | NPC1         | Niemann-Pick disease, type C1                                                              | 0.00051 | 1.59  | Normal up vs Off IS Tolerant   |
| 215468_PM_at    | LOC647070    | hypothetical LOC647070                                                                     | 0.00051 | -1.32 | Normal down vs Off IS Tolerant |
| 1557388_PM_at   | RTTN         | rotatin                                                                                    | 0.00051 | -1.69 | Normal down vs Off IS Tolerant |
| 1557491_PM_at   | LOC100240728 | hypothetical LOC100240728                                                                  | 0.00051 | -1.45 | Normal down vs Off IS Tolerant |
| 242352_PM_at    | NIPBL        | Nipped-B homolog (Drosophila)                                                              | 0.00051 | -1.40 | Normal down vs Off IS Tolerant |
| 240788_PM_at    | ---          | ---                                                                                        | 0.00051 | -1.44 | Normal down vs Off IS Tolerant |
| 225909_PM_at    | LOC728743    | similar to GLI-Kruppel family member<br>HKR1                                               | 0.00051 | 1.75  | Normal up vs Off IS Tolerant   |
| 236730_PM_at    | GIPC3        | GIPC PDZ domain containing family,<br>member 3                                             | 0.00052 | -1.37 | Normal down vs Off IS Tolerant |
| 209570_PM_s_at  | D4S234E      | DNA segment on chromosome 4 (unique)<br>234 expressed sequence                             | 0.00052 | 2.17  | Normal up vs Off IS Tolerant   |
| 225133_PM_at    | KLF3         | Kruppel-like factor 3 (basic)                                                              | 0.00052 | 1.40  | Normal up vs Off IS Tolerant   |
| 1556817_PM_a_at | ---          | ---                                                                                        | 0.00052 | -2.16 | Normal down vs Off IS Tolerant |
| 238475_PM_at    | ALG10B       | asparagine-linked glycosylation 10, alpha-<br>1,2-glucosyltransferase homolog B<br>(yeast) | 0.00052 | 1.57  | Normal up vs Off IS Tolerant   |
| 1555412_PM_at   | FBXL21       | F-box and leucine-rich repeat protein 21<br>(gene/pseudogene)                              | 0.00052 | -2.02 | Normal down vs Off IS Tolerant |
| 220617_PM_s_at  | ZNF532       | zinc finger protein 532                                                                    | 0.00052 | -1.47 | Normal down vs Off IS Tolerant |
| 229949_PM_at    | LOC100507625 | hypothetical LOC100507625                                                                  | 0.00052 | 1.34  | Normal up vs Off IS Tolerant   |
| 232478_PM_at    | ---          | ---                                                                                        | 0.00052 | -1.71 | Normal down vs Off IS Tolerant |
| 235556_PM_at    | C5orf41      | chromosome 5 open reading frame 41                                                         | 0.00052 | 1.46  | Normal up vs Off IS Tolerant   |
| 35179_PM_at     | B3GAT3       | beta-1,3-glucuronyltransferase 3<br>(glucuronosyltransferase I)                            | 0.00052 | 1.33  | Normal up vs Off IS Tolerant   |
| 1555990_PM_at   | C22orf42     | chromosome 22 open reading frame 42                                                        | 0.00052 | -2.11 | Normal down vs Off IS Tolerant |



|                |           |                                                                    |         |       |                                |
|----------------|-----------|--------------------------------------------------------------------|---------|-------|--------------------------------|
| 1564274_PM_at  | C9orf47   | chromosome 9 open reading frame 47                                 | 0.00052 | -1.64 | Normal down vs Off IS Tolerant |
| 244486_PM_at   | ---       | ---                                                                | 0.00053 | 1.86  | Normal up vs Off IS Tolerant   |
| 211094_PM_s_at | NF1       | neurofibromin 1                                                    | 0.00053 | -1.61 | Normal down vs Off IS Tolerant |
| 230965_PM_at   | USP2      | ubiquitin specific peptidase 2                                     | 0.00053 | -1.26 | Normal down vs Off IS Tolerant |
| 1562596_PM_at  | ---       | ---                                                                | 0.00053 | -1.28 | Normal down vs Off IS Tolerant |
| 236134_PM_at   | DCAF7     | DDB1 and CUL4 associated factor 7                                  | 0.00053 | 1.61  | Normal up vs Off IS Tolerant   |
| 212000_PM_at   | SUGP2     | SURP and G patch domain containing 2                               | 0.00053 | 1.82  | Normal up vs Off IS Tolerant   |
| 218343_PM_s_at | GTF3C3    | general transcription factor IIIC, polypeptide 3, 102kDa           | 0.00053 | 1.33  | Normal up vs Off IS Tolerant   |
| 243601_PM_at   | LOC285957 | hypothetical protein LOC285957                                     | 0.00053 | 1.66  | Normal up vs Off IS Tolerant   |
| 202501_PM_at   | MAPRE2    | microtubule-associated protein, RP/EB family, member 2             | 0.00053 | 1.29  | Normal up vs Off IS Tolerant   |
| 243638_PM_at   | ---       | ---                                                                | 0.00053 | -1.46 | Normal down vs Off IS Tolerant |
| 219171_PM_s_at | ZNF236    | zinc finger protein 236                                            | 0.00053 | 1.42  | Normal up vs Off IS Tolerant   |
| 226068_PM_at   | SYK       | spleen tyrosine kinase                                             | 0.00053 | -1.37 | Normal down vs Off IS Tolerant |
| 222115_PM_x_at | GLYR1     | glyoxylate reductase 1 homolog (Arabidopsis)                       | 0.00053 | 1.28  | Normal up vs Off IS Tolerant   |
| 1560354_PM_at  | CCDC127   | Coiled-coil domain containing 127                                  | 0.00053 | 1.31  | Normal up vs Off IS Tolerant   |
| 1563105_PM_at  | ---       | ---                                                                | 0.00053 | -1.34 | Normal down vs Off IS Tolerant |
| 208574_PM_at   | SOX14     | SRY (sex determining region Y)-box 14                              | 0.00053 | -1.34 | Normal down vs Off IS Tolerant |
| 213214_PM_x_at | ACTG1     | actin, gamma 1                                                     | 0.00053 | -1.12 | Normal down vs Off IS Tolerant |
| 226567_PM_at   | USP14     | ubiquitin specific peptidase 14 (tRNA-guanine transglycosylase)    | 0.00053 | 1.32  | Normal up vs Off IS Tolerant   |
| 205134_PM_s_at | NUFIP1    | nuclear fragile X mental retardation protein interacting protein 1 | 0.00054 | 1.63  | Normal up vs Off IS Tolerant   |
| 240338_PM_at   | ---       | ---                                                                | 0.00054 | 1.64  | Normal up vs Off IS Tolerant   |

|                |                                                                           |                                                                                               |         |       |                                |
|----------------|---------------------------------------------------------------------------|-----------------------------------------------------------------------------------------------|---------|-------|--------------------------------|
| 206618_PM_at   | IL18R1                                                                    | interleukin 18 receptor 1                                                                     | 0.00054 | 1.98  | Normal up vs Off IS Tolerant   |
| 234419_PM_x_at | IGHA1 /// IGHG1<br>/// IGHG3 /// IGHM<br>/// IGHV4-31 ///<br>LOC100293211 | immunoglobulin heavy constant alpha 1<br>/// immunoglobulin heavy constant<br>gamma 1 (G1m ma | 0.00054 | -1.37 | Normal down vs Off IS Tolerant |
| 224869_PM_s_at | MRPS25                                                                    | mitochondrial ribosomal protein S25                                                           | 0.00054 | -1.48 | Normal down vs Off IS Tolerant |
| 1562989_PM_at  | ---                                                                       | ---                                                                                           | 0.00054 | -1.31 | Normal down vs Off IS Tolerant |
| 209379_PM_s_at | FAM190B                                                                   | family with sequence similarity 190,<br>member B                                              | 0.00054 | 1.43  | Normal up vs Off IS Tolerant   |
| 222382_PM_x_at | NUP205                                                                    | nucleoporin 205kDa                                                                            | 0.00054 | 1.35  | Normal up vs Off IS Tolerant   |
| 219215_PM_s_at | SLC39A4                                                                   | solute carrier family 39 (zinc<br>transporter), member 4                                      | 0.00055 | 1.73  | Normal up vs Off IS Tolerant   |
| 202920_PM_at   | ANK2                                                                      | ankyrin 2, neuronal                                                                           | 0.00055 | -1.41 | Normal down vs Off IS Tolerant |
| 220121_PM_at   | LINS                                                                      | lines homolog (Drosophila)                                                                    | 0.00055 | 1.76  | Normal up vs Off IS Tolerant   |
| 223136_PM_at   | AIG1                                                                      | androgen-induced 1                                                                            | 0.00055 | 1.92  | Normal up vs Off IS Tolerant   |
| 222981_PM_s_at | RAB10                                                                     | RAB10, member RAS oncogene family                                                             | 0.00055 | -1.91 | Normal down vs Off IS Tolerant |
| 244382_PM_at   | ---                                                                       | ---                                                                                           | 0.00055 | 2.03  | Normal up vs Off IS Tolerant   |
| 235905_PM_at   | ZNF704                                                                    | zinc finger protein 704                                                                       | 0.00055 | -1.35 | Normal down vs Off IS Tolerant |
| 1560566_PM_at  | PCDH20                                                                    | Protocadherin 20                                                                              | 0.00055 | -1.29 | Normal down vs Off IS Tolerant |
| 231845_PM_at   | AARS2                                                                     | alanyl-tRNA synthetase 2, mitochondrial<br>(putative)                                         | 0.00055 | 1.45  | Normal up vs Off IS Tolerant   |
| 203923_PM_s_at | CYBB                                                                      | cytochrome b-245, beta polypeptide                                                            | 0.00055 | -1.33 | Normal down vs Off IS Tolerant |
| 242799_PM_at   | ---                                                                       | ---                                                                                           | 0.00055 | -1.32 | Normal down vs Off IS Tolerant |
| 233803_PM_s_at | MYBBP1A                                                                   | MYB binding protein (P160) 1a                                                                 | 0.00055 | 1.32  | Normal up vs Off IS Tolerant   |
| 231215_PM_at   | ---                                                                       | ---                                                                                           | 0.00056 | 1.50  | Normal up vs Off IS Tolerant   |
| 235587_PM_at   | LOC202781                                                                 | hypothetical LOC202781                                                                        | 0.00056 | 1.77  | Normal up vs Off IS Tolerant   |

|                 |                        |                                                                           |         |       |                                |
|-----------------|------------------------|---------------------------------------------------------------------------|---------|-------|--------------------------------|
| 243252_PM_at    | ---                    | ---                                                                       | 0.00056 | -1.39 | Normal down vs Off IS Tolerant |
| 225488_PM_at    | DERL1                  | Der1-like domain family, member 1                                         | 0.00056 | 1.37  | Normal up vs Off IS Tolerant   |
| 1556560_PM_a_at | LOC100128071           | similar to hCG41624                                                       | 0.00056 | 1.37  | Normal up vs Off IS Tolerant   |
| 1564211_PM_at   | C14orf64               | chromosome 14 open reading frame 64                                       | 0.00056 | 1.51  | Normal up vs Off IS Tolerant   |
| 219640_PM_at    | CLDN15                 | claudin 15                                                                | 0.00056 | 1.39  | Normal up vs Off IS Tolerant   |
| 229629_PM_at    | ---                    | ---                                                                       | 0.00056 | 1.95  | Normal up vs Off IS Tolerant   |
| 206789_PM_s_at  | POU2F1                 | POU class 2 homeobox 1                                                    | 0.00056 | 1.35  | Normal up vs Off IS Tolerant   |
| 1563898_PM_at   | ---                    | ---                                                                       | 0.00056 | -1.37 | Normal down vs Off IS Tolerant |
| 232722_PM_at    | RNASSET2               | ribonuclease T2                                                           | 0.00056 | 1.75  | Normal up vs Off IS Tolerant   |
| 244046_PM_at    | URGCP                  | upregulator of cell proliferation                                         | 0.00056 | 1.68  | Normal up vs Off IS Tolerant   |
| 236313_PM_at    | CDKN2B                 | cyclin-dependent kinase inhibitor 2B (p15, inhibits CDK4)                 | 0.00056 | -1.39 | Normal down vs Off IS Tolerant |
| 225251_PM_at    | RAB24                  | RAB24, member RAS oncogene family                                         | 0.00056 | -1.34 | Normal down vs Off IS Tolerant |
| 155529_PM_at    | RNH1                   | ribonuclease/angiogenin inhibitor 1                                       | 0.00057 | -1.24 | Normal down vs Off IS Tolerant |
| 219828_PM_at    | C9orf86                | chromosome 9 open reading frame 86                                        | 0.00057 | 1.37  | Normal up vs Off IS Tolerant   |
| 1557398_PM_at   | ---                    | ---                                                                       | 0.00057 | -1.29 | Normal down vs Off IS Tolerant |
| 238797_PM_at    | TRIM11                 | tripartite motif-containing 11                                            | 0.00057 | 1.82  | Normal up vs Off IS Tolerant   |
| 225615_PM_at    | IFFO2                  | intermediate filament family orphan 2                                     | 0.00057 | 1.52  | Normal up vs Off IS Tolerant   |
| 1552717_PM_s_at | CEP170 ///<br>CEP170P1 | centrosomal protein 170kDa ///<br>centrosomal protein 170kDa pseudogene 1 | 0.00057 | -1.49 | Normal down vs Off IS Tolerant |
| 203366_PM_at    | POLG                   | polymerase (DNA directed), gamma                                          | 0.00057 | 1.23  | Normal up vs Off IS Tolerant   |
| 212660_PM_at    | PHF15                  | PHD finger protein 15                                                     | 0.00057 | 1.72  | Normal up vs Off IS Tolerant   |
| 1553749_PM_at   | FAM76B                 | family with sequence similarity 76, member B                              | 0.00057 | 1.86  | Normal up vs Off IS Tolerant   |
| 238869_PM_at    | ---                    | ---                                                                       | 0.00057 | -1.51 | Normal down vs Off IS Tolerant |
| 208841_PM_s_at  | G3BP2                  | GTPase activating protein (SH3 domain) binding protein 2                  | 0.00057 | 1.36  | Normal up vs Off IS Tolerant   |

|                |           |                                                                                         |         |       |                                |
|----------------|-----------|-----------------------------------------------------------------------------------------|---------|-------|--------------------------------|
| 213475_PM_s_at | ITGAL     | integrin, alpha L (antigen CD11A (p180), lymphocyte function-associated antigen 1; alph | 0.00057 | 1.33  | Normal up vs Off IS Tolerant   |
| 223165_PM_s_at | IP6K2     | inositol hexakisphosphate kinase 2                                                      | 0.00057 | 1.83  | Normal up vs Off IS Tolerant   |
| 229180_PM_at   | WWC1      | WW and C2 domain containing 1                                                           | 0.00057 | -1.28 | Normal down vs Off IS Tolerant |
| 225385_PM_s_at | HNRPLL    | heterogeneous nuclear ribonucleoprotein L-like                                          | 0.00058 | 1.46  | Normal up vs Off IS Tolerant   |
| 211444_PM_at   | ---       | ---                                                                                     | 0.00058 | 1.49  | Normal up vs Off IS Tolerant   |
| 201761_PM_at   | MTHFD2    | methylenetetrahydrofolate dehydrogenase (NADP+ dependent) 2, methenyltetrahydrofolate c | 0.00058 | -1.33 | Normal down vs Off IS Tolerant |
| 202163_PM_s_at | CNOT8     | CCR4-NOT transcription complex, subunit 8                                               | 0.00058 | 1.28  | Normal up vs Off IS Tolerant   |
| 216004_PM_s_at | PKNOX1    | PBX/knotted 1 homeobox 1                                                                | 0.00058 | -1.29 | Normal down vs Off IS Tolerant |
| 233515_PM_at   | ---       | ---                                                                                     | 0.00058 | 1.56  | Normal up vs Off IS Tolerant   |
| 243888_PM_at   | ---       | ---                                                                                     | 0.00058 | 1.83  | Normal up vs Off IS Tolerant   |
| 226892_PM_at   | C10orf12  | chromosome 10 open reading frame 12                                                     | 0.00058 | 1.55  | Normal up vs Off IS Tolerant   |
| 228710_PM_at   | ---       | ---                                                                                     | 0.00058 | 1.50  | Normal up vs Off IS Tolerant   |
| 220323_PM_at   | CNTD2     | cyclin N-terminal domain containing 2                                                   | 0.00058 | -1.35 | Normal down vs Off IS Tolerant |
| 239168_PM_at   | LOC150622 | hypothetical LOC150622                                                                  | 0.00058 | -1.35 | Normal down vs Off IS Tolerant |
| 225237_PM_s_at | MSI2      | musashi homolog 2 (Drosophila)                                                          | 0.00058 | 1.80  | Normal up vs Off IS Tolerant   |
| 229555_PM_at   | GALNT5    | UDP-N-acetyl-alpha-D-galactosamine:polypeptide N-acetylgalactosaminyltransferase 5 (Gal | 0.00058 | -1.37 | Normal down vs Off IS Tolerant |
| 208577_PM_at   | HIST1H3C  | histone cluster 1, H3c                                                                  | 0.00059 | 1.20  | Normal up vs Off IS Tolerant   |
| 232077_PM_s_at | YPEL3     | yippee-like 3 (Drosophila)                                                              | 0.00059 | 1.66  | Normal up vs Off IS Tolerant   |
| 213239_PM_at   | PIBF1     | progesterone immunomodulatory binding factor 1                                          | 0.00059 | 1.46  | Normal up vs Off IS Tolerant   |
| 210607_PM_at   | FLT3LG    | fms-related tyrosine kinase 3 ligand                                                    | 0.00059 | 2.03  | Normal up vs Off IS Tolerant   |

|                 |              |                                                                      |         |       |                                |
|-----------------|--------------|----------------------------------------------------------------------|---------|-------|--------------------------------|
| 237699_PM_at    | LOC100507040 | hypothetical LOC100507040                                            | 0.00059 | -1.23 | Normal down vs Off IS Tolerant |
| 220319_PM_s_at  | MYLIP        | myosin regulatory light chain interacting protein                    | 0.00059 | 1.74  | Normal up vs Off IS Tolerant   |
| 221014_PM_s_at  | RAB33B       | RAB33B, member RAS oncogene family                                   | 0.00059 | 1.55  | Normal up vs Off IS Tolerant   |
| 232202_PM_at    | ---          | ---                                                                  | 0.00059 | -1.43 | Normal down vs Off IS Tolerant |
| 238913_PM_at    | ---          | ---                                                                  | 0.00059 | 1.65  | Normal up vs Off IS Tolerant   |
| 207926_PM_at    | GP5          | glycoprotein V (platelet)                                            | 0.00059 | 1.50  | Normal up vs Off IS Tolerant   |
| 1558249_PM_s_at | STX16        | syntaxin 16                                                          | 0.00059 | 1.76  | Normal up vs Off IS Tolerant   |
| 219918_PM_s_at  | ASPM         | asp (abnormal spindle) homolog, microcephaly associated (Drosophila) | 0.00059 | -1.68 | Normal down vs Off IS Tolerant |
| 210563_PM_x_at  | CFLAR        | CASP8 and FADD-like apoptosis regulator                              | 0.00059 | 1.69  | Normal up vs Off IS Tolerant   |
| 204534_PM_at    | VTN          | vitronectin                                                          | 0.00059 | -1.30 | Normal down vs Off IS Tolerant |
| 214173_PM_x_at  | C19orf2      | chromosome 19 open reading frame 2                                   | 0.00059 | 1.31  | Normal up vs Off IS Tolerant   |
| 204323_PM_x_at  | NF1          | neurofibromin 1                                                      | 0.00060 | -1.57 | Normal down vs Off IS Tolerant |
| 215735_PM_s_at  | TSC2         | tuberous sclerosis 2                                                 | 0.00060 | 1.54  | Normal up vs Off IS Tolerant   |
| 232160_PM_s_at  | TNIP2        | TNFAIP3 interacting protein 2                                        | 0.00060 | 1.26  | Normal up vs Off IS Tolerant   |
| 228577_PM_x_at  | ODF2L        | outer dense fiber of sperm tails 2-like                              | 0.00060 | 2.00  | Normal up vs Off IS Tolerant   |
| 212709_PM_at    | NUP160       | nucleoporin 160kDa                                                   | 0.00060 | 1.77  | Normal up vs Off IS Tolerant   |
| 241779_PM_at    | MTX3         | metaxin 3                                                            | 0.00060 | 1.31  | Normal up vs Off IS Tolerant   |
| 214608_PM_s_at  | EYA1         | eyes absent homolog 1 (Drosophila)                                   | 0.00060 | -1.48 | Normal down vs Off IS Tolerant |
| 1555884_PM_at   | PSMD6        | Proteasome (prosome, macropain) 26S subunit, non-ATPase, 6           | 0.00061 | 1.52  | Normal up vs Off IS Tolerant   |
| 206894_PM_at    | APOA4        | apolipoprotein A-IV                                                  | 0.00061 | -1.25 | Normal down vs Off IS Tolerant |
| 219628_PM_at    | ZMAT3        | zinc finger, matrin-type 3                                           | 0.00061 | 1.60  | Normal up vs Off IS Tolerant   |
| 1569554_PM_at   | ESR2         | Estrogen receptor 2 (ER beta)                                        | 0.00061 | -1.52 | Normal down vs Off IS Tolerant |
| 36552_PM_at     | C2CD3        | C2 calcium-dependent domain containing 3                             | 0.00061 | 1.33  | Normal up vs Off IS Tolerant   |

|                |           |                                                             |         |       |                                |
|----------------|-----------|-------------------------------------------------------------|---------|-------|--------------------------------|
| 242110_PM_at   | ---       | ---                                                         | 0.00061 | 1.70  | Normal up vs Off IS Tolerant   |
| 226389_PM_s_at | RAPGEF1   | Rap guanine nucleotide exchange factor (GEF) 1              | 0.00061 | 1.44  | Normal up vs Off IS Tolerant   |
| 209724_PM_s_at | ZFP161    | zinc finger protein 161 homolog (mouse)                     | 0.00061 | 1.45  | Normal up vs Off IS Tolerant   |
| 223339_PM_at   | ATPIF1    | ATPase inhibitory factor 1                                  | 0.00061 | 1.74  | Normal up vs Off IS Tolerant   |
| 244047_PM_at   | ---       | ---                                                         | 0.00061 | 1.80  | Normal up vs Off IS Tolerant   |
| 202253_PM_s_at | DNM2      | dynamin 2                                                   | 0.00061 | 1.30  | Normal up vs Off IS Tolerant   |
| 221991_PM_at   | NXPH3     | neurexophilin 3                                             | 0.00062 | -1.39 | Normal down vs Off IS Tolerant |
| 232114_PM_at   | MED12L    | mediator complex subunit 12-like                            | 0.00062 | -1.88 | Normal down vs Off IS Tolerant |
| 226327_PM_at   | ZNF507    | zinc finger protein 507                                     | 0.00062 | 1.80  | Normal up vs Off IS Tolerant   |
| 244313_PM_at   | CR1       | complement component (3b/4b) receptor 1 (Knops blood group) | 0.00062 | -1.73 | Normal down vs Off IS Tolerant |
| 1566949_PM_at  | ---       | ---                                                         | 0.00062 | -1.50 | Normal down vs Off IS Tolerant |
| 205639_PM_at   | AOAH      | acyloxyacyl hydrolase (neutrophil)                          | 0.00062 | -1.44 | Normal down vs Off IS Tolerant |
| 1569112_PM_at  | SLC44A5   | solute carrier family 44, member 5                          | 0.00062 | -1.30 | Normal down vs Off IS Tolerant |
| 1561978_PM_at  | LOC284798 | hypothetical LOC284798                                      | 0.00062 | -1.30 | Normal down vs Off IS Tolerant |
| 235227_PM_at   | ---       | ---                                                         | 0.00062 | 1.54  | Normal up vs Off IS Tolerant   |
| 213025_PM_at   | THUMPD1   | THUMP domain containing 1                                   | 0.00062 | 1.25  | Normal up vs Off IS Tolerant   |
| 205108_PM_s_at | APOB      | apolipoprotein B (including Ag(x) antigen)                  | 0.00062 | -1.41 | Normal down vs Off IS Tolerant |
| 208232_PM_x_at | ---       | ---                                                         | 0.00062 | -1.33 | Normal down vs Off IS Tolerant |
| 222607_PM_s_at | DIS3      | DIS3 mitotic control homolog (S. cerevisiae)                | 0.00062 | 1.70  | Normal up vs Off IS Tolerant   |
| 1558794_PM_at  | LOC728190 | Hypothetical LOC728190                                      | 0.00062 | -1.84 | Normal down vs Off IS Tolerant |
| 214623_PM_at   | FBXW4P1   | F-box and WD repeat domain containing 4 pseudogene 1        | 0.00063 | 1.52  | Normal up vs Off IS Tolerant   |

|                 |           |                                                                                  |         |       |                                |
|-----------------|-----------|----------------------------------------------------------------------------------|---------|-------|--------------------------------|
| 205087_PM_at    | RWDD3     | RWD domain containing 3                                                          | 0.00063 | 1.52  | Normal up vs Off IS Tolerant   |
| 227216_PM_at    | RLTPR     | RGD motif, leucine rich repeats, tropomodulin domain and proline-rich containing | 0.00063 | 1.34  | Normal up vs Off IS Tolerant   |
| 235553_PM_at    | GAPVD1    | GTPase activating protein and VPS9 domains 1                                     | 0.00063 | 1.41  | Normal up vs Off IS Tolerant   |
| 228423_PM_at    | MAP9      | microtubule-associated protein 9                                                 | 0.00063 | 1.75  | Normal up vs Off IS Tolerant   |
| 218422_PM_s_at  | RBM26     | RNA binding motif protein 26                                                     | 0.00063 | 1.34  | Normal up vs Off IS Tolerant   |
| 201401_PM_s_at  | ADRBK1    | adrenergic, beta, receptor kinase 1                                              | 0.00063 | 1.70  | Normal up vs Off IS Tolerant   |
| 206888_PM_s_at  | ARHGDI3   | Rho GDP dissociation inhibitor (GDI) gamma                                       | 0.00063 | -1.36 | Normal down vs Off IS Tolerant |
| 210849_PM_s_at  | VPS41     | vacuolar protein sorting 41 homolog (S. cerevisiae)                              | 0.00063 | -1.55 | Normal down vs Off IS Tolerant |
| 226873_PM_at    | ---       | ---                                                                              | 0.00064 | 1.76  | Normal up vs Off IS Tolerant   |
| 230351_PM_at    | LOC283481 | hypothetical LOC283481                                                           | 0.00064 | -1.26 | Normal down vs Off IS Tolerant |
| 1554471_PM_a_at | ANKRD13C  | ankyrin repeat domain 13C                                                        | 0.00064 | 1.55  | Normal up vs Off IS Tolerant   |
| 203104_PM_at    | CSF1R     | colony stimulating factor 1 receptor                                             | 0.00064 | -1.57 | Normal down vs Off IS Tolerant |
| 224190_PM_x_at  | NOD1      | nucleotide-binding oligomerization domain containing 1                           | 0.00064 | 1.39  | Normal up vs Off IS Tolerant   |
| 201486_PM_at    | RCN2      | reticulocalbin 2, EF-hand calcium binding domain                                 | 0.00064 | 1.43  | Normal up vs Off IS Tolerant   |
| 216177_PM_at    | ---       | ---                                                                              | 0.00065 | 1.42  | Normal up vs Off IS Tolerant   |
| 230384_PM_at    | ---       | ---                                                                              | 0.00065 | 1.52  | Normal up vs Off IS Tolerant   |
| 230445_PM_at    | BTBD17    | BTB (POZ) domain containing 17                                                   | 0.00065 | -1.23 | Normal down vs Off IS Tolerant |
| 241365_PM_at    | SATB1     | SATB homeobox 1                                                                  | 0.00065 | 2.16  | Normal up vs Off IS Tolerant   |
| 221587_PM_s_at  | C19orf24  | chromosome 19 open reading frame 24                                              | 0.00065 | 1.43  | Normal up vs Off IS Tolerant   |
| 209569_PM_x_at  | D4S234E   | DNA segment on chromosome 4 (unique) 234 expressed sequence                      | 0.00065 | 1.83  | Normal up vs Off IS Tolerant   |
| 207786_PM_at    | CYP2R1    | Cytochrome P450, family 2, subfamily R, polypeptide 1                            | 0.00065 | 1.60  | Normal up vs Off IS Tolerant   |

|                 |          |                                                                  |         |       |                                |
|-----------------|----------|------------------------------------------------------------------|---------|-------|--------------------------------|
| 215190_PM_at    | EIF3M    | eukaryotic translation initiation factor 3, subunit M            | 0.00065 | 1.72  | Normal up vs Off IS Tolerant   |
| 1552875_PM_a_at | CD200R1  | CD200 receptor 1                                                 | 0.00065 | -1.48 | Normal down vs Off IS Tolerant |
| 212584_PM_at    | AQR      | aquarius homolog (mouse)                                         | 0.00065 | 1.37  | Normal up vs Off IS Tolerant   |
| 234246_PM_at    | ---      | ---                                                              | 0.00066 | -1.31 | Normal down vs Off IS Tolerant |
| 214171_PM_s_at  | U2AF2    | U2 small nuclear RNA auxiliary factor 2                          | 0.00066 | -1.26 | Normal down vs Off IS Tolerant |
| 220423_PM_at    | PLA2G2D  | phospholipase A2, group IID                                      | 0.00066 | -1.30 | Normal down vs Off IS Tolerant |
| 226245_PM_at    | KCTD1    | potassium channel tetramerisation domain containing 1            | 0.00066 | -1.88 | Normal down vs Off IS Tolerant |
| 44696_PM_at     | TBC1D13  | TBC1 domain family, member 13                                    | 0.00066 | 1.23  | Normal up vs Off IS Tolerant   |
| 235027_PM_at    | ---      | ---                                                              | 0.00066 | 1.40  | Normal up vs Off IS Tolerant   |
| 205429_PM_s_at  | MPP6     | membrane protein, palmitoylated 6 (MAGUK p55 subfamily member 6) | 0.00066 | 1.41  | Normal up vs Off IS Tolerant   |
| 212742_PM_at    | RNF115   | ring finger protein 115                                          | 0.00066 | 1.38  | Normal up vs Off IS Tolerant   |
| 224918_PM_x_at  | MGST1    | microsomal glutathione S-transferase 1                           | 0.00066 | -1.83 | Normal down vs Off IS Tolerant |
| 226547_PM_at    | MYST3    | MYST histone acetyltransferase (monocytic leukemia) 3            | 0.00066 | 1.49  | Normal up vs Off IS Tolerant   |
| 231817_PM_at    | USP53    | ubiquitin specific peptidase 53                                  | 0.00066 | 1.72  | Normal up vs Off IS Tolerant   |
| 237025_PM_at    | ---      | ---                                                              | 0.00066 | 1.32  | Normal up vs Off IS Tolerant   |
| 33132_PM_at     | CPSF1    | cleavage and polyadenylation specific factor 1, 160kDa           | 0.00066 | 1.58  | Normal up vs Off IS Tolerant   |
| 1554082_PM_a_at | NOL9     | nucleolar protein 9                                              | 0.00066 | 1.58  | Normal up vs Off IS Tolerant   |
| 230811_PM_at    | C16orf55 | chromosome 16 open reading frame 55                              | 0.00067 | 1.55  | Normal up vs Off IS Tolerant   |
| 241654_PM_at    | ---      | ---                                                              | 0.00067 | -2.83 | Normal down vs Off IS Tolerant |
| 237722_PM_at    | FLI1     | Friend leukemia virus integration 1                              | 0.00067 | -1.29 | Normal down vs Off IS Tolerant |
| 231918_PM_s_at  | GFM2     | G elongation factor, mitochondrial 2                             | 0.00067 | -1.42 | Normal down vs Off IS Tolerant |



|                 |           |                                                                                          |         |       |                                |
|-----------------|-----------|------------------------------------------------------------------------------------------|---------|-------|--------------------------------|
| 240173_PM_at    | ---       | ---                                                                                      | 0.00067 | 1.62  | Normal up vs Off IS Tolerant   |
| 220940_PM_at    | ANKRD36B  | ankyrin repeat domain 36B                                                                | 0.00067 | 1.65  | Normal up vs Off IS Tolerant   |
| 228532_PM_at    | C1orf162  | chromosome 1 open reading frame 162                                                      | 0.00067 | -1.34 | Normal down vs Off IS Tolerant |
| 228611_PM_s_at  | ---       | ---                                                                                      | 0.00067 | 1.54  | Normal up vs Off IS Tolerant   |
| 226883_PM_at    | ---       | ---                                                                                      | 0.00067 | 1.39  | Normal up vs Off IS Tolerant   |
| 204995_PM_at    | CDK5R1    | cyclin-dependent kinase 5, regulatory subunit 1 (p35)                                    | 0.00067 | 2.18  | Normal up vs Off IS Tolerant   |
| 40465_PM_at     | DDX23     | DEAD (Asp-Glu-Ala-Asp) box polypeptide 23                                                | 0.00067 | 1.49  | Normal up vs Off IS Tolerant   |
| 225635_PM_s_at  | LOC401504 | hypothetical LOC401504                                                                   | 0.00067 | 1.64  | Normal up vs Off IS Tolerant   |
| 234280_PM_at    | REG3A     | regenerating islet-derived 3 alpha                                                       | 0.00068 | -1.28 | Normal down vs Off IS Tolerant |
| 1567101_PM_at   | ---       | ---                                                                                      | 0.00068 | -1.45 | Normal down vs Off IS Tolerant |
| 200638_PM_s_at  | YWHAZ     | tyrosine 3-monooxygenase/tryptophan 5-monooxygenase activation protein, zeta polypeptid  | 0.00068 | 1.33  | Normal up vs Off IS Tolerant   |
| 1553348_PM_a_at | NFX1      | nuclear transcription factor, X-box binding 1                                            | 0.00068 | 1.66  | Normal up vs Off IS Tolerant   |
| 236653_PM_at    | LOC148189 | Hypothetical LOC148189                                                                   | 0.00068 | -1.33 | Normal down vs Off IS Tolerant |
| 235882_PM_at    | VPS53     | vacuolar protein sorting 53 homolog (S. cerevisiae)                                      | 0.00068 | 1.96  | Normal up vs Off IS Tolerant   |
| 32723_PM_at     | CSTF1     | cleavage stimulation factor, 3' pre-RNA, subunit 1, 50kDa                                | 0.00068 | 1.26  | Normal up vs Off IS Tolerant   |
| 46665_PM_at     | SEMA4C    | sema domain, immunoglobulin domain (Ig), transmembrane domain (TM) and short cytoplasmic | 0.00068 | 1.64  | Normal up vs Off IS Tolerant   |
| 1558885_PM_at   | ---       | ---                                                                                      | 0.00068 | -1.27 | Normal down vs Off IS Tolerant |
| 1568939_PM_at   | ---       | ---                                                                                      | 0.00068 | -1.37 | Normal down vs Off IS Tolerant |
| 236839_PM_at    | ---       | ---                                                                                      | 0.00069 | 1.39  | Normal up vs Off IS Tolerant   |

|                 |                                            |                                                                                        |         |       |                                |
|-----------------|--------------------------------------------|----------------------------------------------------------------------------------------|---------|-------|--------------------------------|
| 227415_PM_at    | LOC283508                                  | hypothetical protein LOC283508                                                         | 0.00069 | 1.68  | Normal up vs Off IS Tolerant   |
| 235817_PM_at    | TMEM184A                                   | transmembrane protein 184A                                                             | 0.00069 | -1.49 | Normal down vs Off IS Tolerant |
| 204432_PM_at    | SOX12                                      | SRY (sex determining region Y)-box 12                                                  | 0.00069 | 1.31  | Normal up vs Off IS Tolerant   |
| 203899_PM_s_at  | CRCP                                       | CGRP receptor component                                                                | 0.00069 | -1.38 | Normal down vs Off IS Tolerant |
| 205830_PM_at    | CLGN                                       | calmegin                                                                               | 0.00069 | -2.14 | Normal down vs Off IS Tolerant |
| 1562878_PM_at   | ---                                        | ---                                                                                    | 0.00069 | -1.33 | Normal down vs Off IS Tolerant |
| 223327_PM_x_at  | LOC727751 ///<br>LOC727849 ///<br>LOC80154 | hypothetical LOC727751 /// golgin A2<br>pseudogene /// hypothetical LOC80154           | 0.00069 | 1.38  | Normal up vs Off IS Tolerant   |
| 1562572_PM_at   | ---                                        | ---                                                                                    | 0.00069 | 1.26  | Normal up vs Off IS Tolerant   |
| 214028_PM_x_at  | TDRD3                                      | tudor domain containing 3                                                              | 0.00070 | 1.35  | Normal up vs Off IS Tolerant   |
| 222164_PM_at    | FGFR1                                      | fibroblast growth factor receptor 1                                                    | 0.00070 | 1.55  | Normal up vs Off IS Tolerant   |
| 217003_PM_s_at  | ADAM5P                                     | ADAM metalloproteinase domain 5,<br>pseudogene                                         | 0.00070 | -1.42 | Normal down vs Off IS Tolerant |
| 240221_PM_at    | ---                                        | ---                                                                                    | 0.00070 | 2.69  | Normal up vs Off IS Tolerant   |
| 243718_PM_at    | ---                                        | ---                                                                                    | 0.00070 | -1.73 | Normal down vs Off IS Tolerant |
| 233184_PM_at    | EPHA6                                      | EPH receptor A6                                                                        | 0.00070 | -1.94 | Normal down vs Off IS Tolerant |
| 234275_PM_at    | ---                                        | ---                                                                                    | 0.00070 | -1.27 | Normal down vs Off IS Tolerant |
| 1555972_PM_s_at | FBXO28                                     | F-box protein 28                                                                       | 0.00070 | -1.66 | Normal down vs Off IS Tolerant |
| 235135_PM_at    | TAF10                                      | TAF10 RNA polymerase II, TATA box<br>binding protein (TBP)-associated factor,<br>30kDa | 0.00070 | 1.41  | Normal up vs Off IS Tolerant   |
| 222539_PM_at    | CLN6                                       | ceroid-lipofuscinosis, neuronal 6, late<br>infantile, variant                          | 0.00070 | -1.39 | Normal down vs Off IS Tolerant |
| 232247_PM_at    | ZNF502                                     | zinc finger protein 502                                                                | 0.00070 | 1.82  | Normal up vs Off IS Tolerant   |
| 204903_PM_x_at  | ATG4B                                      | ATG4 autophagy related 4 homolog B (S.<br>cerevisiae)                                  | 0.00070 | 1.39  | Normal up vs Off IS Tolerant   |

|                 |           |                                                                  |         |       |                                |
|-----------------|-----------|------------------------------------------------------------------|---------|-------|--------------------------------|
| 1558706_PM_a_at | ATOH8     | Atonal homolog 8 (Drosophila)                                    | 0.00071 | -1.23 | Normal down vs Off IS Tolerant |
| 1564474_PM_at   | LOC728723 | hypothetical LOC728723                                           | 0.00071 | -1.35 | Normal down vs Off IS Tolerant |
| 215460_PM_x_at  | BRD1      | bromodomain containing 1                                         | 0.00071 | 1.66  | Normal up vs Off IS Tolerant   |
| 1568924_PM_a_at | IQUB      | IQ motif and ubiquitin domain containing                         | 0.00071 | -2.05 | Normal down vs Off IS Tolerant |
| 243423_PM_at    | ---       | ---                                                              | 0.00071 | 1.85  | Normal up vs Off IS Tolerant   |
| 218895_PM_at    | GPATCH3   | G patch domain containing 3                                      | 0.00071 | 1.53  | Normal up vs Off IS Tolerant   |
| 1567242_PM_at   | OR2L1P    | olfactory receptor, family 2, subfamily L, member 1 pseudogene   | 0.00071 | -1.30 | Normal down vs Off IS Tolerant |
| 202616_PM_s_at  | MECP2     | methyl CpG binding protein 2 (Rett syndrome)                     | 0.00071 | 1.47  | Normal up vs Off IS Tolerant   |
| 240867_PM_at    | ---       | ---                                                              | 0.00071 | 1.58  | Normal up vs Off IS Tolerant   |
| 221311_PM_x_at  | LYRM2     | LYR motif containing 2                                           | 0.00072 | 1.69  | Normal up vs Off IS Tolerant   |
| 216554_PM_s_at  | ---       | ---                                                              | 0.00072 | -1.32 | Normal down vs Off IS Tolerant |
| 227836_PM_at    | UTP23     | UTP23, small subunit (SSU) processome component, homolog (yeast) | 0.00072 | 1.52  | Normal up vs Off IS Tolerant   |
| 228020_PM_at    | PTCD3     | Pentatricopeptide repeat domain 3                                | 0.00072 | 1.67  | Normal up vs Off IS Tolerant   |
| 214815_PM_at    | TRIM33    | tripartite motif-containing 33                                   | 0.00072 | 1.73  | Normal up vs Off IS Tolerant   |
| 236538_PM_at    | GRIA2     | glutamate receptor, ionotropic, AMPA 2                           | 0.00072 | -1.33 | Normal down vs Off IS Tolerant |
| 224888_PM_at    | EPT1      | ethanolaminephosphotransferase 1 (CDP-ethanolamine-specific)     | 0.00072 | 1.46  | Normal up vs Off IS Tolerant   |
| 210370_PM_s_at  | LY9       | lymphocyte antigen 9                                             | 0.00073 | 2.00  | Normal up vs Off IS Tolerant   |
| 236664_PM_at    | AKT2      | v-akt murine thymoma viral oncogene homolog 2                    | 0.00073 | 1.37  | Normal up vs Off IS Tolerant   |
| 231838_PM_at    | PABPC1L   | poly(A) binding protein, cytoplasmic 1-like                      | 0.00073 | 1.57  | Normal up vs Off IS Tolerant   |
| 212946_PM_at    | KIAA0564  | KIAA0564                                                         | 0.00073 | 1.52  | Normal up vs Off IS Tolerant   |
| 1555352_PM_at   | FOXP2     | forkhead box P2                                                  | 0.00073 | -1.33 | Normal down vs Off IS Tolerant |

|                 |           |                                                                       |         |       |                                |
|-----------------|-----------|-----------------------------------------------------------------------|---------|-------|--------------------------------|
| 208029_PM_s_at  | LAPTM4B   | lysosomal protein transmembrane 4 beta                                | 0.00073 | 1.50  | Normal up vs Off IS Tolerant   |
| 41856_PM_at     | UNC5B     | unc-5 homolog B (C. elegans)                                          | 0.00073 | -1.39 | Normal down vs Off IS Tolerant |
| 1554085_PM_at   | DDX51     | DEAD (Asp-Glu-Ala-Asp) box polypeptide 51                             | 0.00074 | 1.70  | Normal up vs Off IS Tolerant   |
| 212751_PM_at    | UBE2N     | ubiquitin-conjugating enzyme E2N (UBC13 homolog, yeast)               | 0.00074 | 1.44  | Normal up vs Off IS Tolerant   |
| 234964_PM_at    | TRD@      | T cell receptor delta locus                                           | 0.00074 | 1.74  | Normal up vs Off IS Tolerant   |
| 223304_PM_at    | SLC37A3   | solute carrier family 37 (glycerol-3-phosphate transporter), member 3 | 0.00074 | 1.79  | Normal up vs Off IS Tolerant   |
| 202496_PM_at    | EDC4      | enhancer of mRNA decapping 4                                          | 0.00074 | 1.33  | Normal up vs Off IS Tolerant   |
| 239799_PM_at    | C9orf130  | chromosome 9 open reading frame 130                                   | 0.00074 | 1.59  | Normal up vs Off IS Tolerant   |
| 202739_PM_s_at  | PHKB      | phosphorylase kinase, beta                                            | 0.00074 | 1.58  | Normal up vs Off IS Tolerant   |
| 203469_PM_s_at  | CDK10     | cyclin-dependent kinase 10                                            | 0.00074 | 1.42  | Normal up vs Off IS Tolerant   |
| 1555836_PM_at   | POLR2B    | Polymerase (RNA) II (DNA directed) polypeptide B, 140kDa              | 0.00075 | 1.33  | Normal up vs Off IS Tolerant   |
| 239958_PM_at    | LOC253039 | hypothetical LOC253039                                                | 0.00075 | -1.31 | Normal down vs Off IS Tolerant |
| 1560901_PM_at   | LOC728789 | Hypothetical LOC728789                                                | 0.00075 | -1.25 | Normal down vs Off IS Tolerant |
| 1554271_PM_a_at | CENPL     | centromere protein L                                                  | 0.00075 | 1.48  | Normal up vs Off IS Tolerant   |
| 217804_PM_s_at  | ILF3      | interleukin enhancer binding factor 3, 90kDa                          | 0.00075 | 1.31  | Normal up vs Off IS Tolerant   |
| 218906_PM_x_at  | KLC2      | kinesin light chain 2                                                 | 0.00075 | 1.29  | Normal up vs Off IS Tolerant   |
| 218266_PM_s_at  | NCS1      | neuronal calcium sensor 1                                             | 0.00075 | -1.58 | Normal down vs Off IS Tolerant |
| 214222_PM_at    | DNAH7     | dynein, axonemal, heavy chain 7                                       | 0.00075 | -1.77 | Normal down vs Off IS Tolerant |
| 1553306_PM_at   | CASP8     | caspase 8, apoptosis-related cysteine peptidase                       | 0.00075 | -1.28 | Normal down vs Off IS Tolerant |
| 242194_PM_at    | CUL4A     | Cullin 4A                                                             | 0.00076 | 1.46  | Normal up vs Off IS Tolerant   |
| 225389_PM_at    | BTBD6     | BTB (POZ) domain containing 6                                         | 0.00076 | 1.26  | Normal up vs Off IS Tolerant   |
| 222820_PM_at    | TNRC6C    | trinucleotide repeat containing 6C                                    | 0.00076 | 1.72  | Normal up vs Off IS Tolerant   |

|                 |           |                                                                      |         |       |                                |
|-----------------|-----------|----------------------------------------------------------------------|---------|-------|--------------------------------|
| 240106_PM_at    | GNPTAB    | N-acetylglucosamine-1-phosphate transferase, alpha and beta subunits | 0.00076 | -1.46 | Normal down vs Off IS Tolerant |
| 1561759_PM_at   | LOC645513 | Hypothetical LOC645513                                               | 0.00076 | 1.74  | Normal up vs Off IS Tolerant   |
| 240102_PM_at    | ---       | ---                                                                  | 0.00076 | 1.83  | Normal up vs Off IS Tolerant   |
| 204237_PM_at    | GULP1     | GULP, engulfment adaptor PTB domain containing 1                     | 0.00076 | -1.26 | Normal down vs Off IS Tolerant |
| 205486_PM_at    | TESK2     | testis-specific kinase 2                                             | 0.00076 | 1.43  | Normal up vs Off IS Tolerant   |
| 205237_PM_at    | FCN1      | ficolin (collagen/fibrinogen domain containing) 1                    | 0.00076 | -1.43 | Normal down vs Off IS Tolerant |
| 208521_PM_at    | OR5I1     | olfactory receptor, family 5, subfamily I, member 1                  | 0.00077 | -1.59 | Normal down vs Off IS Tolerant |
| 1566602_PM_at   | RPUSD3    | RNA pseudouridylate synthase domain containing 3                     | 0.00077 | -1.26 | Normal down vs Off IS Tolerant |
| 218726_PM_at    | HJURP     | Holliday junction recognition protein                                | 0.00077 | -1.35 | Normal down vs Off IS Tolerant |
| 1553220_PM_at   | FAM117B   | family with sequence similarity 117, member B                        | 0.00077 | 1.47  | Normal up vs Off IS Tolerant   |
| 239324_PM_at    | ---       | ---                                                                  | 0.00077 | 1.43  | Normal up vs Off IS Tolerant   |
| 221825_PM_at    | ANGEL2    | angel homolog 2 (Drosophila)                                         | 0.00077 | 1.47  | Normal up vs Off IS Tolerant   |
| 203468_PM_at    | CDK10     | cyclin-dependent kinase 10                                           | 0.00077 | 1.54  | Normal up vs Off IS Tolerant   |
| 1568971_PM_at   | C14orf135 | chromosome 14 open reading frame 135                                 | 0.00077 | -2.01 | Normal down vs Off IS Tolerant |
| 242532_PM_at    | ---       | ---                                                                  | 0.00077 | -1.27 | Normal down vs Off IS Tolerant |
| 1568834_PM_s_at | CCDC90B   | coiled-coil domain containing 90B                                    | 0.00077 | 1.62  | Normal up vs Off IS Tolerant   |
| 240017_PM_at    | LOC400960 | Hypothetical gene supported by BC040598                              | 0.00077 | -1.29 | Normal down vs Off IS Tolerant |
| 202890_PM_at    | MAP7      | microtubule-associated protein 7                                     | 0.00077 | -1.55 | Normal down vs Off IS Tolerant |
| 232906_PM_at    | ---       | ---                                                                  | 0.00077 | 1.60  | Normal up vs Off IS Tolerant   |
| 206488_PM_s_at  | CD36      | CD36 molecule (thrombospondin receptor)                              | 0.00077 | -1.60 | Normal down vs Off IS Tolerant |
| 204372_PM_s_at  | KHSRP     | KH-type splicing regulatory protein                                  | 0.00078 | 1.37  | Normal up vs Off IS Tolerant   |
| 222630_PM_at    | RFX7      | regulatory factor X, 7                                               | 0.00078 | 1.33  | Normal up vs Off IS Tolerant   |

|                 |                 |                                                                                         |         |       |                                |
|-----------------|-----------------|-----------------------------------------------------------------------------------------|---------|-------|--------------------------------|
| 209768_PM_s_at  | GP1BB /// SEPT5 | glycoprotein Ib (platelet), beta polypeptide /// septin 5                               | 0.00079 | -1.49 | Normal down vs Off IS Tolerant |
| 228849_PM_at    | NTRK3           | neurotrophic tyrosine kinase, receptor, type 3                                          | 0.00079 | -1.60 | Normal down vs Off IS Tolerant |
| 206518_PM_s_at  | RGS9            | regulator of G-protein signaling 9                                                      | 0.00079 | 1.30  | Normal up vs Off IS Tolerant   |
| 211175_PM_at    | GPR45           | G protein-coupled receptor 45                                                           | 0.00079 | -1.24 | Normal down vs Off IS Tolerant |
| 218278_PM_at    | WDR74           | WD repeat domain 74                                                                     | 0.00079 | 1.33  | Normal up vs Off IS Tolerant   |
| 41660_PM_at     | CELSR1          | cadherin, EGF LAG seven-pass G-type receptor 1 (flamingo homolog, Drosophila)           | 0.00080 | 1.52  | Normal up vs Off IS Tolerant   |
| 213655_PM_at    | YWHAE           | Tyrosine 3-monooxygenase/tryptophan 5-monooxygenase activation protein, epsilon polypep | 0.00080 | -1.49 | Normal down vs Off IS Tolerant |
| 234881_PM_at    | ---             | ---                                                                                     | 0.00080 | -1.35 | Normal down vs Off IS Tolerant |
| 213795_PM_s_at  | PTPRA           | protein tyrosine phosphatase, receptor type, A                                          | 0.00080 | 1.38  | Normal up vs Off IS Tolerant   |
| 215203_PM_at    | GOLGA4          | golgin A4                                                                               | 0.00080 | 2.05  | Normal up vs Off IS Tolerant   |
| 1569527_PM_at   | ---             | ---                                                                                     | 0.00080 | 1.85  | Normal up vs Off IS Tolerant   |
| 237695_PM_at    | ---             | ---                                                                                     | 0.00080 | -1.49 | Normal down vs Off IS Tolerant |
| 235987_PM_at    | PRKXP1          | protein kinase, X-linked, pseudogene 1                                                  | 0.00080 | 2.27  | Normal up vs Off IS Tolerant   |
| 227345_PM_at    | TNFRSF10D       | tumor necrosis factor receptor superfamily, member 10d, decoy with truncated death doma | 0.00080 | 1.73  | Normal up vs Off IS Tolerant   |
| 1557067_PM_s_at | LUC7L           | LUC7-like ( <i>S. cerevisiae</i> )                                                      | 0.00080 | 1.85  | Normal up vs Off IS Tolerant   |
| 226718_PM_at    | AMIGO1          | adhesion molecule with Ig-like domain 1                                                 | 0.00081 | 1.83  | Normal up vs Off IS Tolerant   |
| 202934_PM_at    | HK2             | hexokinase 2                                                                            | 0.00081 | -1.68 | Normal down vs Off IS Tolerant |
| 242114_PM_at    | LOC440354       | PI-3-kinase-related kinase SMG-1 pseudogene                                             | 0.00081 | -1.65 | Normal down vs Off IS Tolerant |
| 233959_PM_at    | LOC221442       | adenylate cyclase 10 pseudogene                                                         | 0.00081 | 1.41  | Normal up vs Off IS Tolerant   |

|                 |              |                                                                                         |         |       |                                |
|-----------------|--------------|-----------------------------------------------------------------------------------------|---------|-------|--------------------------------|
| 218754_PM_at    | NOL9         | nucleolar protein 9                                                                     | 0.00081 | 1.38  | Normal up vs Off IS Tolerant   |
| 231280_PM_at    | ---          | ---                                                                                     | 0.00081 | -1.29 | Normal down vs Off IS Tolerant |
| 220803_PM_at    | STAMBPL1     | STAM binding protein-like 1                                                             | 0.00081 | 1.35  | Normal up vs Off IS Tolerant   |
| 200642_PM_at    | SOD1         | superoxide dismutase 1, soluble                                                         | 0.00081 | 1.32  | Normal up vs Off IS Tolerant   |
| 215873_PM_x_at  | ABCC10       | ATP-binding cassette, sub-family C (CFTR/MRP), member 10                                | 0.00082 | 1.45  | Normal up vs Off IS Tolerant   |
| 214790_PM_at    | SENP6        | SUMO1/sentrin specific peptidase 6                                                      | 0.00082 | 1.72  | Normal up vs Off IS Tolerant   |
| 236102_PM_at    | LOC100126784 | Hypothetical LOC100126784                                                               | 0.00082 | -1.25 | Normal down vs Off IS Tolerant |
| 243029_PM_at    | KREMEN1      | kringle containing transmembrane protein 1                                              | 0.00082 | -1.43 | Normal down vs Off IS Tolerant |
| 213335_PM_s_at  | ST3GAL6      | ST3 beta-galactoside alpha-2,3-sialyltransferase 6                                      | 0.00082 | -1.34 | Normal down vs Off IS Tolerant |
| 219342_PM_at    | CASD1        | CAS1 domain containing 1                                                                | 0.00082 | 1.56  | Normal up vs Off IS Tolerant   |
| 214833_PM_at    | TMEM63A      | transmembrane protein 63A                                                               | 0.00082 | 1.90  | Normal up vs Off IS Tolerant   |
| 213245_PM_at    | ADCY1        | adenylate cyclase 1 (brain)                                                             | 0.00082 | -1.25 | Normal down vs Off IS Tolerant |
| 201225_PM_s_at  | SRRM1        | serine/arginine repetitive matrix 1                                                     | 0.00082 | 1.13  | Normal up vs Off IS Tolerant   |
| 213030_PM_s_at  | PLXNA2       | plexin A2                                                                               | 0.00082 | -1.27 | Normal down vs Off IS Tolerant |
| 234100_PM_at    | ---          | ---                                                                                     | 0.00082 | -1.88 | Normal down vs Off IS Tolerant |
| 223255_PM_at    | G2E3         | G2/M-phase specific E3 ubiquitin protein ligase                                         | 0.00082 | 1.49  | Normal up vs Off IS Tolerant   |
| 243315_PM_at    | ---          | ---                                                                                     | 0.00082 | 1.70  | Normal up vs Off IS Tolerant   |
| 228045_PM_at    | ---          | ---                                                                                     | 0.00082 | 1.92  | Normal up vs Off IS Tolerant   |
| 201463_PM_s_at  | TALDO1       | transaldolase 1                                                                         | 0.00082 | -1.34 | Normal down vs Off IS Tolerant |
| 221607_PM_x_at  | ACTG1        | actin, gamma 1                                                                          | 0.00082 | -1.12 | Normal down vs Off IS Tolerant |
| 1554240_PM_a_at | ITGAL        | integrin, alpha L (antigen CD11A (p180), lymphocyte function-associated antigen 1; alph | 0.00082 | 1.33  | Normal up vs Off IS Tolerant   |

|                 |                              |                                                                  |         |       |                                |
|-----------------|------------------------------|------------------------------------------------------------------|---------|-------|--------------------------------|
| 224953_PM_at    | YIPF5                        | Yip1 domain family, member 5                                     | 0.00083 | -1.68 | Normal down vs Off IS Tolerant |
| 208540_PM_x_at  | S100A11                      | S100 calcium binding protein A11                                 | 0.00083 | -1.47 | Normal down vs Off IS Tolerant |
| 218687_PM_s_at  | MUC13                        | mucin 13, cell surface associated                                | 0.00083 | -1.26 | Normal down vs Off IS Tolerant |
| 243757_PM_at    | ---                          | ---                                                              | 0.00083 | 1.77  | Normal up vs Off IS Tolerant   |
| 213500_PM_at    | ---                          | ---                                                              | 0.00083 | -1.51 | Normal down vs Off IS Tolerant |
| 37652_PM_at     | CABIN1                       | calcineurin binding protein 1                                    | 0.00083 | 1.30  | Normal up vs Off IS Tolerant   |
| 204156_PM_at    | SIK3                         | SIK family kinase 3                                              | 0.00083 | 1.66  | Normal up vs Off IS Tolerant   |
| 217716_PM_s_at  | SEC61A1                      | Sec61 alpha 1 subunit ( <i>S. cerevisiae</i> )                   | 0.00083 | -1.25 | Normal down vs Off IS Tolerant |
| 1557073_PM_s_at | TTBK2                        | Tau tubulin kinase 2                                             | 0.00084 | 1.56  | Normal up vs Off IS Tolerant   |
| 1559144_PM_x_at | LOC100130581                 | hypothetical LOC100130581                                        | 0.00084 | -1.27 | Normal down vs Off IS Tolerant |
| 226776_PM_at    | ENY2                         | enhancer of yellow 2 homolog<br>( <i>Drosophila</i> )            | 0.00084 | 1.72  | Normal up vs Off IS Tolerant   |
| 201743_PM_at    | CD14                         | CD14 molecule                                                    | 0.00084 | -1.47 | Normal down vs Off IS Tolerant |
| 217641_PM_at    | GPR135                       | G protein-coupled receptor 135                                   | 0.00084 | -1.31 | Normal down vs Off IS Tolerant |
| 234295_PM_at    | DBR1                         | debranching enzyme homolog 1 ( <i>S. cerevisiae</i> )            | 0.00084 | 1.68  | Normal up vs Off IS Tolerant   |
| 204092_PM_s_at  | AURKA                        | aurora kinase A                                                  | 0.00084 | -1.35 | Normal down vs Off IS Tolerant |
| 213959_PM_s_at  | RPGRIP1L                     | RPGRIP1-like                                                     | 0.00084 | -1.25 | Normal down vs Off IS Tolerant |
| 227970_PM_at    | GPR157                       | G protein-coupled receptor 157                                   | 0.00084 | 1.47  | Normal up vs Off IS Tolerant   |
| 37117_PM_at     | ARHGAP8 /// PRR5-<br>ARHGAP8 | Rho GTPase activating protein 8 /// PRR5-<br>ARHGAP8 readthrough | 0.00084 | 1.41  | Normal up vs Off IS Tolerant   |
| 221483_PM_s_at  | ARPP19                       | cAMP-regulated phosphoprotein, 19kDa                             | 0.00085 | 1.21  | Normal up vs Off IS Tolerant   |
| 233850_PM_s_at  | EBF4                         | early B-cell factor 4                                            | 0.00085 | 1.28  | Normal up vs Off IS Tolerant   |



|                |          |                                                               |         |       |                                |
|----------------|----------|---------------------------------------------------------------|---------|-------|--------------------------------|
| 227485_PM_at   | DDX26B   | DEAD/H (Asp-Glu-Ala-Asp/His) box polypeptide 26B              | 0.00085 | 1.52  | Normal up vs Off IS Tolerant   |
| 226340_PM_x_at | WASH3P   | WAS protein family homolog 3 pseudogene                       | 0.00085 | 1.36  | Normal up vs Off IS Tolerant   |
| 227517_PM_s_at | GAS5     | growth arrest-specific 5 (non-protein coding)                 | 0.00085 | 1.53  | Normal up vs Off IS Tolerant   |
| 212549_PM_at   | STAT5B   | signal transducer and activator of transcription 5B           | 0.00085 | 1.30  | Normal up vs Off IS Tolerant   |
| 1552623_PM_at  | HSH2D    | hematopoietic SH2 domain containing                           | 0.00085 | 1.73  | Normal up vs Off IS Tolerant   |
| 242598_PM_at   | ---      | ---                                                           | 0.00085 | -2.00 | Normal down vs Off IS Tolerant |
| 204646_PM_at   | DPYD     | dihydropyrimidine dehydrogenase                               | 0.00085 | -1.43 | Normal down vs Off IS Tolerant |
| 239666_PM_at   | PYGO2    | Pygopus homolog 2 (Drosophila)                                | 0.00085 | -1.34 | Normal down vs Off IS Tolerant |
| 223730_PM_at   | GPC6     | glypican 6                                                    | 0.00086 | -1.50 | Normal down vs Off IS Tolerant |
| 210653_PM_s_at | BCKDHB   | branched chain keto acid dehydrogenase E1, beta polypeptide   | 0.00086 | 1.68  | Normal up vs Off IS Tolerant   |
| 231373_PM_at   | RNF133   | ring finger protein 133                                       | 0.00086 | -1.57 | Normal down vs Off IS Tolerant |
| 222310_PM_at   | SFRS15   | splicing factor, arginine/serine-rich 15                      | 0.00086 | 1.51  | Normal up vs Off IS Tolerant   |
| 238142_PM_at   | ---      | ---                                                           | 0.00086 | 1.61  | Normal up vs Off IS Tolerant   |
| 240234_PM_at   | ---      | ---                                                           | 0.00086 | 1.47  | Normal up vs Off IS Tolerant   |
| 210203_PM_at   | CNOT4    | CCR4-NOT transcription complex, subunit 4                     | 0.00087 | 1.70  | Normal up vs Off IS Tolerant   |
| 224517_PM_at   | POLR2J4  | polymerase (RNA) II (DNA directed) polypeptide J4, pseudogene | 0.00087 | 1.70  | Normal up vs Off IS Tolerant   |
| 202588_PM_at   | AK1      | adenylate kinase 1                                            | 0.00087 | 1.44  | Normal up vs Off IS Tolerant   |
| 230281_PM_at   | C16orf46 | chromosome 16 open reading frame 46                           | 0.00087 | -1.41 | Normal down vs Off IS Tolerant |
| 226065_PM_at   | PRICKLE1 | prickle homolog 1 (Drosophila)                                | 0.00087 | -1.94 | Normal down vs Off IS Tolerant |
| 211168_PM_s_at | UPF1     | UPF1 regulator of nonsense transcripts homolog (yeast)        | 0.00087 | 1.32  | Normal up vs Off IS Tolerant   |

|                |                       |                                                                     |         |       |                                |
|----------------|-----------------------|---------------------------------------------------------------------|---------|-------|--------------------------------|
| 227790_PM_at   | UBE2CBP               | ubiquitin-conjugating enzyme E2C binding protein                    | 0.00087 | 1.32  | Normal up vs Off IS Tolerant   |
| 227443_PM_at   | C9orf150              | chromosome 9 open reading frame 150                                 | 0.00087 | -1.75 | Normal down vs Off IS Tolerant |
| 1552528_PM_at  | C21orf67              | chromosome 21 open reading frame 67                                 | 0.00087 | -1.25 | Normal down vs Off IS Tolerant |
| 236267_PM_at   | ZNF346                | zinc finger protein 346                                             | 0.00088 | 1.54  | Normal up vs Off IS Tolerant   |
| 202164_PM_s_at | CNOT8                 | CCR4-NOT transcription complex, subunit 8                           | 0.00088 | 1.35  | Normal up vs Off IS Tolerant   |
| 212789_PM_at   | NCAPD3                | non-SMC condensin II complex, subunit D3                            | 0.00088 | 1.47  | Normal up vs Off IS Tolerant   |
| 212334_PM_at   | GNS                   | glucosamine (N-acetyl)-6-sulfatase                                  | 0.00088 | -1.32 | Normal down vs Off IS Tolerant |
| 205514_PM_at   | ZNF415                | zinc finger protein 415                                             | 0.00088 | 1.29  | Normal up vs Off IS Tolerant   |
| 235448_PM_at   | ZXDC                  | ZXD family zinc finger C                                            | 0.00088 | 1.45  | Normal up vs Off IS Tolerant   |
| 203543_PM_s_at | KLF9                  | Kruppel-like factor 9                                               | 0.00088 | 2.17  | Normal up vs Off IS Tolerant   |
| 235974_PM_at   | ---                   | ---                                                                 | 0.00088 | 1.61  | Normal up vs Off IS Tolerant   |
| 242129_PM_at   | SIN3B                 | SIN3 homolog B, transcription regulator (yeast)                     | 0.00088 | -1.27 | Normal down vs Off IS Tolerant |
| 237056_PM_at   | INSC                  | inscuteable homolog (Drosophila)                                    | 0.00088 | -1.53 | Normal down vs Off IS Tolerant |
| 230102_PM_at   | ETV5                  | Ets variant 5                                                       | 0.00088 | -1.44 | Normal down vs Off IS Tolerant |
| 204283_PM_at   | FARS2                 | phenylalanyl-tRNA synthetase 2, mitochondrial                       | 0.00089 | 1.95  | Normal up vs Off IS Tolerant   |
| 1560767_PM_at  | HCG22                 | HLA complex group 22                                                | 0.00089 | -1.39 | Normal down vs Off IS Tolerant |
| 228544_PM_s_at | CSRP2BP ///<br>PET117 | CSRP2 binding protein /// cytochrome c oxidase assembly factor-like | 0.00089 | 1.55  | Normal up vs Off IS Tolerant   |
| 209297_PM_at   | ITSN1                 | intersectin 1 (SH3 domain protein)                                  | 0.00089 | -1.50 | Normal down vs Off IS Tolerant |
| 226527_PM_at   | RPRD2                 | regulation of nuclear pre-mRNA domain containing 2                  | 0.00089 | 1.59  | Normal up vs Off IS Tolerant   |
| 227682_PM_at   | ---                   | ---                                                                 | 0.00089 | 1.74  | Normal up vs Off IS Tolerant   |

|                 |            |                                                              |         |       |                                |
|-----------------|------------|--------------------------------------------------------------|---------|-------|--------------------------------|
| 227988_PM_s_at  | VPS13A     | vacuolar protein sorting 13 homolog A (S. cerevisiae)        | 0.00090 | 1.86  | Normal up vs Off IS Tolerant   |
| 235126_PM_at    | NCRNA00292 | non-protein coding RNA 292                                   | 0.00090 | -2.03 | Normal down vs Off IS Tolerant |
| 225550_PM_at    | CNST       | consortin, connexin sorting protein                          | 0.00090 | 1.77  | Normal up vs Off IS Tolerant   |
| 224308_PM_s_at  | INTS2      | integrator complex subunit 2                                 | 0.00090 | 1.55  | Normal up vs Off IS Tolerant   |
| 209417_PM_s_at  | IFI35      | interferon-induced protein 35                                | 0.00090 | -1.53 | Normal down vs Off IS Tolerant |
| 220748_PM_s_at  | ZNF580     | zinc finger protein 580                                      | 0.00090 | 1.49  | Normal up vs Off IS Tolerant   |
| 233726_PM_at    | ---        | ---                                                          | 0.00090 | -1.26 | Normal down vs Off IS Tolerant |
| 235429_PM_at    | ---        | ---                                                          | 0.00090 | 1.56  | Normal up vs Off IS Tolerant   |
| 203452_PM_at    | B3GAT3     | beta-1,3-glucuronyltransferase 3 (glucuronosyltransferase I) | 0.00090 | 1.37  | Normal up vs Off IS Tolerant   |
| 242002_PM_at    | NKAIN2     | Na+/K+ transporting ATPase interacting 2                     | 0.00090 | -1.50 | Normal down vs Off IS Tolerant |
| 238405_PM_at    | ---        | ---                                                          | 0.00090 | -1.31 | Normal down vs Off IS Tolerant |
| 1559995_PM_at   | SAMD14     | Sterile alpha motif domain containing 14                     | 0.00090 | -1.43 | Normal down vs Off IS Tolerant |
| 1560648_PM_s_at | TSPYL1     | TSPY-like 1                                                  | 0.00090 | 1.42  | Normal up vs Off IS Tolerant   |
| 231847_PM_at    | ANKRD54    | ankyrin repeat domain 54                                     | 0.00090 | 1.48  | Normal up vs Off IS Tolerant   |
| 233079_PM_at    | ---        | ---                                                          | 0.00090 | -1.29 | Normal down vs Off IS Tolerant |
| 240184_PM_at    | ---        | ---                                                          | 0.00090 | -1.61 | Normal down vs Off IS Tolerant |
| 1561251_PM_at   | LOC285577  | hypothetical LOC285577                                       | 0.00091 | -1.30 | Normal down vs Off IS Tolerant |
| 233400_PM_at    | ---        | ---                                                          | 0.00091 | 1.76  | Normal up vs Off IS Tolerant   |
| 218579_PM_s_at  | DHX35      | DEAH (Asp-Glu-Ala-His) box polypeptide 35                    | 0.00091 | 1.29  | Normal up vs Off IS Tolerant   |
| 227178_PM_at    | CELF2      | CUGBP, Elav-like family member 2                             | 0.00091 | 1.35  | Normal up vs Off IS Tolerant   |
| 227615_PM_at    | ---        | ---                                                          | 0.00091 | 1.62  | Normal up vs Off IS Tolerant   |
| 210971_PM_s_at  | ARNTL      | aryl hydrocarbon receptor nuclear translocator-like          | 0.00091 | 1.84  | Normal up vs Off IS Tolerant   |

|                |                  |                                                                                         |         |       |                                |
|----------------|------------------|-----------------------------------------------------------------------------------------|---------|-------|--------------------------------|
| 201895_PM_at   | ARAF             | v-raf murine sarcoma 3611 viral oncogene homolog                                        | 0.00091 | 1.31  | Normal up vs Off IS Tolerant   |
| 226369_PM_at   | LOC338799        | hypothetical LOC338799                                                                  | 0.00091 | 1.58  | Normal up vs Off IS Tolerant   |
| 242010_PM_at   | LOC728475        | Hypothetical LOC728475                                                                  | 0.00092 | -1.28 | Normal down vs Off IS Tolerant |
| 223072_PM_s_at | INO80B /// WBP1  | INO80 complex subunit B /// WW domain binding protein 1                                 | 0.00092 | 1.44  | Normal up vs Off IS Tolerant   |
| 212591_PM_at   | ARID4B /// RBM34 | AT rich interactive domain 4B (RBP1-like) /// RNA binding motif protein 34              | 0.00092 | 1.26  | Normal up vs Off IS Tolerant   |
| 219349_PM_s_at | EXOC2            | exocyst complex component 2                                                             | 0.00093 | 1.65  | Normal up vs Off IS Tolerant   |
| 240697_PM_at   | ---              | ---                                                                                     | 0.00093 | -1.32 | Normal down vs Off IS Tolerant |
| 230141_PM_at   | ARID4A           | AT rich interactive domain 4A (RBP1-like)                                               | 0.00093 | 1.65  | Normal up vs Off IS Tolerant   |
| 204659_PM_s_at | GFER             | growth factor, augments liver regeneration                                              | 0.00093 | 1.51  | Normal up vs Off IS Tolerant   |
| 238604_PM_at   | ---              | ---                                                                                     | 0.00093 | 1.45  | Normal up vs Off IS Tolerant   |
| 209961_PM_s_at | HGF              | hepatocyte growth factor (hepatopoietin A; scatter factor)                              | 0.00093 | -1.39 | Normal down vs Off IS Tolerant |
| 214125_PM_s_at | NENF             | Neuron derived neurotrophic factor                                                      | 0.00093 | -1.30 | Normal down vs Off IS Tolerant |
| 200639_PM_s_at | YWHAZ            | tyrosine 3-monooxygenase/tryptophan 5-monooxygenase activation protein, zeta polypeptid | 0.00093 | 1.19  | Normal up vs Off IS Tolerant   |
| 200867_PM_at   | RNF114           | ring finger protein 114                                                                 | 0.00093 | 1.40  | Normal up vs Off IS Tolerant   |
| 201831_PM_s_at | USO1             | USO1 vesicle docking protein homolog (yeast)                                            | 0.00094 | -1.68 | Normal down vs Off IS Tolerant |
| 219548_PM_at   | ZNF16            | zinc finger protein 16                                                                  | 0.00094 | 1.39  | Normal up vs Off IS Tolerant   |
| 230741_PM_at   | ---              | ---                                                                                     | 0.00094 | -1.53 | Normal down vs Off IS Tolerant |
| 243745_PM_at   | ---              | ---                                                                                     | 0.00094 | -1.76 | Normal down vs Off IS Tolerant |
| 218890_PM_x_at | MRPL35           | mitochondrial ribosomal protein L35                                                     | 0.00094 | -1.37 | Normal down vs Off IS Tolerant |

|                 |              |                                                                                                 |         |       |                                |
|-----------------|--------------|-------------------------------------------------------------------------------------------------|---------|-------|--------------------------------|
| 1570505_PM_at   | ABCB4        | ATP-binding cassette, sub-family B (MDR/TAP), member 4                                          | 0.00094 | -1.91 | Normal down vs Off IS Tolerant |
| 212577_PM_at    | SMCHD1       | structural maintenance of chromosomes flexible hinge domain containing 1                        | 0.00094 | 1.40  | Normal up vs Off IS Tolerant   |
| 219996_PM_at    | ASB7         | ankyrin repeat and SOCS box-containing 7                                                        | 0.00094 | 1.41  | Normal up vs Off IS Tolerant   |
| 222080_PM_s_at  | SIRT5        | Sirtuin (silent mating type information regulation 2 homolog) 5 ( <i>S. cerevisiae</i> )        | 0.00094 | -1.32 | Normal down vs Off IS Tolerant |
| 244743_PM_x_at  | ZNF138       | zinc finger protein 138                                                                         | 0.00094 | 1.49  | Normal up vs Off IS Tolerant   |
| 204732_PM_s_at  | TRIM23       | tripartite motif-containing 23                                                                  | 0.00095 | 1.60  | Normal up vs Off IS Tolerant   |
| 1568646_PM_x_at | ZNF208       | zinc finger protein 208                                                                         | 0.00095 | -1.78 | Normal down vs Off IS Tolerant |
| 235461_PM_at    | TET2         | tet oncogene family member 2                                                                    | 0.00095 | -1.86 | Normal down vs Off IS Tolerant |
| 225992_PM_at    | MLLT10       | myeloid/lymphoid or mixed-lineage leukemia (trithorax homolog, <i>Drosophila</i> ); translocate | 0.00095 | 1.30  | Normal up vs Off IS Tolerant   |
| 235782_PM_at    | ---          | ---                                                                                             | 0.00095 | 1.79  | Normal up vs Off IS Tolerant   |
| 218674_PM_at    | C5orf44      | chromosome 5 open reading frame 44                                                              | 0.00095 | 1.84  | Normal up vs Off IS Tolerant   |
| 1554418_PM_s_at | SPOCK3       | sparc/osteonectin, cwcv and kazal-like domains proteoglycan (testican) 3                        | 0.00095 | -1.92 | Normal down vs Off IS Tolerant |
| 206881_PM_s_at  | LILRA3       | leukocyte immunoglobulin-like receptor, subfamily A (without TM domain), member 3               | 0.00095 | -2.62 | Normal down vs Off IS Tolerant |
| 209028_PM_s_at  | ABI1         | abl-interactor 1                                                                                | 0.00095 | 1.24  | Normal up vs Off IS Tolerant   |
| 215026_PM_x_at  | SCNN1A       | sodium channel, nonvoltage-gated 1 alpha                                                        | 0.00095 | -1.44 | Normal down vs Off IS Tolerant |
| 234738_PM_s_at  | LOC100129637 | hypothetical LOC100129637                                                                       | 0.00095 | 1.84  | Normal up vs Off IS Tolerant   |
| 241825_PM_at    | C2orf60      | chromosome 2 open reading frame 60                                                              | 0.00095 | 1.38  | Normal up vs Off IS Tolerant   |
| 224321_PM_at    | TMEFF2       | transmembrane protein with EGF-like and two follistatin-like domains 2                          | 0.00095 | -2.87 | Normal down vs Off IS Tolerant |
| 239325_PM_at    | LOC729723    | hypothetical LOC729723                                                                          | 0.00095 | -1.26 | Normal down vs Off IS Tolerant |

|                 |          |                                                                              |         |       |                                |
|-----------------|----------|------------------------------------------------------------------------------|---------|-------|--------------------------------|
| 1560014_PM_s_at | PDXDC1   | pyridoxal-dependent decarboxylase domain containing 1                        | 0.00095 | 1.84  | Normal up vs Off IS Tolerant   |
| 223771_PM_at    | TMEM87A  | Transmembrane protein 87A                                                    | 0.00096 | 1.75  | Normal up vs Off IS Tolerant   |
| 209152_PM_s_at  | TCF3     | transcription factor 3 (E2A immunoglobulin enhancer binding factors E12/E47) | 0.00096 | 1.63  | Normal up vs Off IS Tolerant   |
| 1566955_PM_at   | ---      | ---                                                                          | 0.00096 | -1.26 | Normal down vs Off IS Tolerant |
| 1555350_PM_at   | PPHLN1   | periphilin 1                                                                 | 0.00096 | 1.31  | Normal up vs Off IS Tolerant   |
| 234232_PM_at    | ---      | ---                                                                          | 0.00096 | -1.40 | Normal down vs Off IS Tolerant |
| 218289_PM_s_at  | UBA5     | ubiquitin-like modifier activating enzyme 5                                  | 0.00096 | 1.72  | Normal up vs Off IS Tolerant   |
| 223644_PM_s_at  | CRYGS    | crystallin, gamma S                                                          | 0.00096 | 1.61  | Normal up vs Off IS Tolerant   |
| 204618_PM_s_at  | GABPB1   | GA binding protein transcription factor, beta subunit 1                      | 0.00096 | 1.47  | Normal up vs Off IS Tolerant   |
| 1556469_PM_s_at | ---      | ---                                                                          | 0.00096 | -1.26 | Normal down vs Off IS Tolerant |
| 1565811_PM_at   | ---      | ---                                                                          | 0.00096 | -1.52 | Normal down vs Off IS Tolerant |
| 234997_PM_x_at  | ---      | ---                                                                          | 0.00097 | 1.55  | Normal up vs Off IS Tolerant   |
| 237735_PM_at    | ---      | ---                                                                          | 0.00097 | -1.25 | Normal down vs Off IS Tolerant |
| 203341_PM_at    | CEBPZ    | CCAAT/enhancer binding protein (C/EBP), zeta                                 | 0.00097 | 1.41  | Normal up vs Off IS Tolerant   |
| 227789_PM_at    | MRS2     | MRS2 magnesium homeostasis factor homolog ( <i>S. cerevisiae</i> )           | 0.00097 | 1.29  | Normal up vs Off IS Tolerant   |
| 205047_PM_s_at  | ASNS     | asparagine synthetase (glutamine-hydrolyzing)                                | 0.00097 | 1.69  | Normal up vs Off IS Tolerant   |
| 1556803_PM_at   | POLR3B   | polymerase (RNA) III (DNA directed) polypeptide B                            | 0.00097 | -1.27 | Normal down vs Off IS Tolerant |
| 236132_PM_at    | TLN1     | talin 1                                                                      | 0.00097 | 1.93  | Normal up vs Off IS Tolerant   |
| 224712_PM_x_at  | C19orf42 | chromosome 19 open reading frame 42                                          | 0.00097 | 1.44  | Normal up vs Off IS Tolerant   |

|                 |                 |                                                                                |         |       |                                |
|-----------------|-----------------|--------------------------------------------------------------------------------|---------|-------|--------------------------------|
| 237351_PM_at    | ---             | ---                                                                            | 0.00097 | -1.29 | Normal down vs Off IS Tolerant |
| 224561_PM_s_at  | MORF4L1         | mortality factor 4 like 1                                                      | 0.00098 | 1.25  | Normal up vs Off IS Tolerant   |
| 206501_PM_x_at  | ETV1            | ets variant 1                                                                  | 0.00098 | -2.14 | Normal down vs Off IS Tolerant |
| 227319_PM_at    | KLHL36          | kelch-like 36 (Drosophila)                                                     | 0.00098 | 1.53  | Normal up vs Off IS Tolerant   |
| 1555801_PM_s_at | ZNF385B         | zinc finger protein 385B                                                       | 0.00098 | -1.29 | Normal down vs Off IS Tolerant |
| 230452_PM_at    | FLJ42351        | hypothetical LOC400999                                                         | 0.00098 | 1.50  | Normal up vs Off IS Tolerant   |
| 221535_PM_at    | LSG1            | large subunit GTPase 1 homolog (S. cerevisiae)                                 | 0.00098 | 1.54  | Normal up vs Off IS Tolerant   |
| 238760_PM_at    | YARS            | tyrosyl-tRNA synthetase                                                        | 0.00098 | 1.44  | Normal up vs Off IS Tolerant   |
| 223113_PM_at    | TMEM138         | transmembrane protein 138                                                      | 0.00099 | 1.23  | Normal up vs Off IS Tolerant   |
| 1555408_PM_at   | BAGE2 /// BAGE4 | B melanoma antigen family, member 2<br>/// B melanoma antigen family, member 4 | 0.00099 | -1.54 | Normal down vs Off IS Tolerant |
| 242428_PM_at    | DCUN1D1         | DCN1, defective in cullin neddylation 1, domain containing 1 (S. cerevisiae)   | 0.00099 | 1.67  | Normal up vs Off IS Tolerant   |
| 225356_PM_at    | ---             | ---                                                                            | 0.00099 | 1.19  | Normal up vs Off IS Tolerant   |
| 240327_PM_at    | ---             | ---                                                                            | 0.00099 | 1.51  | Normal up vs Off IS Tolerant   |
| 235450_PM_at    | FBXL4           | F-box and leucine-rich repeat protein 4                                        | 0.00100 | 1.73  | Normal up vs Off IS Tolerant   |
| 239038_PM_at    | C1orf52         | chromosome 1 open reading frame 52                                             | 0.00100 | 1.49  | Normal up vs Off IS Tolerant   |
| 204057_PM_at    | IRF8            | interferon regulatory factor 8                                                 | 0.00100 | -1.23 | Normal down vs Off IS Tolerant |
| 240454_PM_at    | ---             | ---                                                                            | 0.00100 | -1.29 | Normal down vs Off IS Tolerant |
| 209030_PM_s_at  | CADM1           | cell adhesion molecule 1                                                       | 0.00100 | 1.55  | Normal up vs Off IS Tolerant   |
| 1558438_PM_a_at | IGHA1           | Immunoglobulin heavy constant alpha 1                                          | 0.00100 | 1.39  | Normal up vs Off IS Tolerant   |
| 1566833_PM_x_at | TOP1P2          | topoisomerase (DNA) I pseudogene 2                                             | 0.00100 | -1.23 | Normal down vs Off IS Tolerant |
| 223494_PM_at    | MGEA5           | meningioma expressed antigen 5 (hyaluronidase)                                 | 0.00100 | 1.36  | Normal up vs Off IS Tolerant   |
| 1554470_PM_s_at | ZBTB44          | zinc finger and BTB domain containing 44                                       | 0.00100 | 1.48  | Normal up vs Off IS Tolerant   |

|                 |                                             |                                                                                          |         |       |                                |
|-----------------|---------------------------------------------|------------------------------------------------------------------------------------------|---------|-------|--------------------------------|
| 1554697_PM_at   | ADAMTS9                                     | ADAM metalloproteinase with thrombospondin type 1 motif, 9                               | 0.00101 | -1.29 | Normal down vs Off IS Tolerant |
| 1557348_PM_at   | ---                                         | ---                                                                                      | 0.00101 | -1.89 | Normal down vs Off IS Tolerant |
| 200975_PM_at    | PPT1                                        | palmitoyl-protein thioesterase 1                                                         | 0.00101 | -1.37 | Normal down vs Off IS Tolerant |
| 242247_PM_at    | METT5D1                                     | methyltransferase 5 domain containing 1                                                  | 0.00101 | 1.28  | Normal up vs Off IS Tolerant   |
| 212628_PM_at    | PKN2                                        | protein kinase N2                                                                        | 0.00101 | 1.39  | Normal up vs Off IS Tolerant   |
| 1561190_PM_at   | CDKL3                                       | cyclin-dependent kinase-like 3                                                           | 0.00101 | 1.41  | Normal up vs Off IS Tolerant   |
| 229595_PM_at    | CHCHD4                                      | coiled-coil-helix-coiled-coil-helix domain containing 4                                  | 0.00101 | -1.47 | Normal down vs Off IS Tolerant |
| 228817_PM_at    | ALG9                                        | asparagine-linked glycosylation 9, alpha-1,2-mannosyltransferase homolog (S. cerevisiae) | 0.00101 | 1.48  | Normal up vs Off IS Tolerant   |
| 1569040_PM_s_at | ANKRD36BP2                                  | ankyrin repeat domain 36B pseudogene 2                                                   | 0.00101 | 1.85  | Normal up vs Off IS Tolerant   |
| 240581_PM_at    | ---                                         | ---                                                                                      | 0.00102 | 1.24  | Normal up vs Off IS Tolerant   |
| 207256_PM_at    | MBL2                                        | mannose-binding lectin (protein C) 2, soluble (opsonic defect)                           | 0.00102 | -1.44 | Normal down vs Off IS Tolerant |
| 212273_PM_x_at  | GNAS                                        | GNAS complex locus                                                                       | 0.00102 | 1.20  | Normal up vs Off IS Tolerant   |
| 204764_PM_at    | FNTB                                        | farnesyltransferase, CAAX box, beta                                                      | 0.00102 | 1.40  | Normal up vs Off IS Tolerant   |
| 209810_PM_at    | SFTPB                                       | surfactant protein B                                                                     | 0.00102 | -1.24 | Normal down vs Off IS Tolerant |
| 41512_PM_at     | BRAP                                        | BRCA1 associated protein                                                                 | 0.00102 | 1.52  | Normal up vs Off IS Tolerant   |
| 244724_PM_at    | ---                                         | ---                                                                                      | 0.00102 | -1.32 | Normal down vs Off IS Tolerant |
| 239359_PM_at    | 11-Mar                                      | membrane-associated ring finger (C3HC4) 11                                               | 0.00103 | -1.34 | Normal down vs Off IS Tolerant |
| 241389_PM_at    | CHRN2                                       | cholinergic receptor, nicotinic, beta 2 (neuronal)                                       | 0.00103 | -1.40 | Normal down vs Off IS Tolerant |
| 1556102_PM_x_at | LOC389906 ///<br>LOC441528 ///<br>LOC729162 | hypothetical LOC389906 /// hypothetical LOC441528 /// hypothetical protein LOC729162     | 0.00103 | 1.51  | Normal up vs Off IS Tolerant   |



|                 |           |                                                          |         |       |                                |
|-----------------|-----------|----------------------------------------------------------|---------|-------|--------------------------------|
| 46256_PM_at     | SPSB3     | splA/ryanodine receptor domain and SOCS box containing 3 | 0.00103 | 1.24  | Normal up vs Off IS Tolerant   |
| 233894_PM_x_at  | EMID2     | EMI domain containing 2                                  | 0.00103 | -1.34 | Normal down vs Off IS Tolerant |
| 1554110_PM_at   | CDCP1     | CUB domain containing protein 1                          | 0.00103 | -1.37 | Normal down vs Off IS Tolerant |
| 1557875_PM_at   | ---       | ---                                                      | 0.00103 | -1.41 | Normal down vs Off IS Tolerant |
| 214698_PM_at    | ROD1      | ROD1 regulator of differentiation 1 (S. pombe)           | 0.00103 | -1.28 | Normal down vs Off IS Tolerant |
| 205955_PM_at    | ---       | ---                                                      | 0.00103 | 1.41  | Normal up vs Off IS Tolerant   |
| 224585_PM_x_at  | ACTG1     | actin, gamma 1                                           | 0.00103 | -1.12 | Normal down vs Off IS Tolerant |
| 1557865_PM_at   | ---       | ---                                                      | 0.00103 | -1.38 | Normal down vs Off IS Tolerant |
| 229323_PM_at    | LOC387723 | hypothetical LOC387723                                   | 0.00103 | 1.70  | Normal up vs Off IS Tolerant   |
| 244031_PM_at    | ---       | ---                                                      | 0.00103 | 1.74  | Normal up vs Off IS Tolerant   |
| 207861_PM_at    | CCL22     | chemokine (C-C motif) ligand 22                          | 0.00103 | -1.26 | Normal down vs Off IS Tolerant |
| 1558185_PM_at   | CLLU1     | chronic lymphocytic leukemia up-regulated 1              | 0.00104 | -1.88 | Normal down vs Off IS Tolerant |
| 1554872_PM_a_at | HMGCLL1   | 3-hydroxymethyl-3-methylglutaryl-CoA lyase-like 1        | 0.00104 | -1.36 | Normal down vs Off IS Tolerant |
| 208984_PM_x_at  | RBM10     | RNA binding motif protein 10                             | 0.00104 | 1.24  | Normal up vs Off IS Tolerant   |
| 215534_PM_at    | ---       | ---                                                      | 0.00104 | -1.21 | Normal down vs Off IS Tolerant |
| 206166_PM_s_at  | CLCA2     | chloride channel accessory 2                             | 0.00104 | -1.37 | Normal down vs Off IS Tolerant |
| 234645_PM_at    | ---       | ---                                                      | 0.00104 | 1.96  | Normal up vs Off IS Tolerant   |
| 237457_PM_at    | EIF3B     | eukaryotic translation initiation factor 3, subunit B    | 0.00104 | -1.36 | Normal down vs Off IS Tolerant |
| 1552266_PM_at   | ADAM32    | ADAM metallopeptidase domain 32                          | 0.00104 | -1.26 | Normal down vs Off IS Tolerant |
| 239487_PM_at    | FAM98A    | Family with sequence similarity 98, member A             | 0.00104 | 1.47  | Normal up vs Off IS Tolerant   |

|                 |          |                                                                                         |         |       |                                |
|-----------------|----------|-----------------------------------------------------------------------------------------|---------|-------|--------------------------------|
| 206008_PM_at    | TGM1     | transglutaminase 1 (K polypeptide epidermal type I, protein-glutamine-gamma-glutamyltra | 0.00105 | -1.21 | Normal down vs Off IS Tolerant |
| 226223_PM_at    | ---      | ---                                                                                     | 0.00105 | -2.20 | Normal down vs Off IS Tolerant |
| 243951_PM_at    | ABCB1    | ATP-binding cassette, sub-family B (MDR/TAP), member 1                                  | 0.00105 | 1.74  | Normal up vs Off IS Tolerant   |
| 241888_PM_at    | ---      | ---                                                                                     | 0.00105 | 1.32  | Normal up vs Off IS Tolerant   |
| 200797_PM_s_at  | MCL1     | myeloid cell leukemia sequence 1 (BCL2-related)                                         | 0.00106 | -1.29 | Normal down vs Off IS Tolerant |
| 204359_PM_at    | FLRT2    | fibronectin leucine rich transmembrane protein 2                                        | 0.00106 | -1.34 | Normal down vs Off IS Tolerant |
| 219512_PM_at    | DSN1     | DSN1, MIND kinetochore complex component, homolog ( <i>S. cerevisiae</i> )              | 0.00106 | 1.37  | Normal up vs Off IS Tolerant   |
| 203331_PM_s_at  | INPP5D   | inositol polyphosphate-5-phosphatase, 145kDa                                            | 0.00106 | 1.37  | Normal up vs Off IS Tolerant   |
| 242669_PM_at    | UFM1     | Ubiquitin-fold modifier 1                                                               | 0.00106 | 1.75  | Normal up vs Off IS Tolerant   |
| 212046_PM_x_at  | MAPK3    | mitogen-activated protein kinase 3                                                      | 0.00106 | -1.48 | Normal down vs Off IS Tolerant |
| 213976_PM_at    | CIZ1     | CDKN1A interacting zinc finger protein 1                                                | 0.00106 | -1.29 | Normal down vs Off IS Tolerant |
| 1556613_PM_s_at | DPY19L4  | dpy-19-like 4 ( <i>C. elegans</i> )                                                     | 0.00106 | 1.49  | Normal up vs Off IS Tolerant   |
| 229230_PM_at    | OSTalpha | organic solute transporter alpha                                                        | 0.00106 | -1.26 | Normal down vs Off IS Tolerant |
| 214256_PM_at    | ATP10A   | ATPase, class V, type 10A                                                               | 0.00107 | -1.39 | Normal down vs Off IS Tolerant |
| 217347_PM_at    | ---      | ---                                                                                     | 0.00107 | 1.27  | Normal up vs Off IS Tolerant   |
| 230273_PM_at    | C6orf165 | chromosome 6 open reading frame 165                                                     | 0.00107 | -1.41 | Normal down vs Off IS Tolerant |
| 206572_PM_x_at  | ZNF85    | zinc finger protein 85                                                                  | 0.00107 | 1.42  | Normal up vs Off IS Tolerant   |
| 1553380_PM_at   | PARP15   | poly (ADP-ribose) polymerase family, member 15                                          | 0.00107 | 1.57  | Normal up vs Off IS Tolerant   |
| 212566_PM_at    | MAP4     | microtubule-associated protein 4                                                        | 0.00107 | 1.37  | Normal up vs Off IS Tolerant   |
| 223175_PM_s_at  | FEM1A    | fem-1 homolog a ( <i>C. elegans</i> )                                                   | 0.00107 | 1.40  | Normal up vs Off IS Tolerant   |
| 237470_PM_at    | DOCK7    | dedicator of cytokinesis 7                                                              | 0.00108 | 1.40  | Normal up vs Off IS Tolerant   |

|                 |                |                                                      |         |       |                                |
|-----------------|----------------|------------------------------------------------------|---------|-------|--------------------------------|
| 207009_PM_at    | PHOX2B         | paired-like homeobox 2b                              | 0.00108 | -1.46 | Normal down vs Off IS Tolerant |
| 216867_PM_s_at  | PDGFA          | platelet-derived growth factor alpha polypeptide     | 0.00108 | 1.91  | Normal up vs Off IS Tolerant   |
| 208242_PM_at    | RAX            | retina and anterior neural fold homeobox             | 0.00108 | -1.28 | Normal down vs Off IS Tolerant |
| 1559154_PM_at   | ---            | ---                                                  | 0.00108 | 1.57  | Normal up vs Off IS Tolerant   |
| 1555559_PM_s_at | USP25          | ubiquitin specific peptidase 25                      | 0.00108 | -1.37 | Normal down vs Off IS Tolerant |
| 244380_PM_at    | ---            | ---                                                  | 0.00108 | -1.20 | Normal down vs Off IS Tolerant |
| 238071_PM_at    | LCN10 /// LCN6 | lipocalin 10 /// lipocalin 6                         | 0.00108 | -1.54 | Normal down vs Off IS Tolerant |
| 222831_PM_at    | SAP30L         | SAP30-like                                           | 0.00108 | -1.76 | Normal down vs Off IS Tolerant |
| 33760_PM_at     | PEX14          | peroxisomal biogenesis factor 14                     | 0.00108 | 1.35  | Normal up vs Off IS Tolerant   |
| 223450_PM_s_at  | COG3           | component of oligomeric golgi complex 3              | 0.00108 | 1.32  | Normal up vs Off IS Tolerant   |
| 225406_PM_at    | TWSG1          | twisted gastrulation homolog 1 (Drosophila)          | 0.00108 | 1.40  | Normal up vs Off IS Tolerant   |
| 227087_PM_at    | INPP4A         | inositol polyphosphate-4-phosphatase, type I, 107kDa | 0.00109 | 1.37  | Normal up vs Off IS Tolerant   |
| 243468_PM_at    | PATE1          | prostate and testis expressed 1                      | 0.00109 | -1.45 | Normal down vs Off IS Tolerant |
| 216345_PM_at    | KIAA0913       | KIAA0913                                             | 0.00109 | -1.43 | Normal down vs Off IS Tolerant |
| 219408_PM_at    | PRMT7          | protein arginine methyltransferase 7                 | 0.00109 | 1.37  | Normal up vs Off IS Tolerant   |
| 1552314_PM_a_at | EYA3           | eyes absent homolog 3 (Drosophila)                   | 0.00109 | 1.47  | Normal up vs Off IS Tolerant   |
| 235300_PM_x_at  | RCHY1          | ring finger and CHY zinc finger domain containing 1  | 0.00109 | 1.47  | Normal up vs Off IS Tolerant   |
| 1563283_PM_at   | ---            | ---                                                  | 0.00109 | -1.30 | Normal down vs Off IS Tolerant |
| 235525_PM_at    | ---            | ---                                                  | 0.00109 | -1.27 | Normal down vs Off IS Tolerant |

|                |              |                                                                                         |         |       |                                |
|----------------|--------------|-----------------------------------------------------------------------------------------|---------|-------|--------------------------------|
| 1556344_PM_at  | LOC150051    | hypothetical LOC150051                                                                  | 0.00109 | -1.27 | Normal down vs Off IS Tolerant |
| 212258_PM_s_at | SMARCA2      | SWI/SNF related, matrix associated, actin dependent regulator of chromatin, subfamily a | 0.00109 | -1.39 | Normal down vs Off IS Tolerant |
| 244491_PM_at   | ---          | ---                                                                                     | 0.00109 | -1.40 | Normal down vs Off IS Tolerant |
| 224099_PM_at   | KCNH7        | potassium voltage-gated channel, subfamily H (eag-related), member 7                    | 0.00110 | -3.43 | Normal down vs Off IS Tolerant |
| 217851_PM_s_at | SLMO2        | slowmo homolog 2 (Drosophila)                                                           | 0.00110 | 1.66  | Normal up vs Off IS Tolerant   |
| 242021_PM_at   | XBP1         | X-box binding protein 1                                                                 | 0.00111 | -1.58 | Normal down vs Off IS Tolerant |
| 218606_PM_at   | ZDHHC7       | zinc finger, DHHC-type containing 7                                                     | 0.00111 | -1.35 | Normal down vs Off IS Tolerant |
| 235078_PM_at   | ---          | ---                                                                                     | 0.00111 | 1.72  | Normal up vs Off IS Tolerant   |
| 231180_PM_at   | LOC100506591 | hypothetical LOC100506591                                                               | 0.00111 | -1.33 | Normal down vs Off IS Tolerant |
| 232891_PM_at   | SIRPD        | signal-regulatory protein delta                                                         | 0.00111 | -1.49 | Normal down vs Off IS Tolerant |
| 214642_PM_x_at | MAGEA5       | melanoma antigen family A, 5                                                            | 0.00111 | -1.51 | Normal down vs Off IS Tolerant |
| 202218_PM_s_at | FADS2        | fatty acid desaturase 2                                                                 | 0.00111 | -1.61 | Normal down vs Off IS Tolerant |
| 244307_PM_s_at | ---          | ---                                                                                     | 0.00111 | -1.30 | Normal down vs Off IS Tolerant |
| 201582_PM_at   | SEC23B       | Sec23 homolog B (S. cerevisiae)                                                         | 0.00111 | -1.45 | Normal down vs Off IS Tolerant |
| 211429_PM_s_at | SERPINA1     | serpin peptidase inhibitor, clade A (alpha-1 antitrypsin, antitrypsin), member 1        | 0.00111 | -1.48 | Normal down vs Off IS Tolerant |
| 203747_PM_at   | AQP3         | aquaporin 3 (Gill blood group)                                                          | 0.00111 | 1.56  | Normal up vs Off IS Tolerant   |
| 212569_PM_at   | SMCHD1       | structural maintenance of chromosomes flexible hinge domain containing 1                | 0.00112 | 1.26  | Normal up vs Off IS Tolerant   |
| 238581_PM_at   | GBP5         | guanylate binding protein 5                                                             | 0.00112 | 2.11  | Normal up vs Off IS Tolerant   |

|                |          |                                                                          |         |       |                                |
|----------------|----------|--------------------------------------------------------------------------|---------|-------|--------------------------------|
| 234063_PM_at   | ---      | ---                                                                      | 0.00112 | -1.32 | Normal down vs Off IS Tolerant |
| 203384_PM_s_at | GOLGA1   | golgin A1                                                                | 0.00112 | 1.44  | Normal up vs Off IS Tolerant   |
| 203387_PM_s_at | TBC1D4   | TBC1 domain family, member 4                                             | 0.00112 | 1.84  | Normal up vs Off IS Tolerant   |
| 231025_PM_at   | ---      | ---                                                                      | 0.00112 | -1.27 | Normal down vs Off IS Tolerant |
| 230116_PM_at   | KRT8P12  | Keratin 8 pseudogene 12                                                  | 0.00112 | -1.33 | Normal down vs Off IS Tolerant |
| 210253_PM_at   | HTATIP2  | HIV-1 Tat interactive protein 2, 30kDa                                   | 0.00112 | 1.59  | Normal up vs Off IS Tolerant   |
| 1566956_PM_at  | OR7E104P | olfactory receptor, family 7, subfamily E, member 104 pseudogene         | 0.00112 | -1.83 | Normal down vs Off IS Tolerant |
| 201198_PM_s_at | PSMD1    | proteasome (prosome, macropain) 26S subunit, non-ATPase, 1               | 0.00113 | -1.38 | Normal down vs Off IS Tolerant |
| 242763_PM_at   | ---      | ---                                                                      | 0.00113 | -1.31 | Normal down vs Off IS Tolerant |
| 228721_PM_at   | LOC26172 | hypothetical LOC26172                                                    | 0.00113 | -1.25 | Normal down vs Off IS Tolerant |
| 236910_PM_at   | MRPL39   | Mitochondrial ribosomal protein L39                                      | 0.00113 | 1.46  | Normal up vs Off IS Tolerant   |
| 212579_PM_at   | SMCHD1   | structural maintenance of chromosomes flexible hinge domain containing 1 | 0.00113 | 1.33  | Normal up vs Off IS Tolerant   |
| 206546_PM_at   | SYCP2    | synaptonemal complex protein 2                                           | 0.00113 | 1.37  | Normal up vs Off IS Tolerant   |
| 210278_PM_s_at | AP4S1    | adaptor-related protein complex 4, sigma 1 subunit                       | 0.00113 | 1.41  | Normal up vs Off IS Tolerant   |
| 202372_PM_at   | RAB3GAP2 | RAB3 GTPase activating protein subunit 2 (non-catalytic)                 | 0.00114 | 1.43  | Normal up vs Off IS Tolerant   |
| 200864_PM_s_at | RAB11A   | RAB11A, member RAS oncogene family                                       | 0.00114 | 1.59  | Normal up vs Off IS Tolerant   |
| 213672_PM_at   | MARS     | methionyl-tRNA synthetase                                                | 0.00114 | 1.49  | Normal up vs Off IS Tolerant   |
| 236195_PM_x_at | PRKCG    | protein kinase C, gamma                                                  | 0.00115 | -1.36 | Normal down vs Off IS Tolerant |
| 49306_PM_at    | RASSF4   | Ras association (RalGDS/AF-6) domain family member 4                     | 0.00115 | -1.64 | Normal down vs Off IS Tolerant |
| 206248_PM_at   | PRKCE    | protein kinase C, epsilon                                                | 0.00115 | -1.23 | Normal down vs Off IS Tolerant |
| 205748_PM_s_at | RNF126   | ring finger protein 126                                                  | 0.00115 | 1.78  | Normal up vs Off IS Tolerant   |

|                |                  |                                                                                         |         |       |                                |
|----------------|------------------|-----------------------------------------------------------------------------------------|---------|-------|--------------------------------|
| 232063_PM_x_at | FARSB /// TRIM61 | phenylalanyl-tRNA synthetase, beta subunit /// tripartite motif-containing 61           | 0.00115 | 1.57  | Normal up vs Off IS Tolerant   |
| 203293_PM_s_at | LMAN1            | lectin, mannose-binding, 1                                                              | 0.00115 | -1.25 | Normal down vs Off IS Tolerant |
| 234683_PM_at   | KRTAP4-6         | keratin associated protein 4-6                                                          | 0.00115 | -1.29 | Normal down vs Off IS Tolerant |
| 223085_PM_at   | RNF19A           | ring finger protein 19A                                                                 | 0.00116 | 1.39  | Normal up vs Off IS Tolerant   |
| 215858_PM_at   | ---              | ---                                                                                     | 0.00116 | -1.30 | Normal down vs Off IS Tolerant |
| 242919_PM_at   | ZNF253           | zinc finger protein 253                                                                 | 0.00116 | 1.42  | Normal up vs Off IS Tolerant   |
| 202606_PM_s_at | TLK1             | tousled-like kinase 1                                                                   | 0.00116 | 1.35  | Normal up vs Off IS Tolerant   |
| 236340_PM_at   | LOC100506380     | hypothetical LOC100506380                                                               | 0.00116 | -1.25 | Normal down vs Off IS Tolerant |
| 212374_PM_at   | FEM1B            | fem-1 homolog b (C. elegans)                                                            | 0.00117 | 1.81  | Normal up vs Off IS Tolerant   |
| 221935_PM_s_at | C3orf64          | chromosome 3 open reading frame 64                                                      | 0.00117 | 1.70  | Normal up vs Off IS Tolerant   |
| 35820_PM_at    | GM2A             | GM2 ganglioside activator                                                               | 0.00117 | -1.59 | Normal down vs Off IS Tolerant |
| 226841_PM_at   | MPEG1            | macrophage expressed 1                                                                  | 0.00117 | -1.39 | Normal down vs Off IS Tolerant |
| 223300_PM_s_at | CCDC82           | coiled-coil domain containing 82                                                        | 0.00117 | 1.45  | Normal up vs Off IS Tolerant   |
| 228541_PM_x_at | LOC100507029     | hypothetical LOC100507029                                                               | 0.00117 | 1.28  | Normal up vs Off IS Tolerant   |
| 232853_PM_at   | ---              | ---                                                                                     | 0.00117 | -1.29 | Normal down vs Off IS Tolerant |
| 211731_PM_x_at | SSX3             | synovial sarcoma, X breakpoint 3                                                        | 0.00117 | -1.33 | Normal down vs Off IS Tolerant |
| 221217_PM_s_at | RBFOX1           | RNA binding protein, fox-1 homolog (C. elegans) 1                                       | 0.00117 | -1.23 | Normal down vs Off IS Tolerant |
| 224007_PM_at   | HSFY1 /// HSFY2  | heat shock transcription factor, Y-linked 1 /// heat shock transcription factor, Y link | 0.00117 | -1.66 | Normal down vs Off IS Tolerant |
| 222765_PM_x_at | ESF1             | ESF1, nucleolar pre-rRNA processing protein, homolog (S. cerevisiae)                    | 0.00118 | 1.61  | Normal up vs Off IS Tolerant   |
| 1557892_PM_at  | LOC100144597     | hypothetical LOC100144597                                                               | 0.00118 | -1.28 | Normal down vs Off IS Tolerant |

|                 |          |                                                          |         |       |                                |
|-----------------|----------|----------------------------------------------------------|---------|-------|--------------------------------|
| 205484_PM_at    | SIT1     | signaling threshold regulating transmembrane adaptor 1   | 0.00118 | -1.40 | Normal down vs Off IS Tolerant |
| 1557053_PM_s_at | UBE2G2   | ubiquitin-conjugating enzyme E2G 2 (UBC7 homolog, yeast) | 0.00118 | 1.25  | Normal up vs Off IS Tolerant   |
| 1559126_PM_at   | RRP12    | ribosomal RNA processing 12 homolog (S. cerevisiae)      | 0.00118 | 1.35  | Normal up vs Off IS Tolerant   |
| 206521_PM_s_at  | GTF2A1   | general transcription factor IIA, 1, 19/37kDa            | 0.00118 | -1.30 | Normal down vs Off IS Tolerant |
| 206506_PM_s_at  | SUPT3H   | suppressor of Ty 3 homolog (S. cerevisiae)               | 0.00118 | 1.64  | Normal up vs Off IS Tolerant   |
| 206907_PM_at    | TNFSF9   | tumor necrosis factor (ligand) superfamily, member 9     | 0.00118 | 1.52  | Normal up vs Off IS Tolerant   |
| 204075_PM_s_at  | KIAA0562 | KIAA0562                                                 | 0.00118 | 1.88  | Normal up vs Off IS Tolerant   |
| 229029_PM_at    | CAMK4    | calcium/calmodulin-dependent protein kinase IV           | 0.00118 | 2.19  | Normal up vs Off IS Tolerant   |
| 228499_PM_at    | PFKFB4   | 6-phosphofructo-2-kinase/fructose-2,6-biphosphatase 4    | 0.00118 | -1.52 | Normal down vs Off IS Tolerant |
| 231530_PM_s_at  | C11orf1  | chromosome 11 open reading frame 1                       | 0.00118 | 1.75  | Normal up vs Off IS Tolerant   |
| 235353_PM_at    | SEL1L3   | sel-1 suppressor of lin-12-like 3 (C. elegans)           | 0.00118 | 1.74  | Normal up vs Off IS Tolerant   |
| 202817_PM_s_at  | SS18     | synovial sarcoma translocation, chromosome 18            | 0.00118 | 1.53  | Normal up vs Off IS Tolerant   |
| 227313_PM_at    | CNPY4    | canopy 4 homolog (zebrafish)                             | 0.00118 | 1.42  | Normal up vs Off IS Tolerant   |
| 228569_PM_at    | PAPOLA   | poly(A) polymerase alpha                                 | 0.00118 | 1.60  | Normal up vs Off IS Tolerant   |
| 242224_PM_at    | GPATCH2  | G patch domain containing 2                              | 0.00118 | -1.50 | Normal down vs Off IS Tolerant |
| 242109_PM_at    | SYTL3    | Synaptotagmin-like 3                                     | 0.00119 | 2.34  | Normal up vs Off IS Tolerant   |
| 242982_PM_x_at  | ITGB8    | integrin, beta 8                                         | 0.00119 | -1.79 | Normal down vs Off IS Tolerant |
| 213505_PM_s_at  | SUGP2    | SURP and G patch domain containing 2                     | 0.00119 | 1.32  | Normal up vs Off IS Tolerant   |
| 219498_PM_s_at  | BCL11A   | B-cell CLL/lymphoma 11A (zinc finger protein)            | 0.00119 | -1.63 | Normal down vs Off IS Tolerant |
| 244341_PM_at    | ---      | ---                                                      | 0.00119 | 1.51  | Normal up vs Off IS Tolerant   |
| 211585_PM_at    | NPAT     | nuclear protein, ataxia-telangiectasia locus             | 0.00119 | -2.50 | Normal down vs Off IS Tolerant |

|                |          |                                                                     |         |       |                                |
|----------------|----------|---------------------------------------------------------------------|---------|-------|--------------------------------|
| 238646_PM_at   | ---      | ---                                                                 | 0.00119 | 1.66  | Normal up vs Off IS Tolerant   |
| 220480_PM_at   | HAND2    | heart and neural crest derivatives expressed 2                      | 0.00119 | -1.25 | Normal down vs Off IS Tolerant |
| 218052_PM_s_at | ATP13A1  | ATPase type 13A1                                                    | 0.00119 | 1.60  | Normal up vs Off IS Tolerant   |
| 212783_PM_at   | RBBP6    | retinoblastoma binding protein 6                                    | 0.00119 | 1.28  | Normal up vs Off IS Tolerant   |
| 207914_PM_x_at | EVX1     | even-skipped homeobox 1                                             | 0.00120 | -1.30 | Normal down vs Off IS Tolerant |
| 211081_PM_s_at | MAP4K5   | mitogen-activated protein kinase kinase kinase 5                    | 0.00120 | 1.64  | Normal up vs Off IS Tolerant   |
| 227685_PM_at   | TMF1     | TATA element modulatory factor 1                                    | 0.00120 | 1.43  | Normal up vs Off IS Tolerant   |
| 203950_PM_s_at | CLCN6    | chloride channel 6                                                  | 0.00121 | 1.33  | Normal up vs Off IS Tolerant   |
| 212453_PM_at   | KIAA1279 | KIAA1279                                                            | 0.00121 | 1.69  | Normal up vs Off IS Tolerant   |
| 226787_PM_at   | ZNF18    | zinc finger protein 18                                              | 0.00121 | 1.27  | Normal up vs Off IS Tolerant   |
| 203934_PM_at   | KDR      | kinase insert domain receptor (a type III receptor tyrosine kinase) | 0.00121 | -1.26 | Normal down vs Off IS Tolerant |
| 226003_PM_at   | KIF21A   | kinesin family member 21A                                           | 0.00121 | 1.73  | Normal up vs Off IS Tolerant   |
| 217030_PM_at   | ---      | ---                                                                 | 0.00121 | -1.43 | Normal down vs Off IS Tolerant |
| 222796_PM_at   | PTCD1    | pentatricopeptide repeat domain 1                                   | 0.00121 | 1.48  | Normal up vs Off IS Tolerant   |
| 230644_PM_at   | LRFN5    | leucine rich repeat and fibronectin type III domain containing 5    | 0.00121 | -1.89 | Normal down vs Off IS Tolerant |
| 212261_PM_at   | GIGYF2   | GRB10 interacting GYF protein 2                                     | 0.00121 | 1.32  | Normal up vs Off IS Tolerant   |
| 212103_PM_at   | KPNA6    | karyopherin alpha 6 (importin alpha 7)                              | 0.00122 | 1.65  | Normal up vs Off IS Tolerant   |
| 1557120_PM_at  | EEF1A1   | Eukaryotic translation elongation factor 1 alpha 1                  | 0.00122 | 1.20  | Normal up vs Off IS Tolerant   |
| 228314_PM_at   | LRRC8C   | leucine rich repeat containing 8 family, member C                   | 0.00122 | 1.70  | Normal up vs Off IS Tolerant   |
| 236528_PM_at   | ---      | ---                                                                 | 0.00122 | 1.73  | Normal up vs Off IS Tolerant   |
| 230489_PM_at   | CD5      | CD5 molecule                                                        | 0.00122 | 1.78  | Normal up vs Off IS Tolerant   |
| 218799_PM_at   | GPN2     | GPN-loop GTPase 2                                                   | 0.00122 | 1.40  | Normal up vs Off IS Tolerant   |
| 225345_PM_s_at | ---      | ---                                                                 | 0.00123 | 1.41  | Normal up vs Off IS Tolerant   |
| 243609_PM_at   | CYP3A7   | cytochrome P450, family 3, subfamily A, polypeptide 7               | 0.00123 | -1.67 | Normal down vs Off IS Tolerant |
| 211276_PM_at   | TCEAL2   | transcription elongation factor A (SII)-like 2                      | 0.00123 | 1.27  | Normal up vs Off IS Tolerant   |



|                 |           |                                                                             |         |       |                                |
|-----------------|-----------|-----------------------------------------------------------------------------|---------|-------|--------------------------------|
| 241375_PM_at    | USP38     | ubiquitin specific peptidase 38                                             | 0.00123 | 1.79  | Normal up vs Off IS Tolerant   |
| 232389_PM_at    | WIPF3     | WAS/WASL interacting protein family, member 3                               | 0.00123 | -1.22 | Normal down vs Off IS Tolerant |
| 233421_PM_s_at  | NUP133    | nucleoporin 133kDa                                                          | 0.00123 | 1.25  | Normal up vs Off IS Tolerant   |
| 226030_PM_at    | ACADSB    | acyl-CoA dehydrogenase, short/branched chain                                | 0.00123 | 1.57  | Normal up vs Off IS Tolerant   |
| 241322_PM_at    | ---       | ---                                                                         | 0.00123 | -1.31 | Normal down vs Off IS Tolerant |
| 240554_PM_at    | AKAP8L    | A kinase (PRKA) anchor protein 8-like                                       | 0.00124 | 1.59  | Normal up vs Off IS Tolerant   |
| 204742_PM_s_at  | PDS5B     | PDS5, regulator of cohesion maintenance, homolog B ( <i>S. cerevisiae</i> ) | 0.00124 | 1.54  | Normal up vs Off IS Tolerant   |
| 242249_PM_at    | ---       | ---                                                                         | 0.00124 | -1.70 | Normal down vs Off IS Tolerant |
| 225963_PM_at    | KLHDC5    | kelch domain containing 5                                                   | 0.00124 | 1.35  | Normal up vs Off IS Tolerant   |
| 235103_PM_at    | MAN2A1    | mannosidase, alpha, class 2A, member 1                                      | 0.00124 | 1.43  | Normal up vs Off IS Tolerant   |
| 203932_PM_at    | HLA-DMB   | major histocompatibility complex, class II, DM beta                         | 0.00124 | -1.27 | Normal down vs Off IS Tolerant |
| 238483_PM_at    | SSBP2     | single-stranded DNA binding protein 2                                       | 0.00124 | 1.48  | Normal up vs Off IS Tolerant   |
| 228639_PM_at    | ---       | ---                                                                         | 0.00124 | 1.43  | Normal up vs Off IS Tolerant   |
| 233929_PM_x_at  | WASH3P    | WAS protein family homolog 3 pseudogene                                     | 0.00124 | 1.33  | Normal up vs Off IS Tolerant   |
| 213367_PM_at    | LOC155060 | AI894139 pseudogene                                                         | 0.00125 | 1.32  | Normal up vs Off IS Tolerant   |
| 203184_PM_at    | FBN2      | fibrillin 2                                                                 | 0.00125 | -1.82 | Normal down vs Off IS Tolerant |
| 231953_PM_at    | BPTF      | bromodomain PHD finger transcription factor                                 | 0.00125 | 1.48  | Normal up vs Off IS Tolerant   |
| 203922_PM_s_at  | CYBB      | cytochrome b-245, beta polypeptide                                          | 0.00125 | -1.44 | Normal down vs Off IS Tolerant |
| 216857_PM_at    | IL23A     | Interleukin 23, alpha subunit p19                                           | 0.00125 | 1.52  | Normal up vs Off IS Tolerant   |
| 235698_PM_at    | ZFP90     | zinc finger protein 90 homolog (mouse)                                      | 0.00125 | 1.95  | Normal up vs Off IS Tolerant   |
| 1569470_PM_a_at | FRMD5     | FERM domain containing 5                                                    | 0.00125 | -1.23 | Normal down vs Off IS Tolerant |

|                |           |                                                                                        |         |       |                                |
|----------------|-----------|----------------------------------------------------------------------------------------|---------|-------|--------------------------------|
| 203141_PM_s_at | AP3B1     | adaptor-related protein complex 3, beta 1 subunit                                      | 0.00125 | -1.38 | Normal down vs Off IS Tolerant |
| 1556954_PM_at  | LOC283854 | hypothetical protein LOC283854                                                         | 0.00125 | -1.29 | Normal down vs Off IS Tolerant |
| 239074_PM_at   | GRAPL     | GRB2-related adaptor protein-like                                                      | 0.00125 | -1.27 | Normal down vs Off IS Tolerant |
| 224250_PM_s_at | SECISBP2  | SECIS binding protein 2                                                                | 0.00126 | 1.21  | Normal up vs Off IS Tolerant   |
| 226421_PM_at   | AMMECR1   | Alport syndrome, mental retardation, midface hypoplasia and elliptocytosis chromosomal | 0.00126 | 1.78  | Normal up vs Off IS Tolerant   |
| 208555_PM_x_at | CST2      | cystatin SA                                                                            | 0.00126 | -1.21 | Normal down vs Off IS Tolerant |
| 218797_PM_s_at | SIRT7     | sirtuin 7                                                                              | 0.00126 | 1.35  | Normal up vs Off IS Tolerant   |
| 220566_PM_at   | PIK3R5    | phosphoinositide-3-kinase, regulatory subunit 5                                        | 0.00126 | 1.58  | Normal up vs Off IS Tolerant   |
| 240365_PM_at   | LOC647946 | hypothetical LOC647946                                                                 | 0.00126 | -1.34 | Normal down vs Off IS Tolerant |
| 52005_PM_at    | WIZ       | widely interspaced zinc finger motifs                                                  | 0.00126 | 1.42  | Normal up vs Off IS Tolerant   |
| 207333_PM_at   | NMBR      | neuromedin B receptor                                                                  | 0.00126 | -1.47 | Normal down vs Off IS Tolerant |
| 201269_PM_s_at | NUDCD3    | NudC domain containing 3                                                               | 0.00126 | 1.31  | Normal up vs Off IS Tolerant   |
| 213058_PM_at   | TTC28     | tetratricopeptide repeat domain 28                                                     | 0.00126 | 1.38  | Normal up vs Off IS Tolerant   |
| 222916_PM_s_at | HDLBP     | high density lipoprotein binding protein                                               | 0.00126 | 1.35  | Normal up vs Off IS Tolerant   |
| 239531_PM_at   | ---       | ---                                                                                    | 0.00127 | 1.39  | Normal up vs Off IS Tolerant   |
| 1558369_PM_at  | MPHOSPH9  | M-phase phosphoprotein 9                                                               | 0.00127 | 1.69  | Normal up vs Off IS Tolerant   |
| 213000_PM_at   | MORC3     | MORC family CW-type zinc finger 3                                                      | 0.00127 | 1.48  | Normal up vs Off IS Tolerant   |
| 207352_PM_s_at | GABRB2    | gamma-aminobutyric acid (GABA) A receptor, beta 2                                      | 0.00127 | -1.37 | Normal down vs Off IS Tolerant |
| 206395_PM_at   | DGKG      | diacylglycerol kinase, gamma 90kDa                                                     | 0.00127 | -1.25 | Normal down vs Off IS Tolerant |
| 1559322_PM_at  | LOC727916 | hypothetical protein LOC727916                                                         | 0.00127 | 1.26  | Normal up vs Off IS Tolerant   |
| 1563611_PM_at  | ---       | ---                                                                                    | 0.00127 | -1.32 | Normal down vs Off IS Tolerant |
| 1558458_PM_at  | LOC401320 | Hypothetical LOC401320                                                                 | 0.00128 | 1.68  | Normal up vs Off IS Tolerant   |

|                |            |                                                                          |         |       |                                |
|----------------|------------|--------------------------------------------------------------------------|---------|-------|--------------------------------|
| 237970_PM_at   | ---        | ---                                                                      | 0.00128 | -2.00 | Normal down vs Off IS Tolerant |
| 227594_PM_at   | ZMYM6      | zinc finger, MYM-type 6                                                  | 0.00128 | 1.58  | Normal up vs Off IS Tolerant   |
| 229151_PM_at   | SLC14A1    | solute carrier family 14 (urea transporter), member 1 (Kidd blood group) | 0.00128 | 2.19  | Normal up vs Off IS Tolerant   |
| 214289_PM_at   | PSMB1      | Proteasome (prosome, macropain) subunit, beta type, 1                    | 0.00128 | 1.48  | Normal up vs Off IS Tolerant   |
| 1558588_PM_at  | ---        | ---                                                                      | 0.00129 | -1.84 | Normal down vs Off IS Tolerant |
| 209146_PM_at   | SC4MOL     | sterol-C4-methyl oxidase-like                                            | 0.00129 | 1.51  | Normal up vs Off IS Tolerant   |
| 217925_PM_s_at | C6orf106   | chromosome 6 open reading frame 106                                      | 0.00129 | 1.41  | Normal up vs Off IS Tolerant   |
| 222305_PM_at   | HK2        | hexokinase 2                                                             | 0.00129 | -1.33 | Normal down vs Off IS Tolerant |
| 1559521_PM_at  | ---        | ---                                                                      | 0.00129 | -1.56 | Normal down vs Off IS Tolerant |
| 208167_PM_s_at | MMP16      | matrix metalloproteinase 16 (membrane-inserted)                          | 0.00129 | -1.60 | Normal down vs Off IS Tolerant |
| 204037_PM_at   | LPAR1      | lysophosphatidic acid receptor 1                                         | 0.00129 | -1.37 | Normal down vs Off IS Tolerant |
| 219515_PM_at   | PRDM10     | PR domain containing 10                                                  | 0.00129 | 1.43  | Normal up vs Off IS Tolerant   |
| 225753_PM_at   | ZNF513     | zinc finger protein 513                                                  | 0.00130 | 1.37  | Normal up vs Off IS Tolerant   |
| 225641_PM_at   | MEF2D      | myocyte enhancer factor 2D                                               | 0.00131 | 1.42  | Normal up vs Off IS Tolerant   |
| 216133_PM_at   | TRD@       | T cell receptor delta locus                                              | 0.00131 | 1.77  | Normal up vs Off IS Tolerant   |
| 203245_PM_s_at | NCRNA00094 | non-protein coding RNA 94                                                | 0.00131 | 1.63  | Normal up vs Off IS Tolerant   |
| 241858_PM_at   | ---        | ---                                                                      | 0.00131 | -1.32 | Normal down vs Off IS Tolerant |
| 229360_PM_at   | ZNF280B    | zinc finger protein 280B                                                 | 0.00131 | 1.35  | Normal up vs Off IS Tolerant   |
| 232335_PM_at   | ---        | ---                                                                      | 0.00131 | -1.57 | Normal down vs Off IS Tolerant |
| 219384_PM_s_at | ADAT1      | adenosine deaminase, tRNA-specific 1                                     | 0.00131 | 1.63  | Normal up vs Off IS Tolerant   |
| 232466_PM_at   | CUL4A      | Cullin 4A                                                                | 0.00131 | 1.64  | Normal up vs Off IS Tolerant   |
| 215038_PM_s_at | SETD2      | SET domain containing 2                                                  | 0.00131 | 1.51  | Normal up vs Off IS Tolerant   |
| 213318_PM_s_at | BAT3       | HLA-B associated transcript 3                                            | 0.00131 | 1.25  | Normal up vs Off IS Tolerant   |

|                 |              |                                                                                          |         |       |                                |
|-----------------|--------------|------------------------------------------------------------------------------------------|---------|-------|--------------------------------|
| 223276_PM_at    | C5orf62      | chromosome 5 open reading frame 62                                                       | 0.00131 | 1.76  | Normal up vs Off IS Tolerant   |
| 217144_PM_at    | UBB          | ubiquitin B                                                                              | 0.00131 | 1.83  | Normal up vs Off IS Tolerant   |
| 225628_PM_s_at  | MLLT6        | myeloid/lymphoid or mixed-lineage leukemia (trithorax homolog, Drosophila); translocate  | 0.00131 | 1.48  | Normal up vs Off IS Tolerant   |
| 1560524_PM_at   | GRAPL        | GRB2-related adaptor protein-like                                                        | 0.00132 | -1.31 | Normal down vs Off IS Tolerant |
| 203528_PM_at    | SEMA4D       | sema domain, immunoglobulin domain (Ig), transmembrane domain (TM) and short cytoplasmic | 0.00132 | 1.30  | Normal up vs Off IS Tolerant   |
| 226698_PM_at    | FCHSD1       | FCH and double SH3 domains 1                                                             | 0.00132 | 1.45  | Normal up vs Off IS Tolerant   |
| 218650_PM_at    | DGCR8        | DiGeorge syndrome critical region gene 8                                                 | 0.00132 | 1.69  | Normal up vs Off IS Tolerant   |
| 205708_PM_s_at  | TRPM2        | transient receptor potential cation channel, subfamily M, member 2                       | 0.00132 | -1.41 | Normal down vs Off IS Tolerant |
| 222810_PM_s_at  | RASAL2       | RAS protein activator like 2                                                             | 0.00132 | -1.51 | Normal down vs Off IS Tolerant |
| 203864_PM_s_at  | ACTN2        | actinin, alpha 2                                                                         | 0.00132 | -1.25 | Normal down vs Off IS Tolerant |
| 239683_PM_at    | CLYBL        | citrate lyase beta like                                                                  | 0.00133 | 1.29  | Normal up vs Off IS Tolerant   |
| 211332_PM_x_at  | HFE          | hemochromatosis                                                                          | 0.00133 | -1.31 | Normal down vs Off IS Tolerant |
| 237189_PM_at    | LOC100506360 | hypothetical LOC100506360                                                                | 0.00133 | 1.85  | Normal up vs Off IS Tolerant   |
| 224567_PM_x_at  | MALAT1       | metastasis associated lung adenocarcinoma transcript 1 (non-protein coding)              | 0.00133 | -1.18 | Normal down vs Off IS Tolerant |
| 217540_PM_at    | FAM55C       | family with sequence similarity 55, member C                                             | 0.00133 | 1.85  | Normal up vs Off IS Tolerant   |
| 1564263_PM_at   | LOC144817    | hypothetical protein LOC144817                                                           | 0.00133 | -1.42 | Normal down vs Off IS Tolerant |
| 210879_PM_s_at  | RAB11FIP5    | RAB11 family interacting protein 5 (class I)                                             | 0.00134 | 1.44  | Normal up vs Off IS Tolerant   |
| 1552788_PM_a_at | HELB         | helicase (DNA) B                                                                         | 0.00134 | 1.45  | Normal up vs Off IS Tolerant   |
| 217991_PM_x_at  | SSBP3        | single stranded DNA binding protein 3                                                    | 0.00134 | 1.29  | Normal up vs Off IS Tolerant   |

|                |           |                                                                                     |         |       |                                |
|----------------|-----------|-------------------------------------------------------------------------------------|---------|-------|--------------------------------|
| 210423_PM_s_at | SLC11A1   | solute carrier family 11 (proton-coupled divalent metal ion transporters), member 1 | 0.00134 | -1.62 | Normal down vs Off IS Tolerant |
| 228613_PM_at   | RAB11FIP3 | RAB11 family interacting protein 3 (class II)                                       | 0.00134 | 1.65  | Normal up vs Off IS Tolerant   |
| 220735_PM_s_at | SENP7     | SUMO1/sentrin specific peptidase 7                                                  | 0.00135 | 1.92  | Normal up vs Off IS Tolerant   |
| 228113_PM_at   | RAB37     | RAB37, member RAS oncogene family                                                   | 0.00135 | 1.41  | Normal up vs Off IS Tolerant   |
| 224781_PM_s_at | RBM17     | RNA binding motif protein 17                                                        | 0.00135 | 1.12  | Normal up vs Off IS Tolerant   |
| 237137_PM_at   | SCARNA2   | small Cajal body-specific RNA 2                                                     | 0.00135 | 1.33  | Normal up vs Off IS Tolerant   |
| 1555133_PM_at  | FAM9A     | family with sequence similarity 9, member A                                         | 0.00135 | -1.20 | Normal down vs Off IS Tolerant |
| 228547_PM_at   | NRXN1     | neurexin 1                                                                          | 0.00135 | -1.86 | Normal down vs Off IS Tolerant |
| 234662_PM_at   | RAD21L1   | RAD21-like 1 ( <i>S. pombe</i> )                                                    | 0.00135 | -1.34 | Normal down vs Off IS Tolerant |
| 205691_PM_at   | SYNGR3    | synaptogyrin 3                                                                      | 0.00136 | 1.60  | Normal up vs Off IS Tolerant   |
| 229261_PM_at   | ---       | ---                                                                                 | 0.00136 | -1.38 | Normal down vs Off IS Tolerant |
| 1557623_PM_at  | ---       | ---                                                                                 | 0.00136 | -1.29 | Normal down vs Off IS Tolerant |
| 202308_PM_at   | SREBF1    | sterol regulatory element binding transcription factor 1                            | 0.00136 | 1.39  | Normal up vs Off IS Tolerant   |
| 231368_PM_at   | BOD1P     | biorientation of chromosomes in cell division 1 pseudogene                          | 0.00137 | -1.26 | Normal down vs Off IS Tolerant |
| 218355_PM_at   | KIF4A     | kinesin family member 4A                                                            | 0.00137 | -1.25 | Normal down vs Off IS Tolerant |
| 237264_PM_at   | ---       | ---                                                                                 | 0.00137 | -1.62 | Normal down vs Off IS Tolerant |
| 206550_PM_s_at | NUP155    | nucleoporin 155kDa                                                                  | 0.00137 | 1.86  | Normal up vs Off IS Tolerant   |
| 236960_PM_at   | ---       | ---                                                                                 | 0.00137 | -1.22 | Normal down vs Off IS Tolerant |
| 220914_PM_at   | ---       | ---                                                                                 | 0.00137 | -1.31 | Normal down vs Off IS Tolerant |
| 243189_PM_at   | ---       | ---                                                                                 | 0.00137 | 1.85  | Normal up vs Off IS Tolerant   |
| 209315_PM_at   | HBS1L     | HBS1-like ( <i>S. cerevisiae</i> )                                                  | 0.00138 | 1.64  | Normal up vs Off IS Tolerant   |

|                 |           |                                                                                  |         |       |                                |
|-----------------|-----------|----------------------------------------------------------------------------------|---------|-------|--------------------------------|
| 242839_PM_at    | ---       | ---                                                                              | 0.00138 | 1.38  | Normal up vs Off IS Tolerant   |
| 1552845_PM_at   | CLDN15    | claudin 15                                                                       | 0.00138 | 1.45  | Normal up vs Off IS Tolerant   |
| 208617_PM_s_at  | PTP4A2    | protein tyrosine phosphatase type IVA, member 2                                  | 0.00138 | 1.18  | Normal up vs Off IS Tolerant   |
| 210811_PM_s_at  | DDX49     | DEAD (Asp-Glu-Ala-Asp) box polypeptide 49                                        | 0.00138 | 1.44  | Normal up vs Off IS Tolerant   |
| 38157_PM_at     | DOM3Z     | dom-3 homolog Z (C. elegans)                                                     | 0.00138 | 1.36  | Normal up vs Off IS Tolerant   |
| 238061_PM_at    | LGI3      | leucine-rich repeat LGI family, member 3                                         | 0.00138 | -1.22 | Normal down vs Off IS Tolerant |
| 243567_PM_at    | ---       | ---                                                                              | 0.00139 | -1.38 | Normal down vs Off IS Tolerant |
| 214039_PM_s_at  | LAPTM4B   | lysosomal protein transmembrane 4 beta                                           | 0.00139 | 1.71  | Normal up vs Off IS Tolerant   |
| 235154_PM_at    | TAF3      | TAF3 RNA polymerase II, TATA box binding protein (TBP)-associated factor, 140kDa | 0.00139 | 1.35  | Normal up vs Off IS Tolerant   |
| 212573_PM_at    | ENDOD1    | endonuclease domain containing 1                                                 | 0.00139 | 1.58  | Normal up vs Off IS Tolerant   |
| 233264_PM_at    | ---       | ---                                                                              | 0.00139 | 1.29  | Normal up vs Off IS Tolerant   |
| 205667_PM_at    | WRN       | Werner syndrome, RecQ helicase-like                                              | 0.00139 | 1.66  | Normal up vs Off IS Tolerant   |
| 200850_PM_s_at  | AHCYL1    | adenosylhomocysteinase-like 1                                                    | 0.00139 | -1.27 | Normal down vs Off IS Tolerant |
| 224243_PM_at    | APOA5     | apolipoprotein A-V                                                               | 0.00139 | -1.24 | Normal down vs Off IS Tolerant |
| 241334_PM_at    | ---       | ---                                                                              | 0.00139 | -1.29 | Normal down vs Off IS Tolerant |
| 1561760_PM_s_at | LOC645513 | Hypothetical LOC645513                                                           | 0.00139 | 1.47  | Normal up vs Off IS Tolerant   |
| 1555351_PM_s_at | PPHLN1    | periphilin 1                                                                     | 0.00139 | 1.40  | Normal up vs Off IS Tolerant   |
| 228606_PM_at    | TCTEX1D2  | Tctex1 domain containing 2                                                       | 0.00140 | 1.62  | Normal up vs Off IS Tolerant   |
| 203980_PM_at    | FABP4     | fatty acid binding protein 4, adipocyte                                          | 0.00140 | -1.40 | Normal down vs Off IS Tolerant |
| 242007_PM_at    | ---       | ---                                                                              | 0.00140 | -1.69 | Normal down vs Off IS Tolerant |
| 242632_PM_at    | FGD2      | FYVE, RhoGEF and PH domain containing 2                                          | 0.00140 | -1.28 | Normal down vs Off IS Tolerant |

|                |          |                                                                                         |         |       |                                |
|----------------|----------|-----------------------------------------------------------------------------------------|---------|-------|--------------------------------|
| 1558648_PM_at  | C15orf57 | chromosome 15 open reading frame 57                                                     | 0.00140 | -1.58 | Normal down vs Off IS Tolerant |
| 217461_PM_x_at | BTF3     | basic transcription factor 3                                                            | 0.00140 | 1.28  | Normal up vs Off IS Tolerant   |
| 1554636_PM_at  | ---      | ---                                                                                     | 0.00140 | 1.85  | Normal up vs Off IS Tolerant   |
| 205658_PM_s_at | SNAPC4   | small nuclear RNA activating complex, polypeptide 4, 190kDa                             | 0.00140 | 1.55  | Normal up vs Off IS Tolerant   |
| 227973_PM_at   | C2orf69  | chromosome 2 open reading frame 69                                                      | 0.00140 | 1.59  | Normal up vs Off IS Tolerant   |
| 213105_PM_s_at | C16orf42 | chromosome 16 open reading frame 42                                                     | 0.00140 | 1.43  | Normal up vs Off IS Tolerant   |
| 224079_PM_at   | IL17C    | interleukin 17C                                                                         | 0.00140 | -1.32 | Normal down vs Off IS Tolerant |
| 224711_PM_at   | YY1      | YY1 transcription factor                                                                | 0.00141 | 1.32  | Normal up vs Off IS Tolerant   |
| 231391_PM_at   | CTXN3    | cortexin 3                                                                              | 0.00141 | -1.25 | Normal down vs Off IS Tolerant |
| 213373_PM_s_at | CASP8    | caspase 8, apoptosis-related cysteine peptidase                                         | 0.00141 | 1.36  | Normal up vs Off IS Tolerant   |
| 208682_PM_s_at | MAGED2   | melanoma antigen family D, 2                                                            | 0.00141 | 1.41  | Normal up vs Off IS Tolerant   |
| 237386_PM_at   | ---      | ---                                                                                     | 0.00141 | 1.31  | Normal up vs Off IS Tolerant   |
| 242995_PM_at   | ---      | ---                                                                                     | 0.00142 | 1.56  | Normal up vs Off IS Tolerant   |
| 38398_PM_at    | MADD     | MAP-kinase activating death domain                                                      | 0.00142 | 1.30  | Normal up vs Off IS Tolerant   |
| 226316_PM_at   | ---      | ---                                                                                     | 0.00142 | 1.44  | Normal up vs Off IS Tolerant   |
| 225691_PM_at   | CDK12    | cyclin-dependent kinase 12                                                              | 0.00142 | 1.31  | Normal up vs Off IS Tolerant   |
| 213555_PM_at   | RWDD2A   | RWD domain containing 2A                                                                | 0.00142 | 1.46  | Normal up vs Off IS Tolerant   |
| 214602_PM_at   | COL4A4   | collagen, type IV, alpha 4                                                              | 0.00142 | 1.23  | Normal up vs Off IS Tolerant   |
| 237177_PM_at   | CNTN4    | contactin 4                                                                             | 0.00142 | -1.70 | Normal down vs Off IS Tolerant |
| 203754_PM_s_at | BRF1     | BRF1 homolog, subunit of RNA polymerase III transcription initiation factor IIIB (S. ce | 0.00142 | 1.41  | Normal up vs Off IS Tolerant   |
| 242543_PM_at   | SH2D6    | SH2 domain containing 6                                                                 | 0.00142 | -1.25 | Normal down vs Off IS Tolerant |
| 237939_PM_at   | EPHA5    | EPH receptor A5                                                                         | 0.00142 | -1.38 | Normal down vs Off IS Tolerant |
| 203778_PM_at   | MANBA    | mannosidase, beta A, lysosomal                                                          | 0.00143 | -1.27 | Normal down vs Off IS Tolerant |

|                |           |                                                       |         |       |                                |
|----------------|-----------|-------------------------------------------------------|---------|-------|--------------------------------|
| 41644_PM_at    | SASH1     | SAM and SH3 domain containing 1                       | 0.00143 | -1.64 | Normal down vs Off IS Tolerant |
| 220541_PM_at   | MMP26     | matrix metalloproteinase 26                           | 0.00143 | -1.42 | Normal down vs Off IS Tolerant |
| 208901_PM_s_at | TOP1      | topoisomerase (DNA) I                                 | 0.00143 | -1.26 | Normal down vs Off IS Tolerant |
| 214861_PM_at   | KDM4C     | lysine (K)-specific demethylase 4C                    | 0.00143 | 1.40  | Normal up vs Off IS Tolerant   |
| 209589_PM_s_at | EPHB2     | EPH receptor B2                                       | 0.00144 | -1.50 | Normal down vs Off IS Tolerant |
| 1560219_PM_at  | ASB3      | Ankyrin repeat and SOCS box-containing 3              | 0.00144 | -1.35 | Normal down vs Off IS Tolerant |
| 213113_PM_s_at | SLC43A3   | solute carrier family 43, member 3                    | 0.00144 | -1.51 | Normal down vs Off IS Tolerant |
| 201494_PM_at   | PRCP      | prolylcarboxypeptidase (angiotensinase C)             | 0.00144 | -1.31 | Normal down vs Off IS Tolerant |
| 211955_PM_at   | IPO5      | importin 5                                            | 0.00144 | 1.40  | Normal up vs Off IS Tolerant   |
| 218181_PM_s_at | MAP4K4    | mitogen-activated protein kinase kinase kinase 4      | 0.00144 | 1.44  | Normal up vs Off IS Tolerant   |
| 221393_PM_at   | TAAR3     | trace amine associated receptor 3 (gene/pseudogene)   | 0.00144 | -1.35 | Normal down vs Off IS Tolerant |
| 1560402_PM_at  | GAS5      | growth arrest-specific 5 (non-protein coding)         | 0.00144 | 1.25  | Normal up vs Off IS Tolerant   |
| 227103_PM_s_at | ECE2      | endothelin converting enzyme 2                        | 0.00144 | -1.27 | Normal down vs Off IS Tolerant |
| 212635_PM_at   | TNPO1     | transportin 1                                         | 0.00145 | 1.33  | Normal up vs Off IS Tolerant   |
| 234536_PM_at   | SARDH     | sarcosine dehydrogenase                               | 0.00145 | -1.45 | Normal down vs Off IS Tolerant |
| 220927_PM_s_at | HPSE2     | heparanase 2                                          | 0.00145 | -1.34 | Normal down vs Off IS Tolerant |
| 213070_PM_at   | PIK3C2A   | phosphoinositide-3-kinase, class 2, alpha polypeptide | 0.00145 | 1.50  | Normal up vs Off IS Tolerant   |
| 233859_PM_at   | C14orf145 | chromosome 14 open reading frame 145                  | 0.00145 | -1.36 | Normal down vs Off IS Tolerant |
| 221822_PM_at   | CCDC101   | coiled-coil domain containing 101                     | 0.00145 | 1.40  | Normal up vs Off IS Tolerant   |



|                 |                        |                                                                         |         |       |                                |
|-----------------|------------------------|-------------------------------------------------------------------------|---------|-------|--------------------------------|
| 225982_PM_at    | UBTF                   | upstream binding transcription factor, RNA polymerase I                 | 0.00145 | 1.28  | Normal up vs Off IS Tolerant   |
| 202167_PM_s_at  | MMS19                  | MMS19 nucleotide excision repair homolog ( <i>S. cerevisiae</i> )       | 0.00145 | 1.42  | Normal up vs Off IS Tolerant   |
| 200844_PM_s_at  | PRDX6                  | peroxiredoxin 6                                                         | 0.00146 | 1.33  | Normal up vs Off IS Tolerant   |
| 217969_PM_at    | C11orf2                | chromosome 11 open reading frame 2                                      | 0.00146 | 1.28  | Normal up vs Off IS Tolerant   |
| 1555967_PM_at   | ---                    | ---                                                                     | 0.00146 | 1.52  | Normal up vs Off IS Tolerant   |
| 1561651_PM_s_at | TAL1                   | T-cell acute lymphocytic leukemia 1                                     | 0.00146 | 1.96  | Normal up vs Off IS Tolerant   |
| 219738_PM_s_at  | PCDH9                  | protocadherin 9                                                         | 0.00146 | -1.72 | Normal down vs Off IS Tolerant |
| 212083_PM_at    | TEX261                 | testis expressed 261                                                    | 0.00147 | 1.44  | Normal up vs Off IS Tolerant   |
| 1568870_PM_at   | SLC24A4                | solute carrier family 24 (sodium/potassium/calcium exchanger), member 4 | 0.00147 | -1.50 | Normal down vs Off IS Tolerant |
| 224863_PM_at    | GNAQ                   | guanine nucleotide binding protein (G protein), q polypeptide           | 0.00147 | -1.30 | Normal down vs Off IS Tolerant |
| 206777_PM_s_at  | CRYBB2 ///<br>CRYBB2P1 | crystallin, beta B2 /// crystallin, beta B2 pseudogene 1                | 0.00147 | 1.89  | Normal up vs Off IS Tolerant   |
| 213254_PM_at    | TNRC6B                 | trinucleotide repeat containing 6B                                      | 0.00147 | 1.27  | Normal up vs Off IS Tolerant   |
| 1569366_PM_a_at | ZNF569                 | zinc finger protein 569                                                 | 0.00147 | 1.60  | Normal up vs Off IS Tolerant   |
| 223023_PM_at    | BET1L                  | blocked early in transport 1 homolog ( <i>S. cerevisiae</i> )-like      | 0.00147 | 1.40  | Normal up vs Off IS Tolerant   |
| 236377_PM_at    | TMEM132D               | transmembrane protein 132D                                              | 0.00147 | -1.22 | Normal down vs Off IS Tolerant |
| 212357_PM_at    | FAM168A                | family with sequence similarity 168, member A                           | 0.00148 | 1.43  | Normal up vs Off IS Tolerant   |
| 224192_PM_at    | FCRL2                  | Fc receptor-like 2                                                      | 0.00148 | -1.40 | Normal down vs Off IS Tolerant |
| 203564_PM_at    | FANCG                  | Fanconi anemia, complementation group G                                 | 0.00148 | 1.37  | Normal up vs Off IS Tolerant   |
| 206296_PM_x_at  | MAP4K1                 | mitogen-activated protein kinase kinase kinase kinase 1                 | 0.00148 | 1.47  | Normal up vs Off IS Tolerant   |
| 238686_PM_at    | FBXO3                  | F-box protein 3                                                         | 0.00148 | 1.47  | Normal up vs Off IS Tolerant   |
| 232617_PM_at    | CTSS                   | cathepsin S                                                             | 0.00148 | -1.28 | Normal down vs Off IS Tolerant |

|                 |                   |                                                      |         |       |                                |
|-----------------|-------------------|------------------------------------------------------|---------|-------|--------------------------------|
| 243560_PM_at    | ---               | ---                                                  | 0.00148 | 1.30  | Normal up vs Off IS Tolerant   |
| 217032_PM_at    | FOXD4 /// FOXD4L1 | forkhead box D4 /// forkhead box D4-like 1           | 0.00149 | -1.41 | Normal down vs Off IS Tolerant |
| 203773_PM_x_at  | BLVRA             | biliverdin reductase A                               | 0.00149 | -1.42 | Normal down vs Off IS Tolerant |
| 1598_PM_g_at    | GAS6              | growth arrest-specific 6                             | 0.00149 | -1.38 | Normal down vs Off IS Tolerant |
| 243766_PM_s_at  | TEAD2             | TEA domain family member 2                           | 0.00149 | -1.59 | Normal down vs Off IS Tolerant |
| 238959_PM_at    | LARP4             | La ribonucleoprotein domain family, member 4         | 0.00149 | -1.33 | Normal down vs Off IS Tolerant |
| 234344_PM_at    | LOC100288675      | Hypothetical protein LOC100288675                    | 0.00150 | 2.04  | Normal up vs Off IS Tolerant   |
| 233357_PM_at    | TRIM67            | tripartite motif-containing 67                       | 0.00150 | -1.47 | Normal down vs Off IS Tolerant |
| 244570_PM_at    | ---               | ---                                                  | 0.00150 | -1.27 | Normal down vs Off IS Tolerant |
| 232925_PM_at    | ---               | ---                                                  | 0.00150 | -1.41 | Normal down vs Off IS Tolerant |
| 222761_PM_at    | BIVM              | basic, immunoglobulin-like variable motif containing | 0.00150 | 1.53  | Normal up vs Off IS Tolerant   |
| 200706_PM_s_at  | LITAF             | lipopolysaccharide-induced TNF factor                | 0.00150 | 1.52  | Normal up vs Off IS Tolerant   |
| 226983_PM_at    | ZNF777            | zinc finger protein 777                              | 0.00150 | 1.29  | Normal up vs Off IS Tolerant   |
| 240592_PM_at    | LCORL             | ligand dependent nuclear receptor corepressor-like   | 0.00150 | -1.48 | Normal down vs Off IS Tolerant |
| 223135_PM_s_at  | BBX               | bobby sox homolog (Drosophila)                       | 0.00151 | 1.23  | Normal up vs Off IS Tolerant   |
| 1569973_PM_at   | SEPT7P2           | Septin 7 pseudogene 2                                | 0.00151 | 1.49  | Normal up vs Off IS Tolerant   |
| 224897_PM_at    | WDR26             | WD repeat domain 26                                  | 0.00151 | 1.31  | Normal up vs Off IS Tolerant   |
| 206955_PM_at    | AQP7              | aquaporin 7                                          | 0.00151 | -1.28 | Normal down vs Off IS Tolerant |
| 219554_PM_at    | RHCG              | Rh family, C glycoprotein                            | 0.00151 | -1.27 | Normal down vs Off IS Tolerant |
| 1567906_PM_at   | SOX4              | SRY (sex determining region Y)-box 4                 | 0.00151 | -1.48 | Normal down vs Off IS Tolerant |
| 1556988_PM_s_at | CHD1L             | chromodomain helicase DNA binding protein 1-like     | 0.00152 | 1.31  | Normal up vs Off IS Tolerant   |

|                 |                                 |                                                                                                |         |       |                                |
|-----------------|---------------------------------|------------------------------------------------------------------------------------------------|---------|-------|--------------------------------|
| 211606_PM_at    | ---                             | ---                                                                                            | 0.00152 | -1.21 | Normal down vs Off IS Tolerant |
| 225957_PM_at    | C5orf41                         | chromosome 5 open reading frame 41                                                             | 0.00152 | 1.37  | Normal up vs Off IS Tolerant   |
| 214676_PM_x_at  | MUC3A /// MUC3B                 | mucin 3A, cell surface associated ///<br>mucin 3B, cell surface associated                     | 0.00152 | -1.34 | Normal down vs Off IS Tolerant |
| 208899_PM_x_at  | ATP6V1D                         | ATPase, H+ transporting, lysosomal<br>34kDa, V1 subunit D                                      | 0.00153 | -1.67 | Normal down vs Off IS Tolerant |
| 209939_PM_x_at  | CFLAR                           | CASP8 and FADD-like apoptosis regulator                                                        | 0.00153 | 1.63  | Normal up vs Off IS Tolerant   |
| 1494_PM_f_at    | CYP2A6                          | cytochrome P450, family 2, subfamily A,<br>polypeptide 6                                       | 0.00153 | -1.22 | Normal down vs Off IS Tolerant |
| 218836_PM_at    | RPP21 /// TRIM39<br>/// TRIM39R | ribonuclease P/MRP 21kDa subunit ///<br>tripartite motif-containing 39 /// TRIM39-<br>like pro | 0.00153 | 1.23  | Normal up vs Off IS Tolerant   |
| 230110_PM_at    | MCOLN2                          | mucolipin 2                                                                                    | 0.00153 | 2.03  | Normal up vs Off IS Tolerant   |
| 59375_PM_at     | MYO15B                          | myosin XVB pseudogene                                                                          | 0.00153 | 1.53  | Normal up vs Off IS Tolerant   |
| 244787_PM_at    | ---                             | ---                                                                                            | 0.00153 | 1.77  | Normal up vs Off IS Tolerant   |
| 1552658_PM_a_at | NAV3                            | neuron navigator 3                                                                             | 0.00153 | -2.22 | Normal down vs Off IS Tolerant |
| 232753_PM_at    | ZNF346                          | zinc finger protein 346                                                                        | 0.00154 | 1.27  | Normal up vs Off IS Tolerant   |
| 230416_PM_at    | ---                             | ---                                                                                            | 0.00154 | 2.21  | Normal up vs Off IS Tolerant   |
| 201482_PM_at    | QSOX1                           | quiescin Q6 sulfhydryl oxidase 1                                                               | 0.00154 | -1.43 | Normal down vs Off IS Tolerant |
| 1552760_PM_at   | HDAC9                           | histone deacetylase 9                                                                          | 0.00155 | -1.37 | Normal down vs Off IS Tolerant |
| 214986_PM_x_at  | PPIL2                           | peptidylprolyl isomerase (cyclophilin)-<br>like 2                                              | 0.00155 | 1.39  | Normal up vs Off IS Tolerant   |
| 1561058_PM_at   | ---                             | ---                                                                                            | 0.00155 | -1.42 | Normal down vs Off IS Tolerant |
| 212080_PM_at    | MLL                             | myeloid/lymphoid or mixed-lineage<br>leukemia (trithorax homolog, Drosophila)                  | 0.00155 | 1.48  | Normal up vs Off IS Tolerant   |
| 205580_PM_s_at  | HRH1                            | histamine receptor H1                                                                          | 0.00155 | -1.22 | Normal down vs Off IS Tolerant |

|                 |                 |                                                                           |         |       |                                |
|-----------------|-----------------|---------------------------------------------------------------------------|---------|-------|--------------------------------|
| 202982_PM_s_at  | ACOT1 /// ACOT2 | acyl-CoA thioesterase 1 /// acyl-CoA thioesterase 2                       | 0.00155 | 1.72  | Normal up vs Off IS Tolerant   |
| 236787_PM_at    | LOC100507286    | hypothetical LOC100507286                                                 | 0.00155 | 1.49  | Normal up vs Off IS Tolerant   |
| 212066_PM_s_at  | USP34           | ubiquitin specific peptidase 34                                           | 0.00155 | 1.16  | Normal up vs Off IS Tolerant   |
| 242206_PM_at    | ---             | ---                                                                       | 0.00156 | 1.35  | Normal up vs Off IS Tolerant   |
| 229878_PM_at    | KIAA1731        | KIAA1731                                                                  | 0.00156 | 1.42  | Normal up vs Off IS Tolerant   |
| 213958_PM_at    | CD6             | CD6 molecule                                                              | 0.00156 | 1.75  | Normal up vs Off IS Tolerant   |
| 228478_PM_at    | ---             | ---                                                                       | 0.00156 | 1.88  | Normal up vs Off IS Tolerant   |
| 217000_PM_at    | ---             | ---                                                                       | 0.00156 | -1.29 | Normal down vs Off IS Tolerant |
| 230556_PM_at    | IMMP1L          | IMP1 inner mitochondrial membrane peptidase-like ( <i>S. cerevisiae</i> ) | 0.00156 | 1.31  | Normal up vs Off IS Tolerant   |
| 209599_PM_s_at  | PRUNE           | prune homolog ( <i>Drosophila</i> )                                       | 0.00157 | 1.54  | Normal up vs Off IS Tolerant   |
| 236728_PM_at    | LNPEP           | leucyl/cystinyl aminopeptidase                                            | 0.00157 | 1.63  | Normal up vs Off IS Tolerant   |
| 201639_PM_s_at  | CPSF1           | cleavage and polyadenylation specific factor 1, 160kDa                    | 0.00157 | 1.44  | Normal up vs Off IS Tolerant   |
| 236526_PM_x_at  | C5orf44         | chromosome 5 open reading frame 44                                        | 0.00157 | 1.67  | Normal up vs Off IS Tolerant   |
| 241742_PM_at    | PRAM1           | PML-RARA regulated adaptor molecule 1                                     | 0.00157 | -1.46 | Normal down vs Off IS Tolerant |
| 225187_PM_at    | KIAA1967        | KIAA1967                                                                  | 0.00157 | 1.23  | Normal up vs Off IS Tolerant   |
| 1569013_PM_s_at | LOC96610        | BMS1 homolog, ribosome assembly protein (yeast) pseudogene                | 0.00157 | -1.82 | Normal down vs Off IS Tolerant |
| 226648_PM_at    | HIF1AN          | hypoxia inducible factor 1, alpha subunit inhibitor                       | 0.00157 | 1.58  | Normal up vs Off IS Tolerant   |
| 219563_PM_at    | C14orf139       | chromosome 14 open reading frame 139                                      | 0.00158 | 1.30  | Normal up vs Off IS Tolerant   |
| 1560142_PM_at   | GRIK2           | glutamate receptor, ionotropic, kainate 2                                 | 0.00158 | -3.79 | Normal down vs Off IS Tolerant |
| 209625_PM_at    | PIGH            | phosphatidylinositol glycan anchor biosynthesis, class H                  | 0.00158 | 1.56  | Normal up vs Off IS Tolerant   |
| 200732_PM_s_at  | PTP4A1          | protein tyrosine phosphatase type IVA, member 1                           | 0.00158 | 1.50  | Normal up vs Off IS Tolerant   |
| 1556721_PM_at   | C20orf203       | chromosome 20 open reading frame 203                                      | 0.00158 | -1.24 | Normal down vs Off IS Tolerant |

|                |              |                                                                                  |         |       |                                |
|----------------|--------------|----------------------------------------------------------------------------------|---------|-------|--------------------------------|
| 208896_PM_at   | DDX18        | DEAD (Asp-Glu-Ala-Asp) box polypeptide 18                                        | 0.00158 | 1.41  | Normal up vs Off IS Tolerant   |
| 204235_PM_s_at | GULP1        | GULP, engulfment adaptor PTB domain containing 1                                 | 0.00158 | -1.30 | Normal down vs Off IS Tolerant |
| 1562509_PM_at  | ---          | ---                                                                              | 0.00158 | -1.42 | Normal down vs Off IS Tolerant |
| 1562434_PM_at  | UNK          | unkempt homolog (Drosophila)                                                     | 0.00158 | 1.31  | Normal up vs Off IS Tolerant   |
| 202408_PM_s_at | PRPF31       | PRP31 pre-mRNA processing factor 31 homolog (S. cerevisiae)                      | 0.00158 | 1.18  | Normal up vs Off IS Tolerant   |
| 239193_PM_at   | FUBP3        | far upstream element (FUSE) binding protein 3                                    | 0.00159 | 1.87  | Normal up vs Off IS Tolerant   |
| 228990_PM_at   | SNHG12       | small nucleolar RNA host gene 12 (non-protein coding)                            | 0.00159 | 1.63  | Normal up vs Off IS Tolerant   |
| 217124_PM_at   | IQCE         | IQ motif containing E                                                            | 0.00159 | -1.29 | Normal down vs Off IS Tolerant |
| 242766_PM_at   | ---          | ---                                                                              | 0.00159 | -3.39 | Normal down vs Off IS Tolerant |
| 220481_PM_at   | GPR75        | G protein-coupled receptor 75                                                    | 0.00159 | -1.24 | Normal down vs Off IS Tolerant |
| 241610_PM_x_at | ---          | ---                                                                              | 0.00159 | -1.43 | Normal down vs Off IS Tolerant |
| 225494_PM_at   | ---          | ---                                                                              | 0.00159 | 1.34  | Normal up vs Off IS Tolerant   |
| 1563089_PM_at  | LOC100287027 | Similar to hCG2038690                                                            | 0.00159 | -1.27 | Normal down vs Off IS Tolerant |
| 226310_PM_at   | RICTOR       | RPTOR independent companion of MTOR, complex 2                                   | 0.00160 | 1.81  | Normal up vs Off IS Tolerant   |
| 239813_PM_at   | IQCH         | IQ motif containing H                                                            | 0.00160 | -1.31 | Normal down vs Off IS Tolerant |
| 215047_PM_at   | TRIM58       | tripartite motif-containing 58                                                   | 0.00160 | 3.26  | Normal up vs Off IS Tolerant   |
| 208762_PM_at   | SUMO1        | SMT3 suppressor of mif two 3 homolog 1 (S. cerevisiae)                           | 0.00161 | 1.89  | Normal up vs Off IS Tolerant   |
| 234311_PM_s_at | GTPBP10      | GTP-binding protein 10 (putative)                                                | 0.00161 | 1.61  | Normal up vs Off IS Tolerant   |
| 243213_PM_at   | STAT3        | signal transducer and activator of transcription 3 (acute-phase response factor) | 0.00162 | 1.81  | Normal up vs Off IS Tolerant   |

|                |           |                                                       |         |       |                                |
|----------------|-----------|-------------------------------------------------------|---------|-------|--------------------------------|
| 205961_PM_s_at | PSIP1     | PC4 and SFRS1 interacting protein 1                   | 0.00162 | 1.62  | Normal up vs Off IS Tolerant   |
| 206361_PM_at   | GPR44     | G protein-coupled receptor 44                         | 0.00162 | -1.34 | Normal down vs Off IS Tolerant |
| 1557357_PM_at  | LOC440944 | hypothetical LOC440944                                | 0.00162 | -1.32 | Normal down vs Off IS Tolerant |
| 217117_PM_x_at | MUC3A     | mucin 3A, cell surface associated                     | 0.00162 | -1.39 | Normal down vs Off IS Tolerant |
| 230564_PM_at   | SIPA1L3   | Signal-induced proliferation-associated 1 like 3      | 0.00162 | -1.29 | Normal down vs Off IS Tolerant |
| 228439_PM_at   | BATF2     | basic leucine zipper transcription factor, ATF-like 2 | 0.00162 | -1.34 | Normal down vs Off IS Tolerant |
| 234150_PM_at   | ---       | ---                                                   | 0.00162 | 1.86  | Normal up vs Off IS Tolerant   |
| 242028_PM_at   | ZNF709    | zinc finger protein 709                               | 0.00163 | 1.47  | Normal up vs Off IS Tolerant   |
| 235291_PM_s_at | FLJ32255  | hypothetical LOC643977                                | 0.00163 | 1.82  | Normal up vs Off IS Tolerant   |
| 1558504_PM_at  | ---       | ---                                                   | 0.00163 | -1.51 | Normal down vs Off IS Tolerant |
| 216130_PM_at   | ---       | ---                                                   | 0.00163 | -1.26 | Normal down vs Off IS Tolerant |
| 240839_PM_at   | ---       | ---                                                   | 0.00163 | 1.58  | Normal up vs Off IS Tolerant   |
| 212553_PM_at   | RPRD2     | regulation of nuclear pre-mRNA domain containing 2    | 0.00164 | 1.34  | Normal up vs Off IS Tolerant   |
| 215497_PM_s_at | WDTC1     | WD and tetratricopeptide repeats 1                    | 0.00164 | 1.39  | Normal up vs Off IS Tolerant   |
| 206590_PM_x_at | DRD2      | dopamine receptor D2                                  | 0.00164 | -1.36 | Normal down vs Off IS Tolerant |
| 200780_PM_x_at | GNAS      | GNAS complex locus                                    | 0.00164 | 1.19  | Normal up vs Off IS Tolerant   |
| 211887_PM_x_at | MSR1      | macrophage scavenger receptor 1                       | 0.00164 | -1.27 | Normal down vs Off IS Tolerant |
| 1566693_PM_at  | ---       | ---                                                   | 0.00164 | -1.32 | Normal down vs Off IS Tolerant |
| 236072_PM_at   | ---       | ---                                                   | 0.00164 | 1.69  | Normal up vs Off IS Tolerant   |
| 233563_PM_s_at | CPSF3L    | cleavage and polyadenylation specific factor 3-like   | 0.00164 | 1.34  | Normal up vs Off IS Tolerant   |
| 204520_PM_x_at | BRD1      | bromodomain containing 1                              | 0.00165 | 1.69  | Normal up vs Off IS Tolerant   |
| 230729_PM_at   | ---       | ---                                                   | 0.00165 | 1.54  | Normal up vs Off IS Tolerant   |

|                |          |                                                            |         |       |                                |
|----------------|----------|------------------------------------------------------------|---------|-------|--------------------------------|
| 235165_PM_at   | PARD6B   | par-6 partitioning defective 6 homolog beta (C. elegans)   | 0.00165 | 1.31  | Normal up vs Off IS Tolerant   |
| 205353_PM_s_at | PEBP1    | phosphatidylethanolamine binding protein 1                 | 0.00165 | 1.37  | Normal up vs Off IS Tolerant   |
| 1560412_PM_at  | ---      | ---                                                        | 0.00165 | -1.34 | Normal down vs Off IS Tolerant |
| 1554776_PM_at  | ZFP42    | zinc finger protein 42 homolog (mouse)                     | 0.00165 | -1.30 | Normal down vs Off IS Tolerant |
| 223307_PM_at   | CDCA3    | cell division cycle associated 3                           | 0.00165 | -1.31 | Normal down vs Off IS Tolerant |
| 238640_PM_at   | C1orf212 | chromosome 1 open reading frame 212                        | 0.00165 | -1.24 | Normal down vs Off IS Tolerant |
| 239265_PM_at   | TMEM20   | transmembrane protein 20                                   | 0.00165 | 1.29  | Normal up vs Off IS Tolerant   |
| 202201_PM_at   | BLVRB    | biliverdin reductase B (flavin reductase (NADPH))          | 0.00165 | -1.67 | Normal down vs Off IS Tolerant |
| 213857_PM_s_at | CD47     | CD47 molecule                                              | 0.00165 | 1.14  | Normal up vs Off IS Tolerant   |
| 203305_PM_at   | F13A1    | coagulation factor XIII, A1 polypeptide                    | 0.00165 | 1.65  | Normal up vs Off IS Tolerant   |
| 231054_PM_at   | SPACA4   | sperm acrosome associated 4                                | 0.00165 | -1.23 | Normal down vs Off IS Tolerant |
| 206909_PM_at   | ---      | ---                                                        | 0.00166 | -1.30 | Normal down vs Off IS Tolerant |
| 221498_PM_at   | SNX27    | sorting nexin family member 27                             | 0.00166 | -1.55 | Normal down vs Off IS Tolerant |
| 209517_PM_s_at | ASH2L    | ash2 (absent, small, or homeotic)-like (Drosophila)        | 0.00166 | -1.41 | Normal down vs Off IS Tolerant |
| 226823_PM_at   | PHACTR4  | phosphatase and actin regulator 4                          | 0.00166 | 1.23  | Normal up vs Off IS Tolerant   |
| 238417_PM_at   | PGM2L1   | phosphoglucomutase 2-like 1                                | 0.00166 | 1.63  | Normal up vs Off IS Tolerant   |
| 229135_PM_at   | FASTKD2  | FAST kinase domains 2                                      | 0.00166 | 1.40  | Normal up vs Off IS Tolerant   |
| 237092_PM_at   | ---      | ---                                                        | 0.00166 | -1.37 | Normal down vs Off IS Tolerant |
| 1569253_PM_at  | INTS4    | integrator complex subunit 4                               | 0.00166 | 1.28  | Normal up vs Off IS Tolerant   |
| 240451_PM_at   | ---      | ---                                                        | 0.00166 | 1.87  | Normal up vs Off IS Tolerant   |
| 238125_PM_at   | ADAMTS16 | ADAM metallopeptidase with thrombospondin type 1 motif, 16 | 0.00166 | -1.24 | Normal down vs Off IS Tolerant |

|                 |           |                                                                                         |         |       |                                |
|-----------------|-----------|-----------------------------------------------------------------------------------------|---------|-------|--------------------------------|
| 209180_PM_at    | RABGGTB   | Rab geranylgeranyltransferase, beta subunit                                             | 0.00166 | 1.36  | Normal up vs Off IS Tolerant   |
| 229657_PM_at    | THRB      | thyroid hormone receptor, beta (erythroblastic leukemia viral (v-erb-a) oncogene homolo | 0.00167 | -1.21 | Normal down vs Off IS Tolerant |
| 210911_PM_at    | ID2B      | inhibitor of DNA binding 2B, dominant negative helix-loop-helix protein (pseudogene)    | 0.00167 | 1.22  | Normal up vs Off IS Tolerant   |
| 226665_PM_at    | AHSA2     | AHA1, activator of heat shock 90kDa protein ATPase homolog 2 (yeast)                    | 0.00167 | 2.16  | Normal up vs Off IS Tolerant   |
| 219189_PM_at    | FBXL6     | F-box and leucine-rich repeat protein 6                                                 | 0.00167 | 1.40  | Normal up vs Off IS Tolerant   |
| 201862_PM_s_at  | LRRFIP1   | leucine rich repeat (in FLII) interacting protein 1                                     | 0.00167 | 1.33  | Normal up vs Off IS Tolerant   |
| 230410_PM_at    | ---       | ---                                                                                     | 0.00167 | -1.34 | Normal down vs Off IS Tolerant |
| 223641_PM_at    | ---       | ---                                                                                     | 0.00168 | 1.69  | Normal up vs Off IS Tolerant   |
| 53720_PM_at     | C19orf66  | chromosome 19 open reading frame 66                                                     | 0.00168 | 1.27  | Normal up vs Off IS Tolerant   |
| 203278_PM_s_at  | PHF21A    | PHD finger protein 21A                                                                  | 0.00168 | -1.25 | Normal down vs Off IS Tolerant |
| 204336_PM_s_at  | RGS19     | regulator of G-protein signaling 19                                                     | 0.00169 | -1.33 | Normal down vs Off IS Tolerant |
| 210987_PM_x_at  | TPM1      | tropomyosin 1 (alpha)                                                                   | 0.00169 | 1.82  | Normal up vs Off IS Tolerant   |
| 205373_PM_at    | CTNNA2    | catenin (cadherin-associated protein), alpha 2                                          | 0.00169 | -1.70 | Normal down vs Off IS Tolerant |
| 225898_PM_at    | WDR54     | WD repeat domain 54                                                                     | 0.00169 | 1.42  | Normal up vs Off IS Tolerant   |
| 215023_PM_s_at  | PEX1      | peroxisomal biogenesis factor 1                                                         | 0.00169 | 1.60  | Normal up vs Off IS Tolerant   |
| 204593_PM_s_at  | SMCR7L    | Smith-Magenis syndrome chromosome region, candidate 7-like                              | 0.00169 | 1.63  | Normal up vs Off IS Tolerant   |
| 222939_PM_s_at  | SLC16A10  | solute carrier family 16, member 10 (aromatic amino acid transporter)                   | 0.00169 | 1.40  | Normal up vs Off IS Tolerant   |
| 221669_PM_s_at  | ACAD8     | acyl-CoA dehydrogenase family, member 8                                                 | 0.00169 | 1.53  | Normal up vs Off IS Tolerant   |
| 1552687_PM_a_at | C20orf152 | chromosome 20 open reading frame 152                                                    | 0.00170 | -1.24 | Normal down vs Off IS Tolerant |



|                 |           |                                                                                         |         |       |                                |
|-----------------|-----------|-----------------------------------------------------------------------------------------|---------|-------|--------------------------------|
| 242284_PM_at    | LOC199899 | hypothetical protein LOC199899                                                          | 0.00170 | -1.44 | Normal down vs Off IS Tolerant |
| 1556339_PM_a_at | ---       | ---                                                                                     | 0.00170 | 1.70  | Normal up vs Off IS Tolerant   |
| 236107_PM_at    | UBE2Z     | ubiquitin-conjugating enzyme E2Z                                                        | 0.00171 | 1.50  | Normal up vs Off IS Tolerant   |
| 214548_PM_x_at  | GNAS      | GNAS complex locus                                                                      | 0.00171 | 1.19  | Normal up vs Off IS Tolerant   |
| 226452_PM_at    | PDK1      | pyruvate dehydrogenase kinase, isozyme 1                                                | 0.00171 | 1.70  | Normal up vs Off IS Tolerant   |
| 1560469_PM_at   | NR5A2     | nuclear receptor subfamily 5, group A, member 2                                         | 0.00171 | -1.34 | Normal down vs Off IS Tolerant |
| 1566491_PM_at   | ---       | ---                                                                                     | 0.00171 | 1.59  | Normal up vs Off IS Tolerant   |
| 209708_PM_at    | MOXD1     | monooxygenase, DBH-like 1                                                               | 0.00171 | -1.50 | Normal down vs Off IS Tolerant |
| 227740_PM_at    | UHMK1     | U2AF homology motif (UHM) kinase 1                                                      | 0.00172 | -1.39 | Normal down vs Off IS Tolerant |
| 1554242_PM_a_at | COCH      | coagulation factor C homolog, cochlin (Limulus polyphemus)                              | 0.00172 | 1.39  | Normal up vs Off IS Tolerant   |
| 226681_PM_at    | ---       | ---                                                                                     | 0.00172 | -1.42 | Normal down vs Off IS Tolerant |
| 227668_PM_at    | C17orf56  | chromosome 17 open reading frame 56                                                     | 0.00172 | 1.36  | Normal up vs Off IS Tolerant   |
| 223949_PM_at    | TMPRSS3   | transmembrane protease, serine 3                                                        | 0.00172 | -1.38 | Normal down vs Off IS Tolerant |
| 220998_PM_s_at  | UNC93B1   | unc-93 homolog B1 (C. elegans)                                                          | 0.00172 | -1.37 | Normal down vs Off IS Tolerant |
| 213619_PM_at    | HNRNPH1   | Heterogeneous nuclear ribonucleoprotein H1 (H)                                          | 0.00172 | -1.43 | Normal down vs Off IS Tolerant |
| 221152_PM_at    | COL8A1    | collagen, type VIII, alpha 1                                                            | 0.00173 | -1.27 | Normal down vs Off IS Tolerant |
| 205240_PM_at    | GPSM2     | G-protein signaling modulator 2                                                         | 0.00173 | -1.27 | Normal down vs Off IS Tolerant |
| 200924_PM_s_at  | SLC3A2    | solute carrier family 3 (activators of dibasic and neutral amino acid transport), membe | 0.00173 | 1.35  | Normal up vs Off IS Tolerant   |
| 214744_PM_s_at  | RPL23     | ribosomal protein L23                                                                   | 0.00173 | 1.62  | Normal up vs Off IS Tolerant   |
| 241777_PM_x_at  | ---       | ---                                                                                     | 0.00173 | 1.56  | Normal up vs Off IS Tolerant   |

|                 |                  |                                                                                    |         |       |                                |
|-----------------|------------------|------------------------------------------------------------------------------------|---------|-------|--------------------------------|
| 236079_PM_at    | DKFZp667E0512    | hypothetical protein DKFZp667E0512                                                 | 0.00173 | 1.68  | Normal up vs Off IS Tolerant   |
| 216060_PM_s_at  | DAAM1            | dishevelled associated activator of morphogenesis 1                                | 0.00173 | 1.59  | Normal up vs Off IS Tolerant   |
| 229489_PM_at    | ---              | ---                                                                                | 0.00174 | -1.33 | Normal down vs Off IS Tolerant |
| 209337_PM_at    | PSIP1            | PC4 and SFRS1 interacting protein 1                                                | 0.00174 | 1.46  | Normal up vs Off IS Tolerant   |
| 202858_PM_at    | U2AF1            | U2 small nuclear RNA auxiliary factor 1                                            | 0.00174 | -1.30 | Normal down vs Off IS Tolerant |
| 218454_PM_at    | PLBD1            | phospholipase B domain containing 1                                                | 0.00174 | -1.67 | Normal down vs Off IS Tolerant |
| 201018_PM_at    | EIF1AX           | eukaryotic translation initiation factor 1A, X-linked                              | 0.00174 | 1.55  | Normal up vs Off IS Tolerant   |
| 216342_PM_x_at  | ---              | ---                                                                                | 0.00174 | 1.31  | Normal up vs Off IS Tolerant   |
| 243491_PM_at    | ---              | ---                                                                                | 0.00175 | 1.44  | Normal up vs Off IS Tolerant   |
| 1557141_PM_at   | AQP1 /// FAM188B | aquaporin 1 (Colton blood group) /// family with sequence similarity 188, member B | 0.00175 | -1.43 | Normal down vs Off IS Tolerant |
| 203086_PM_at    | KIF2A            | kinesin heavy chain member 2A                                                      | 0.00175 | 1.73  | Normal up vs Off IS Tolerant   |
| 1559992_PM_a_at | LOC100505967     | hypothetical LOC100505967                                                          | 0.00175 | -1.48 | Normal down vs Off IS Tolerant |
| 211893_PM_x_at  | CD6              | CD6 molecule                                                                       | 0.00175 | 1.56  | Normal up vs Off IS Tolerant   |
| 232596_PM_at    | DIAPH3           | diaphanous homolog 3 (Drosophila)                                                  | 0.00175 | -1.28 | Normal down vs Off IS Tolerant |
| 1552931_PM_a_at | PDE8A            | phosphodiesterase 8A                                                               | 0.00176 | 1.63  | Normal up vs Off IS Tolerant   |
| 1558094_PM_s_at | C3orf19          | chromosome 3 open reading frame 19                                                 | 0.00176 | 1.49  | Normal up vs Off IS Tolerant   |
| 215045_PM_at    | CELF3            | CUGBP, Elav-like family member 3                                                   | 0.00176 | -1.30 | Normal down vs Off IS Tolerant |
| 223614_PM_at    | MMP16            | matrix metalloproteinase 16 (membrane-inserted)                                    | 0.00177 | -1.46 | Normal down vs Off IS Tolerant |
| 1565306_PM_a_at | SLC8A1           | solute carrier family 8 (sodium/calcium exchanger), member 1                       | 0.00177 | -1.45 | Normal down vs Off IS Tolerant |
| 213627_PM_at    | MAGED2           | melanoma antigen family D, 2                                                       | 0.00177 | 1.20  | Normal up vs Off IS Tolerant   |
| 1569417_PM_at   | ---              | ---                                                                                | 0.00177 | -1.29 | Normal down vs Off IS Tolerant |

|                 |         |                                                                           |         |       |                                |
|-----------------|---------|---------------------------------------------------------------------------|---------|-------|--------------------------------|
| 226533_PM_at    | HINT3   | histidine triad nucleotide binding protein 3                              | 0.00177 | 1.67  | Normal up vs Off IS Tolerant   |
| 209917_PM_s_at  | TP53TG1 | TP53 target 1 (non-protein coding)                                        | 0.00177 | 1.61  | Normal up vs Off IS Tolerant   |
| 203959_PM_s_at  | ZBTB40  | zinc finger and BTB domain containing 40                                  | 0.00178 | 1.31  | Normal up vs Off IS Tolerant   |
| 238486_PM_at    | FRS2    | fibroblast growth factor receptor substrate 2                             | 0.00178 | 1.45  | Normal up vs Off IS Tolerant   |
| 205222_PM_at    | EHHADH  | enoyl-CoA, hydratase/3-hydroxyacyl CoA dehydrogenase                      | 0.00178 | -1.21 | Normal down vs Off IS Tolerant |
| 37966_PM_at     | PARVB   | parvin, beta                                                              | 0.00178 | 1.73  | Normal up vs Off IS Tolerant   |
| 1567628_PM_at   | CD74    | CD74 molecule, major histocompatibility complex, class II invariant chain | 0.00178 | -1.84 | Normal down vs Off IS Tolerant |
| 212550_PM_at    | STAT5B  | signal transducer and activator of transcription 5B                       | 0.00178 | 1.42  | Normal up vs Off IS Tolerant   |
| 203495_PM_at    | LRRC14  | leucine rich repeat containing 14                                         | 0.00178 | 1.27  | Normal up vs Off IS Tolerant   |
| 235058_PM_at    | ---     | ---                                                                       | 0.00179 | 1.48  | Normal up vs Off IS Tolerant   |
| 239988_PM_at    | ---     | ---                                                                       | 0.00179 | 1.51  | Normal up vs Off IS Tolerant   |
| 201511_PM_at    | AAMP    | angio-associated, migratory cell protein                                  | 0.00179 | -1.29 | Normal down vs Off IS Tolerant |
| 234021_PM_at    | EML2    | Echinoderm microtubule associated protein like 2                          | 0.00179 | -1.40 | Normal down vs Off IS Tolerant |
| 1552323_PM_s_at | FAM122C | family with sequence similarity 122C                                      | 0.00179 | 1.66  | Normal up vs Off IS Tolerant   |
| 225012_PM_at    | HDLBP   | high density lipoprotein binding protein                                  | 0.00180 | 1.35  | Normal up vs Off IS Tolerant   |
| 235601_PM_at    | ---     | ---                                                                       | 0.00180 | -1.77 | Normal down vs Off IS Tolerant |
| 204320_PM_at    | COL11A1 | collagen, type XI, alpha 1                                                | 0.00180 | -1.35 | Normal down vs Off IS Tolerant |
| 1570210_PM_x_at | PPP6R2  | protein phosphatase 6, regulatory subunit 2                               | 0.00180 | 1.57  | Normal up vs Off IS Tolerant   |
| 235581_PM_at    | ---     | ---                                                                       | 0.00180 | 1.47  | Normal up vs Off IS Tolerant   |
| 205333_PM_s_at  | RCE1    | RCE1 homolog, prenyl protein peptidase ( <i>S. cerevisiae</i> )           | 0.00180 | 1.27  | Normal up vs Off IS Tolerant   |
| 1558410_PM_s_at | ---     | ---                                                                       | 0.00180 | 1.78  | Normal up vs Off IS Tolerant   |

|                 |           |                                                                                         |         |       |                                |
|-----------------|-----------|-----------------------------------------------------------------------------------------|---------|-------|--------------------------------|
| 209680_PM_s_at  | KIFC1     | kinesin family member C1                                                                | 0.00180 | -1.33 | Normal down vs Off IS Tolerant |
| 238843_PM_at    | NPHP1     | nephronophthisis 1 (juvenile)                                                           | 0.00180 | -1.46 | Normal down vs Off IS Tolerant |
| 231779_PM_at    | IRAK2     | interleukin-1 receptor-associated kinase 2                                              | 0.00180 | 2.14  | Normal up vs Off IS Tolerant   |
| 1560282_PM_at   | ---       | ---                                                                                     | 0.00180 | -1.50 | Normal down vs Off IS Tolerant |
| 214909_PM_s_at  | DDAH2     | dimethylarginine dimethylaminohydrolase 2                                               | 0.00180 | -1.69 | Normal down vs Off IS Tolerant |
| 1555262_PM_a_at | MAGI1     | membrane associated guanylate kinase, WW and PDZ domain containing 1                    | 0.00181 | -1.39 | Normal down vs Off IS Tolerant |
| 226436_PM_at    | RASSF4    | Ras association (RalGDS/AF-6) domain family member 4                                    | 0.00181 | -1.55 | Normal down vs Off IS Tolerant |
| 202573_PM_at    | CSNK1G2   | casein kinase 1, gamma 2                                                                | 0.00181 | 1.19  | Normal up vs Off IS Tolerant   |
| 229262_PM_at    | LRRC68    | leucine rich repeat containing 68                                                       | 0.00181 | 1.28  | Normal up vs Off IS Tolerant   |
| 229218_PM_at    | COL1A2    | collagen, type I, alpha 2                                                               | 0.00181 | -1.63 | Normal down vs Off IS Tolerant |
| 236539_PM_at    | PTPN22    | protein tyrosine phosphatase, non-receptor type 22 (lymphoid)                           | 0.00181 | 1.64  | Normal up vs Off IS Tolerant   |
| 203089_PM_s_at  | HTRA2     | HtrA serine peptidase 2                                                                 | 0.00181 | 1.61  | Normal up vs Off IS Tolerant   |
| 228828_PM_at    | ---       | ---                                                                                     | 0.00181 | 1.58  | Normal up vs Off IS Tolerant   |
| 1556046_PM_a_at | LOC157627 | hypothetical LOC157627                                                                  | 0.00181 | -1.46 | Normal down vs Off IS Tolerant |
| 207405_PM_s_at  | RAD17     | RAD17 homolog (S. pombe)                                                                | 0.00181 | 1.46  | Normal up vs Off IS Tolerant   |
| 244065_PM_at    | LOC643792 | contactin associated protein-like 3 pseudogene                                          | 0.00182 | -1.64 | Normal down vs Off IS Tolerant |
| 1564339_PM_a_at | CHRM3     | cholinergic receptor, muscarinic 3                                                      | 0.00182 | -1.24 | Normal down vs Off IS Tolerant |
| 213566_PM_at    | RNASE6    | ribonuclease, RNase A family, k6                                                        | 0.00182 | -1.52 | Normal down vs Off IS Tolerant |
| 209910_PM_at    | SLC25A16  | solute carrier family 25 (mitochondrial carrier; Graves disease autoantigen), member 16 | 0.00182 | 1.24  | Normal up vs Off IS Tolerant   |

|                |                                                                                    |                                                                                        |         |       |                                |
|----------------|------------------------------------------------------------------------------------|----------------------------------------------------------------------------------------|---------|-------|--------------------------------|
| 220132_PM_s_at | CLEC2D                                                                             | C-type lectin domain family 2, member D                                                | 0.00183 | 1.83  | Normal up vs Off IS Tolerant   |
| 220035_PM_at   | NUP210                                                                             | nucleoporin 210kDa                                                                     | 0.00183 | 1.62  | Normal up vs Off IS Tolerant   |
| 215849_PM_x_at | TTC18                                                                              | tetratricopeptide repeat domain 18                                                     | 0.00183 | -1.62 | Normal down vs Off IS Tolerant |
| 1559578_PM_at  | ---                                                                                | ---                                                                                    | 0.00183 | -1.26 | Normal down vs Off IS Tolerant |
| 218446_PM_s_at | FAM18B1                                                                            | family with sequence similarity 18, member B1                                          | 0.00183 | 1.63  | Normal up vs Off IS Tolerant   |
| 216473_PM_x_at | DUX4 /// DUX4L2<br>/// DUX4L3 ///<br>DUX4L4 /// DUX4L5<br>/// DUX4L6 ///<br>DUX4L7 | double homeobox 4 /// double homeobox 4 like 2 /// double homeobox 4 like 3 /// double | 0.00183 | -1.56 | Normal down vs Off IS Tolerant |
| 229909_PM_at   | B4GALNT3                                                                           | beta-1,4-N-acetyl-galactosaminyl transferase 3                                         | 0.00183 | -1.28 | Normal down vs Off IS Tolerant |
| 241311_PM_at   | ---                                                                                | ---                                                                                    | 0.00183 | -1.32 | Normal down vs Off IS Tolerant |
| 205262_PM_at   | KCNH2                                                                              | potassium voltage-gated channel, subfamily H (eag-related), member 2                   | 0.00183 | 1.24  | Normal up vs Off IS Tolerant   |
| 235598_PM_at   | SMAD2                                                                              | SMAD family member 2                                                                   | 0.00184 | -1.52 | Normal down vs Off IS Tolerant |
| 218780_PM_at   | HOOK2                                                                              | hook homolog 2 (Drosophila)                                                            | 0.00184 | 1.37  | Normal up vs Off IS Tolerant   |
| 229922_PM_at   | GPRIN1                                                                             | G protein regulated inducer of neurite outgrowth 1                                     | 0.00184 | -1.23 | Normal down vs Off IS Tolerant |
| 238372_PM_s_at | ---                                                                                | ---                                                                                    | 0.00184 | -1.26 | Normal down vs Off IS Tolerant |
| 202792_PM_s_at | PPP6R2                                                                             | protein phosphatase 6, regulatory subunit 2                                            | 0.00184 | 1.39  | Normal up vs Off IS Tolerant   |
| 209221_PM_s_at | OSBPL2                                                                             | oxysterol binding protein-like 2                                                       | 0.00185 | 1.37  | Normal up vs Off IS Tolerant   |
| 226635_PM_at   | LOC401504                                                                          | hypothetical LOC401504                                                                 | 0.00185 | 1.34  | Normal up vs Off IS Tolerant   |
| 214760_PM_at   | ZNF337                                                                             | zinc finger protein 337                                                                | 0.00185 | 1.37  | Normal up vs Off IS Tolerant   |
| 237098_PM_at   | C1orf21                                                                            | Chromosome 1 open reading frame 21                                                     | 0.00185 | -1.26 | Normal down vs Off IS Tolerant |

|                 |                       |                                                                                         |         |       |                                |
|-----------------|-----------------------|-----------------------------------------------------------------------------------------|---------|-------|--------------------------------|
| 1556352_PM_at   | ---                   | ---                                                                                     | 0.00185 | -1.91 | Normal down vs Off IS Tolerant |
| 1557744_PM_at   | ---                   | ---                                                                                     | 0.00185 | 1.32  | Normal up vs Off IS Tolerant   |
| 220144_PM_s_at  | ANKRD5                | ankyrin repeat domain 5                                                                 | 0.00185 | 1.38  | Normal up vs Off IS Tolerant   |
| 233228_PM_at    | ---                   | ---                                                                                     | 0.00185 | -1.77 | Normal down vs Off IS Tolerant |
| 234906_PM_at    | ---                   | ---                                                                                     | 0.00186 | -2.52 | Normal down vs Off IS Tolerant |
| 232240_PM_at    | DNHD1                 | dynein heavy chain domain 1                                                             | 0.00186 | 1.38  | Normal up vs Off IS Tolerant   |
| 1569911_PM_at   | ---                   | ---                                                                                     | 0.00186 | -1.54 | Normal down vs Off IS Tolerant |
| 230156_PM_x_at  | CHD2                  | Chromodomain helicase DNA binding protein 2                                             | 0.00186 | 1.43  | Normal up vs Off IS Tolerant   |
| 222322_PM_at    | ---                   | ---                                                                                     | 0.00186 | -1.57 | Normal down vs Off IS Tolerant |
| 214803_PM_at    | CDH6                  | cadherin 6, type 2, K-cadherin (fetal kidney)                                           | 0.00186 | -2.25 | Normal down vs Off IS Tolerant |
| 204860_PM_s_at  | LOC100510692 /// NAIP | baculoviral IAP repeat-containing protein 1-like /// NLR family, apoptosis inhibitory p | 0.00186 | -1.68 | Normal down vs Off IS Tolerant |
| 208793_PM_x_at  | SMARCA4               | SWI/SNF related, matrix associated, actin dependent regulator of chromatin, subfamily a | 0.00187 | 1.57  | Normal up vs Off IS Tolerant   |
| 1568755_PM_a_at | ---                   | ---                                                                                     | 0.00187 | -1.27 | Normal down vs Off IS Tolerant |
| 227865_PM_at    | C9orf103              | chromosome 9 open reading frame 103                                                     | 0.00187 | 1.43  | Normal up vs Off IS Tolerant   |
| 210739_PM_x_at  | SLC4A4                | solute carrier family 4, sodium bicarbonate cotransporter, member 4                     | 0.00187 | -3.01 | Normal down vs Off IS Tolerant |
| 204377_PM_s_at  | VPRBP                 | Vpr (HIV-1) binding protein                                                             | 0.00187 | 1.34  | Normal up vs Off IS Tolerant   |
| 244703_PM_x_at  | IPO9                  | importin 9                                                                              | 0.00187 | 1.36  | Normal up vs Off IS Tolerant   |
| 225367_PM_at    | PGM2                  | phosphoglucomutase 2                                                                    | 0.00187 | -1.44 | Normal down vs Off IS Tolerant |
| 214908_PM_s_at  | TRRAP                 | transformation/transcription domain-associated protein                                  | 0.00187 | 1.54  | Normal up vs Off IS Tolerant   |

|                 |           |                                                                                         |         |       |                                |
|-----------------|-----------|-----------------------------------------------------------------------------------------|---------|-------|--------------------------------|
| 208752_PM_x_at  | NAP1L1    | nucleosome assembly protein 1-like 1                                                    | 0.00188 | 1.24  | Normal up vs Off IS Tolerant   |
| 1557823_PM_s_at | LOC401134 | hypothetical LOC401134                                                                  | 0.00188 | -1.26 | Normal down vs Off IS Tolerant |
| 218932_PM_at    | ZNHIT6    | zinc finger, HIT-type containing 6                                                      | 0.00188 | 1.60  | Normal up vs Off IS Tolerant   |
| 237333_PM_at    | RBBP4     | retinoblastoma binding protein 4                                                        | 0.00188 | 1.45  | Normal up vs Off IS Tolerant   |
| 243127_PM_x_at  | DNASE1    | deoxyribonuclease I                                                                     | 0.00189 | -1.34 | Normal down vs Off IS Tolerant |
| 51192_PM_at     | SSH3      | slingshot homolog 3 (Drosophila)                                                        | 0.00190 | -1.21 | Normal down vs Off IS Tolerant |
| 220180_PM_at    | CCDC68    | coiled-coil domain containing 68                                                        | 0.00190 | -1.50 | Normal down vs Off IS Tolerant |
| 224721_PM_at    | WDR75     | WD repeat domain 75                                                                     | 0.00190 | 1.51  | Normal up vs Off IS Tolerant   |
| 201432_PM_at    | CAT       | catalase                                                                                | 0.00190 | -1.36 | Normal down vs Off IS Tolerant |
| 238861_PM_at    | SSBP2     | single-stranded DNA binding protein 2                                                   | 0.00190 | 1.70  | Normal up vs Off IS Tolerant   |
| 212371_PM_at    | PPPDE1    | PPPDE peptidase domain containing 1                                                     | 0.00190 | 1.25  | Normal up vs Off IS Tolerant   |
| 241312_PM_at    | ---       | ---                                                                                     | 0.00190 | -1.51 | Normal down vs Off IS Tolerant |
| 38892_PM_at     | KIAA0240  | KIAA0240                                                                                | 0.00191 | 1.38  | Normal up vs Off IS Tolerant   |
| 210962_PM_s_at  | AKAP9     | A kinase (PRKA) anchor protein (yotiao) 9                                               | 0.00191 | 1.26  | Normal up vs Off IS Tolerant   |
| 242325_PM_at    | YWHAH     | Tyrosine 3-monooxygenase/tryptophan 5-monooxygenase activation protein, eta polypeptide | 0.00191 | 1.41  | Normal up vs Off IS Tolerant   |
| 213989_PM_x_at  | SETD4     | SET domain containing 4                                                                 | 0.00191 | 1.55  | Normal up vs Off IS Tolerant   |
| 1553211_PM_at   | ANKFN1    | ankyrin-repeat and fibronectin type III domain containing 1                             | 0.00191 | -1.29 | Normal down vs Off IS Tolerant |
| 1560439_PM_at   | LINGO3    | leucine rich repeat and Ig domain containing 3                                          | 0.00191 | -1.35 | Normal down vs Off IS Tolerant |
| 221428_PM_s_at  | TBL1XR1   | transducin (beta)-like 1 X-linked receptor 1                                            | 0.00191 | 1.48  | Normal up vs Off IS Tolerant   |
| 226838_PM_at    | TTC32     | tetratricopeptide repeat domain 32                                                      | 0.00191 | 1.43  | Normal up vs Off IS Tolerant   |
| 237319_PM_at    | C2orf53   | chromosome 2 open reading frame 53                                                      | 0.00191 | -1.26 | Normal down vs Off IS Tolerant |

|                 |                                                             |                                                                                               |         |       |                                |
|-----------------|-------------------------------------------------------------|-----------------------------------------------------------------------------------------------|---------|-------|--------------------------------|
| 1559623_PM_at   | C11orf54                                                    | Chromosome 11 open reading frame 54                                                           | 0.00192 | -1.66 | Normal down vs Off IS Tolerant |
| 1557146_PM_a_at | LOC146336                                                   | hypothetical LOC146336                                                                        | 0.00192 | -1.28 | Normal down vs Off IS Tolerant |
| 241644_PM_at    | BOLA2                                                       | bolA homolog 2 (E. coli)                                                                      | 0.00192 | -1.36 | Normal down vs Off IS Tolerant |
| 223669_PM_at    | HEMGN                                                       | hemogen                                                                                       | 0.00192 | 2.47  | Normal up vs Off IS Tolerant   |
| 218586_PM_at    | C20orf20                                                    | chromosome 20 open reading frame 20                                                           | 0.00193 | 1.57  | Normal up vs Off IS Tolerant   |
| 232342_PM_at    | MTMR14                                                      | myotubularin related protein 14                                                               | 0.00193 | 1.97  | Normal up vs Off IS Tolerant   |
| 208067_PM_x_at  | UTY                                                         | ubiquitously transcribed tetratricopeptide repeat gene, Y-linked                              | 0.00193 | -3.57 | Normal down vs Off IS Tolerant |
| 208730_PM_x_at  | RAB2A                                                       | RAB2A, member RAS oncogene family                                                             | 0.00193 | -1.55 | Normal down vs Off IS Tolerant |
| 203760_PM_s_at  | SLA                                                         | Src-like-adaptor                                                                              | 0.00193 | -1.36 | Normal down vs Off IS Tolerant |
| 1566269_PM_at   | RALGAPA1                                                    | Ral GTPase activating protein, alpha subunit 1 (catalytic)                                    | 0.00193 | -1.82 | Normal down vs Off IS Tolerant |
| 241846_PM_at    | ---                                                         | ---                                                                                           | 0.00193 | -1.34 | Normal down vs Off IS Tolerant |
| 220602_PM_s_at  | LOC388152 ///<br>LOC727751 ///<br>LOC727849 ///<br>LOC80154 | hypothetical LOC388152 /// hypothetical<br>LOC727751 /// golgin A2 pseudogene ///<br>hypothet | 0.00193 | 1.39  | Normal up vs Off IS Tolerant   |
| 201864_PM_at    | GDI1                                                        | GDP dissociation inhibitor 1                                                                  | 0.00193 | 1.28  | Normal up vs Off IS Tolerant   |
| 221593_PM_s_at  | RPL31                                                       | ribosomal protein L31                                                                         | 0.00193 | 1.37  | Normal up vs Off IS Tolerant   |
| 226901_PM_at    | C17orf58                                                    | chromosome 17 open reading frame 58                                                           | 0.00193 | 1.70  | Normal up vs Off IS Tolerant   |
| 1557567_PM_a_at | LOC100507634 ///<br>LOC148987                               | hypothetical LOC100507634 ///<br>hypothetical protein LOC148987                               | 0.00194 | 1.27  | Normal up vs Off IS Tolerant   |
| 241464_PM_s_at  | LOC400931                                                   | hypothetical LOC400931                                                                        | 0.00194 | -1.21 | Normal down vs Off IS Tolerant |
| 216014_PM_s_at  | ZXDA /// ZXDB                                               | zinc finger, X-linked, duplicated A /// zinc<br>finger, X-linked, duplicated B                | 0.00194 | 1.27  | Normal up vs Off IS Tolerant   |



|                |              |                                                                    |         |       |                                |
|----------------|--------------|--------------------------------------------------------------------|---------|-------|--------------------------------|
| 201834_PM_at   | PRKAB1       | protein kinase, AMP-activated, beta 1 non-catalytic subunit        | 0.00194 | 1.31  | Normal up vs Off IS Tolerant   |
| 209977_PM_at   | PLG          | plasminogen                                                        | 0.00195 | -1.26 | Normal down vs Off IS Tolerant |
| 221645_PM_s_at | ZNF83        | zinc finger protein 83                                             | 0.00195 | 1.57  | Normal up vs Off IS Tolerant   |
| 224480_PM_s_at | AGPAT9       | 1-acylglycerol-3-phosphate O-acyltransferase 9                     | 0.00195 | -1.71 | Normal down vs Off IS Tolerant |
| 214634_PM_at   | ---          | ---                                                                | 0.00195 | -1.38 | Normal down vs Off IS Tolerant |
| 225820_PM_at   | PHF17        | PHD finger protein 17                                              | 0.00196 | 1.52  | Normal up vs Off IS Tolerant   |
| 220935_PM_s_at | CDK5RAP2     | CDK5 regulatory subunit associated protein 2                       | 0.00196 | 1.34  | Normal up vs Off IS Tolerant   |
| 205670_PM_at   | GAL3ST1      | galactose-3-O-sulfotransferase 1                                   | 0.00196 | -1.21 | Normal down vs Off IS Tolerant |
| 218067_PM_s_at | ARGLU1       | arginine and glutamate rich 1                                      | 0.00196 | 1.23  | Normal up vs Off IS Tolerant   |
| 215657_PM_at   | SLC26A3      | Solute carrier family 26, member 3                                 | 0.00196 | -1.46 | Normal down vs Off IS Tolerant |
| 242627_PM_at   | ---          | ---                                                                | 0.00196 | -1.30 | Normal down vs Off IS Tolerant |
| 236149_PM_at   | ---          | ---                                                                | 0.00196 | 1.42  | Normal up vs Off IS Tolerant   |
| 229418_PM_at   | C17orf63     | chromosome 17 open reading frame 63                                | 0.00196 | 1.24  | Normal up vs Off IS Tolerant   |
| 212995_PM_x_at | MZT2B        | mitotic spindle organizing protein 2B                              | 0.00197 | 1.33  | Normal up vs Off IS Tolerant   |
| 226137_PM_at   | ZFHX3        | zinc finger homeobox 3                                             | 0.00197 | -1.48 | Normal down vs Off IS Tolerant |
| 208332_PM_at   | PRY /// PRY2 | PTPN13-like, Y-linked /// PTPN13-like, Y-linked 2                  | 0.00197 | -1.58 | Normal down vs Off IS Tolerant |
| 219502_PM_at   | NEIL3        | nei endonuclease VIII-like 3 (E. coli)                             | 0.00197 | -1.62 | Normal down vs Off IS Tolerant |
| 205669_PM_at   | NCAM2        | neural cell adhesion molecule 2                                    | 0.00198 | -1.84 | Normal down vs Off IS Tolerant |
| 1552952_PM_at  | RBMV2FP      | RNA binding motif protein, Y-linked, family 2, member F pseudogene | 0.00198 | -1.48 | Normal down vs Off IS Tolerant |
| 239248_PM_at   | ---          | ---                                                                | 0.00198 | -1.29 | Normal down vs Off IS Tolerant |

|                |                         |                                                                                          |         |       |                                |
|----------------|-------------------------|------------------------------------------------------------------------------------------|---------|-------|--------------------------------|
| 201074_PM_at   | SMARCC1                 | SWI/SNF related, matrix associated, actin dependent regulator of chromatin, subfamily c  | 0.00198 | 1.27  | Normal up vs Off IS Tolerant   |
| 1561606_PM_at  | ---                     | ---                                                                                      | 0.00198 | -1.33 | Normal down vs Off IS Tolerant |
| 221375_PM_at   | OR1G1                   | olfactory receptor, family 1, subfamily G, member 1                                      | 0.00199 | -1.21 | Normal down vs Off IS Tolerant |
| 204279_PM_at   | PSMB9                   | proteasome (prosome, macropain) subunit, beta type, 9 (large multifunctional peptidase)  | 0.00199 | -1.39 | Normal down vs Off IS Tolerant |
| 211632_PM_at   | IGHD /// IGHG1 /// IGHM | immunoglobulin heavy constant delta /// immunoglobulin heavy constant gamma 1 (G1m mark) | 0.00199 | -1.23 | Normal down vs Off IS Tolerant |
| 220130_PM_x_at | LTB4R2                  | leukotriene B4 receptor 2                                                                | 0.00199 | -1.29 | Normal down vs Off IS Tolerant |
| 223075_PM_s_at | AIF1L                   | allograft inflammatory factor 1-like                                                     | 0.00200 | -1.28 | Normal down vs Off IS Tolerant |
| 1561473_PM_at  | ---                     | ---                                                                                      | 0.00200 | -1.65 | Normal down vs Off IS Tolerant |
| 203969_PM_at   | PEX3                    | peroxisomal biogenesis factor 3                                                          | 0.00201 | 1.39  | Normal up vs Off IS Tolerant   |
| 224239_PM_at   | DEFB103A /// DEFB103B   | defensin, beta 103A /// defensin, beta 103B                                              | 0.00201 | -1.44 | Normal down vs Off IS Tolerant |
| 238127_PM_at   | FLJ41484                | hypothetical LOC650669                                                                   | 0.00201 | 1.77  | Normal up vs Off IS Tolerant   |
| 201873_PM_s_at | ABCE1                   | ATP-binding cassette, sub-family E (OABP), member 1                                      | 0.00201 | 1.37  | Normal up vs Off IS Tolerant   |
| 225642_PM_at   | KTI12                   | KTI12 homolog, chromatin associated (S. cerevisiae)                                      | 0.00202 | 1.66  | Normal up vs Off IS Tolerant   |
| 215841_PM_at   | GUCA1B                  | guanylate cyclase activator 1B (retina)                                                  | 0.00202 | -1.31 | Normal down vs Off IS Tolerant |
| 231963_PM_at   | ANKRD33B                | ankyrin repeat domain 33B                                                                | 0.00202 | 1.67  | Normal up vs Off IS Tolerant   |
| 1567611_PM_at  | ---                     | ---                                                                                      | 0.00202 | -1.50 | Normal down vs Off IS Tolerant |
| 1553166_PM_at  | CDH24                   | cadherin 24, type 2                                                                      | 0.00202 | -1.35 | Normal down vs Off IS Tolerant |

|                 |                                     |                                                                                         |         |       |                                |
|-----------------|-------------------------------------|-----------------------------------------------------------------------------------------|---------|-------|--------------------------------|
| 236063_PM_at    | ---                                 | ---                                                                                     | 0.00202 | -1.25 | Normal down vs Off IS Tolerant |
| 234053_PM_at    | ---                                 | ---                                                                                     | 0.00202 | -1.30 | Normal down vs Off IS Tolerant |
| 1558304_PM_s_at | TSEN54                              | tRNA splicing endonuclease 54 homolog (S. cerevisiae)                                   | 0.00202 | 1.46  | Normal up vs Off IS Tolerant   |
| 208498_PM_s_at  | AMY1A /// AMY1B /// AMY1C /// AMY2A | amylase, alpha 1A (salivary) /// amylase, alpha 1B (salivary) /// amylase, alpha 1C (sa | 0.00202 | 1.47  | Normal up vs Off IS Tolerant   |
| 224370_PM_s_at  | CAPS2                               | calcyphosine 2                                                                          | 0.00203 | -1.55 | Normal down vs Off IS Tolerant |
| 222346_PM_at    | LAMA1                               | laminin, alpha 1                                                                        | 0.00203 | -1.25 | Normal down vs Off IS Tolerant |
| 205859_PM_at    | LY86                                | lymphocyte antigen 86                                                                   | 0.00203 | -1.46 | Normal down vs Off IS Tolerant |
| 212247_PM_at    | NUP205                              | nucleoporin 205kDa                                                                      | 0.00204 | 1.26  | Normal up vs Off IS Tolerant   |
| 232556_PM_at    | ---                                 | ---                                                                                     | 0.00204 | -1.88 | Normal down vs Off IS Tolerant |
| 202840_PM_at    | TAF15                               | TAF15 RNA polymerase II, TATA box binding protein (TBP)-associated factor, 68kDa        | 0.00204 | -1.30 | Normal down vs Off IS Tolerant |
| 225353_PM_s_at  | C1QC                                | complement component 1, q subcomponent, C chain                                         | 0.00204 | -1.42 | Normal down vs Off IS Tolerant |
| 1563706_PM_at   | ---                                 | ---                                                                                     | 0.00204 | -1.46 | Normal down vs Off IS Tolerant |
| 210844_PM_x_at  | CTNNA1                              | catenin (cadherin-associated protein), alpha 1, 102kDa                                  | 0.00205 | -1.36 | Normal down vs Off IS Tolerant |
| 207834_PM_at    | FBLN1                               | fibulin 1                                                                               | 0.00205 | -1.26 | Normal down vs Off IS Tolerant |
| 209918_PM_at    | GGTLC2                              | gamma-glutamyltransferase light chain 2                                                 | 0.00205 | -1.31 | Normal down vs Off IS Tolerant |
| 244425_PM_at    | ---                                 | ---                                                                                     | 0.00205 | 1.81  | Normal up vs Off IS Tolerant   |
| 209006_PM_s_at  | C1orf63                             | chromosome 1 open reading frame 63                                                      | 0.00205 | 1.66  | Normal up vs Off IS Tolerant   |
| 213660_PM_s_at  | TOP3B                               | topoisomerase (DNA) III beta                                                            | 0.00205 | 1.46  | Normal up vs Off IS Tolerant   |

|                 |                                        |                                                                                        |         |       |                                |
|-----------------|----------------------------------------|----------------------------------------------------------------------------------------|---------|-------|--------------------------------|
| 218719_PM_s_at  | GIN53                                  | GIN5 complex subunit 3 (Psf3 homolog)                                                  | 0.00206 | -1.42 | Normal down vs Off IS Tolerant |
| 229002_PM_at    | FAM69B                                 | family with sequence similarity 69, member B                                           | 0.00206 | 1.50  | Normal up vs Off IS Tolerant   |
| 244614_PM_at    | TFG                                    | TRK-fused gene                                                                         | 0.00206 | -1.62 | Normal down vs Off IS Tolerant |
| 235347_PM_at    | LRCH3                                  | leucine-rich repeats and calponin homology (CH) domain containing 3                    | 0.00206 | 1.94  | Normal up vs Off IS Tolerant   |
| 243693_PM_at    | ---                                    | ---                                                                                    | 0.00206 | -1.33 | Normal down vs Off IS Tolerant |
| 201345_PM_s_at  | UBE2D2                                 | ubiquitin-conjugating enzyme E2D 2 (UBC4/5 homolog, yeast)                             | 0.00206 | 1.22  | Normal up vs Off IS Tolerant   |
| 224114_PM_at    | ---                                    | ---                                                                                    | 0.00206 | -1.81 | Normal down vs Off IS Tolerant |
| 243970_PM_at    | LOC100130642                           | hypothetical LOC100130642                                                              | 0.00206 | -1.28 | Normal down vs Off IS Tolerant |
| 230018_PM_at    | DPP9                                   | dipeptidyl-peptidase 9                                                                 | 0.00206 | 1.25  | Normal up vs Off IS Tolerant   |
| 205238_PM_at    | TRMT2B                                 | TRM2 tRNA methyltransferase 2 homolog B (S. cerevisiae)                                | 0.00206 | 1.37  | Normal up vs Off IS Tolerant   |
| 234369_PM_at    | OR4F16 /// OR4F21 /// OR4F29 /// OR4F3 | olfactory receptor, family 4, subfamily F, member 16 /// olfactory receptor, family 4, | 0.00206 | -3.08 | Normal down vs Off IS Tolerant |
| 1553234_PM_at   | ADAMTS18                               | ADAM metallopeptidase with thrombospondin type 1 motif, 18                             | 0.00207 | 1.25  | Normal up vs Off IS Tolerant   |
| 222990_PM_at    | UBQLN1                                 | ubiquilin 1                                                                            | 0.00207 | 1.20  | Normal up vs Off IS Tolerant   |
| 205973_PM_at    | FEZ1                                   | fasciculation and elongation protein zeta 1 (zygin I)                                  | 0.00207 | -1.24 | Normal down vs Off IS Tolerant |
| 1557283_PM_a_at | ZNF519                                 | zinc finger protein 519                                                                | 0.00207 | -1.58 | Normal down vs Off IS Tolerant |
| 212326_PM_at    | VPS13D                                 | vacuolar protein sorting 13 homolog D (S. cerevisiae)                                  | 0.00207 | 1.45  | Normal up vs Off IS Tolerant   |
| 1563975_PM_at   | RNF130                                 | Ring finger protein 130                                                                | 0.00207 | -1.58 | Normal down vs Off IS Tolerant |
| 206786_PM_at    | HTN3                                   | histatin 3                                                                             | 0.00208 | -1.42 | Normal down vs Off IS Tolerant |

|                 |              |                                                                                         |         |       |                                |
|-----------------|--------------|-----------------------------------------------------------------------------------------|---------|-------|--------------------------------|
| 212914_PM_at    | CBX7         | chromobox homolog 7                                                                     | 0.00208 | 1.42  | Normal up vs Off IS Tolerant   |
| 216788_PM_at    | ---          | ---                                                                                     | 0.00208 | -1.41 | Normal down vs Off IS Tolerant |
| 207760_PM_s_at  | NCOR2        | nuclear receptor corepressor 2                                                          | 0.00208 | 1.28  | Normal up vs Off IS Tolerant   |
| 1555220_PM_a_at | AKR1E2       | aldo-keto reductase family 1, member E2                                                 | 0.00208 | 1.22  | Normal up vs Off IS Tolerant   |
| 1569354_PM_at   | NSUN6        | NOP2/Sun domain family, member 6                                                        | 0.00208 | 1.64  | Normal up vs Off IS Tolerant   |
| 226252_PM_at    | ---          | ---                                                                                     | 0.00209 | 1.37  | Normal up vs Off IS Tolerant   |
| 213880_PM_at    | LGR5         | leucine-rich repeat-containing G protein-coupled receptor 5                             | 0.00209 | -1.57 | Normal down vs Off IS Tolerant |
| 1552386_PM_at   | GAPT         | GRB2-binding adaptor protein, transmembrane                                             | 0.00209 | -2.27 | Normal down vs Off IS Tolerant |
| 212454_PM_x_at  | HNRPDL       | heterogeneous nuclear ribonucleoprotein D-like                                          | 0.00209 | 1.36  | Normal up vs Off IS Tolerant   |
| 239152_PM_at    | ---          | ---                                                                                     | 0.00210 | -1.39 | Normal down vs Off IS Tolerant |
| 1557710_PM_at   | ---          | ---                                                                                     | 0.00210 | -1.60 | Normal down vs Off IS Tolerant |
| 244079_PM_at    | LOC100129335 | leucine-rich repeat-containing protein ENSP00000371558                                  | 0.00210 | -1.24 | Normal down vs Off IS Tolerant |
| 206938_PM_at    | SRD5A2       | steroid-5-alpha-reductase, alpha polypeptide 2 (3-oxo-5 alpha-steroid delta 4-dehydroge | 0.00210 | -1.26 | Normal down vs Off IS Tolerant |
| 222881_PM_at    | HPSE         | heparanase                                                                              | 0.00210 | -1.72 | Normal down vs Off IS Tolerant |
| 206139_PM_at    | PI4KB        | phosphatidylinositol 4-kinase, catalytic, beta                                          | 0.00210 | 1.24  | Normal up vs Off IS Tolerant   |
| 231146_PM_at    | FAM24B       | family with sequence similarity 24, member B                                            | 0.00211 | 1.44  | Normal up vs Off IS Tolerant   |
| 244462_PM_at    | ZNF224       | zinc finger protein 224                                                                 | 0.00211 | 1.52  | Normal up vs Off IS Tolerant   |
| 233221_PM_at    | DEFB118      | defensin, beta 118                                                                      | 0.00211 | -1.29 | Normal down vs Off IS Tolerant |
| 223801_PM_s_at  | APOL4        | apolipoprotein L, 4                                                                     | 0.00211 | -1.32 | Normal down vs Off IS Tolerant |

|                 |              |                                                                  |         |       |                                |
|-----------------|--------------|------------------------------------------------------------------|---------|-------|--------------------------------|
| 232275_PM_s_at  | HS6ST3       | heparan sulfate 6-O-sulfotransferase 3                           | 0.00211 | -1.29 | Normal down vs Off IS Tolerant |
| 243275_PM_at    | ---          | ---                                                              | 0.00211 | -1.39 | Normal down vs Off IS Tolerant |
| 241323_PM_at    | ---          | ---                                                              | 0.00211 | -1.44 | Normal down vs Off IS Tolerant |
| 241211_PM_at    | ---          | ---                                                              | 0.00211 | -1.21 | Normal down vs Off IS Tolerant |
| 217533_PM_x_at  | ---          | ---                                                              | 0.00211 | -1.26 | Normal down vs Off IS Tolerant |
| 203403_PM_s_at  | RNF6         | ring finger protein (C3H2C3 type) 6                              | 0.00211 | 1.41  | Normal up vs Off IS Tolerant   |
| 232161_PM_x_at  | ---          | ---                                                              | 0.00212 | 1.62  | Normal up vs Off IS Tolerant   |
| 219093_PM_at    | PID1         | phosphotyrosine interaction domain containing 1                  | 0.00212 | -2.11 | Normal down vs Off IS Tolerant |
| 211946_PM_s_at  | BAT2L2       | HLA-B associated transcript 2-like 2                             | 0.00212 | 1.18  | Normal up vs Off IS Tolerant   |
| 1569688_PM_at   | FMO5         | flavin containing monooxygenase 5                                | 0.00212 | -1.39 | Normal down vs Off IS Tolerant |
| 228370_PM_at    | LOC100506948 | hypothetical LOC100506948                                        | 0.00213 | 1.61  | Normal up vs Off IS Tolerant   |
| 219346_PM_at    | LRFN3        | leucine rich repeat and fibronectin type III domain containing 3 | 0.00213 | 1.27  | Normal up vs Off IS Tolerant   |
| 1556047_PM_s_at | MAGEE1       | melanoma antigen family E, 1                                     | 0.00213 | 1.59  | Normal up vs Off IS Tolerant   |
| 230529_PM_at    | HECA         | headcase homolog (Drosophila)                                    | 0.00213 | 1.47  | Normal up vs Off IS Tolerant   |
| 204080_PM_at    | TOE1         | target of EGR1, member 1 (nuclear)                               | 0.00213 | 1.45  | Normal up vs Off IS Tolerant   |
| 214911_PM_s_at  | BRD2         | bromodomain containing 2                                         | 0.00214 | 1.16  | Normal up vs Off IS Tolerant   |
| 218232_PM_at    | C1QA         | complement component 1, q subcomponent, A chain                  | 0.00214 | -1.81 | Normal down vs Off IS Tolerant |
| 213676_PM_at    | TMEM151B     | transmembrane protein 151B                                       | 0.00214 | -1.40 | Normal down vs Off IS Tolerant |
| 239391_PM_at    | FAM120AOS    | Family with sequence similarity 120A opposite strand             | 0.00214 | 1.45  | Normal up vs Off IS Tolerant   |
| 230483_PM_at    | ---          | ---                                                              | 0.00215 | 1.45  | Normal up vs Off IS Tolerant   |
| 216460_PM_at    | LOC100288594 | hypothetical LOC100288594                                        | 0.00215 | -1.34 | Normal down vs Off IS Tolerant |
| 244616_PM_x_at  | MDM2         | Mdm2 p53 binding protein homolog (mouse)                         | 0.00215 | -1.54 | Normal down vs Off IS Tolerant |

|                |                 |                                                                                                  |         |       |                                |
|----------------|-----------------|--------------------------------------------------------------------------------------------------|---------|-------|--------------------------------|
| 213185_PM_at   | KIAA0556        | KIAA0556                                                                                         | 0.00215 | 1.42  | Normal up vs Off IS Tolerant   |
| 201534_PM_s_at | UBL3            | ubiquitin-like 3                                                                                 | 0.00215 | 1.50  | Normal up vs Off IS Tolerant   |
| 210817_PM_s_at | CALCOCO2        | calcium binding and coiled-coil domain 2                                                         | 0.00216 | -1.22 | Normal down vs Off IS Tolerant |
| 234548_PM_at   | ---             | ---                                                                                              | 0.00216 | -1.29 | Normal down vs Off IS Tolerant |
| 207514_PM_s_at | GNAT1           | guanine nucleotide binding protein (G protein), alpha transducing activity polypeptide           | 0.00216 | -1.24 | Normal down vs Off IS Tolerant |
| 241784_PM_x_at | HELQ            | helicase, POLQ-like                                                                              | 0.00217 | -1.92 | Normal down vs Off IS Tolerant |
| 238334_PM_at   | SPRN            | Shadow of prion protein homolog (zebrafish)                                                      | 0.00217 | -1.31 | Normal down vs Off IS Tolerant |
| 221206_PM_at   | PMS2 /// PMS2CL | PMS2 postmeiotic segregation increased 2 ( <i>S. cerevisiae</i> ) /// PMS2 C-terminal like pseud | 0.00217 | 1.39  | Normal up vs Off IS Tolerant   |
| 201852_PM_x_at | COL3A1          | collagen, type III, alpha 1                                                                      | 0.00217 | -1.34 | Normal down vs Off IS Tolerant |
| 243608_PM_at   | COG2            | component of oligomeric golgi complex 2                                                          | 0.00217 | 1.33  | Normal up vs Off IS Tolerant   |
| 209299_PM_x_at | PPIL2           | peptidylprolyl isomerase (cyclophilin)-like 2                                                    | 0.00218 | 1.35  | Normal up vs Off IS Tolerant   |
| 1561132_PM_at  | DHX35           | DEAH (Asp-Glu-Ala-His) box polypeptide 35                                                        | 0.00218 | -1.25 | Normal down vs Off IS Tolerant |
| 205608_PM_s_at | ANGPT1          | angiopoietin 1                                                                                   | 0.00218 | -1.32 | Normal down vs Off IS Tolerant |
| 206678_PM_at   | GABRA1          | gamma-aminobutyric acid (GABA) A receptor, alpha 1                                               | 0.00218 | -1.60 | Normal down vs Off IS Tolerant |
| 208139_PM_s_at | ---             | ---                                                                                              | 0.00219 | -1.32 | Normal down vs Off IS Tolerant |
| 214221_PM_at   | ALMS1           | Alstrom syndrome 1                                                                               | 0.00219 | 1.45  | Normal up vs Off IS Tolerant   |
| 238206_PM_at   | RXFP1           | relaxin/insulin-like family peptide receptor 1                                                   | 0.00219 | -1.25 | Normal down vs Off IS Tolerant |
| 1563860_PM_at  | LOC400965       | hypothetical LOC400965                                                                           | 0.00219 | -1.20 | Normal down vs Off IS Tolerant |

|                |           |                                                                                |         |       |                                |
|----------------|-----------|--------------------------------------------------------------------------------|---------|-------|--------------------------------|
| 203527_PM_s_at | APC       | adenomatous polyposis coli                                                     | 0.00219 | -1.20 | Normal down vs Off IS Tolerant |
| 202152_PM_x_at | USF2      | upstream transcription factor 2, c-fos interacting                             | 0.00220 | 1.28  | Normal up vs Off IS Tolerant   |
| 213777_PM_s_at | ---       | ---                                                                            | 0.00220 | -1.27 | Normal down vs Off IS Tolerant |
| 218641_PM_at   | C11orf95  | chromosome 11 open reading frame 95                                            | 0.00220 | 1.32  | Normal up vs Off IS Tolerant   |
| 215922_PM_at   | REPS1     | RALBP1 associated Eps domain containing 1                                      | 0.00220 | 1.30  | Normal up vs Off IS Tolerant   |
| 214364_PM_at   | MTERFD2   | MTERF domain containing 2                                                      | 0.00220 | 1.57  | Normal up vs Off IS Tolerant   |
| 204219_PM_s_at | PSMC1     | proteasome (prosome, macropain) 26S subunit, ATPase, 1                         | 0.00221 | -1.14 | Normal down vs Off IS Tolerant |
| 240633_PM_at   | DOK7      | docking protein 7                                                              | 0.00221 | 1.33  | Normal up vs Off IS Tolerant   |
| 1555212_PM_at  | OR8B8     | olfactory receptor, family 8, subfamily B, member 8                            | 0.00221 | -1.30 | Normal down vs Off IS Tolerant |
| 218386_PM_x_at | USP16     | ubiquitin specific peptidase 16                                                | 0.00221 | 1.37  | Normal up vs Off IS Tolerant   |
| 218632_PM_at   | HECTD3    | HECT domain containing 3                                                       | 0.00222 | 1.37  | Normal up vs Off IS Tolerant   |
| 213980_PM_s_at | CTBP1     | C-terminal binding protein 1                                                   | 0.00222 | 1.22  | Normal up vs Off IS Tolerant   |
| 211383_PM_s_at | WDR37     | WD repeat domain 37                                                            | 0.00222 | 1.23  | Normal up vs Off IS Tolerant   |
| 223179_PM_at   | YPEL3     | yippee-like 3 (Drosophila)                                                     | 0.00222 | 1.42  | Normal up vs Off IS Tolerant   |
| 230974_PM_at   | DDX19B    | DEAD (Asp-Glu-Ala-As) box polypeptide 19B                                      | 0.00222 | 1.46  | Normal up vs Off IS Tolerant   |
| 225483_PM_at   | VPS26B    | vacuolar protein sorting 26 homolog B (S. pombe)                               | 0.00223 | 1.45  | Normal up vs Off IS Tolerant   |
| 230852_PM_at   | STAC3     | SH3 and cysteine rich domain 3                                                 | 0.00223 | -1.53 | Normal down vs Off IS Tolerant |
| 211101_PM_x_at | LILRA2    | leukocyte immunoglobulin-like receptor, subfamily A (with TM domain), member 2 | 0.00224 | -1.51 | Normal down vs Off IS Tolerant |
| 224723_PM_x_at | LOC401397 | hypothetical LOC401397                                                         | 0.00224 | -1.34 | Normal down vs Off IS Tolerant |
| 237555_PM_at   | CARS2     | cysteinyl-tRNA synthetase 2, mitochondrial (putative)                          | 0.00225 | -1.40 | Normal down vs Off IS Tolerant |
| 222111_PM_at   | ---       | ---                                                                            | 0.00225 | 1.81  | Normal up vs Off IS Tolerant   |



|                 |                          |                                                              |         |       |                                |
|-----------------|--------------------------|--------------------------------------------------------------|---------|-------|--------------------------------|
| 226434_PM_at    | C7orf47                  | chromosome 7 open reading frame 47                           | 0.00225 | 1.30  | Normal up vs Off IS Tolerant   |
| 225446_PM_at    | BRWD1                    | bromodomain and WD repeat domain containing 1                | 0.00225 | 1.54  | Normal up vs Off IS Tolerant   |
| 241150_PM_at    | SPTAN1                   | Spectrin, alpha, non-erythrocytic 1 (alpha-fodrin)           | 0.00225 | 1.40  | Normal up vs Off IS Tolerant   |
| 206726_PM_at    | HPGDS                    | hematopoietic prostaglandin D synthase                       | 0.00226 | -1.33 | Normal down vs Off IS Tolerant |
| 223204_PM_at    | FAM198B                  | family with sequence similarity 198, member B                | 0.00226 | -1.68 | Normal down vs Off IS Tolerant |
| 237697_PM_at    | LOC100509002             | hypothetical LOC100509002                                    | 0.00226 | -1.23 | Normal down vs Off IS Tolerant |
| 241084_PM_x_at  | DYNC1H1                  | dynein, cytoplasmic 1, heavy chain 1                         | 0.00226 | -1.23 | Normal down vs Off IS Tolerant |
| 226900_PM_at    | LOC100129387             | hypothetical LOC100129387                                    | 0.00226 | 1.28  | Normal up vs Off IS Tolerant   |
| 1553002_PM_at   | DEFB105A ///<br>DEFB105B | defensin, beta 105A /// defensin, beta 105B                  | 0.00226 | -1.36 | Normal down vs Off IS Tolerant |
| 212989_PM_at    | SGMS1                    | sphingomyelin synthase 1                                     | 0.00227 | 1.73  | Normal up vs Off IS Tolerant   |
| 238043_PM_at    | ARID1B                   | AT rich interactive domain 1B (SWI1-like)                    | 0.00227 | 1.49  | Normal up vs Off IS Tolerant   |
| 219173_PM_at    | MYO15B                   | myosin XVB pseudogene                                        | 0.00227 | 1.58  | Normal up vs Off IS Tolerant   |
| 230650_PM_at    | ---                      | ---                                                          | 0.00227 | -1.54 | Normal down vs Off IS Tolerant |
| 1553280_PM_at   | PUS10                    | pseudouridylate synthase 10                                  | 0.00227 | -1.22 | Normal down vs Off IS Tolerant |
| 239945_PM_at    | ---                      | ---                                                          | 0.00227 | -1.57 | Normal down vs Off IS Tolerant |
| 1552287_PM_s_at | AFG3L1P                  | AFG3 ATPase family gene 3-like 1 (S. cerevisiae), pseudogene | 0.00227 | 1.46  | Normal up vs Off IS Tolerant   |
| 225376_PM_at    | C20orf11                 | chromosome 20 open reading frame 11                          | 0.00228 | 1.33  | Normal up vs Off IS Tolerant   |
| 203195_PM_s_at  | NUP98                    | nucleoporin 98kDa                                            | 0.00228 | 1.41  | Normal up vs Off IS Tolerant   |
| 1566637_PM_at   | ---                      | ---                                                          | 0.00228 | -1.82 | Normal down vs Off IS Tolerant |
| 203021_PM_at    | SLPI                     | secretory leukocyte peptidase inhibitor                      | 0.00228 | -1.28 | Normal down vs Off IS Tolerant |

|                |          |                                                               |         |       |                                |
|----------------|----------|---------------------------------------------------------------|---------|-------|--------------------------------|
| 212294_PM_at   | GNG12    | guanine nucleotide binding protein (G protein), gamma 12      | 0.00228 | -1.95 | Normal down vs Off IS Tolerant |
| 201640_PM_x_at | CLPTM1   | cleft lip and palate associated transmembrane protein 1       | 0.00228 | -1.27 | Normal down vs Off IS Tolerant |
| 221854_PM_at   | PKP1     | plakophilin 1 (ectodermal dysplasia/skin fragility syndrome)  | 0.00228 | -1.20 | Normal down vs Off IS Tolerant |
| 60815_PM_at    | POLR2J4  | polymerase (RNA) II (DNA directed) polypeptide J4, pseudogene | 0.00229 | 1.67  | Normal up vs Off IS Tolerant   |
| 212860_PM_at   | ZDHC18   | zinc finger, DHHC-type containing 18                          | 0.00229 | 1.27  | Normal up vs Off IS Tolerant   |
| 226951_PM_at   | C2orf49  | chromosome 2 open reading frame 49                            | 0.00229 | 1.43  | Normal up vs Off IS Tolerant   |
| 219497_PM_s_at | BCL11A   | B-cell CLL/lymphoma 11A (zinc finger protein)                 | 0.00229 | -1.57 | Normal down vs Off IS Tolerant |
| 233206_PM_at   | SLC22A23 | solute carrier family 22, member 23                           | 0.00229 | -1.32 | Normal down vs Off IS Tolerant |
| 213873_PM_at   | ---      | ---                                                           | 0.00229 | -1.31 | Normal down vs Off IS Tolerant |
| 212567_PM_s_at | MAP4     | microtubule-associated protein 4                              | 0.00229 | 1.26  | Normal up vs Off IS Tolerant   |
| 222612_PM_at   | PSPC1    | Paraspeckle component 1                                       | 0.00230 | 1.42  | Normal up vs Off IS Tolerant   |
| 223174_PM_at   | BTBD10   | BTB (POZ) domain containing 10                                | 0.00230 | -1.24 | Normal down vs Off IS Tolerant |
| 209993_PM_at   | ABCB1    | ATP-binding cassette, sub-family B (MDR/TAP), member 1        | 0.00230 | 1.91  | Normal up vs Off IS Tolerant   |
| 209943_PM_at   | FBXL4    | F-box and leucine-rich repeat protein 4                       | 0.00230 | -1.69 | Normal down vs Off IS Tolerant |
| 208044_PM_s_at | PPARD    | peroxisome proliferator-activated receptor delta              | 0.00231 | 1.28  | Normal up vs Off IS Tolerant   |
| 223947_PM_s_at | MED23    | mediator complex subunit 23                                   | 0.00231 | 1.44  | Normal up vs Off IS Tolerant   |
| 226202_PM_at   | ZNF398   | zinc finger protein 398                                       | 0.00231 | 1.65  | Normal up vs Off IS Tolerant   |
| 223358_PM_s_at | PDE7A    | phosphodiesterase 7A                                          | 0.00232 | 1.57  | Normal up vs Off IS Tolerant   |
| 1552263_PM_at  | MAPK1    | mitogen-activated protein kinase 1                            | 0.00232 | -1.50 | Normal down vs Off IS Tolerant |
| 203052_PM_at   | C2       | complement component 2                                        | 0.00232 | -1.44 | Normal down vs Off IS Tolerant |
| 1561161_PM_at  | ---      | ---                                                           | 0.00232 | -1.60 | Normal down vs Off IS Tolerant |

|                 |                   |                                                                                         |         |       |                                |
|-----------------|-------------------|-----------------------------------------------------------------------------------------|---------|-------|--------------------------------|
| 225073_PM_at    | PPHLN1            | periphilin 1                                                                            | 0.00232 | 1.26  | Normal up vs Off IS Tolerant   |
| 1553647_PM_at   | CDYL2             | chromodomain protein, Y-like 2                                                          | 0.00233 | -1.57 | Normal down vs Off IS Tolerant |
| 211982_PM_x_at  | XPO6              | exportin 6                                                                              | 0.00233 | 1.17  | Normal up vs Off IS Tolerant   |
| 208336_PM_s_at  | TECR              | trans-2,3-enoyl-CoA reductase                                                           | 0.00233 | 1.48  | Normal up vs Off IS Tolerant   |
| 214158_PM_s_at  | PRDM10            | PR domain containing 10                                                                 | 0.00233 | -1.26 | Normal down vs Off IS Tolerant |
| 236998_PM_at    | CCDC56            | Coiled-coil domain containing 56                                                        | 0.00234 | -1.27 | Normal down vs Off IS Tolerant |
| 224809_PM_x_at  | TINF2             | TERF1 (TRF1)-interacting nuclear factor 2                                               | 0.00234 | -1.19 | Normal down vs Off IS Tolerant |
| 1555253_PM_at   | COL25A1           | collagen, type XXV, alpha 1                                                             | 0.00234 | -1.43 | Normal down vs Off IS Tolerant |
| 242424_PM_at    | ---               | ---                                                                                     | 0.00234 | 1.53  | Normal up vs Off IS Tolerant   |
| 227675_PM_at    | LRSAM1            | leucine rich repeat and sterile alpha motif containing 1                                | 0.00234 | 1.29  | Normal up vs Off IS Tolerant   |
| 226433_PM_at    | RNF157            | ring finger protein 157                                                                 | 0.00234 | 2.03  | Normal up vs Off IS Tolerant   |
| 209282_PM_at    | PRKD2             | protein kinase D2                                                                       | 0.00234 | 1.40  | Normal up vs Off IS Tolerant   |
| 204772_PM_s_at  | TTF1              | transcription termination factor, RNA polymerase I                                      | 0.00234 | 1.53  | Normal up vs Off IS Tolerant   |
| 232311_PM_at    | B2M               | Beta-2-microglobulin                                                                    | 0.00234 | 1.51  | Normal up vs Off IS Tolerant   |
| 205115_PM_s_at  | RBM19             | RNA binding motif protein 19                                                            | 0.00235 | 1.33  | Normal up vs Off IS Tolerant   |
| 1563333_PM_at   | ---               | ---                                                                                     | 0.00235 | -1.27 | Normal down vs Off IS Tolerant |
| 203761_PM_at    | SLA               | Src-like-adaptor                                                                        | 0.00235 | -1.42 | Normal down vs Off IS Tolerant |
| 1568900_PM_a_at | ZNF568            | zinc finger protein 568                                                                 | 0.00236 | 1.40  | Normal up vs Off IS Tolerant   |
| 212384_PM_at    | ATP6V1G2 /// BAT1 | ATPase, H+ transporting, lysosomal 13kDa, V1 subunit G2 /// HLA-B associated transcript | 0.00236 | 1.64  | Normal up vs Off IS Tolerant   |
| 213444_PM_at    | ZNF862            | zinc finger protein 862                                                                 | 0.00236 | 1.46  | Normal up vs Off IS Tolerant   |
| 217729_PM_s_at  | AES               | amino-terminal enhancer of split                                                        | 0.00237 | 1.35  | Normal up vs Off IS Tolerant   |
| 213984_PM_at    | PDS5A             | PDS5, regulator of cohesion maintenance, homolog A (S. cerevisiae)                      | 0.00237 | 2.05  | Normal up vs Off IS Tolerant   |

|                 |              |                                                                             |         |       |                                |
|-----------------|--------------|-----------------------------------------------------------------------------|---------|-------|--------------------------------|
| 241655_PM_at    | ---          | ---                                                                         | 0.00237 | -1.34 | Normal down vs Off IS Tolerant |
| 1558937_PM_s_at | ---          | ---                                                                         | 0.00237 | -1.72 | Normal down vs Off IS Tolerant |
| 213306_PM_at    | MPDZ         | multiple PDZ domain protein                                                 | 0.00237 | -2.57 | Normal down vs Off IS Tolerant |
| 244097_PM_at    | CR2          | complement component (3d/Epstein Barr virus) receptor 2                     | 0.00237 | -1.45 | Normal down vs Off IS Tolerant |
| 227273_PM_at    | ---          | ---                                                                         | 0.00238 | 1.31  | Normal up vs Off IS Tolerant   |
| 225497_PM_at    | ATE1         | arginyltransferase 1                                                        | 0.00238 | 1.54  | Normal up vs Off IS Tolerant   |
| 1569681_PM_at   | ---          | ---                                                                         | 0.00238 | -1.53 | Normal down vs Off IS Tolerant |
| 213691_PM_at    | LOC100506002 | hypothetical protein LOC100506002                                           | 0.00238 | 1.37  | Normal up vs Off IS Tolerant   |
| 231735_PM_s_at  | MALAT1       | metastasis associated lung adenocarcinoma transcript 1 (non-protein coding) | 0.00239 | -1.59 | Normal down vs Off IS Tolerant |
| 205787_PM_x_at  | ZC3H11A      | zinc finger CCCH-type containing 11A                                        | 0.00239 | -1.43 | Normal down vs Off IS Tolerant |
| 224015_PM_s_at  | MRPS25       | mitochondrial ribosomal protein S25                                         | 0.00239 | 1.47  | Normal up vs Off IS Tolerant   |
| 214539_PM_at    | SERPINB10    | serpin peptidase inhibitor, clade B (ovalbumin), member 10                  | 0.00240 | -1.27 | Normal down vs Off IS Tolerant |
| 204161_PM_s_at  | ENPP4        | ectonucleotide pyrophosphatase/phosphodiesterase 4 (putative)               | 0.00240 | 1.67  | Normal up vs Off IS Tolerant   |
| 224763_PM_at    | RPL37        | ribosomal protein L37                                                       | 0.00240 | 1.60  | Normal up vs Off IS Tolerant   |
| 1557581_PM_x_at | ---          | ---                                                                         | 0.00240 | 1.40  | Normal up vs Off IS Tolerant   |
| 208079_PM_s_at  | AURKA        | aurora kinase A                                                             | 0.00240 | -1.32 | Normal down vs Off IS Tolerant |
| 219138_PM_at    | RPL14        | ribosomal protein L14                                                       | 0.00240 | -1.39 | Normal down vs Off IS Tolerant |
| 201314_PM_at    | STK25        | serine/threonine kinase 25                                                  | 0.00240 | 1.46  | Normal up vs Off IS Tolerant   |
| 244873_PM_s_at  | ---          | ---                                                                         | 0.00240 | 1.43  | Normal up vs Off IS Tolerant   |
| 244436_PM_at    | ---          | ---                                                                         | 0.00241 | -1.30 | Normal down vs Off IS Tolerant |
| 214742_PM_at    | AZI1         | 5-azacytidine induced 1                                                     | 0.00241 | 1.35  | Normal up vs Off IS Tolerant   |

|                 |              |                                                                                |         |       |                                |
|-----------------|--------------|--------------------------------------------------------------------------------|---------|-------|--------------------------------|
| 218788_PM_s_at  | SMYD3        | SET and MYND domain containing 3                                               | 0.00241 | 1.53  | Normal up vs Off IS Tolerant   |
| 1556936_PM_at   | ---          | ---                                                                            | 0.00241 | -1.87 | Normal down vs Off IS Tolerant |
| 205864_PM_at    | SLC7A4       | solute carrier family 7 (cationic amino acid transporter, y+ system), member 4 | 0.00242 | -1.22 | Normal down vs Off IS Tolerant |
| 208883_PM_at    | UBR5         | ubiquitin protein ligase E3 component n-recognin 5                             | 0.00242 | 1.45  | Normal up vs Off IS Tolerant   |
| 233693_PM_at    | C1orf201     | chromosome 1 open reading frame 201                                            | 0.00242 | -1.29 | Normal down vs Off IS Tolerant |
| 237347_PM_at    | ---          | ---                                                                            | 0.00242 | 1.29  | Normal up vs Off IS Tolerant   |
| 1569679_PM_at   | CDH22        | cadherin 22, type 2                                                            | 0.00242 | -1.51 | Normal down vs Off IS Tolerant |
| 225055_PM_at    | LOC100499466 | hypothetical LOC100499466                                                      | 0.00242 | 1.63  | Normal up vs Off IS Tolerant   |
| 1558803_PM_at   | ---          | ---                                                                            | 0.00243 | -1.26 | Normal down vs Off IS Tolerant |
| 221606_PM_s_at  | HMG5         | high-mobility group nucleosome binding domain 5                                | 0.00243 | 1.37  | Normal up vs Off IS Tolerant   |
| 214032_PM_at    | ZAP70        | zeta-chain (TCR) associated protein kinase 70kDa                               | 0.00243 | 1.65  | Normal up vs Off IS Tolerant   |
| 205383_PM_s_at  | ZBTB20       | zinc finger and BTB domain containing 20                                       | 0.00243 | 1.33  | Normal up vs Off IS Tolerant   |
| 242965_PM_at    | ---          | ---                                                                            | 0.00243 | 1.45  | Normal up vs Off IS Tolerant   |
| 1554239_PM_s_at | ZADH2        | zinc binding alcohol dehydrogenase domain containing 2                         | 0.00243 | 1.40  | Normal up vs Off IS Tolerant   |
| 236651_PM_at    | KALRN        | kalirin, RhoGEF kinase                                                         | 0.00243 | -1.21 | Normal down vs Off IS Tolerant |
| 219773_PM_at    | NOX4         | NADPH oxidase 4                                                                | 0.00243 | -1.93 | Normal down vs Off IS Tolerant |
| 227454_PM_at    | TAOK1        | TAO kinase 1                                                                   | 0.00243 | -1.46 | Normal down vs Off IS Tolerant |
| 235149_PM_at    | PGM2L1       | phosphoglucomutase 2-like 1                                                    | 0.00243 | -1.37 | Normal down vs Off IS Tolerant |
| 227378_PM_x_at  | C16orf13     | chromosome 16 open reading frame 13                                            | 0.00244 | 1.36  | Normal up vs Off IS Tolerant   |

|                |          |                                                                                         |         |       |                                |
|----------------|----------|-----------------------------------------------------------------------------------------|---------|-------|--------------------------------|
| 226164_PM_x_at | RIMKLB   | Ribosomal modification protein rimK-like family member B                                | 0.00244 | 1.45  | Normal up vs Off IS Tolerant   |
| 232726_PM_at   | ---      | ---                                                                                     | 0.00244 | -1.82 | Normal down vs Off IS Tolerant |
| 235526_PM_at   | SOX6     | SRY (sex determining region Y)-box 6                                                    | 0.00244 | 1.44  | Normal up vs Off IS Tolerant   |
| 240791_PM_at   | ---      | ---                                                                                     | 0.00245 | -1.28 | Normal down vs Off IS Tolerant |
| 208107_PM_s_at | LOC81691 | exonuclease NEF-sp                                                                      | 0.00245 | -1.23 | Normal down vs Off IS Tolerant |
| 233231_PM_at   | MCCC2    | Methylcrotonoyl-Coenzyme A carboxylase 2 (beta)                                         | 0.00245 | 1.36  | Normal up vs Off IS Tolerant   |
| 212381_PM_at   | USP24    | ubiquitin specific peptidase 24                                                         | 0.00245 | 1.53  | Normal up vs Off IS Tolerant   |
| 221856_PM_s_at | FAM63A   | family with sequence similarity 63, member A                                            | 0.00245 | 1.37  | Normal up vs Off IS Tolerant   |
| 219126_PM_at   | PHF10    | PHD finger protein 10                                                                   | 0.00245 | 1.23  | Normal up vs Off IS Tolerant   |
| 241058_PM_at   | ---      | ---                                                                                     | 0.00246 | -1.39 | Normal down vs Off IS Tolerant |
| 217762_PM_s_at | RAB31    | RAB31, member RAS oncogene family                                                       | 0.00246 | -1.37 | Normal down vs Off IS Tolerant |
| 201762_PM_s_at | PSME2    | proteasome (prosome, macropain) activator subunit 2 (PA28 beta)                         | 0.00246 | -1.22 | Normal down vs Off IS Tolerant |
| 237581_PM_at   | ---      | ---                                                                                     | 0.00246 | -1.22 | Normal down vs Off IS Tolerant |
| 207221_PM_at   | F2RL3    | coagulation factor II (thrombin) receptor-like 3                                        | 0.00246 | -1.18 | Normal down vs Off IS Tolerant |
| 1555555_PM_at  | BBS9     | Bardet-Biedl syndrome 9                                                                 | 0.00246 | -1.36 | Normal down vs Off IS Tolerant |
| 212808_PM_at   | NFATC2IP | nuclear factor of activated T-cells, cytoplasmic, calcineurin-dependent 2 interacting p | 0.00246 | 1.68  | Normal up vs Off IS Tolerant   |
| 221959_PM_at   | FAM110B  | family with sequence similarity 110, member B                                           | 0.00247 | -1.44 | Normal down vs Off IS Tolerant |
| 204265_PM_s_at | GPSM3    | G-protein signaling modulator 3                                                         | 0.00247 | -1.24 | Normal down vs Off IS Tolerant |
| 227189_PM_at   | CPNE5    | copine V                                                                                | 0.00247 | 1.49  | Normal up vs Off IS Tolerant   |

|                 |                          |                                                                                         |         |       |                                |
|-----------------|--------------------------|-----------------------------------------------------------------------------------------|---------|-------|--------------------------------|
| 233744_PM_at    | ---                      | ---                                                                                     | 0.00247 | -1.34 | Normal down vs Off IS Tolerant |
| 1552910_PM_at   | SIGLEC11                 | sialic acid binding Ig-like lectin 11                                                   | 0.00248 | -1.36 | Normal down vs Off IS Tolerant |
| 210864_PM_x_at  | HFE                      | hemochromatosis                                                                         | 0.00248 | -1.25 | Normal down vs Off IS Tolerant |
| 219570_PM_at    | KIF16B                   | kinesin family member 16B                                                               | 0.00249 | 1.55  | Normal up vs Off IS Tolerant   |
| 1560735_PM_s_at | LOC727924                | hypothetical LOC727924                                                                  | 0.00249 | -1.45 | Normal down vs Off IS Tolerant |
| 226655_PM_at    | STX17                    | syntaxin 17                                                                             | 0.00249 | 1.36  | Normal up vs Off IS Tolerant   |
| 237314_PM_at    | ENKUR                    | enkurin, TRPC channel interacting protein                                               | 0.00250 | 1.46  | Normal up vs Off IS Tolerant   |
| 1559252_PM_a_at | C20orf29                 | Chromosome 20 open reading frame 29                                                     | 0.00250 | 1.75  | Normal up vs Off IS Tolerant   |
| 236876_PM_at    | H1FNT                    | H1 histone family, member N, testis-specific                                            | 0.00251 | -1.28 | Normal down vs Off IS Tolerant |
| 234057_PM_at    | ---                      | ---                                                                                     | 0.00251 | -1.98 | Normal down vs Off IS Tolerant |
| 228292_PM_at    | ---                      | ---                                                                                     | 0.00251 | 1.36  | Normal up vs Off IS Tolerant   |
| 244131_PM_at    | HNRNPA2B1                | heterogeneous nuclear ribonucleoprotein A2/B1                                           | 0.00251 | -1.29 | Normal down vs Off IS Tolerant |
| 236919_PM_at    | ---                      | ---                                                                                     | 0.00251 | -1.32 | Normal down vs Off IS Tolerant |
| 227085_PM_at    | H2AFV                    | H2A histone family, member V                                                            | 0.00251 | 1.46  | Normal up vs Off IS Tolerant   |
| 208307_PM_at    | RBMY1A1 ///<br>RBMY1D    | RNA binding motif protein, Y-linked, family 1, member A1 /// RNA binding motif protein, | 0.00251 | -2.02 | Normal down vs Off IS Tolerant |
| 235320_PM_at    | ARL6 ///<br>LOC100506362 | ADP-ribosylation factor-like 6 /// hypothetical LOC100506362                            | 0.00251 | -1.56 | Normal down vs Off IS Tolerant |
| 1558117_PM_s_at | USP31                    | ubiquitin specific peptidase 31                                                         | 0.00252 | -1.31 | Normal down vs Off IS Tolerant |
| 236436_PM_at    | SLC25A45                 | solute carrier family 25, member 45                                                     | 0.00252 | 1.42  | Normal up vs Off IS Tolerant   |
| 215816_PM_at    | LOC91316                 | glucuronidase, beta/immunoglobulin lambda-like polypeptide 1 pseudogene                 | 0.00252 | -1.32 | Normal down vs Off IS Tolerant |
| 239543_PM_s_at  | ---                      | ---                                                                                     | 0.00252 | 1.54  | Normal up vs Off IS Tolerant   |

|                |                                |                                                                                          |         |       |                                |
|----------------|--------------------------------|------------------------------------------------------------------------------------------|---------|-------|--------------------------------|
| 210148_PM_at   | HIPK3                          | homeodomain interacting protein kinase 3                                                 | 0.00253 | -1.50 | Normal down vs Off IS Tolerant |
| 233356_PM_at   | ---                            | ---                                                                                      | 0.00254 | -1.44 | Normal down vs Off IS Tolerant |
| 206019_PM_at   | RBM19                          | RNA binding motif protein 19                                                             | 0.00254 | 1.47  | Normal up vs Off IS Tolerant   |
| 213481_PM_at   | LOC100510626 /// S100A13       | hypothetical LOC100510626 /// S100 calcium binding protein A13                           | 0.00254 | -1.25 | Normal down vs Off IS Tolerant |
| 219259_PM_at   | SEMA4A                         | sema domain, immunoglobulin domain (Ig), transmembrane domain (TM) and short cytoplasmic | 0.00254 | -1.41 | Normal down vs Off IS Tolerant |
| 226881_PM_at   | GRPEL2                         | GrpE-like 2, mitochondrial (E. coli)                                                     | 0.00254 | 1.51  | Normal up vs Off IS Tolerant   |
| 228384_PM_s_at | PYROXD2                        | pyridine nucleotide-disulphide oxidoreductase domain 2                                   | 0.00254 | 1.40  | Normal up vs Off IS Tolerant   |
| 240635_PM_at   | ---                            | ---                                                                                      | 0.00255 | -1.41 | Normal down vs Off IS Tolerant |
| 1562982_PM_at  | ---                            | ---                                                                                      | 0.00255 | -1.85 | Normal down vs Off IS Tolerant |
| 218675_PM_at   | SLC22A17                       | solute carrier family 22, member 17                                                      | 0.00255 | 1.31  | Normal up vs Off IS Tolerant   |
| 215684_PM_s_at | ASCC2                          | activating signal cointegrator 1 complex subunit 2                                       | 0.00255 | 1.50  | Normal up vs Off IS Tolerant   |
| 203356_PM_at   | CAPN7                          | calpain 7                                                                                | 0.00255 | 1.53  | Normal up vs Off IS Tolerant   |
| 214740_PM_at   | POLR2J /// POLR2J2 /// POLR2J3 | polymerase (RNA) II (DNA directed) polypeptide J, 13.3kDa /// polymerase (RNA) II (DNA   | 0.00256 | 1.39  | Normal up vs Off IS Tolerant   |
| 217494_PM_s_at | PTENP1                         | phosphatase and tensin homolog pseudogene 1                                              | 0.00256 | -1.38 | Normal down vs Off IS Tolerant |
| 39835_PM_at    | SBF1                           | SET binding factor 1                                                                     | 0.00256 | 1.45  | Normal up vs Off IS Tolerant   |
| 208780_PM_x_at | VAPA                           | VAMP (vesicle-associated membrane protein)-associated protein A, 33kDa                   | 0.00256 | -1.21 | Normal down vs Off IS Tolerant |
| 235754_PM_at   | HFE                            | hemochromatosis                                                                          | 0.00256 | -1.39 | Normal down vs Off IS Tolerant |
| 204928_PM_s_at | SLC10A3                        | solute carrier family 10 (sodium/bile acid cotransporter family), member 3               | 0.00257 | 1.42  | Normal up vs Off IS Tolerant   |
| 237974_PM_at   | ABHD12B                        | abhydrolase domain containing 12B                                                        | 0.00257 | -1.26 | Normal down vs Off IS Tolerant |



|                 |           |                                                                                       |         |       |                                |
|-----------------|-----------|---------------------------------------------------------------------------------------|---------|-------|--------------------------------|
| 222148_PM_s_at  | RHOT1     | ras homolog gene family, member T1                                                    | 0.00257 | -1.30 | Normal down vs Off IS Tolerant |
| 1570262_PM_at   | ---       | ---                                                                                   | 0.00257 | -1.27 | Normal down vs Off IS Tolerant |
| 202521_PM_at    | CTCF      | CCCTC-binding factor (zinc finger protein)                                            | 0.00257 | 1.30  | Normal up vs Off IS Tolerant   |
| 242704_PM_at    | ZNF821    | zinc finger protein 821                                                               | 0.00257 | -1.23 | Normal down vs Off IS Tolerant |
| 231823_PM_s_at  | SH3PXD2B  | SH3 and PX domains 2B                                                                 | 0.00258 | -1.22 | Normal down vs Off IS Tolerant |
| 1557628_PM_s_at | LOC283745 | hypothetical protein LOC283745                                                        | 0.00258 | -1.28 | Normal down vs Off IS Tolerant |
| 238879_PM_at    | DCUN1D1   | DCN1, defective in cullin neddylation 1, domain containing 1 ( <i>S. cerevisiae</i> ) | 0.00258 | 1.52  | Normal up vs Off IS Tolerant   |
| 202210_PM_x_at  | GSK3A     | glycogen synthase kinase 3 alpha                                                      | 0.00258 | -1.34 | Normal down vs Off IS Tolerant |
| 218018_PM_at    | PDXK      | pyridoxal (pyridoxine, vitamin B6) kinase                                             | 0.00258 | -1.37 | Normal down vs Off IS Tolerant |
| 1559039_PM_at   | DHX36     | DEAH (Asp-Glu-Ala-His) box polypeptide 36                                             | 0.00258 | 1.84  | Normal up vs Off IS Tolerant   |
| 233380_PM_s_at  | RUFY1     | RUN and FYVE domain containing 1                                                      | 0.00259 | 1.49  | Normal up vs Off IS Tolerant   |
| 215931_PM_s_at  | ARFGEF2   | ADP-ribosylation factor guanine nucleotide-exchange factor 2 (brefeldin A inhibited)  | 0.00259 | 1.45  | Normal up vs Off IS Tolerant   |
| 224510_PM_s_at  | CLPB      | ClpB caseinolytic peptidase B homolog ( <i>E. coli</i> )                              | 0.00259 | -1.24 | Normal down vs Off IS Tolerant |
| 235679_PM_at    | ---       | ---                                                                                   | 0.00259 | 1.42  | Normal up vs Off IS Tolerant   |
| 218625_PM_at    | NRN1      | neuritin 1                                                                            | 0.00259 | -1.42 | Normal down vs Off IS Tolerant |
| 202304_PM_at    | FNDC3A    | fibronectin type III domain containing 3A                                             | 0.00259 | 1.48  | Normal up vs Off IS Tolerant   |
| 1555662_PM_s_at | DAOA      | D-amino acid oxidase activator                                                        | 0.00260 | -1.37 | Normal down vs Off IS Tolerant |
| 232048_PM_at    | FAM76B    | family with sequence similarity 76, member B                                          | 0.00260 | 1.54  | Normal up vs Off IS Tolerant   |

|                      |              |                                                               |         |       |                                |
|----------------------|--------------|---------------------------------------------------------------|---------|-------|--------------------------------|
| 218064_PM_s_at       | AKAP8L       | A kinase (PRKA) anchor protein 8-like                         | 0.00260 | 1.51  | Normal up vs Off IS Tolerant   |
| 1559127_PM_x_at      | RRP12        | ribosomal RNA processing 12 homolog (S. cerevisiae)           | 0.00260 | 1.33  | Normal up vs Off IS Tolerant   |
| 244020_PM_at         | ---          | ---                                                           | 0.00261 | 1.41  | Normal up vs Off IS Tolerant   |
| 226687_PM_at         | PRPF40A      | PRP40 pre-mRNA processing factor 40 homolog A (S. cerevisiae) | 0.00261 | 1.33  | Normal up vs Off IS Tolerant   |
| 229248_PM_at         | ---          | ---                                                           | 0.00261 | 1.36  | Normal up vs Off IS Tolerant   |
| 1559159_PM_at        | CEP68        | centrosomal protein 68kDa                                     | 0.00261 | 1.20  | Normal up vs Off IS Tolerant   |
| 227567_PM_at         | LOC100499466 | hypothetical LOC100499466                                     | 0.00261 | 1.38  | Normal up vs Off IS Tolerant   |
| 206582_PM_s_at       | GPR56        | G protein-coupled receptor 56                                 | 0.00261 | -1.31 | Normal down vs Off IS Tolerant |
| 1556292_PM_s_at      | POM121L12    | POM121 membrane glycoprotein-like 12                          | 0.00262 | -1.33 | Normal down vs Off IS Tolerant |
| 208919_PM_s_at       | NADK         | NAD kinase                                                    | 0.00262 | -1.35 | Normal down vs Off IS Tolerant |
| 242857_PM_at         | ---          | ---                                                           | 0.00262 | -1.48 | Normal down vs Off IS Tolerant |
| 238351_PM_x_at       | ---          | ---                                                           | 0.00262 | -1.29 | Normal down vs Off IS Tolerant |
| 216528_PM_at         | ---          | ---                                                           | 0.00262 | -1.29 | Normal down vs Off IS Tolerant |
| 41397_PM_at          | ZNF821       | zinc finger protein 821                                       | 0.00262 | 1.31  | Normal up vs Off IS Tolerant   |
| 222605_PM_at         | RCOR3        | REST corepressor 3                                            | 0.00263 | 1.31  | Normal up vs Off IS Tolerant   |
| 1561134_PM_at        | ---          | ---                                                           | 0.00263 | -1.40 | Normal down vs Off IS Tolerant |
| 43977_PM_at          | TMEM161A     | transmembrane protein 161A                                    | 0.00263 | 1.22  | Normal up vs Off IS Tolerant   |
| 212849_PM_at         | AXIN1        | axin 1                                                        | 0.00263 | 1.28  | Normal up vs Off IS Tolerant   |
| 230496_PM_at         | FAM123A      | family with sequence similarity 123A                          | 0.00263 | -1.47 | Normal down vs Off IS Tolerant |
| 229670_PM_at         | ---          | ---                                                           | 0.00263 | -1.69 | Normal down vs Off IS Tolerant |
| AFFX-r2-Ec-bioB-5_at | ---          | ---                                                           | 0.00263 | -1.95 | Normal down vs Off IS Tolerant |
| 221427_PM_s_at       | CCNL2        | cyclin L2                                                     | 0.00264 | 1.45  | Normal up vs Off IS Tolerant   |
| 207315_PM_at         | CD226        | CD226 molecule                                                | 0.00264 | 1.52  | Normal up vs Off IS Tolerant   |

|                 |                                                          |                                                                                               |         |       |                                |
|-----------------|----------------------------------------------------------|-----------------------------------------------------------------------------------------------|---------|-------|--------------------------------|
| 216650_PM_at    | ---                                                      | ---                                                                                           | 0.00264 | 1.24  | Normal up vs Off IS Tolerant   |
| 232822_PM_x_at  | ---                                                      | ---                                                                                           | 0.00264 | -1.45 | Normal down vs Off IS Tolerant |
| 216302_PM_at    | HNRNPC ///<br>HNRNPCL1 ///<br>LOC440563 ///<br>LOC649330 | heterogeneous nuclear<br>ribonucleoprotein C (C1/C2) ///<br>heterogeneous nuclear ribonucleop | 0.00264 | -1.24 | Normal down vs Off IS Tolerant |
| 225586_PM_at    | WDR85                                                    | WD repeat domain 85                                                                           | 0.00264 | 1.31  | Normal up vs Off IS Tolerant   |
| 204000_PM_at    | GNB5                                                     | guanine nucleotide binding protein (G<br>protein), beta 5                                     | 0.00265 | 1.47  | Normal up vs Off IS Tolerant   |
| 1554517_PM_x_at | LOC100288109 ///<br>LOC203274                            | Hypothetical protein LOC100288109 ///<br>Hypothetical protein LOC203274                       | 0.00265 | -1.31 | Normal down vs Off IS Tolerant |
| 238114_PM_at    | ---                                                      | ---                                                                                           | 0.00265 | 1.68  | Normal up vs Off IS Tolerant   |
| 1570306_PM_at   | ST18                                                     | Suppression of tumorigenicity 18 (breast<br>carcinoma) (zinc finger protein)                  | 0.00265 | -1.33 | Normal down vs Off IS Tolerant |
| 215582_PM_x_at  | MCM3AP                                                   | minichromosome maintenance complex<br>component 3 associated protein                          | 0.00265 | -1.91 | Normal down vs Off IS Tolerant |
| 200004_PM_at    | EIF4G2                                                   | eukaryotic translation initiation factor 4<br>gamma, 2                                        | 0.00266 | 1.20  | Normal up vs Off IS Tolerant   |
| 234460_PM_at    | ---                                                      | ---                                                                                           | 0.00266 | -1.24 | Normal down vs Off IS Tolerant |
| 1565778_PM_at   | ABCA8                                                    | ATP-binding cassette, sub-family A<br>(ABC1), member 8                                        | 0.00266 | -1.27 | Normal down vs Off IS Tolerant |
| 1558020_PM_at   | ERGIC3                                                   | ERGIC and golgi 3                                                                             | 0.00266 | -1.27 | Normal down vs Off IS Tolerant |
| 227586_PM_at    | TMEM170A                                                 | transmembrane protein 170A                                                                    | 0.00266 | 1.37  | Normal up vs Off IS Tolerant   |
| 217923_PM_at    | PEF1                                                     | penta-EF-hand domain containing 1                                                             | 0.00266 | -1.30 | Normal down vs Off IS Tolerant |
| 229426_PM_at    | COX5A                                                    | cytochrome c oxidase subunit Va                                                               | 0.00266 | 1.46  | Normal up vs Off IS Tolerant   |
| 201764_PM_at    | TMEM106C                                                 | transmembrane protein 106C                                                                    | 0.00267 | 1.37  | Normal up vs Off IS Tolerant   |
| 1555575_PM_a_at | KDEL1                                                    | KDEL (Lys-Asp-Glu-Leu) endoplasmic<br>reticulum protein retention receptor 1                  | 0.00267 | -1.19 | Normal down vs Off IS Tolerant |

|                 |          |                                                            |         |       |                                |
|-----------------|----------|------------------------------------------------------------|---------|-------|--------------------------------|
| 1564372_PM_s_at | CASC2    | cancer susceptibility candidate 2                          | 0.00267 | -1.87 | Normal down vs Off IS Tolerant |
| 242984_PM_at    | MKLN1    | muskelin 1, intracellular mediator containing kelch motifs | 0.00268 | -1.74 | Normal down vs Off IS Tolerant |
| 234400_PM_at    | ---      | ---                                                        | 0.00268 | -1.26 | Normal down vs Off IS Tolerant |
| 242810_PM_x_at  | ---      | ---                                                        | 0.00268 | -1.47 | Normal down vs Off IS Tolerant |
| 237284_PM_at    | DNAJB8   | DnaJ (Hsp40) homolog, subfamily B, member 8                | 0.00269 | -1.21 | Normal down vs Off IS Tolerant |
| 200819_PM_s_at  | RPS15    | ribosomal protein S15                                      | 0.00269 | 1.20  | Normal up vs Off IS Tolerant   |
| 226895_PM_at    | NFIC     | Nuclear factor I/C (CCAAT-binding transcription factor)    | 0.00269 | 1.38  | Normal up vs Off IS Tolerant   |
| 1553126_PM_a_at | SLC39A12 | solute carrier family 39 (zinc transporter), member 12     | 0.00270 | -1.25 | Normal down vs Off IS Tolerant |
| 1560861_PM_at   | ---      | ---                                                        | 0.00270 | -1.33 | Normal down vs Off IS Tolerant |
| 227294_PM_at    | ZNF689   | zinc finger protein 689                                    | 0.00270 | 1.50  | Normal up vs Off IS Tolerant   |
| 209072_PM_at    | MBP      | myelin basic protein                                       | 0.00270 | 1.32  | Normal up vs Off IS Tolerant   |
| 1569597_PM_at   | ---      | ---                                                        | 0.00270 | 1.52  | Normal up vs Off IS Tolerant   |
| 210416_PM_s_at  | CHEK2    | CHK2 checkpoint homolog (S. pombe)                         | 0.00270 | -1.43 | Normal down vs Off IS Tolerant |
| 1565830_PM_at   | ---      | ---                                                        | 0.00270 | 1.38  | Normal up vs Off IS Tolerant   |
| 1557667_PM_at   | ---      | ---                                                        | 0.00271 | 1.48  | Normal up vs Off IS Tolerant   |
| 212927_PM_at    | SMC5     | structural maintenance of chromosomes 5                    | 0.00271 | 1.28  | Normal up vs Off IS Tolerant   |
| 224683_PM_at    | FBXO18   | F-box protein, helicase, 18                                | 0.00271 | 1.30  | Normal up vs Off IS Tolerant   |
| 220335_PM_x_at  | CES3     | carboxylesterase 3                                         | 0.00271 | -1.84 | Normal down vs Off IS Tolerant |
| 233764_PM_s_at  | LARP1B   | La ribonucleoprotein domain family, member 1B              | 0.00272 | -1.48 | Normal down vs Off IS Tolerant |
| 225914_PM_s_at  | CAB39L   | calcium binding protein 39-like                            | 0.00272 | -1.42 | Normal down vs Off IS Tolerant |
| 1555904_PM_at   | ---      | ---                                                        | 0.00272 | -1.36 | Normal down vs Off IS Tolerant |

|                |                  |                                                                              |         |       |                                |
|----------------|------------------|------------------------------------------------------------------------------|---------|-------|--------------------------------|
| 214465_PM_at   | ORM1 /// ORM2    | orosomuroid 1 /// orosomuroid 2                                              | 0.00272 | -1.22 | Normal down vs Off IS Tolerant |
| 229609_PM_at   | LOC728190        | hypothetical LOC728190                                                       | 0.00272 | -1.69 | Normal down vs Off IS Tolerant |
| 228170_PM_at   | OLIG1            | oligodendrocyte transcription factor 1                                       | 0.00272 | -2.05 | Normal down vs Off IS Tolerant |
| 211469_PM_s_at | CXCR6            | chemokine (C-X-C motif) receptor 6                                           | 0.00273 | -1.36 | Normal down vs Off IS Tolerant |
| 220743_PM_at   | ---              | ---                                                                          | 0.00273 | -1.26 | Normal down vs Off IS Tolerant |
| 221516_PM_s_at | SMCR7L           | Smith-Magenis syndrome chromosome region, candidate 7-like                   | 0.00273 | 1.29  | Normal up vs Off IS Tolerant   |
| 227929_PM_at   | ---              | ---                                                                          | 0.00273 | -1.74 | Normal down vs Off IS Tolerant |
| 208807_PM_s_at | CHD3             | chromodomain helicase DNA binding protein 3                                  | 0.00274 | 1.31  | Normal up vs Off IS Tolerant   |
| 229796_PM_at   | SIX4             | SIX homeobox 4                                                               | 0.00274 | -1.90 | Normal down vs Off IS Tolerant |
| 223176_PM_at   | KCTD20           | potassium channel tetramerisation domain containing 20                       | 0.00274 | 1.69  | Normal up vs Off IS Tolerant   |
| 235676_PM_at   | ---              | ---                                                                          | 0.00274 | 1.28  | Normal up vs Off IS Tolerant   |
| 1561271_PM_at  | CCDC144C         | coiled-coil domain containing 144C                                           | 0.00274 | -2.12 | Normal down vs Off IS Tolerant |
| 225573_PM_at   | ACAD11 /// NPHP3 | acyl-CoA dehydrogenase family, member 11 /// nephronophthisis 3 (adolescent) | 0.00274 | 1.40  | Normal up vs Off IS Tolerant   |
| 235903_PM_at   | ANKS6            | ankyrin repeat and sterile alpha motif domain containing 6                   | 0.00275 | 1.29  | Normal up vs Off IS Tolerant   |
| 228068_PM_at   | GOLGA7B          | golgin A7 family, member B                                                   | 0.00275 | 1.40  | Normal up vs Off IS Tolerant   |
| 234915_PM_s_at | DENR             | density-regulated protein                                                    | 0.00275 | 1.51  | Normal up vs Off IS Tolerant   |
| 218487_PM_at   | ALAD             | aminolevulinatase dehydratase                                                | 0.00275 | 1.43  | Normal up vs Off IS Tolerant   |
| 231555_PM_at   | ---              | ---                                                                          | 0.00275 | -1.27 | Normal down vs Off IS Tolerant |

|                 |                                                                             |                                                                                               |         |       |                                |
|-----------------|-----------------------------------------------------------------------------|-----------------------------------------------------------------------------------------------|---------|-------|--------------------------------|
| 216497_PM_at    | HNRNPA1 ///<br>HNRNPA1L2 ///<br>HNRNPA1P10 ///<br>HNRPA1P5 ///<br>LOC642817 | heterogeneous nuclear<br>ribonucleoprotein A1 /// heterogeneous<br>nuclear ribonucleoprotein  | 0.00275 | 1.25  | Normal up vs Off IS Tolerant   |
| 222026_PM_at    | RBM3                                                                        | RNA binding motif (RNP1, RRM) protein 3                                                       | 0.00275 | 1.62  | Normal up vs Off IS Tolerant   |
| 229357_PM_at    | ADAMTS5                                                                     | ADAM metalloproteinase with<br>thrombospondin type 1 motif, 5                                 | 0.00276 | -1.38 | Normal down vs Off IS Tolerant |
| 240916_PM_x_at  | ---                                                                         | ---                                                                                           | 0.00276 | -1.22 | Normal down vs Off IS Tolerant |
| 203991_PM_s_at  | KDM6A                                                                       | lysine (K)-specific demethylase 6A                                                            | 0.00276 | 1.49  | Normal up vs Off IS Tolerant   |
| 210272_PM_at    | CYP2B7P1                                                                    | cytochrome P450, family 2, subfamily B,<br>polypeptide 7 pseudogene 1                         | 0.00276 | -1.35 | Normal down vs Off IS Tolerant |
| 227755_PM_at    | ---                                                                         | ---                                                                                           | 0.00276 | 1.42  | Normal up vs Off IS Tolerant   |
| 220400_PM_at    | VPS13B                                                                      | vacuolar protein sorting 13 homolog B<br>(yeast)                                              | 0.00276 | 1.25  | Normal up vs Off IS Tolerant   |
| 241164_PM_at    | ---                                                                         | ---                                                                                           | 0.00276 | -1.44 | Normal down vs Off IS Tolerant |
| 58900_PM_at     | UBE2D4                                                                      | ubiquitin-conjugating enzyme E2D 4<br>(putative)                                              | 0.00277 | -1.42 | Normal down vs Off IS Tolerant |
| 235936_PM_at    | LOC254559                                                                   | hypothetical LOC254559                                                                        | 0.00277 | -1.18 | Normal down vs Off IS Tolerant |
| 218532_PM_s_at  | FAM134B                                                                     | family with sequence similarity 134,<br>member B                                              | 0.00277 | 1.72  | Normal up vs Off IS Tolerant   |
| 1552322_PM_at   | FAM122C                                                                     | family with sequence similarity 122C                                                          | 0.00277 | 1.27  | Normal up vs Off IS Tolerant   |
| 201240_PM_s_at  | LOC653566 ///<br>SPCS2                                                      | signal peptidase complex subunit 2<br>homolog pseudogene /// signal<br>peptidase complex subu | 0.00277 | -1.35 | Normal down vs Off IS Tolerant |
| 211810_PM_s_at  | GALC                                                                        | galactosylceramidase                                                                          | 0.00277 | 1.89  | Normal up vs Off IS Tolerant   |
| 201481_PM_s_at  | PYGB                                                                        | phosphorylase, glycogen; brain                                                                | 0.00277 | 1.32  | Normal up vs Off IS Tolerant   |
| 1553502_PM_a_at | PALM2                                                                       | paralemmin 2                                                                                  | 0.00277 | -1.27 | Normal down vs Off IS Tolerant |
| 207327_PM_at    | EYA4                                                                        | eyes absent homolog 4 (Drosophila)                                                            | 0.00278 | -1.24 | Normal down vs Off IS Tolerant |

|                |           |                                                                |         |       |                                |
|----------------|-----------|----------------------------------------------------------------|---------|-------|--------------------------------|
| 1556553_PM_at  | ---       | ---                                                            | 0.00278 | -1.26 | Normal down vs Off IS Tolerant |
| 221961_PM_at   | CLCN7     | chloride channel 7                                             | 0.00279 | 1.44  | Normal up vs Off IS Tolerant   |
| 233020_PM_at   | ---       | ---                                                            | 0.00279 | -1.32 | Normal down vs Off IS Tolerant |
| 210910_PM_s_at | POMZP3    | POM121 and ZP3 fusion                                          | 0.00280 | 1.76  | Normal up vs Off IS Tolerant   |
| 213199_PM_at   | C2CD3     | C2 calcium-dependent domain containing 3                       | 0.00280 | 1.28  | Normal up vs Off IS Tolerant   |
| 215739_PM_s_at | TUBGCP3   | tubulin, gamma complex associated protein 3                    | 0.00280 | 1.56  | Normal up vs Off IS Tolerant   |
| 217843_PM_s_at | MED4      | mediator complex subunit 4                                     | 0.00280 | 1.26  | Normal up vs Off IS Tolerant   |
| 202037_PM_s_at | SFRP1     | secreted frizzled-related protein 1                            | 0.00280 | -1.25 | Normal down vs Off IS Tolerant |
| 202985_PM_s_at | BAG5      | BCL2-associated athanogene 5                                   | 0.00280 | 1.29  | Normal up vs Off IS Tolerant   |
| 213208_PM_at   | KIAA0240  | KIAA0240                                                       | 0.00280 | 1.41  | Normal up vs Off IS Tolerant   |
| 218795_PM_at   | ACP6      | acid phosphatase 6, lysophosphatidic                           | 0.00280 | 1.76  | Normal up vs Off IS Tolerant   |
| 204645_PM_at   | CCNT2     | cyclin T2                                                      | 0.00280 | 1.75  | Normal up vs Off IS Tolerant   |
| 213533_PM_at   | D4S234E   | DNA segment on chromosome 4 (unique)<br>234 expressed sequence | 0.00280 | 1.57  | Normal up vs Off IS Tolerant   |
| 221287_PM_at   | RNASEL    | ribonuclease L (2',5'-oligoadenylate synthetase-dependent)     | 0.00281 | -1.30 | Normal down vs Off IS Tolerant |
| 234067_PM_at   | ---       | ---                                                            | 0.00281 | -1.75 | Normal down vs Off IS Tolerant |
| 225238_PM_at   | MSI2      | musashi homolog 2 (Drosophila)                                 | 0.00281 | 1.55  | Normal up vs Off IS Tolerant   |
| 224620_PM_at   | MAPK1     | mitogen-activated protein kinase 1                             | 0.00281 | -1.35 | Normal down vs Off IS Tolerant |
| 1558791_PM_at  | LOC286467 | hypothetical LOC286467                                         | 0.00281 | -1.38 | Normal down vs Off IS Tolerant |
| 231360_PM_at   | C20orf141 | chromosome 20 open reading frame 141                           | 0.00281 | -1.28 | Normal down vs Off IS Tolerant |
| 208820_PM_at   | PTK2      | PTK2 protein tyrosine kinase 2                                 | 0.00282 | 1.49  | Normal up vs Off IS Tolerant   |
| 202848_PM_s_at | GRK6      | G protein-coupled receptor kinase 6                            | 0.00282 | 1.26  | Normal up vs Off IS Tolerant   |
| 235626_PM_at   | CAMK1D    | calcium/calmodulin-dependent protein kinase ID                 | 0.00282 | 1.41  | Normal up vs Off IS Tolerant   |

|                 |              |                                                                                         |         |       |                                |
|-----------------|--------------|-----------------------------------------------------------------------------------------|---------|-------|--------------------------------|
| 1570257_PM_x_at | ---          | ---                                                                                     | 0.00282 | -1.35 | Normal down vs Off IS Tolerant |
| 231073_PM_at    | C1orf168     | chromosome 1 open reading frame 168                                                     | 0.00282 | -1.23 | Normal down vs Off IS Tolerant |
| 220651_PM_s_at  | MCM10        | minichromosome maintenance complex component 10                                         | 0.00282 | -1.26 | Normal down vs Off IS Tolerant |
| 209415_PM_at    | FZR1         | fizzy/cell division cycle 20 related 1 (Drosophila)                                     | 0.00283 | -1.37 | Normal down vs Off IS Tolerant |
| 1570644_PM_at   | ---          | ---                                                                                     | 0.00283 | -1.38 | Normal down vs Off IS Tolerant |
| 218434_PM_s_at  | AACS         | acetoacetyl-CoA synthetase                                                              | 0.00283 | 1.36  | Normal up vs Off IS Tolerant   |
| 242232_PM_at    | ---          | ---                                                                                     | 0.00284 | -2.00 | Normal down vs Off IS Tolerant |
| 222642_PM_s_at  | TMEM33       | transmembrane protein 33                                                                | 0.00284 | -1.48 | Normal down vs Off IS Tolerant |
| 211658_PM_at    | PRDX2        | peroxiredoxin 2                                                                         | 0.00284 | 1.70  | Normal up vs Off IS Tolerant   |
| 207580_PM_at    | MAGEB4       | melanoma antigen family B, 4                                                            | 0.00284 | -1.29 | Normal down vs Off IS Tolerant |
| 209255_PM_at    | KLHDC10      | kelch domain containing 10                                                              | 0.00285 | -1.76 | Normal down vs Off IS Tolerant |
| 213666_PM_at    | 6-Sep        | septin 6                                                                                | 0.00285 | 1.50  | Normal up vs Off IS Tolerant   |
| 1561137_PM_s_at | GYPE         | glycophorin E (MNS blood group)                                                         | 0.00286 | -1.29 | Normal down vs Off IS Tolerant |
| 202148_PM_s_at  | PYCR1        | pyrroline-5-carboxylate reductase 1                                                     | 0.00286 | -1.39 | Normal down vs Off IS Tolerant |
| 240074_PM_at    | ---          | ---                                                                                     | 0.00286 | -1.19 | Normal down vs Off IS Tolerant |
| 205836_PM_s_at  | YTHDC2       | YTH domain containing 2                                                                 | 0.00286 | 1.60  | Normal up vs Off IS Tolerant   |
| 1562879_PM_at   | ---          | ---                                                                                     | 0.00286 | -1.49 | Normal down vs Off IS Tolerant |
| 228971_PM_at    | LOC100505759 | hypothetical LOC100505759                                                               | 0.00286 | 1.33  | Normal up vs Off IS Tolerant   |
| 219271_PM_at    | GALNT14      | UDP-N-acetyl-alpha-D-galactosamine:polypeptide N-acetylgalactosaminyltransferase 14 (Ga | 0.00287 | -1.31 | Normal down vs Off IS Tolerant |



|                |              |                                                                                         |         |       |                                |
|----------------|--------------|-----------------------------------------------------------------------------------------|---------|-------|--------------------------------|
| 229579_PM_s_at | DISP2        | dispatched homolog 2 (Drosophila)                                                       | 0.00287 | -1.21 | Normal down vs Off IS Tolerant |
| 244441_PM_at   | ---          | ---                                                                                     | 0.00287 | -1.32 | Normal down vs Off IS Tolerant |
| 244042_PM_x_at | ---          | ---                                                                                     | 0.00287 | -3.59 | Normal down vs Off IS Tolerant |
| 230615_PM_at   | DUOXA2       | dual oxidase maturation factor 2                                                        | 0.00287 | -1.34 | Normal down vs Off IS Tolerant |
| 1561096_PM_at  | LOC285419    | hypothetical LOC285419                                                                  | 0.00287 | -1.45 | Normal down vs Off IS Tolerant |
| 238829_PM_at   | ---          | ---                                                                                     | 0.00287 | 1.62  | Normal up vs Off IS Tolerant   |
| 1564401_PM_at  | LOC400748    | hypothetical LOC400748                                                                  | 0.00287 | -1.19 | Normal down vs Off IS Tolerant |
| 1555895_PM_at  | DNM2         | dynamin 2                                                                               | 0.00288 | 1.52  | Normal up vs Off IS Tolerant   |
| 211743_PM_s_at | PRG2         | proteoglycan 2, bone marrow (natural killer cell activator, eosinophil granule major ba | 0.00289 | -1.23 | Normal down vs Off IS Tolerant |
| 211953_PM_s_at | IPO5         | importin 5                                                                              | 0.00289 | 1.54  | Normal up vs Off IS Tolerant   |
| 203066_PM_at   | CHST15       | carbohydrate (N-acetylgalactosamine 4-sulfate 6-O) sulfotransferase 15                  | 0.00289 | -1.51 | Normal down vs Off IS Tolerant |
| 218663_PM_at   | NCAPG        | non-SMC condensin I complex, subunit G                                                  | 0.00289 | -1.42 | Normal down vs Off IS Tolerant |
| 240058_PM_at   | LOC100129597 | hypothetical LOC100129597                                                               | 0.00289 | -1.39 | Normal down vs Off IS Tolerant |
| 238325_PM_s_at | ODF3B        | outer dense fiber of sperm tails 3B                                                     | 0.00289 | -1.41 | Normal down vs Off IS Tolerant |
| 208184_PM_s_at | TRAPPC10     | trafficking protein particle complex 10                                                 | 0.00289 | 1.29  | Normal up vs Off IS Tolerant   |
| 243859_PM_at   | ---          | ---                                                                                     | 0.00289 | 1.27  | Normal up vs Off IS Tolerant   |
| 1563252_PM_at  | ERBB3        | v-erb-b2 erythroblastic leukemia viral oncogene homolog 3 (avian)                       | 0.00290 | -1.21 | Normal down vs Off IS Tolerant |
| 200849_PM_s_at | AHCYL1       | adenosylhomocysteinase-like 1                                                           | 0.00290 | -1.29 | Normal down vs Off IS Tolerant |
| 226670_PM_s_at | PABPC1L      | poly(A) binding protein, cytoplasmic 1-like                                             | 0.00290 | 1.52  | Normal up vs Off IS Tolerant   |

|                |                       |                                                                             |         |       |                                |
|----------------|-----------------------|-----------------------------------------------------------------------------|---------|-------|--------------------------------|
| 240398_PM_at   | ---                   | ---                                                                         | 0.00291 | -1.27 | Normal down vs Off IS Tolerant |
| 234284_PM_at   | GNG8                  | guanine nucleotide binding protein (G protein), gamma 8                     | 0.00291 | 1.55  | Normal up vs Off IS Tolerant   |
| 216430_PM_x_at | IGLV1-40 /// IGLV1-44 | immunoglobulin lambda variable 1-40 /// immunoglobulin lambda variable 1-44 | 0.00291 | -1.46 | Normal down vs Off IS Tolerant |
| 203800_PM_s_at | MRPS14                | mitochondrial ribosomal protein S14                                         | 0.00291 | -1.66 | Normal down vs Off IS Tolerant |
| 217138_PM_x_at | ---                   | ---                                                                         | 0.00292 | -1.21 | Normal down vs Off IS Tolerant |
| 241748_PM_x_at | DGCR14                | DiGeorge syndrome critical region gene 14                                   | 0.00292 | -1.31 | Normal down vs Off IS Tolerant |
| 220740_PM_s_at | SLC12A6               | solute carrier family 12 (potassium/chloride transporters), member 6        | 0.00292 | 1.81  | Normal up vs Off IS Tolerant   |
| 228296_PM_at   | YPEL1                 | yippee-like 1 (Drosophila)                                                  | 0.00292 | 1.47  | Normal up vs Off IS Tolerant   |
| 205066_PM_s_at | ENPP1                 | ectonucleotide pyrophosphatase/phosphodiesterase 1                          | 0.00292 | -1.43 | Normal down vs Off IS Tolerant |
| 218612_PM_s_at | TSSC4                 | tumor suppressing subtransferable candidate 4                               | 0.00292 | 1.34  | Normal up vs Off IS Tolerant   |
| 231288_PM_at   | CCDC88C               | coiled-coil domain containing 88C                                           | 0.00293 | 1.49  | Normal up vs Off IS Tolerant   |
| 228805_PM_at   | C5orf25               | chromosome 5 open reading frame 25                                          | 0.00293 | 1.67  | Normal up vs Off IS Tolerant   |
| 218114_PM_at   | GGA1                  | golgi-associated, gamma adaptin ear containing, ARF binding protein 1       | 0.00293 | 1.32  | Normal up vs Off IS Tolerant   |
| 212061_PM_at   | SR140                 | U2-associated SR140 protein                                                 | 0.00293 | 1.30  | Normal up vs Off IS Tolerant   |
| 1561088_PM_at  | EYA4                  | eyes absent homolog 4 (Drosophila)                                          | 0.00294 | -1.52 | Normal down vs Off IS Tolerant |
| 1560013_PM_at  | PDXDC1                | pyridoxal-dependent decarboxylase domain containing 1                       | 0.00294 | 1.89  | Normal up vs Off IS Tolerant   |
| 203981_PM_s_at | ABCD4                 | ATP-binding cassette, sub-family D (ALD), member 4                          | 0.00295 | 1.38  | Normal up vs Off IS Tolerant   |
| 239311_PM_at   | ---                   | ---                                                                         | 0.00295 | 1.45  | Normal up vs Off IS Tolerant   |

|                 |           |                                                                           |         |       |                                |
|-----------------|-----------|---------------------------------------------------------------------------|---------|-------|--------------------------------|
| 213167_PM_s_at  | SLC5A3    | solute carrier family 5 (sodium/myo-<br>inositol cotransporter), member 3 | 0.00295 | -1.23 | Normal down vs Off IS Tolerant |
| 218865_PM_at    | MOSC1     | MOCO sulphurase C-terminal domain<br>containing 1                         | 0.00295 | -1.83 | Normal down vs Off IS Tolerant |
| 203515_PM_s_at  | PMVK      | phosphomevalonate kinase                                                  | 0.00295 | -1.46 | Normal down vs Off IS Tolerant |
| 210625_PM_s_at  | AKAP1     | A kinase (PRKA) anchor protein 1                                          | 0.00295 | 1.55  | Normal up vs Off IS Tolerant   |
| 204453_PM_at    | ZNF84     | zinc finger protein 84                                                    | 0.00295 | 1.79  | Normal up vs Off IS Tolerant   |
| 214305_PM_s_at  | SF3B1     | splicing factor 3b, subunit 1, 155kDa                                     | 0.00295 | -1.33 | Normal down vs Off IS Tolerant |
| 222578_PM_s_at  | UBA5      | ubiquitin-like modifier activating enzyme<br>5                            | 0.00295 | 1.45  | Normal up vs Off IS Tolerant   |
| 237005_PM_at    | LOC442075 | hypothetical LOC442075                                                    | 0.00296 | 1.44  | Normal up vs Off IS Tolerant   |
| 1563370_PM_at   | ---       | ---                                                                       | 0.00296 | 1.22  | Normal up vs Off IS Tolerant   |
| 224288_PM_x_at  | FKSG49    | FKSG49                                                                    | 0.00296 | -1.83 | Normal down vs Off IS Tolerant |
| 244431_PM_at    | KILLIN    | killin protein                                                            | 0.00296 | -1.29 | Normal down vs Off IS Tolerant |
| 1553677_PM_a_at | TIPRL     | TIP41, TOR signaling pathway regulator-<br>like ( <i>S. cerevisiae</i> )  | 0.00296 | -1.47 | Normal down vs Off IS Tolerant |
| 209334_PM_s_at  | PSMD9     | proteasome (prosome, macropain) 26S<br>subunit, non-ATPase, 9             | 0.00297 | 1.51  | Normal up vs Off IS Tolerant   |
| 226120_PM_at    | TTC8      | tetratricopeptide repeat domain 8                                         | 0.00297 | 1.27  | Normal up vs Off IS Tolerant   |
| 209356_PM_x_at  | EFEMP2    | EGF-containing fibulin-like extracellular<br>matrix protein 2             | 0.00297 | 1.26  | Normal up vs Off IS Tolerant   |
| 1566825_PM_at   | ---       | ---                                                                       | 0.00297 | -1.70 | Normal down vs Off IS Tolerant |
| 242612_PM_at    | ---       | ---                                                                       | 0.00298 | 1.56  | Normal up vs Off IS Tolerant   |
| 218035_PM_s_at  | RBM47     | RNA binding motif protein 47                                              | 0.00298 | -1.52 | Normal down vs Off IS Tolerant |
| 201365_PM_at    | OAZ2      | ornithine decarboxylase antizyme 2                                        | 0.00298 | -1.62 | Normal down vs Off IS Tolerant |
| 224579_PM_at    | SLC38A1   | solute carrier family 38, member 1                                        | 0.00298 | 1.46  | Normal up vs Off IS Tolerant   |
| 1564083_PM_at   | ---       | ---                                                                       | 0.00298 | -1.44 | Normal down vs Off IS Tolerant |

|                 |                            |                                                                                  |         |       |                                |
|-----------------|----------------------------|----------------------------------------------------------------------------------|---------|-------|--------------------------------|
| 233629_PM_at    | ---                        | ---                                                                              | 0.00298 | -1.26 | Normal down vs Off IS Tolerant |
| 221104_PM_s_at  | NIPSNAP3B                  | nipsnap homolog 3B (C. elegans)                                                  | 0.00298 | -2.29 | Normal down vs Off IS Tolerant |
| 235394_PM_at    | PLAA                       | phospholipase A2-activating protein                                              | 0.00299 | 1.53  | Normal up vs Off IS Tolerant   |
| 1554703_PM_at   | ARHGEF10                   | Rho guanine nucleotide exchange factor (GEF) 10                                  | 0.00299 | 1.44  | Normal up vs Off IS Tolerant   |
| 202229_PM_s_at  | CHERP                      | calcium homeostasis endoplasmic reticulum protein                                | 0.00299 | -1.26 | Normal down vs Off IS Tolerant |
| 240392_PM_at    | ---                        | ---                                                                              | 0.00299 | 1.68  | Normal up vs Off IS Tolerant   |
| 1558202_PM_at   | LOC145783                  | hypothetical LOC145783                                                           | 0.00299 | -1.56 | Normal down vs Off IS Tolerant |
| 222276_PM_at    | METTL2B                    | methyltransferase like 2B                                                        | 0.00299 | 1.32  | Normal up vs Off IS Tolerant   |
| 202874_PM_s_at  | ATP6V1C1                   | ATPase, H+ transporting, lysosomal 42kDa, V1 subunit C1                          | 0.00299 | -1.73 | Normal down vs Off IS Tolerant |
| 235112_PM_at    | ---                        | ---                                                                              | 0.00299 | -1.62 | Normal down vs Off IS Tolerant |
| 43511_PM_s_at   | ---                        | ---                                                                              | 0.00300 | 1.31  | Normal up vs Off IS Tolerant   |
| 203449_PM_s_at  | TERF1                      | telomeric repeat binding factor (NIMA-interacting) 1                             | 0.00301 | 1.41  | Normal up vs Off IS Tolerant   |
| 220482_PM_s_at  | SERGEF                     | secretion regulating guanine nucleotide exchange factor                          | 0.00301 | 1.39  | Normal up vs Off IS Tolerant   |
| AFFX-BioB-3_at  | ---                        | ---                                                                              | 0.00302 | -2.02 | Normal down vs Off IS Tolerant |
| 1555487_PM_a_at | ACTR3B ///<br>LOC100290215 | ARP3 actin-related protein 3 homolog B (yeast) /// actin-related protein 3B-like | 0.00302 | 1.24  | Normal up vs Off IS Tolerant   |
| 237875_PM_at    | ---                        | ---                                                                              | 0.00302 | -1.84 | Normal down vs Off IS Tolerant |
| 223227_PM_at    | BBS2                       | Bardet-Biedl syndrome 2                                                          | 0.00302 | 1.61  | Normal up vs Off IS Tolerant   |
| 233438_PM_at    | C6orf162                   | Chromosome 6 open reading frame 162                                              | 0.00302 | 1.29  | Normal up vs Off IS Tolerant   |
| 230264_PM_s_at  | AP1S2                      | adaptor-related protein complex 1, sigma 2 subunit                               | 0.00302 | -1.32 | Normal down vs Off IS Tolerant |

|                 |          |                                                                                         |         |       |                                |
|-----------------|----------|-----------------------------------------------------------------------------------------|---------|-------|--------------------------------|
| 1558295_PM_a_at | PPFIA2   | protein tyrosine phosphatase, receptor type, f polypeptide (PTPRF), interacting protein | 0.00302 | -1.38 | Normal down vs Off IS Tolerant |
| 235348_PM_at    | ABHD13   | abhydrolase domain containing 13                                                        | 0.00302 | 1.68  | Normal up vs Off IS Tolerant   |
| 223950_PM_s_at  | FLYWCH1  | FLYWCH-type zinc finger 1                                                               | 0.00303 | 1.65  | Normal up vs Off IS Tolerant   |
| 214370_PM_at    | S100A8   | S100 calcium binding protein A8                                                         | 0.00303 | -1.89 | Normal down vs Off IS Tolerant |
| 240037_PM_at    | ITPRIPL1 | inositol 1,4,5-triphosphate receptor interacting protein-like 1                         | 0.00303 | 1.33  | Normal up vs Off IS Tolerant   |
| 1566146_PM_x_at | ---      | ---                                                                                     | 0.00303 | -2.21 | Normal down vs Off IS Tolerant |
| 223005_PM_s_at  | C9orf5   | chromosome 9 open reading frame 5                                                       | 0.00303 | 1.51  | Normal up vs Off IS Tolerant   |
| 223674_PM_s_at  | CDC42SE1 | CDC42 small effector 1                                                                  | 0.00304 | 1.94  | Normal up vs Off IS Tolerant   |
| 229617_PM_x_at  | AP2A1    | adaptor-related protein complex 2, alpha 1 subunit                                      | 0.00304 | -1.41 | Normal down vs Off IS Tolerant |
| 201617_PM_x_at  | CALD1    | caldesmon 1                                                                             | 0.00304 | 1.24  | Normal up vs Off IS Tolerant   |
| 209855_PM_s_at  | KLK2     | kallikrein-related peptidase 2                                                          | 0.00304 | -1.43 | Normal down vs Off IS Tolerant |
| 47608_PM_at     | TJAP1    | tight junction associated protein 1 (peripheral)                                        | 0.00304 | 1.21  | Normal up vs Off IS Tolerant   |
| 218808_PM_at    | DALRD3   | DALR anticodon binding domain containing 3                                              | 0.00304 | 1.40  | Normal up vs Off IS Tolerant   |
| 223540_PM_at    | PVRL4    | poliovirus receptor-related 4                                                           | 0.00304 | -1.21 | Normal down vs Off IS Tolerant |
| 1558922_PM_at   | ---      | ---                                                                                     | 0.00305 | 1.71  | Normal up vs Off IS Tolerant   |
| 239176_PM_at    | ---      | ---                                                                                     | 0.00305 | -1.32 | Normal down vs Off IS Tolerant |
| 1570222_PM_at   | NDST4    | N-deacetylase/N-sulfotransferase (heparan glucosaminyl) 4                               | 0.00305 | -1.62 | Normal down vs Off IS Tolerant |
| 221983_PM_at    | FAM134A  | family with sequence similarity 134, member A                                           | 0.00305 | 1.35  | Normal up vs Off IS Tolerant   |
| 219829_PM_at    | ITGB1BP2 | integrin beta 1 binding protein (melusin) 2                                             | 0.00305 | 1.24  | Normal up vs Off IS Tolerant   |
| 227186_PM_s_at  | MRPL41   | mitochondrial ribosomal protein L41                                                     | 0.00306 | 1.27  | Normal up vs Off IS Tolerant   |

|                |         |                                                                                 |         |       |                                |
|----------------|---------|---------------------------------------------------------------------------------|---------|-------|--------------------------------|
| 231090_PM_s_at | ARID2   | AT rich interactive domain 2 (ARID, RFX-like)                                   | 0.00306 | 1.36  | Normal up vs Off IS Tolerant   |
| 241971_PM_at   | ---     | ---                                                                             | 0.00306 | -1.22 | Normal down vs Off IS Tolerant |
| 233274_PM_at   | ---     | ---                                                                             | 0.00306 | 1.36  | Normal up vs Off IS Tolerant   |
| 232019_PM_at   | ZKSCAN2 | zinc finger with KRAB and SCAN domains 2                                        | 0.00307 | 1.27  | Normal up vs Off IS Tolerant   |
| 220709_PM_at   | ZNF556  | zinc finger protein 556                                                         | 0.00307 | -1.22 | Normal down vs Off IS Tolerant |
| 241077_PM_at   | ---     | ---                                                                             | 0.00307 | -1.89 | Normal down vs Off IS Tolerant |
| 227947_PM_at   | PHACTR2 | phosphatase and actin regulator 2                                               | 0.00307 | 1.47  | Normal up vs Off IS Tolerant   |
| 204297_PM_at   | PIK3C3  | phosphoinositide-3-kinase, class 3                                              | 0.00307 | -1.25 | Normal down vs Off IS Tolerant |
| 1556385_PM_at  | ---     | ---                                                                             | 0.00307 | 1.75  | Normal up vs Off IS Tolerant   |
| 205382_PM_s_at | CFD     | complement factor D (adipsin)                                                   | 0.00308 | -1.60 | Normal down vs Off IS Tolerant |
| 227844_PM_at   | FMNL3   | formin-like 3                                                                   | 0.00308 | 1.37  | Normal up vs Off IS Tolerant   |
| 214689_PM_at   | PAPPA2  | pappalysin 2                                                                    | 0.00308 | -1.25 | Normal down vs Off IS Tolerant |
| 225268_PM_at   | KPNA4   | karyopherin alpha 4 (importin alpha 3)                                          | 0.00308 | 1.35  | Normal up vs Off IS Tolerant   |
| 213166_PM_x_at | MZT2A   | mitotic spindle organizing protein 2A                                           | 0.00308 | 1.40  | Normal up vs Off IS Tolerant   |
| 214088_PM_s_at | FUT3    | fucosyltransferase 3 (galactoside 3(4)-L-fucosyltransferase, Lewis blood group) | 0.00308 | -1.26 | Normal down vs Off IS Tolerant |
| 1563522_PM_at  | DDX10   | DEAD (Asp-Glu-Ala-Asp) box polypeptide 10                                       | 0.00309 | -1.56 | Normal down vs Off IS Tolerant |
| 208754_PM_s_at | NAP1L1  | nucleosome assembly protein 1-like 1                                            | 0.00309 | 1.28  | Normal up vs Off IS Tolerant   |
| 1562939_PM_at  | LRRC16A | leucine rich repeat containing 16A                                              | 0.00309 | -1.54 | Normal down vs Off IS Tolerant |
| 206253_PM_at   | DLG2    | discs, large homolog 2 (Drosophila)                                             | 0.00310 | -1.27 | Normal down vs Off IS Tolerant |
| 218079_PM_s_at | GGNBP2  | gametogenetin binding protein 2                                                 | 0.00310 | 1.22  | Normal up vs Off IS Tolerant   |
| 205318_PM_at   | KIF5A   | kinesin family member 5A                                                        | 0.00310 | -1.25 | Normal down vs Off IS Tolerant |

|                 |          |                                                                              |         |       |                                |
|-----------------|----------|------------------------------------------------------------------------------|---------|-------|--------------------------------|
| 229601_PM_at    | SCYL1    | SCY1-like 1 ( <i>S. cerevisiae</i> )                                         | 0.00310 | -1.23 | Normal down vs Off IS Tolerant |
| 221207_PM_s_at  | NBEA     | neurobeachin                                                                 | 0.00310 | 1.38  | Normal up vs Off IS Tolerant   |
| 1555135_PM_at   | ---      | ---                                                                          | 0.00310 | -1.27 | Normal down vs Off IS Tolerant |
| 232744_PM_x_at  | ---      | ---                                                                          | 0.00311 | 1.88  | Normal up vs Off IS Tolerant   |
| 209397_PM_at    | ME2      | malic enzyme 2, NAD(+)-dependent, mitochondrial                              | 0.00311 | -1.38 | Normal down vs Off IS Tolerant |
| 209451_PM_at    | TANK     | TRAF family member-associated NFKB activator                                 | 0.00311 | 1.25  | Normal up vs Off IS Tolerant   |
| 217883_PM_at    | MMADHC   | methylmalonic aciduria (cobalamin deficiency) cbID type, with homocystinuria | 0.00312 | 1.23  | Normal up vs Off IS Tolerant   |
| 244474_PM_at    | ---      | ---                                                                          | 0.00312 | 1.55  | Normal up vs Off IS Tolerant   |
| 209594_PM_x_at  | PSG9     | pregnancy specific beta-1-glycoprotein 9                                     | 0.00312 | -1.24 | Normal down vs Off IS Tolerant |
| 226641_PM_at    | ANKRD44  | ankyrin repeat domain 44                                                     | 0.00312 | 1.24  | Normal up vs Off IS Tolerant   |
| 222736_PM_s_at  | TMEM38B  | transmembrane protein 38B                                                    | 0.00312 | 1.43  | Normal up vs Off IS Tolerant   |
| 214731_PM_at    | ---      | ---                                                                          | 0.00312 | 1.82  | Normal up vs Off IS Tolerant   |
| 234304_PM_s_at  | IPO11    | importin 11                                                                  | 0.00312 | 1.45  | Normal up vs Off IS Tolerant   |
| 232819_PM_s_at  | LTBR     | Lymphotoxin beta receptor (TNFR superfamily, member 3)                       | 0.00312 | -1.32 | Normal down vs Off IS Tolerant |
| 214363_PM_s_at  | MATR3    | matrin 3                                                                     | 0.00312 | 1.16  | Normal up vs Off IS Tolerant   |
| 238807_PM_at    | GAPDHP62 | glyceraldehyde 3 phosphate dehydrogenase pseudogene 62                       | 0.00313 | 1.58  | Normal up vs Off IS Tolerant   |
| 1555505_PM_a_at | TYR      | tyrosinase (oculocutaneous albinism IA)                                      | 0.00313 | -1.49 | Normal down vs Off IS Tolerant |
| 214976_PM_at    | RPL13    | ribosomal protein L13                                                        | 0.00313 | 1.40  | Normal up vs Off IS Tolerant   |
| 207761_PM_s_at  | METTL7A  | methyltransferase like 7A                                                    | 0.00313 | -1.50 | Normal down vs Off IS Tolerant |
| 225984_PM_at    | PRKAA1   | protein kinase, AMP-activated, alpha 1 catalytic subunit                     | 0.00313 | 1.38  | Normal up vs Off IS Tolerant   |
| 226453_PM_at    | RNASEH2C | ribonuclease H2, subunit C                                                   | 0.00313 | -1.33 | Normal down vs Off IS Tolerant |

|                |                 |                                                                                         |         |       |                                |
|----------------|-----------------|-----------------------------------------------------------------------------------------|---------|-------|--------------------------------|
| 211442_PM_x_at | CYP3A43         | cytochrome P450, family 3, subfamily A, polypeptide 43                                  | 0.00314 | -1.28 | Normal down vs Off IS Tolerant |
| 237179_PM_at   | PCMTD2          | protein-L-isoaspartate (D-aspartate) O-methyltransferase domain containing 2            | 0.00314 | 1.44  | Normal up vs Off IS Tolerant   |
| 222093_PM_s_at | INO80B          | INO80 complex subunit B                                                                 | 0.00314 | -1.44 | Normal down vs Off IS Tolerant |
| 203131_PM_at   | PDGFRA          | platelet-derived growth factor receptor, alpha polypeptide                              | 0.00314 | -1.29 | Normal down vs Off IS Tolerant |
| 233191_PM_at   | RUFY2           | RUN and FYVE domain containing 2                                                        | 0.00314 | 1.39  | Normal up vs Off IS Tolerant   |
| 203657_PM_s_at | CTSF            | cathepsin F                                                                             | 0.00314 | 1.28  | Normal up vs Off IS Tolerant   |
| 243566_PM_at   | LOC100506238    | hypothetical LOC100506238                                                               | 0.00314 | -2.36 | Normal down vs Off IS Tolerant |
| 205056_PM_s_at | GPR162          | G protein-coupled receptor 162                                                          | 0.00314 | -1.31 | Normal down vs Off IS Tolerant |
| 234297_PM_at   | RGS8 /// SDHAP3 | Regulator of G-protein signaling 8 /// Succinate dehydrogenase complex, subunit A, flav | 0.00315 | 1.57  | Normal up vs Off IS Tolerant   |
| 221729_PM_at   | COL5A2          | collagen, type V, alpha 2                                                               | 0.00315 | -1.52 | Normal down vs Off IS Tolerant |
| 244286_PM_at   | ---             | ---                                                                                     | 0.00315 | 1.67  | Normal up vs Off IS Tolerant   |
| 238425_PM_at   | ---             | ---                                                                                     | 0.00315 | 1.49  | Normal up vs Off IS Tolerant   |
| 229111_PM_at   | ---             | ---                                                                                     | 0.00315 | 1.54  | Normal up vs Off IS Tolerant   |
| 217853_PM_at   | TNS3            | tensin 3                                                                                | 0.00315 | -1.37 | Normal down vs Off IS Tolerant |
| 242445_PM_at   | FGD4            | FYVE, RhoGEF and PH domain containing 4                                                 | 0.00316 | -1.24 | Normal down vs Off IS Tolerant |
| 224832_PM_at   | DUSP16          | dual specificity phosphatase 16                                                         | 0.00316 | 1.62  | Normal up vs Off IS Tolerant   |
| 208407_PM_s_at | CTNND1          | catenin (cadherin-associated protein), delta 1                                          | 0.00317 | -1.63 | Normal down vs Off IS Tolerant |
| 1556387_PM_at  | ---             | ---                                                                                     | 0.00317 | -1.32 | Normal down vs Off IS Tolerant |
| 203658_PM_at   | SLC25A20        | solute carrier family 25 (carnitine/acylcarnitine translocase), member 20               | 0.00317 | -1.90 | Normal down vs Off IS Tolerant |



|                |                                 |                                                                                        |         |       |                                |
|----------------|---------------------------------|----------------------------------------------------------------------------------------|---------|-------|--------------------------------|
| 209357_PM_at   | CITED2                          | Cbp/p300-interacting transactivator, with Glu/Asp-rich carboxy-terminal domain, 2      | 0.00317 | 1.73  | Normal up vs Off IS Tolerant   |
| 1569817_PM_at  | LOC644620                       | Hypothetical LOC644620                                                                 | 0.00317 | -1.30 | Normal down vs Off IS Tolerant |
| 1561155_PM_at  | ---                             | ---                                                                                    | 0.00317 | 1.50  | Normal up vs Off IS Tolerant   |
| 222126_PM_at   | AGFG2                           | ArfGAP with FG repeats 2                                                               | 0.00317 | 1.53  | Normal up vs Off IS Tolerant   |
| 202587_PM_s_at | AK1                             | adenylate kinase 1                                                                     | 0.00317 | 1.70  | Normal up vs Off IS Tolerant   |
| 208281_PM_x_at | DAZ1 /// DAZ2 /// DAZ3 /// DAZ4 | deleted in azoospermia 1 /// deleted in azoospermia 2 /// deleted in azoospermia 3 /// | 0.00317 | -2.23 | Normal down vs Off IS Tolerant |
| 232527_PM_at   | ---                             | ---                                                                                    | 0.00317 | 1.44  | Normal up vs Off IS Tolerant   |
| 222646_PM_s_at | ERO1L                           | ERO1-like ( <i>S. cerevisiae</i> )                                                     | 0.00318 | 1.61  | Normal up vs Off IS Tolerant   |
| 221243_PM_s_at | ---                             | ---                                                                                    | 0.00318 | -1.26 | Normal down vs Off IS Tolerant |
| 223051_PM_at   | SSU72                           | SSU72 RNA polymerase II CTD phosphatase homolog ( <i>S. cerevisiae</i> )               | 0.00318 | 1.25  | Normal up vs Off IS Tolerant   |
| 1562608_PM_at  | ---                             | ---                                                                                    | 0.00318 | -1.65 | Normal down vs Off IS Tolerant |
| 207974_PM_s_at | SKP1                            | S-phase kinase-associated protein 1                                                    | 0.00318 | 1.31  | Normal up vs Off IS Tolerant   |
| 1566540_PM_at  | ---                             | ---                                                                                    | 0.00319 | -1.24 | Normal down vs Off IS Tolerant |
| 239134_PM_at   | ---                             | ---                                                                                    | 0.00319 | 1.38  | Normal up vs Off IS Tolerant   |
| 227628_PM_at   | GPX8                            | glutathione peroxidase 8 (putative)                                                    | 0.00319 | -1.59 | Normal down vs Off IS Tolerant |
| 201905_PM_s_at | CTDSPL                          | CTD (carboxy-terminal domain, RNA polymerase II, polypeptide A) small phosphatase-like | 0.00319 | 1.30  | Normal up vs Off IS Tolerant   |
| 201106_PM_at   | GPX4                            | glutathione peroxidase 4 (phospholipid hydroperoxidase)                                | 0.00319 | 1.31  | Normal up vs Off IS Tolerant   |
| 229747_PM_x_at | LOC146880                       | Hypothetical LOC146880                                                                 | 0.00319 | -1.29 | Normal down vs Off IS Tolerant |
| 230955_PM_s_at | C20orf112                       | chromosome 20 open reading frame 112                                                   | 0.00319 | 1.25  | Normal up vs Off IS Tolerant   |

|                |           |                                                                       |         |       |                                |
|----------------|-----------|-----------------------------------------------------------------------|---------|-------|--------------------------------|
| 201975_PM_at   | CLIP1     | CAP-GLY domain containing linker protein 1                            | 0.00319 | 1.43  | Normal up vs Off IS Tolerant   |
| 205594_PM_at   | ZNF652    | zinc finger protein 652                                               | 0.00320 | 1.60  | Normal up vs Off IS Tolerant   |
| 236831_PM_at   | CCDC50    | coiled-coil domain containing 50                                      | 0.00320 | -1.57 | Normal down vs Off IS Tolerant |
| 235012_PM_at   | LRCH1     | leucine-rich repeats and calponin homology (CH) domain containing 1   | 0.00320 | 1.43  | Normal up vs Off IS Tolerant   |
| 218649_PM_x_at | SDCCAG1   | serologically defined colon cancer antigen 1                          | 0.00320 | 1.27  | Normal up vs Off IS Tolerant   |
| 218809_PM_at   | PANK2     | pantothenate kinase 2                                                 | 0.00320 | -1.30 | Normal down vs Off IS Tolerant |
| 244268_PM_x_at | LOC646214 | p21 protein (Cdc42/Rac)-activated kinase 2 pseudogene                 | 0.00320 | -1.20 | Normal down vs Off IS Tolerant |
| 1552686_PM_at  | C20orf152 | chromosome 20 open reading frame 152                                  | 0.00321 | -1.32 | Normal down vs Off IS Tolerant |
| 226588_PM_at   | CWC22     | CWC22 spliceosome-associated protein homolog ( <i>S. cerevisiae</i> ) | 0.00321 | 1.43  | Normal up vs Off IS Tolerant   |
| 1554963_PM_at  | ---       | ---                                                                   | 0.00321 | 1.31  | Normal up vs Off IS Tolerant   |
| 219866_PM_at   | CLIC5     | chloride intracellular channel 5                                      | 0.00321 | -1.29 | Normal down vs Off IS Tolerant |
| 228932_PM_at   | ---       | ---                                                                   | 0.00321 | 1.53  | Normal up vs Off IS Tolerant   |
| 238778_PM_at   | MPP7      | membrane protein, palmitoylated 7 (MAGUK p55 subfamily member 7)      | 0.00321 | 1.60  | Normal up vs Off IS Tolerant   |
| 244407_PM_at   | CYP39A1   | cytochrome P450, family 39, subfamily A, polypeptide 1                | 0.00321 | -1.45 | Normal down vs Off IS Tolerant |
| 1558496_PM_at  | ---       | ---                                                                   | 0.00322 | -1.70 | Normal down vs Off IS Tolerant |
| 1562656_PM_at  | ---       | ---                                                                   | 0.00322 | -1.53 | Normal down vs Off IS Tolerant |
| 242343_PM_x_at | ---       | ---                                                                   | 0.00322 | -1.48 | Normal down vs Off IS Tolerant |
| 1570207_PM_at  | FRRS1     | ferric-chelate reductase 1                                            | 0.00322 | -1.28 | Normal down vs Off IS Tolerant |
| 211339_PM_s_at | ITK       | IL2-inducible T-cell kinase                                           | 0.00322 | 1.89  | Normal up vs Off IS Tolerant   |

|                 |                        |                                                                                          |         |       |                                |
|-----------------|------------------------|------------------------------------------------------------------------------------------|---------|-------|--------------------------------|
| 227494_PM_at    | LOC253842 ///<br>NR6A1 | hypothetical protein LOC253842 ///<br>nuclear receptor subfamily 6, group A,<br>member 1 | 0.00323 | -1.37 | Normal down vs Off IS Tolerant |
| 221910_PM_at    | ETV1                   | ets variant 1                                                                            | 0.00323 | -1.22 | Normal down vs Off IS Tolerant |
| 1557697_PM_at   | ---                    | ---                                                                                      | 0.00323 | -1.34 | Normal down vs Off IS Tolerant |
| 205751_PM_at    | SH3GL2                 | SH3-domain GRB2-like 2                                                                   | 0.00323 | -1.23 | Normal down vs Off IS Tolerant |
| 235908_PM_at    | MMP11                  | matrix metalloproteinase 11 (stromelysin<br>3)                                           | 0.00323 | -1.29 | Normal down vs Off IS Tolerant |
| 233676_PM_at    | ---                    | ---                                                                                      | 0.00324 | -1.29 | Normal down vs Off IS Tolerant |
| 212920_PM_at    | REST                   | RE1-silencing transcription factor                                                       | 0.00324 | 1.43  | Normal up vs Off IS Tolerant   |
| 1559957_PM_a_at | LOC642852              | hypothetical LOC642852                                                                   | 0.00324 | 1.44  | Normal up vs Off IS Tolerant   |
| 219135_PM_s_at  | LMF1                   | lipase maturation factor 1                                                               | 0.00324 | 1.42  | Normal up vs Off IS Tolerant   |
| 239915_PM_at    | LOC100133311           | hypothetical LOC100133311                                                                | 0.00324 | -1.22 | Normal down vs Off IS Tolerant |
| 227355_PM_at    | RBM26                  | RNA binding motif protein 26                                                             | 0.00325 | -1.30 | Normal down vs Off IS Tolerant |
| 232113_PM_at    | ---                    | ---                                                                                      | 0.00325 | -1.35 | Normal down vs Off IS Tolerant |
| 205482_PM_x_at  | SNX15                  | sorting nexin 15                                                                         | 0.00325 | -1.49 | Normal down vs Off IS Tolerant |
| 234210_PM_x_at  | ACTR2                  | ARP2 actin-related protein 2 homolog<br>(yeast)                                          | 0.00325 | 1.93  | Normal up vs Off IS Tolerant   |
| 239855_PM_at    | PPM1L                  | Protein phosphatase, Mg <sup>2+</sup> /Mn <sup>2+</sup><br>dependent, 1L                 | 0.00325 | -1.22 | Normal down vs Off IS Tolerant |
| 204434_PM_at    | SPATA2                 | spermatogenesis associated 2                                                             | 0.00325 | 1.46  | Normal up vs Off IS Tolerant   |
| 209124_PM_at    | MYD88                  | myeloid differentiation primary response<br>gene (88)                                    | 0.00325 | -1.24 | Normal down vs Off IS Tolerant |
| 1562289_PM_at   | ---                    | ---                                                                                      | 0.00325 | -1.97 | Normal down vs Off IS Tolerant |
| 238121_PM_at    | GK5                    | glycerol kinase 5 (putative)                                                             | 0.00326 | 1.69  | Normal up vs Off IS Tolerant   |

|                |          |                                                                                                |         |       |                                |
|----------------|----------|------------------------------------------------------------------------------------------------|---------|-------|--------------------------------|
| 1553564_PM_at  | MACROD2  | MACRO domain containing 2                                                                      | 0.00326 | -1.67 | Normal down vs Off IS Tolerant |
| 224696_PM_s_at | DCAF5    | DDB1 and CUL4 associated factor 5                                                              | 0.00326 | 1.39  | Normal up vs Off IS Tolerant   |
| 201908_PM_at   | DVL3     | dishevelled, dsh homolog 3 (Drosophila)                                                        | 0.00327 | 1.41  | Normal up vs Off IS Tolerant   |
| 219253_PM_at   | TMEM185B | transmembrane protein 185B<br>(pseudogene)                                                     | 0.00327 | 1.86  | Normal up vs Off IS Tolerant   |
| 229737_PM_at   | FAM46A   | Family with sequence similarity 46,<br>member A                                                | 0.00327 | -1.35 | Normal down vs Off IS Tolerant |
| 230270_PM_at   | PRPF38B  | PRP38 pre-mRNA processing factor 38<br>(yeast) domain containing B                             | 0.00327 | 1.33  | Normal up vs Off IS Tolerant   |
| 228563_PM_at   | GJC1     | gap junction protein, gamma 1, 45kDa                                                           | 0.00328 | -1.33 | Normal down vs Off IS Tolerant |
| 232611_PM_at   | GOLGA2B  | golgin A2 family, member B                                                                     | 0.00328 | 1.30  | Normal up vs Off IS Tolerant   |
| 219482_PM_at   | SETD4    | SET domain containing 4                                                                        | 0.00328 | 1.55  | Normal up vs Off IS Tolerant   |
| 204229_PM_at   | SLC17A7  | solute carrier family 17 (sodium-<br>dependent inorganic phosphate<br>cotransporter), member 7 | 0.00328 | -1.28 | Normal down vs Off IS Tolerant |
| 205339_PM_at   | STIL     | SCL/TAL1 interrupting locus                                                                    | 0.00328 | 1.19  | Normal up vs Off IS Tolerant   |
| 241817_PM_at   | C3orf62  | chromosome 3 open reading frame 62                                                             | 0.00328 | 1.52  | Normal up vs Off IS Tolerant   |
| 212031_PM_at   | RBM25    | RNA binding motif protein 25                                                                   | 0.00329 | 1.28  | Normal up vs Off IS Tolerant   |
| 224124_PM_at   | ZRANB3   | zinc finger, RAN-binding domain<br>containing 3                                                | 0.00329 | -1.39 | Normal down vs Off IS Tolerant |
| 229299_PM_at   | C5orf33  | chromosome 5 open reading frame 33                                                             | 0.00329 | 1.32  | Normal up vs Off IS Tolerant   |
| 1562495_PM_at  | ANKFY1   | Ankyrin repeat and FYVE domain<br>containing 1                                                 | 0.00329 | -1.26 | Normal down vs Off IS Tolerant |
| 232226_PM_at   | LRRC4C   | leucine rich repeat containing 4C                                                              | 0.00329 | -1.52 | Normal down vs Off IS Tolerant |
| 212936_PM_at   | FAM172A  | family with sequence similarity 172,<br>member A                                               | 0.00329 | 1.28  | Normal up vs Off IS Tolerant   |
| 209063_PM_x_at | PAIP1    | poly(A) binding protein interacting<br>protein 1                                               | 0.00329 | 1.71  | Normal up vs Off IS Tolerant   |
| 1559006_PM_at  | ---      | ---                                                                                            | 0.00329 | 1.28  | Normal up vs Off IS Tolerant   |

|                                 |                           |                                                                              |         |       |                                |
|---------------------------------|---------------------------|------------------------------------------------------------------------------|---------|-------|--------------------------------|
| AFFX-HUMISGF3A/M979<br>35_MA_at | STAT1                     | signal transducer and activator of transcription 1, 91kDa                    | 0.00330 | -1.53 | Normal down vs Off IS Tolerant |
| 203249_PM_at                    | EZH1                      | enhancer of zeste homolog 1 (Drosophila)                                     | 0.00330 | 1.35  | Normal up vs Off IS Tolerant   |
| 217260_PM_x_at                  | IGHG1 ///<br>LOC100293559 | Immunoglobulin heavy constant gamma 1 (G1m marker) /// Similar to hCG1812074 | 0.00330 | -1.24 | Normal down vs Off IS Tolerant |
| 207417_PM_s_at                  | ZNF177                    | zinc finger protein 177                                                      | 0.00330 | 1.35  | Normal up vs Off IS Tolerant   |
| 234486_PM_at                    | OR51B2                    | olfactory receptor, family 51, subfamily B, member 2                         | 0.00330 | -1.51 | Normal down vs Off IS Tolerant |
| 216326_PM_s_at                  | HDAC3                     | histone deacetylase 3                                                        | 0.00330 | 1.30  | Normal up vs Off IS Tolerant   |
| 1570639_PM_at                   | ---                       | ---                                                                          | 0.00331 | -1.64 | Normal down vs Off IS Tolerant |
| 204112_PM_s_at                  | HNMT                      | histamine N-methyltransferase                                                | 0.00331 | -1.74 | Normal down vs Off IS Tolerant |
| 222152_PM_at                    | PDCD6                     | Programmed cell death 6                                                      | 0.00331 | 1.39  | Normal up vs Off IS Tolerant   |
| 236968_PM_at                    | C12orf12                  | chromosome 12 open reading frame 12                                          | 0.00331 | -1.21 | Normal down vs Off IS Tolerant |
| 233467_PM_s_at                  | TSPAN32                   | tetraspanin 32                                                               | 0.00331 | 1.41  | Normal up vs Off IS Tolerant   |
| 32062_PM_at                     | LRRC14                    | leucine rich repeat containing 14                                            | 0.00332 | 1.22  | Normal up vs Off IS Tolerant   |
| 237972_PM_at                    | ---                       | ---                                                                          | 0.00332 | -1.33 | Normal down vs Off IS Tolerant |
| 211928_PM_at                    | DYNC1H1                   | dynein, cytoplasmic 1, heavy chain 1                                         | 0.00332 | 1.20  | Normal up vs Off IS Tolerant   |
| 201100_PM_s_at                  | USP9X                     | ubiquitin specific peptidase 9, X-linked                                     | 0.00332 | 1.18  | Normal up vs Off IS Tolerant   |
| 212231_PM_at                    | FBXO21                    | F-box protein 21                                                             | 0.00332 | 1.41  | Normal up vs Off IS Tolerant   |
| 202813_PM_at                    | TARBP1                    | TAR (HIV-1) RNA binding protein 1                                            | 0.00333 | 1.38  | Normal up vs Off IS Tolerant   |
| 203792_PM_x_at                  | PCGF2                     | polycomb group ring finger 2                                                 | 0.00333 | -1.35 | Normal down vs Off IS Tolerant |
| 216348_PM_at                    | RPS17                     | ribosomal protein S17                                                        | 0.00333 | 1.36  | Normal up vs Off IS Tolerant   |
| 213634_PM_s_at                  | TRMU                      | tRNA 5-methylaminomethyl-2-thiouridylate methyltransferase                   | 0.00334 | 1.36  | Normal up vs Off IS Tolerant   |
| 234763_PM_at                    | ---                       | ---                                                                          | 0.00334 | -1.22 | Normal down vs Off IS Tolerant |
| 219136_PM_s_at                  | LMF1                      | lipase maturation factor 1                                                   | 0.00335 | 1.30  | Normal up vs Off IS Tolerant   |

|                 |                  |                                                                                         |         |       |                                |
|-----------------|------------------|-----------------------------------------------------------------------------------------|---------|-------|--------------------------------|
| 1569876_PM_at   | C17orf57         | chromosome 17 open reading frame 57                                                     | 0.00335 | -1.29 | Normal down vs Off IS Tolerant |
| 214662_PM_at    | WDR43            | WD repeat domain 43                                                                     | 0.00335 | 1.52  | Normal up vs Off IS Tolerant   |
| 233632_PM_s_at  | XRN1             | 5'-3' exoribonuclease 1                                                                 | 0.00335 | 1.22  | Normal up vs Off IS Tolerant   |
| 244765_PM_at    | ---              | ---                                                                                     | 0.00336 | 1.24  | Normal up vs Off IS Tolerant   |
| 206272_PM_at    | RAB4A /// SPHAR  | RAB4A, member RAS oncogene family /// S-phase response (cyclin related)                 | 0.00336 | 1.50  | Normal up vs Off IS Tolerant   |
| 202071_PM_at    | SDC4             | syndecan 4                                                                              | 0.00336 | 1.80  | Normal up vs Off IS Tolerant   |
| 215608_PM_at    | ---              | ---                                                                                     | 0.00336 | -1.34 | Normal down vs Off IS Tolerant |
| 225995_PM_x_at  | WASH1 /// WASH2P | WAS protein family homolog 1 /// WAS protein family homolog 2 pseudogene                | 0.00336 | 1.28  | Normal up vs Off IS Tolerant   |
| 224935_PM_at    | EIF2S3           | eukaryotic translation initiation factor 2, subunit 3 gamma, 52kDa                      | 0.00337 | 1.23  | Normal up vs Off IS Tolerant   |
| 223360_PM_at    | C21orf56         | chromosome 21 open reading frame 56                                                     | 0.00337 | 1.50  | Normal up vs Off IS Tolerant   |
| 210571_PM_s_at  | CMAH             | cytidine monophosphate-N-acetylneuraminic acid hydroxylase (CMP-N-acetylneuraminate mon | 0.00337 | 1.50  | Normal up vs Off IS Tolerant   |
| 209641_PM_s_at  | ABCC3            | ATP-binding cassette, sub-family C (CFTR/MRP), member 3                                 | 0.00337 | 1.88  | Normal up vs Off IS Tolerant   |
| 1554178_PM_a_at | FAM126B          | family with sequence similarity 126, member B                                           | 0.00337 | 1.39  | Normal up vs Off IS Tolerant   |
| 222329_PM_x_at  | ---              | ---                                                                                     | 0.00337 | -1.93 | Normal down vs Off IS Tolerant |
| 241702_PM_at    | ---              | ---                                                                                     | 0.00338 | 1.93  | Normal up vs Off IS Tolerant   |
| 1558199_PM_at   | FN1              | fibronectin 1                                                                           | 0.00338 | -1.29 | Normal down vs Off IS Tolerant |
| 238422_PM_at    | LOC151534        | hypothetical LOC151534                                                                  | 0.00338 | -1.26 | Normal down vs Off IS Tolerant |
| 1553459_PM_at   | CCDC150          | coiled-coil domain containing 150                                                       | 0.00338 | -1.36 | Normal down vs Off IS Tolerant |
| 1567079_PM_at   | CLN6             | ceroid-lipofuscinosis, neuronal 6, late infantile, variant                              | 0.00338 | -1.22 | Normal down vs Off IS Tolerant |

|                 |          |                                                                            |         |       |                                |
|-----------------|----------|----------------------------------------------------------------------------|---------|-------|--------------------------------|
| 223431_PM_at    | CNO      | cappuccino homolog (mouse)                                                 | 0.00338 | 1.54  | Normal up vs Off IS Tolerant   |
| 1554466_PM_a_at | C16orf13 | chromosome 16 open reading frame 13                                        | 0.00338 | 1.58  | Normal up vs Off IS Tolerant   |
| 207015_PM_s_at  | ALDH1A2  | aldehyde dehydrogenase 1 family, member A2                                 | 0.00339 | -1.25 | Normal down vs Off IS Tolerant |
| 222459_PM_at    | AKIRIN1  | akirin 1                                                                   | 0.00339 | 1.35  | Normal up vs Off IS Tolerant   |
| 241731_PM_x_at  | ZNF440   | zinc finger protein 440                                                    | 0.00339 | 1.34  | Normal up vs Off IS Tolerant   |
| 225971_PM_at    | DDHD1    | DDHD domain containing 1                                                   | 0.00339 | 1.40  | Normal up vs Off IS Tolerant   |
| 213877_PM_x_at  | TCEB2    | transcription elongation factor B (SIII), polypeptide 2 (18kDa, elongin B) | 0.00340 | -1.37 | Normal down vs Off IS Tolerant |
| 230528_PM_s_at  | MGC2752  | hypothetical LOC65996                                                      | 0.00340 | 1.55  | Normal up vs Off IS Tolerant   |
| 1557064_PM_s_at | HGSNAT   | heparan-alpha-glucosaminide N-acetyltransferase                            | 0.00340 | 1.53  | Normal up vs Off IS Tolerant   |
| 239671_PM_at    | ---      | ---                                                                        | 0.00340 | -1.21 | Normal down vs Off IS Tolerant |
| 205940_PM_at    | MYH3     | myosin, heavy chain 3, skeletal muscle, embryonic                          | 0.00340 | 1.31  | Normal up vs Off IS Tolerant   |
| 205343_PM_at    | SULT1C2  | sulfotransferase family, cytosolic, 1C, member 2                           | 0.00341 | -1.21 | Normal down vs Off IS Tolerant |
| 1558830_PM_at   | ---      | ---                                                                        | 0.00341 | 1.19  | Normal up vs Off IS Tolerant   |
| 224701_PM_at    | PARP14   | poly (ADP-ribose) polymerase family, member 14                             | 0.00341 | -1.44 | Normal down vs Off IS Tolerant |
| 233169_PM_at    | ZNF350   | zinc finger protein 350                                                    | 0.00341 | 1.57  | Normal up vs Off IS Tolerant   |
| 1569156_PM_at   | ZNF846   | zinc finger protein 846                                                    | 0.00341 | 1.28  | Normal up vs Off IS Tolerant   |
| 228782_PM_at    | SCGB3A2  | secretoglobin, family 3A, member 2                                         | 0.00341 | -1.19 | Normal down vs Off IS Tolerant |
| 222450_PM_at    | PMEPA1   | prostate transmembrane protein, androgen induced 1                         | 0.00341 | -1.67 | Normal down vs Off IS Tolerant |
| 204449_PM_at    | PDCL     | phosducin-like                                                             | 0.00342 | 1.28  | Normal up vs Off IS Tolerant   |
| 242045_PM_at    | ANKRD18A | Ankyrin repeat domain 18A                                                  | 0.00342 | -1.59 | Normal down vs Off IS Tolerant |
| 234892_PM_at    | ---      | ---                                                                        | 0.00342 | -1.38 | Normal down vs Off IS Tolerant |
| 229120_PM_s_at  | CDC42SE1 | CDC42 small effector 1                                                     | 0.00342 | 1.21  | Normal up vs Off IS Tolerant   |

|                 |                                 |                                                                                              |         |       |                                |
|-----------------|---------------------------------|----------------------------------------------------------------------------------------------|---------|-------|--------------------------------|
| 242076_PM_at    | ---                             | ---                                                                                          | 0.00342 | -1.41 | Normal down vs Off IS Tolerant |
| 204497_PM_at    | ADCY9                           | adenylate cyclase 9                                                                          | 0.00343 | 1.55  | Normal up vs Off IS Tolerant   |
| 241006_PM_at    | ---                             | ---                                                                                          | 0.00343 | -1.20 | Normal down vs Off IS Tolerant |
| 232569_PM_at    | ---                             | ---                                                                                          | 0.00343 | 1.69  | Normal up vs Off IS Tolerant   |
| 229375_PM_at    | PPIE                            | peptidylprolyl isomerase E (cyclophilin E)                                                   | 0.00343 | 1.28  | Normal up vs Off IS Tolerant   |
| 1561017_PM_at   | ---                             | ---                                                                                          | 0.00343 | -1.52 | Normal down vs Off IS Tolerant |
| 213448_PM_at    | ---                             | ---                                                                                          | 0.00344 | 1.44  | Normal up vs Off IS Tolerant   |
| 1569675_PM_at   | POU2AF1                         | POU class 2 associating factor 1                                                             | 0.00344 | -1.38 | Normal down vs Off IS Tolerant |
| 1552749_PM_a_at | KLC3                            | kinesin light chain 3                                                                        | 0.00344 | -1.43 | Normal down vs Off IS Tolerant |
| 201103_PM_x_at  | NBPF10 /// NBPF15<br>/// NBPF16 | neuroblastoma breakpoint family,<br>member 10 /// neuroblastoma<br>breakpoint family, member | 0.00344 | 1.16  | Normal up vs Off IS Tolerant   |
| 241140_PM_at    | LMO7                            | LIM domain 7                                                                                 | 0.00345 | -1.29 | Normal down vs Off IS Tolerant |
| 1555831_PM_s_at | LRRC41                          | leucine rich repeat containing 41                                                            | 0.00345 | 1.48  | Normal up vs Off IS Tolerant   |
| 244764_PM_at    | LOC100507198                    | hypothetical LOC100507198                                                                    | 0.00345 | 1.37  | Normal up vs Off IS Tolerant   |
| 219193_PM_at    | WDR70                           | WD repeat domain 70                                                                          | 0.00346 | -1.30 | Normal down vs Off IS Tolerant |
| 1554277_PM_s_at | FANCM                           | Fanconi anemia, complementation group<br>M                                                   | 0.00346 | -1.31 | Normal down vs Off IS Tolerant |
| 242838_PM_at    | MAP6D1                          | MAP6 domain containing 1                                                                     | 0.00347 | 1.51  | Normal up vs Off IS Tolerant   |
| 227593_PM_at    | FLJ37453                        | hypothetical LOC729614                                                                       | 0.00347 | 1.44  | Normal up vs Off IS Tolerant   |
| 1561963_PM_at   | MIR4296                         | microRNA 4296                                                                                | 0.00348 | -1.23 | Normal down vs Off IS Tolerant |
| 210781_PM_x_at  | GRIN1                           | glutamate receptor, ionotropic, N-methyl<br>D-aspartate 1                                    | 0.00348 | -1.25 | Normal down vs Off IS Tolerant |
| 220458_PM_at    | ---                             | ---                                                                                          | 0.00348 | 1.84  | Normal up vs Off IS Tolerant   |



|                 |              |                                                                                         |         |       |                                |
|-----------------|--------------|-----------------------------------------------------------------------------------------|---------|-------|--------------------------------|
| 201321_PM_s_at  | SMARCC2      | SWI/SNF related, matrix associated, actin dependent regulator of chromatin, subfamily c | 0.00348 | 1.37  | Normal up vs Off IS Tolerant   |
| 235158_PM_at    | TMEM209      | transmembrane protein 209                                                               | 0.00349 | 1.59  | Normal up vs Off IS Tolerant   |
| 236338_PM_at    | ---          | ---                                                                                     | 0.00349 | 1.69  | Normal up vs Off IS Tolerant   |
| 231386_PM_at    | C2orf84      | chromosome 2 open reading frame 84                                                      | 0.00350 | -1.34 | Normal down vs Off IS Tolerant |
| 235217_PM_at    | LOC100216546 | hypothetical LOC100216546                                                               | 0.00350 | -1.24 | Normal down vs Off IS Tolerant |
| 201221_PM_s_at  | SNRNP70      | small nuclear ribonucleoprotein 70kDa (U1)                                              | 0.00350 | 1.32  | Normal up vs Off IS Tolerant   |
| 228958_PM_at    | ZNF19        | zinc finger protein 19                                                                  | 0.00350 | -1.32 | Normal down vs Off IS Tolerant |
| 1552736_PM_a_at | NETO1        | neuropilin (NRP) and tolloid (TLL)-like 1                                               | 0.00350 | -1.88 | Normal down vs Off IS Tolerant |
| 205025_PM_at    | ZBTB48       | zinc finger and BTB domain containing 48                                                | 0.00350 | 1.52  | Normal up vs Off IS Tolerant   |
| 219810_PM_at    | VCPIP1       | valosin containing protein (p97)/p47 complex interacting protein 1                      | 0.00351 | 1.63  | Normal up vs Off IS Tolerant   |
| 214978_PM_s_at  | PPFIA4       | protein tyrosine phosphatase, receptor type, f polypeptide (PTPRF), interacting protein | 0.00351 | -1.24 | Normal down vs Off IS Tolerant |
| 222393_PM_s_at  | NAA50        | N(alpha)-acetyltransferase 50, NatE catalytic subunit                                   | 0.00351 | 1.59  | Normal up vs Off IS Tolerant   |
| 1552269_PM_at   | SPATA17      | spermatogenesis associated 17                                                           | 0.00352 | -1.39 | Normal down vs Off IS Tolerant |
| 1557996_PM_at   | LOC100132832 | postmeiotic segregation increased 2-like 5-like                                         | 0.00352 | 1.61  | Normal up vs Off IS Tolerant   |
| 214959_PM_s_at  | API5         | apoptosis inhibitor 5                                                                   | 0.00352 | 1.99  | Normal up vs Off IS Tolerant   |
| 243278_PM_at    | FOXP2        | forkhead box P2                                                                         | 0.00353 | -1.35 | Normal down vs Off IS Tolerant |
| 1563657_PM_at   | PLXND1       | plexin D1                                                                               | 0.00353 | -1.27 | Normal down vs Off IS Tolerant |
| 237986_PM_at    | ---          | ---                                                                                     | 0.00353 | -1.28 | Normal down vs Off IS Tolerant |

|                |              |                                                               |         |       |                                |
|----------------|--------------|---------------------------------------------------------------|---------|-------|--------------------------------|
| 202731_PM_at   | PDCD4        | programmed cell death 4 (neoplastic transformation inhibitor) | 0.00354 | 1.49  | Normal up vs Off IS Tolerant   |
| 242736_PM_at   | ---          | ---                                                           | 0.00354 | 1.18  | Normal up vs Off IS Tolerant   |
| 202389_PM_s_at | HTT          | huntingtin                                                    | 0.00355 | 1.29  | Normal up vs Off IS Tolerant   |
| 220704_PM_at   | IKZF1        | IKAROS family zinc finger 1 (Ikaros)                          | 0.00355 | 1.84  | Normal up vs Off IS Tolerant   |
| 1562512_PM_at  | SMPDL3A      | Sphingomyelin phosphodiesterase, acid-like 3A                 | 0.00355 | -1.40 | Normal down vs Off IS Tolerant |
| 229124_PM_at   | PROK1        | prokineticin 1                                                | 0.00356 | -1.17 | Normal down vs Off IS Tolerant |
| 241287_PM_x_at | ---          | ---                                                           | 0.00356 | 1.20  | Normal up vs Off IS Tolerant   |
| 243371_PM_at   | ---          | ---                                                           | 0.00356 | 1.75  | Normal up vs Off IS Tolerant   |
| 1561262_PM_at  | ---          | ---                                                           | 0.00356 | -1.49 | Normal down vs Off IS Tolerant |
| 205818_PM_at   | DBC1         | deleted in bladder cancer 1                                   | 0.00357 | -2.30 | Normal down vs Off IS Tolerant |
| 240012_PM_at   | ---          | ---                                                           | 0.00357 | -1.28 | Normal down vs Off IS Tolerant |
| 213034_PM_at   | SIK3         | SIK family kinase 3                                           | 0.00358 | 1.23  | Normal up vs Off IS Tolerant   |
| 1562453_PM_at  | ---          | ---                                                           | 0.00358 | -1.28 | Normal down vs Off IS Tolerant |
| 237345_PM_at   | LOC100509639 | hypothetical LOC100509639                                     | 0.00358 | -1.40 | Normal down vs Off IS Tolerant |
| 1563398_PM_at  | ---          | ---                                                           | 0.00358 | -1.26 | Normal down vs Off IS Tolerant |
| 40612_PM_at    | DOPEY1       | dopey family member 1                                         | 0.00358 | 1.29  | Normal up vs Off IS Tolerant   |
| 1555343_PM_at  | MEGF10       | multiple EGF-like-domains 10                                  | 0.00358 | -1.37 | Normal down vs Off IS Tolerant |
| 205356_PM_at   | USP13        | ubiquitin specific peptidase 13 (isopeptidase T-3)            | 0.00358 | 1.38  | Normal up vs Off IS Tolerant   |
| 220331_PM_at   | CYP46A1      | cytochrome P450, family 46, subfamily A, polypeptide 1        | 0.00359 | -1.24 | Normal down vs Off IS Tolerant |
| 230753_PM_at   | PATL2        | protein associated with topoisomerase II homolog 2 (yeast)    | 0.00359 | 1.63  | Normal up vs Off IS Tolerant   |
| 242111_PM_at   | METTL3       | methyltransferase like 3                                      | 0.00359 | 1.56  | Normal up vs Off IS Tolerant   |

|                |                               |                                                                           |         |       |                                |
|----------------|-------------------------------|---------------------------------------------------------------------------|---------|-------|--------------------------------|
| 211794_PM_at   | FYB                           | FYN binding protein                                                       | 0.00360 | -1.42 | Normal down vs Off IS Tolerant |
| 1562678_PM_at  | ---                           | ---                                                                       | 0.00360 | -1.33 | Normal down vs Off IS Tolerant |
| 223080_PM_at   | GLS                           | Glutaminase                                                               | 0.00360 | 1.63  | Normal up vs Off IS Tolerant   |
| 221187_PM_s_at | FUZ                           | fuzzy homolog (Drosophila)                                                | 0.00360 | -1.30 | Normal down vs Off IS Tolerant |
| 218246_PM_at   | MUL1                          | mitochondrial E3 ubiquitin protein ligase 1                               | 0.00360 | 1.27  | Normal up vs Off IS Tolerant   |
| 240904_PM_at   | ---                           | ---                                                                       | 0.00360 | -1.67 | Normal down vs Off IS Tolerant |
| 224719_PM_s_at | C12orf57                      | chromosome 12 open reading frame 57                                       | 0.00361 | 1.66  | Normal up vs Off IS Tolerant   |
| 223634_PM_at   | RASD2                         | RASD family, member 2                                                     | 0.00361 | -1.23 | Normal down vs Off IS Tolerant |
| 229231_PM_at   | LRRC37B                       | leucine rich repeat containing 37B                                        | 0.00361 | 1.33  | Normal up vs Off IS Tolerant   |
| 215095_PM_at   | ---                           | ---                                                                       | 0.00362 | 1.30  | Normal up vs Off IS Tolerant   |
| 213035_PM_at   | ANKRD28                       | ankyrin repeat domain 28                                                  | 0.00363 | 1.53  | Normal up vs Off IS Tolerant   |
| 234834_PM_at   | ---                           | ---                                                                       | 0.00363 | -1.69 | Normal down vs Off IS Tolerant |
| 208773_PM_s_at | ANKHD1 ///<br>ANKHD1-EIF4EBP3 | ankyrin repeat and KH domain containing 1 /// ANKHD1-EIF4EBP3 readthrough | 0.00364 | 1.19  | Normal up vs Off IS Tolerant   |
| 1563839_PM_at  | TBC1D7                        | TBC1 domain family, member 7                                              | 0.00364 | -1.27 | Normal down vs Off IS Tolerant |
| 231907_PM_at   | ABL2                          | v-abl Abelson murine leukemia viral oncogene homolog 2                    | 0.00364 | 1.48  | Normal up vs Off IS Tolerant   |
| 208321_PM_s_at | CABP1                         | calcium binding protein 1                                                 | 0.00364 | -1.19 | Normal down vs Off IS Tolerant |
| 231853_PM_at   | TUBD1                         | tubulin, delta 1                                                          | 0.00365 | 1.68  | Normal up vs Off IS Tolerant   |
| 234724_PM_x_at | PCDHB18                       | protocadherin beta 18 pseudogene                                          | 0.00365 | -1.29 | Normal down vs Off IS Tolerant |
| 244690_PM_at   | ---                           | ---                                                                       | 0.00365 | -2.03 | Normal down vs Off IS Tolerant |

|                |                                  |                                                              |         |       |                                |
|----------------|----------------------------------|--------------------------------------------------------------|---------|-------|--------------------------------|
| 237041_PM_x_at | RCOR1                            | REST corepressor 1                                           | 0.00365 | -1.32 | Normal down vs Off IS Tolerant |
| 215278_PM_at   | ---                              | ---                                                          | 0.00365 | -1.48 | Normal down vs Off IS Tolerant |
| 228011_PM_at   | FAM92A1                          | family with sequence similarity 92, member A1                | 0.00365 | -1.21 | Normal down vs Off IS Tolerant |
| 235705_PM_at   | ---                              | ---                                                          | 0.00366 | -1.43 | Normal down vs Off IS Tolerant |
| 213274_PM_s_at | CTSB                             | cathepsin B                                                  | 0.00366 | -1.59 | Normal down vs Off IS Tolerant |
| 205423_PM_at   | AP1B1                            | adaptor-related protein complex 1, beta 1 subunit            | 0.00366 | -1.25 | Normal down vs Off IS Tolerant |
| 238860_PM_at   | C6orf130                         | chromosome 6 open reading frame 130                          | 0.00366 | 1.42  | Normal up vs Off IS Tolerant   |
| 235721_PM_at   | DTX3                             | deltex homolog 3 (Drosophila)                                | 0.00367 | 1.35  | Normal up vs Off IS Tolerant   |
| 228662_PM_at   | LOC100505522 ///<br>LOC100508400 | hypothetical LOC100505522 ///<br>hypothetical LOC100508400   | 0.00367 | 1.49  | Normal up vs Off IS Tolerant   |
| 209057_PM_x_at | CDC5L                            | CDC5 cell division cycle 5-like (S. pombe)                   | 0.00368 | -2.78 | Normal down vs Off IS Tolerant |
| 240116_PM_at   | ---                              | ---                                                          | 0.00368 | -1.36 | Normal down vs Off IS Tolerant |
| 223258_PM_s_at | G2E3                             | G2/M-phase specific E3 ubiquitin protein ligase              | 0.00368 | 1.69  | Normal up vs Off IS Tolerant   |
| 222564_PM_at   | POGK                             | pogo transposable element with KRAB domain                   | 0.00368 | 1.48  | Normal up vs Off IS Tolerant   |
| 206607_PM_at   | CBL                              | Cas-Br-M (murine) ecotropic retroviral transforming sequence | 0.00369 | -1.27 | Normal down vs Off IS Tolerant |
| 228579_PM_at   | ---                              | ---                                                          | 0.00370 | -1.56 | Normal down vs Off IS Tolerant |
| 239673_PM_at   | ---                              | ---                                                          | 0.00370 | 1.98  | Normal up vs Off IS Tolerant   |
| 206755_PM_at   | CYP2B6                           | cytochrome P450, family 2, subfamily B, polypeptide 6        | 0.00370 | -1.24 | Normal down vs Off IS Tolerant |
| 1556844_PM_at  | LOC100132078                     | hypothetical protein LOC100132078                            | 0.00370 | -1.20 | Normal down vs Off IS Tolerant |

|                 |           |                                                                                         |         |       |                                |
|-----------------|-----------|-----------------------------------------------------------------------------------------|---------|-------|--------------------------------|
| 228666_PM_at    | C15orf38  | chromosome 15 open reading frame 38                                                     | 0.00370 | -1.27 | Normal down vs Off IS Tolerant |
| 222183_PM_x_at  | SNW1      | SNW domain containing 1                                                                 | 0.00371 | -1.49 | Normal down vs Off IS Tolerant |
| 211988_PM_at    | SMARCE1   | SWI/SNF related, matrix associated, actin dependent regulator of chromatin, subfamily e | 0.00371 | 1.28  | Normal up vs Off IS Tolerant   |
| 244780_PM_at    | SGPP2     | sphingosine-1-phosphate phosphatase 2                                                   | 0.00371 | -1.91 | Normal down vs Off IS Tolerant |
| 207798_PM_s_at  | ATXN2L    | ataxin 2-like                                                                           | 0.00371 | 1.55  | Normal up vs Off IS Tolerant   |
| 240792_PM_at    | ---       | ---                                                                                     | 0.00371 | -1.24 | Normal down vs Off IS Tolerant |
| 226657_PM_at    | C17orf103 | chromosome 17 open reading frame 103                                                    | 0.00371 | 1.50  | Normal up vs Off IS Tolerant   |
| 208808_PM_s_at  | HMGB2     | high-mobility group box 2                                                               | 0.00372 | 1.19  | Normal up vs Off IS Tolerant   |
| 243627_PM_at    | ---       | ---                                                                                     | 0.00372 | -1.24 | Normal down vs Off IS Tolerant |
| 240960_PM_at    | ---       | ---                                                                                     | 0.00372 | 1.49  | Normal up vs Off IS Tolerant   |
| 240464_PM_at    | ---       | ---                                                                                     | 0.00372 | -1.38 | Normal down vs Off IS Tolerant |
| 229046_PM_s_at  | PLEKHB1   | Pleckstrin homology domain containing, family B (evectins) member 1                     | 0.00372 | -1.27 | Normal down vs Off IS Tolerant |
| 212817_PM_at    | DNAJB5    | DnaJ (Hsp40) homolog, subfamily B, member 5                                             | 0.00373 | -1.39 | Normal down vs Off IS Tolerant |
| 227788_PM_at    | USP13     | ubiquitin specific peptidase 13 (isopeptidase T-3)                                      | 0.00373 | 1.35  | Normal up vs Off IS Tolerant   |
| 223626_PM_x_at  | IFI27L2   | interferon, alpha-inducible protein 27-like 2                                           | 0.00373 | -1.44 | Normal down vs Off IS Tolerant |
| 209289_PM_at    | NFIB      | nuclear factor I/B                                                                      | 0.00373 | 1.29  | Normal up vs Off IS Tolerant   |
| 1553961_PM_s_at | SNX21     | sorting nexin family member 21                                                          | 0.00374 | -1.31 | Normal down vs Off IS Tolerant |
| 214298_PM_x_at  | 6-Sep     | septin 6                                                                                | 0.00374 | 1.52  | Normal up vs Off IS Tolerant   |
| 236511_PM_at    | ---       | ---                                                                                     | 0.00374 | 1.80  | Normal up vs Off IS Tolerant   |

|                |                 |                                                                                |         |       |                                |
|----------------|-----------------|--------------------------------------------------------------------------------|---------|-------|--------------------------------|
| 212972_PM_x_at | APBB2           | amyloid beta (A4) precursor protein-binding, family B, member 2                | 0.00375 | -1.67 | Normal down vs Off IS Tolerant |
| 226619_PM_at   | SENP1           | SUMO1/sentrin specific peptidase 1                                             | 0.00375 | 1.28  | Normal up vs Off IS Tolerant   |
| 228304_PM_at   | RBM43           | RNA binding motif protein 43                                                   | 0.00375 | 1.61  | Normal up vs Off IS Tolerant   |
| 1565898_PM_at  | METT5D1         | Methyltransferase 5 domain containing 1                                        | 0.00375 | -2.32 | Normal down vs Off IS Tolerant |
| 211888_PM_x_at | CASP10          | caspase 10, apoptosis-related cysteine peptidase                               | 0.00375 | -1.28 | Normal down vs Off IS Tolerant |
| 228386_PM_s_at | DDX59           | DEAD (Asp-Glu-Ala-Asp) box polypeptide 59                                      | 0.00376 | 1.59  | Normal up vs Off IS Tolerant   |
| 202217_PM_at   | C21orf33        | chromosome 21 open reading frame 33                                            | 0.00376 | -1.30 | Normal down vs Off IS Tolerant |
| 225889_PM_at   | AEBP2           | AE binding protein 2                                                           | 0.00376 | 1.25  | Normal up vs Off IS Tolerant   |
| 213954_PM_at   | FAM169A         | family with sequence similarity 169, member A                                  | 0.00377 | 1.60  | Normal up vs Off IS Tolerant   |
| 212969_PM_x_at | EML3            | echinoderm microtubule associated protein like 3                               | 0.00378 | 1.26  | Normal up vs Off IS Tolerant   |
| 217988_PM_at   | CCNB1IP1        | cyclin B1 interacting protein 1                                                | 0.00378 | 1.37  | Normal up vs Off IS Tolerant   |
| 1553019_PM_at  | TMC2            | transmembrane channel-like 2                                                   | 0.00378 | -1.26 | Normal down vs Off IS Tolerant |
| 201522_PM_x_at | SNRPN /// SNURF | small nuclear ribonucleoprotein polypeptide N /// SNRPN upstream reading frame | 0.00378 | 1.39  | Normal up vs Off IS Tolerant   |
| 210314_PM_x_at | TNFSF13         | tumor necrosis factor (ligand) superfamily, member 13                          | 0.00379 | -1.44 | Normal down vs Off IS Tolerant |
| 218646_PM_at   | C4orf27         | chromosome 4 open reading frame 27                                             | 0.00379 | -1.57 | Normal down vs Off IS Tolerant |
| 37004_PM_at    | SFTPB           | surfactant protein B                                                           | 0.00379 | -1.23 | Normal down vs Off IS Tolerant |
| 209527_PM_at   | EXOSC2          | exosome component 2                                                            | 0.00380 | 1.40  | Normal up vs Off IS Tolerant   |
| 208607_PM_s_at | SAA1 /// SAA2   | serum amyloid A1 /// serum amyloid A2                                          | 0.00380 | -1.23 | Normal down vs Off IS Tolerant |
| 217917_PM_s_at | DYNLRB1         | dynein, light chain, roadblock-type 1                                          | 0.00380 | 1.32  | Normal up vs Off IS Tolerant   |
| 220587_PM_s_at | MLST8           | MTOR associated protein, LST8 homolog (S. cerevisiae)                          | 0.00380 | 1.41  | Normal up vs Off IS Tolerant   |

|                |                                       |                                                                                         |         |       |                                |
|----------------|---------------------------------------|-----------------------------------------------------------------------------------------|---------|-------|--------------------------------|
| 226247_PM_at   | PLEKHA1                               | pleckstrin homology domain containing, family A (phosphoinositide binding specific) mem | 0.00381 | 1.43  | Normal up vs Off IS Tolerant   |
| 1553574_PM_at  | IFNE                                  | interferon, epsilon                                                                     | 0.00381 | -1.50 | Normal down vs Off IS Tolerant |
| 217833_PM_at   | SYNCRIP                               | synaptotagmin binding, cytoplasmic RNA interacting protein                              | 0.00381 | 1.25  | Normal up vs Off IS Tolerant   |
| 1558654_PM_at  | PPM1H                                 | Protein phosphatase, Mg <sup>2+</sup> /Mn <sup>2+</sup> dependent, 1H                   | 0.00381 | -1.41 | Normal down vs Off IS Tolerant |
| 227563_PM_at   | FAM27E1 ///<br>FAM27E2 ///<br>FAM27E3 | family with sequence similarity 27, member E1 /// family with sequence similarity 27, m | 0.00381 | -1.21 | Normal down vs Off IS Tolerant |
| 220129_PM_at   | SOHLH2                                | spermatogenesis and oogenesis specific basic helix-loop-helix 2                         | 0.00382 | -1.49 | Normal down vs Off IS Tolerant |
| 205516_PM_x_at | CIZ1                                  | CDKN1A interacting zinc finger protein 1                                                | 0.00382 | 1.30  | Normal up vs Off IS Tolerant   |
| 230595_PM_at   | LOC572558                             | hypothetical locus LOC572558                                                            | 0.00382 | -1.35 | Normal down vs Off IS Tolerant |
| 209412_PM_at   | TRAPPC10                              | trafficking protein particle complex 10                                                 | 0.00382 | 1.37  | Normal up vs Off IS Tolerant   |
| 215186_PM_at   | TBC1D30                               | TBC1 domain family, member 30                                                           | 0.00382 | -1.41 | Normal down vs Off IS Tolerant |
| 229848_PM_at   | ZNF10                                 | zinc finger protein 10                                                                  | 0.00383 | 1.46  | Normal up vs Off IS Tolerant   |
| 234004_PM_at   | TTC28                                 | tetratricopeptide repeat domain 28                                                      | 0.00383 | -1.22 | Normal down vs Off IS Tolerant |
| 230846_PM_at   | AKAP5                                 | A kinase (PRKA) anchor protein 5                                                        | 0.00383 | 1.37  | Normal up vs Off IS Tolerant   |
| 226742_PM_at   | SAR1B                                 | SAR1 homolog B ( <i>S. cerevisiae</i> )                                                 | 0.00383 | 1.27  | Normal up vs Off IS Tolerant   |
| 235176_PM_at   | ZFP82                                 | zinc finger protein 82 homolog (mouse)                                                  | 0.00383 | 1.28  | Normal up vs Off IS Tolerant   |
| 206316_PM_s_at | KNTC1                                 | kinetochore associated 1                                                                | 0.00383 | 1.49  | Normal up vs Off IS Tolerant   |
| 202904_PM_s_at | LSM5                                  | LSM5 homolog, U6 small nuclear RNA associated ( <i>S. cerevisiae</i> )                  | 0.00383 | 1.73  | Normal up vs Off IS Tolerant   |
| 1558512_PM_at  | ---                                   | ---                                                                                     | 0.00383 | 1.35  | Normal up vs Off IS Tolerant   |
| 223415_PM_at   | RPP25                                 | ribonuclease P/MRP 25kDa subunit                                                        | 0.00383 | -1.44 | Normal down vs Off IS Tolerant |

|                 |           |                                                                                         |         |       |                                |
|-----------------|-----------|-----------------------------------------------------------------------------------------|---------|-------|--------------------------------|
| 205076_PM_s_at  | MTMR11    | myotubularin related protein 11                                                         | 0.00384 | -1.52 | Normal down vs Off IS Tolerant |
| 242344_PM_at    | GABRB2    | gamma-aminobutyric acid (GABA) A receptor, beta 2                                       | 0.00384 | -1.51 | Normal down vs Off IS Tolerant |
| 215703_PM_at    | CFTR      | cystic fibrosis transmembrane conductance regulator (ATP-binding cassette sub-family C, | 0.00384 | -1.26 | Normal down vs Off IS Tolerant |
| 1570009_PM_at   | LOC643711 | platelet-activating factor acetylhydrolase, isoform Ib, beta subunit 30kDa pseudogene   | 0.00384 | -1.35 | Normal down vs Off IS Tolerant |
| 1563945_PM_at   | LOC284100 | tyrosine 3-monooxygenase/tryptophan 5-monooxygenase activation protein, epsilon polypep | 0.00384 | -1.30 | Normal down vs Off IS Tolerant |
| 239861_PM_at    | ---       | ---                                                                                     | 0.00385 | -1.94 | Normal down vs Off IS Tolerant |
| 241471_PM_at    | ---       | ---                                                                                     | 0.00386 | -1.37 | Normal down vs Off IS Tolerant |
| 224218_PM_s_at  | TRPS1     | trichorhinophalangeal syndrome I                                                        | 0.00387 | -1.61 | Normal down vs Off IS Tolerant |
| 39763_PM_at     | HPX       | hemopexin                                                                               | 0.00387 | -1.22 | Normal down vs Off IS Tolerant |
| 215033_PM_at    | TM4SF1    | transmembrane 4 L six family member 1                                                   | 0.00388 | -1.22 | Normal down vs Off IS Tolerant |
| 218585_PM_s_at  | DTL       | denticleless homolog (Drosophila)                                                       | 0.00388 | -1.52 | Normal down vs Off IS Tolerant |
| 233368_PM_s_at  | DNAJC27   | DnaJ (Hsp40) homolog, subfamily C, member 27                                            | 0.00389 | 1.34  | Normal up vs Off IS Tolerant   |
| 1553989_PM_a_at | ATP6V1C2  | ATPase, H+ transporting, lysosomal 42kDa, V1 subunit C2                                 | 0.00389 | -1.21 | Normal down vs Off IS Tolerant |
| 243565_PM_at    | CCDC150   | coiled-coil domain containing 150                                                       | 0.00389 | -1.44 | Normal down vs Off IS Tolerant |
| 1554952_PM_s_at | NLRP12    | NLR family, pyrin domain containing 12                                                  | 0.00389 | -1.61 | Normal down vs Off IS Tolerant |
| 240044_PM_x_at  | TNRC6B    | Trinucleotide repeat containing 6B                                                      | 0.00389 | 1.52  | Normal up vs Off IS Tolerant   |



|                |          |                                                |         |       |                                |
|----------------|----------|------------------------------------------------|---------|-------|--------------------------------|
| 209863_PM_s_at | TP63     | tumor protein p63                              | 0.00389 | -1.60 | Normal down vs Off IS Tolerant |
| 223162_PM_s_at | KIAA1147 | KIAA1147                                       | 0.00390 | 1.34  | Normal up vs Off IS Tolerant   |
| 222129_PM_at   | FAM134A  | family with sequence similarity 134, member A  | 0.00390 | 1.45  | Normal up vs Off IS Tolerant   |
| 212283_PM_at   | AGRN     | agrin                                          | 0.00390 | -1.21 | Normal down vs Off IS Tolerant |
| 219717_PM_at   | DCAF16   | DDB1 and CUL4 associated factor 16             | 0.00391 | 1.80  | Normal up vs Off IS Tolerant   |
| 230938_PM_x_at | ATF5     | activating transcription factor 5              | 0.00391 | -1.41 | Normal down vs Off IS Tolerant |
| 204847_PM_at   | ZBTB11   | zinc finger and BTB domain containing 11       | 0.00391 | 1.43  | Normal up vs Off IS Tolerant   |
| 230145_PM_at   | DUS3L    | Dihydrouridine synthase 3-like (S. cerevisiae) | 0.00391 | -1.19 | Normal down vs Off IS Tolerant |
| 237108_PM_x_at | FLJ42875 | hypothetical LOC440556                         | 0.00391 | -1.27 | Normal down vs Off IS Tolerant |
| 220107_PM_s_at | FAM164C  | family with sequence similarity 164, member C  | 0.00391 | -1.16 | Normal down vs Off IS Tolerant |
| 222720_PM_x_at | C1orf27  | chromosome 1 open reading frame 27             | 0.00391 | 1.28  | Normal up vs Off IS Tolerant   |
| 231710_PM_at   | CAPS     | calcyphosine                                   | 0.00392 | -1.40 | Normal down vs Off IS Tolerant |
| 223618_PM_at   | FMN2     | formin 2                                       | 0.00392 | -1.46 | Normal down vs Off IS Tolerant |
| 214324_PM_at   | GP2      | glycoprotein 2 (zymogen granule membrane)      | 0.00392 | -1.20 | Normal down vs Off IS Tolerant |
| 207770_PM_x_at | CSH2     | chorionic somatomammotropin hormone 2          | 0.00392 | -1.29 | Normal down vs Off IS Tolerant |
| 222523_PM_at   | SENP2    | SUMO1/sentrin/SMT3 specific peptidase 2        | 0.00392 | 1.58  | Normal up vs Off IS Tolerant   |
| 243880_PM_at   | GOSR2    | Golgi SNAP receptor complex member 2           | 0.00393 | 1.40  | Normal up vs Off IS Tolerant   |
| 1556121_PM_at  | NAP1L1   | nucleosome assembly protein 1-like 1           | 0.00393 | 1.42  | Normal up vs Off IS Tolerant   |
| 200875_PM_s_at | NOP56    | NOP56 ribonucleoprotein homolog (yeast)        | 0.00394 | 1.24  | Normal up vs Off IS Tolerant   |
| 225218_PM_at   | ZFYVE27  | zinc finger, FYVE domain containing 27         | 0.00394 | 1.24  | Normal up vs Off IS Tolerant   |

|                 |          |                                                                          |         |       |                                |
|-----------------|----------|--------------------------------------------------------------------------|---------|-------|--------------------------------|
| 206433_PM_s_at  | SPOCK3   | sparc/osteonectin, cwcv and kazal-like domains proteoglycan (testican) 3 | 0.00395 | -1.40 | Normal down vs Off IS Tolerant |
| 236916_PM_at    | ---      | ---                                                                      | 0.00395 | 1.26  | Normal up vs Off IS Tolerant   |
| 226341_PM_at    | ---      | ---                                                                      | 0.00396 | 1.43  | Normal up vs Off IS Tolerant   |
| 232449_PM_at    | BCO2     | beta-carotene oxygenase 2                                                | 0.00396 | -1.26 | Normal down vs Off IS Tolerant |
| 229370_PM_at    | ---      | ---                                                                      | 0.00396 | 1.61  | Normal up vs Off IS Tolerant   |
| 201649_PM_at    | UBE2L6   | ubiquitin-conjugating enzyme E2L 6                                       | 0.00397 | -1.33 | Normal down vs Off IS Tolerant |
| 209791_PM_at    | PADI2    | peptidyl arginine deiminase, type II                                     | 0.00397 | -1.80 | Normal down vs Off IS Tolerant |
| 234882_PM_at    | ---      | ---                                                                      | 0.00397 | -1.38 | Normal down vs Off IS Tolerant |
| 1555225_PM_at   | C1orf43  | chromosome 1 open reading frame 43                                       | 0.00398 | 1.60  | Normal up vs Off IS Tolerant   |
| 209439_PM_s_at  | PHKA2    | phosphorylase kinase, alpha 2 (liver)                                    | 0.00398 | 1.26  | Normal up vs Off IS Tolerant   |
| AFFX-BioB-M_at  | ---      | ---                                                                      | 0.00398 | -1.97 | Normal down vs Off IS Tolerant |
| 227375_PM_at    | ANKRD13C | ankyrin repeat domain 13C                                                | 0.00398 | 1.66  | Normal up vs Off IS Tolerant   |
| 1562463_PM_at   | ---      | ---                                                                      | 0.00398 | -1.23 | Normal down vs Off IS Tolerant |
| 1554800_PM_at   | RAB39    | RAB39, member RAS oncogene family                                        | 0.00399 | -1.21 | Normal down vs Off IS Tolerant |
| 240951_PM_at    | RORA     | RAR-related orphan receptor A                                            | 0.00399 | -1.39 | Normal down vs Off IS Tolerant |
| 239278_PM_at    | ---      | ---                                                                      | 0.00399 | 1.88  | Normal up vs Off IS Tolerant   |
| 225904_PM_at    | C1orf96  | chromosome 1 open reading frame 96                                       | 0.00399 | 1.41  | Normal up vs Off IS Tolerant   |
| 1562270_PM_at   | ARHGEF7  | Rho guanine nucleotide exchange factor (GEF) 7                           | 0.00399 | 1.48  | Normal up vs Off IS Tolerant   |
| 1563674_PM_at   | FCRL2    | Fc receptor-like 2                                                       | 0.00399 | -1.91 | Normal down vs Off IS Tolerant |
| 208101_PM_s_at  | URM1     | ubiquitin related modifier 1                                             | 0.00399 | -1.20 | Normal down vs Off IS Tolerant |
| 1555491_PM_a_at | C19orf66 | chromosome 19 open reading frame 66                                      | 0.00399 | 1.37  | Normal up vs Off IS Tolerant   |

|                |          |                                                                                         |         |       |                                |
|----------------|----------|-----------------------------------------------------------------------------------------|---------|-------|--------------------------------|
| 207094_PM_at   | CXCR1    | chemokine (C-X-C motif) receptor 1                                                      | 0.00400 | -1.23 | Normal down vs Off IS Tolerant |
| 223319_PM_at   | GPHN     | gephyrin                                                                                | 0.00400 | 1.39  | Normal up vs Off IS Tolerant   |
| 207177_PM_at   | PTGFR    | prostaglandin F receptor (FP)                                                           | 0.00400 | -1.21 | Normal down vs Off IS Tolerant |
| 221493_PM_at   | TSPYL1   | TSPY-like 1                                                                             | 0.00400 | 1.38  | Normal up vs Off IS Tolerant   |
| 218069_PM_at   | DCTPP1   | dCTP pyrophosphatase 1                                                                  | 0.00401 | -1.34 | Normal down vs Off IS Tolerant |
| 228348_PM_at   | LINS     | lines homolog (Drosophila)                                                              | 0.00401 | 1.60  | Normal up vs Off IS Tolerant   |
| 229968_PM_at   | ---      | ---                                                                                     | 0.00401 | -1.78 | Normal down vs Off IS Tolerant |
| 1559105_PM_at  | LEKR1    | leucine, glutamate and lysine rich 1                                                    | 0.00401 | -1.44 | Normal down vs Off IS Tolerant |
| 239036_PM_at   | ---      | ---                                                                                     | 0.00401 | -1.35 | Normal down vs Off IS Tolerant |
| 235493_PM_at   | ---      | ---                                                                                     | 0.00402 | 1.58  | Normal up vs Off IS Tolerant   |
| 226925_PM_at   | ACPL2    | acid phosphatase-like 2                                                                 | 0.00402 | 1.51  | Normal up vs Off IS Tolerant   |
| 205619_PM_s_at | MEOX1    | mesenchyme homeobox 1                                                                   | 0.00402 | 1.32  | Normal up vs Off IS Tolerant   |
| 215579_PM_at   | APOBEC3G | apolipoprotein B mRNA editing enzyme, catalytic polypeptide-like 3G                     | 0.00402 | -1.29 | Normal down vs Off IS Tolerant |
| 207188_PM_at   | CDK3     | cyclin-dependent kinase 3                                                               | 0.00402 | 1.30  | Normal up vs Off IS Tolerant   |
| 202662_PM_s_at | ITPR2    | inositol 1,4,5-triphosphate receptor, type 2                                            | 0.00402 | 1.45  | Normal up vs Off IS Tolerant   |
| 232195_PM_at   | GPR158   | G protein-coupled receptor 158                                                          | 0.00403 | -1.23 | Normal down vs Off IS Tolerant |
| 234584_PM_s_at | ATE1     | arginyltransferase 1                                                                    | 0.00403 | -1.27 | Normal down vs Off IS Tolerant |
| 232454_PM_at   | ---      | ---                                                                                     | 0.00403 | 1.22  | Normal up vs Off IS Tolerant   |
| 228303_PM_at   | GALNT6   | UDP-N-acetyl-alpha-D-galactosamine:polypeptide N-acetylgalactosaminyltransferase 6 (Gal | 0.00403 | -1.33 | Normal down vs Off IS Tolerant |
| 218426_PM_s_at | RNF216   | ring finger protein 216                                                                 | 0.00403 | 1.38  | Normal up vs Off IS Tolerant   |
| 207982_PM_at   | HIST1H1T | histone cluster 1, H1t                                                                  | 0.00403 | 1.37  | Normal up vs Off IS Tolerant   |
| 211466_PM_at   | NFIB     | nuclear factor I/B                                                                      | 0.00404 | -1.43 | Normal down vs Off IS Tolerant |

|                |                  |                                                                                         |         |       |                                |
|----------------|------------------|-----------------------------------------------------------------------------------------|---------|-------|--------------------------------|
| 231782_PM_s_at | KLK4             | kallikrein-related peptidase 4                                                          | 0.00404 | -1.24 | Normal down vs Off IS Tolerant |
| 240449_PM_at   | ZNF341           | zinc finger protein 341                                                                 | 0.00404 | 1.55  | Normal up vs Off IS Tolerant   |
| 202565_PM_s_at | SVIL             | supervillin                                                                             | 0.00405 | 1.48  | Normal up vs Off IS Tolerant   |
| 230390_PM_at   | ---              | ---                                                                                     | 0.00405 | -1.25 | Normal down vs Off IS Tolerant |
| 215377_PM_at   | CTBP2            | C-terminal binding protein 2                                                            | 0.00405 | -1.19 | Normal down vs Off IS Tolerant |
| 235014_PM_at   | LOC147727        | hypothetical LOC147727                                                                  | 0.00406 | 1.54  | Normal up vs Off IS Tolerant   |
| 225066_PM_at   | PPP2R2D          | protein phosphatase 2, regulatory subunit B, delta                                      | 0.00406 | 1.64  | Normal up vs Off IS Tolerant   |
| 238296_PM_at   | GLIPR1L1         | GLI pathogenesis-related 1 like 1                                                       | 0.00406 | -1.26 | Normal down vs Off IS Tolerant |
| 1553523_PM_at  | NLRP14           | NLR family, pyrin domain containing 14                                                  | 0.00406 | -1.34 | Normal down vs Off IS Tolerant |
| 227225_PM_at   | ---              | ---                                                                                     | 0.00406 | -1.29 | Normal down vs Off IS Tolerant |
| 216582_PM_at   | POM121L2         | POM121 membrane glycoprotein-like 2                                                     | 0.00406 | -1.21 | Normal down vs Off IS Tolerant |
| 223087_PM_at   | ECHDC1           | enoyl CoA hydratase domain containing 1                                                 | 0.00407 | -1.56 | Normal down vs Off IS Tolerant |
| 215462_PM_at   | PLK3             | polo-like kinase 3                                                                      | 0.00407 | 1.68  | Normal up vs Off IS Tolerant   |
| 223100_PM_s_at | NUDT5            | nudix (nucleoside diphosphate linked moiety X)-type motif 5                             | 0.00407 | -1.33 | Normal down vs Off IS Tolerant |
| 243264_PM_s_at | C8orf44 /// SGK3 | chromosome 8 open reading frame 44 /// serum/glucocorticoid regulated kinase family, me | 0.00407 | 1.46  | Normal up vs Off IS Tolerant   |
| 231482_PM_at   | ---              | ---                                                                                     | 0.00408 | -1.32 | Normal down vs Off IS Tolerant |
| 218404_PM_at   | SNX10            | sorting nexin 10                                                                        | 0.00408 | -1.32 | Normal down vs Off IS Tolerant |
| 213109_PM_at   | TNIK             | TRAF2 and NCK interacting kinase                                                        | 0.00409 | 1.49  | Normal up vs Off IS Tolerant   |
| 227209_PM_at   | CNTN1            | Contactin 1                                                                             | 0.00409 | -1.41 | Normal down vs Off IS Tolerant |

|                 |               |                                                                      |         |       |                                |
|-----------------|---------------|----------------------------------------------------------------------|---------|-------|--------------------------------|
| 226146_PM_at    | ---           | ---                                                                  | 0.00409 | -1.31 | Normal down vs Off IS Tolerant |
| 1558275_PM_at   | ---           | ---                                                                  | 0.00409 | 1.28  | Normal up vs Off IS Tolerant   |
| 208002_PM_s_at  | ACOT7         | acyl-CoA thioesterase 7                                              | 0.00409 | 1.56  | Normal up vs Off IS Tolerant   |
| 218225_PM_at    | ECSIT         | ECSIT homolog (Drosophila)                                           | 0.00410 | 1.35  | Normal up vs Off IS Tolerant   |
| 230321_PM_at    | TOR1AIP2      | torsin A interacting protein 2                                       | 0.00410 | -1.27 | Normal down vs Off IS Tolerant |
| 234286_PM_at    | PPP1R12C      | protein phosphatase 1, regulatory (inhibitor) subunit 12C            | 0.00410 | -1.22 | Normal down vs Off IS Tolerant |
| 209881_PM_s_at  | LAT /// SPNS1 | linker for activation of T cells /// spinster homolog 1 (Drosophila) | 0.00410 | 1.54  | Normal up vs Off IS Tolerant   |
| 226972_PM_s_at  | CCDC136       | coiled-coil domain containing 136                                    | 0.00410 | 1.25  | Normal up vs Off IS Tolerant   |
| 230090_PM_at    | GDNF          | glial cell derived neurotrophic factor                               | 0.00411 | -1.24 | Normal down vs Off IS Tolerant |
| 231002_PM_s_at  | RABEP1        | Rabaptin, RAB GTPase binding effector protein 1                      | 0.00411 | 1.39  | Normal up vs Off IS Tolerant   |
| 215358_PM_x_at  | ZNF37BP       | zinc finger protein 37B, pseudogene                                  | 0.00411 | 1.74  | Normal up vs Off IS Tolerant   |
| 234991_PM_at    | ZXDC          | ZXD family zinc finger C                                             | 0.00412 | 1.77  | Normal up vs Off IS Tolerant   |
| 234179_PM_at    | ---           | ---                                                                  | 0.00413 | 1.55  | Normal up vs Off IS Tolerant   |
| 232151_PM_at    | MACC1         | metastasis associated in colon cancer 1                              | 0.00413 | -1.25 | Normal down vs Off IS Tolerant |
| 225343_PM_at    | TMED8         | transmembrane emp24 protein transport domain containing 8            | 0.00413 | -1.24 | Normal down vs Off IS Tolerant |
| 1562908_PM_at   | LOC339468     | hypothetical protein LOC339468                                       | 0.00413 | -1.41 | Normal down vs Off IS Tolerant |
| 231533_PM_at    | ---           | ---                                                                  | 0.00413 | 1.19  | Normal up vs Off IS Tolerant   |
| 241692_PM_at    | ---           | ---                                                                  | 0.00413 | 1.67  | Normal up vs Off IS Tolerant   |
| 1558540_PM_s_at | SLC2A11       | solute carrier family 2 (facilitated glucose transporter), member 11 | 0.00414 | 1.34  | Normal up vs Off IS Tolerant   |
| 225197_PM_at    | ---           | ---                                                                  | 0.00414 | 1.30  | Normal up vs Off IS Tolerant   |
| 201420_PM_s_at  | WDR77         | WD repeat domain 77                                                  | 0.00414 | -1.41 | Normal down vs Off IS Tolerant |
| 214817_PM_at    | UNC13A        | unc-13 homolog A (C. elegans)                                        | 0.00415 | -1.24 | Normal down vs Off IS Tolerant |

|                 |         |                                                      |         |       |                                |
|-----------------|---------|------------------------------------------------------|---------|-------|--------------------------------|
| 235125_PM_x_at  | FAM73A  | family with sequence similarity 73, member A         | 0.00415 | 1.59  | Normal up vs Off IS Tolerant   |
| 210644_PM_s_at  | LAIR1   | leukocyte-associated immunoglobulin-like receptor 1  | 0.00415 | -1.39 | Normal down vs Off IS Tolerant |
| 215076_PM_s_at  | COL3A1  | collagen, type III, alpha 1                          | 0.00415 | -1.59 | Normal down vs Off IS Tolerant |
| 222907_PM_x_at  | TMEM50B | transmembrane protein 50B                            | 0.00416 | 1.42  | Normal up vs Off IS Tolerant   |
| 228835_PM_at    | ---     | ---                                                  | 0.00416 | 1.55  | Normal up vs Off IS Tolerant   |
| 241461_PM_at    | ---     | ---                                                  | 0.00416 | -1.31 | Normal down vs Off IS Tolerant |
| 235335_PM_at    | ABCA9   | ATP-binding cassette, sub-family A (ABC1), member 9  | 0.00416 | -1.24 | Normal down vs Off IS Tolerant |
| 225856_PM_at    | ---     | ---                                                  | 0.00416 | 1.45  | Normal up vs Off IS Tolerant   |
| 222555_PM_s_at  | MRPL44  | mitochondrial ribosomal protein L44                  | 0.00416 | 1.76  | Normal up vs Off IS Tolerant   |
| 235979_PM_at    | ---     | ---                                                  | 0.00416 | -1.29 | Normal down vs Off IS Tolerant |
| 1562238_PM_at   | USPL1   | ubiquitin specific peptidase like 1                  | 0.00416 | 1.46  | Normal up vs Off IS Tolerant   |
| 201189_PM_s_at  | ITPR3   | inositol 1,4,5-triphosphate receptor, type 3         | 0.00416 | 1.53  | Normal up vs Off IS Tolerant   |
| 1554126_PM_at   | MSRB3   | methionine sulfoxide reductase B3                    | 0.00417 | -1.61 | Normal down vs Off IS Tolerant |
| 212439_PM_at    | IP6K1   | inositol hexakisphosphate kinase 1                   | 0.00418 | 1.33  | Normal up vs Off IS Tolerant   |
| 212316_PM_at    | NUP210  | nucleoporin 210kDa                                   | 0.00418 | 1.34  | Normal up vs Off IS Tolerant   |
| 1552627_PM_a_at | ARHGAP5 | Rho GTPase activating protein 5                      | 0.00418 | 1.51  | Normal up vs Off IS Tolerant   |
| 236121_PM_at    | OR51E2  | olfactory receptor, family 51, subfamily E, member 2 | 0.00418 | -1.24 | Normal down vs Off IS Tolerant |
| 1559642_PM_a_at | ---     | ---                                                  | 0.00418 | -1.19 | Normal down vs Off IS Tolerant |
| 231579_PM_s_at  | TIMP2   | TIMP metalloproteinase inhibitor 2                   | 0.00418 | -1.39 | Normal down vs Off IS Tolerant |
| 227022_PM_at    | GNPDA2  | glucosamine-6-phosphate deaminase 2                  | 0.00418 | 1.48  | Normal up vs Off IS Tolerant   |
| 240379_PM_at    | PKP4    | plakophilin 4                                        | 0.00419 | -1.27 | Normal down vs Off IS Tolerant |
| 203463_PM_s_at  | EPN2    | epsin 2                                              | 0.00420 | 1.33  | Normal up vs Off IS Tolerant   |

|                 |                        |                                                                                         |         |       |                                |
|-----------------|------------------------|-----------------------------------------------------------------------------------------|---------|-------|--------------------------------|
| 221437_PM_s_at  | MRPS15                 | mitochondrial ribosomal protein S15                                                     | 0.00420 | 1.42  | Normal up vs Off IS Tolerant   |
| 242287_PM_at    | CLIP1                  | CAP-GLY domain containing linker protein 1                                              | 0.00420 | 1.38  | Normal up vs Off IS Tolerant   |
| 240125_PM_at    | ---                    | ---                                                                                     | 0.00420 | -1.56 | Normal down vs Off IS Tolerant |
| 223980_PM_s_at  | SP110                  | SP110 nuclear body protein                                                              | 0.00420 | -1.45 | Normal down vs Off IS Tolerant |
| 1553457_PM_at   | NCRNA00269             | non-protein coding RNA 269                                                              | 0.00421 | -1.21 | Normal down vs Off IS Tolerant |
| 1564773_PM_x_at | ---                    | ---                                                                                     | 0.00421 | 1.36  | Normal up vs Off IS Tolerant   |
| 202182_PM_at    | KAT2A                  | K(lysine) acetyltransferase 2A                                                          | 0.00421 | 1.27  | Normal up vs Off IS Tolerant   |
| 244105_PM_at    | WHAMML1 ///<br>WHAMML2 | WAS protein homolog associated with actin, golgi membranes and microtubules-like 1 (pse | 0.00421 | 1.36  | Normal up vs Off IS Tolerant   |
| 225879_PM_at    | TSEN54                 | tRNA splicing endonuclease 54 homolog (S. cerevisiae)                                   | 0.00421 | 1.51  | Normal up vs Off IS Tolerant   |
| 225815_PM_at    | CPLX2                  | complexin 2                                                                             | 0.00421 | -1.19 | Normal down vs Off IS Tolerant |
| 216619_PM_at    | GTPBP10                | GTP-binding protein 10 (putative)                                                       | 0.00422 | -1.34 | Normal down vs Off IS Tolerant |
| 238267_PM_s_at  | ---                    | ---                                                                                     | 0.00422 | -1.44 | Normal down vs Off IS Tolerant |
| 1555380_PM_at   | ADAMTS4                | ADAM metallopeptidase with thrombospondin type 1 motif, 4                               | 0.00422 | -1.20 | Normal down vs Off IS Tolerant |
| 40489_PM_at     | ATN1                   | atrophin 1                                                                              | 0.00423 | -1.16 | Normal down vs Off IS Tolerant |
| 227732_PM_at    | ATXN7L1                | ataxin 7-like 1                                                                         | 0.00423 | 1.34  | Normal up vs Off IS Tolerant   |
| 213106_PM_at    | ATP8A1                 | ATPase, aminophospholipid transporter (APLT), class I, type 8A, member 1                | 0.00423 | 1.38  | Normal up vs Off IS Tolerant   |
| 233551_PM_at    | LOC642776              | hypothetical LOC642776                                                                  | 0.00423 | -1.40 | Normal down vs Off IS Tolerant |
| 1555132_PM_at   | ---                    | ---                                                                                     | 0.00423 | -1.22 | Normal down vs Off IS Tolerant |

|                 |          |                                                      |         |       |                                |
|-----------------|----------|------------------------------------------------------|---------|-------|--------------------------------|
| 212115_PM_at    | HN1L     | hematological and neurological expressed 1-like      | 0.00423 | -1.51 | Normal down vs Off IS Tolerant |
| 212184_PM_s_at  | TAB2     | TGF-beta activated kinase 1/MAP3K7 binding protein 2 | 0.00423 | 1.30  | Normal up vs Off IS Tolerant   |
| 235475_PM_at    | SERP1    | Stress-associated endoplasmic reticulum protein 1    | 0.00424 | 1.28  | Normal up vs Off IS Tolerant   |
| 1553551_PM_s_at | ND2      | MTND2                                                | 0.00424 | 1.29  | Normal up vs Off IS Tolerant   |
| 240294_PM_at    | HIPK2    | homeodomain interacting protein kinase 2             | 0.00424 | 1.23  | Normal up vs Off IS Tolerant   |
| 244021_PM_at    | ---      | ---                                                  | 0.00424 | 1.53  | Normal up vs Off IS Tolerant   |
| 221260_PM_s_at  | CSRNP2   | cysteine-serine-rich nuclear protein 2               | 0.00425 | 1.63  | Normal up vs Off IS Tolerant   |
| 236147_PM_at    | ---      | ---                                                  | 0.00425 | -1.24 | Normal down vs Off IS Tolerant |
| 208136_PM_s_at  | MGC3771  | hypothetical LOC81854                                | 0.00425 | -1.21 | Normal down vs Off IS Tolerant |
| 237702_PM_at    | RBM45    | RNA binding motif protein 45                         | 0.00425 | -1.24 | Normal down vs Off IS Tolerant |
| 200042_PM_at    | C22orf28 | chromosome 22 open reading frame 28                  | 0.00425 | -1.30 | Normal down vs Off IS Tolerant |
| 215694_PM_at    | SPATA5L1 | spermatogenesis associated 5-like 1                  | 0.00426 | 1.76  | Normal up vs Off IS Tolerant   |
| 1570423_PM_at   | ---      | ---                                                  | 0.00426 | -1.70 | Normal down vs Off IS Tolerant |
| 227598_PM_at    | C7orf29  | chromosome 7 open reading frame 29                   | 0.00426 | 1.39  | Normal up vs Off IS Tolerant   |
| 212863_PM_x_at  | CTBP1    | C-terminal binding protein 1                         | 0.00427 | 1.16  | Normal up vs Off IS Tolerant   |
| 215640_PM_at    | TBC1D2B  | TBC1 domain family, member 2B                        | 0.00427 | 1.60  | Normal up vs Off IS Tolerant   |
| 1552672_PM_a_at | IGSF3    | immunoglobulin superfamily, member 3                 | 0.00427 | -1.22 | Normal down vs Off IS Tolerant |
| 217085_PM_at    | ---      | ---                                                  | 0.00428 | -1.27 | Normal down vs Off IS Tolerant |
| 242904_PM_x_at  | ---      | ---                                                  | 0.00428 | 1.71  | Normal up vs Off IS Tolerant   |
| 1557080_PM_s_at | ITGBL1   | integrin, beta-like 1 (with EGF-like repeat domains) | 0.00428 | -1.86 | Normal down vs Off IS Tolerant |
| 220730_PM_at    | ZNF778   | zinc finger protein 778                              | 0.00428 | 1.32  | Normal up vs Off IS Tolerant   |
| 234953_PM_x_at  | ZNF19    | zinc finger protein 19                               | 0.00428 | 1.27  | Normal up vs Off IS Tolerant   |



|                 |         |                                                                                           |         |       |                                |
|-----------------|---------|-------------------------------------------------------------------------------------------|---------|-------|--------------------------------|
| 1562389_PM_at   | ---     | ---                                                                                       | 0.00428 | -1.82 | Normal down vs Off IS Tolerant |
| 243800_PM_at    | NR1H4   | nuclear receptor subfamily 1, group H, member 4                                           | 0.00428 | -1.77 | Normal down vs Off IS Tolerant |
| 214475_PM_x_at  | CAPN3   | calpain 3, (p94)                                                                          | 0.00428 | 1.40  | Normal up vs Off IS Tolerant   |
| 1563913_PM_at   | ---     | ---                                                                                       | 0.00429 | -1.25 | Normal down vs Off IS Tolerant |
| 244334_PM_at    | TRAM1L1 | translocation associated membrane protein 1-like 1                                        | 0.00430 | -1.36 | Normal down vs Off IS Tolerant |
| 234395_PM_at    | ---     | ---                                                                                       | 0.00430 | -1.35 | Normal down vs Off IS Tolerant |
| 225529_PM_at    | ACAP3   | ArfGAP with coiled-coil, ankyrin repeat and PH domains 3                                  | 0.00430 | 1.50  | Normal up vs Off IS Tolerant   |
| 218131_PM_s_at  | GATAD2A | GATA zinc finger domain containing 2A                                                     | 0.00430 | 1.29  | Normal up vs Off IS Tolerant   |
| 1553705_PM_a_at | CHRM3   | cholinergic receptor, muscarinic 3                                                        | 0.00431 | -1.29 | Normal down vs Off IS Tolerant |
| 203216_PM_s_at  | MYO6    | myosin VI                                                                                 | 0.00431 | 1.44  | Normal up vs Off IS Tolerant   |
| 202059_PM_s_at  | KPNA1   | karyopherin alpha 1 (importin alpha 5)                                                    | 0.00431 | 1.38  | Normal up vs Off IS Tolerant   |
| 222837_PM_s_at  | NAA15   | N(alpha)-acetyltransferase 15, NatA auxiliary subunit                                     | 0.00431 | 1.78  | Normal up vs Off IS Tolerant   |
| 208629_PM_s_at  | HADHA   | hydroxyacyl-CoA dehydrogenase/3-ketoacyl-CoA thiolase/enoyl-CoA hydratase (trifunctional) | 0.00431 | -1.42 | Normal down vs Off IS Tolerant |
| 214630_PM_at    | CYP11B2 | cytochrome P450, family 11, subfamily B, polypeptide 2                                    | 0.00432 | -1.32 | Normal down vs Off IS Tolerant |
| 205893_PM_at    | NLGN1   | neuroligin 1                                                                              | 0.00432 | -1.40 | Normal down vs Off IS Tolerant |
| 218698_PM_at    | APIP    | APAF1 interacting protein                                                                 | 0.00432 | -1.31 | Normal down vs Off IS Tolerant |
| 234640_PM_x_at  | ---     | ---                                                                                       | 0.00432 | -3.62 | Normal down vs Off IS Tolerant |
| 238652_PM_at    | ---     | ---                                                                                       | 0.00433 | 1.36  | Normal up vs Off IS Tolerant   |
| 1561489_PM_at   | ---     | ---                                                                                       | 0.00433 | -1.98 | Normal down vs Off IS Tolerant |

|                 |              |                                                                  |         |       |                                |
|-----------------|--------------|------------------------------------------------------------------|---------|-------|--------------------------------|
| 218648_PM_at    | CRTC3        | CREB regulated transcription coactivator 3                       | 0.00433 | 1.30  | Normal up vs Off IS Tolerant   |
| 231062_PM_at    | LOC100129122 | Hypothetical LOC100129122                                        | 0.00433 | 1.28  | Normal up vs Off IS Tolerant   |
| 1557433_PM_at   | ---          | ---                                                              | 0.00433 | -1.60 | Normal down vs Off IS Tolerant |
| 209907_PM_s_at  | ITSN2        | intersectin 2                                                    | 0.00433 | 1.23  | Normal up vs Off IS Tolerant   |
| 34406_PM_at     | PACS2        | phosphofurin acidic cluster sorting protein 2                    | 0.00434 | 1.31  | Normal up vs Off IS Tolerant   |
| 216626_PM_at    | ---          | ---                                                              | 0.00434 | -1.33 | Normal down vs Off IS Tolerant |
| 222481_PM_at    | FXC1         | fracture callus 1 homolog (rat)                                  | 0.00434 | 1.40  | Normal up vs Off IS Tolerant   |
| 202881_PM_x_at  | ---          | ---                                                              | 0.00434 | -1.32 | Normal down vs Off IS Tolerant |
| 238451_PM_at    | MPP7         | membrane protein, palmitoylated 7 (MAGUK p55 subfamily member 7) | 0.00435 | 2.02  | Normal up vs Off IS Tolerant   |
| 228624_PM_at    | TMEM144      | transmembrane protein 144                                        | 0.00435 | -1.71 | Normal down vs Off IS Tolerant |
| 212313_PM_at    | CHMP7        | CHMP family, member 7                                            | 0.00436 | 1.50  | Normal up vs Off IS Tolerant   |
| 236108_PM_at    | KIAA1632     | KIAA1632                                                         | 0.00436 | 1.28  | Normal up vs Off IS Tolerant   |
| 215466_PM_at    | ---          | ---                                                              | 0.00436 | -1.33 | Normal down vs Off IS Tolerant |
| 217736_PM_s_at  | EIF2AK1      | eukaryotic translation initiation factor 2-alpha kinase 1        | 0.00436 | 1.39  | Normal up vs Off IS Tolerant   |
| 218260_PM_at    | DDA1         | DET1 and DDB1 associated 1                                       | 0.00436 | 1.77  | Normal up vs Off IS Tolerant   |
| 229857_PM_s_at  | LOC644246    | Hypothetical protein LOC644246                                   | 0.00436 | -1.23 | Normal down vs Off IS Tolerant |
| 1557406_PM_s_at | LOC100130111 | hypothetical LOC100130111                                        | 0.00436 | -1.31 | Normal down vs Off IS Tolerant |
| 226929_PM_at    | MTHFR        | methylenetetrahydrofolate reductase (NAD(P)H)                    | 0.00436 | 1.45  | Normal up vs Off IS Tolerant   |
| 220267_PM_at    | KRT24        | keratin 24                                                       | 0.00436 | -1.35 | Normal down vs Off IS Tolerant |
| 239715_PM_at    | ---          | ---                                                              | 0.00437 | -1.41 | Normal down vs Off IS Tolerant |

|                          |          |                                                                        |         |       |                                |
|--------------------------|----------|------------------------------------------------------------------------|---------|-------|--------------------------------|
| 240147_PM_at             | C7orf50  | chromosome 7 open reading frame 50                                     | 0.00437 | -1.36 | Normal down vs Off IS Tolerant |
| 209648_PM_x_at           | SOCS5    | suppressor of cytokine signaling 5                                     | 0.00438 | 1.53  | Normal up vs Off IS Tolerant   |
| 1552716_PM_at            | SPEF2    | sperm flagellar 2                                                      | 0.00438 | 1.35  | Normal up vs Off IS Tolerant   |
| 210878_PM_s_at           | KDM3B    | lysine (K)-specific demethylase 3B                                     | 0.00438 | 1.18  | Normal up vs Off IS Tolerant   |
| 238346_PM_s_at           | TGS1     | trimethylguanosine synthase 1                                          | 0.00438 | 1.37  | Normal up vs Off IS Tolerant   |
| 202320_PM_at             | GTF3C1   | general transcription factor IIIC,<br>polypeptide 1, alpha 220kDa      | 0.00438 | 1.46  | Normal up vs Off IS Tolerant   |
| 239729_PM_at             | ---      | ---                                                                    | 0.00439 | 1.26  | Normal up vs Off IS Tolerant   |
| 225246_PM_at             | STIM2    | stromal interaction molecule 2                                         | 0.00439 | 1.49  | Normal up vs Off IS Tolerant   |
| 237394_PM_at             | ---      | ---                                                                    | 0.00439 | -1.24 | Normal down vs Off IS Tolerant |
| 240762_PM_at             | ---      | ---                                                                    | 0.00439 | 1.64  | Normal up vs Off IS Tolerant   |
| 235025_PM_at             | WDR89    | WD repeat domain 89                                                    | 0.00440 | 1.35  | Normal up vs Off IS Tolerant   |
| 213119_PM_at             | SLC36A1  | solute carrier family 36 (proton/amino<br>acid symporter), member 1    | 0.00440 | -1.45 | Normal down vs Off IS Tolerant |
| 1564544_PM_x_at          | ---      | ---                                                                    | 0.00440 | -1.30 | Normal down vs Off IS Tolerant |
| 1555447_PM_at            | GPR114   | G protein-coupled receptor 114                                         | 0.00440 | -1.20 | Normal down vs Off IS Tolerant |
| 1554475_PM_a_at          | C19orf47 | chromosome 19 open reading frame 47                                    | 0.00440 | -1.34 | Normal down vs Off IS Tolerant |
| 213792_PM_s_at           | INSR     | insulin receptor                                                       | 0.00440 | -1.43 | Normal down vs Off IS Tolerant |
| 233145_PM_at             | CSMD2    | CUB and Sushi multiple domains 2                                       | 0.00440 | -1.28 | Normal down vs Off IS Tolerant |
| 206728_PM_at             | ECE2     | endothelin converting enzyme 2                                         | 0.00441 | -1.26 | Normal down vs Off IS Tolerant |
| 203908_PM_at             | SLC4A4   | solute carrier family 4, sodium<br>bicarbonate cotransporter, member 4 | 0.00441 | 1.57  | Normal up vs Off IS Tolerant   |
| 241200_PM_x_at           | ---      | ---                                                                    | 0.00441 | -1.21 | Normal down vs Off IS Tolerant |
| AFFX-r2-Ec-bioC-<br>5_at | ---      | ---                                                                    | 0.00442 | -1.91 | Normal down vs Off IS Tolerant |

|                |                 |                                                                                         |         |       |                                |
|----------------|-----------------|-----------------------------------------------------------------------------------------|---------|-------|--------------------------------|
| 1561572_PM_at  | ---             | ---                                                                                     | 0.00442 | -1.65 | Normal down vs Off IS Tolerant |
| 227076_PM_at   | NCAPH2          | non-SMC condensin II complex, subunit H2                                                | 0.00442 | 1.32  | Normal up vs Off IS Tolerant   |
| 220119_PM_at   | EPB41L4A        | erythrocyte membrane protein band 4.1 like 4A                                           | 0.00442 | -1.26 | Normal down vs Off IS Tolerant |
| 231064_PM_s_at | ---             | ---                                                                                     | 0.00443 | -1.38 | Normal down vs Off IS Tolerant |
| 205360_PM_at   | ---             | ---                                                                                     | 0.00443 | -1.24 | Normal down vs Off IS Tolerant |
| 237205_PM_at   | NCRNA00238      | non-protein coding RNA 238                                                              | 0.00443 | -1.25 | Normal down vs Off IS Tolerant |
| 217261_PM_at   | TTY2 /// TTTY2B | testis-specific transcript, Y-linked 2 (non-protein coding) /// testis-specific transcr | 0.00443 | -1.23 | Normal down vs Off IS Tolerant |
| 221317_PM_x_at | PCDHB6          | protocadherin beta 6                                                                    | 0.00444 | -1.24 | Normal down vs Off IS Tolerant |
| 235758_PM_at   | LOC100287428    | similar to paraneoplastic antigen-like protein 6A                                       | 0.00444 | -1.20 | Normal down vs Off IS Tolerant |
| 230667_PM_at   | C10orf84        | chromosome 10 open reading frame 84                                                     | 0.00444 | 1.37  | Normal up vs Off IS Tolerant   |
| 1559688_PM_at  | GRAPL           | GRB2-related adaptor protein-like                                                       | 0.00444 | -4.94 | Normal down vs Off IS Tolerant |
| 242214_PM_at   | RPS27A          | ribosomal protein S27a                                                                  | 0.00444 | 1.57  | Normal up vs Off IS Tolerant   |
| 207492_PM_at   | NGLY1           | N-glycanase 1                                                                           | 0.00444 | 1.79  | Normal up vs Off IS Tolerant   |
| 223762_PM_at   | TMOD4           | tropomodulin 4 (muscle)                                                                 | 0.00444 | 1.28  | Normal up vs Off IS Tolerant   |
| 239478_PM_x_at | ---             | ---                                                                                     | 0.00445 | 1.49  | Normal up vs Off IS Tolerant   |
| 239469_PM_at   | ---             | ---                                                                                     | 0.00445 | 1.49  | Normal up vs Off IS Tolerant   |
| 204168_PM_at   | MGST2           | microsomal glutathione S-transferase 2                                                  | 0.00445 | -1.46 | Normal down vs Off IS Tolerant |
| 244238_PM_at   | ---             | ---                                                                                     | 0.00445 | -1.23 | Normal down vs Off IS Tolerant |
| 222270_PM_at   | SMEK2           | SMEK homolog 2, suppressor of mek1 (Dictyostelium)                                      | 0.00446 | 1.67  | Normal up vs Off IS Tolerant   |

|                |          |                                                                             |         |       |                                |
|----------------|----------|-----------------------------------------------------------------------------|---------|-------|--------------------------------|
| 1560490_PM_at  | FAT3     | FAT tumor suppressor homolog 3 (Drosophila)                                 | 0.00446 | -1.47 | Normal down vs Off IS Tolerant |
| 229182_PM_at   | TMEM199  | transmembrane protein 199                                                   | 0.00446 | 1.47  | Normal up vs Off IS Tolerant   |
| 233076_PM_at   | JAKMIP3  | Janus kinase and microtubule interacting protein 3                          | 0.00446 | -1.30 | Normal down vs Off IS Tolerant |
| 1559094_PM_at  | FBXO9    | F-box protein 9                                                             | 0.00446 | 1.54  | Normal up vs Off IS Tolerant   |
| 225634_PM_at   | ZC3HAV1  | zinc finger CCCH-type, antiviral 1                                          | 0.00447 | 1.33  | Normal up vs Off IS Tolerant   |
| 220665_PM_at   | LUZP4    | leucine zipper protein 4                                                    | 0.00447 | -1.24 | Normal down vs Off IS Tolerant |
| 1554646_PM_at  | OSBPL1A  | oxysterol binding protein-like 1A                                           | 0.00448 | -1.23 | Normal down vs Off IS Tolerant |
| 202764_PM_at   | STIM1    | stromal interaction molecule 1                                              | 0.00448 | 1.29  | Normal up vs Off IS Tolerant   |
| 219280_PM_at   | BRWD1    | bromodomain and WD repeat domain containing 1                               | 0.00449 | 1.49  | Normal up vs Off IS Tolerant   |
| 214224_PM_s_at | PIN4     | protein (peptidylprolyl cis/trans isomerase) NIMA-interacting, 4 (parvulin) | 0.00449 | -1.41 | Normal down vs Off IS Tolerant |
| 211938_PM_at   | EIF4B    | eukaryotic translation initiation factor 4B                                 | 0.00449 | 1.23  | Normal up vs Off IS Tolerant   |
| 232897_PM_at   | FLJ20444 | hypothetical protein FLJ20444                                               | 0.00449 | -1.52 | Normal down vs Off IS Tolerant |
| 227761_PM_at   | MYO5A    | myosin VA (heavy chain 12, myosin)                                          | 0.00450 | 1.37  | Normal up vs Off IS Tolerant   |
| 209646_PM_x_at | ALDH1B1  | aldehyde dehydrogenase 1 family, member B1                                  | 0.00450 | -1.53 | Normal down vs Off IS Tolerant |
| 229038_PM_at   | CWF19L1  | CWF19-like 1, cell cycle control (S. pombe)                                 | 0.00450 | 1.51  | Normal up vs Off IS Tolerant   |
| 227779_PM_at   | ---      | ---                                                                         | 0.00450 | -1.24 | Normal down vs Off IS Tolerant |
| 201098_PM_at   | COPB2    | coatamer protein complex, subunit beta 2 (beta prime)                       | 0.00451 | -1.60 | Normal down vs Off IS Tolerant |
| 215518_PM_at   | STXBPSL  | syntaxin binding protein 5-like                                             | 0.00451 | -1.28 | Normal down vs Off IS Tolerant |
| 203729_PM_at   | EMP3     | epithelial membrane protein 3                                               | 0.00451 | -1.31 | Normal down vs Off IS Tolerant |

|                 |                                                                                                                           |                                                                                               |         |       |                                |
|-----------------|---------------------------------------------------------------------------------------------------------------------------|-----------------------------------------------------------------------------------------------|---------|-------|--------------------------------|
| 211639_PM_x_at  | IGHA1 /// IGHA2 ///<br>IGHD /// IGHG1 ///<br>IGHG3 /// IGHG4<br>///IGHM /// IGHV4-<br>31 /// IGHV4-59 ///<br>LOC100126583 | immunoglobulin heavy constant alpha 1<br>/// immunoglobulin heavy constant<br>alpha 2 (A2m ma | 0.00452 | -1.69 | Normal down vs Off IS Tolerant |
| 1569971_PM_at   | LOC100288721                                                                                                              | hypothetical LOC100288721                                                                     | 0.00452 | -1.65 | Normal down vs Off IS Tolerant |
| 223670_PM_s_at  | HEMGN                                                                                                                     | hemogen                                                                                       | 0.00452 | 2.76  | Normal up vs Off IS Tolerant   |
| 202016_PM_at    | MEST                                                                                                                      | mesoderm specific transcript homolog<br>(mouse)                                               | 0.00452 | 1.55  | Normal up vs Off IS Tolerant   |
| 202646_PM_s_at  | CSDE1                                                                                                                     | cold shock domain containing E1, RNA-<br>binding                                              | 0.00452 | -1.18 | Normal down vs Off IS Tolerant |
| 1555613_PM_a_at | ZAP70                                                                                                                     | zeta-chain (TCR) associated protein<br>kinase 70kDa                                           | 0.00452 | 1.74  | Normal up vs Off IS Tolerant   |
| 212618_PM_at    | ZNF609                                                                                                                    | zinc finger protein 609                                                                       | 0.00452 | 1.34  | Normal up vs Off IS Tolerant   |
| 1560322_PM_at   | RBMS3                                                                                                                     | RNA binding motif, single stranded<br>interacting protein 3                                   | 0.00452 | -1.60 | Normal down vs Off IS Tolerant |
| 225911_PM_at    | NPNT                                                                                                                      | nephronectin                                                                                  | 0.00453 | -1.32 | Normal down vs Off IS Tolerant |
| 213957_PM_s_at  | CEP350                                                                                                                    | centrosomal protein 350kDa                                                                    | 0.00453 | -1.35 | Normal down vs Off IS Tolerant |
| 226465_PM_s_at  | SON                                                                                                                       | SON DNA binding protein                                                                       | 0.00454 | 1.15  | Normal up vs Off IS Tolerant   |
| 204067_PM_at    | SUOX                                                                                                                      | sulfite oxidase                                                                               | 0.00454 | -1.42 | Normal down vs Off IS Tolerant |
| 242434_PM_at    | ---                                                                                                                       | ---                                                                                           | 0.00454 | 1.27  | Normal up vs Off IS Tolerant   |
| 240306_PM_at    | ---                                                                                                                       | ---                                                                                           | 0.00454 | -1.29 | Normal down vs Off IS Tolerant |
| 226916_PM_x_at  | DPP9                                                                                                                      | dipeptidyl-peptidase 9                                                                        | 0.00454 | 1.30  | Normal up vs Off IS Tolerant   |
| 1558672_PM_at   | ---                                                                                                                       | ---                                                                                           | 0.00455 | -1.64 | Normal down vs Off IS Tolerant |
| 223703_PM_at    | C10orf11                                                                                                                  | chromosome 10 open reading frame 11                                                           | 0.00455 | -1.59 | Normal down vs Off IS Tolerant |

|                 |           |                                                                           |         |       |                                |
|-----------------|-----------|---------------------------------------------------------------------------|---------|-------|--------------------------------|
| 236101_PM_at    | ---       | ---                                                                       | 0.00456 | -1.40 | Normal down vs Off IS Tolerant |
| 225215_PM_s_at  | MTRF1L    | mitochondrial translational release factor 1-like                         | 0.00457 | 1.29  | Normal up vs Off IS Tolerant   |
| 242646_PM_at    | ---       | ---                                                                       | 0.00457 | 1.67  | Normal up vs Off IS Tolerant   |
| 216095_PM_x_at  | MTMR1     | myotubularin related protein 1                                            | 0.00458 | 1.20  | Normal up vs Off IS Tolerant   |
| 236126_PM_at    | ACVR2B    | activin A receptor, type IIB                                              | 0.00458 | 1.45  | Normal up vs Off IS Tolerant   |
| 218561_PM_s_at  | LYRM4     | LYR motif containing 4                                                    | 0.00458 | 1.51  | Normal up vs Off IS Tolerant   |
| 225147_PM_at    | CYTH3     | cytohesin 3                                                               | 0.00458 | 1.57  | Normal up vs Off IS Tolerant   |
| 244187_PM_at    | APOOL     | Apolipoprotein O-like                                                     | 0.00458 | -1.39 | Normal down vs Off IS Tolerant |
| 229025_PM_s_at  | IMMP1L    | IMP1 inner mitochondrial membrane peptidase-like ( <i>S. cerevisiae</i> ) | 0.00459 | 1.47  | Normal up vs Off IS Tolerant   |
| 229097_PM_at    | DIAPH3    | diaphanous homolog 3 ( <i>Drosophila</i> )                                | 0.00459 | -1.26 | Normal down vs Off IS Tolerant |
| 207590_PM_s_at  | CENPI     | centromere protein I                                                      | 0.00459 | -1.29 | Normal down vs Off IS Tolerant |
| 1563068_PM_at   | ---       | ---                                                                       | 0.00459 | -1.19 | Normal down vs Off IS Tolerant |
| 239848_PM_at    | ---       | ---                                                                       | 0.00459 | 1.56  | Normal up vs Off IS Tolerant   |
| 1561894_PM_at   | LOC653739 | hypothetical LOC653739                                                    | 0.00459 | -1.92 | Normal down vs Off IS Tolerant |
| 238220_PM_at    | KDM6A     | lysine (K)-specific demethylase 6A                                        | 0.00460 | 1.78  | Normal up vs Off IS Tolerant   |
| 244726_PM_at    | ---       | ---                                                                       | 0.00460 | -1.64 | Normal down vs Off IS Tolerant |
| 1569917_PM_at   | ---       | ---                                                                       | 0.00460 | -1.34 | Normal down vs Off IS Tolerant |
| 239660_PM_at    | RALGAPA2  | Ral GTPase activating protein, alpha subunit 2 (catalytic)                | 0.00460 | 1.46  | Normal up vs Off IS Tolerant   |
| 179_PM_at       | PMS2P11   | postmeiotic segregation increased 2 pseudogene 11                         | 0.00460 | 1.20  | Normal up vs Off IS Tolerant   |
| 1560977_PM_a_at | BCL2L13   | BCL2-like 13 (apoptosis facilitator)                                      | 0.00461 | -1.60 | Normal down vs Off IS Tolerant |
| 200714_PM_x_at  | OS9       | osteosarcoma amplified 9, endoplasmic reticulum lectin                    | 0.00462 | -1.19 | Normal down vs Off IS Tolerant |

|                 |           |                                                                                         |         |       |                                |
|-----------------|-----------|-----------------------------------------------------------------------------------------|---------|-------|--------------------------------|
| 225602_PM_at    | GLIPR2    | GLI pathogenesis-related 2                                                              | 0.00462 | -1.27 | Normal down vs Off IS Tolerant |
| 242403_PM_at    | ---       | ---                                                                                     | 0.00462 | 1.49  | Normal up vs Off IS Tolerant   |
| 232309_PM_at    | LOC202181 | hypothetical LOC202181                                                                  | 0.00462 | 1.49  | Normal up vs Off IS Tolerant   |
| 222392_PM_x_at  | PERP      | PERP, TP53 apoptosis effector                                                           | 0.00462 | 1.45  | Normal up vs Off IS Tolerant   |
| 226915_PM_s_at  | ARPC5L    | actin related protein 2/3 complex, subunit 5-like                                       | 0.00462 | 1.29  | Normal up vs Off IS Tolerant   |
| 211945_PM_s_at  | ITGB1     | integrin, beta 1 (fibronectin receptor, beta polypeptide, antigen CD29 includes MDF2, M | 0.00462 | 1.23  | Normal up vs Off IS Tolerant   |
| 220877_PM_at    | ---       | ---                                                                                     | 0.00462 | -1.58 | Normal down vs Off IS Tolerant |
| 235615_PM_at    | PGGT1B    | protein geranylgeranyltransferase type I, beta subunit                                  | 0.00463 | 1.72  | Normal up vs Off IS Tolerant   |
| 243134_PM_at    | ---       | ---                                                                                     | 0.00463 | 1.80  | Normal up vs Off IS Tolerant   |
| 1554006_PM_a_at | LLGL2     | lethal giant larvae homolog 2 (Drosophila)                                              | 0.00463 | 1.37  | Normal up vs Off IS Tolerant   |
| 218157_PM_x_at  | CDC42SE1  | CDC42 small effector 1                                                                  | 0.00463 | 1.21  | Normal up vs Off IS Tolerant   |
| 226937_PM_at    | CRLS1     | Cardiolipin synthase 1                                                                  | 0.00463 | -1.35 | Normal down vs Off IS Tolerant |
| 1562896_PM_at   | TNRC18    | trinucleotide repeat containing 18                                                      | 0.00463 | -1.29 | Normal down vs Off IS Tolerant |
| 241099_PM_at    | ---       | ---                                                                                     | 0.00464 | -1.32 | Normal down vs Off IS Tolerant |
| 216059_PM_at    | PAX3      | paired box 3                                                                            | 0.00464 | -1.22 | Normal down vs Off IS Tolerant |
| 1558660_PM_at   | ---       | ---                                                                                     | 0.00464 | -1.30 | Normal down vs Off IS Tolerant |
| 210013_PM_at    | HPX       | hemopexin                                                                               | 0.00464 | -1.40 | Normal down vs Off IS Tolerant |
| 1553917_PM_at   | PIKFYVE   | phosphoinositide kinase, FYVE finger containing                                         | 0.00465 | -1.37 | Normal down vs Off IS Tolerant |
| 222198_PM_at    | ---       | ---                                                                                     | 0.00466 | -1.20 | Normal down vs Off IS Tolerant |



|                 |          |                                                       |         |       |                                |
|-----------------|----------|-------------------------------------------------------|---------|-------|--------------------------------|
| 206714_PM_at    | ALOX15B  | arachidonate 15-lipoxygenase, type B                  | 0.00466 | -1.19 | Normal down vs Off IS Tolerant |
| 1561219_PM_x_at | ---      | ---                                                   | 0.00466 | -1.25 | Normal down vs Off IS Tolerant |
| 1570630_PM_at   | ---      | ---                                                   | 0.00467 | -1.21 | Normal down vs Off IS Tolerant |
| 243163_PM_at    | ---      | ---                                                   | 0.00467 | -1.19 | Normal down vs Off IS Tolerant |
| 1554261_PM_at   | KLHL29   | kelch-like 29 (Drosophila)                            | 0.00467 | -1.24 | Normal down vs Off IS Tolerant |
| 1558066_PM_s_at | TBC1D16  | TBC1 domain family, member 16                         | 0.00467 | -1.23 | Normal down vs Off IS Tolerant |
| 239467_PM_at    | ---      | ---                                                   | 0.00467 | 1.51  | Normal up vs Off IS Tolerant   |
| 212836_PM_at    | POLD3    | polymerase (DNA-directed), delta 3, accessory subunit | 0.00468 | -1.42 | Normal down vs Off IS Tolerant |
| 240877_PM_x_at  | ---      | ---                                                   | 0.00468 | -1.30 | Normal down vs Off IS Tolerant |
| 218384_PM_at    | CARHSP1  | calcium regulated heat stable protein 1, 24kDa        | 0.00468 | -1.41 | Normal down vs Off IS Tolerant |
| 219149_PM_x_at  | DBR1     | debranching enzyme homolog 1 (S. cerevisiae)          | 0.00468 | 1.48  | Normal up vs Off IS Tolerant   |
| 214086_PM_s_at  | PARP2    | poly (ADP-ribose) polymerase 2                        | 0.00468 | 1.38  | Normal up vs Off IS Tolerant   |
| 230466_PM_s_at  | ---      | ---                                                   | 0.00469 | -1.46 | Normal down vs Off IS Tolerant |
| 236798_PM_at    | ---      | ---                                                   | 0.00469 | 1.55  | Normal up vs Off IS Tolerant   |
| 213340_PM_s_at  | KIAA0495 | KIAA0495                                              | 0.00470 | 1.29  | Normal up vs Off IS Tolerant   |
| 203386_PM_at    | TBC1D4   | TBC1 domain family, member 4                          | 0.00471 | 1.74  | Normal up vs Off IS Tolerant   |
| 229975_PM_at    | BMPR1B   | bone morphogenetic protein receptor, type IB          | 0.00471 | -1.76 | Normal down vs Off IS Tolerant |
| 228708_PM_at    | RAB27B   | RAB27B, member RAS oncogene family                    | 0.00471 | 1.69  | Normal up vs Off IS Tolerant   |
| 231736_PM_x_at  | MGST1    | microsomal glutathione S-transferase 1                | 0.00471 | -1.71 | Normal down vs Off IS Tolerant |
| 202130_PM_at    | RIOK3    | RIO kinase 3 (yeast)                                  | 0.00471 | 1.36  | Normal up vs Off IS Tolerant   |
| 244676_PM_s_at  | MTUS2    | microtubule associated tumor suppressor candidate 2   | 0.00472 | -1.19 | Normal down vs Off IS Tolerant |

|                |          |                                                                   |         |       |                                |
|----------------|----------|-------------------------------------------------------------------|---------|-------|--------------------------------|
| 239615_PM_at   | ---      | ---                                                               | 0.00472 | 1.31  | Normal up vs Off IS Tolerant   |
| 224903_PM_at   | CIRH1A   | cirrhosis, autosomal recessive 1A (cirhin)                        | 0.00472 | 1.29  | Normal up vs Off IS Tolerant   |
| 205627_PM_at   | CDA      | cytidine deaminase                                                | 0.00473 | -1.89 | Normal down vs Off IS Tolerant |
| 212410_PM_at   | EFHA1    | EF-hand domain family, member A1                                  | 0.00473 | 1.24  | Normal up vs Off IS Tolerant   |
| 216180_PM_s_at | SYNJ2    | synaptojanin 2                                                    | 0.00473 | 1.43  | Normal up vs Off IS Tolerant   |
| 1555920_PM_at  | CBX3     | Chromobox homolog 3 (HP1 gamma homolog, Drosophila)               | 0.00474 | 1.40  | Normal up vs Off IS Tolerant   |
| 228345_PM_at   | CHIC1    | cysteine-rich hydrophobic domain 1                                | 0.00474 | 1.54  | Normal up vs Off IS Tolerant   |
| 223008_PM_s_at | C9orf5   | chromosome 9 open reading frame 5                                 | 0.00474 | 1.40  | Normal up vs Off IS Tolerant   |
| 240440_PM_at   | NPL      | N-acetylneuraminate pyruvate lyase (dihydrodipicolinate synthase) | 0.00474 | -1.64 | Normal down vs Off IS Tolerant |
| 213024_PM_at   | TMF1     | TATA element modulatory factor 1                                  | 0.00474 | 1.69  | Normal up vs Off IS Tolerant   |
| 218076_PM_s_at | ARHGAP17 | Rho GTPase activating protein 17                                  | 0.00474 | -1.27 | Normal down vs Off IS Tolerant |
| 235686_PM_at   | C2orf60  | chromosome 2 open reading frame 60                                | 0.00475 | 1.40  | Normal up vs Off IS Tolerant   |
| 237097_PM_at   | ---      | ---                                                               | 0.00475 | 1.50  | Normal up vs Off IS Tolerant   |
| 228771_PM_at   | ADRBK2   | adrenergic, beta, receptor kinase 2                               | 0.00475 | -1.52 | Normal down vs Off IS Tolerant |
| 216550_PM_x_at | ANKRD12  | ankyrin repeat domain 12                                          | 0.00475 | 1.31  | Normal up vs Off IS Tolerant   |
| 213143_PM_at   | C2orf72  | chromosome 2 open reading frame 72                                | 0.00476 | -1.30 | Normal down vs Off IS Tolerant |
| 242923_PM_at   | ZNF678   | zinc finger protein 678                                           | 0.00476 | -1.60 | Normal down vs Off IS Tolerant |
| 207578_PM_s_at | HTR4     | 5-hydroxytryptamine (serotonin) receptor 4                        | 0.00476 | -1.30 | Normal down vs Off IS Tolerant |
| 235033_PM_at   | NPEPL1   | Aminopeptidase-like 1                                             | 0.00476 | 1.39  | Normal up vs Off IS Tolerant   |
| 201266_PM_at   | TXNRD1   | thioredoxin reductase 1                                           | 0.00477 | -1.33 | Normal down vs Off IS Tolerant |
| 235289_PM_at   | EIF5A2   | eukaryotic translation initiation factor 5A2                      | 0.00477 | 1.40  | Normal up vs Off IS Tolerant   |
| AFFX-BioC-5_at | ---      | ---                                                               | 0.00477 | -1.89 | Normal down vs Off IS Tolerant |
| 223161_PM_at   | KIAA1147 | KIAA1147                                                          | 0.00478 | 1.48  | Normal up vs Off IS Tolerant   |

|                 |                       |                                                                           |         |       |                                |
|-----------------|-----------------------|---------------------------------------------------------------------------|---------|-------|--------------------------------|
| 218331_PM_s_at  | C10orf18              | chromosome 10 open reading frame 18                                       | 0.00478 | 1.41  | Normal up vs Off IS Tolerant   |
| 208933_PM_s_at  | LGALS8                | lectin, galactoside-binding, soluble, 8                                   | 0.00478 | 1.20  | Normal up vs Off IS Tolerant   |
| 1554380_PM_at   | NEK11                 | NIMA (never in mitosis gene a)- related kinase 11                         | 0.00478 | -1.33 | Normal down vs Off IS Tolerant |
| 235009_PM_at    | BOD1L                 | biorientation of chromosomes in cell division 1-like                      | 0.00479 | -1.36 | Normal down vs Off IS Tolerant |
| 239580_PM_at    | GUCY1A3               | guanylate cyclase 1, soluble, alpha 3                                     | 0.00479 | -1.49 | Normal down vs Off IS Tolerant |
| 202245_PM_at    | LSS                   | lanosterol synthase (2,3-oxidosqualene-lanosterol cyclase)                | 0.00480 | 1.29  | Normal up vs Off IS Tolerant   |
| 217384_PM_x_at  | IGHV3-48 /// IGKV3-20 | Immunoglobulin heavy variable 3-48 /// Immunoglobulin kappa variable 3-20 | 0.00480 | -1.28 | Normal down vs Off IS Tolerant |
| 226806_PM_s_at  | NFIA                  | nuclear factor I/A                                                        | 0.00480 | 1.33  | Normal up vs Off IS Tolerant   |
| 209555_PM_s_at  | CD36                  | CD36 molecule (thrombospondin receptor)                                   | 0.00481 | -1.73 | Normal down vs Off IS Tolerant |
| 217610_PM_at    | ---                   | ---                                                                       | 0.00481 | 1.67  | Normal up vs Off IS Tolerant   |
| 211166_PM_at    | FAM153A               | family with sequence similarity 153, member A                             | 0.00481 | -1.36 | Normal down vs Off IS Tolerant |
| 1552800_PM_at   | ABHD11                | abhydrolase domain containing 11                                          | 0.00482 | -1.38 | Normal down vs Off IS Tolerant |
| 213313_PM_at    | RABGAP1               | RAB GTPase activating protein 1                                           | 0.00482 | -1.25 | Normal down vs Off IS Tolerant |
| 216623_PM_x_at  | TOX3                  | TOX high mobility group box family member 3                               | 0.00483 | -1.28 | Normal down vs Off IS Tolerant |
| 1554195_PM_a_at | C5orf46               | chromosome 5 open reading frame 46                                        | 0.00483 | -1.26 | Normal down vs Off IS Tolerant |
| 225752_PM_at    | NIPA1                 | non imprinted in Prader-Willi/Angelman syndrome 1                         | 0.00483 | 1.38  | Normal up vs Off IS Tolerant   |
| 210310_PM_s_at  | FGF5                  | fibroblast growth factor 5                                                | 0.00483 | -1.22 | Normal down vs Off IS Tolerant |
| 1558518_PM_at   | TAB3                  | TGF-beta activated kinase 1/MAP3K7 binding protein 3                      | 0.00483 | 1.29  | Normal up vs Off IS Tolerant   |

|                 |                        |                                                                   |         |       |                                |
|-----------------|------------------------|-------------------------------------------------------------------|---------|-------|--------------------------------|
| 208932_PM_at    | PPP4C                  | protein phosphatase 4, catalytic subunit                          | 0.00483 | -1.42 | Normal down vs Off IS Tolerant |
| 221984_PM_s_at  | FAM134A                | family with sequence similarity 134, member A                     | 0.00484 | 1.34  | Normal up vs Off IS Tolerant   |
| 221158_PM_at    | GCFC1                  | GC-rich sequence DNA-binding factor 1                             | 0.00485 | 1.63  | Normal up vs Off IS Tolerant   |
| 202949_PM_s_at  | FHL2                   | four and a half LIM domains 2                                     | 0.00485 | 1.56  | Normal up vs Off IS Tolerant   |
| 223388_PM_s_at  | ZFYVE1                 | zinc finger, FYVE domain containing 1                             | 0.00485 | 1.26  | Normal up vs Off IS Tolerant   |
| 1569796_PM_s_at | ATRNL1                 | attractin-like 1                                                  | 0.00485 | -1.58 | Normal down vs Off IS Tolerant |
| 238561_PM_s_at  | UTP23                  | UTP23, small subunit (SSU) processome component, homolog (yeast)  | 0.00485 | 1.30  | Normal up vs Off IS Tolerant   |
| 203755_PM_at    | BUB1B                  | budding uninhibited by benzimidazoles 1 homolog beta (yeast)      | 0.00485 | -1.35 | Normal down vs Off IS Tolerant |
| 222913_PM_at    | KLF3                   | Kruppel-like factor 3 (basic)                                     | 0.00485 | 1.26  | Normal up vs Off IS Tolerant   |
| 221619_PM_s_at  | MTCH1                  | mitochondrial carrier homolog 1 (C. elegans)                      | 0.00486 | 1.21  | Normal up vs Off IS Tolerant   |
| 1553768_PM_a_at | DCBLD1                 | discoidin, CUB and LCCL domain containing 1                       | 0.00486 | -1.29 | Normal down vs Off IS Tolerant |
| 221789_PM_x_at  | RHOT2                  | ras homolog gene family, member T2                                | 0.00486 | 1.26  | Normal up vs Off IS Tolerant   |
| 242473_PM_at    | TRAF4                  | TNF receptor-associated factor 4                                  | 0.00486 | 1.49  | Normal up vs Off IS Tolerant   |
| 228497_PM_at    | SLC22A15               | solute carrier family 22, member 15                               | 0.00486 | -1.69 | Normal down vs Off IS Tolerant |
| 38487_PM_at     | STAB1                  | stabilin 1                                                        | 0.00487 | -1.62 | Normal down vs Off IS Tolerant |
| 228743_PM_at    | TXNDC17                | thioredoxin domain containing 17                                  | 0.00487 | -1.28 | Normal down vs Off IS Tolerant |
| 243957_PM_at    | LOC400464              | hypothetical LOC400464                                            | 0.00487 | 1.40  | Normal up vs Off IS Tolerant   |
| 223367_PM_at    | DNAJC30                | DnaJ (Hsp40) homolog, subfamily C, member 30                      | 0.00487 | 1.40  | Normal up vs Off IS Tolerant   |
| 1568763_PM_s_at | LOC728613 ///<br>PDCD6 | programmed cell death 6 pseudogene ///<br>programmed cell death 6 | 0.00488 | 1.46  | Normal up vs Off IS Tolerant   |

|                 |         |                                                                                |         |       |                                |
|-----------------|---------|--------------------------------------------------------------------------------|---------|-------|--------------------------------|
| 214406_PM_s_at  | SLC7A4  | solute carrier family 7 (cationic amino acid transporter, y+ system), member 4 | 0.00488 | -1.20 | Normal down vs Off IS Tolerant |
| 239252_PM_at    | COX7B   | cytochrome c oxidase subunit VIIb                                              | 0.00488 | 1.57  | Normal up vs Off IS Tolerant   |
| 1566177_PM_at   | ---     | ---                                                                            | 0.00488 | -1.37 | Normal down vs Off IS Tolerant |
| 205697_PM_at    | SCGN    | secretagogen, EF-hand calcium binding protein                                  | 0.00488 | -1.23 | Normal down vs Off IS Tolerant |
| 201371_PM_s_at  | CUL3    | cullin 3                                                                       | 0.00488 | 1.19  | Normal up vs Off IS Tolerant   |
| 1556075_PM_at   | ---     | ---                                                                            | 0.00488 | -1.19 | Normal down vs Off IS Tolerant |
| 226867_PM_at    | DENND4C | DENN/MADD domain containing 4C                                                 | 0.00489 | 1.39  | Normal up vs Off IS Tolerant   |
| 1554580_PM_a_at | WWP2    | WW domain containing E3 ubiquitin protein ligase 2                             | 0.00489 | -1.46 | Normal down vs Off IS Tolerant |
| 212477_PM_at    | ACAP2   | ArfGAP with coiled-coil, ankyrin repeat and PH domains 2                       | 0.00489 | -1.26 | Normal down vs Off IS Tolerant |
| 229123_PM_at    | ---     | ---                                                                            | 0.00489 | 1.62  | Normal up vs Off IS Tolerant   |
| 218562_PM_s_at  | TMEM57  | transmembrane protein 57                                                       | 0.00489 | 1.50  | Normal up vs Off IS Tolerant   |
| 223635_PM_s_at  | SSBP3   | single stranded DNA binding protein 3                                          | 0.00490 | 1.29  | Normal up vs Off IS Tolerant   |
| 1569660_PM_at   | PP13439 | hypothetical LOC100128046                                                      | 0.00490 | -1.23 | Normal down vs Off IS Tolerant |
| 210252_PM_s_at  | MADD    | MAP-kinase activating death domain                                             | 0.00490 | 1.20  | Normal up vs Off IS Tolerant   |
| 240289_PM_at    | PDLIM3  | PDZ and LIM domain 3                                                           | 0.00491 | -1.36 | Normal down vs Off IS Tolerant |
| 212988_PM_x_at  | ACTG1   | actin, gamma 1                                                                 | 0.00491 | -1.11 | Normal down vs Off IS Tolerant |
| 205407_PM_at    | RECK    | reversion-inducing-cysteine-rich protein with kazal motifs                     | 0.00491 | 1.54  | Normal up vs Off IS Tolerant   |
| 234041_PM_at    | ---     | ---                                                                            | 0.00492 | 1.55  | Normal up vs Off IS Tolerant   |
| 213878_PM_at    | PYROXD1 | pyridine nucleotide-disulphide oxidoreductase domain 1                         | 0.00492 | 1.35  | Normal up vs Off IS Tolerant   |
| 214049_PM_x_at  | CD7     | CD7 molecule                                                                   | 0.00493 | 1.32  | Normal up vs Off IS Tolerant   |
| 216490_PM_x_at  | ---     | ---                                                                            | 0.00493 | 1.21  | Normal up vs Off IS Tolerant   |
| 212068_PM_s_at  | BAT2L1  | HLA-B associated transcript 2-like 1                                           | 0.00493 | 1.33  | Normal up vs Off IS Tolerant   |

|                      |          |                                                                       |         |       |                                |
|----------------------|----------|-----------------------------------------------------------------------|---------|-------|--------------------------------|
| AFFX-r2-Ec-bioB-3_at | ---      | ---                                                                   | 0.00493 | -1.88 | Normal down vs Off IS Tolerant |
| 211448_PM_s_at       | RGS6     | regulator of G-protein signaling 6                                    | 0.00493 | -1.32 | Normal down vs Off IS Tolerant |
| 1561882_PM_at        | SYTL3    | synaptotagmin-like 3                                                  | 0.00495 | 1.85  | Normal up vs Off IS Tolerant   |
| 226158_PM_at         | KLHL24   | kelch-like 24 (Drosophila)                                            | 0.00495 | 1.50  | Normal up vs Off IS Tolerant   |
| 211000_PM_s_at       | IL6ST    | interleukin 6 signal transducer (gp130, oncostatin M receptor)        | 0.00495 | 1.79  | Normal up vs Off IS Tolerant   |
| 1558342_PM_x_at      | DIXDC1   | DIX domain containing 1                                               | 0.00495 | -1.27 | Normal down vs Off IS Tolerant |
| 220920_PM_at         | ATP10B   | ATPase, class V, type 10B                                             | 0.00495 | -1.53 | Normal down vs Off IS Tolerant |
| 217508_PM_s_at       | C18orf25 | chromosome 18 open reading frame 25                                   | 0.00495 | 1.36  | Normal up vs Off IS Tolerant   |
| 1552568_PM_at        | RTP3     | receptor (chemosensory) transporter protein 3                         | 0.00496 | -1.24 | Normal down vs Off IS Tolerant |
| 220525_PM_s_at       | AUP1     | ancient ubiquitous protein 1                                          | 0.00496 | 1.20  | Normal up vs Off IS Tolerant   |
| 222431_PM_at         | SPIN1    | spindlin 1                                                            | 0.00496 | 1.25  | Normal up vs Off IS Tolerant   |
| 1559190_PM_s_at      | RDH13    | retinol dehydrogenase 13 (all-trans/9-cis)                            | 0.00496 | 1.58  | Normal up vs Off IS Tolerant   |
| 205345_PM_at         | BARD1    | BRCA1 associated RING domain 1                                        | 0.00496 | -1.37 | Normal down vs Off IS Tolerant |
| 219560_PM_at         | C22orf29 | chromosome 22 open reading frame 29                                   | 0.00496 | 1.19  | Normal up vs Off IS Tolerant   |
| 233501_PM_at         | ---      | ---                                                                   | 0.00496 | -1.24 | Normal down vs Off IS Tolerant |
| 1554670_PM_at        | GGA1     | golgi-associated, gamma adaptin ear containing, ARF binding protein 1 | 0.00497 | 2.06  | Normal up vs Off IS Tolerant   |
| 242711_PM_x_at       | FANCM    | Fanconi anemia, complementation group M                               | 0.00497 | 1.36  | Normal up vs Off IS Tolerant   |
| 1565848_PM_at        | ZNF428   | zinc finger protein 428                                               | 0.00497 | -1.32 | Normal down vs Off IS Tolerant |
| 202585_PM_s_at       | NFX1     | nuclear transcription factor, X-box binding 1                         | 0.00497 | 1.49  | Normal up vs Off IS Tolerant   |

|                |         |                                               |         |       |                                |
|----------------|---------|-----------------------------------------------|---------|-------|--------------------------------|
| 234773_PM_x_at | ---     | ---                                           | 0.00498 | -2.03 | Normal down vs Off IS Tolerant |
| 1554050_PM_at  | SMPDL3B | sphingomyelin phosphodiesterase, acid-like 3B | 0.00498 | -1.22 | Normal down vs Off IS Tolerant |
| 238472_PM_at   | FBXO9   | F-box protein 9                               | 0.00498 | 1.79  | Normal up vs Off IS Tolerant   |
| 221660_PM_at   | MYL10   | myosin, light chain 10, regulatory            | 0.00498 | -1.79 | Normal down vs Off IS Tolerant |
| 211548_PM_s_at | HPGD    | hydroxyprostaglandin dehydrogenase 15-(NAD)   | 0.00498 | 1.55  | Normal up vs Off IS Tolerant   |
| 1570052_PM_at  | MIPOL1  | mirror-image polydactyly 1                    | 0.00499 | -1.54 | Normal down vs Off IS Tolerant |
| 212325_PM_at   | LIMCH1  | LIM and calponin homology domains 1           | 0.00499 | -1.34 | Normal down vs Off IS Tolerant |
| 221751_PM_at   | PANK3   | pantothenate kinase 3                         | 0.00499 | 1.18  | Normal up vs Off IS Tolerant   |
| 242605_PM_at   | ---     | ---                                           | 0.00500 | -1.59 | Normal down vs Off IS Tolerant |
| 238468_PM_at   | TNRC6B  | trinucleotide repeat containing 6B            | 0.00500 | 1.35  | Normal up vs Off IS Tolerant   |

**Supplementary Table S6: 4529 Healthy Controls vs Tolerant Unique Genes (2nd 2 Years off IS)**

| Probeset ID     | Gene Symbol | Gene Title                                                              | p-value<br>(Normal vs.<br>> 5 Years Off<br>IS Tolerant) | Fold-Change<br>(Normal vs. ><br>5 Years Off IS<br>Tolerant) | Fold-Change (Normal vs. > 5 Years Off IS<br>Tolerant) (Description) |
|-----------------|-------------|-------------------------------------------------------------------------|---------------------------------------------------------|-------------------------------------------------------------|---------------------------------------------------------------------|
| 229312_PM_s_at  | GKAP1       | G kinase anchoring protein 1                                            | 4.84E-11                                                | 2.41                                                        | Normal up vs > 5 Years Off IS Tolerant                              |
| 219623_PM_at    | ACTR5       | ARP5 actin-related protein 5 homolog (yeast)                            | 5.82E-10                                                | 1.93                                                        | Normal up vs > 5 Years Off IS Tolerant                              |
| 242904_PM_x_at  | ---         | ---                                                                     | 1.06E-09                                                | 4.73                                                        | Normal up vs > 5 Years Off IS Tolerant                              |
| 217902_PM_s_at  | HERC2       | hect domain and RLD 2                                                   | 1.89E-09                                                | 2.72                                                        | Normal up vs > 5 Years Off IS Tolerant                              |
| 223135_PM_s_at  | BBX         | bobby sox homolog (Drosophila)                                          | 2.00E-09                                                | 1.69                                                        | Normal up vs > 5 Years Off IS Tolerant                              |
| 207000_PM_s_at  | PPP3CC      | protein phosphatase 3, catalytic subunit, gamma isozyme                 | 3.66E-09                                                | 2.30                                                        | Normal up vs > 5 Years Off IS Tolerant                              |
| 219147_PM_s_at  | C9orf95     | chromosome 9 open reading frame 95                                      | 4.27E-09                                                | 3.63                                                        | Normal up vs > 5 Years Off IS Tolerant                              |
| 208313_PM_s_at  | SF1         | splicing factor 1                                                       | 5.13E-09                                                | 1.59                                                        | Normal up vs > 5 Years Off IS Tolerant                              |
| 213036_PM_x_at  | ATP2A3      | ATPase, Ca++ transporting, ubiquitous                                   | 6.84E-09                                                | 2.25                                                        | Normal up vs > 5 Years Off IS Tolerant                              |
| 1568870_PM_at   | SLC24A4     | solute carrier family 24 (sodium/potassium/calcium exchanger), member 4 | 7.61E-09                                                | -2.66                                                       | Normal down vs > 5 Years Off IS Tolerant                            |
| 202501_PM_at    | MAPRE2      | microtubule-associated protein, RP/EB family, member 2                  | 1.05E-08                                                | 1.73                                                        | Normal up vs > 5 Years Off IS Tolerant                              |
| 212413_PM_at    | 6-Sep       | septin 6                                                                | 1.39E-08                                                | 3.08                                                        | Normal up vs > 5 Years Off IS Tolerant                              |
| 221757_PM_at    | PIK3IP1     | phosphoinositide-3-kinase interacting protein 1                         | 1.58E-08                                                | 3.62                                                        | Normal up vs > 5 Years Off IS Tolerant                              |
| 200672_PM_x_at  | SPTBN1      | spectrin, beta, non-erythrocytic 1                                      | 1.70E-08                                                | 2.72                                                        | Normal up vs > 5 Years Off IS Tolerant                              |
| 211919_PM_s_at  | CXCR4       | chemokine (C-X-C motif) receptor 4                                      | 2.08E-08                                                | 2.74                                                        | Normal up vs > 5 Years Off IS Tolerant                              |
| 1560404_PM_a_at | ATPBD4      | ATP binding domain 4                                                    | 2.50E-08                                                | -2.63                                                       | Normal down vs > 5 Years Off IS Tolerant                            |
| 211202_PM_s_at  | KDM5B       | lysine (K)-specific demethylase 5B                                      | 2.51E-08                                                | 1.91                                                        | Normal up vs > 5 Years Off IS Tolerant                              |



|                |                                 |                                                                                        |          |       |                                          |
|----------------|---------------------------------|----------------------------------------------------------------------------------------|----------|-------|------------------------------------------|
| 212066_PM_s_at | USP34                           | ubiquitin specific peptidase 34                                                        | 2.69E-08 | 1.41  | Normal up vs > 5 Years Off IS Tolerant   |
| 213434_PM_at   | STX2                            | syntaxin 2                                                                             | 2.87E-08 | 2.66  | Normal up vs > 5 Years Off IS Tolerant   |
| 203579_PM_s_at | SLC7A6                          | solute carrier family 7 (cationic amino acid transporter, y+ system), member 6         | 3.07E-08 | 3.22  | Normal up vs > 5 Years Off IS Tolerant   |
| 225982_PM_at   | UBTF                            | upstream binding transcription factor, RNA polymerase I                                | 3.23E-08 | 1.76  | Normal up vs > 5 Years Off IS Tolerant   |
| 229844_PM_at   | FOXP1                           | forkhead box P1                                                                        | 3.95E-08 | 2.31  | Normal up vs > 5 Years Off IS Tolerant   |
| 212414_PM_s_at | GLYR1 /// SEPT6                 | glyoxylate reductase 1 homolog (Arabidopsis) /// septin 6                              | 4.85E-08 | 2.52  | Normal up vs > 5 Years Off IS Tolerant   |
| 213106_PM_at   | ATP8A1                          | ATPase, aminophospholipid transporter (APLT), class I, type 8A, member 1               | 5.07E-08 | 2.28  | Normal up vs > 5 Years Off IS Tolerant   |
| 226051_PM_at   | SELM                            | selenoprotein M                                                                        | 5.76E-08 | 3.09  | Normal up vs > 5 Years Off IS Tolerant   |
| 225326_PM_at   | RBM27                           | RNA binding motif protein 27                                                           | 6.07E-08 | 2.02  | Normal up vs > 5 Years Off IS Tolerant   |
| 226134_PM_s_at | ---                             | ---                                                                                    | 6.27E-08 | 2.73  | Normal up vs > 5 Years Off IS Tolerant   |
| 209201_PM_x_at | CXCR4                           | chemokine (C-X-C motif) receptor 4                                                     | 7.01E-08 | 2.67  | Normal up vs > 5 Years Off IS Tolerant   |
| 210279_PM_at   | GPR18                           | G protein-coupled receptor 18                                                          | 8.94E-08 | 4.05  | Normal up vs > 5 Years Off IS Tolerant   |
| 207912_PM_s_at | DAZ1 /// DAZ2 /// DAZ3 /// DAZ4 | deleted in azoospermia 1 /// deleted in azoospermia 2 /// deleted in azoospermia 3 /// | 9.57E-08 | -2.19 | Normal down vs > 5 Years Off IS Tolerant |
| 1553296_PM_at  | GPR128                          | G protein-coupled receptor 128                                                         | 1.03E-07 | -3.08 | Normal down vs > 5 Years Off IS Tolerant |
| 209608_PM_s_at | ACAT2                           | acetyl-CoA acetyltransferase 2                                                         | 1.10E-07 | 1.85  | Normal up vs > 5 Years Off IS Tolerant   |
| 241364_PM_at   | TMEM57                          | transmembrane protein 57                                                               | 1.14E-07 | 2.38  | Normal up vs > 5 Years Off IS Tolerant   |
| 204951_PM_at   | RHOH                            | ras homolog gene family, member H                                                      | 1.17E-07 | 3.67  | Normal up vs > 5 Years Off IS Tolerant   |
| 202693_PM_s_at | STK17A                          | serine/threonine kinase 17a                                                            | 1.22E-07 | 2.43  | Normal up vs > 5 Years Off IS Tolerant   |
| 219513_PM_s_at | SH2D3A                          | SH2 domain containing 3A                                                               | 1.31E-07 | 2.60  | Normal up vs > 5 Years Off IS Tolerant   |

|                             |              |                                                   |          |       |                                          |
|-----------------------------|--------------|---------------------------------------------------|----------|-------|------------------------------------------|
| 214298_PM_x_at              | 6-Sep        | septin 6                                          | 1.32E-07 | 2.72  | Normal up vs > 5 Years Off IS Tolerant   |
| 217028_PM_at                | CXCR4        | chemokine (C-X-C motif) receptor 4                | 1.54E-07 | 2.07  | Normal up vs > 5 Years Off IS Tolerant   |
| 221756_PM_at                | PIK3IP1      | phosphoinositide-3-kinase interacting protein 1   | 1.60E-07 | 2.74  | Normal up vs > 5 Years Off IS Tolerant   |
| 223130_PM_s_at              | MYLIP        | myosin regulatory light chain interacting protein | 1.63E-07 | 2.29  | Normal up vs > 5 Years Off IS Tolerant   |
| 230285_PM_at                | SVIP         | small VCP/p97-interacting protein                 | 1.65E-07 | 3.99  | Normal up vs > 5 Years Off IS Tolerant   |
| AFFX-<br>HSAC07/X00351_3_at | ACTB         | actin, beta                                       | 2.18E-07 | -1.20 | Normal down vs > 5 Years Off IS Tolerant |
| 207522_PM_s_at              | ATP2A3       | ATPase, Ca++ transporting, ubiquitous             | 2.31E-07 | 2.36  | Normal up vs > 5 Years Off IS Tolerant   |
| 202724_PM_s_at              | FOXO1        | forkhead box O1                                   | 2.52E-07 | 2.38  | Normal up vs > 5 Years Off IS Tolerant   |
| 219442_PM_at                | KIAA0664L3   | KIAA0664-like 3                                   | 2.54E-07 | 3.32  | Normal up vs > 5 Years Off IS Tolerant   |
| 202711_PM_at                | EFNB1        | ephrin-B1                                         | 2.61E-07 | -1.50 | Normal down vs > 5 Years Off IS Tolerant |
| 213199_PM_at                | C2CD3        | C2 calcium-dependent domain containing 3          | 2.74E-07 | 1.73  | Normal up vs > 5 Years Off IS Tolerant   |
| 215699_PM_x_at              | SFI1         | Sfi1 homolog, spindle assembly associated (yeast) | 2.77E-07 | 2.24  | Normal up vs > 5 Years Off IS Tolerant   |
| 223129_PM_x_at              | MYLIP        | myosin regulatory light chain interacting protein | 2.87E-07 | 2.09  | Normal up vs > 5 Years Off IS Tolerant   |
| 243399_PM_at                | ---          | ---                                               | 2.91E-07 | -1.90 | Normal down vs > 5 Years Off IS Tolerant |
| 36545_PM_s_at               | SFI1         | Sfi1 homolog, spindle assembly associated (yeast) | 3.05E-07 | 2.48  | Normal up vs > 5 Years Off IS Tolerant   |
| 225458_PM_at                | LOC25845     | hypothetical LOC25845                             | 3.09E-07 | 3.05  | Normal up vs > 5 Years Off IS Tolerant   |
| 201189_PM_s_at              | ITPR3        | inositol 1,4,5-triphosphate receptor, type 3      | 3.14E-07 | 2.72  | Normal up vs > 5 Years Off IS Tolerant   |
| 227353_PM_at                | TMC8         | transmembrane channel-like 8                      | 3.20E-07 | 2.16  | Normal up vs > 5 Years Off IS Tolerant   |
| 221919_PM_at                | LOC100506653 | hypothetical LOC100506653                         | 3.48E-07 | 3.29  | Normal up vs > 5 Years Off IS Tolerant   |

|                |              |                                                                     |          |       |                                          |
|----------------|--------------|---------------------------------------------------------------------|----------|-------|------------------------------------------|
| 227109_PM_at   | CYP2R1       | cytochrome P450, family 2, subfamily R, polypeptide 1               | 3.78E-07 | 1.87  | Normal up vs > 5 Years Off IS Tolerant   |
| 223092_PM_at   | ANKH         | ankylosis, progressive homolog (mouse)                              | 4.26E-07 | 2.85  | Normal up vs > 5 Years Off IS Tolerant   |
| 222649_PM_at   | XPO4         | exportin 4                                                          | 4.61E-07 | 1.63  | Normal up vs > 5 Years Off IS Tolerant   |
| 226732_PM_at   | RBM33        | RNA binding motif protein 33                                        | 4.67E-07 | 1.76  | Normal up vs > 5 Years Off IS Tolerant   |
| 213483_PM_at   | PPWD1        | peptidylprolyl isomerase domain and WD repeat containing 1          | 4.87E-07 | 1.87  | Normal up vs > 5 Years Off IS Tolerant   |
| 202761_PM_s_at | SYNE2        | spectrin repeat containing, nuclear envelope 2                      | 5.73E-07 | 3.67  | Normal up vs > 5 Years Off IS Tolerant   |
| 226156_PM_at   | AKT2         | v-akt murine thymoma viral oncogene homolog 2                       | 6.19E-07 | 1.81  | Normal up vs > 5 Years Off IS Tolerant   |
| 205213_PM_at   | ACAP1        | ArfGAP with coiled-coil, ankyrin repeat and PH domains 1            | 6.53E-07 | 2.18  | Normal up vs > 5 Years Off IS Tolerant   |
| 212029_PM_s_at | LOC100506002 | hypothetical protein LOC100506002                                   | 6.75E-07 | -1.64 | Normal down vs > 5 Years Off IS Tolerant |
| 225175_PM_s_at | SLC44A2      | solute carrier family 44, member 2                                  | 6.92E-07 | 1.68  | Normal up vs > 5 Years Off IS Tolerant   |
| 200965_PM_s_at | ABLIM1       | actin binding LIM protein 1                                         | 6.96E-07 | 3.66  | Normal up vs > 5 Years Off IS Tolerant   |
| 218494_PM_s_at | SLC2A4RG     | SLC2A4 regulator                                                    | 7.03E-07 | 2.58  | Normal up vs > 5 Years Off IS Tolerant   |
| 202813_PM_at   | TARBP1       | TAR (HIV-1) RNA binding protein 1                                   | 7.09E-07 | 2.03  | Normal up vs > 5 Years Off IS Tolerant   |
| 225747_PM_at   | COQ10A       | coenzyme Q10 homolog A (S. cerevisiae)                              | 7.28E-07 | 1.89  | Normal up vs > 5 Years Off IS Tolerant   |
| 224477_PM_s_at | NUDT16L1     | nudix (nucleoside diphosphate linked moiety X)-type motif 16-like 1 | 7.44E-07 | 1.59  | Normal up vs > 5 Years Off IS Tolerant   |
| 205961_PM_s_at | PSIP1        | PC4 and SFRS1 interacting protein 1                                 | 7.49E-07 | 2.68  | Normal up vs > 5 Years Off IS Tolerant   |
| 218551_PM_at   | MIIP         | migration and invasion inhibitory protein                           | 7.54E-07 | -1.57 | Normal down vs > 5 Years Off IS Tolerant |
| 1552633_PM_at  | ZNF101       | zinc finger protein 101                                             | 7.77E-07 | 2.48  | Normal up vs > 5 Years Off IS Tolerant   |
| 201464_PM_x_at | JUN          | jun proto-oncogene                                                  | 7.82E-07 | 2.43  | Normal up vs > 5 Years Off IS Tolerant   |

|                |              |                                                                                         |          |       |                                          |
|----------------|--------------|-----------------------------------------------------------------------------------------|----------|-------|------------------------------------------|
| 224579_PM_at   | SLC38A1      | solute carrier family 38, member 1                                                      | 8.02E-07 | 2.27  | Normal up vs > 5 Years Off IS Tolerant   |
| 205152_PM_at   | SLC6A1       | solute carrier family 6 (neurotransmitter transporter, GABA), member 1                  | 8.17E-07 | -1.41 | Normal down vs > 5 Years Off IS Tolerant |
| 239450_PM_at   | ---          | ---                                                                                     | 8.57E-07 | 2.39  | Normal up vs > 5 Years Off IS Tolerant   |
| 214615_PM_at   | P2RY10       | purinergic receptor P2Y, G-protein coupled, 10                                          | 8.63E-07 | 2.64  | Normal up vs > 5 Years Off IS Tolerant   |
| 226247_PM_at   | PLEKHA1      | pleckstrin homology domain containing, family A (phosphoinositide binding specific) mem | 8.70E-07 | 2.21  | Normal up vs > 5 Years Off IS Tolerant   |
| 200052_PM_s_at | ILF2         | interleukin enhancer binding factor 2, 45kDa                                            | 9.16E-07 | 1.72  | Normal up vs > 5 Years Off IS Tolerant   |
| 212256_PM_at   | GALNT10      | UDP-N-acetyl-alpha-D-galactosamine:polypeptide N-acetylgalactosaminyltransferase 10 (Ga | 9.30E-07 | 1.89  | Normal up vs > 5 Years Off IS Tolerant   |
| 225820_PM_at   | PHF17        | PHD finger protein 17                                                                   | 9.74E-07 | 2.37  | Normal up vs > 5 Years Off IS Tolerant   |
| 1563469_PM_at  | ---          | ---                                                                                     | 9.76E-07 | 2.80  | Normal up vs > 5 Years Off IS Tolerant   |
| 201074_PM_at   | SMARCC1      | SWI/SNF related, matrix associated, actin dependent regulator of chromatin, subfamily c | 9.91E-07 | 1.65  | Normal up vs > 5 Years Off IS Tolerant   |
| 218972_PM_at   | TTC17        | tetratricopeptide repeat domain 17                                                      | 1.03E-06 | 1.74  | Normal up vs > 5 Years Off IS Tolerant   |
| 208763_PM_s_at | TSC22D3      | TSC22 domain family, member 3                                                           | 1.03E-06 | 1.59  | Normal up vs > 5 Years Off IS Tolerant   |
| 206059_PM_at   | ZNF91        | zinc finger protein 91                                                                  | 1.04E-06 | 2.61  | Normal up vs > 5 Years Off IS Tolerant   |
| 228606_PM_at   | TCTEX1D2     | Tctex1 domain containing 2                                                              | 1.14E-06 | 2.59  | Normal up vs > 5 Years Off IS Tolerant   |
| 221123_PM_x_at | ZNF395       | zinc finger protein 395                                                                 | 1.15E-06 | 2.50  | Normal up vs > 5 Years Off IS Tolerant   |
| 243824_PM_at   | LOC100505956 | hypothetical LOC100505956                                                               | 1.22E-06 | -3.96 | Normal down vs > 5 Years Off IS Tolerant |
| 209271_PM_at   | BPTF         | bromodomain PHD finger transcription factor                                             | 1.25E-06 | 1.65  | Normal up vs > 5 Years Off IS Tolerant   |
| 206363_PM_at   | MAF          | v-maf musculoaponeurotic fibrosarcoma oncogene homolog (avian)                          | 1.26E-06 | 3.26  | Normal up vs > 5 Years Off IS Tolerant   |
| 208614_PM_s_at | FLNB         | filamin B, beta                                                                         | 1.26E-06 | 2.03  | Normal up vs > 5 Years Off IS Tolerant   |

|                 |         |                                                                          |          |       |                                          |
|-----------------|---------|--------------------------------------------------------------------------|----------|-------|------------------------------------------|
| 231530_PM_s_at  | C11orf1 | chromosome 11 open reading frame 1                                       | 1.27E-06 | 2.95  | Normal up vs > 5 Years Off IS Tolerant   |
| 221519_PM_at    | FBXW4   | F-box and WD repeat domain containing 4                                  | 1.38E-06 | 1.72  | Normal up vs > 5 Years Off IS Tolerant   |
| 201465_PM_s_at  | JUN     | jun proto-oncogene                                                       | 1.39E-06 | 3.11  | Normal up vs > 5 Years Off IS Tolerant   |
| 226452_PM_at    | PDK1    | pyruvate dehydrogenase kinase, isozyme 1                                 | 1.39E-06 | 2.89  | Normal up vs > 5 Years Off IS Tolerant   |
| 210222_PM_s_at  | RTN1    | reticulon 1                                                              | 1.43E-06 | -2.44 | Normal down vs > 5 Years Off IS Tolerant |
| 226123_PM_at    | CHD7    | chromodomain helicase DNA binding protein 7                              | 1.46E-06 | 2.38  | Normal up vs > 5 Years Off IS Tolerant   |
| 202723_PM_s_at  | FOXO1   | forkhead box O1                                                          | 1.51E-06 | 1.91  | Normal up vs > 5 Years Off IS Tolerant   |
| 236772_PM_s_at  | ---     | ---                                                                      | 1.54E-06 | -1.96 | Normal down vs > 5 Years Off IS Tolerant |
| 223029_PM_s_at  | TRAF7   | TNF receptor-associated factor 7                                         | 1.58E-06 | -1.72 | Normal down vs > 5 Years Off IS Tolerant |
| 219126_PM_at    | PHF10   | PHD finger protein 10                                                    | 1.59E-06 | 1.54  | Normal up vs > 5 Years Off IS Tolerant   |
| 241971_PM_at    | ---     | ---                                                                      | 1.59E-06 | -1.52 | Normal down vs > 5 Years Off IS Tolerant |
| 38340_PM_at     | HIP1R   | huntingtin interacting protein 1 related                                 | 1.62E-06 | 2.43  | Normal up vs > 5 Years Off IS Tolerant   |
| 204176_PM_at    | KLHL20  | kelch-like 20 (Drosophila)                                               | 1.63E-06 | 2.99  | Normal up vs > 5 Years Off IS Tolerant   |
| 234701_PM_at    | ANKRD11 | ankyrin repeat domain 11                                                 | 1.68E-06 | 1.74  | Normal up vs > 5 Years Off IS Tolerant   |
| 228291_PM_s_at  | PLK1S1  | polo-like kinase 1 substrate 1                                           | 1.69E-06 | 1.73  | Normal up vs > 5 Years Off IS Tolerant   |
| 226795_PM_at    | LRCH1   | leucine-rich repeats and calponin homology (CH) domain containing 1      | 1.76E-06 | 1.90  | Normal up vs > 5 Years Off IS Tolerant   |
| 1554470_PM_s_at | ZBTB44  | zinc finger and BTB domain containing 44                                 | 1.76E-06 | 2.08  | Normal up vs > 5 Years Off IS Tolerant   |
| 202524_PM_s_at  | SPOCK2  | sparc/osteonectin, cwcv and kazal-like domains proteoglycan (testican) 2 | 1.79E-06 | 2.68  | Normal up vs > 5 Years Off IS Tolerant   |
| 213867_PM_x_at  | ACTB    | actin, beta                                                              | 1.82E-06 | -1.18 | Normal down vs > 5 Years Off IS Tolerant |

|                |          |                                                          |          |       |                                          |
|----------------|----------|----------------------------------------------------------|----------|-------|------------------------------------------|
| 201498_PM_at   | USP7     | ubiquitin specific peptidase 7 (herpes virus-associated) | 1.83E-06 | 1.38  | Normal up vs > 5 Years Off IS Tolerant   |
| 227517_PM_s_at | GAS5     | growth arrest-specific 5 (non-protein coding)            | 1.83E-06 | 2.20  | Normal up vs > 5 Years Off IS Tolerant   |
| 202782_PM_s_at | INPP5K   | inositol polyphosphate-5-phosphatase K                   | 1.84E-06 | 1.74  | Normal up vs > 5 Years Off IS Tolerant   |
| 240379_PM_at   | PKP4     | plakophilin 4                                            | 1.84E-06 | -1.69 | Normal down vs > 5 Years Off IS Tolerant |
| 213940_PM_s_at | FBNP1    | formin binding protein 1                                 | 1.89E-06 | 1.41  | Normal up vs > 5 Years Off IS Tolerant   |
| 239014_PM_at   | CCAR1    | Cell division cycle and apoptosis regulator 1            | 1.92E-06 | 1.92  | Normal up vs > 5 Years Off IS Tolerant   |
| 226967_PM_at   | FIZ1     | FLT3-interacting zinc finger 1                           | 1.92E-06 | -1.81 | Normal down vs > 5 Years Off IS Tolerant |
| 202913_PM_at   | ARHGEF11 | Rho guanine nucleotide exchange factor (GEF) 11          | 1.96E-06 | -1.59 | Normal down vs > 5 Years Off IS Tolerant |
| 201057_PM_s_at | GOLGB1   | golgin B1                                                | 2.15E-06 | 1.53  | Normal up vs > 5 Years Off IS Tolerant   |
| 241944_PM_x_at | ---      | ---                                                      | 2.20E-06 | -1.80 | Normal down vs > 5 Years Off IS Tolerant |
| 232394_PM_at   | ---      | ---                                                      | 2.21E-06 | -1.57 | Normal down vs > 5 Years Off IS Tolerant |
| 223976_PM_at   | FUT10    | fucosyltransferase 10 (alpha (1,3) fucosyltransferase)   | 2.21E-06 | -1.46 | Normal down vs > 5 Years Off IS Tolerant |
| 210269_PM_s_at | AKAP17A  | A kinase (PRKA) anchor protein 17A                       | 2.21E-06 | 2.09  | Normal up vs > 5 Years Off IS Tolerant   |
| 236839_PM_at   | ---      | ---                                                      | 2.23E-06 | 1.81  | Normal up vs > 5 Years Off IS Tolerant   |
| 234710_PM_s_at | PARP6    | poly (ADP-ribose) polymerase family, member 6            | 2.27E-06 | 1.86  | Normal up vs > 5 Years Off IS Tolerant   |
| 213958_PM_at   | CD6      | CD6 molecule                                             | 2.29E-06 | 2.95  | Normal up vs > 5 Years Off IS Tolerant   |
| 224699_PM_s_at | ESYT2    | extended synaptotagmin-like protein 2                    | 2.34E-06 | 2.11  | Normal up vs > 5 Years Off IS Tolerant   |
| 218552_PM_at   | ECHDC2   | enoyl CoA hydratase domain containing 2                  | 2.37E-06 | 2.07  | Normal up vs > 5 Years Off IS Tolerant   |
| 226564_PM_at   | ZFAT     | zinc finger and AT hook domain containing                | 2.38E-06 | -2.74 | Normal down vs > 5 Years Off IS Tolerant |

|                 |           |                                                                                         |          |       |                                          |
|-----------------|-----------|-----------------------------------------------------------------------------------------|----------|-------|------------------------------------------|
| 37004_PM_at     | SFTPB     | surfactant protein B                                                                    | 2.42E-06 | -1.56 | Normal down vs > 5 Years Off IS Tolerant |
| 230489_PM_at    | CD5       | CD5 molecule                                                                            | 2.53E-06 | 2.97  | Normal up vs > 5 Years Off IS Tolerant   |
| 224609_PM_at    | SLC44A2   | solute carrier family 44, member 2                                                      | 2.54E-06 | 1.83  | Normal up vs > 5 Years Off IS Tolerant   |
| 227697_PM_at    | SOCS3     | suppressor of cytokine signaling 3                                                      | 2.55E-06 | 3.78  | Normal up vs > 5 Years Off IS Tolerant   |
| 213015_PM_at    | BBX       | bobby sox homolog (Drosophila)                                                          | 2.57E-06 | 1.53  | Normal up vs > 5 Years Off IS Tolerant   |
| 209431_PM_s_at  | PATZ1     | POZ (BTB) and AT hook containing zinc finger 1                                          | 2.61E-06 | 1.85  | Normal up vs > 5 Years Off IS Tolerant   |
| 217689_PM_at    | PTPN1     | Protein tyrosine phosphatase, non-receptor type 1                                       | 2.62E-06 | -1.42 | Normal down vs > 5 Years Off IS Tolerant |
| 218673_PM_s_at  | ATG7      | ATG7 autophagy related 7 homolog (S. cerevisiae)                                        | 2.66E-06 | -2.18 | Normal down vs > 5 Years Off IS Tolerant |
| 206359_PM_at    | SOCS3     | suppressor of cytokine signaling 3                                                      | 2.87E-06 | 3.45  | Normal up vs > 5 Years Off IS Tolerant   |
| 228797_PM_at    | NLN       | neurolysin (metallopeptidase M3 family)                                                 | 2.89E-06 | -2.05 | Normal down vs > 5 Years Off IS Tolerant |
| 202780_PM_at    | OXCT1     | 3-oxoacid CoA transferase 1                                                             | 2.93E-06 | 2.07  | Normal up vs > 5 Years Off IS Tolerant   |
| 225220_PM_at    | SNHG8     | small nucleolar RNA host gene 8 (non-protein coding)                                    | 2.94E-06 | 1.92  | Normal up vs > 5 Years Off IS Tolerant   |
| 216044_PM_x_at  | FAM69A    | family with sequence similarity 69, member A                                            | 3.01E-06 | 2.87  | Normal up vs > 5 Years Off IS Tolerant   |
| 201075_PM_s_at  | SMARCC1   | SWI/SNF related, matrix associated, actin dependent regulator of chromatin, subfamily c | 3.08E-06 | 2.40  | Normal up vs > 5 Years Off IS Tolerant   |
| 201345_PM_s_at  | UBE2D2    | ubiquitin-conjugating enzyme E2D 2 (UBC4/5 homolog, yeast)                              | 3.12E-06 | 1.49  | Normal up vs > 5 Years Off IS Tolerant   |
| 222045_PM_s_at  | PCIF1     | PDX1 C-terminal inhibiting factor 1                                                     | 3.13E-06 | 4.63  | Normal up vs > 5 Years Off IS Tolerant   |
| 221698_PM_s_at  | CLEC7A    | C-type lectin domain family 7, member A                                                 | 3.15E-06 | -1.84 | Normal down vs > 5 Years Off IS Tolerant |
| 203230_PM_at    | DVL1      | dishevelled, dsh homolog 1 (Drosophila)                                                 | 3.23E-06 | 1.64  | Normal up vs > 5 Years Off IS Tolerant   |
| 1556046_PM_a_at | LOC157627 | hypothetical LOC157627                                                                  | 3.33E-06 | -2.06 | Normal down vs > 5 Years Off IS Tolerant |

|                |          |                                                                                |          |       |                                          |
|----------------|----------|--------------------------------------------------------------------------------|----------|-------|------------------------------------------|
| 227357_PM_at   | TAB3     | TGF-beta activated kinase 1/MAP3K7 binding protein 3                           | 3.40E-06 | 1.63  | Normal up vs > 5 Years Off IS Tolerant   |
| 215031_PM_x_at | RNF126   | ring finger protein 126                                                        | 3.43E-06 | 1.77  | Normal up vs > 5 Years Off IS Tolerant   |
| 218764_PM_at   | PRKCH    | protein kinase C, eta                                                          | 3.47E-06 | 2.59  | Normal up vs > 5 Years Off IS Tolerant   |
| 229892_PM_at   | EP400NL  | EP400 N-terminal like                                                          | 3.50E-06 | 1.81  | Normal up vs > 5 Years Off IS Tolerant   |
| 218769_PM_s_at | ANKRA2   | ankyrin repeat, family A (RFXANK-like), 2                                      | 3.54E-06 | 2.02  | Normal up vs > 5 Years Off IS Tolerant   |
| 217851_PM_s_at | SLMO2    | slowmo homolog 2 (Drosophila)                                                  | 3.55E-06 | 2.52  | Normal up vs > 5 Years Off IS Tolerant   |
| 217925_PM_s_at | C6orf106 | chromosome 6 open reading frame 106                                            | 3.58E-06 | 1.89  | Normal up vs > 5 Years Off IS Tolerant   |
| 208073_PM_x_at | TTC3     | tetratricopeptide repeat domain 3                                              | 3.59E-06 | 1.56  | Normal up vs > 5 Years Off IS Tolerant   |
| 1564317_PM_at  | ---      | ---                                                                            | 3.64E-06 | -2.10 | Normal down vs > 5 Years Off IS Tolerant |
| 231718_PM_at   | SLU7     | SLU7 splicing factor homolog (S. cerevisiae)                                   | 3.65E-06 | 1.71  | Normal up vs > 5 Years Off IS Tolerant   |
| 220319_PM_s_at | MYLIP    | myosin regulatory light chain interacting protein                              | 3.74E-06 | 2.61  | Normal up vs > 5 Years Off IS Tolerant   |
| 224783_PM_at   | FAM100B  | family with sequence similarity 100, member B                                  | 3.76E-06 | 1.94  | Normal up vs > 5 Years Off IS Tolerant   |
| 223008_PM_s_at | C9orf5   | chromosome 9 open reading frame 5                                              | 3.82E-06 | 2.03  | Normal up vs > 5 Years Off IS Tolerant   |
| 212675_PM_s_at | CEP68    | centrosomal protein 68kDa                                                      | 3.85E-06 | 2.78  | Normal up vs > 5 Years Off IS Tolerant   |
| 226914_PM_at   | ARPC5L   | actin related protein 2/3 complex, subunit 5-like                              | 3.88E-06 | 2.20  | Normal up vs > 5 Years Off IS Tolerant   |
| 203580_PM_s_at | SLC7A6   | solute carrier family 7 (cationic amino acid transporter, y+ system), member 6 | 3.96E-06 | 2.25  | Normal up vs > 5 Years Off IS Tolerant   |
| 218456_PM_at   | CAPRIN2  | caprin family member 2                                                         | 4.00E-06 | 1.78  | Normal up vs > 5 Years Off IS Tolerant   |
| 202423_PM_at   | MYST3    | MYST histone acetyltransferase (monocytic leukemia) 3                          | 4.01E-06 | 1.64  | Normal up vs > 5 Years Off IS Tolerant   |
| 223773_PM_s_at | SNHG12   | small nucleolar RNA host gene 12 (non-protein coding)                          | 4.07E-06 | 1.97  | Normal up vs > 5 Years Off IS Tolerant   |



|                |                   |                                                                                     |          |       |                                          |
|----------------|-------------------|-------------------------------------------------------------------------------------|----------|-------|------------------------------------------|
| 227784_PM_s_at | COG1              | component of oligomeric golgi complex 1                                             | 4.13E-06 | 2.03  | Normal up vs > 5 Years Off IS Tolerant   |
| 228458_PM_at   | C6orf226          | chromosome 6 open reading frame 226                                                 | 4.19E-06 | 2.16  | Normal up vs > 5 Years Off IS Tolerant   |
| 1563154_PM_at  | ---               | ---                                                                                 | 4.19E-06 | -1.45 | Normal down vs > 5 Years Off IS Tolerant |
| 201715_PM_s_at | ACIN1             | apoptotic chromatin condensation inducer 1                                          | 4.21E-06 | 1.73  | Normal up vs > 5 Years Off IS Tolerant   |
| 225758_PM_s_at | TUBGCP6           | tubulin, gamma complex associated protein 6                                         | 4.23E-06 | 2.08  | Normal up vs > 5 Years Off IS Tolerant   |
| 208336_PM_s_at | TECR              | trans-2,3-enoyl-CoA reductase                                                       | 4.36E-06 | 2.14  | Normal up vs > 5 Years Off IS Tolerant   |
| 219112_PM_at   | FNIP1 /// RAPGEF6 | folliculin interacting protein 1 /// Rap guanine nucleotide exchange factor (GEF) 6 | 4.37E-06 | 2.14  | Normal up vs > 5 Years Off IS Tolerant   |
| 202308_PM_at   | SREBF1            | sterol regulatory element binding transcription factor 1                            | 4.41E-06 | 1.84  | Normal up vs > 5 Years Off IS Tolerant   |
| 209420_PM_s_at | SMPD1             | sphingomyelin phosphodiesterase 1, acid lysosomal                                   | 4.43E-06 | 1.75  | Normal up vs > 5 Years Off IS Tolerant   |
| 205087_PM_at   | RWDD3             | RWD domain containing 3                                                             | 4.54E-06 | 2.06  | Normal up vs > 5 Years Off IS Tolerant   |
| 239428_PM_at   | ---               | ---                                                                                 | 4.59E-06 | -1.74 | Normal down vs > 5 Years Off IS Tolerant |
| 212071_PM_s_at | SPTBN1            | spectrin, beta, non-erythrocytic 1                                                  | 4.63E-06 | 2.26  | Normal up vs > 5 Years Off IS Tolerant   |
| 202928_PM_s_at | PHF1              | PHD finger protein 1                                                                | 4.71E-06 | 2.17  | Normal up vs > 5 Years Off IS Tolerant   |
| 221066_PM_at   | RXFP3             | relaxin/insulin-like family peptide receptor 3                                      | 4.81E-06 | -1.36 | Normal down vs > 5 Years Off IS Tolerant |
| 230640_PM_at   | ---               | ---                                                                                 | 4.84E-06 | 2.41  | Normal up vs > 5 Years Off IS Tolerant   |
| 36552_PM_at    | C2CD3             | C2 calcium-dependent domain containing 3                                            | 4.85E-06 | 1.63  | Normal up vs > 5 Years Off IS Tolerant   |
| 206572_PM_x_at | ZNF85             | zinc finger protein 85                                                              | 4.91E-06 | 1.89  | Normal up vs > 5 Years Off IS Tolerant   |
| 206828_PM_at   | TXK               | TXK tyrosine kinase                                                                 | 4.94E-06 | 3.05  | Normal up vs > 5 Years Off IS Tolerant   |
| 1562496_PM_at  | LOC339539         | hypothetical protein LOC339539                                                      | 5.00E-06 | -1.49 | Normal down vs > 5 Years Off IS Tolerant |

|                 |          |                                                                              |          |       |                                          |
|-----------------|----------|------------------------------------------------------------------------------|----------|-------|------------------------------------------|
| 201677_PM_at    | C3orf37  | Chromosome 3 open reading frame 37                                           | 5.13E-06 | 2.11  | Normal up vs > 5 Years Off IS Tolerant   |
| 200857_PM_s_at  | NCOR1    | nuclear receptor corepressor 1                                               | 5.15E-06 | 1.98  | Normal up vs > 5 Years Off IS Tolerant   |
| 212674_PM_s_at  | DHX30    | DEAH (Asp-Glu-Ala-His) box polypeptide 30                                    | 5.26E-06 | 1.50  | Normal up vs > 5 Years Off IS Tolerant   |
| 232187_PM_at    | PALMD    | palmdelphin                                                                  | 5.29E-06 | -1.65 | Normal down vs > 5 Years Off IS Tolerant |
| 213431_PM_x_at  | SFI1     | Sfi1 homolog, spindle assembly associated (yeast)                            | 5.33E-06 | 2.16  | Normal up vs > 5 Years Off IS Tolerant   |
| 204431_PM_at    | TLE2     | transducin-like enhancer of split 2 (E(sp1) homolog, Drosophila)             | 5.36E-06 | 1.75  | Normal up vs > 5 Years Off IS Tolerant   |
| 222728_PM_s_at  | TAF1D    | TATA box binding protein (TBP)-associated factor, RNA polymerase I, D, 41kDa | 5.40E-06 | 1.58  | Normal up vs > 5 Years Off IS Tolerant   |
| 225931_PM_s_at  | RNF213   | ring finger protein 213                                                      | 5.44E-06 | 1.69  | Normal up vs > 5 Years Off IS Tolerant   |
| 223162_PM_s_at  | KIAA1147 | KIAA1147                                                                     | 5.45E-06 | 1.83  | Normal up vs > 5 Years Off IS Tolerant   |
| 234106_PM_s_at  | FLYWCH1  | FLYWCH-type zinc finger 1                                                    | 5.67E-06 | 1.79  | Normal up vs > 5 Years Off IS Tolerant   |
| 233785_PM_at    | ADAMTS9  | ADAM metallopeptidase with thrombospondin type 1 motif, 9                    | 5.69E-06 | -1.47 | Normal down vs > 5 Years Off IS Tolerant |
| 1557053_PM_s_at | UBE2G2   | ubiquitin-conjugating enzyme E2G 2 (UBC7 homolog, yeast)                     | 5.76E-06 | 1.49  | Normal up vs > 5 Years Off IS Tolerant   |
| 235353_PM_at    | SEL1L3   | sel-1 suppressor of lin-12-like 3 (C. elegans)                               | 5.79E-06 | 2.69  | Normal up vs > 5 Years Off IS Tolerant   |
| 202104_PM_s_at  | SPG7     | spastic paraplegia 7 (pure and complicated autosomal recessive)              | 5.84E-06 | 1.83  | Normal up vs > 5 Years Off IS Tolerant   |
| 243010_PM_at    | MSI2     | musashi homolog 2 (Drosophila)                                               | 5.86E-06 | 1.82  | Normal up vs > 5 Years Off IS Tolerant   |
| 233892_PM_at    | GRIN3B   | glutamate receptor, ionotropic, N-methyl-D-aspartate 3B                      | 5.87E-06 | -1.46 | Normal down vs > 5 Years Off IS Tolerant |
| 236796_PM_at    | BACH2    | BTB and CNC homology 1, basic leucine zipper transcription factor 2          | 5.90E-06 | 3.67  | Normal up vs > 5 Years Off IS Tolerant   |
| 212557_PM_at    | ZNF451   | zinc finger protein 451                                                      | 6.01E-06 | 1.56  | Normal up vs > 5 Years Off IS Tolerant   |
| 242643_PM_x_at  | ---      | ---                                                                          | 6.09E-06 | -1.50 | Normal down vs > 5 Years Off IS Tolerant |

|                 |                          |                                                                                          |          |       |                                          |
|-----------------|--------------------------|------------------------------------------------------------------------------------------|----------|-------|------------------------------------------|
| 1569629_PM_x_at | LOC389906                | hypothetical LOC389906                                                                   | 6.11E-06 | 1.67  | Normal up vs > 5 Years Off IS Tolerant   |
| 239273_PM_s_at  | MMP28                    | matrix metallopeptidase 28                                                               | 6.17E-06 | 1.80  | Normal up vs > 5 Years Off IS Tolerant   |
| 217839_PM_at    | TFG                      | TRK-fused gene                                                                           | 6.28E-06 | 1.54  | Normal up vs > 5 Years Off IS Tolerant   |
| 226466_PM_s_at  | FAM58A                   | family with sequence similarity 58, member A                                             | 6.51E-06 | 1.69  | Normal up vs > 5 Years Off IS Tolerant   |
| 204215_PM_at    | C7orf23                  | chromosome 7 open reading frame 23                                                       | 6.51E-06 | 2.25  | Normal up vs > 5 Years Off IS Tolerant   |
| 202251_PM_at    | PRPF3                    | PRP3 pre-mRNA processing factor 3 homolog (S. cerevisiae)                                | 6.54E-06 | 1.74  | Normal up vs > 5 Years Off IS Tolerant   |
| 1560735_PM_s_at | LOC727924                | hypothetical LOC727924                                                                   | 6.61E-06 | -2.05 | Normal down vs > 5 Years Off IS Tolerant |
| 229415_PM_at    | CYCS                     | cytochrome c, somatic                                                                    | 6.73E-06 | 2.17  | Normal up vs > 5 Years Off IS Tolerant   |
| 204082_PM_at    | PBX3                     | pre-B-cell leukemia homeobox 3                                                           | 6.75E-06 | 1.71  | Normal up vs > 5 Years Off IS Tolerant   |
| 204294_PM_at    | AMT                      | aminomethyltransferase                                                                   | 6.91E-06 | 1.78  | Normal up vs > 5 Years Off IS Tolerant   |
| 230703_PM_at    | ---                      | ---                                                                                      | 6.92E-06 | 2.20  | Normal up vs > 5 Years Off IS Tolerant   |
| 214051_PM_at    | TMSB15B                  | thymosin beta 15B                                                                        | 6.96E-06 | 1.88  | Normal up vs > 5 Years Off IS Tolerant   |
| 238440_PM_at    | CLYBL                    | citrate lyase beta like                                                                  | 7.03E-06 | 2.34  | Normal up vs > 5 Years Off IS Tolerant   |
| 207861_PM_at    | CCL22                    | chemokine (C-C motif) ligand 22                                                          | 7.07E-06 | -1.51 | Normal down vs > 5 Years Off IS Tolerant |
| 229628_PM_s_at  | C9orf174 ///<br>LOC57653 | chromosome 9 open reading frame 174 ///<br>LOC100499484-C9orf174 read-through transcript | 7.10E-06 | 2.13  | Normal up vs > 5 Years Off IS Tolerant   |
| 235020_PM_at    | TAF4B                    | TAF4b RNA polymerase II, TATA box binding protein (TBP)-associated factor, 105kDa        | 7.14E-06 | 2.28  | Normal up vs > 5 Years Off IS Tolerant   |
| 208860_PM_s_at  | ATRX                     | alpha thalassemia/mental retardation syndrome X-linked                                   | 7.19E-06 | 1.75  | Normal up vs > 5 Years Off IS Tolerant   |
| 240436_PM_at    | LOC650794                | Similar to FRAS1 related extracellular matrix protein 2                                  | 7.26E-06 | -1.56 | Normal down vs > 5 Years Off IS Tolerant |
| 200642_PM_at    | SOD1                     | superoxide dismutase 1, soluble                                                          | 7.37E-06 | 1.62  | Normal up vs > 5 Years Off IS Tolerant   |

|                |                   |                                                                            |          |       |                                          |
|----------------|-------------------|----------------------------------------------------------------------------|----------|-------|------------------------------------------|
| 215820_PM_x_at | SNX13             | sorting nexin 13                                                           | 7.43E-06 | -1.61 | Normal down vs > 5 Years Off IS Tolerant |
| 231449_PM_at   | ---               | ---                                                                        | 7.49E-06 | -1.88 | Normal down vs > 5 Years Off IS Tolerant |
| 229935_PM_s_at | MLL               | Myeloid/lymphoid or mixed-lineage leukemia (trithorax homolog, Drosophila) | 7.49E-06 | -1.55 | Normal down vs > 5 Years Off IS Tolerant |
| 219435_PM_at   | C17orf68          | chromosome 17 open reading frame 68                                        | 7.52E-06 | 1.99  | Normal up vs > 5 Years Off IS Tolerant   |
| 203543_PM_s_at | KLF9              | Kruppel-like factor 9                                                      | 7.56E-06 | 3.81  | Normal up vs > 5 Years Off IS Tolerant   |
| 216862_PM_s_at | MTCP1NB           | mature T-cell proliferation 1 neighbor                                     | 7.63E-06 | 1.66  | Normal up vs > 5 Years Off IS Tolerant   |
| 217019_PM_at   | RPS4X /// RPS4XP6 | ribosomal protein S4, X-linked /// ribosomal protein S4X pseudogene 6      | 7.63E-06 | 2.05  | Normal up vs > 5 Years Off IS Tolerant   |
| 223216_PM_x_at | ZNF395            | zinc finger protein 395                                                    | 7.80E-06 | 2.31  | Normal up vs > 5 Years Off IS Tolerant   |
| 212229_PM_s_at | FBXO21            | F-box protein 21                                                           | 7.83E-06 | 1.56  | Normal up vs > 5 Years Off IS Tolerant   |
| 201092_PM_at   | RBBP7             | retinoblastoma binding protein 7                                           | 7.85E-06 | 1.35  | Normal up vs > 5 Years Off IS Tolerant   |
| 239553_PM_at   | LOC729420         | hypothetical LOC729420                                                     | 7.89E-06 | -1.42 | Normal down vs > 5 Years Off IS Tolerant |
| 238105_PM_x_at | WNT7B             | wingless-type MMTV integration site family, member 7B                      | 7.97E-06 | -1.86 | Normal down vs > 5 Years Off IS Tolerant |
| 239721_PM_at   | ---               | ---                                                                        | 8.01E-06 | 2.04  | Normal up vs > 5 Years Off IS Tolerant   |
| 202832_PM_at   | GCC2              | GRIP and coiled-coil domain containing 2                                   | 8.03E-06 | 2.01  | Normal up vs > 5 Years Off IS Tolerant   |
| 218772_PM_x_at | TMEM38B           | transmembrane protein 38B                                                  | 8.07E-06 | 2.01  | Normal up vs > 5 Years Off IS Tolerant   |
| 1568733_PM_at  | C10orf76          | chromosome 10 open reading frame 76                                        | 8.12E-06 | 2.66  | Normal up vs > 5 Years Off IS Tolerant   |
| 206118_PM_at   | STAT4             | signal transducer and activator of transcription 4                         | 8.18E-06 | 2.74  | Normal up vs > 5 Years Off IS Tolerant   |
| 229393_PM_at   | L3MBTL3           | l(3)mbt-like 3 (Drosophila)                                                | 8.19E-06 | 1.70  | Normal up vs > 5 Years Off IS Tolerant   |
| 224851_PM_at   | CDK6              | cyclin-dependent kinase 6                                                  | 8.32E-06 | 2.67  | Normal up vs > 5 Years Off IS Tolerant   |

|                |         |                                                                       |          |       |                                          |
|----------------|---------|-----------------------------------------------------------------------|----------|-------|------------------------------------------|
| 238638_PM_at   | SLC37A2 | solute carrier family 37 (glycerol-3-phosphate transporter), member 2 | 8.38E-06 | -2.21 | Normal down vs > 5 Years Off IS Tolerant |
| 227502_PM_at   | ---     | ---                                                                   | 8.53E-06 | 2.50  | Normal up vs > 5 Years Off IS Tolerant   |
| 226327_PM_at   | ZNF507  | zinc finger protein 507                                               | 8.57E-06 | 2.66  | Normal up vs > 5 Years Off IS Tolerant   |
| 223324_PM_s_at | TRPM7   | transient receptor potential cation channel, subfamily M, member 7    | 8.78E-06 | 1.98  | Normal up vs > 5 Years Off IS Tolerant   |
| 219864_PM_s_at | RCAN3   | RCAN family member 3                                                  | 8.90E-06 | 2.55  | Normal up vs > 5 Years Off IS Tolerant   |
| 242438_PM_at   | ASXL1   | additional sex combs like 1 (Drosophila)                              | 8.92E-06 | 2.16  | Normal up vs > 5 Years Off IS Tolerant   |
| 204618_PM_s_at | GABPB1  | GA binding protein transcription factor, beta subunit 1               | 8.93E-06 | 1.95  | Normal up vs > 5 Years Off IS Tolerant   |
| 244808_PM_at   | GRAMD1A | GRAM domain containing 1A                                             | 8.99E-06 | 2.78  | Normal up vs > 5 Years Off IS Tolerant   |
| 201100_PM_s_at | USP9X   | ubiquitin specific peptidase 9, X-linked                              | 9.05E-06 | 1.39  | Normal up vs > 5 Years Off IS Tolerant   |
| 242676_PM_at   | ---     | ---                                                                   | 9.10E-06 | 2.51  | Normal up vs > 5 Years Off IS Tolerant   |
| 241929_PM_at   | ---     | ---                                                                   | 9.11E-06 | -3.09 | Normal down vs > 5 Years Off IS Tolerant |
| 210379_PM_s_at | TLK1    | tousled-like kinase 1                                                 | 9.29E-06 | 3.29  | Normal up vs > 5 Years Off IS Tolerant   |
| 217912_PM_at   | DUS1L   | dihydrouridine synthase 1-like (S. cerevisiae)                        | 9.32E-06 | 1.43  | Normal up vs > 5 Years Off IS Tolerant   |
| 208807_PM_s_at | CHD3    | chromodomain helicase DNA binding protein 3                           | 9.33E-06 | 1.68  | Normal up vs > 5 Years Off IS Tolerant   |
| 220988_PM_s_at | C1QTNF3 | C1q and tumor necrosis factor related protein 3                       | 9.36E-06 | 1.65  | Normal up vs > 5 Years Off IS Tolerant   |
| 226229_PM_s_at | SSU72   | SSU72 RNA polymerase II CTD phosphatase homolog (S. cerevisiae)       | 9.46E-06 | 1.93  | Normal up vs > 5 Years Off IS Tolerant   |
| 222731_PM_at   | ZDHHC2  | zinc finger, DHHC-type containing 2                                   | 9.64E-06 | 1.91  | Normal up vs > 5 Years Off IS Tolerant   |
| 210280_PM_at   | MPZ     | myelin protein zero                                                   | 9.74E-06 | -1.41 | Normal down vs > 5 Years Off IS Tolerant |
| 228174_PM_at   | SCAI    | suppressor of cancer cell invasion                                    | 9.74E-06 | 2.48  | Normal up vs > 5 Years Off IS Tolerant   |

|                |                  |                                                                            |          |       |                                          |
|----------------|------------------|----------------------------------------------------------------------------|----------|-------|------------------------------------------|
| 225942_PM_at   | NLN              | neurolysin (metallopeptidase M3 family)                                    | 9.83E-06 | -1.78 | Normal down vs > 5 Years Off IS Tolerant |
| 233357_PM_at   | TRIM67           | tripartite motif-containing 67                                             | 9.98E-06 | -2.00 | Normal down vs > 5 Years Off IS Tolerant |
| 207250_PM_at   | SIX6             | SIX homeobox 6                                                             | 9.99E-06 | -1.47 | Normal down vs > 5 Years Off IS Tolerant |
| 1559413_PM_at  | TCP11L2          | t-complex 11 (mouse)-like 2                                                | 1.01E-05 | 3.10  | Normal up vs > 5 Years Off IS Tolerant   |
| 208299_PM_at   | CACNA1I          | calcium channel, voltage-dependent, T type, alpha 1I subunit               | 1.03E-05 | -1.50 | Normal down vs > 5 Years Off IS Tolerant |
| 223332_PM_x_at | RNF126           | ring finger protein 126                                                    | 1.07E-05 | 1.69  | Normal up vs > 5 Years Off IS Tolerant   |
| 222108_PM_at   | AMIGO2           | adhesion molecule with Ig-like domain 2                                    | 1.07E-05 | 2.40  | Normal up vs > 5 Years Off IS Tolerant   |
| 212955_PM_s_at | POLR2I           | polymerase (RNA) II (DNA directed) polypeptide I, 14.5kDa                  | 1.09E-05 | 1.90  | Normal up vs > 5 Years Off IS Tolerant   |
| 204198_PM_s_at | RUNX3            | runt-related transcription factor 3                                        | 1.09E-05 | 2.35  | Normal up vs > 5 Years Off IS Tolerant   |
| 219528_PM_s_at | BCL11B           | B-cell CLL/lymphoma 11B (zinc finger protein)                              | 1.11E-05 | 4.15  | Normal up vs > 5 Years Off IS Tolerant   |
| 243323_PM_s_at | ZFHX3            | Zinc finger homeobox 3                                                     | 1.11E-05 | -1.49 | Normal down vs > 5 Years Off IS Tolerant |
| 227485_PM_at   | DDX26B           | DEAD/H (Asp-Glu-Ala-Asp/His) box polypeptide 26B                           | 1.12E-05 | 2.03  | Normal up vs > 5 Years Off IS Tolerant   |
| 217266_PM_at   | RPL15            | ribosomal protein L15                                                      | 1.12E-05 | 2.06  | Normal up vs > 5 Years Off IS Tolerant   |
| 218259_PM_at   | MKL2             | MKL/myocardin-like 2                                                       | 1.14E-05 | 2.32  | Normal up vs > 5 Years Off IS Tolerant   |
| 227607_PM_at   | STAMBPL1         | STAM binding protein-like 1                                                | 1.16E-05 | 2.38  | Normal up vs > 5 Years Off IS Tolerant   |
| 208398_PM_s_at | TBPL1            | TBP-like 1                                                                 | 1.16E-05 | 1.70  | Normal up vs > 5 Years Off IS Tolerant   |
| 200920_PM_s_at | BTG1             | B-cell translocation gene 1, anti-proliferative                            | 1.16E-05 | 1.52  | Normal up vs > 5 Years Off IS Tolerant   |
| 205526_PM_s_at | KATNA1           | katanin p60 (ATPase-containing) subunit A 1                                | 1.17E-05 | 1.65  | Normal up vs > 5 Years Off IS Tolerant   |
| 212591_PM_at   | ARID4B /// RBM34 | AT rich interactive domain 4B (RBP1-like) /// RNA binding motif protein 34 | 1.17E-05 | 1.47  | Normal up vs > 5 Years Off IS Tolerant   |

|                 |              |                                                             |          |       |                                          |
|-----------------|--------------|-------------------------------------------------------------|----------|-------|------------------------------------------|
| 214894_PM_x_at  | MACF1        | microtubule-actin crosslinking factor 1                     | 1.19E-05 | 1.68  | Normal up vs > 5 Years Off IS Tolerant   |
| 208423_PM_s_at  | MSR1         | macrophage scavenger receptor 1                             | 1.20E-05 | -1.42 | Normal down vs > 5 Years Off IS Tolerant |
| 209950_PM_s_at  | VILL         | villin-like                                                 | 1.21E-05 | 1.94  | Normal up vs > 5 Years Off IS Tolerant   |
| 207971_PM_s_at  | CEP68        | centrosomal protein 68kDa                                   | 1.22E-05 | 1.89  | Normal up vs > 5 Years Off IS Tolerant   |
| 222125_PM_s_at  | P4HTM        | prolyl 4-hydroxylase, transmembrane (endoplasmic reticulum) | 1.24E-05 | 1.92  | Normal up vs > 5 Years Off IS Tolerant   |
| 209067_PM_s_at  | HNRPDL       | heterogeneous nuclear ribonucleoprotein D-like              | 1.29E-05 | 1.45  | Normal up vs > 5 Years Off IS Tolerant   |
| 228613_PM_at    | RAB11FIP3    | RAB11 family interacting protein 3 (class II)               | 1.29E-05 | 2.38  | Normal up vs > 5 Years Off IS Tolerant   |
| 203485_PM_at    | RTN1         | reticulon 1                                                 | 1.30E-05 | -2.43 | Normal down vs > 5 Years Off IS Tolerant |
| 1566147_PM_a_at | LOC375010    | ankyrin repeat domain 20 family, member A pseudogene        | 1.30E-05 | -1.99 | Normal down vs > 5 Years Off IS Tolerant |
| 230292_PM_at    | LOC100131993 | Similar to hCG2020760                                       | 1.31E-05 | -2.71 | Normal down vs > 5 Years Off IS Tolerant |
| 1553979_PM_at   | ---          | ---                                                         | 1.32E-05 | 1.56  | Normal up vs > 5 Years Off IS Tolerant   |
| 237143_PM_at    | ---          | ---                                                         | 1.32E-05 | 2.47  | Normal up vs > 5 Years Off IS Tolerant   |
| 203588_PM_s_at  | TFDP2        | transcription factor Dp-2 (E2F dimerization partner 2)      | 1.32E-05 | 2.56  | Normal up vs > 5 Years Off IS Tolerant   |
| 219097_PM_x_at  | C19orf42     | chromosome 19 open reading frame 42                         | 1.32E-05 | -1.41 | Normal down vs > 5 Years Off IS Tolerant |
| 226718_PM_at    | AMIGO1       | adhesion molecule with Ig-like domain 1                     | 1.34E-05 | 2.71  | Normal up vs > 5 Years Off IS Tolerant   |
| 224719_PM_s_at  | C12orf57     | chromosome 12 open reading frame 57                         | 1.35E-05 | 2.65  | Normal up vs > 5 Years Off IS Tolerant   |
| 218505_PM_at    | WDR59        | WD repeat domain 59                                         | 1.37E-05 | 1.70  | Normal up vs > 5 Years Off IS Tolerant   |
| 219419_PM_at    | RBFA         | ribosome binding factor A (putative)                        | 1.39E-05 | 1.66  | Normal up vs > 5 Years Off IS Tolerant   |
| 212783_PM_at    | RBBP6        | retinoblastoma binding protein 6                            | 1.39E-05 | 1.54  | Normal up vs > 5 Years Off IS Tolerant   |

|                |           |                                                                                  |          |       |                                          |
|----------------|-----------|----------------------------------------------------------------------------------|----------|-------|------------------------------------------|
| 220633_PM_s_at | HP1BP3    | heterochromatin protein 1, binding protein 3                                     | 1.41E-05 | 1.72  | Normal up vs > 5 Years Off IS Tolerant   |
| 225635_PM_s_at | LOC401504 | hypothetical LOC401504                                                           | 1.41E-05 | 2.23  | Normal up vs > 5 Years Off IS Tolerant   |
| 238062_PM_at   | GPIHBP1   | glycosylphosphatidylinositol anchored high density lipoprotein binding protein 1 | 1.41E-05 | -1.48 | Normal down vs > 5 Years Off IS Tolerant |
| 222044_PM_at   | PCIF1     | PDX1 C-terminal inhibiting factor 1                                              | 1.41E-05 | 2.66  | Normal up vs > 5 Years Off IS Tolerant   |
| 226012_PM_at   | ANKRD11   | ankyrin repeat domain 11                                                         | 1.41E-05 | 1.81  | Normal up vs > 5 Years Off IS Tolerant   |
| 208623_PM_s_at | EZR       | ezrin                                                                            | 1.44E-05 | 1.86  | Normal up vs > 5 Years Off IS Tolerant   |
| 228111_PM_s_at | DNAH1     | dynein, axonemal, heavy chain 1                                                  | 1.44E-05 | 1.86  | Normal up vs > 5 Years Off IS Tolerant   |
| 201419_PM_at   | BAP1      | BRCA1 associated protein-1 (ubiquitin carboxy-terminal hydrolase)                | 1.46E-05 | 1.51  | Normal up vs > 5 Years Off IS Tolerant   |
| 218932_PM_at   | ZNHIT6    | zinc finger, HIT-type containing 6                                               | 1.52E-05 | 2.31  | Normal up vs > 5 Years Off IS Tolerant   |
| 202904_PM_s_at | LSM5      | LSM5 homolog, U6 small nuclear RNA associated ( <i>S. cerevisiae</i> )           | 1.54E-05 | 2.85  | Normal up vs > 5 Years Off IS Tolerant   |
| 228284_PM_at   | TLE1      | transducin-like enhancer of split 1 ( <i>E(sp1)</i> homolog, <i>Drosophila</i> ) | 1.56E-05 | 5.62  | Normal up vs > 5 Years Off IS Tolerant   |
| 220581_PM_at   | C6orf97   | chromosome 6 open reading frame 97                                               | 1.56E-05 | -1.75 | Normal down vs > 5 Years Off IS Tolerant |
| 225550_PM_at   | CNST      | consortin, connexin sorting protein                                              | 1.56E-05 | 2.57  | Normal up vs > 5 Years Off IS Tolerant   |
| 210212_PM_x_at | MTCP1NB   | mature T-cell proliferation 1 neighbor                                           | 1.57E-05 | 1.64  | Normal up vs > 5 Years Off IS Tolerant   |
| 225519_PM_at   | PPP4R2    | protein phosphatase 4, regulatory subunit 2                                      | 1.61E-05 | 1.70  | Normal up vs > 5 Years Off IS Tolerant   |
| 226635_PM_at   | LOC401504 | hypothetical LOC401504                                                           | 1.62E-05 | 1.68  | Normal up vs > 5 Years Off IS Tolerant   |
| 211282_PM_x_at | TNFRSF25  | tumor necrosis factor receptor superfamily, member 25                            | 1.64E-05 | 3.09  | Normal up vs > 5 Years Off IS Tolerant   |
| 209398_PM_at   | HIST1H1C  | histone cluster 1, H1c                                                           | 1.64E-05 | 2.61  | Normal up vs > 5 Years Off IS Tolerant   |
| 244845_PM_at   | ---       | ---                                                                              | 1.65E-05 | 2.71  | Normal up vs > 5 Years Off IS Tolerant   |



|                 |           |                                                                                |          |       |                                          |
|-----------------|-----------|--------------------------------------------------------------------------------|----------|-------|------------------------------------------|
| 226586_PM_at    | ANKS6     | ankyrin repeat and sterile alpha motif domain containing 6                     | 1.66E-05 | 1.69  | Normal up vs > 5 Years Off IS Tolerant   |
| 240365_PM_at    | LOC647946 | hypothetical LOC647946                                                         | 1.66E-05 | -1.64 | Normal down vs > 5 Years Off IS Tolerant |
| 221606_PM_s_at  | HMG5      | high-mobility group nucleosome binding domain 5                                | 1.66E-05 | 1.77  | Normal up vs > 5 Years Off IS Tolerant   |
| 202746_PM_at    | ITM2A     | integral membrane protein 2A                                                   | 1.67E-05 | 4.09  | Normal up vs > 5 Years Off IS Tolerant   |
| 230612_PM_at    | WDR73     | WD repeat domain 73                                                            | 1.68E-05 | 1.77  | Normal up vs > 5 Years Off IS Tolerant   |
| 1555960_PM_at   | HINT1     | histidine triad nucleotide binding protein 1                                   | 1.68E-05 | 2.51  | Normal up vs > 5 Years Off IS Tolerant   |
| 238910_PM_at    | ---       | ---                                                                            | 1.71E-05 | 2.45  | Normal up vs > 5 Years Off IS Tolerant   |
| 211983_PM_x_at  | ACTG1     | actin, gamma 1                                                                 | 1.71E-05 | -1.17 | Normal down vs > 5 Years Off IS Tolerant |
| 213039_PM_at    | ARHGEF18  | Rho/Rac guanine nucleotide exchange factor (GEF) 18                            | 1.75E-05 | 1.56  | Normal up vs > 5 Years Off IS Tolerant   |
| 242860_PM_at    | ---       | ---                                                                            | 1.76E-05 | -1.64 | Normal down vs > 5 Years Off IS Tolerant |
| 215567_PM_at    | FCF1      | FCF1 small subunit (SSU) processome component homolog ( <i>S. cerevisiae</i> ) | 1.76E-05 | 2.12  | Normal up vs > 5 Years Off IS Tolerant   |
| 214999_PM_s_at  | RAB11FIP3 | RAB11 family interacting protein 3 (class II)                                  | 1.77E-05 | 1.50  | Normal up vs > 5 Years Off IS Tolerant   |
| 212821_PM_at    | PLEKHG3   | pleckstrin homology domain containing, family G (with RhoGef domain) member 3  | 1.79E-05 | -1.78 | Normal down vs > 5 Years Off IS Tolerant |
| 244844_PM_at    | MRS2      | MRS2 magnesium homeostasis factor homolog ( <i>S. cerevisiae</i> )             | 1.79E-05 | -1.73 | Normal down vs > 5 Years Off IS Tolerant |
| 1552634_PM_a_at | ZNF101    | zinc finger protein 101                                                        | 1.79E-05 | 3.04  | Normal up vs > 5 Years Off IS Tolerant   |
| 214749_PM_s_at  | ARMCX6    | armadillo repeat containing, X-linked 6                                        | 1.81E-05 | 1.40  | Normal up vs > 5 Years Off IS Tolerant   |
| 226787_PM_at    | ZNF18     | zinc finger protein 18                                                         | 1.82E-05 | 1.49  | Normal up vs > 5 Years Off IS Tolerant   |
| 207625_PM_s_at  | CBFA2T2   | core-binding factor, runt domain, alpha subunit 2; translocated to, 2          | 1.82E-05 | 1.80  | Normal up vs > 5 Years Off IS Tolerant   |
| 1554229_PM_at   | C5orf41   | chromosome 5 open reading frame 41                                             | 1.85E-05 | 3.09  | Normal up vs > 5 Years Off IS Tolerant   |

|                 |              |                                                                            |          |       |                                          |
|-----------------|--------------|----------------------------------------------------------------------------|----------|-------|------------------------------------------|
| 212069_PM_s_at  | BAT2L1       | HLA-B associated transcript 2-like 1                                       | 1.88E-05 | 2.05  | Normal up vs > 5 Years Off IS Tolerant   |
| 222317_PM_at    | PDE3B        | phosphodiesterase 3B, cGMP-inhibited                                       | 1.88E-05 | 3.73  | Normal up vs > 5 Years Off IS Tolerant   |
| 1554678_PM_s_at | HNRPDL       | heterogeneous nuclear ribonucleoprotein D-like                             | 1.89E-05 | 1.76  | Normal up vs > 5 Years Off IS Tolerant   |
| 1555865_PM_at   | LOC255512    | hypothetical LOC255512                                                     | 1.90E-05 | 1.62  | Normal up vs > 5 Years Off IS Tolerant   |
| 212076_PM_at    | MLL          | myeloid/lymphoid or mixed-lineage leukemia (trithorax homolog, Drosophila) | 1.92E-05 | 1.89  | Normal up vs > 5 Years Off IS Tolerant   |
| 209447_PM_at    | SYNE1        | spectrin repeat containing, nuclear envelope 1                             | 1.93E-05 | 1.99  | Normal up vs > 5 Years Off IS Tolerant   |
| 205353_PM_s_at  | PEBP1        | phosphatidylethanolamine binding protein 1                                 | 1.93E-05 | 1.73  | Normal up vs > 5 Years Off IS Tolerant   |
| 217521_PM_at    | ---          | ---                                                                        | 1.95E-05 | -2.53 | Normal down vs > 5 Years Off IS Tolerant |
| 224847_PM_at    | CDK6         | cyclin-dependent kinase 6                                                  | 1.97E-05 | 2.18  | Normal up vs > 5 Years Off IS Tolerant   |
| 225783_PM_at    | UBE2F        | ubiquitin-conjugating enzyme E2F (putative)                                | 1.98E-05 | 1.95  | Normal up vs > 5 Years Off IS Tolerant   |
| 226869_PM_at    | MEGF6        | multiple EGF-like-domains 6                                                | 1.99E-05 | 2.45  | Normal up vs > 5 Years Off IS Tolerant   |
| 203647_PM_s_at  | FDX1         | ferredoxin 1                                                               | 2.02E-05 | 2.13  | Normal up vs > 5 Years Off IS Tolerant   |
| 229116_PM_at    | CNKSR2       | connector enhancer of kinase suppressor of Ras 2                           | 2.03E-05 | 3.08  | Normal up vs > 5 Years Off IS Tolerant   |
| 239893_PM_at    | ---          | ---                                                                        | 2.03E-05 | 2.61  | Normal up vs > 5 Years Off IS Tolerant   |
| 225698_PM_at    | NCRNA00219   | non-protein coding RNA 219                                                 | 2.04E-05 | 1.75  | Normal up vs > 5 Years Off IS Tolerant   |
| 227252_PM_at    | LRP10        | low density lipoprotein receptor-related protein 10                        | 2.04E-05 | 2.03  | Normal up vs > 5 Years Off IS Tolerant   |
| 226240_PM_at    | TADA2B       | transcriptional adaptor 2B                                                 | 2.05E-05 | 1.96  | Normal up vs > 5 Years Off IS Tolerant   |
| 238093_PM_at    | LOC100129722 | hypothetical LOC100129722                                                  | 2.07E-05 | -1.40 | Normal down vs > 5 Years Off IS Tolerant |
| 203600_PM_s_at  | FAM193A      | family with sequence similarity 193, member A                              | 2.07E-05 | 1.68  | Normal up vs > 5 Years Off IS Tolerant   |

|                |          |                                                                         |          |       |                                          |
|----------------|----------|-------------------------------------------------------------------------|----------|-------|------------------------------------------|
| 228423_PM_at   | MAP9     | microtubule-associated protein 9                                        | 2.08E-05 | 2.43  | Normal up vs > 5 Years Off IS Tolerant   |
| 227521_PM_at   | FBXO33   | F-box protein 33                                                        | 2.08E-05 | 2.35  | Normal up vs > 5 Years Off IS Tolerant   |
| 238050_PM_at   | ANTXR2   | anthrax toxin receptor 2                                                | 2.10E-05 | -1.73 | Normal down vs > 5 Years Off IS Tolerant |
| 227795_PM_at   | NDUFV1   | NADH dehydrogenase (ubiquinone) flavoprotein 1, 51kDa                   | 2.15E-05 | -1.57 | Normal down vs > 5 Years Off IS Tolerant |
| 222995_PM_s_at | RHBDD2   | rhomboid domain containing 2                                            | 2.17E-05 | 2.06  | Normal up vs > 5 Years Off IS Tolerant   |
| 202541_PM_at   | AIMP1    | aminoacyl tRNA synthetase complex-interacting multifunctional protein 1 | 2.17E-05 | 1.97  | Normal up vs > 5 Years Off IS Tolerant   |
| 240102_PM_at   | ---      | ---                                                                     | 2.18E-05 | 2.63  | Normal up vs > 5 Years Off IS Tolerant   |
| 202439_PM_s_at | IDS      | iduronate 2-sulfatase                                                   | 2.20E-05 | 2.13  | Normal up vs > 5 Years Off IS Tolerant   |
| 217058_PM_at   | GNAS     | GNAS complex locus                                                      | 2.22E-05 | -1.59 | Normal down vs > 5 Years Off IS Tolerant |
| 212539_PM_at   | CHD1L    | chromodomain helicase DNA binding protein 1-like                        | 2.22E-05 | 1.34  | Normal up vs > 5 Years Off IS Tolerant   |
| 209388_PM_at   | PAPOLA   | poly(A) polymerase alpha                                                | 2.23E-05 | 1.89  | Normal up vs > 5 Years Off IS Tolerant   |
| 202420_PM_s_at | DHX9     | DEAH (Asp-Glu-Ala-His) box polypeptide 9                                | 2.23E-05 | 1.45  | Normal up vs > 5 Years Off IS Tolerant   |
| 209337_PM_at   | PSIP1    | PC4 and SFRS1 interacting protein 1                                     | 2.25E-05 | 1.93  | Normal up vs > 5 Years Off IS Tolerant   |
| 227450_PM_at   | ERP27    | endoplasmic reticulum protein 27                                        | 2.25E-05 | 1.95  | Normal up vs > 5 Years Off IS Tolerant   |
| 212411_PM_at   | IMP4     | IMP4, U3 small nucleolar ribonucleoprotein, homolog (yeast)             | 2.30E-05 | 1.46  | Normal up vs > 5 Years Off IS Tolerant   |
| 218016_PM_s_at | POLR3E   | polymerase (RNA) III (DNA directed) polypeptide E (80kD)                | 2.31E-05 | 1.99  | Normal up vs > 5 Years Off IS Tolerant   |
| 224810_PM_s_at | ANKRD13A | ankyrin repeat domain 13A                                               | 2.31E-05 | 1.23  | Normal up vs > 5 Years Off IS Tolerant   |
| 225879_PM_at   | TSEN54   | tRNA splicing endonuclease 54 homolog ( <i>S. cerevisiae</i> )          | 2.33E-05 | 2.19  | Normal up vs > 5 Years Off IS Tolerant   |
| 222326_PM_at   | ---      | ---                                                                     | 2.34E-05 | 5.25  | Normal up vs > 5 Years Off IS Tolerant   |

|                 |                       |                                                                 |          |       |                                          |
|-----------------|-----------------------|-----------------------------------------------------------------|----------|-------|------------------------------------------|
| 208322_PM_s_at  | ST3GAL1               | ST3 beta-galactoside alpha-2,3-sialyltransferase 1              | 2.34E-05 | 1.54  | Normal up vs > 5 Years Off IS Tolerant   |
| 202304_PM_at    | FNDC3A                | fibronectin type III domain containing 3A                       | 2.36E-05 | 2.03  | Normal up vs > 5 Years Off IS Tolerant   |
| 212548_PM_s_at  | FRYL                  | FRY-like                                                        | 2.38E-05 | 1.43  | Normal up vs > 5 Years Off IS Tolerant   |
| 232284_PM_at    | PSMD6                 | Proteasome (prosome, macropain) 26S subunit, non-ATPase, 6      | 2.40E-05 | 2.60  | Normal up vs > 5 Years Off IS Tolerant   |
| 212660_PM_at    | PHF15                 | PHD finger protein 15                                           | 2.42E-05 | 2.31  | Normal up vs > 5 Years Off IS Tolerant   |
| 1560559_PM_at   | ---                   | ---                                                             | 2.42E-05 | -1.65 | Normal down vs > 5 Years Off IS Tolerant |
| 214039_PM_s_at  | LAPTM4B               | lysosomal protein transmembrane 4 beta                          | 2.43E-05 | 2.48  | Normal up vs > 5 Years Off IS Tolerant   |
| 221503_PM_s_at  | KPNA3                 | karyopherin alpha 3 (importin alpha 4)                          | 2.43E-05 | 1.76  | Normal up vs > 5 Years Off IS Tolerant   |
| 229872_PM_s_at  | LOC100132999          | hypothetical LOC100132999                                       | 2.44E-05 | 1.95  | Normal up vs > 5 Years Off IS Tolerant   |
| 212622_PM_at    | TMEM41B               | transmembrane protein 41B                                       | 2.44E-05 | 1.69  | Normal up vs > 5 Years Off IS Tolerant   |
| 221235_PM_s_at  | TGFBRAP1              | transforming growth factor, beta receptor associated protein 1  | 2.46E-05 | 1.74  | Normal up vs > 5 Years Off IS Tolerant   |
| 229083_PM_at    | ---                   | ---                                                             | 2.46E-05 | 2.10  | Normal up vs > 5 Years Off IS Tolerant   |
| 218696_PM_at    | EIF2AK3               | eukaryotic translation initiation factor 2-alpha kinase 3       | 2.46E-05 | 2.37  | Normal up vs > 5 Years Off IS Tolerant   |
| 228012_PM_at    | MATR3                 | matrin 3                                                        | 2.47E-05 | 1.83  | Normal up vs > 5 Years Off IS Tolerant   |
| 218569_PM_s_at  | KBTBD4                | kelch repeat and BTB (POZ) domain containing 4                  | 2.52E-05 | 2.48  | Normal up vs > 5 Years Off IS Tolerant   |
| 242132_PM_x_at  | ---                   | ---                                                             | 2.53E-05 | -1.36 | Normal down vs > 5 Years Off IS Tolerant |
| 213360_PM_s_at  | POM121 ///<br>POM121C | POM121 membrane glycoprotein /// POM121 membrane glycoprotein C | 2.57E-05 | 1.29  | Normal up vs > 5 Years Off IS Tolerant   |
| 1556034_PM_s_at | MTMR11                | myotubularin related protein 11                                 | 2.57E-05 | -1.93 | Normal down vs > 5 Years Off IS Tolerant |
| 213666_PM_at    | 6-Sep                 | septin 6                                                        | 2.57E-05 | 2.09  | Normal up vs > 5 Years Off IS Tolerant   |

|                |          |                                                                                         |          |       |                                          |
|----------------|----------|-----------------------------------------------------------------------------------------|----------|-------|------------------------------------------|
| 213598_PM_at   | ---      | ---                                                                                     | 2.58E-05 | 2.13  | Normal up vs > 5 Years Off IS Tolerant   |
| 241446_PM_at   | ADAM28   | ADAM metallopeptidase domain 28                                                         | 2.59E-05 | -1.45 | Normal down vs > 5 Years Off IS Tolerant |
| 1558369_PM_at  | MPHOSPH9 | M-phase phosphoprotein 9                                                                | 2.61E-05 | 2.38  | Normal up vs > 5 Years Off IS Tolerant   |
| 240746_PM_s_at | ---      | ---                                                                                     | 2.64E-05 | -1.50 | Normal down vs > 5 Years Off IS Tolerant |
| 217883_PM_at   | MMADHC   | methylmalonic aciduria (cobalamin deficiency) cblD type, with homocystinuria            | 2.65E-05 | 1.45  | Normal up vs > 5 Years Off IS Tolerant   |
| 221645_PM_s_at | ZNF83    | zinc finger protein 83                                                                  | 2.68E-05 | 2.18  | Normal up vs > 5 Years Off IS Tolerant   |
| 212485_PM_at   | GPATCH8  | G patch domain containing 8                                                             | 2.69E-05 | 1.57  | Normal up vs > 5 Years Off IS Tolerant   |
| 239212_PM_at   | LTV1     | LTV1 homolog (S. cerevisiae)                                                            | 2.70E-05 | 2.03  | Normal up vs > 5 Years Off IS Tolerant   |
| 212259_PM_s_at | PBXIP1   | pre-B-cell leukemia homeobox interacting protein 1                                      | 2.70E-05 | 2.12  | Normal up vs > 5 Years Off IS Tolerant   |
| 203519_PM_s_at | UPF2     | UPF2 regulator of nonsense transcripts homolog (yeast)                                  | 2.70E-05 | 1.60  | Normal up vs > 5 Years Off IS Tolerant   |
| 229231_PM_at   | LRR37B   | leucine rich repeat containing 37B                                                      | 2.74E-05 | 1.69  | Normal up vs > 5 Years Off IS Tolerant   |
| 227814_PM_at   | WDR53    | WD repeat domain 53                                                                     | 2.77E-05 | 1.53  | Normal up vs > 5 Years Off IS Tolerant   |
| 240806_PM_at   | RPL15    | Ribosomal protein L15                                                                   | 2.77E-05 | 2.40  | Normal up vs > 5 Years Off IS Tolerant   |
| 229838_PM_at   | NUCB2    | nucleobindin 2                                                                          | 2.78E-05 | 2.34  | Normal up vs > 5 Years Off IS Tolerant   |
| 213208_PM_at   | KIAA0240 | KIAA0240                                                                                | 2.78E-05 | 1.86  | Normal up vs > 5 Years Off IS Tolerant   |
| 227638_PM_at   | KIAA1632 | KIAA1632                                                                                | 2.79E-05 | 1.67  | Normal up vs > 5 Years Off IS Tolerant   |
| 209282_PM_at   | PRKD2    | protein kinase D2                                                                       | 2.79E-05 | 1.81  | Normal up vs > 5 Years Off IS Tolerant   |
| 223450_PM_s_at | COG3     | component of oligomeric golgi complex 3                                                 | 2.82E-05 | 1.56  | Normal up vs > 5 Years Off IS Tolerant   |
| 227491_PM_at   | ELOVL6   | ELOVL family member 6, elongation of long chain fatty acids (FEN1/Elo2, SUR4/Elo3-like, | 2.82E-05 | 1.56  | Normal up vs > 5 Years Off IS Tolerant   |

|                 |           |                                                                           |          |       |                                          |
|-----------------|-----------|---------------------------------------------------------------------------|----------|-------|------------------------------------------|
| 211339_PM_s_at  | ITK       | IL2-inducible T-cell kinase                                               | 2.86E-05 | 3.19  | Normal up vs > 5 Years Off IS Tolerant   |
| 230616_PM_at    | LAMB2P1   | laminin, beta 2 pseudogene 1                                              | 2.89E-05 | 1.77  | Normal up vs > 5 Years Off IS Tolerant   |
| 204197_PM_s_at  | RUNX3     | runt-related transcription factor 3                                       | 2.92E-05 | 2.15  | Normal up vs > 5 Years Off IS Tolerant   |
| 240139_PM_at    | ---       | ---                                                                       | 2.92E-05 | 2.09  | Normal up vs > 5 Years Off IS Tolerant   |
| 221842_PM_s_at  | ZNF131    | zinc finger protein 131                                                   | 2.92E-05 | 1.58  | Normal up vs > 5 Years Off IS Tolerant   |
| 239063_PM_at    | ---       | ---                                                                       | 2.93E-05 | 1.66  | Normal up vs > 5 Years Off IS Tolerant   |
| 229903_PM_x_at  | RNPC3     | RNA-binding region (RNP1, RRM) containing 3                               | 2.94E-05 | -1.72 | Normal down vs > 5 Years Off IS Tolerant |
| 212549_PM_at    | STAT5B    | signal transducer and activator of transcription 5B                       | 2.95E-05 | 1.52  | Normal up vs > 5 Years Off IS Tolerant   |
| 1569110_PM_x_at | LOC728613 | programmed cell death 6 pseudogene                                        | 2.98E-05 | 4.45  | Normal up vs > 5 Years Off IS Tolerant   |
| 226735_PM_at    | TAPT1     | transmembrane anterior posterior transformation 1                         | 2.99E-05 | 2.05  | Normal up vs > 5 Years Off IS Tolerant   |
| 225172_PM_at    | CRAMP1L   | Crm, cramped-like (Drosophila)                                            | 3.00E-05 | 1.87  | Normal up vs > 5 Years Off IS Tolerant   |
| 235099_PM_at    | CMTM8     | CKLF-like MARVEL transmembrane domain containing 8                        | 3.00E-05 | 2.00  | Normal up vs > 5 Years Off IS Tolerant   |
| 227852_PM_at    | RP9       | retinitis pigmentosa 9 (autosomal dominant)                               | 3.03E-05 | 1.95  | Normal up vs > 5 Years Off IS Tolerant   |
| 222034_PM_at    | GNB2L1    | guanine nucleotide binding protein (G protein), beta polypeptide 2-like 1 | 3.04E-05 | 2.19  | Normal up vs > 5 Years Off IS Tolerant   |
| 218788_PM_s_at  | SMYD3     | SET and MYND domain containing 3                                          | 3.09E-05 | 2.11  | Normal up vs > 5 Years Off IS Tolerant   |
| 212966_PM_at    | HIC2      | hypermethylated in cancer 2                                               | 3.10E-05 | 2.23  | Normal up vs > 5 Years Off IS Tolerant   |
| 212742_PM_at    | RNF115    | ring finger protein 115                                                   | 3.11E-05 | 1.66  | Normal up vs > 5 Years Off IS Tolerant   |
| 211521_PM_s_at  | CYTH4     | cytohesin 4                                                               | 3.12E-05 | -1.77 | Normal down vs > 5 Years Off IS Tolerant |
| 225197_PM_at    | ---       | ---                                                                       | 3.13E-05 | 1.63  | Normal up vs > 5 Years Off IS Tolerant   |

|                |          |                                                                                                 |          |       |                                          |
|----------------|----------|-------------------------------------------------------------------------------------------------|----------|-------|------------------------------------------|
| 216154_PM_at   | ---      | ---                                                                                             | 3.15E-05 | -1.97 | Normal down vs > 5 Years Off IS Tolerant |
| 205510_PM_s_at | FLJ10038 | hypothetical protein FLJ10038                                                                   | 3.17E-05 | 1.75  | Normal up vs > 5 Years Off IS Tolerant   |
| 227844_PM_at   | FMNL3    | formin-like 3                                                                                   | 3.17E-05 | 1.75  | Normal up vs > 5 Years Off IS Tolerant   |
| 1558111_PM_at  | MBNL1    | muscleblind-like (Drosophila)                                                                   | 3.17E-05 | 1.75  | Normal up vs > 5 Years Off IS Tolerant   |
| 244081_PM_at   | ---      | ---                                                                                             | 3.18E-05 | -1.46 | Normal down vs > 5 Years Off IS Tolerant |
| 235389_PM_at   | PHF20    | PHD finger protein 20                                                                           | 3.18E-05 | 2.00  | Normal up vs > 5 Years Off IS Tolerant   |
| 215503_PM_at   | SPINT3   | serine peptidase inhibitor, Kunitz type, 3                                                      | 3.19E-05 | -1.42 | Normal down vs > 5 Years Off IS Tolerant |
| 224437_PM_s_at | VTA1     | Vps20-associated 1 homolog ( <i>S. cerevisiae</i> )                                             | 3.20E-05 | -1.84 | Normal down vs > 5 Years Off IS Tolerant |
| 211727_PM_s_at | COX11    | COX11 cytochrome c oxidase assembly homolog (yeast)                                             | 3.21E-05 | 1.86  | Normal up vs > 5 Years Off IS Tolerant   |
| 230395_PM_at   | ---      | ---                                                                                             | 3.22E-05 | -1.75 | Normal down vs > 5 Years Off IS Tolerant |
| 222152_PM_at   | PDCD6    | Programmed cell death 6                                                                         | 3.23E-05 | 1.82  | Normal up vs > 5 Years Off IS Tolerant   |
| 237429_PM_at   | ---      | ---                                                                                             | 3.24E-05 | 2.33  | Normal up vs > 5 Years Off IS Tolerant   |
| 200892_PM_s_at | TRA2B    | transformer 2 beta homolog ( <i>Drosophila</i> )                                                | 3.27E-05 | 1.41  | Normal up vs > 5 Years Off IS Tolerant   |
| 214369_PM_s_at | RASGRP2  | RAS guanyl releasing protein 2 (calcium and DAG-regulated)                                      | 3.29E-05 | 1.53  | Normal up vs > 5 Years Off IS Tolerant   |
| 242429_PM_at   | ZNF567   | zinc finger protein 567                                                                         | 3.30E-05 | 2.44  | Normal up vs > 5 Years Off IS Tolerant   |
| 216480_PM_x_at | MLLT10   | Myeloid/lymphoid or mixed-lineage leukemia (trithorax homolog, <i>Drosophila</i> ); translocate | 3.31E-05 | -1.45 | Normal down vs > 5 Years Off IS Tolerant |
| 221991_PM_at   | NXPH3    | neurexophilin 3                                                                                 | 3.31E-05 | -1.65 | Normal down vs > 5 Years Off IS Tolerant |
| 218164_PM_at   | SPATA20  | spermatogenesis associated 20                                                                   | 3.32E-05 | 2.40  | Normal up vs > 5 Years Off IS Tolerant   |
| 232670_PM_at   | ---      | ---                                                                                             | 3.33E-05 | -2.20 | Normal down vs > 5 Years Off IS Tolerant |

|                 |        |                                                                              |          |       |                                          |
|-----------------|--------|------------------------------------------------------------------------------|----------|-------|------------------------------------------|
| 211208_PM_s_at  | CASK   | calcium/calmodulin-dependent serine protein kinase (MAGUK family)            | 3.34E-05 | 1.71  | Normal up vs > 5 Years Off IS Tolerant   |
| 223213_PM_s_at  | ZHX1   | zinc fingers and homeoboxes 1                                                | 3.36E-05 | 1.89  | Normal up vs > 5 Years Off IS Tolerant   |
| 234099_PM_at    | ---    | ---                                                                          | 3.36E-05 | -1.87 | Normal down vs > 5 Years Off IS Tolerant |
| 216857_PM_at    | IL23A  | Interleukin 23, alpha subunit p19                                            | 3.37E-05 | 1.97  | Normal up vs > 5 Years Off IS Tolerant   |
| 209558_PM_s_at  | HIP1R  | huntingtin interacting protein 1 related                                     | 3.39E-05 | 2.48  | Normal up vs > 5 Years Off IS Tolerant   |
| 209153_PM_s_at  | TCF3   | transcription factor 3 (E2A immunoglobulin enhancer binding factors E12/E47) | 3.40E-05 | 1.96  | Normal up vs > 5 Years Off IS Tolerant   |
| 215696_PM_s_at  | SEC16A | SEC16 homolog A ( <i>S. cerevisiae</i> )                                     | 3.40E-05 | 1.51  | Normal up vs > 5 Years Off IS Tolerant   |
| 244795_PM_at    | UQCC   | ubiquinol-cytochrome c reductase complex chaperone                           | 3.42E-05 | -2.15 | Normal down vs > 5 Years Off IS Tolerant |
| 208682_PM_s_at  | MAGED2 | melanoma antigen family D, 2                                                 | 3.43E-05 | 1.77  | Normal up vs > 5 Years Off IS Tolerant   |
| 215038_PM_s_at  | SETD2  | SET domain containing 2                                                      | 3.43E-05 | 1.97  | Normal up vs > 5 Years Off IS Tolerant   |
| 202747_PM_s_at  | ITM2A  | integral membrane protein 2A                                                 | 3.45E-05 | 3.41  | Normal up vs > 5 Years Off IS Tolerant   |
| 212862_PM_at    | CDS2   | CDP-diacylglycerol synthase (phosphatidate cytidyltransferase) 2             | 3.45E-05 | 2.05  | Normal up vs > 5 Years Off IS Tolerant   |
| 1554129_PM_a_at | ADIG   | adipogenin                                                                   | 3.47E-05 | -1.57 | Normal down vs > 5 Years Off IS Tolerant |
| 200944_PM_s_at  | HMGN1  | high-mobility group nucleosome binding domain 1                              | 3.47E-05 | 1.32  | Normal up vs > 5 Years Off IS Tolerant   |
| 211506_PM_s_at  | IL8    | interleukin 8                                                                | 3.48E-05 | 10.59 | Normal up vs > 5 Years Off IS Tolerant   |
| 203845_PM_at    | KAT2B  | K(lysine) acetyltransferase 2B                                               | 3.52E-05 | 1.69  | Normal up vs > 5 Years Off IS Tolerant   |
| 1556451_PM_at   | ---    | ---                                                                          | 3.60E-05 | 3.24  | Normal up vs > 5 Years Off IS Tolerant   |
| 1557297_PM_at   | ---    | ---                                                                          | 3.63E-05 | -1.38 | Normal down vs > 5 Years Off IS Tolerant |
| 210603_PM_at    | NAA11  | N(alpha)-acetyltransferase 11, NatA catalytic subunit                        | 3.63E-05 | -2.38 | Normal down vs > 5 Years Off IS Tolerant |



|                 |         |                                                                                         |          |       |                                          |
|-----------------|---------|-----------------------------------------------------------------------------------------|----------|-------|------------------------------------------|
| 227527_PM_at    | MLL2    | myeloid/lymphoid or mixed-lineage leukemia 2                                            | 3.64E-05 | 1.48  | Normal up vs > 5 Years Off IS Tolerant   |
| 212400_PM_at    | FAM102A | family with sequence similarity 102, member A                                           | 3.65E-05 | 3.05  | Normal up vs > 5 Years Off IS Tolerant   |
| 223247_PM_at    | MED10   | mediator complex subunit 10                                                             | 3.66E-05 | 1.70  | Normal up vs > 5 Years Off IS Tolerant   |
| 209023_PM_s_at  | STAG2   | stromal antigen 2                                                                       | 3.67E-05 | 1.58  | Normal up vs > 5 Years Off IS Tolerant   |
| 225628_PM_s_at  | MLLT6   | myeloid/lymphoid or mixed-lineage leukemia (trithorax homolog, Drosophila); translocate | 3.67E-05 | 1.90  | Normal up vs > 5 Years Off IS Tolerant   |
| 202005_PM_at    | ST14    | suppression of tumorigenicity 14 (colon carcinoma)                                      | 3.75E-05 | -2.26 | Normal down vs > 5 Years Off IS Tolerant |
| 226915_PM_s_at  | ARPC5L  | actin related protein 2/3 complex, subunit 5-like                                       | 3.75E-05 | 1.60  | Normal up vs > 5 Years Off IS Tolerant   |
| 1556541_PM_s_at | ---     | ---                                                                                     | 3.80E-05 | -1.57 | Normal down vs > 5 Years Off IS Tolerant |
| 227412_PM_at    | PPP1R3E | protein phosphatase 1, regulatory (inhibitor) subunit 3E                                | 3.81E-05 | 2.67  | Normal up vs > 5 Years Off IS Tolerant   |
| 201457_PM_x_at  | BUB3    | budding uninhibited by benzimidazoles 3 homolog (yeast)                                 | 3.81E-05 | 1.60  | Normal up vs > 5 Years Off IS Tolerant   |
| 240644_PM_at    | ---     | ---                                                                                     | 3.85E-05 | -1.44 | Normal down vs > 5 Years Off IS Tolerant |
| 203353_PM_s_at  | MBD1    | methyl-CpG binding domain protein 1                                                     | 3.87E-05 | 1.47  | Normal up vs > 5 Years Off IS Tolerant   |
| 210555_PM_s_at  | NFATC3  | nuclear factor of activated T-cells, cytoplasmic, calcineurin-dependent 3               | 3.88E-05 | 1.90  | Normal up vs > 5 Years Off IS Tolerant   |
| 226434_PM_at    | C7orf47 | chromosome 7 open reading frame 47                                                      | 3.90E-05 | 1.58  | Normal up vs > 5 Years Off IS Tolerant   |
| 1553254_PM_at   | MAGEE2  | melanoma antigen family E, 2                                                            | 3.91E-05 | -1.33 | Normal down vs > 5 Years Off IS Tolerant |
| 201648_PM_at    | JAK1    | Janus kinase 1                                                                          | 3.94E-05 | 1.35  | Normal up vs > 5 Years Off IS Tolerant   |
| 207974_PM_s_at  | SKP1    | S-phase kinase-associated protein 1                                                     | 3.95E-05 | 1.61  | Normal up vs > 5 Years Off IS Tolerant   |
| 1562926_PM_at   | ---     | ---                                                                                     | 3.95E-05 | -1.43 | Normal down vs > 5 Years Off IS Tolerant |
| 244891_PM_x_at  | ---     | ---                                                                                     | 3.95E-05 | -1.39 | Normal down vs > 5 Years Off IS Tolerant |

|                |          |                                                      |          |       |                                          |
|----------------|----------|------------------------------------------------------|----------|-------|------------------------------------------|
| 238389_PM_s_at | ---      | ---                                                  | 3.99E-05 | 3.38  | Normal up vs > 5 Years Off IS Tolerant   |
| 232483_PM_at   | MED17    | mediator complex subunit 17                          | 4.01E-05 | 2.40  | Normal up vs > 5 Years Off IS Tolerant   |
| 213145_PM_at   | FBXL14   | F-box and leucine-rich repeat protein 14             | 4.04E-05 | 1.66  | Normal up vs > 5 Years Off IS Tolerant   |
| 225821_PM_s_at | BOD1L    | biorientation of chromosomes in cell division 1-like | 4.06E-05 | 1.32  | Normal up vs > 5 Years Off IS Tolerant   |
| 218958_PM_at   | C19orf60 | chromosome 19 open reading frame 60                  | 4.06E-05 | 1.54  | Normal up vs > 5 Years Off IS Tolerant   |
| 225649_PM_s_at | STK35    | serine/threonine kinase 35                           | 4.07E-05 | 1.86  | Normal up vs > 5 Years Off IS Tolerant   |
| 1567288_PM_at  | OR5K1    | olfactory receptor, family 5, subfamily K, member 1  | 4.07E-05 | -1.45 | Normal down vs > 5 Years Off IS Tolerant |
| 215785_PM_s_at | CYFIP2   | cytoplasmic FMR1 interacting protein 2               | 4.08E-05 | 1.59  | Normal up vs > 5 Years Off IS Tolerant   |
| 204861_PM_s_at | NAIP     | NLR family, apoptosis inhibitory protein             | 4.09E-05 | -2.29 | Normal down vs > 5 Years Off IS Tolerant |
| 238346_PM_s_at | TGS1     | trimethylguanosine synthase 1                        | 4.11E-05 | 1.79  | Normal up vs > 5 Years Off IS Tolerant   |
| 224797_PM_at   | ARRDC3   | arrestin domain containing 3                         | 4.11E-05 | 2.05  | Normal up vs > 5 Years Off IS Tolerant   |
| 208598_PM_s_at | HUWE1    | HECT, UBA and WWE domain containing 1                | 4.15E-05 | 1.36  | Normal up vs > 5 Years Off IS Tolerant   |
| 1565729_PM_at  | ---      | ---                                                  | 4.15E-05 | -1.41 | Normal down vs > 5 Years Off IS Tolerant |
| 235291_PM_s_at | FLJ32255 | hypothetical LOC643977                               | 4.18E-05 | 2.69  | Normal up vs > 5 Years Off IS Tolerant   |
| 207230_PM_at   | CDON     | Cdon homolog (mouse)                                 | 4.19E-05 | -1.51 | Normal down vs > 5 Years Off IS Tolerant |
| 215961_PM_at   | F12      | coagulation factor XII (Hageman factor)              | 4.19E-05 | -1.62 | Normal down vs > 5 Years Off IS Tolerant |
| 213243_PM_at   | VPS13B   | vacuolar protein sorting 13 homolog B (yeast)        | 4.19E-05 | 2.05  | Normal up vs > 5 Years Off IS Tolerant   |
| 207001_PM_x_at | TSC22D3  | TSC22 domain family, member 3                        | 4.20E-05 | 2.15  | Normal up vs > 5 Years Off IS Tolerant   |
| 224502_PM_s_at | KIAA1191 | KIAA1191                                             | 4.21E-05 | 1.51  | Normal up vs > 5 Years Off IS Tolerant   |

|                 |                        |                                                                            |          |       |                                          |
|-----------------|------------------------|----------------------------------------------------------------------------|----------|-------|------------------------------------------|
| 1562443_PM_at   | CLVS2                  | clavesin 2                                                                 | 4.22E-05 | -1.50 | Normal down vs > 5 Years Off IS Tolerant |
| 214741_PM_at    | ZNF131                 | zinc finger protein 131                                                    | 4.26E-05 | 2.50  | Normal up vs > 5 Years Off IS Tolerant   |
| 222593_PM_s_at  | SPATS2                 | spermatogenesis associated, serine-rich 2                                  | 4.30E-05 | 2.08  | Normal up vs > 5 Years Off IS Tolerant   |
| 236013_PM_at    | CACNA1E                | calcium channel, voltage-dependent, R type, alpha 1E subunit               | 4.31E-05 | -1.46 | Normal down vs > 5 Years Off IS Tolerant |
| 240052_PM_at    | ITPR1                  | inositol 1,4,5-triphosphate receptor, type 1                               | 4.31E-05 | 2.22  | Normal up vs > 5 Years Off IS Tolerant   |
| 212579_PM_at    | SMCHD1                 | structural maintenance of chromosomes flexible hinge domain containing 1   | 4.32E-05 | 1.57  | Normal up vs > 5 Years Off IS Tolerant   |
| 209075_PM_s_at  | ISCU                   | iron-sulfur cluster scaffold homolog (E. coli)                             | 4.32E-05 | 1.43  | Normal up vs > 5 Years Off IS Tolerant   |
| 212247_PM_at    | NUP205                 | nucleoporin 205kDa                                                         | 4.33E-05 | 1.47  | Normal up vs > 5 Years Off IS Tolerant   |
| 216383_PM_at    | RPL18A ///<br>RPL18AP3 | ribosomal protein L18a /// ribosomal protein L18a pseudogene 3             | 4.33E-05 | 1.84  | Normal up vs > 5 Years Off IS Tolerant   |
| 229820_PM_at    | LOC440993              | hypothetical LOC440993                                                     | 4.33E-05 | 2.48  | Normal up vs > 5 Years Off IS Tolerant   |
| 226318_PM_at    | TBRG1                  | transforming growth factor beta regulator 1                                | 4.39E-05 | 1.45  | Normal up vs > 5 Years Off IS Tolerant   |
| 244110_PM_at    | MLL                    | Myeloid/lymphoid or mixed-lineage leukemia (trithorax homolog, Drosophila) | 4.40E-05 | 1.89  | Normal up vs > 5 Years Off IS Tolerant   |
| 1564838_PM_a_at | LOC151760              | hypothetical LOC151760                                                     | 4.41E-05 | -1.56 | Normal down vs > 5 Years Off IS Tolerant |
| 203408_PM_s_at  | SATB1                  | SATB homeobox 1                                                            | 4.41E-05 | 1.86  | Normal up vs > 5 Years Off IS Tolerant   |
| 227783_PM_at    | CCDC57                 | coiled-coil domain containing 57                                           | 4.44E-05 | 1.42  | Normal up vs > 5 Years Off IS Tolerant   |
| 234692_PM_at    | ---                    | ---                                                                        | 4.47E-05 | -1.57 | Normal down vs > 5 Years Off IS Tolerant |
| 239619_PM_at    | ---                    | ---                                                                        | 4.48E-05 | 2.84  | Normal up vs > 5 Years Off IS Tolerant   |
| 235005_PM_at    | DIS3L                  | DIS3 mitotic control homolog (S. cerevisiae)-like                          | 4.49E-05 | 1.84  | Normal up vs > 5 Years Off IS Tolerant   |
| 238247_PM_at    | LOC100506942           | hypothetical LOC100506942                                                  | 4.51E-05 | -1.39 | Normal down vs > 5 Years Off IS Tolerant |

|                 |          |                                                                                         |          |       |                                          |
|-----------------|----------|-----------------------------------------------------------------------------------------|----------|-------|------------------------------------------|
| 200933_PM_x_at  | RPS4X    | ribosomal protein S4, X-linked                                                          | 4.51E-05 | 1.25  | Normal up vs > 5 Years Off IS Tolerant   |
| 214139_PM_at    | ARID4B   | AT rich interactive domain 4B (RBP1-like)                                               | 4.53E-05 | -1.52 | Normal down vs > 5 Years Off IS Tolerant |
| 227580_PM_s_at  | TECPR1   | tectonin beta-propeller repeat containing 1                                             | 4.54E-05 | 1.54  | Normal up vs > 5 Years Off IS Tolerant   |
| 235045_PM_at    | RBM7     | RNA binding motif protein 7                                                             | 4.55E-05 | 1.71  | Normal up vs > 5 Years Off IS Tolerant   |
| 1554014_PM_at   | CHD2     | chromodomain helicase DNA binding protein 2                                             | 4.55E-05 | 1.97  | Normal up vs > 5 Years Off IS Tolerant   |
| 202690_PM_s_at  | SNRPD1   | small nuclear ribonucleoprotein D1 polypeptide 16kDa                                    | 4.56E-05 | 1.88  | Normal up vs > 5 Years Off IS Tolerant   |
| 227188_PM_at    | C21orf63 | chromosome 21 open reading frame 63                                                     | 4.57E-05 | 1.68  | Normal up vs > 5 Years Off IS Tolerant   |
| 238016_PM_s_at  | ---      | ---                                                                                     | 4.58E-05 | -1.48 | Normal down vs > 5 Years Off IS Tolerant |
| 241163_PM_at    | ---      | ---                                                                                     | 4.59E-05 | -1.53 | Normal down vs > 5 Years Off IS Tolerant |
| 1555613_PM_a_at | ZAP70    | zeta-chain (TCR) associated protein kinase 70kDa                                        | 4.61E-05 | 2.76  | Normal up vs > 5 Years Off IS Tolerant   |
| 204588_PM_s_at  | SLC7A7   | solute carrier family 7 (cationic amino acid transporter, y+ system), member 7          | 4.61E-05 | -1.69 | Normal down vs > 5 Years Off IS Tolerant |
| 206003_PM_at    | CEP135   | centrosomal protein 135kDa                                                              | 4.62E-05 | 1.60  | Normal up vs > 5 Years Off IS Tolerant   |
| 219013_PM_at    | GALNT11  | UDP-N-acetyl-alpha-D-galactosamine:polypeptide N-acetylgalactosaminyltransferase 11 (Ga | 4.67E-05 | 1.73  | Normal up vs > 5 Years Off IS Tolerant   |
| 223875_PM_s_at  | EPC1     | enhancer of polycomb homolog 1 (Drosophila)                                             | 4.67E-05 | 1.76  | Normal up vs > 5 Years Off IS Tolerant   |
| 206134_PM_at    | ADAMDEC1 | ADAM-like, decysin 1                                                                    | 4.68E-05 | -1.88 | Normal down vs > 5 Years Off IS Tolerant |
| 225117_PM_at    | KIAA1267 | KIAA1267                                                                                | 4.68E-05 | 1.46  | Normal up vs > 5 Years Off IS Tolerant   |
| 209724_PM_s_at  | ZFP161   | zinc finger protein 161 homolog (mouse)                                                 | 4.74E-05 | 1.74  | Normal up vs > 5 Years Off IS Tolerant   |
| 212946_PM_at    | KIAA0564 | KIAA0564                                                                                | 4.76E-05 | 1.89  | Normal up vs > 5 Years Off IS Tolerant   |
| 227263_PM_at    | C8orf58  | chromosome 8 open reading frame 58                                                      | 4.76E-05 | 1.73  | Normal up vs > 5 Years Off IS Tolerant   |

|                 |                   |                                                                                         |          |       |                                          |
|-----------------|-------------------|-----------------------------------------------------------------------------------------|----------|-------|------------------------------------------|
| 241010_PM_x_at  | ---               | ---                                                                                     | 4.76E-05 | -1.73 | Normal down vs > 5 Years Off IS Tolerant |
| 231169_PM_at    | ---               | ---                                                                                     | 4.78E-05 | 2.08  | Normal up vs > 5 Years Off IS Tolerant   |
| 222482_PM_at    | SSBP3             | single stranded DNA binding protein 3                                                   | 4.79E-05 | 1.98  | Normal up vs > 5 Years Off IS Tolerant   |
| 228664_PM_at    | LOC100507602      | hypothetical LOC100507602                                                               | 4.81E-05 | 1.87  | Normal up vs > 5 Years Off IS Tolerant   |
| 235038_PM_at    | KRR1              | KRR1, small subunit (SSU) processome component, homolog (yeast)                         | 4.85E-05 | 1.69  | Normal up vs > 5 Years Off IS Tolerant   |
| 207391_PM_s_at  | PIP5K1A           | phosphatidylinositol-4-phosphate 5-kinase, type I, alpha                                | 4.91E-05 | -1.92 | Normal down vs > 5 Years Off IS Tolerant |
| 224327_PM_s_at  | DGAT2             | diacylglycerol O-acyltransferase 2                                                      | 4.93E-05 | -2.05 | Normal down vs > 5 Years Off IS Tolerant |
| 202730_PM_s_at  | PDCD4             | programmed cell death 4 (neoplastic transformation inhibitor)                           | 4.93E-05 | 1.70  | Normal up vs > 5 Years Off IS Tolerant   |
| 244730_PM_x_at  | LOC100129195      | hypothetical LOC100129195                                                               | 4.93E-05 | -1.48 | Normal down vs > 5 Years Off IS Tolerant |
| 206884_PM_s_at  | SCEL              | sciellin                                                                                | 4.97E-05 | -1.66 | Normal down vs > 5 Years Off IS Tolerant |
| 39248_PM_at     | AQP3              | aquaporin 3 (Gill blood group)                                                          | 4.98E-05 | 3.10  | Normal up vs > 5 Years Off IS Tolerant   |
| 202968_PM_s_at  | DYRK2             | dual-specificity tyrosine-(Y)-phosphorylation regulated kinase 2                        | 5.00E-05 | 2.10  | Normal up vs > 5 Years Off IS Tolerant   |
| 1568896_PM_at   | STXBP5L           | syntaxin binding protein 5-like                                                         | 5.01E-05 | -2.61 | Normal down vs > 5 Years Off IS Tolerant |
| 1559975_PM_at   | BTG1              | B-cell translocation gene 1, anti-proliferative                                         | 5.02E-05 | 3.76  | Normal up vs > 5 Years Off IS Tolerant   |
| 1560087_PM_a_at | ---               | ---                                                                                     | 5.05E-05 | -1.81 | Normal down vs > 5 Years Off IS Tolerant |
| 242136_PM_x_at  | MGC70870          | C-terminal binding protein 2 pseudogene                                                 | 5.09E-05 | -1.92 | Normal down vs > 5 Years Off IS Tolerant |
| 236313_PM_at    | CDKN2B            | cyclin-dependent kinase inhibitor 2B (p15, inhibits CDK4)                               | 5.09E-05 | -1.63 | Normal down vs > 5 Years Off IS Tolerant |
| 218570_PM_at    | KBTBD4 /// PTPMT1 | kelch repeat and BTB (POZ) domain containing 4 /// protein tyrosine phosphatase, mitoch | 5.09E-05 | 2.09  | Normal up vs > 5 Years Off IS Tolerant   |
| 221095_PM_s_at  | KCNE2             | potassium voltage-gated channel, Isk-related family, member 2                           | 5.10E-05 | -1.52 | Normal down vs > 5 Years Off IS Tolerant |

|                 |           |                                                                              |          |       |                                          |
|-----------------|-----------|------------------------------------------------------------------------------|----------|-------|------------------------------------------|
| 1553856_PM_s_at | P2RY10    | purinergic receptor P2Y, G-protein coupled, 10                               | 5.11E-05 | 2.36  | Normal up vs > 5 Years Off IS Tolerant   |
| 217850_PM_at    | GNL3      | guanine nucleotide binding protein-like 3 (nucleolar)                        | 5.11E-05 | 1.50  | Normal up vs > 5 Years Off IS Tolerant   |
| 217988_PM_at    | CCNB1IP1  | cyclin B1 interacting protein 1                                              | 5.12E-05 | 1.76  | Normal up vs > 5 Years Off IS Tolerant   |
| 1554933_PM_at   | PSIP1     | PC4 and SFRS1 interacting protein 1                                          | 5.14E-05 | 2.15  | Normal up vs > 5 Years Off IS Tolerant   |
| 224759_PM_s_at  | C12orf23  | chromosome 12 open reading frame 23                                          | 5.14E-05 | 2.18  | Normal up vs > 5 Years Off IS Tolerant   |
| 203884_PM_s_at  | RAB11FIP2 | RAB11 family interacting protein 2 (class I)                                 | 5.17E-05 | 1.73  | Normal up vs > 5 Years Off IS Tolerant   |
| 236276_PM_at    | ---       | ---                                                                          | 5.18E-05 | -1.46 | Normal down vs > 5 Years Off IS Tolerant |
| 227865_PM_at    | C9orf103  | chromosome 9 open reading frame 103                                          | 5.19E-05 | 1.80  | Normal up vs > 5 Years Off IS Tolerant   |
| 217813_PM_s_at  | SPIN1     | spindlin 1                                                                   | 5.19E-05 | 1.99  | Normal up vs > 5 Years Off IS Tolerant   |
| 225706_PM_at    | GLCCI1    | glucocorticoid induced transcript 1                                          | 5.22E-05 | 1.86  | Normal up vs > 5 Years Off IS Tolerant   |
| 218237_PM_s_at  | SLC38A1   | solute carrier family 38, member 1                                           | 5.23E-05 | 1.88  | Normal up vs > 5 Years Off IS Tolerant   |
| 203047_PM_at    | STK10     | serine/threonine kinase 10                                                   | 5.24E-05 | 1.43  | Normal up vs > 5 Years Off IS Tolerant   |
| 244492_PM_at    | ---       | ---                                                                          | 5.27E-05 | 2.09  | Normal up vs > 5 Years Off IS Tolerant   |
| 234761_PM_at    | ---       | ---                                                                          | 5.28E-05 | -1.68 | Normal down vs > 5 Years Off IS Tolerant |
| 202900_PM_s_at  | NUP88     | nucleoporin 88kDa                                                            | 5.30E-05 | 1.98  | Normal up vs > 5 Years Off IS Tolerant   |
| 1552564_PM_at   | NUDT9P1   | nudix (nucleoside diphosphate linked moiety X)-type motif 9 pseudogene 1     | 5.34E-05 | 1.52  | Normal up vs > 5 Years Off IS Tolerant   |
| 212205_PM_at    | H2AFV     | H2A histone family, member V                                                 | 5.34E-05 | 1.47  | Normal up vs > 5 Years Off IS Tolerant   |
| 221593_PM_s_at  | RPL31     | ribosomal protein L31                                                        | 5.39E-05 | 1.68  | Normal up vs > 5 Years Off IS Tolerant   |
| 209152_PM_s_at  | TCF3      | transcription factor 3 (E2A immunoglobulin enhancer binding factors E12/E47) | 5.41E-05 | 2.14  | Normal up vs > 5 Years Off IS Tolerant   |

|                |          |                                                                                        |          |       |                                          |
|----------------|----------|----------------------------------------------------------------------------------------|----------|-------|------------------------------------------|
| 202863_PM_at   | SP100    | SP100 nuclear antigen                                                                  | 5.44E-05 | 1.46  | Normal up vs > 5 Years Off IS Tolerant   |
| 217978_PM_s_at | UBE2Q1   | ubiquitin-conjugating enzyme E2Q family member 1                                       | 5.47E-05 | 1.34  | Normal up vs > 5 Years Off IS Tolerant   |
| 1562254_PM_at  | ---      | ---                                                                                    | 5.48E-05 | -1.67 | Normal down vs > 5 Years Off IS Tolerant |
| 210145_PM_at   | PLA2G4A  | phospholipase A2, group IVA (cytosolic, calcium-dependent)                             | 5.50E-05 | -2.09 | Normal down vs > 5 Years Off IS Tolerant |
| 224704_PM_at   | TNRC6A   | trinucleotide repeat containing 6A                                                     | 5.50E-05 | 1.59  | Normal up vs > 5 Years Off IS Tolerant   |
| 203113_PM_s_at | EEF1D    | eukaryotic translation elongation factor 1 delta (guanine nucleotide exchange protein) | 5.52E-05 | 1.32  | Normal up vs > 5 Years Off IS Tolerant   |
| 203218_PM_at   | MAPK9    | mitogen-activated protein kinase 9                                                     | 5.52E-05 | 1.72  | Normal up vs > 5 Years Off IS Tolerant   |
| 207416_PM_s_at | NFATC3   | nuclear factor of activated T-cells, cytoplasmic, calcineurin-dependent 3              | 5.55E-05 | 1.73  | Normal up vs > 5 Years Off IS Tolerant   |
| 204323_PM_x_at | NF1      | neurofibromin 1                                                                        | 5.58E-05 | -1.94 | Normal down vs > 5 Years Off IS Tolerant |
| 242666_PM_at   | ---      | ---                                                                                    | 5.58E-05 | 2.18  | Normal up vs > 5 Years Off IS Tolerant   |
| 214030_PM_at   | CRYBG3   | beta-gamma crystallin domain containing 3                                              | 5.59E-05 | -1.86 | Normal down vs > 5 Years Off IS Tolerant |
| 220303_PM_at   | PDZD3    | PDZ domain containing 3                                                                | 5.62E-05 | -1.77 | Normal down vs > 5 Years Off IS Tolerant |
| 1561014_PM_at  | ---      | ---                                                                                    | 5.64E-05 | -1.47 | Normal down vs > 5 Years Off IS Tolerant |
| 206739_PM_at   | HOXC5    | homeobox C5                                                                            | 5.65E-05 | -1.45 | Normal down vs > 5 Years Off IS Tolerant |
| 209142_PM_s_at | UBE2G1   | ubiquitin-conjugating enzyme E2G 1 (UBC7 homolog, yeast)                               | 5.67E-05 | 2.05  | Normal up vs > 5 Years Off IS Tolerant   |
| 222537_PM_s_at | CDC42SE1 | CDC42 small effector 1                                                                 | 5.70E-05 | 1.33  | Normal up vs > 5 Years Off IS Tolerant   |
| 239295_PM_at   | SRSF12   | serine/arginine-rich splicing factor 12                                                | 5.70E-05 | -1.55 | Normal down vs > 5 Years Off IS Tolerant |
| 238697_PM_at   | ---      | ---                                                                                    | 5.71E-05 | 1.43  | Normal up vs > 5 Years Off IS Tolerant   |
| 201504_PM_s_at | TSN      | translin                                                                               | 5.73E-05 | 2.38  | Normal up vs > 5 Years Off IS Tolerant   |

|                |           |                                                           |          |       |                                          |
|----------------|-----------|-----------------------------------------------------------|----------|-------|------------------------------------------|
| 231759_PM_at   | TAL2      | T-cell acute lymphocytic leukemia 2                       | 5.74E-05 | -1.47 | Normal down vs > 5 Years Off IS Tolerant |
| 208602_PM_x_at | CD6       | CD6 molecule                                              | 5.74E-05 | 1.85  | Normal up vs > 5 Years Off IS Tolerant   |
| 240570_PM_at   | INADL     | InaD-like (Drosophila)                                    | 5.76E-05 | 1.78  | Normal up vs > 5 Years Off IS Tolerant   |
| 212356_PM_at   | KHNYN     | KH and NYN domain containing                              | 5.77E-05 | 1.51  | Normal up vs > 5 Years Off IS Tolerant   |
| 1557350_PM_at  | G3BP1     | GTPase activating protein (SH3 domain) binding protein 1  | 5.82E-05 | 2.54  | Normal up vs > 5 Years Off IS Tolerant   |
| 1556129_PM_at  | LOC642533 | hypothetical LOC642533                                    | 5.82E-05 | -1.60 | Normal down vs > 5 Years Off IS Tolerant |
| 202521_PM_at   | CTCF      | CCCTC-binding factor (zinc finger protein)                | 5.84E-05 | 1.56  | Normal up vs > 5 Years Off IS Tolerant   |
| 225614_PM_at   | SAAL1     | serum amyloid A-like 1                                    | 5.86E-05 | 1.69  | Normal up vs > 5 Years Off IS Tolerant   |
| 1560282_PM_at  | ---       | ---                                                       | 5.89E-05 | -1.93 | Normal down vs > 5 Years Off IS Tolerant |
| 225533_PM_at   | PHF19     | PHD finger protein 19                                     | 5.93E-05 | 1.44  | Normal up vs > 5 Years Off IS Tolerant   |
| 238737_PM_at   | C1orf83   | chromosome 1 open reading frame 83                        | 5.95E-05 | -1.46 | Normal down vs > 5 Years Off IS Tolerant |
| 230848_PM_s_at | MGA       | MAX gene associated                                       | 5.96E-05 | -1.76 | Normal down vs > 5 Years Off IS Tolerant |
| 225633_PM_at   | DPY19L3   | dpy-19-like 3 (C. elegans)                                | 5.98E-05 | 1.91  | Normal up vs > 5 Years Off IS Tolerant   |
| 205878_PM_at   | POU6F1    | POU class 6 homeobox 1                                    | 5.99E-05 | 1.80  | Normal up vs > 5 Years Off IS Tolerant   |
| 218677_PM_at   | S100A14   | S100 calcium binding protein A14                          | 5.99E-05 | -1.50 | Normal down vs > 5 Years Off IS Tolerant |
| 211893_PM_x_at | CD6       | CD6 molecule                                              | 6.00E-05 | 2.06  | Normal up vs > 5 Years Off IS Tolerant   |
| 216347_PM_s_at | PPP1R13B  | protein phosphatase 1, regulatory (inhibitor) subunit 13B | 6.01E-05 | 1.61  | Normal up vs > 5 Years Off IS Tolerant   |
| 238026_PM_at   | RPL35A    | ribosomal protein L35a                                    | 6.02E-05 | 2.46  | Normal up vs > 5 Years Off IS Tolerant   |
| 41644_PM_at    | SASH1     | SAM and SH3 domain containing 1                           | 6.05E-05 | -2.19 | Normal down vs > 5 Years Off IS Tolerant |



|                |              |                                                   |          |       |                                          |
|----------------|--------------|---------------------------------------------------|----------|-------|------------------------------------------|
| 221507_PM_at   | TNPO2        | transportin 2                                     | 6.06E-05 | 1.91  | Normal up vs > 5 Years Off IS Tolerant   |
| 204432_PM_at   | SOX12        | SRY (sex determining region Y)-box 12             | 6.08E-05 | 1.49  | Normal up vs > 5 Years Off IS Tolerant   |
| 220816_PM_at   | LPAR3        | lysophosphatidic acid receptor 3                  | 6.09E-05 | -1.46 | Normal down vs > 5 Years Off IS Tolerant |
| 214220_PM_s_at | ALMS1        | Alstrom syndrome 1                                | 6.10E-05 | 1.92  | Normal up vs > 5 Years Off IS Tolerant   |
| 215662_PM_at   | ---          | ---                                               | 6.12E-05 | -1.43 | Normal down vs > 5 Years Off IS Tolerant |
| 203048_PM_s_at | TTC37        | tetratricopeptide repeat domain 37                | 6.14E-05 | 1.95  | Normal up vs > 5 Years Off IS Tolerant   |
| 234192_PM_s_at | GKAP1        | G kinase anchoring protein 1                      | 6.14E-05 | 2.07  | Normal up vs > 5 Years Off IS Tolerant   |
| 214032_PM_at   | ZAP70        | zeta-chain (TCR) associated protein kinase 70kDa  | 6.16E-05 | 2.31  | Normal up vs > 5 Years Off IS Tolerant   |
| 204750_PM_s_at | DSC2         | desmocollin 2                                     | 6.26E-05 | -1.85 | Normal down vs > 5 Years Off IS Tolerant |
| 230656_PM_s_at | CIRH1A       | cirrhosis, autosomal recessive 1A (cirhin)        | 6.28E-05 | 1.70  | Normal up vs > 5 Years Off IS Tolerant   |
| 219798_PM_s_at | MEPCE        | methylphosphate capping enzyme                    | 6.31E-05 | 1.91  | Normal up vs > 5 Years Off IS Tolerant   |
| 230768_PM_at   | ---          | ---                                               | 6.32E-05 | 1.78  | Normal up vs > 5 Years Off IS Tolerant   |
| 230483_PM_at   | ---          | ---                                               | 6.39E-05 | 1.85  | Normal up vs > 5 Years Off IS Tolerant   |
| 234064_PM_at   | ---          | ---                                               | 6.43E-05 | -1.44 | Normal down vs > 5 Years Off IS Tolerant |
| 214104_PM_at   | GPR161       | G protein-coupled receptor 161                    | 6.48E-05 | -1.87 | Normal down vs > 5 Years Off IS Tolerant |
| 228345_PM_at   | CHIC1        | cysteine-rich hydrophobic domain 1                | 6.49E-05 | 2.17  | Normal up vs > 5 Years Off IS Tolerant   |
| 229544_PM_at   | ---          | ---                                               | 6.49E-05 | 2.23  | Normal up vs > 5 Years Off IS Tolerant   |
| 236097_PM_at   | LOC100510093 | hypothetical LOC100510093                         | 6.50E-05 | 1.80  | Normal up vs > 5 Years Off IS Tolerant   |
| 205192_PM_at   | MAP3K14      | mitogen-activated protein kinase kinase kinase 14 | 6.56E-05 | 1.67  | Normal up vs > 5 Years Off IS Tolerant   |

|                |           |                                                                                         |          |       |                                          |
|----------------|-----------|-----------------------------------------------------------------------------------------|----------|-------|------------------------------------------|
| 203965_PM_at   | USP20     | ubiquitin specific peptidase 20                                                         | 6.58E-05 | 1.67  | Normal up vs > 5 Years Off IS Tolerant   |
| 227076_PM_at   | NCAPH2    | non-SMC condensin II complex, subunit H2                                                | 6.61E-05 | 1.65  | Normal up vs > 5 Years Off IS Tolerant   |
| 220917_PM_s_at | WDR19     | WD repeat domain 19                                                                     | 6.62E-05 | 1.93  | Normal up vs > 5 Years Off IS Tolerant   |
| 213254_PM_at   | TNRC6B    | trinucleotide repeat containing 6B                                                      | 6.62E-05 | 1.47  | Normal up vs > 5 Years Off IS Tolerant   |
| 204936_PM_at   | MAP4K2    | mitogen-activated protein kinase kinase kinase kinase 2                                 | 6.63E-05 | 1.88  | Normal up vs > 5 Years Off IS Tolerant   |
| 218422_PM_s_at | RBM26     | RNA binding motif protein 26                                                            | 6.64E-05 | 1.55  | Normal up vs > 5 Years Off IS Tolerant   |
| 1569652_PM_at  | MLLT3     | myeloid/lymphoid or mixed-lineage leukemia (trithorax homolog, Drosophila); translocate | 6.65E-05 | 3.96  | Normal up vs > 5 Years Off IS Tolerant   |
| 230196_PM_x_at | ARHGAP23  | Rho GTPase activating protein 23                                                        | 6.67E-05 | -1.77 | Normal down vs > 5 Years Off IS Tolerant |
| 227979_PM_at   | RBM4      | RNA binding motif protein 4                                                             | 6.71E-05 | 1.88  | Normal up vs > 5 Years Off IS Tolerant   |
| 236832_PM_at   | LOC221442 | adenylate cyclase 10 pseudogene                                                         | 6.72E-05 | 2.14  | Normal up vs > 5 Years Off IS Tolerant   |
| 50314_PM_i_at  | C20orf27  | chromosome 20 open reading frame 27                                                     | 6.74E-05 | -2.07 | Normal down vs > 5 Years Off IS Tolerant |
| 226195_PM_at   | C14orf179 | chromosome 14 open reading frame 179                                                    | 6.75E-05 | 1.86  | Normal up vs > 5 Years Off IS Tolerant   |
| 209578_PM_s_at | POFUT2    | protein O-fucosyltransferase 2                                                          | 6.75E-05 | 1.53  | Normal up vs > 5 Years Off IS Tolerant   |
| 38892_PM_at    | KIAA0240  | KIAA0240                                                                                | 6.81E-05 | 1.69  | Normal up vs > 5 Years Off IS Tolerant   |
| 218346_PM_s_at | SESN1     | sestrin 1                                                                               | 6.82E-05 | 1.81  | Normal up vs > 5 Years Off IS Tolerant   |
| 238280_PM_at   | CYB5RL    | cytochrome b5 reductase-like                                                            | 6.83E-05 | -1.42 | Normal down vs > 5 Years Off IS Tolerant |
| 225629_PM_s_at | ZBTB4     | zinc finger and BTB domain containing 4                                                 | 6.83E-05 | 1.60  | Normal up vs > 5 Years Off IS Tolerant   |
| 202774_PM_s_at | SFSWAP    | splicing factor, suppressor of white-apricot homolog (Drosophila)                       | 6.85E-05 | 1.39  | Normal up vs > 5 Years Off IS Tolerant   |
| 1555931_PM_at  | ---       | ---                                                                                     | 6.89E-05 | -1.60 | Normal down vs > 5 Years Off IS Tolerant |

|                 |                            |                                                                                         |          |       |                                          |
|-----------------|----------------------------|-----------------------------------------------------------------------------------------|----------|-------|------------------------------------------|
| 213980_PM_s_at  | CTBP1                      | C-terminal binding protein 1                                                            | 6.96E-05 | 1.40  | Normal up vs > 5 Years Off IS Tolerant   |
| 203387_PM_s_at  | TBC1D4                     | TBC1 domain family, member 4                                                            | 6.97E-05 | 2.57  | Normal up vs > 5 Years Off IS Tolerant   |
| 241114_PM_s_at  | ---                        | ---                                                                                     | 6.98E-05 | -1.86 | Normal down vs > 5 Years Off IS Tolerant |
| 212080_PM_at    | MLL                        | myeloid/lymphoid or mixed-lineage leukemia (trithorax homolog, Drosophila)              | 6.99E-05 | 1.87  | Normal up vs > 5 Years Off IS Tolerant   |
| 242560_PM_at    | FANCD2                     | Fanconi anemia, complementation group D2                                                | 7.04E-05 | 2.04  | Normal up vs > 5 Years Off IS Tolerant   |
| 208309_PM_s_at  | MALT1                      | mucosa associated lymphoid tissue lymphoma translocation gene 1                         | 7.06E-05 | 2.20  | Normal up vs > 5 Years Off IS Tolerant   |
| 216210_PM_x_at  | TRIOBP                     | TRIO and F-actin binding protein                                                        | 7.12E-05 | -1.47 | Normal down vs > 5 Years Off IS Tolerant |
| 217729_PM_s_at  | AES                        | amino-terminal enhancer of split                                                        | 7.15E-05 | 1.65  | Normal up vs > 5 Years Off IS Tolerant   |
| 222010_PM_at    | TCP1                       | t-complex 1                                                                             | 7.17E-05 | 1.80  | Normal up vs > 5 Years Off IS Tolerant   |
| 1558322_PM_a_at | PAQR9                      | progesterin and adipoQ receptor family member IX                                        | 7.24E-05 | -1.66 | Normal down vs > 5 Years Off IS Tolerant |
| 232885_PM_at    | NCRNA00081                 | non-protein coding RNA 81                                                               | 7.25E-05 | 1.86  | Normal up vs > 5 Years Off IS Tolerant   |
| 1563076_PM_x_at | ---                        | ---                                                                                     | 7.27E-05 | 2.49  | Normal up vs > 5 Years Off IS Tolerant   |
| 209881_PM_s_at  | LAT /// SPNS1              | linker for activation of T cells /// spinster homolog 1 (Drosophila)                    | 7.30E-05 | 2.13  | Normal up vs > 5 Years Off IS Tolerant   |
| 228826_PM_at    | ---                        | ---                                                                                     | 7.30E-05 | 2.17  | Normal up vs > 5 Years Off IS Tolerant   |
| 1552520_PM_at   | TMEM74                     | transmembrane protein 74                                                                | 7.31E-05 | -1.62 | Normal down vs > 5 Years Off IS Tolerant |
| 219108_PM_x_at  | DDX27 /// SS18             | DEAD (Asp-Glu-Ala-Asp) box polypeptide 27 /// synovial sarcoma translocation, chromosom | 7.32E-05 | 1.43  | Normal up vs > 5 Years Off IS Tolerant   |
| 201023_PM_at    | TAF7                       | TAF7 RNA polymerase II, TATA box binding protein (TBP)-associated factor, 55kDa         | 7.34E-05 | 1.65  | Normal up vs > 5 Years Off IS Tolerant   |
| 233292_PM_s_at  | ANKHD1 /// ANKHD1-EIF4EBP3 | ankyrin repeat and KH domain containing 1 /// ANKHD1-EIF4EBP3 readthrough               | 7.36E-05 | 1.61  | Normal up vs > 5 Years Off IS Tolerant   |
| 225699_PM_at    | C7orf40                    | chromosome 7 open reading frame 40                                                      | 7.51E-05 | 2.64  | Normal up vs > 5 Years Off IS Tolerant   |

|                |          |                                                                                         |          |       |                                          |
|----------------|----------|-----------------------------------------------------------------------------------------|----------|-------|------------------------------------------|
| 237486_PM_at   | ---      | ---                                                                                     | 7.57E-05 | -1.59 | Normal down vs > 5 Years Off IS Tolerant |
| 207237_PM_at   | KCNA3    | potassium voltage-gated channel, shaker-related subfamily, member 3                     | 7.61E-05 | 2.91  | Normal up vs > 5 Years Off IS Tolerant   |
| 201386_PM_s_at | DHX15    | DEAH (Asp-Glu-Ala-His) box polypeptide 15                                               | 7.66E-05 | 1.54  | Normal up vs > 5 Years Off IS Tolerant   |
| 1556670_PM_at  | ---      | ---                                                                                     | 7.68E-05 | -1.42 | Normal down vs > 5 Years Off IS Tolerant |
| 202969_PM_at   | DYRK2    | dual-specificity tyrosine-(Y)-phosphorylation regulated kinase 2                        | 7.68E-05 | 2.26  | Normal up vs > 5 Years Off IS Tolerant   |
| 213394_PM_at   | MAPKBP1  | mitogen-activated protein kinase binding protein 1                                      | 7.69E-05 | 1.59  | Normal up vs > 5 Years Off IS Tolerant   |
| 200608_PM_s_at | RAD21    | RAD21 homolog ( <i>S. pombe</i> )                                                       | 7.70E-05 | 1.57  | Normal up vs > 5 Years Off IS Tolerant   |
| 217439_PM_at   | ---      | ---                                                                                     | 7.77E-05 | -1.44 | Normal down vs > 5 Years Off IS Tolerant |
| 230758_PM_at   | GEMIN8   | gem (nuclear organelle) associated protein 8                                            | 7.82E-05 | 1.70  | Normal up vs > 5 Years Off IS Tolerant   |
| 243888_PM_at   | ---      | ---                                                                                     | 7.84E-05 | 2.39  | Normal up vs > 5 Years Off IS Tolerant   |
| 1557908_PM_at  | ---      | ---                                                                                     | 7.84E-05 | -1.54 | Normal down vs > 5 Years Off IS Tolerant |
| 218648_PM_at   | CRTC3    | CREB regulated transcription coactivator 3                                              | 7.85E-05 | 1.60  | Normal up vs > 5 Years Off IS Tolerant   |
| 216788_PM_at   | ---      | ---                                                                                     | 7.85E-05 | -1.75 | Normal down vs > 5 Years Off IS Tolerant |
| 206542_PM_s_at | SMARCA2  | SWI/SNF related, matrix associated, actin dependent regulator of chromatin, subfamily a | 7.95E-05 | 1.61  | Normal up vs > 5 Years Off IS Tolerant   |
| 209730_PM_at   | SEMA3F   | sema domain, immunoglobulin domain (Ig), short basic domain, secreted, (semaphorin) 3F  | 8.03E-05 | -1.89 | Normal down vs > 5 Years Off IS Tolerant |
| 214157_PM_at   | GNAS     | GNAS complex locus                                                                      | 8.06E-05 | 2.40  | Normal up vs > 5 Years Off IS Tolerant   |
| 225862_PM_at   | SLC25A26 | solute carrier family 25, member 26                                                     | 8.06E-05 | 1.65  | Normal up vs > 5 Years Off IS Tolerant   |
| 222848_PM_at   | CENPK    | centromere protein K                                                                    | 8.07E-05 | 3.48  | Normal up vs > 5 Years Off IS Tolerant   |
| 202726_PM_at   | LIG1     | ligase I, DNA, ATP-dependent                                                            | 8.18E-05 | 1.73  | Normal up vs > 5 Years Off IS Tolerant   |

|                |               |                                                                          |          |       |                                          |
|----------------|---------------|--------------------------------------------------------------------------|----------|-------|------------------------------------------|
| 221047_PM_s_at | MARK1         | MAP/microtubule affinity-regulating kinase 1                             | 8.25E-05 | -1.38 | Normal down vs > 5 Years Off IS Tolerant |
| 208607_PM_s_at | SAA1 /// SAA2 | serum amyloid A1 /// serum amyloid A2                                    | 8.30E-05 | -1.43 | Normal down vs > 5 Years Off IS Tolerant |
| 242550_PM_at   | EIF3B         | eukaryotic translation initiation factor 3, subunit B                    | 8.32E-05 | 3.45  | Normal up vs > 5 Years Off IS Tolerant   |
| 1566038_PM_at  | DGCR7         | DiGeorge syndrome critical region gene 7                                 | 8.34E-05 | -1.43 | Normal down vs > 5 Years Off IS Tolerant |
| 203980_PM_at   | FABP4         | fatty acid binding protein 4, adipocyte                                  | 8.39E-05 | -1.69 | Normal down vs > 5 Years Off IS Tolerant |
| 241683_PM_at   | HECTD1        | HECT domain containing 1                                                 | 8.43E-05 | -1.58 | Normal down vs > 5 Years Off IS Tolerant |
| 206045_PM_s_at | NOL4          | nucleolar protein 4                                                      | 8.43E-05 | -1.50 | Normal down vs > 5 Years Off IS Tolerant |
| 218911_PM_at   | YEATS4        | YEATS domain containing 4                                                | 8.45E-05 | 2.25  | Normal up vs > 5 Years Off IS Tolerant   |
| 210886_PM_x_at | TP53TG1       | TP53 target 1 (non-protein coding)                                       | 8.46E-05 | 1.97  | Normal up vs > 5 Years Off IS Tolerant   |
| 204699_PM_s_at | C1orf107      | chromosome 1 open reading frame 107                                      | 8.50E-05 | 2.12  | Normal up vs > 5 Years Off IS Tolerant   |
| 200704_PM_at   | LITAF         | lipopolysaccharide-induced TNF factor                                    | 8.56E-05 | 1.77  | Normal up vs > 5 Years Off IS Tolerant   |
| 227414_PM_at   | RHBDD1        | rhomboid domain containing 1                                             | 8.56E-05 | 1.65  | Normal up vs > 5 Years Off IS Tolerant   |
| 212577_PM_at   | SMCHD1        | structural maintenance of chromosomes flexible hinge domain containing 1 | 8.57E-05 | 1.66  | Normal up vs > 5 Years Off IS Tolerant   |
| 212569_PM_at   | SMCHD1        | structural maintenance of chromosomes flexible hinge domain containing 1 | 8.57E-05 | 1.43  | Normal up vs > 5 Years Off IS Tolerant   |
| 231971_PM_at   | FANCM         | Fanconi anemia, complementation group M                                  | 8.65E-05 | -1.44 | Normal down vs > 5 Years Off IS Tolerant |
| 206419_PM_at   | RORC          | RAR-related orphan receptor C                                            | 8.68E-05 | -1.51 | Normal down vs > 5 Years Off IS Tolerant |
| 1552440_PM_at  | GPR182        | G protein-coupled receptor 182                                           | 8.69E-05 | -1.35 | Normal down vs > 5 Years Off IS Tolerant |
| 208771_PM_s_at | LTA4H         | leukotriene A4 hydrolase                                                 | 8.70E-05 | -1.82 | Normal down vs > 5 Years Off IS Tolerant |
| 242800_PM_at   | NHS           | Nance-Horan syndrome (congenital cataracts and dental anomalies)         | 8.77E-05 | -1.51 | Normal down vs > 5 Years Off IS Tolerant |

|                |         |                                                           |          |       |                                          |
|----------------|---------|-----------------------------------------------------------|----------|-------|------------------------------------------|
| 207023_PM_x_at | KRT10   | keratin 10                                                | 8.77E-05 | 1.72  | Normal up vs > 5 Years Off IS Tolerant   |
| 219673_PM_at   | MCM9    | minichromosome maintenance complex component 9            | 8.79E-05 | 2.28  | Normal up vs > 5 Years Off IS Tolerant   |
| 202333_PM_s_at | UBE2B   | ubiquitin-conjugating enzyme E2B (RAD6 homolog)           | 8.80E-05 | 1.51  | Normal up vs > 5 Years Off IS Tolerant   |
| 212415_PM_at   | 6-Sep   | septin 6                                                  | 8.90E-05 | 1.63  | Normal up vs > 5 Years Off IS Tolerant   |
| 208202_PM_s_at | PHF15   | PHD finger protein 15                                     | 8.91E-05 | 1.73  | Normal up vs > 5 Years Off IS Tolerant   |
| 244587_PM_at   | ATF7    | activating transcription factor 7                         | 8.98E-05 | -1.65 | Normal down vs > 5 Years Off IS Tolerant |
| 204355_PM_at   | DHX30   | DEAH (Asp-Glu-Ala-His) box polypeptide 30                 | 9.00E-05 | 1.95  | Normal up vs > 5 Years Off IS Tolerant   |
| 202890_PM_at   | MAP7    | microtubule-associated protein 7                          | 9.01E-05 | -1.91 | Normal down vs > 5 Years Off IS Tolerant |
| 228954_PM_at   | LYSMD4  | LysM, putative peptidoglycan-binding, domain containing 4 | 9.02E-05 | 1.53  | Normal up vs > 5 Years Off IS Tolerant   |
| 209750_PM_at   | NR1D2   | nuclear receptor subfamily 1, group D, member 2           | 9.06E-05 | 3.48  | Normal up vs > 5 Years Off IS Tolerant   |
| 210309_PM_at   | RECQL5  | RecQ protein-like 5                                       | 9.08E-05 | -1.59 | Normal down vs > 5 Years Off IS Tolerant |
| 1559711_PM_at  | FAM120A | family with sequence similarity 120A                      | 9.09E-05 | -1.37 | Normal down vs > 5 Years Off IS Tolerant |
| 235509_PM_at   | C8orf38 | chromosome 8 open reading frame 38                        | 9.09E-05 | 1.97  | Normal up vs > 5 Years Off IS Tolerant   |
| 237497_PM_at   | ---     | ---                                                       | 9.12E-05 | 1.98  | Normal up vs > 5 Years Off IS Tolerant   |
| 215201_PM_at   | REPS1   | RALBP1 associated Eps domain containing 1                 | 9.12E-05 | 2.63  | Normal up vs > 5 Years Off IS Tolerant   |
| 238043_PM_at   | ARID1B  | AT rich interactive domain 1B (SWI1-like)                 | 9.14E-05 | 1.92  | Normal up vs > 5 Years Off IS Tolerant   |
| 216794_PM_at   | ---     | ---                                                       | 9.14E-05 | -1.34 | Normal down vs > 5 Years Off IS Tolerant |
| 212684_PM_at   | ZNF3    | zinc finger protein 3                                     | 9.16E-05 | 1.72  | Normal up vs > 5 Years Off IS Tolerant   |
| 213305_PM_s_at | PPP2R5C | protein phosphatase 2, regulatory subunit B', gamma       | 9.16E-05 | 1.67  | Normal up vs > 5 Years Off IS Tolerant   |

|                |           |                                                                                       |          |       |                                          |
|----------------|-----------|---------------------------------------------------------------------------------------|----------|-------|------------------------------------------|
| 212566_PM_at   | MAP4      | microtubule-associated protein 4                                                      | 9.22E-05 | 1.60  | Normal up vs > 5 Years Off IS Tolerant   |
| 236288_PM_at   | RNF34     | ring finger protein 34                                                                | 9.24E-05 | 1.98  | Normal up vs > 5 Years Off IS Tolerant   |
| 202869_PM_at   | OAS1      | 2',5'-oligoadenylate synthetase 1, 40/46kDa                                           | 9.26E-05 | -3.67 | Normal down vs > 5 Years Off IS Tolerant |
| 1555210_PM_at  | DTWD1     | DTW domain containing 1                                                               | 9.28E-05 | -1.34 | Normal down vs > 5 Years Off IS Tolerant |
| 222895_PM_s_at | BCL11B    | B-cell CLL/lymphoma 11B (zinc finger protein)                                         | 9.29E-05 | 3.03  | Normal up vs > 5 Years Off IS Tolerant   |
| 224807_PM_at   | GRAMD1A   | GRAM domain containing 1A                                                             | 9.30E-05 | 1.66  | Normal up vs > 5 Years Off IS Tolerant   |
| 239425_PM_at   | DCUN1D5   | DCN1, defective in cullin neddylation 1, domain containing 5 ( <i>S. cerevisiae</i> ) | 9.30E-05 | 1.95  | Normal up vs > 5 Years Off IS Tolerant   |
| 235478_PM_at   | DCLRE1C   | DNA cross-link repair 1C                                                              | 9.33E-05 | -2.17 | Normal down vs > 5 Years Off IS Tolerant |
| 234319_PM_at   | STOX2     | storkhead box 2                                                                       | 9.39E-05 | -1.46 | Normal down vs > 5 Years Off IS Tolerant |
| 218080_PM_x_at | FAF1      | Fas (TNFRSF6) associated factor 1                                                     | 9.45E-05 | 1.45  | Normal up vs > 5 Years Off IS Tolerant   |
| 215779_PM_s_at | HIST1H2BG | histone cluster 1, H2bg                                                               | 9.47E-05 | 3.81  | Normal up vs > 5 Years Off IS Tolerant   |
| 212544_PM_at   | ZNHIT3    | zinc finger, HIT-type containing 3                                                    | 9.48E-05 | 1.79  | Normal up vs > 5 Years Off IS Tolerant   |
| 204841_PM_s_at | EEA1      | early endosome antigen 1                                                              | 9.49E-05 | -1.61 | Normal down vs > 5 Years Off IS Tolerant |
| 200653_PM_s_at | CALM1     | calmodulin 1 (phosphorylase kinase, delta)                                            | 9.53E-05 | 1.33  | Normal up vs > 5 Years Off IS Tolerant   |
| 212916_PM_at   | PHF8      | PHD finger protein 8                                                                  | 9.59E-05 | 1.39  | Normal up vs > 5 Years Off IS Tolerant   |
| 218107_PM_at   | WDR26     | WD repeat domain 26                                                                   | 9.59E-05 | 1.23  | Normal up vs > 5 Years Off IS Tolerant   |
| 207190_PM_at   | ZZEF1     | zinc finger, ZZ-type with EF-hand domain 1                                            | 9.60E-05 | 1.95  | Normal up vs > 5 Years Off IS Tolerant   |
| 232650_PM_at   | C12orf65  | chromosome 12 open reading frame 65                                                   | 9.61E-05 | 1.65  | Normal up vs > 5 Years Off IS Tolerant   |
| 227541_PM_at   | WDR20     | WD repeat domain 20                                                                   | 9.61E-05 | 1.83  | Normal up vs > 5 Years Off IS Tolerant   |

|                |         |                                                               |          |       |                                          |
|----------------|---------|---------------------------------------------------------------|----------|-------|------------------------------------------|
| 228983_PM_at   | ---     | ---                                                           | 9.64E-05 | 1.97  | Normal up vs > 5 Years Off IS Tolerant   |
| 200927_PM_s_at | RAB14   | RAB14, member RAS oncogene family                             | 9.64E-05 | 2.04  | Normal up vs > 5 Years Off IS Tolerant   |
| 222757_PM_s_at | ZAK     | sterile alpha motif and leucine zipper containing kinase AZK  | 9.65E-05 | -2.42 | Normal down vs > 5 Years Off IS Tolerant |
| 1559222_PM_at  | ---     | ---                                                           | 9.65E-05 | -1.77 | Normal down vs > 5 Years Off IS Tolerant |
| 224593_PM_at   | ZNF664  | zinc finger protein 664                                       | 9.70E-05 | 1.57  | Normal up vs > 5 Years Off IS Tolerant   |
| 225131_PM_at   | ZRANB1  | zinc finger, RAN-binding domain containing 1                  | 9.72E-05 | 2.27  | Normal up vs > 5 Years Off IS Tolerant   |
| 215267_PM_s_at | SLC8A2  | solute carrier family 8 (sodium/calcium exchanger), member 2  | 9.73E-05 | -1.52 | Normal down vs > 5 Years Off IS Tolerant |
| 243864_PM_at   | CCDC80  | coiled-coil domain containing 80                              | 9.74E-05 | -1.84 | Normal down vs > 5 Years Off IS Tolerant |
| 230214_PM_at   | MRVI1   | murine retrovirus integration site 1 homolog                  | 9.77E-05 | -2.91 | Normal down vs > 5 Years Off IS Tolerant |
| 210620_PM_s_at | GTF3C2  | general transcription factor IIIC, polypeptide 2, beta 110kDa | 9.79E-05 | 1.74  | Normal up vs > 5 Years Off IS Tolerant   |
| 230322_PM_at   | NFAM1   | NFAT activating protein with ITAM motif 1                     | 9.83E-05 | -1.69 | Normal down vs > 5 Years Off IS Tolerant |
| 218324_PM_s_at | SPATS2  | spermatogenesis associated, serine-rich 2                     | 9.91E-05 | 1.51  | Normal up vs > 5 Years Off IS Tolerant   |
| 229287_PM_at   | PCNX    | pecanex homolog (Drosophila)                                  | 9.91E-05 | 1.91  | Normal up vs > 5 Years Off IS Tolerant   |
| 224243_PM_at   | APOA5   | apolipoprotein A-V                                            | 9.94E-05 | -1.40 | Normal down vs > 5 Years Off IS Tolerant |
| 237735_PM_at   | ---     | ---                                                           | 9.97E-05 | -1.40 | Normal down vs > 5 Years Off IS Tolerant |
| 225919_PM_s_at | C9orf72 | chromosome 9 open reading frame 72                            | 9.97E-05 | -1.75 | Normal down vs > 5 Years Off IS Tolerant |
| 222876_PM_s_at | ADAP2   | ArfGAP with dual PH domains 2                                 | 0.0001   | -2.01 | Normal down vs > 5 Years Off IS Tolerant |
| 227656_PM_at   | C6orf70 | chromosome 6 open reading frame 70                            | 0.0001   | 1.68  | Normal up vs > 5 Years Off IS Tolerant   |
| 1559993_PM_at  | SFXN3   | Sideroflexin 3                                                | 0.0001   | 2.64  | Normal up vs > 5 Years Off IS Tolerant   |



|                |                |                                                                                         |        |       |                                          |
|----------------|----------------|-----------------------------------------------------------------------------------------|--------|-------|------------------------------------------|
| 220021_PM_at   | TMC7           | transmembrane channel-like 7                                                            | 0.0001 | -1.32 | Normal down vs > 5 Years Off IS Tolerant |
| 207572_PM_at   | ---            | ---                                                                                     | 0.0001 | -1.42 | Normal down vs > 5 Years Off IS Tolerant |
| 1569959_PM_at  | ---            | ---                                                                                     | 0.0001 | -1.43 | Normal down vs > 5 Years Off IS Tolerant |
| 224784_PM_at   | MLLT6          | myeloid/lymphoid or mixed-lineage leukemia (trithorax homolog, Drosophila); translocate | 0.0001 | 1.73  | Normal up vs > 5 Years Off IS Tolerant   |
| 34225_PM_at    | WHSC2          | Wolf-Hirschhorn syndrome candidate 2                                                    | 0.0001 | 1.41  | Normal up vs > 5 Years Off IS Tolerant   |
| 239076_PM_at   | SEPT7P2        | Septin 7 pseudogene 2                                                                   | 0.0001 | -1.92 | Normal down vs > 5 Years Off IS Tolerant |
| 209688_PM_s_at | CCDC93         | coiled-coil domain containing 93                                                        | 0.0001 | 1.59  | Normal up vs > 5 Years Off IS Tolerant   |
| 224827_PM_at   | UBTD2          | ubiquitin domain containing 2                                                           | 0.0001 | -2.30 | Normal down vs > 5 Years Off IS Tolerant |
| 235908_PM_at   | MMP11          | matrix metalloproteinase 11 (stromelysin 3)                                             | 0.0001 | -1.52 | Normal down vs > 5 Years Off IS Tolerant |
| 208690_PM_s_at | PDLIM1         | PDZ and LIM domain 1                                                                    | 0.0001 | 2.21  | Normal up vs > 5 Years Off IS Tolerant   |
| 223358_PM_s_at | PDE7A          | phosphodiesterase 7A                                                                    | 0.0001 | 2.08  | Normal up vs > 5 Years Off IS Tolerant   |
| 216342_PM_x_at | ---            | ---                                                                                     | 0.0001 | 1.53  | Normal up vs > 5 Years Off IS Tolerant   |
| 212368_PM_at   | ZNF292         | zinc finger protein 292                                                                 | 0.0001 | 1.60  | Normal up vs > 5 Years Off IS Tolerant   |
| 224060_PM_s_at | DPH5           | DPH5 homolog (S. cerevisiae)                                                            | 0.0001 | 2.22  | Normal up vs > 5 Years Off IS Tolerant   |
| 202632_PM_at   | DPH1 /// OVCA2 | DPH1 homolog (S. cerevisiae) /// ovarian tumor suppressor candidate 2                   | 0.0001 | 1.51  | Normal up vs > 5 Years Off IS Tolerant   |
| 217957_PM_at   | C16orf80       | chromosome 16 open reading frame 80                                                     | 0.0001 | 1.73  | Normal up vs > 5 Years Off IS Tolerant   |
| 207321_PM_s_at | ABCB9          | ATP-binding cassette, sub-family B (MDR/TAP), member 9                                  | 0.0001 | -1.52 | Normal down vs > 5 Years Off IS Tolerant |
| 205589_PM_at   | MYL3           | myosin, light chain 3, alkali; ventricular, skeletal, slow                              | 0.0001 | -1.37 | Normal down vs > 5 Years Off IS Tolerant |
| 237879_PM_at   | ---            | ---                                                                                     | 0.0001 | -1.57 | Normal down vs > 5 Years Off IS Tolerant |

|                 |          |                                                                  |        |       |                                          |
|-----------------|----------|------------------------------------------------------------------|--------|-------|------------------------------------------|
| 229025_PM_s_at  | IMMP1L   | IMP1 inner mitochondrial membrane peptidase-like (S. cerevisiae) | 0.0001 | 1.96  | Normal up vs > 5 Years Off IS Tolerant   |
| 228512_PM_at    | PTCD3    | Pentatricopeptide repeat domain 3                                | 0.0001 | 1.96  | Normal up vs > 5 Years Off IS Tolerant   |
| 209726_PM_at    | CA11     | carbonic anhydrase XI                                            | 0.0001 | 1.51  | Normal up vs > 5 Years Off IS Tolerant   |
| 242808_PM_at    | ---      | ---                                                              | 0.0001 | 1.76  | Normal up vs > 5 Years Off IS Tolerant   |
| 226823_PM_at    | PHACTR4  | phosphatase and actin regulator 4                                | 0.0001 | 1.38  | Normal up vs > 5 Years Off IS Tolerant   |
| 226684_PM_at    | ATG2B    | ATG2 autophagy related 2 homolog B (S. cerevisiae)               | 0.0001 | 1.44  | Normal up vs > 5 Years Off IS Tolerant   |
| 225421_PM_at    | PM20D2   | peptidase M20 domain containing 2                                | 0.0001 | 2.36  | Normal up vs > 5 Years Off IS Tolerant   |
| 212601_PM_at    | ZZEF1    | zinc finger, ZZ-type with EF-hand domain 1                       | 0.0001 | 1.52  | Normal up vs > 5 Years Off IS Tolerant   |
| 208944_PM_at    | TGFBR2   | transforming growth factor, beta receptor II (70/80kDa)          | 0.0001 | 1.39  | Normal up vs > 5 Years Off IS Tolerant   |
| 213587_PM_s_at  | ATP6V0E2 | ATPase, H <sup>+</sup> transporting V0 subunit e2                | 0.0001 | 2.20  | Normal up vs > 5 Years Off IS Tolerant   |
| 212931_PM_at    | TCF20    | transcription factor 20 (AR1)                                    | 0.0001 | 1.40  | Normal up vs > 5 Years Off IS Tolerant   |
| 1555562_PM_a_at | ZCCHC7   | zinc finger, CCHC domain containing 7                            | 0.0001 | 1.92  | Normal up vs > 5 Years Off IS Tolerant   |
| 215964_PM_at    | ---      | ---                                                              | 0.0001 | -1.44 | Normal down vs > 5 Years Off IS Tolerant |
| 217573_PM_at    | GRIN2C   | glutamate receptor, ionotropic, N-methyl D-aspartate 2C          | 0.0001 | -1.61 | Normal down vs > 5 Years Off IS Tolerant |
| 222214_PM_at    | ---      | ---                                                              | 0.0001 | 1.86  | Normal up vs > 5 Years Off IS Tolerant   |
| 238515_PM_at    | NUDT16   | nudix (nucleoside diphosphate linked moiety X)-type motif 16     | 0.0001 | -1.66 | Normal down vs > 5 Years Off IS Tolerant |
| 241292_PM_at    | ---      | ---                                                              | 0.0001 | -1.43 | Normal down vs > 5 Years Off IS Tolerant |
| 243782_PM_at    | ---      | ---                                                              | 0.0001 | -1.78 | Normal down vs > 5 Years Off IS Tolerant |
| 237426_PM_at    | SP100    | SP100 nuclear antigen                                            | 0.0001 | 1.79  | Normal up vs > 5 Years Off IS Tolerant   |

|                |                                 |                                                                                         |        |       |                                          |
|----------------|---------------------------------|-----------------------------------------------------------------------------------------|--------|-------|------------------------------------------|
| 224703_PM_at   | DCAF5                           | DDB1 and CUL4 associated factor 5                                                       | 0.0001 | 1.47  | Normal up vs > 5 Years Off IS Tolerant   |
| 227625_PM_s_at | STUB1                           | STIP1 homology and U-box containing protein 1, E3 ubiquitin protein ligase              | 0.0001 | 1.36  | Normal up vs > 5 Years Off IS Tolerant   |
| 236885_PM_at   | MEX3A                           | mex-3 homolog A (C. elegans)                                                            | 0.0001 | -1.88 | Normal down vs > 5 Years Off IS Tolerant |
| 1563513_PM_at  | SYTL4                           | synaptotagmin-like 4                                                                    | 0.0001 | -1.54 | Normal down vs > 5 Years Off IS Tolerant |
| 201879_PM_at   | ARIH1                           | ariadne homolog, ubiquitin-conjugating enzyme E2 binding protein, 1 (Drosophila)        | 0.0001 | 1.96  | Normal up vs > 5 Years Off IS Tolerant   |
| 237208_PM_at   | WDR61                           | WD repeat domain 61                                                                     | 0.0001 | 1.80  | Normal up vs > 5 Years Off IS Tolerant   |
| 227525_PM_at   | GLCCI1                          | glucocorticoid induced transcript 1                                                     | 0.0001 | 2.06  | Normal up vs > 5 Years Off IS Tolerant   |
| 209774_PM_x_at | CXCL2                           | chemokine (C-X-C motif) ligand 2                                                        | 0.0001 | 8.90  | Normal up vs > 5 Years Off IS Tolerant   |
| 209504_PM_s_at | PLEKHB1                         | pleckstrin homology domain containing, family B (evectins) member 1                     | 0.0001 | 1.85  | Normal up vs > 5 Years Off IS Tolerant   |
| 228113_PM_at   | RAB37                           | RAB37, member RAS oncogene family                                                       | 0.0001 | 1.69  | Normal up vs > 5 Years Off IS Tolerant   |
| 224524_PM_s_at | ASB3 /// GPR75 /// LOC100302652 | ankyrin repeat and SOCS box-containing 3 /// G protein-coupled receptor 75 /// GPR75-AS | 0.0001 | 1.72  | Normal up vs > 5 Years Off IS Tolerant   |
| 1563089_PM_at  | LOC100287027                    | Similar to hCG2038690                                                                   | 0.0001 | -1.45 | Normal down vs > 5 Years Off IS Tolerant |
| 224217_PM_s_at | FAF1                            | Fas (TNFRSF6) associated factor 1                                                       | 0.0001 | 1.73  | Normal up vs > 5 Years Off IS Tolerant   |
| 1564248_PM_at  | ---                             | ---                                                                                     | 0.0001 | 2.93  | Normal up vs > 5 Years Off IS Tolerant   |
| 220993_PM_s_at | GPR63                           | G protein-coupled receptor 63                                                           | 0.0001 | -1.81 | Normal down vs > 5 Years Off IS Tolerant |
| 226687_PM_at   | PRPF40A                         | PRP40 pre-mRNA processing factor 40 homolog A (S. cerevisiae)                           | 0.0001 | 1.58  | Normal up vs > 5 Years Off IS Tolerant   |
| 240591_PM_at   | ---                             | ---                                                                                     | 0.0001 | -1.44 | Normal down vs > 5 Years Off IS Tolerant |
| 238480_PM_at   | TTC39C                          | tetratricopeptide repeat domain 39C                                                     | 0.0001 | 1.72  | Normal up vs > 5 Years Off IS Tolerant   |
| 211747_PM_s_at | LSM5                            | LSM5 homolog, U6 small nuclear RNA associated (S. cerevisiae)                           | 0.0001 | 1.77  | Normal up vs > 5 Years Off IS Tolerant   |

|                |                        |                                                       |        |       |                                          |
|----------------|------------------------|-------------------------------------------------------|--------|-------|------------------------------------------|
| 225615_PM_at   | IFFO2                  | intermediate filament family orphan 2                 | 0.0001 | 1.80  | Normal up vs > 5 Years Off IS Tolerant   |
| 202548_PM_s_at | ARHGEF7                | Rho guanine nucleotide exchange factor (GEF) 7        | 0.0001 | 1.45  | Normal up vs > 5 Years Off IS Tolerant   |
| 219376_PM_at   | ZNF322A ///<br>ZNF322B | zinc finger protein 322A /// zinc finger protein 322B | 0.0001 | -1.58 | Normal down vs > 5 Years Off IS Tolerant |
| 1555187_PM_at  | ---                    | ---                                                   | 0.0001 | -2.16 | Normal down vs > 5 Years Off IS Tolerant |
| 1552584_PM_at  | IL12RB1                | interleukin 12 receptor, beta 1                       | 0.0001 | 1.58  | Normal up vs > 5 Years Off IS Tolerant   |
| 237702_PM_at   | RBM45                  | RNA binding motif protein 45                          | 0.0001 | -1.44 | Normal down vs > 5 Years Off IS Tolerant |
| 228702_PM_at   | FLJ43663               | hypothetical LOC378805                                | 0.0001 | 2.40  | Normal up vs > 5 Years Off IS Tolerant   |
| 225473_PM_at   | C20orf117              | chromosome 20 open reading frame 117                  | 0.0001 | -1.41 | Normal down vs > 5 Years Off IS Tolerant |
| 209259_PM_s_at | SMC3                   | structural maintenance of chromosomes 3               | 0.0001 | 1.95  | Normal up vs > 5 Years Off IS Tolerant   |
| 220214_PM_at   | ZNF215                 | zinc finger protein 215                               | 0.0001 | -1.39 | Normal down vs > 5 Years Off IS Tolerant |
| 220606_PM_s_at | C17orf48               | chromosome 17 open reading frame 48                   | 0.0001 | 2.44  | Normal up vs > 5 Years Off IS Tolerant   |
| 237286_PM_at   | INTS9                  | Integrator complex subunit 9                          | 0.0001 | -1.60 | Normal down vs > 5 Years Off IS Tolerant |
| 218754_PM_at   | NOL9                   | nucleolar protein 9                                   | 0.0001 | 1.60  | Normal up vs > 5 Years Off IS Tolerant   |
| 239673_PM_at   | ---                    | ---                                                   | 0.0001 | 3.15  | Normal up vs > 5 Years Off IS Tolerant   |
| 217965_PM_s_at | SAP30BP                | SAP30 binding protein                                 | 0.0001 | 1.76  | Normal up vs > 5 Years Off IS Tolerant   |
| 35685_PM_at    | RING1                  | ring finger protein 1                                 | 0.0001 | 1.38  | Normal up vs > 5 Years Off IS Tolerant   |
| 230636_PM_s_at | KLF9                   | Kruppel-like factor 9                                 | 0.0001 | 1.67  | Normal up vs > 5 Years Off IS Tolerant   |
| 204718_PM_at   | EPHB6                  | EPH receptor B6                                       | 0.0001 | 1.69  | Normal up vs > 5 Years Off IS Tolerant   |
| 219408_PM_at   | PRMT7                  | protein arginine methyltransferase 7                  | 0.0001 | 1.60  | Normal up vs > 5 Years Off IS Tolerant   |

|                 |          |                                                                                         |        |       |                                          |
|-----------------|----------|-----------------------------------------------------------------------------------------|--------|-------|------------------------------------------|
| 1553243_PM_at   | ITIH5    | inter-alpha (globulin) inhibitor H5                                                     | 0.0001 | -1.38 | Normal down vs > 5 Years Off IS Tolerant |
| 205324_PM_s_at  | FTSJ1    | FtsJ homolog 1 (E. coli)                                                                | 0.0001 | 1.71  | Normal up vs > 5 Years Off IS Tolerant   |
| 230004_PM_at    | USP24    | ubiquitin specific peptidase 24                                                         | 0.0001 | 1.79  | Normal up vs > 5 Years Off IS Tolerant   |
| 1553971_PM_a_at | GATS     | GATS, stromal antigen 3 opposite strand                                                 | 0.0001 | 1.82  | Normal up vs > 5 Years Off IS Tolerant   |
| 229264_PM_at    | ---      | ---                                                                                     | 0.0001 | 1.94  | Normal up vs > 5 Years Off IS Tolerant   |
| 240948_PM_at    | ---      | ---                                                                                     | 0.0001 | -2.01 | Normal down vs > 5 Years Off IS Tolerant |
| 225992_PM_at    | MLLT10   | myeloid/lymphoid or mixed-lineage leukemia (trithorax homolog, Drosophila); translocate | 0.0001 | 1.46  | Normal up vs > 5 Years Off IS Tolerant   |
| 201528_PM_at    | RPA1     | replication protein A1, 70kDa                                                           | 0.0001 | 1.69  | Normal up vs > 5 Years Off IS Tolerant   |
| 213954_PM_at    | FAM169A  | family with sequence similarity 169, member A                                           | 0.0001 | 2.20  | Normal up vs > 5 Years Off IS Tolerant   |
| 217742_PM_s_at  | WAC      | WW domain containing adaptor with coiled-coil                                           | 0.0001 | 1.21  | Normal up vs > 5 Years Off IS Tolerant   |
| 223862_PM_at    | GHRL     | ghrelin/obestatin prepropeptide                                                         | 0.0001 | -1.59 | Normal down vs > 5 Years Off IS Tolerant |
| 1560634_PM_a_at | ---      | ---                                                                                     | 0.0001 | -1.36 | Normal down vs > 5 Years Off IS Tolerant |
| 238842_PM_at    | ---      | ---                                                                                     | 0.0001 | 1.79  | Normal up vs > 5 Years Off IS Tolerant   |
| 237765_PM_at    | SLC25A47 | solute carrier family 25, member 47                                                     | 0.0001 | -1.53 | Normal down vs > 5 Years Off IS Tolerant |
| 37860_PM_at     | ZNF337   | zinc finger protein 337                                                                 | 0.0001 | 1.65  | Normal up vs > 5 Years Off IS Tolerant   |
| 228079_PM_at    | C3orf58  | chromosome 3 open reading frame 58                                                      | 0.0001 | -1.39 | Normal down vs > 5 Years Off IS Tolerant |
| 227973_PM_at    | C2orf69  | chromosome 2 open reading frame 69                                                      | 0.0001 | 2.03  | Normal up vs > 5 Years Off IS Tolerant   |
| 213113_PM_s_at  | SLC43A3  | solute carrier family 43, member 3                                                      | 0.0001 | -1.87 | Normal down vs > 5 Years Off IS Tolerant |
| 212623_PM_at    | TMEM41B  | transmembrane protein 41B                                                               | 0.0001 | 1.92  | Normal up vs > 5 Years Off IS Tolerant   |

|                 |                |                                                                                    |        |       |                                          |
|-----------------|----------------|------------------------------------------------------------------------------------|--------|-------|------------------------------------------|
| 239792_PM_at    | LOC440288      | similar to FLJ16518 protein                                                        | 0.0001 | 2.22  | Normal up vs > 5 Years Off IS Tolerant   |
| 201499_PM_s_at  | USP7           | ubiquitin specific peptidase 7 (herpes virus-associated)                           | 0.0001 | 1.31  | Normal up vs > 5 Years Off IS Tolerant   |
| 224163_PM_s_at  | DMAP1          | DNA methyltransferase 1 associated protein 1                                       | 0.0001 | 1.88  | Normal up vs > 5 Years Off IS Tolerant   |
| 205320_PM_at    | APC2           | adenomatosis polyposis coli 2                                                      | 0.0001 | -1.34 | Normal down vs > 5 Years Off IS Tolerant |
| 219637_PM_at    | ARMC9          | armadillo repeat containing 9                                                      | 0.0001 | -1.40 | Normal down vs > 5 Years Off IS Tolerant |
| 229894_PM_s_at  | ISY1 /// RAB43 | ISY1 splicing factor homolog (S. cerevisiae) /// RAB43, member RAS oncogene family | 0.0001 | 1.91  | Normal up vs > 5 Years Off IS Tolerant   |
| 221536_PM_s_at  | LSG1           | large subunit GTPase 1 homolog (S. cerevisiae)                                     | 0.0001 | 1.84  | Normal up vs > 5 Years Off IS Tolerant   |
| 202804_PM_at    | ABCC1          | ATP-binding cassette, sub-family C (CFTR/MRP), member 1                            | 0.0001 | 1.35  | Normal up vs > 5 Years Off IS Tolerant   |
| 203778_PM_at    | MANBA          | mannosidase, beta A, lysosomal                                                     | 0.0001 | -1.43 | Normal down vs > 5 Years Off IS Tolerant |
| 218244_PM_at    | NOL8           | nucleolar protein 8                                                                | 0.0001 | 1.53  | Normal up vs > 5 Years Off IS Tolerant   |
| 239105_PM_at    | ---            | ---                                                                                | 0.0001 | 2.04  | Normal up vs > 5 Years Off IS Tolerant   |
| 240150_PM_at    | ---            | ---                                                                                | 0.0001 | -1.42 | Normal down vs > 5 Years Off IS Tolerant |
| 230580_PM_at    | ---            | ---                                                                                | 0.0001 | 1.60  | Normal up vs > 5 Years Off IS Tolerant   |
| 1552295_PM_a_at | SLC39A13       | solute carrier family 39 (zinc transporter), member 13                             | 0.0001 | 1.50  | Normal up vs > 5 Years Off IS Tolerant   |
| 1557605_PM_a_at | LOC401312      | hypothetical LOC401312                                                             | 0.0001 | -1.56 | Normal down vs > 5 Years Off IS Tolerant |
| 205079_PM_s_at  | MPDZ           | multiple PDZ domain protein                                                        | 0.0001 | -1.78 | Normal down vs > 5 Years Off IS Tolerant |
| 202315_PM_s_at  | BCR            | breakpoint cluster region                                                          | 0.0001 | 2.33  | Normal up vs > 5 Years Off IS Tolerant   |
| 236422_PM_at    | ---            | ---                                                                                | 0.0001 | -3.04 | Normal down vs > 5 Years Off IS Tolerant |
| 208820_PM_at    | PTK2           | PTK2 protein tyrosine kinase 2                                                     | 0.0001 | 1.90  | Normal up vs > 5 Years Off IS Tolerant   |

|                 |           |                                                               |        |       |                                          |
|-----------------|-----------|---------------------------------------------------------------|--------|-------|------------------------------------------|
| 212947_PM_at    | SLC9A8    | solute carrier family 9 (sodium/hydrogen exchanger), member 8 | 0.0001 | 2.02  | Normal up vs > 5 Years Off IS Tolerant   |
| 242072_PM_at    | ---       | ---                                                           | 0.0001 | -1.35 | Normal down vs > 5 Years Off IS Tolerant |
| 208883_PM_at    | UBR5      | ubiquitin protein ligase E3 component n-recognin 5            | 0.0001 | 1.82  | Normal up vs > 5 Years Off IS Tolerant   |
| 1560946_PM_at   | ---       | ---                                                           | 0.0001 | -1.51 | Normal down vs > 5 Years Off IS Tolerant |
| 225657_PM_at    | LOC152217 | hypothetical LOC152217                                        | 0.0001 | 1.53  | Normal up vs > 5 Years Off IS Tolerant   |
| 226436_PM_at    | RASSF4    | Ras association (RalGDS/AF-6) domain family member 4          | 0.0001 | -1.96 | Normal down vs > 5 Years Off IS Tolerant |
| 225956_PM_at    | C5orf41   | chromosome 5 open reading frame 41                            | 0.0001 | 1.66  | Normal up vs > 5 Years Off IS Tolerant   |
| 218381_PM_s_at  | U2AF2     | U2 small nuclear RNA auxiliary factor 2                       | 0.0001 | 1.38  | Normal up vs > 5 Years Off IS Tolerant   |
| 236458_PM_at    | ---       | ---                                                           | 0.0001 | 1.76  | Normal up vs > 5 Years Off IS Tolerant   |
| 201018_PM_at    | EIF1AX    | eukaryotic translation initiation factor 1A, X-linked         | 0.0001 | 1.96  | Normal up vs > 5 Years Off IS Tolerant   |
| 223373_PM_s_at  | PLA2G12A  | phospholipase A2, group X1IA                                  | 0.0001 | 1.94  | Normal up vs > 5 Years Off IS Tolerant   |
| 223385_PM_at    | CYP2S1    | cytochrome P450, family 2, subfamily S, polypeptide 1         | 0.0001 | -1.49 | Normal down vs > 5 Years Off IS Tolerant |
| 223818_PM_s_at  | RSF1      | remodeling and spacing factor 1                               | 0.0001 | 1.85  | Normal up vs > 5 Years Off IS Tolerant   |
| 226811_PM_at    | FAM46C    | family with sequence similarity 46, member C                  | 0.0001 | 4.60  | Normal up vs > 5 Years Off IS Tolerant   |
| 205178_PM_s_at  | RBBP6     | retinoblastoma binding protein 6                              | 0.0001 | 1.53  | Normal up vs > 5 Years Off IS Tolerant   |
| 244156_PM_at    | ---       | ---                                                           | 0.0001 | -1.37 | Normal down vs > 5 Years Off IS Tolerant |
| 1566748_PM_at   | ---       | ---                                                           | 0.0001 | -1.43 | Normal down vs > 5 Years Off IS Tolerant |
| 222297_PM_x_at  | ---       | ---                                                           | 0.0001 | 1.23  | Normal up vs > 5 Years Off IS Tolerant   |
| 1560990_PM_a_at | ---       | ---                                                           | 0.0001 | -1.45 | Normal down vs > 5 Years Off IS Tolerant |

|                |                   |                                                                    |        |       |                                          |
|----------------|-------------------|--------------------------------------------------------------------|--------|-------|------------------------------------------|
| 203263_PM_s_at | ARHGEF9           | Cdc42 guanine nucleotide exchange factor (GEF) 9                   | 0.0001 | 1.78  | Normal up vs > 5 Years Off IS Tolerant   |
| 212758_PM_s_at | ZEB1              | zinc finger E-box binding homeobox 1                               | 0.0001 | 2.04  | Normal up vs > 5 Years Off IS Tolerant   |
| 244487_PM_at   | NCK1              | NCK adaptor protein 1                                              | 0.0001 | 2.52  | Normal up vs > 5 Years Off IS Tolerant   |
| 229357_PM_at   | ADAMTS5           | ADAM metalloproteinase with thrombospondin type 1 motif, 5         | 0.0001 | -1.68 | Normal down vs > 5 Years Off IS Tolerant |
| 241762_PM_at   | ---               | ---                                                                | 0.0001 | 2.91  | Normal up vs > 5 Years Off IS Tolerant   |
| 225775_PM_at   | TSPAN33           | tetraspanin 33                                                     | 0.0001 | 2.03  | Normal up vs > 5 Years Off IS Tolerant   |
| 204328_PM_at   | TMC6              | transmembrane channel-like 6                                       | 0.0001 | 1.49  | Normal up vs > 5 Years Off IS Tolerant   |
| 231038_PM_s_at | ---               | ---                                                                | 0.0001 | -1.84 | Normal down vs > 5 Years Off IS Tolerant |
| 205708_PM_s_at | TRPM2             | transient receptor potential cation channel, subfamily M, member 2 | 0.0001 | -1.67 | Normal down vs > 5 Years Off IS Tolerant |
| 206725_PM_x_at | BMP1              | bone morphogenetic protein 1                                       | 0.0001 | -1.64 | Normal down vs > 5 Years Off IS Tolerant |
| 232693_PM_s_at | FBXO16 /// ZNF395 | F-box protein 16 /// zinc finger protein 395                       | 0.0001 | 1.87  | Normal up vs > 5 Years Off IS Tolerant   |
| 230753_PM_at   | PATL2             | protein associated with topoisomerase II homolog 2 (yeast)         | 0.0001 | 2.26  | Normal up vs > 5 Years Off IS Tolerant   |
| 240500_PM_at   | LOC100132369      | Hypothetical LOC100132369                                          | 0.0001 | -1.35 | Normal down vs > 5 Years Off IS Tolerant |
| 210755_PM_at   | HGF               | hepatocyte growth factor (hepapoietin A; scatter factor)           | 0.0001 | -1.83 | Normal down vs > 5 Years Off IS Tolerant |
| 224711_PM_at   | YY1               | YY1 transcription factor                                           | 0.0001 | 1.51  | Normal up vs > 5 Years Off IS Tolerant   |
| 203410_PM_at   | AP3M2             | adaptor-related protein complex 3, mu 2 subunit                    | 0.0001 | 2.11  | Normal up vs > 5 Years Off IS Tolerant   |
| 208661_PM_s_at | TTC3              | tetratricopeptide repeat domain 3                                  | 0.0001 | 1.47  | Normal up vs > 5 Years Off IS Tolerant   |
| 205361_PM_s_at | PFDN4             | prefoldin subunit 4                                                | 0.0001 | 1.64  | Normal up vs > 5 Years Off IS Tolerant   |
| 216042_PM_at   | TNFRSF25          | tumor necrosis factor receptor superfamily, member 25              | 0.0001 | 1.73  | Normal up vs > 5 Years Off IS Tolerant   |



|                |                        |                                                                                            |        |       |                                          |
|----------------|------------------------|--------------------------------------------------------------------------------------------|--------|-------|------------------------------------------|
| 207842_PM_s_at | CASC3                  | cancer susceptibility candidate 3                                                          | 0.0001 | 1.40  | Normal up vs > 5 Years Off IS Tolerant   |
| 241637_PM_at   | ---                    | ---                                                                                        | 0.0001 | -1.64 | Normal down vs > 5 Years Off IS Tolerant |
| 224673_PM_at   | LENG8                  | leukocyte receptor cluster (LRC) member 8                                                  | 0.0001 | 1.82  | Normal up vs > 5 Years Off IS Tolerant   |
| 229394_PM_s_at | GRLF1                  | glucocorticoid receptor DNA binding factor 1                                               | 0.0001 | 1.75  | Normal up vs > 5 Years Off IS Tolerant   |
| 244555_PM_at   | ---                    | ---                                                                                        | 0.0001 | 2.05  | Normal up vs > 5 Years Off IS Tolerant   |
| 215954_PM_s_at | C19orf29               | chromosome 19 open reading frame 29                                                        | 0.0001 | 1.47  | Normal up vs > 5 Years Off IS Tolerant   |
| 226310_PM_at   | RICTOR                 | RPTOR independent companion of MTOR, complex 2                                             | 0.0001 | 2.46  | Normal up vs > 5 Years Off IS Tolerant   |
| 240990_PM_at   | ---                    | ---                                                                                        | 0.0001 | 2.44  | Normal up vs > 5 Years Off IS Tolerant   |
| 200031_PM_s_at | RPS11                  | ribosomal protein S11                                                                      | 0.0001 | 1.13  | Normal up vs > 5 Years Off IS Tolerant   |
| 203646_PM_at   | FDX1                   | ferredoxin 1                                                                               | 0.0001 | 1.75  | Normal up vs > 5 Years Off IS Tolerant   |
| 1564504_PM_at  | ACCN5                  | amiloride-sensitive cation channel 5, intestinal                                           | 0.0001 | -1.65 | Normal down vs > 5 Years Off IS Tolerant |
| 202838_PM_at   | FUCA1                  | fucosidase, alpha-L- 1, tissue                                                             | 0.0001 | -1.84 | Normal down vs > 5 Years Off IS Tolerant |
| 238682_PM_at   | CCDC96                 | coiled-coil domain containing 96                                                           | 0.0001 | 1.62  | Normal up vs > 5 Years Off IS Tolerant   |
| 212828_PM_at   | SYNJ2                  | synaptojanin 2                                                                             | 0.0001 | 2.07  | Normal up vs > 5 Years Off IS Tolerant   |
| 1562812_PM_at  | C10orf44               | Chromosome 10 open reading frame 44                                                        | 0.0001 | -1.63 | Normal down vs > 5 Years Off IS Tolerant |
| 223514_PM_at   | CARD11                 | caspase recruitment domain family, member 11                                               | 0.0001 | 1.51  | Normal up vs > 5 Years Off IS Tolerant   |
| 207856_PM_s_at | LOC150776 ///<br>SMPD4 | sphingomyelin phosphodiesterase 4, neutral membrane<br>pseudogene /// sphingomyelin phosph | 0.0001 | 1.78  | Normal up vs > 5 Years Off IS Tolerant   |
| 223340_PM_at   | ATL1                   | atlastin GTPase 1                                                                          | 0.0001 | 1.90  | Normal up vs > 5 Years Off IS Tolerant   |
| 209326_PM_at   | SLC35A2                | solute carrier family 35 (UDP-galactose transporter),<br>member A2                         | 0.0001 | 1.69  | Normal up vs > 5 Years Off IS Tolerant   |

|                 |         |                                                                              |        |       |                                          |
|-----------------|---------|------------------------------------------------------------------------------|--------|-------|------------------------------------------|
| 218184_PM_at    | TULP4   | tubby like protein 4                                                         | 0.0001 | 1.63  | Normal up vs > 5 Years Off IS Tolerant   |
| 209889_PM_at    | SEC31B  | SEC31 homolog B (S. cerevisiae)                                              | 0.0001 | 1.69  | Normal up vs > 5 Years Off IS Tolerant   |
| 221500_PM_s_at  | STX16   | syntaxin 16                                                                  | 0.0002 | 1.36  | Normal up vs > 5 Years Off IS Tolerant   |
| 219387_PM_at    | CCDC88A | coiled-coil domain containing 88A                                            | 0.0002 | -2.19 | Normal down vs > 5 Years Off IS Tolerant |
| 218647_PM_s_at  | YRDC    | yrdC domain containing (E. coli)                                             | 0.0002 | 2.02  | Normal up vs > 5 Years Off IS Tolerant   |
| 228052_PM_x_at  | TCF3    | transcription factor 3 (E2A immunoglobulin enhancer binding factors E12/E47) | 0.0002 | -1.38 | Normal down vs > 5 Years Off IS Tolerant |
| 210249_PM_s_at  | NCOA1   | nuclear receptor coactivator 1                                               | 0.0002 | 1.36  | Normal up vs > 5 Years Off IS Tolerant   |
| 218398_PM_at    | MRPS30  | mitochondrial ribosomal protein S30                                          | 0.0002 | 1.99  | Normal up vs > 5 Years Off IS Tolerant   |
| 1561041_PM_at   | TNRC6C  | trinucleotide repeat containing 6C                                           | 0.0002 | 1.61  | Normal up vs > 5 Years Off IS Tolerant   |
| 204036_PM_at    | LPAR1   | lysophosphatidic acid receptor 1                                             | 0.0002 | -2.70 | Normal down vs > 5 Years Off IS Tolerant |
| 209569_PM_x_at  | D4S234E | DNA segment on chromosome 4 (unique) 234 expressed sequence                  | 0.0002 | 2.32  | Normal up vs > 5 Years Off IS Tolerant   |
| 225505_PM_s_at  | FAM113A | family with sequence similarity 113, member A                                | 0.0002 | 1.57  | Normal up vs > 5 Years Off IS Tolerant   |
| 239196_PM_at    | ANKRD22 | ankyrin repeat domain 22                                                     | 0.0002 | -1.66 | Normal down vs > 5 Years Off IS Tolerant |
| 236280_PM_at    | ---     | ---                                                                          | 0.0002 | 2.25  | Normal up vs > 5 Years Off IS Tolerant   |
| 218278_PM_at    | WDR74   | WD repeat domain 74                                                          | 0.0002 | 1.50  | Normal up vs > 5 Years Off IS Tolerant   |
| 224627_PM_at    | GBA2    | glucosidase, beta (bile acid) 2                                              | 0.0002 | -1.54 | Normal down vs > 5 Years Off IS Tolerant |
| 1558608_PM_a_at | PAPPA   | pregnancy-associated plasma protein A, pappalysin 1                          | 0.0002 | -1.37 | Normal down vs > 5 Years Off IS Tolerant |
| 1565306_PM_a_at | SLC8A1  | solute carrier family 8 (sodium/calcium exchanger), member 1                 | 0.0002 | -1.77 | Normal down vs > 5 Years Off IS Tolerant |
| 238468_PM_at    | TNRC6B  | trinucleotide repeat containing 6B                                           | 0.0002 | 1.68  | Normal up vs > 5 Years Off IS Tolerant   |

|                 |                      |                                                                          |        |       |                                          |
|-----------------|----------------------|--------------------------------------------------------------------------|--------|-------|------------------------------------------|
| 206484_PM_s_at  | XPNPEP2              | X-prolyl aminopeptidase (aminopeptidase P) 2, membrane-bound             | 0.0002 | -1.40 | Normal down vs > 5 Years Off IS Tolerant |
| 227085_PM_at    | H2AFV                | H2A histone family, member V                                             | 0.0002 | 1.81  | Normal up vs > 5 Years Off IS Tolerant   |
| 1553328_PM_a_at | SLC18A2              | solute carrier family 18 (vesicular monoamine), member 2                 | 0.0002 | -1.51 | Normal down vs > 5 Years Off IS Tolerant |
| 208669_PM_s_at  | EID1                 | EP300 interacting inhibitor of differentiation 1                         | 0.0002 | 1.73  | Normal up vs > 5 Years Off IS Tolerant   |
| 221759_PM_at    | G6PC3                | glucose 6 phosphatase, catalytic, 3                                      | 0.0002 | -1.49 | Normal down vs > 5 Years Off IS Tolerant |
| 229404_PM_at    | TWIST2               | twist homolog 2 (Drosophila)                                             | 0.0002 | -1.40 | Normal down vs > 5 Years Off IS Tolerant |
| 229066_PM_at    | ---                  | ---                                                                      | 0.0002 | -1.87 | Normal down vs > 5 Years Off IS Tolerant |
| 210474_PM_s_at  | CDK11A ///<br>CDK11B | cyclin-dependent kinase 11A /// cyclin-dependent kinase 11B              | 0.0002 | 1.81  | Normal up vs > 5 Years Off IS Tolerant   |
| 213347_PM_x_at  | RPS4X                | ribosomal protein S4, X-linked                                           | 0.0002 | 1.25  | Normal up vs > 5 Years Off IS Tolerant   |
| 216977_PM_x_at  | SNRPA1               | small nuclear ribonucleoprotein polypeptide A'                           | 0.0002 | 1.45  | Normal up vs > 5 Years Off IS Tolerant   |
| 210471_PM_s_at  | KCNAB1               | potassium voltage-gated channel, shaker-related subfamily, beta member 1 | 0.0002 | -1.66 | Normal down vs > 5 Years Off IS Tolerant |
| 227325_PM_at    | PRR24                | proline rich 24                                                          | 0.0002 | 1.87  | Normal up vs > 5 Years Off IS Tolerant   |
| 237237_PM_at    | ---                  | ---                                                                      | 0.0002 | -1.53 | Normal down vs > 5 Years Off IS Tolerant |
| 203288_PM_at    | KIAA0355             | KIAA0355                                                                 | 0.0002 | 1.94  | Normal up vs > 5 Years Off IS Tolerant   |
| 209158_PM_s_at  | CYTH2                | cytohesin 2                                                              | 0.0002 | 1.67  | Normal up vs > 5 Years Off IS Tolerant   |
| 218149_PM_s_at  | ZNF395               | zinc finger protein 395                                                  | 0.0002 | 1.72  | Normal up vs > 5 Years Off IS Tolerant   |
| 34221_PM_at     | HMGXB3               | HMG box domain containing 3                                              | 0.0002 | 1.34  | Normal up vs > 5 Years Off IS Tolerant   |
| 1561658_PM_at   | ---                  | ---                                                                      | 0.0002 | -1.40 | Normal down vs > 5 Years Off IS Tolerant |
| 204269_PM_at    | PIM2                 | pim-2 oncogene                                                           | 0.0002 | 1.89  | Normal up vs > 5 Years Off IS Tolerant   |
| 1554539_PM_a_at | RHOF                 | ras homolog gene family, member F (in filopodia)                         | 0.0002 | 1.95  | Normal up vs > 5 Years Off IS Tolerant   |
| 206095_PM_s_at  | SRSF10               | serine/arginine-rich splicing factor 10                                  | 0.0002 | 1.51  | Normal up vs > 5 Years Off IS Tolerant   |

|                 |                   |                                                                        |        |       |                                          |
|-----------------|-------------------|------------------------------------------------------------------------|--------|-------|------------------------------------------|
| 224818_PM_at    | SORT1             | sortilin 1                                                             | 0.0002 | -1.83 | Normal down vs > 5 Years Off IS Tolerant |
| 1555765_PM_a_at | GNG4              | guanine nucleotide binding protein (G protein), gamma 4                | 0.0002 | -1.44 | Normal down vs > 5 Years Off IS Tolerant |
| 227356_PM_at    | ---               | ---                                                                    | 0.0002 | 1.81  | Normal up vs > 5 Years Off IS Tolerant   |
| 201230_PM_s_at  | ARIH2             | ariadne homolog 2 (Drosophila)                                         | 0.0002 | 1.39  | Normal up vs > 5 Years Off IS Tolerant   |
| 205559_PM_s_at  | PCSK5             | proprotein convertase subtilisin/kexin type 5                          | 0.0002 | 1.64  | Normal up vs > 5 Years Off IS Tolerant   |
| 223584_PM_s_at  | KBTD2             | kelch repeat and BTB (POZ) domain containing 2                         | 0.0002 | 3.27  | Normal up vs > 5 Years Off IS Tolerant   |
| 202584_PM_at    | NFX1              | nuclear transcription factor, X-box binding 1                          | 0.0002 | 1.59  | Normal up vs > 5 Years Off IS Tolerant   |
| 228580_PM_at    | HTRA3             | HtrA serine peptidase 3                                                | 0.0002 | -1.54 | Normal down vs > 5 Years Off IS Tolerant |
| 202652_PM_at    | APBB1             | amyloid beta (A4) precursor protein-binding, family B, member 1 (Fe65) | 0.0002 | 1.45  | Normal up vs > 5 Years Off IS Tolerant   |
| 202697_PM_at    | NUDT21            | nudix (nucleoside diphosphate linked moiety X)-type motif 21           | 0.0002 | 2.03  | Normal up vs > 5 Years Off IS Tolerant   |
| 217336_PM_at    | RPS10 /// RPS10P7 | ribosomal protein S10 /// ribosomal protein S10 pseudogene 7           | 0.0002 | 1.74  | Normal up vs > 5 Years Off IS Tolerant   |
| 1553566_PM_at   | C12orf53          | chromosome 12 open reading frame 53                                    | 0.0002 | -1.47 | Normal down vs > 5 Years Off IS Tolerant |
| 224871_PM_at    | TPRG1L            | tumor protein p63 regulated 1-like                                     | 0.0002 | 1.95  | Normal up vs > 5 Years Off IS Tolerant   |
| 226838_PM_at    | TTC32             | tetratricopeptide repeat domain 32                                     | 0.0002 | 1.72  | Normal up vs > 5 Years Off IS Tolerant   |
| 227551_PM_at    | FAM108B1          | family with sequence similarity 108, member B1                         | 0.0002 | 1.69  | Normal up vs > 5 Years Off IS Tolerant   |
| 238959_PM_at    | LARP4             | La ribonucleoprotein domain family, member 4                           | 0.0002 | -1.54 | Normal down vs > 5 Years Off IS Tolerant |
| 221604_PM_s_at  | PEX16             | peroxisomal biogenesis factor 16                                       | 0.0002 | 1.77  | Normal up vs > 5 Years Off IS Tolerant   |
| 242021_PM_at    | XBP1              | X-box binding protein 1                                                | 0.0002 | -1.95 | Normal down vs > 5 Years Off IS Tolerant |
| 244431_PM_at    | KILLIN            | killin protein                                                         | 0.0002 | -1.51 | Normal down vs > 5 Years Off IS Tolerant |
| 239783_PM_at    | ---               | ---                                                                    | 0.0002 | 1.74  | Normal up vs > 5 Years Off IS Tolerant   |
| 242456_PM_at    | MRE11A            | MRE11 meiotic recombination 11 homolog A (S. cerevisiae)               | 0.0002 | 1.44  | Normal up vs > 5 Years Off IS Tolerant   |
| 238063_PM_at    | TMEM154           | transmembrane protein 154                                              | 0.0002 | -1.64 | Normal down vs > 5 Years Off IS Tolerant |
| 1569393_PM_at   | MGC15885          | hypothetical protein MGC15885                                          | 0.0002 | -1.54 | Normal down vs > 5 Years Off IS Tolerant |
| 1561140_PM_at   | ---               | ---                                                                    | 0.0002 | -1.35 | Normal down vs > 5 Years Off IS Tolerant |
| 228549_PM_at    | ---               | ---                                                                    | 0.0002 | 2.20  | Normal up vs > 5 Years Off IS Tolerant   |

|                 |                                                                               |                                                                                              |        |       |                                          |
|-----------------|-------------------------------------------------------------------------------|----------------------------------------------------------------------------------------------|--------|-------|------------------------------------------|
| 1558295_PM_a_at | PPFIA2                                                                        | protein tyrosine phosphatase, receptor type, f polypeptide (PTPRF), interacting protein      | 0.0002 | -1.68 | Normal down vs > 5 Years Off IS Tolerant |
| 1561477_PM_at   | CCDC144A                                                                      | coiled-coil domain containing 144A                                                           | 0.0002 | -2.17 | Normal down vs > 5 Years Off IS Tolerant |
| 223729_PM_at    | CECR2                                                                         | cat eye syndrome chromosome region, candidate 2                                              | 0.0002 | -1.53 | Normal down vs > 5 Years Off IS Tolerant |
| 1569525_PM_s_at | ---                                                                           | ---                                                                                          | 0.0002 | -1.72 | Normal down vs > 5 Years Off IS Tolerant |
| 222256_PM_s_at  | JMJD7                                                                         | jumonji domain containing 7                                                                  | 0.0002 | 1.75  | Normal up vs > 5 Years Off IS Tolerant   |
| 226883_PM_at    | ---                                                                           | ---                                                                                          | 0.0002 | 1.58  | Normal up vs > 5 Years Off IS Tolerant   |
| 206433_PM_s_at  | SPOCK3                                                                        | sparc/osteonectin, cwcv and kazal-like domains proteoglycan (testican) 3                     | 0.0002 | -1.73 | Normal down vs > 5 Years Off IS Tolerant |
| 203624_PM_at    | AKAP17A                                                                       | A kinase (PRKA) anchor protein 17A                                                           | 0.0002 | 1.31  | Normal up vs > 5 Years Off IS Tolerant   |
| 230926_PM_s_at  | ODF2L                                                                         | outer dense fiber of sperm tails 2-like                                                      | 0.0002 | 2.07  | Normal up vs > 5 Years Off IS Tolerant   |
| 213166_PM_x_at  | MZT2A                                                                         | mitotic spindle organizing protein 2A                                                        | 0.0002 | 1.71  | Normal up vs > 5 Years Off IS Tolerant   |
| 204974_PM_at    | RAB3A                                                                         | RAB3A, member RAS oncogene family                                                            | 0.0002 | -1.51 | Normal down vs > 5 Years Off IS Tolerant |
| 35820_PM_at     | GM2A                                                                          | GM2 ganglioside activator                                                                    | 0.0002 | -1.96 | Normal down vs > 5 Years Off IS Tolerant |
| 222977_PM_at    | SURF4                                                                         | surfeit 4                                                                                    | 0.0002 | 1.67  | Normal up vs > 5 Years Off IS Tolerant   |
| 230599_PM_at    | ---                                                                           | ---                                                                                          | 0.0002 | 2.47  | Normal up vs > 5 Years Off IS Tolerant   |
| 236809_PM_at    | ---                                                                           | ---                                                                                          | 0.0002 | -2.45 | Normal down vs > 5 Years Off IS Tolerant |
| 201837_PM_s_at  | SUPT7L                                                                        | suppressor of Ty 7 (S. cerevisiae)-like                                                      | 0.0002 | 1.43  | Normal up vs > 5 Years Off IS Tolerant   |
| 1568609_PM_s_at | FAM91A2 ///<br>FLJ39739 ///<br>LOC100286793 ///<br>LOC728855 ///<br>LOC728875 | family with sequence similarity 91, member A2 ///<br>hypothetical FLJ39739 /// hypotheticala | 0.0002 | 1.89  | Normal up vs > 5 Years Off IS Tolerant   |
| 1565875_PM_at   | ---                                                                           | ---                                                                                          | 0.0002 | 1.46  | Normal up vs > 5 Years Off IS Tolerant   |
| 221377_PM_s_at  | RBPJL                                                                         | recombination signal binding protein for immunoglobulin kappa J region-like                  | 0.0002 | -1.43 | Normal down vs > 5 Years Off IS Tolerant |
| 219151_PM_s_at  | RABL2A /// RABL2B                                                             | RAB, member of RAS oncogene family-like 2A /// RAB, member of RAS oncogene family-like       | 0.0002 | 1.90  | Normal up vs > 5 Years Off IS Tolerant   |
| 217224_PM_at    | ---                                                                           | ---                                                                                          | 0.0002 | -1.42 | Normal down vs > 5 Years Off IS Tolerant |
| 244581_PM_at    | ---                                                                           | ---                                                                                          | 0.0002 | 2.07  | Normal up vs > 5 Years Off IS Tolerant   |
| 229806_PM_at    | QRICH1                                                                        | Glutamine-rich 1                                                                             | 0.0002 | 1.67  | Normal up vs > 5 Years Off IS Tolerant   |
| 217915_PM_s_at  | RSL24D1                                                                       | ribosomal L24 domain containing 1                                                            | 0.0002 | 1.48  | Normal up vs > 5 Years Off IS Tolerant   |

|                 |              |                                                                |        |       |                                          |
|-----------------|--------------|----------------------------------------------------------------|--------|-------|------------------------------------------|
| 226234_PM_at    | GDF11        | growth differentiation factor 11                               | 0.0002 | 1.47  | Normal up vs > 5 Years Off IS Tolerant   |
| 241432_PM_at    | ---          | ---                                                            | 0.0002 | -1.49 | Normal down vs > 5 Years Off IS Tolerant |
| 231203_PM_at    | LOC100505478 | hypothetical protein LOC100505478                              | 0.0002 | -1.38 | Normal down vs > 5 Years Off IS Tolerant |
| 212536_PM_at    | ATP11B       | ATPase, class VI, type 11B                                     | 0.0002 | 1.53  | Normal up vs > 5 Years Off IS Tolerant   |
| 1569331_PM_at   | ---          | ---                                                            | 0.0002 | -1.28 | Normal down vs > 5 Years Off IS Tolerant |
| 218265_PM_at    | SECISBP2     | SECIS binding protein 2                                        | 0.0002 | 1.45  | Normal up vs > 5 Years Off IS Tolerant   |
| 1565407_PM_at   | LHX9         | LIM homeobox 9                                                 | 0.0002 | -1.38 | Normal down vs > 5 Years Off IS Tolerant |
| 1557025_PM_a_at | ---          | ---                                                            | 0.0002 | -1.54 | Normal down vs > 5 Years Off IS Tolerant |
| 223894_PM_s_at  | AKTIP        | AKT interacting protein                                        | 0.0002 | 1.98  | Normal up vs > 5 Years Off IS Tolerant   |
| 240228_PM_at    | CSMD3        | CUB and Sushi multiple domains 3                               | 0.0002 | -1.41 | Normal down vs > 5 Years Off IS Tolerant |
| 201369_PM_s_at  | ZFP36L2      | zinc finger protein 36, C3H type-like 2                        | 0.0002 | 1.63  | Normal up vs > 5 Years Off IS Tolerant   |
| 1558345_PM_a_at | LOC439911    | hypothetical LOC439911                                         | 0.0002 | 2.32  | Normal up vs > 5 Years Off IS Tolerant   |
| 227988_PM_s_at  | VPS13A       | vacuolar protein sorting 13 homolog A ( <i>S. cerevisiae</i> ) | 0.0002 | 2.40  | Normal up vs > 5 Years Off IS Tolerant   |
| 240260_PM_at    | ---          | ---                                                            | 0.0002 | 2.43  | Normal up vs > 5 Years Off IS Tolerant   |
| 217034_PM_at    | ---          | ---                                                            | 0.0002 | -1.34 | Normal down vs > 5 Years Off IS Tolerant |
| 227019_PM_at    | C1orf226     | chromosome 1 open reading frame 226                            | 0.0002 | -1.39 | Normal down vs > 5 Years Off IS Tolerant |
| 1558765_PM_a_at | ---          | ---                                                            | 0.0002 | -1.54 | Normal down vs > 5 Years Off IS Tolerant |
| 240998_PM_at    | ---          | ---                                                            | 0.0002 | -1.42 | Normal down vs > 5 Years Off IS Tolerant |
| 1568920_PM_at   | ---          | ---                                                            | 0.0002 | -2.12 | Normal down vs > 5 Years Off IS Tolerant |
| 237172_PM_at    | ---          | ---                                                            | 0.0002 | 1.72  | Normal up vs > 5 Years Off IS Tolerant   |
| 226641_PM_at    | ANKRD44      | ankyrin repeat domain 44                                       | 0.0002 | 1.41  | Normal up vs > 5 Years Off IS Tolerant   |
| 244843_PM_x_at  | ---          | ---                                                            | 0.0002 | -1.43 | Normal down vs > 5 Years Off IS Tolerant |
| 223475_PM_at    | CRISPLD1     | cysteine-rich secretory protein LCCL domain containing 1       | 0.0002 | -1.65 | Normal down vs > 5 Years Off IS Tolerant |
| 220216_PM_at    | C8orf44      | chromosome 8 open reading frame 44                             | 0.0002 | -1.45 | Normal down vs > 5 Years Off IS Tolerant |
| 218510_PM_x_at  | FAM134B      | family with sequence similarity 134, member B                  | 0.0002 | 2.68  | Normal up vs > 5 Years Off IS Tolerant   |

|                |              |                                                               |        |       |                                          |
|----------------|--------------|---------------------------------------------------------------|--------|-------|------------------------------------------|
| 231969_PM_at   | STOX2        | storkhead box 2                                               | 0.0002 | -1.54 | Normal down vs > 5 Years Off IS Tolerant |
| 1556589_PM_at  | ---          | ---                                                           | 0.0002 | -1.94 | Normal down vs > 5 Years Off IS Tolerant |
| 206337_PM_at   | CCR7         | chemokine (C-C motif) receptor 7                              | 0.0002 | 3.81  | Normal up vs > 5 Years Off IS Tolerant   |
| 208262_PM_x_at | MEFV         | Mediterranean fever                                           | 0.0002 | -2.99 | Normal down vs > 5 Years Off IS Tolerant |
| 212454_PM_x_at | HNRPDL       | heterogeneous nuclear ribonucleoprotein D-like                | 0.0002 | 1.59  | Normal up vs > 5 Years Off IS Tolerant   |
| 221083_PM_at   | KCNQ4        | potassium voltage-gated channel, KQT-like subfamily, member 4 | 0.0002 | -1.37 | Normal down vs > 5 Years Off IS Tolerant |
| 218081_PM_at   | C20orf27     | chromosome 20 open reading frame 27                           | 0.0002 | -1.73 | Normal down vs > 5 Years Off IS Tolerant |
| 202765_PM_s_at | FBN1         | fibrillin 1                                                   | 0.0002 | -1.40 | Normal down vs > 5 Years Off IS Tolerant |
| 228765_PM_at   | GTF2IRD2     | GTF2I repeat domain containing 2                              | 0.0002 | 1.73  | Normal up vs > 5 Years Off IS Tolerant   |
| 207324_PM_s_at | DSC1         | desmocollin 1                                                 | 0.0002 | 2.10  | Normal up vs > 5 Years Off IS Tolerant   |
| 211260_PM_at   | BMP7         | bone morphogenetic protein 7                                  | 0.0002 | -1.76 | Normal down vs > 5 Years Off IS Tolerant |
| 207839_PM_s_at | TMEM8B       | transmembrane protein 8B                                      | 0.0002 | 1.45  | Normal up vs > 5 Years Off IS Tolerant   |
| 222785_PM_x_at | C11orf1      | chromosome 11 open reading frame 1                            | 0.0002 | 2.56  | Normal up vs > 5 Years Off IS Tolerant   |
| 201953_PM_at   | CIB1         | calcium and integrin binding 1 (calmyrin)                     | 0.0002 | 1.48  | Normal up vs > 5 Years Off IS Tolerant   |
| 203080_PM_s_at | BAZ2B        | bromodomain adjacent to zinc finger domain, 2B                | 0.0002 | -1.61 | Normal down vs > 5 Years Off IS Tolerant |
| 208117_PM_s_at | LAS1L        | LAS1-like ( <i>S. cerevisiae</i> )                            | 0.0002 | 1.30  | Normal up vs > 5 Years Off IS Tolerant   |
| 238057_PM_at   | USP45        | ubiquitin specific peptidase 45                               | 0.0002 | 1.78  | Normal up vs > 5 Years Off IS Tolerant   |
| 237770_PM_at   | ---          | ---                                                           | 0.0002 | -1.94 | Normal down vs > 5 Years Off IS Tolerant |
| 1559579_PM_at  | LOC283688    | hypothetical LOC283688                                        | 0.0002 | -1.45 | Normal down vs > 5 Years Off IS Tolerant |
| 212614_PM_at   | ARID5B       | AT rich interactive domain 5B (MRF1-like)                     | 0.0002 | 2.03  | Normal up vs > 5 Years Off IS Tolerant   |
| 203184_PM_at   | FBN2         | fibrillin 2                                                   | 0.0002 | -2.37 | Normal down vs > 5 Years Off IS Tolerant |
| 204646_PM_at   | DPYD         | dihydropyrimidine dehydrogenase                               | 0.0002 | -1.65 | Normal down vs > 5 Years Off IS Tolerant |
| 230617_PM_at   | LOC100507675 | hypothetical LOC100507675                                     | 0.0002 | -1.45 | Normal down vs > 5 Years Off IS Tolerant |
| 241227_PM_at   | ---          | ---                                                           | 0.0002 | -1.99 | Normal down vs > 5 Years Off IS Tolerant |

|                 |                        |                                                                                         |        |       |                                          |
|-----------------|------------------------|-----------------------------------------------------------------------------------------|--------|-------|------------------------------------------|
| 1555378_PM_at   | DBF4B                  | DBF4 homolog B ( <i>S. cerevisiae</i> )                                                 | 0.0002 | -1.35 | Normal down vs > 5 Years Off IS Tolerant |
| 225544_PM_at    | TBX3                   | T-box 3                                                                                 | 0.0002 | -1.57 | Normal down vs > 5 Years Off IS Tolerant |
| 204038_PM_s_at  | LPAR1                  | lysophosphatidic acid receptor 1                                                        | 0.0002 | -1.46 | Normal down vs > 5 Years Off IS Tolerant |
| 229686_PM_at    | P2RY8                  | purinergic receptor P2Y, G-protein coupled, 8                                           | 0.0002 | 1.63  | Normal up vs > 5 Years Off IS Tolerant   |
| 224352_PM_s_at  | CFL2                   | cofilin 2 (muscle)                                                                      | 0.0002 | 2.70  | Normal up vs > 5 Years Off IS Tolerant   |
| 220486_PM_x_at  | TMEM164                | transmembrane protein 164                                                               | 0.0002 | -1.45 | Normal down vs > 5 Years Off IS Tolerant |
| 229829_PM_at    | C18orf18               | chromosome 18 open reading frame 18                                                     | 0.0002 | 1.83  | Normal up vs > 5 Years Off IS Tolerant   |
| 203457_PM_at    | STX7                   | syntaxin 7                                                                              | 0.0002 | -1.53 | Normal down vs > 5 Years Off IS Tolerant |
| 1568665_PM_at   | RNF103                 | ring finger protein 103                                                                 | 0.0002 | 2.41  | Normal up vs > 5 Years Off IS Tolerant   |
| 226344_PM_at    | ZMAT1                  | zinc finger, matrin-type 1                                                              | 0.0002 | 2.01  | Normal up vs > 5 Years Off IS Tolerant   |
| 214662_PM_at    | WDR43                  | WD repeat domain 43                                                                     | 0.0002 | 1.95  | Normal up vs > 5 Years Off IS Tolerant   |
| 202208_PM_s_at  | ARL4C                  | ADP-ribosylation factor-like 4C                                                         | 0.0002 | 2.13  | Normal up vs > 5 Years Off IS Tolerant   |
| 218316_PM_at    | TIMM9                  | translocase of inner mitochondrial membrane 9 homolog (yeast)                           | 0.0002 | 1.67  | Normal up vs > 5 Years Off IS Tolerant   |
| 219349_PM_s_at  | EXOC2                  | exocyst complex component 2                                                             | 0.0002 | 2.03  | Normal up vs > 5 Years Off IS Tolerant   |
| 202775_PM_s_at  | SFSWAP                 | splicing factor, suppressor of white-apricot homolog ( <i>Drosophila</i> )              | 0.0002 | 1.47  | Normal up vs > 5 Years Off IS Tolerant   |
| 218313_PM_s_at  | GALNT7                 | UDP-N-acetyl-alpha-D-galactosamine:polypeptide N-acetylgalactosaminyltransferase 7 (Gal | 0.0002 | -1.46 | Normal down vs > 5 Years Off IS Tolerant |
| 239163_PM_at    | UBE2B                  | ubiquitin-conjugating enzyme E2B (RAD6 homolog)                                         | 0.0002 | 2.02  | Normal up vs > 5 Years Off IS Tolerant   |
| 1552717_PM_s_at | CEP170 ///<br>CEP170P1 | centrosomal protein 170kDa /// centrosomal protein 170kDa pseudogene 1                  | 0.0002 | -1.71 | Normal down vs > 5 Years Off IS Tolerant |
| 202500_PM_at    | DNAJB2                 | DnaJ (Hsp40) homolog, subfamily B, member 2                                             | 0.0002 | 1.65  | Normal up vs > 5 Years Off IS Tolerant   |
| 219119_PM_at    | NAA38                  | N(alpha)-acetyltransferase 38, NatC auxiliary subunit                                   | 0.0002 | 1.64  | Normal up vs > 5 Years Off IS Tolerant   |
| 243450_PM_at    | ---                    | ---                                                                                     | 0.0002 | 2.16  | Normal up vs > 5 Years Off IS Tolerant   |
| 236470_PM_at    | ---                    | ---                                                                                     | 0.0002 | 2.25  | Normal up vs > 5 Years Off IS Tolerant   |
| 216220_PM_s_at  | ADORA1                 | adenosine A1 receptor                                                                   | 0.0002 | -1.53 | Normal down vs > 5 Years Off IS Tolerant |
| 210633_PM_x_at  | KRT10                  | keratin 10                                                                              | 0.0002 | 1.51  | Normal up vs > 5 Years Off IS Tolerant   |
| 221207_PM_s_at  | NBEA                   | neurobeachin                                                                            | 0.0002 | 1.67  | Normal up vs > 5 Years Off IS Tolerant   |
| 243434_PM_at    | ---                    | ---                                                                                     | 0.0002 | -1.64 | Normal down vs > 5 Years Off IS Tolerant |
| 203409_PM_at    | DDB2                   | damage-specific DNA binding protein 2, 48kDa                                            | 0.0002 | 1.74  | Normal up vs > 5 Years Off IS Tolerant   |



|                 |                 |                                                                                   |        |       |                                          |
|-----------------|-----------------|-----------------------------------------------------------------------------------|--------|-------|------------------------------------------|
| 1554584_PM_at   | LRRC48          | leucine rich repeat containing 48                                                 | 0.0002 | -1.36 | Normal down vs > 5 Years Off IS Tolerant |
| 240216_PM_at    | ---             | ---                                                                               | 0.0002 | 2.01  | Normal up vs > 5 Years Off IS Tolerant   |
| 208796_PM_s_at  | CCNG1           | cyclin G1                                                                         | 0.0002 | 1.68  | Normal up vs > 5 Years Off IS Tolerant   |
| 1561937_PM_x_at | ---             | ---                                                                               | 0.0002 | -1.83 | Normal down vs > 5 Years Off IS Tolerant |
| 225792_PM_at    | HOOK1           | hook homolog 1 (Drosophila)                                                       | 0.0002 | 2.45  | Normal up vs > 5 Years Off IS Tolerant   |
| 202042_PM_at    | HARS            | histidyl-tRNA synthetase                                                          | 0.0002 | 1.51  | Normal up vs > 5 Years Off IS Tolerant   |
| 228839_PM_s_at  | LOC642361       | hypothetical LOC642361                                                            | 0.0002 | 1.73  | Normal up vs > 5 Years Off IS Tolerant   |
| 220040_PM_x_at  | ZC4H2           | zinc finger, C4H2 domain containing                                               | 0.0002 | 1.51  | Normal up vs > 5 Years Off IS Tolerant   |
| 211783_PM_s_at  | MTA1            | metastasis associated 1                                                           | 0.0002 | 1.54  | Normal up vs > 5 Years Off IS Tolerant   |
| 225237_PM_s_at  | MSI2            | musashi homolog 2 (Drosophila)                                                    | 0.0002 | 2.20  | Normal up vs > 5 Years Off IS Tolerant   |
| 230156_PM_x_at  | CHD2            | Chromodomain helicase DNA binding protein 2                                       | 0.0002 | 1.71  | Normal up vs > 5 Years Off IS Tolerant   |
| 206042_PM_x_at  | SNRPN /// SNURF | small nuclear ribonucleoprotein polypeptide N ///<br>SNRPN upstream reading frame | 0.0002 | 1.82  | Normal up vs > 5 Years Off IS Tolerant   |
| 204000_PM_at    | GNB5            | guanine nucleotide binding protein (G protein), beta 5                            | 0.0002 | 1.82  | Normal up vs > 5 Years Off IS Tolerant   |
| 214789_PM_x_at  | SRSF8           | serine/arginine-rich splicing factor 8                                            | 0.0002 | 1.48  | Normal up vs > 5 Years Off IS Tolerant   |
| 216931_PM_at    | ---             | ---                                                                               | 0.0002 | -1.47 | Normal down vs > 5 Years Off IS Tolerant |
| 201229_PM_s_at  | ARIH2           | ariadne homolog 2 (Drosophila)                                                    | 0.0002 | 1.88  | Normal up vs > 5 Years Off IS Tolerant   |
| 214623_PM_at    | FBXW4P1         | F-box and WD repeat domain containing 4 pseudogene<br>1                           | 0.0002 | 1.77  | Normal up vs > 5 Years Off IS Tolerant   |
| 242778_PM_at    | LPXN            | leupaxin                                                                          | 0.0002 | 2.79  | Normal up vs > 5 Years Off IS Tolerant   |
| 1552372_PM_at   | C4orf33         | chromosome 4 open reading frame 33                                                | 0.0002 | -1.37 | Normal down vs > 5 Years Off IS Tolerant |
| 212156_PM_at    | VPS39           | vacuolar protein sorting 39 homolog (S. cerevisiae)                               | 0.0002 | 1.48  | Normal up vs > 5 Years Off IS Tolerant   |
| 217969_PM_at    | C11orf2         | chromosome 11 open reading frame 2                                                | 0.0002 | 1.43  | Normal up vs > 5 Years Off IS Tolerant   |
| 203386_PM_at    | TBC1D4          | TBC1 domain family, member 4                                                      | 0.0002 | 2.50  | Normal up vs > 5 Years Off IS Tolerant   |
| 215347_PM_at    | ---             | ---                                                                               | 0.0002 | -1.44 | Normal down vs > 5 Years Off IS Tolerant |
| 1553561_PM_at   | TAS2R50         | taste receptor, type 2, member 50                                                 | 0.0002 | -1.40 | Normal down vs > 5 Years Off IS Tolerant |
| 236022_PM_at    | MYO19           | myosin XIX                                                                        | 0.0002 | 2.11  | Normal up vs > 5 Years Off IS Tolerant   |
| 237189_PM_at    | LOC100506360    | hypothetical LOC100506360                                                         | 0.0002 | 2.43  | Normal up vs > 5 Years Off IS Tolerant   |
| 200864_PM_s_at  | RAB11A          | RAB11A, member RAS oncogene family                                                | 0.0002 | 1.93  | Normal up vs > 5 Years Off IS Tolerant   |
| 241323_PM_at    | ---             | ---                                                                               | 0.0002 | -1.74 | Normal down vs > 5 Years Off IS Tolerant |

|                 |                   |                                                                                     |        |       |                                          |
|-----------------|-------------------|-------------------------------------------------------------------------------------|--------|-------|------------------------------------------|
| 228057_PM_at    | DDIT4L            | DNA-damage-inducible transcript 4-like                                              | 0.0002 | -1.64 | Normal down vs > 5 Years Off IS Tolerant |
| 228105_PM_at    | ---               | ---                                                                                 | 0.0002 | 1.79  | Normal up vs > 5 Years Off IS Tolerant   |
| 213291_PM_s_at  | UBE3A             | ubiquitin protein ligase E3A                                                        | 0.0002 | 1.74  | Normal up vs > 5 Years Off IS Tolerant   |
| 203493_PM_s_at  | CEP57             | centrosomal protein 57kDa                                                           | 0.0002 | 2.18  | Normal up vs > 5 Years Off IS Tolerant   |
| 234575_PM_at    | ZNF71             | zinc finger protein 71                                                              | 0.0002 | -1.46 | Normal down vs > 5 Years Off IS Tolerant |
| 209331_PM_s_at  | MAX               | MYC associated factor X                                                             | 0.0002 | 1.53  | Normal up vs > 5 Years Off IS Tolerant   |
| 1566484_PM_at   | ---               | ---                                                                                 | 0.0002 | -1.39 | Normal down vs > 5 Years Off IS Tolerant |
| 1563546_PM_at   | ---               | ---                                                                                 | 0.0002 | -1.63 | Normal down vs > 5 Years Off IS Tolerant |
| 214661_PM_s_at  | NOP14             | NOP14 nucleolar protein homolog (yeast)                                             | 0.0002 | 1.49  | Normal up vs > 5 Years Off IS Tolerant   |
| 1565786_PM_x_at | FLJ45482          | hypothetical LOC645566                                                              | 0.0002 | -1.45 | Normal down vs > 5 Years Off IS Tolerant |
| 205095_PM_s_at  | ATP6V0A1          | ATPase, H+ transporting, lysosomal V0 subunit a1                                    | 0.0002 | -1.48 | Normal down vs > 5 Years Off IS Tolerant |
| 227131_PM_at    | MAP3K3            | mitogen-activated protein kinase kinase kinase 3                                    | 0.0002 | -1.38 | Normal down vs > 5 Years Off IS Tolerant |
| 232521_PM_at    | PCSK7             | proprotein convertase subtilisin/kexin type 7                                       | 0.0002 | 2.63  | Normal up vs > 5 Years Off IS Tolerant   |
| 230309_PM_at    | BHMT2             | betaine--homocysteine S-methyltransferase 2                                         | 0.0002 | -1.42 | Normal down vs > 5 Years Off IS Tolerant |
| 1563120_PM_at   | LOC100129029      | Hypothetical LOC100129029                                                           | 0.0002 | -1.48 | Normal down vs > 5 Years Off IS Tolerant |
| 225240_PM_s_at  | MSI2              | musashi homolog 2 (Drosophila)                                                      | 0.0002 | 1.76  | Normal up vs > 5 Years Off IS Tolerant   |
| 236260_PM_at    | LOC100287598      | hypothetical LOC100287598                                                           | 0.0002 | 2.18  | Normal up vs > 5 Years Off IS Tolerant   |
| 202767_PM_at    | ACP2              | acid phosphatase 2, lysosomal                                                       | 0.0002 | -1.86 | Normal down vs > 5 Years Off IS Tolerant |
| 1555247_PM_a_at | FNIP1 /// RAPGEF6 | folliculin interacting protein 1 /// Rap guanine nucleotide exchange factor (GEF) 6 | 0.0002 | 2.12  | Normal up vs > 5 Years Off IS Tolerant   |
| 233540_PM_s_at  | CDK5RAP2          | CDK5 regulatory subunit associated protein 2                                        | 0.0002 | 2.09  | Normal up vs > 5 Years Off IS Tolerant   |
| 225672_PM_at    | GOLGA2            | golgin A2                                                                           | 0.0002 | -1.53 | Normal down vs > 5 Years Off IS Tolerant |
| 239047_PM_at    | FAM122C           | family with sequence similarity 122C                                                | 0.0002 | 1.51  | Normal up vs > 5 Years Off IS Tolerant   |
| 236835_PM_at    | LOC645431         | hypothetical LOC645431                                                              | 0.0002 | 1.53  | Normal up vs > 5 Years Off IS Tolerant   |
| 222629_PM_at    | REV1              | REV1 homolog (S. cerevisiae)                                                        | 0.0002 | 2.03  | Normal up vs > 5 Years Off IS Tolerant   |
| 1563898_PM_at   | ---               | ---                                                                                 | 0.0002 | -1.52 | Normal down vs > 5 Years Off IS Tolerant |

|                 |                               |                                                                      |        |       |                                          |
|-----------------|-------------------------------|----------------------------------------------------------------------|--------|-------|------------------------------------------|
| 1562573_PM_at   | CYP17A1                       | cytochrome P450, family 17, subfamily A, polypeptide 1               | 0.0002 | -1.42 | Normal down vs > 5 Years Off IS Tolerant |
| 223021_PM_x_at  | VTA1                          | Vps20-associated 1 homolog ( <i>S. cerevisiae</i> )                  | 0.0002 | -1.53 | Normal down vs > 5 Years Off IS Tolerant |
| 1557151_PM_at   | TRIM31                        | Tripartite motif-containing 31                                       | 0.0002 | -1.32 | Normal down vs > 5 Years Off IS Tolerant |
| 212274_PM_at    | LPIN1                         | lipin 1                                                              | 0.0002 | 1.79  | Normal up vs > 5 Years Off IS Tolerant   |
| 1554250_PM_s_at | TRIM73                        | tripartite motif-containing 73                                       | 0.0002 | 1.69  | Normal up vs > 5 Years Off IS Tolerant   |
| 1563087_PM_at   | ---                           | ---                                                                  | 0.0002 | -1.65 | Normal down vs > 5 Years Off IS Tolerant |
| 213088_PM_s_at  | DNAJC9                        | DnaJ (Hsp40) homolog, subfamily C, member 9                          | 0.0002 | 1.78  | Normal up vs > 5 Years Off IS Tolerant   |
| 229253_PM_at    | THEM4                         | thioesterase superfamily member 4                                    | 0.0002 | 2.69  | Normal up vs > 5 Years Off IS Tolerant   |
| 243382_PM_at    | ---                           | ---                                                                  | 0.0002 | -1.35 | Normal down vs > 5 Years Off IS Tolerant |
| 238483_PM_at    | SSBP2                         | single-stranded DNA binding protein 2                                | 0.0002 | 1.76  | Normal up vs > 5 Years Off IS Tolerant   |
| 208195_PM_at    | TTN                           | titin                                                                | 0.0002 | 2.00  | Normal up vs > 5 Years Off IS Tolerant   |
| 228053_PM_s_at  | TOMM5                         | translocase of outer mitochondrial membrane 5 homolog (yeast)        | 0.0002 | 1.76  | Normal up vs > 5 Years Off IS Tolerant   |
| 237077_PM_at    | ---                           | ---                                                                  | 0.0002 | -1.72 | Normal down vs > 5 Years Off IS Tolerant |
| 230598_PM_at    | ---                           | ---                                                                  | 0.0002 | 2.19  | Normal up vs > 5 Years Off IS Tolerant   |
| 1563045_PM_at   | ---                           | ---                                                                  | 0.0002 | -1.51 | Normal down vs > 5 Years Off IS Tolerant |
| 226131_PM_s_at  | RPS16                         | ribosomal protein S16                                                | 0.0002 | 1.11  | Normal up vs > 5 Years Off IS Tolerant   |
| 213304_PM_at    | FAM179B                       | family with sequence similarity 179, member B                        | 0.0002 | 1.94  | Normal up vs > 5 Years Off IS Tolerant   |
| 224785_PM_at    | FAM100B                       | family with sequence similarity 100, member B                        | 0.0002 | 1.92  | Normal up vs > 5 Years Off IS Tolerant   |
| 212690_PM_at    | DDHD2                         | DDHD domain containing 2                                             | 0.0002 | 1.76  | Normal up vs > 5 Years Off IS Tolerant   |
| 229907_PM_at    | ---                           | ---                                                                  | 0.0002 | 2.35  | Normal up vs > 5 Years Off IS Tolerant   |
| 243891_PM_at    | ---                           | ---                                                                  | 0.0002 | -1.47 | Normal down vs > 5 Years Off IS Tolerant |
| 211841_PM_s_at  | TNFRSF25                      | tumor necrosis factor receptor superfamily, member 25                | 0.0002 | 2.54  | Normal up vs > 5 Years Off IS Tolerant   |
| 1554517_PM_x_at | LOC100288109 ///<br>LOC203274 | Hypothetical protein LOC100288109 /// Hypothetical protein LOC203274 | 0.0002 | -1.52 | Normal down vs > 5 Years Off IS Tolerant |
| 1554074_PM_s_at | SLFNL1                        | schlafen-like 1                                                      | 0.0002 | -1.52 | Normal down vs > 5 Years Off IS Tolerant |
| 229340_PM_at    | NKAPL                         | NFKB activating protein-like                                         | 0.0002 | -1.54 | Normal down vs > 5 Years Off IS Tolerant |
| 223674_PM_s_at  | CDC42SE1                      | CDC42 small effector 1                                               | 0.0003 | 2.81  | Normal up vs > 5 Years Off IS Tolerant   |

|                |          |                                                  |        |       |                                          |
|----------------|----------|--------------------------------------------------|--------|-------|------------------------------------------|
| 215693_PM_x_at | DDX27    | DEAD (Asp-Glu-Ala-Asp) box polypeptide 27        | 0.0003 | 1.46  | Normal up vs > 5 Years Off IS Tolerant   |
| 234760_PM_at   | ---      | ---                                              | 0.0003 | -1.38 | Normal down vs > 5 Years Off IS Tolerant |
| 1558177_PM_at  | TMEM229B | transmembrane protein 229B                       | 0.0003 | -1.59 | Normal down vs > 5 Years Off IS Tolerant |
| 213873_PM_at   | ---      | ---                                              | 0.0003 | -1.50 | Normal down vs > 5 Years Off IS Tolerant |
| 227134_PM_at   | SYTL1    | synaptotagmin-like 1                             | 0.0003 | 1.80  | Normal up vs > 5 Years Off IS Tolerant   |
| 221020_PM_s_at | SLC25A32 | solute carrier family 25, member 32              | 0.0003 | 1.98  | Normal up vs > 5 Years Off IS Tolerant   |
| 201826_PM_s_at | SCCPDH   | saccharopine dehydrogenase (putative)            | 0.0003 | -1.65 | Normal down vs > 5 Years Off IS Tolerant |
| 1564628_PM_at  | ---      | ---                                              | 0.0003 | -1.62 | Normal down vs > 5 Years Off IS Tolerant |
| 224603_PM_at   | ---      | ---                                              | 0.0003 | 1.62  | Normal up vs > 5 Years Off IS Tolerant   |
| 203810_PM_at   | DNAJB4   | DnaJ (Hsp40) homolog, subfamily B, member 4      | 0.0003 | 1.77  | Normal up vs > 5 Years Off IS Tolerant   |
| 221640_PM_s_at | LRDD     | leucine-rich repeats and death domain containing | 0.0003 | 1.63  | Normal up vs > 5 Years Off IS Tolerant   |
| 232125_PM_at   | ---      | ---                                              | 0.0003 | 1.80  | Normal up vs > 5 Years Off IS Tolerant   |
| 220659_PM_s_at | C7orf43  | chromosome 7 open reading frame 43               | 0.0003 | 1.46  | Normal up vs > 5 Years Off IS Tolerant   |
| 203497_PM_at   | MED1     | mediator complex subunit 1                       | 0.0003 | 1.63  | Normal up vs > 5 Years Off IS Tolerant   |
| 1562390_PM_at  | ---      | ---                                              | 0.0003 | -1.44 | Normal down vs > 5 Years Off IS Tolerant |
| 236554_PM_x_at | TMC8     | transmembrane channel-like 8                     | 0.0003 | 1.72  | Normal up vs > 5 Years Off IS Tolerant   |
| 1555311_PM_at  | ---      | ---                                              | 0.0003 | -1.59 | Normal down vs > 5 Years Off IS Tolerant |
| 226587_PM_at   | SNRPN    | small nuclear ribonucleoprotein polypeptide N    | 0.0003 | 2.87  | Normal up vs > 5 Years Off IS Tolerant   |
| 239381_PM_at   | KLK7     | kallikrein-related peptidase 7                   | 0.0003 | -1.24 | Normal down vs > 5 Years Off IS Tolerant |
| 216216_PM_at   | SLIT3    | slit homolog 3 (Drosophila)                      | 0.0003 | -1.30 | Normal down vs > 5 Years Off IS Tolerant |
| 219749_PM_at   | SH2D4A   | SH2 domain containing 4A                         | 0.0003 | -1.66 | Normal down vs > 5 Years Off IS Tolerant |
| 211970_PM_x_at | ACTG1    | actin, gamma 1                                   | 0.0003 | -1.18 | Normal down vs > 5 Years Off IS Tolerant |
| 213927_PM_at   | MAP3K9   | mitogen-activated protein kinase kinase kinase 9 | 0.0003 | 1.73  | Normal up vs > 5 Years Off IS Tolerant   |
| 215574_PM_at   | ---      | ---                                              | 0.0003 | -1.40 | Normal down vs > 5 Years Off IS Tolerant |
| 207672_PM_at   | ---      | ---                                              | 0.0003 | -1.30 | Normal down vs > 5 Years Off IS Tolerant |
| 223401_PM_at   | C17orf48 | chromosome 17 open reading frame 48              | 0.0003 | 1.74  | Normal up vs > 5 Years Off IS Tolerant   |

|                 |                        |                                                                                            |        |       |                                          |
|-----------------|------------------------|--------------------------------------------------------------------------------------------|--------|-------|------------------------------------------|
| 205762_PM_s_at  | DUS4L                  | dihydrouridine synthase 4-like ( <i>S. cerevisiae</i> )                                    | 0.0003 | 1.48  | Normal up vs > 5 Years Off IS Tolerant   |
| 212334_PM_at    | GNS                    | glucosamine (N-acetyl)-6-sulfatase                                                         | 0.0003 | -1.46 | Normal down vs > 5 Years Off IS Tolerant |
| 225073_PM_at    | PPHLN1                 | periphilin 1                                                                               | 0.0003 | 1.43  | Normal up vs > 5 Years Off IS Tolerant   |
| 222789_PM_at    | RSBN1                  | round spermatid basic protein 1                                                            | 0.0003 | 1.44  | Normal up vs > 5 Years Off IS Tolerant   |
| 1563487_PM_at   | ---                    | ---                                                                                        | 0.0003 | -1.46 | Normal down vs > 5 Years Off IS Tolerant |
| 237425_PM_at    | LOC474358              | hypothetical BC042079 locus                                                                | 0.0003 | -1.40 | Normal down vs > 5 Years Off IS Tolerant |
| 221677_PM_s_at  | DONSON                 | downstream neighbor of SON                                                                 | 0.0003 | 1.87  | Normal up vs > 5 Years Off IS Tolerant   |
| 1552791_PM_a_at | TRDN                   | triadin                                                                                    | 0.0003 | -1.74 | Normal down vs > 5 Years Off IS Tolerant |
| 230175_PM_s_at  | DCBLD2                 | Discoidin, CUB and LCCL domain containing 2                                                | 0.0003 | -2.07 | Normal down vs > 5 Years Off IS Tolerant |
| 208507_PM_at    | OR7C2                  | olfactory receptor, family 7, subfamily C, member 2                                        | 0.0003 | -1.35 | Normal down vs > 5 Years Off IS Tolerant |
| 218167_PM_at    | AMZ2                   | archaelysin family metallopeptidase 2                                                      | 0.0003 | 1.46  | Normal up vs > 5 Years Off IS Tolerant   |
| 209955_PM_s_at  | FAP                    | fibroblast activation protein, alpha                                                       | 0.0003 | -1.58 | Normal down vs > 5 Years Off IS Tolerant |
| 1568763_PM_s_at | LOC728613 ///<br>PDCD6 | programmed cell death 6 pseudogene /// programmed<br>cell death 6                          | 0.0003 | 1.85  | Normal up vs > 5 Years Off IS Tolerant   |
| 1559038_PM_at   | 2-Sep                  | septin 2                                                                                   | 0.0003 | 2.00  | Normal up vs > 5 Years Off IS Tolerant   |
| 202213_PM_s_at  | CUL4B                  | cullin 4B                                                                                  | 0.0003 | 2.32  | Normal up vs > 5 Years Off IS Tolerant   |
| 241306_PM_at    | ---                    | ---                                                                                        | 0.0003 | -1.54 | Normal down vs > 5 Years Off IS Tolerant |
| 239484_PM_at    | TRPM7                  | transient receptor potential cation channel, subfamily<br>M, member 7                      | 0.0003 | 1.89  | Normal up vs > 5 Years Off IS Tolerant   |
| 1563805_PM_a_at | FAM83C                 | family with sequence similarity 83, member C                                               | 0.0003 | -1.52 | Normal down vs > 5 Years Off IS Tolerant |
| 202413_PM_s_at  | USP1                   | ubiquitin specific peptidase 1                                                             | 0.0003 | 1.51  | Normal up vs > 5 Years Off IS Tolerant   |
| 226388_PM_at    | TCEA3                  | transcription elongation factor A (SII), 3                                                 | 0.0003 | 2.89  | Normal up vs > 5 Years Off IS Tolerant   |
| 221426_PM_s_at  | OR3A3                  | olfactory receptor, family 3, subfamily A, member 3                                        | 0.0003 | -1.44 | Normal down vs > 5 Years Off IS Tolerant |
| 204080_PM_at    | TOE1                   | target of EGR1, member 1 (nuclear)                                                         | 0.0003 | 1.74  | Normal up vs > 5 Years Off IS Tolerant   |
| 203367_PM_at    | DUSP14                 | dual specificity phosphatase 14                                                            | 0.0003 | 1.74  | Normal up vs > 5 Years Off IS Tolerant   |
| 1569905_PM_at   | HSD11B1L               | hydroxysteroid (11-beta) dehydrogenase 1-like                                              | 0.0003 | -1.36 | Normal down vs > 5 Years Off IS Tolerant |
| 244105_PM_at    | WHAMML1 ///<br>WHAMML2 | WAS protein homolog associated with actin, golgi<br>membranes and microtubules-like 1 (pse | 0.0003 | 1.63  | Normal up vs > 5 Years Off IS Tolerant   |

|                |                 |                                                                                   |        |       |                                          |
|----------------|-----------------|-----------------------------------------------------------------------------------|--------|-------|------------------------------------------|
| 241180_PM_at   | LOC100129112    | Hypothetical protein LOC100129112                                                 | 0.0003 | -1.32 | Normal down vs > 5 Years Off IS Tolerant |
| 203281_PM_s_at | UBA7            | ubiquitin-like modifier activating enzyme 7                                       | 0.0003 | 1.55  | Normal up vs > 5 Years Off IS Tolerant   |
| 213499_PM_at   | CLCN2           | chloride channel 2                                                                | 0.0003 | 1.36  | Normal up vs > 5 Years Off IS Tolerant   |
| 223501_PM_at   | TNFSF13B        | tumor necrosis factor (ligand) superfamily, member 13b                            | 0.0003 | -1.77 | Normal down vs > 5 Years Off IS Tolerant |
| 225808_PM_at   | C17orf95        | chromosome 17 open reading frame 95                                               | 0.0003 | 1.46  | Normal up vs > 5 Years Off IS Tolerant   |
| 1553319_PM_at  | OXGR1           | oxoglutarate (alpha-ketoglutarate) receptor 1                                     | 0.0003 | -1.27 | Normal down vs > 5 Years Off IS Tolerant |
| 231055_PM_at   | ---             | ---                                                                               | 0.0003 | 1.89  | Normal up vs > 5 Years Off IS Tolerant   |
| 205047_PM_s_at | ASNS            | asparagine synthetase (glutamine-hydrolyzing)                                     | 0.0003 | 2.06  | Normal up vs > 5 Years Off IS Tolerant   |
| 230386_PM_at   | ---             | ---                                                                               | 0.0003 | -1.53 | Normal down vs > 5 Years Off IS Tolerant |
| 208126_PM_s_at | CYP2C18         | cytochrome P450, family 2, subfamily C, polypeptide 18                            | 0.0003 | -1.62 | Normal down vs > 5 Years Off IS Tolerant |
| 215164_PM_at   | ---             | ---                                                                               | 0.0003 | -2.57 | Normal down vs > 5 Years Off IS Tolerant |
| 225033_PM_at   | ST3GAL1         | ST3 beta-galactoside alpha-2,3-sialyltransferase 1                                | 0.0003 | 1.83  | Normal up vs > 5 Years Off IS Tolerant   |
| 241924_PM_at   | ---             | ---                                                                               | 0.0003 | 2.18  | Normal up vs > 5 Years Off IS Tolerant   |
| 221940_PM_at   | RPUSD2          | RNA pseudouridylate synthase domain containing 2                                  | 0.0003 | 1.55  | Normal up vs > 5 Years Off IS Tolerant   |
| 218284_PM_at   | SMAD3           | SMAD family member 3                                                              | 0.0003 | 1.52  | Normal up vs > 5 Years Off IS Tolerant   |
| 215468_PM_at   | LOC647070       | hypothetical LOC647070                                                            | 0.0003 | -1.43 | Normal down vs > 5 Years Off IS Tolerant |
| 228031_PM_at   | TTPAL           | tocopherol (alpha) transfer protein-like                                          | 0.0003 | 1.44  | Normal up vs > 5 Years Off IS Tolerant   |
| 215135_PM_at   | DNPEP           | aspartyl aminopeptidase                                                           | 0.0003 | 1.72  | Normal up vs > 5 Years Off IS Tolerant   |
| 230387_PM_at   | ---             | ---                                                                               | 0.0003 | 1.76  | Normal up vs > 5 Years Off IS Tolerant   |
| 242984_PM_at   | MKLN1           | muskelin 1, intracellular mediator containing kelch motifs                        | 0.0003 | -2.33 | Normal down vs > 5 Years Off IS Tolerant |
| 201522_PM_x_at | SNRPN /// SNURF | small nuclear ribonucleoprotein polypeptide N ///<br>SNRPN upstream reading frame | 0.0003 | 1.69  | Normal up vs > 5 Years Off IS Tolerant   |
| 237006_PM_at   | ---             | ---                                                                               | 0.0003 | 2.07  | Normal up vs > 5 Years Off IS Tolerant   |
| 201037_PM_at   | PFKP            | phosphofructokinase, platelet                                                     | 0.0003 | 1.61  | Normal up vs > 5 Years Off IS Tolerant   |
| 219045_PM_at   | RHOF            | ras homolog gene family, member F (in filopodia)                                  | 0.0003 | 1.68  | Normal up vs > 5 Years Off IS Tolerant   |
| 222791_PM_at   | RSBN1           | round spermatid basic protein 1                                                   | 0.0003 | 1.90  | Normal up vs > 5 Years Off IS Tolerant   |
| 235721_PM_at   | DTX3            | deltex homolog 3 (Drosophila)                                                     | 0.0003 | 1.60  | Normal up vs > 5 Years Off IS Tolerant   |
| 239278_PM_at   | ---             | ---                                                                               | 0.0003 | 2.72  | Normal up vs > 5 Years Off IS Tolerant   |
| 228760_PM_at   | SRSF8           | serine/arginine-rich splicing factor 8                                            | 0.0003 | 1.74  | Normal up vs > 5 Years Off IS Tolerant   |
| 200629_PM_at   | WARS            | tryptophanyl-tRNA synthetase                                                      | 0.0003 | -1.66 | Normal down vs > 5 Years Off IS Tolerant |

|                 |              |                                                                                         |        |       |                                          |
|-----------------|--------------|-----------------------------------------------------------------------------------------|--------|-------|------------------------------------------|
| 224207_PM_x_at  | MMP28        | matrix metallopeptidase 28                                                              | 0.0003 | -1.75 | Normal down vs > 5 Years Off IS Tolerant |
| 244593_PM_at    | C17orf28     | chromosome 17 open reading frame 28                                                     | 0.0003 | -1.32 | Normal down vs > 5 Years Off IS Tolerant |
| 238632_PM_at    | LOC100505946 | hypothetical LOC100505946                                                               | 0.0003 | -1.46 | Normal down vs > 5 Years Off IS Tolerant |
| 207113_PM_s_at  | TNF          | tumor necrosis factor                                                                   | 0.0003 | 3.55  | Normal up vs > 5 Years Off IS Tolerant   |
| 209062_PM_x_at  | NCOA3        | nuclear receptor coactivator 3                                                          | 0.0003 | 2.54  | Normal up vs > 5 Years Off IS Tolerant   |
| 201662_PM_s_at  | ACSL3        | acyl-CoA synthetase long-chain family member 3                                          | 0.0003 | 2.05  | Normal up vs > 5 Years Off IS Tolerant   |
| 242772_PM_x_at  | ---          | ---                                                                                     | 0.0003 | 2.29  | Normal up vs > 5 Years Off IS Tolerant   |
| 227082_PM_at    | ---          | ---                                                                                     | 0.0003 | 1.87  | Normal up vs > 5 Years Off IS Tolerant   |
| 205067_PM_at    | IL1B         | interleukin 1, beta                                                                     | 0.0003 | 7.33  | Normal up vs > 5 Years Off IS Tolerant   |
| 200012_PM_x_at  | RPL21        | ribosomal protein L21                                                                   | 0.0003 | 1.15  | Normal up vs > 5 Years Off IS Tolerant   |
| 235493_PM_at    | ---          | ---                                                                                     | 0.0003 | 2.07  | Normal up vs > 5 Years Off IS Tolerant   |
| 206296_PM_x_at  | MAP4K1       | mitogen-activated protein kinase kinase kinase 1                                        | 0.0003 | 1.73  | Normal up vs > 5 Years Off IS Tolerant   |
| 1553530_PM_a_at | ITGB1        | integrin, beta 1 (fibronectin receptor, beta polypeptide, antigen CD29 includes MDF2, M | 0.0003 | 2.09  | Normal up vs > 5 Years Off IS Tolerant   |
| 226867_PM_at    | DENND4C      | DENN/MADD domain containing 4C                                                          | 0.0003 | 1.70  | Normal up vs > 5 Years Off IS Tolerant   |
| 229742_PM_at    | C15orf61     | chromosome 15 open reading frame 61                                                     | 0.0003 | 1.84  | Normal up vs > 5 Years Off IS Tolerant   |
| 209105_PM_at    | NCOA1        | nuclear receptor coactivator 1                                                          | 0.0003 | 1.71  | Normal up vs > 5 Years Off IS Tolerant   |
| 215440_PM_s_at  | BEX4         | brain expressed, X-linked 4                                                             | 0.0003 | 2.39  | Normal up vs > 5 Years Off IS Tolerant   |
| 210137_PM_s_at  | DCTD         | dCMP deaminase                                                                          | 0.0003 | 1.52  | Normal up vs > 5 Years Off IS Tolerant   |
| 232416_PM_at    | CELF5        | CUGBP, Elav-like family member 5                                                        | 0.0003 | -1.36 | Normal down vs > 5 Years Off IS Tolerant |
| 219716_PM_at    | APOL6        | apolipoprotein L, 6                                                                     | 0.0003 | -1.50 | Normal down vs > 5 Years Off IS Tolerant |
| 238716_PM_at    | FAM85A       | family with sequence similarity 85, member A                                            | 0.0003 | 1.84  | Normal up vs > 5 Years Off IS Tolerant   |
| 238884_PM_at    | ---          | ---                                                                                     | 0.0003 | -1.59 | Normal down vs > 5 Years Off IS Tolerant |
| 234158_PM_at    | ---          | ---                                                                                     | 0.0003 | -1.98 | Normal down vs > 5 Years Off IS Tolerant |
| 230526_PM_at    | LOC100131096 | hypothetical LOC100131096                                                               | 0.0003 | 2.10  | Normal up vs > 5 Years Off IS Tolerant   |
| 212846_PM_at    | RRP1B        | ribosomal RNA processing 1 homolog B (S. cerevisiae)                                    | 0.0003 | 1.95  | Normal up vs > 5 Years Off IS Tolerant   |
| 218517_PM_at    | PHF17        | PHD finger protein 17                                                                   | 0.0003 | 1.64  | Normal up vs > 5 Years Off IS Tolerant   |
| 232079_PM_s_at  | PVRL2        | poliovirus receptor-related 2 (herpesvirus entry mediator B)                            | 0.0003 | -1.47 | Normal down vs > 5 Years Off IS Tolerant |
| 212927_PM_at    | SMC5         | structural maintenance of chromosomes 5                                                 | 0.0003 | 1.45  | Normal up vs > 5 Years Off IS Tolerant   |

|                |              |                                                                            |        |       |                                          |
|----------------|--------------|----------------------------------------------------------------------------|--------|-------|------------------------------------------|
| 200670_PM_at   | XBP1         | X-box binding protein 1                                                    | 0.0003 | 1.37  | Normal up vs > 5 Years Off IS Tolerant   |
| 229313_PM_at   | ANO5         | anoctamin 5                                                                | 0.0003 | -1.49 | Normal down vs > 5 Years Off IS Tolerant |
| 201707_PM_at   | PEX19        | peroxisomal biogenesis factor 19                                           | 0.0003 | 1.78  | Normal up vs > 5 Years Off IS Tolerant   |
| 222885_PM_at   | EMCN         | endomucin                                                                  | 0.0003 | -1.56 | Normal down vs > 5 Years Off IS Tolerant |
| 215178_PM_x_at | NAAA         | N-acylethanolamine acid amidase                                            | 0.0003 | -1.50 | Normal down vs > 5 Years Off IS Tolerant |
| 201811_PM_x_at | SH3BP5       | SH3-domain binding protein 5 (BTK-associated)                              | 0.0003 | 1.38  | Normal up vs > 5 Years Off IS Tolerant   |
| 227729_PM_at   | ---          | ---                                                                        | 0.0003 | 1.73  | Normal up vs > 5 Years Off IS Tolerant   |
| 239062_PM_at   | LOC100131096 | hypothetical LOC100131096                                                  | 0.0003 | 1.98  | Normal up vs > 5 Years Off IS Tolerant   |
| 207032_PM_s_at | CRISP1       | cysteine-rich secretory protein 1                                          | 0.0003 | -1.50 | Normal down vs > 5 Years Off IS Tolerant |
| 203228_PM_at   | PAFAH1B3     | platelet-activating factor acetylhydrolase 1b, catalytic subunit 3 (29kDa) | 0.0003 | 1.75  | Normal up vs > 5 Years Off IS Tolerant   |
| 221313_PM_at   | GPR52        | G protein-coupled receptor 52                                              | 0.0003 | -1.60 | Normal down vs > 5 Years Off IS Tolerant |
| 218425_PM_at   | RNF216       | ring finger protein 216                                                    | 0.0003 | 2.20  | Normal up vs > 5 Years Off IS Tolerant   |
| 237048_PM_at   | ---          | ---                                                                        | 0.0003 | 1.48  | Normal up vs > 5 Years Off IS Tolerant   |
| 228611_PM_s_at | ---          | ---                                                                        | 0.0003 | 1.77  | Normal up vs > 5 Years Off IS Tolerant   |
| 1561500_PM_at  | CTU2         | Cytosolic thiouridylase subunit 2 homolog (S. pombe)                       | 0.0003 | -1.47 | Normal down vs > 5 Years Off IS Tolerant |
| 238935_PM_at   | RPS27L       | ribosomal protein S27-like                                                 | 0.0003 | 2.08  | Normal up vs > 5 Years Off IS Tolerant   |
| 239185_PM_at   | ABCA9        | ATP-binding cassette, sub-family A (ABC1), member 9                        | 0.0003 | -1.50 | Normal down vs > 5 Years Off IS Tolerant |
| 232716_PM_at   | ---          | ---                                                                        | 0.0003 | -2.20 | Normal down vs > 5 Years Off IS Tolerant |
| 1562596_PM_at  | ---          | ---                                                                        | 0.0003 | -1.38 | Normal down vs > 5 Years Off IS Tolerant |
| 233088_PM_at   | ---          | ---                                                                        | 0.0003 | 1.33  | Normal up vs > 5 Years Off IS Tolerant   |
| 213214_PM_x_at | ACTG1        | actin, gamma 1                                                             | 0.0003 | -1.16 | Normal down vs > 5 Years Off IS Tolerant |
| 234356_PM_at   | DKFZP434K028 | hypothetical LOC26070                                                      | 0.0003 | -1.42 | Normal down vs > 5 Years Off IS Tolerant |
| 218258_PM_at   | POLR1D       | polymerase (RNA) I polypeptide D, 16kDa                                    | 0.0003 | 1.67  | Normal up vs > 5 Years Off IS Tolerant   |
| 240276_PM_at   | ---          | ---                                                                        | 0.0003 | -1.71 | Normal down vs > 5 Years Off IS Tolerant |
| 200740_PM_s_at | SUMO3        | SMT3 suppressor of mif two 3 homolog 3 (S. cerevisiae)                     | 0.0003 | 1.47  | Normal up vs > 5 Years Off IS Tolerant   |



|                 |              |                                                              |        |       |                                          |
|-----------------|--------------|--------------------------------------------------------------|--------|-------|------------------------------------------|
| 227548_PM_at    | ORMDL1       | ORM1-like 1 ( <i>S. cerevisiae</i> )                         | 0.0003 | 2.35  | Normal up vs > 5 Years Off IS Tolerant   |
| 228272_PM_at    | DNLZ         | DNL-type zinc finger                                         | 0.0003 | 2.18  | Normal up vs > 5 Years Off IS Tolerant   |
| 241566_PM_at    | ---          | ---                                                          | 0.0003 | -1.55 | Normal down vs > 5 Years Off IS Tolerant |
| 207786_PM_at    | CYP2R1       | Cytochrome P450, family 2, subfamily R, polypeptide 1        | 0.0003 | 1.86  | Normal up vs > 5 Years Off IS Tolerant   |
| 212505_PM_s_at  | MAU2         | MAU2 chromatid cohesion factor homolog ( <i>C. elegans</i> ) | 0.0003 | 1.32  | Normal up vs > 5 Years Off IS Tolerant   |
| 1566693_PM_at   | ---          | ---                                                          | 0.0003 | -1.48 | Normal down vs > 5 Years Off IS Tolerant |
| 230449_PM_x_at  | ---          | ---                                                          | 0.0003 | 1.91  | Normal up vs > 5 Years Off IS Tolerant   |
| 208021_PM_s_at  | RFC1         | replication factor C (activator 1) 1, 145kDa                 | 0.0003 | 1.53  | Normal up vs > 5 Years Off IS Tolerant   |
| 212735_PM_at    | KIAA0226     | KIAA0226                                                     | 0.0003 | 1.46  | Normal up vs > 5 Years Off IS Tolerant   |
| 211203_PM_s_at  | CNTN1        | contactin 1                                                  | 0.0003 | -1.35 | Normal down vs > 5 Years Off IS Tolerant |
| 219233_PM_s_at  | GSDMB        | gasdermin B                                                  | 0.0003 | 2.29  | Normal up vs > 5 Years Off IS Tolerant   |
| 201529_PM_s_at  | RPA1         | replication protein A1, 70kDa                                | 0.0003 | 1.75  | Normal up vs > 5 Years Off IS Tolerant   |
| 1553046_PM_s_at | GAL3ST2      | galactose-3-O-sulfotransferase 2                             | 0.0003 | -1.28 | Normal down vs > 5 Years Off IS Tolerant |
| 78383_PM_at     | LOC100129250 | hypothetical LOC100129250                                    | 0.0003 | 1.68  | Normal up vs > 5 Years Off IS Tolerant   |
| 1564469_PM_at   | LMOD3        | leiomodoin 3 (fetal)                                         | 0.0003 | -1.33 | Normal down vs > 5 Years Off IS Tolerant |
| 202465_PM_at    | PCOLCE       | procollagen C-endopeptidase enhancer                         | 0.0003 | 1.37  | Normal up vs > 5 Years Off IS Tolerant   |
| 223006_PM_s_at  | C9orf5       | chromosome 9 open reading frame 5                            | 0.0003 | 1.62  | Normal up vs > 5 Years Off IS Tolerant   |
| 229145_PM_at    | ANAPC16      | anaphase promoting complex subunit 16                        | 0.0003 | 1.87  | Normal up vs > 5 Years Off IS Tolerant   |
| 213534_PM_s_at  | PASK         | PAS domain containing serine/threonine kinase                | 0.0003 | 3.58  | Normal up vs > 5 Years Off IS Tolerant   |
| 237462_PM_at    | ---          | ---                                                          | 0.0003 | -1.30 | Normal down vs > 5 Years Off IS Tolerant |
| 220510_PM_at    | RHBG         | Rh family, B glycoprotein (gene/pseudogene)                  | 0.0003 | -1.50 | Normal down vs > 5 Years Off IS Tolerant |
| 227676_PM_at    | FAM3D        | family with sequence similarity 3, member D                  | 0.0003 | -1.44 | Normal down vs > 5 Years Off IS Tolerant |
| 209439_PM_s_at  | PHKA2        | phosphorylase kinase, alpha 2 (liver)                        | 0.0003 | 1.44  | Normal up vs > 5 Years Off IS Tolerant   |
| 226413_PM_at    | LOC400027    | hypothetical LOC400027                                       | 0.0003 | 1.86  | Normal up vs > 5 Years Off IS Tolerant   |
| 203393_PM_at    | HES1         | hairy and enhancer of split 1, ( <i>Drosophila</i> )         | 0.0003 | -1.30 | Normal down vs > 5 Years Off IS Tolerant |
| 225957_PM_at    | C5orf41      | chromosome 5 open reading frame 41                           | 0.0003 | 1.56  | Normal up vs > 5 Years Off IS Tolerant   |
| 1561088_PM_at   | EYA4         | eyes absent homolog 4 ( <i>Drosophila</i> )                  | 0.0003 | -1.89 | Normal down vs > 5 Years Off IS Tolerant |

|                 |                            |                                                                          |        |       |                                          |
|-----------------|----------------------------|--------------------------------------------------------------------------|--------|-------|------------------------------------------|
| 228320_PM_x_at  | CCDC64                     | coiled-coil domain containing 64                                         | 0.0003 | 2.02  | Normal up vs > 5 Years Off IS Tolerant   |
| 235912_PM_at    | ---                        | ---                                                                      | 0.0003 | 2.27  | Normal up vs > 5 Years Off IS Tolerant   |
| 241935_PM_at    | SHROOM1                    | shroom family member 1                                                   | 0.0003 | -1.46 | Normal down vs > 5 Years Off IS Tolerant |
| 225845_PM_at    | ZBTB44                     | zinc finger and BTB domain containing 44                                 | 0.0003 | 1.62  | Normal up vs > 5 Years Off IS Tolerant   |
| 209494_PM_s_at  | PATZ1                      | POZ (BTB) and AT hook containing zinc finger 1                           | 0.0003 | 1.59  | Normal up vs > 5 Years Off IS Tolerant   |
| 225496_PM_s_at  | SYTL2                      | synaptotagmin-like 2                                                     | 0.0003 | 3.06  | Normal up vs > 5 Years Off IS Tolerant   |
| 219073_PM_s_at  | OSBPL10                    | oxysterol binding protein-like 10                                        | 0.0003 | 3.47  | Normal up vs > 5 Years Off IS Tolerant   |
| 244676_PM_s_at  | MTUS2                      | microtubule associated tumor suppressor candidate 2                      | 0.0003 | -1.32 | Normal down vs > 5 Years Off IS Tolerant |
| 217012_PM_at    | ---                        | ---                                                                      | 0.0003 | -1.47 | Normal down vs > 5 Years Off IS Tolerant |
| 220342_PM_x_at  | EDEM3                      | ER degradation enhancer, mannosidase alpha-like 3                        | 0.0003 | -1.78 | Normal down vs > 5 Years Off IS Tolerant |
| 218047_PM_at    | OSBPL9                     | oxysterol binding protein-like 9                                         | 0.0003 | 1.53  | Normal up vs > 5 Years Off IS Tolerant   |
| 229444_PM_at    | LOC100131607               | hypothetical LOC100131607                                                | 0.0003 | 1.75  | Normal up vs > 5 Years Off IS Tolerant   |
| 205089_PM_at    | ZNF7                       | zinc finger protein 7                                                    | 0.0003 | 1.90  | Normal up vs > 5 Years Off IS Tolerant   |
| 226650_PM_at    | ZFAND2A                    | zinc finger, AN1-type domain 2A                                          | 0.0003 | 1.80  | Normal up vs > 5 Years Off IS Tolerant   |
| 234662_PM_at    | RAD21L1                    | RAD21-like 1 (S. pombe)                                                  | 0.0003 | -1.51 | Normal down vs > 5 Years Off IS Tolerant |
| 220048_PM_at    | EDAR                       | ectodysplasin A receptor                                                 | 0.0003 | 2.41  | Normal up vs > 5 Years Off IS Tolerant   |
| 200593_PM_s_at  | HNRNPU                     | heterogeneous nuclear ribonucleoprotein U (scaffold attachment factor A) | 0.0003 | 1.19  | Normal up vs > 5 Years Off IS Tolerant   |
| 214003_PM_x_at  | RPS20                      | ribosomal protein S20                                                    | 0.0003 | 1.14  | Normal up vs > 5 Years Off IS Tolerant   |
| 229101_PM_at    | IL17RA ///<br>LOC100506204 | interleukin 17 receptor A /// hypothetical<br>LOC100506204               | 0.0003 | -1.65 | Normal down vs > 5 Years Off IS Tolerant |
| 205877_PM_s_at  | ZC3H7B                     | zinc finger CCCH-type containing 7B                                      | 0.0003 | -1.41 | Normal down vs > 5 Years Off IS Tolerant |
| 212197_PM_x_at  | MPRIP                      | myosin phosphatase Rho interacting protein                               | 0.0003 | 1.39  | Normal up vs > 5 Years Off IS Tolerant   |
| 202944_PM_at    | NAGA                       | N-acetylgalactosaminidase, alpha-                                        | 0.0003 | -1.71 | Normal down vs > 5 Years Off IS Tolerant |
| 1555702_PM_a_at | ST3GAL3                    | ST3 beta-galactoside alpha-2,3-sialyltransferase 3                       | 0.0003 | 1.53  | Normal up vs > 5 Years Off IS Tolerant   |
| 201678_PM_s_at  | C3orf37                    | chromosome 3 open reading frame 37                                       | 0.0003 | 1.63  | Normal up vs > 5 Years Off IS Tolerant   |
| 231726_PM_at    | PCDHB14                    | protocadherin beta 14                                                    | 0.0003 | -1.49 | Normal down vs > 5 Years Off IS Tolerant |
| 1566725_PM_at   | ---                        | ---                                                                      | 0.0003 | -1.36 | Normal down vs > 5 Years Off IS Tolerant |
| 212871_PM_at    | MAPKAPK5                   | mitogen-activated protein kinase-activated protein kinase 5              | 0.0003 | 1.76  | Normal up vs > 5 Years Off IS Tolerant   |

|                |              |                                                                               |        |       |                                          |
|----------------|--------------|-------------------------------------------------------------------------------|--------|-------|------------------------------------------|
| 201485_PM_s_at | RCN2         | reticulocalbin 2, EF-hand calcium binding domain                              | 0.0003 | 1.77  | Normal up vs > 5 Years Off IS Tolerant   |
| 240830_PM_at   | SCARNA17     | small Cajal body-specific RNA 17                                              | 0.0003 | 2.19  | Normal up vs > 5 Years Off IS Tolerant   |
| 221234_PM_s_at | BACH2        | BTB and CNC homology 1, basic leucine zipper transcription factor 2           | 0.0003 | 2.95  | Normal up vs > 5 Years Off IS Tolerant   |
| 1559117_PM_at  | ---          | ---                                                                           | 0.0003 | -2.28 | Normal down vs > 5 Years Off IS Tolerant |
| 209054_PM_s_at | WHSC1        | Wolf-Hirschhorn syndrome candidate 1                                          | 0.0003 | 1.57  | Normal up vs > 5 Years Off IS Tolerant   |
| 237410_PM_x_at | ---          | ---                                                                           | 0.0004 | -1.44 | Normal down vs > 5 Years Off IS Tolerant |
| 219358_PM_s_at | ADAP2        | ArfGAP with dual PH domains 2                                                 | 0.0004 | -1.74 | Normal down vs > 5 Years Off IS Tolerant |
| 218668_PM_s_at | RAP2C        | RAP2C, member of RAS oncogene family                                          | 0.0004 | 1.75  | Normal up vs > 5 Years Off IS Tolerant   |
| 214235_PM_at   | CYP3A5       | cytochrome P450, family 3, subfamily A, polypeptide 5                         | 0.0004 | -1.37 | Normal down vs > 5 Years Off IS Tolerant |
| 232459_PM_at   | ---          | ---                                                                           | 0.0004 | -1.60 | Normal down vs > 5 Years Off IS Tolerant |
| 210164_PM_at   | GZMB         | granzyme B (granzyme 2, cytotoxic T-lymphocyte-associated serine esterase 1)  | 0.0004 | 3.19  | Normal up vs > 5 Years Off IS Tolerant   |
| 213995_PM_at   | ATP5S        | ATP synthase, H+ transporting, mitochondrial Fo complex, subunit s (factor B) | 0.0004 | 2.15  | Normal up vs > 5 Years Off IS Tolerant   |
| 233803_PM_s_at | MYBBP1A      | MYB binding protein (P160) 1a                                                 | 0.0004 | 1.44  | Normal up vs > 5 Years Off IS Tolerant   |
| 227361_PM_at   | HS3ST3B1     | heparan sulfate (glucosamine) 3-O-sulfotransferase 3B1                        | 0.0004 | 2.94  | Normal up vs > 5 Years Off IS Tolerant   |
| 228330_PM_at   | ZUFSP        | zinc finger with UFM1-specific peptidase domain                               | 0.0004 | 1.98  | Normal up vs > 5 Years Off IS Tolerant   |
| 39402_PM_at    | IL1B         | interleukin 1, beta                                                           | 0.0004 | 7.05  | Normal up vs > 5 Years Off IS Tolerant   |
| 1561553_PM_at  | ---          | ---                                                                           | 0.0004 | -1.27 | Normal down vs > 5 Years Off IS Tolerant |
| 228370_PM_at   | LOC100506948 | hypothetical LOC100506948                                                     | 0.0004 | 2.00  | Normal up vs > 5 Years Off IS Tolerant   |
| 234170_PM_at   | ---          | ---                                                                           | 0.0004 | -1.49 | Normal down vs > 5 Years Off IS Tolerant |
| 238970_PM_at   | ---          | ---                                                                           | 0.0004 | 2.03  | Normal up vs > 5 Years Off IS Tolerant   |
| 226659_PM_at   | DEF6         | differentially expressed in FDCP 6 homolog (mouse)                            | 0.0004 | 1.42  | Normal up vs > 5 Years Off IS Tolerant   |
| 202313_PM_at   | PPP2R2A      | protein phosphatase 2, regulatory subunit B, alpha                            | 0.0004 | 1.33  | Normal up vs > 5 Years Off IS Tolerant   |
| 229701_PM_at   | DNAJC9       | DnaJ (Hsp40) homolog, subfamily C, member 9                                   | 0.0004 | -1.28 | Normal down vs > 5 Years Off IS Tolerant |
| 212789_PM_at   | NCAPD3       | non-SMC condensin II complex, subunit D3                                      | 0.0004 | 1.68  | Normal up vs > 5 Years Off IS Tolerant   |
| 218545_PM_at   | CCDC91       | coiled-coil domain containing 91                                              | 0.0004 | 1.53  | Normal up vs > 5 Years Off IS Tolerant   |
| 206171_PM_at   | ADORA3       | adenosine A3 receptor                                                         | 0.0004 | -1.41 | Normal down vs > 5 Years Off IS Tolerant |

|                 |                |                                                                                         |        |       |                                          |
|-----------------|----------------|-----------------------------------------------------------------------------------------|--------|-------|------------------------------------------|
| 227591_PM_at    | ---            | ---                                                                                     | 0.0004 | 1.75  | Normal up vs > 5 Years Off IS Tolerant   |
| 204442_PM_x_at  | LTBP4          | latent transforming growth factor beta binding protein 4                                | 0.0004 | 1.49  | Normal up vs > 5 Years Off IS Tolerant   |
| 1556274_PM_at   | ---            | ---                                                                                     | 0.0004 | -1.38 | Normal down vs > 5 Years Off IS Tolerant |
| 201550_PM_x_at  | ACTG1          | actin, gamma 1                                                                          | 0.0004 | -1.17 | Normal down vs > 5 Years Off IS Tolerant |
| 224885_PM_s_at  | KRTCAP2        | keratinocyte associated protein 2                                                       | 0.0004 | 1.43  | Normal up vs > 5 Years Off IS Tolerant   |
| 236310_PM_at    | ---            | ---                                                                                     | 0.0004 | -1.41 | Normal down vs > 5 Years Off IS Tolerant |
| 218928_PM_s_at  | SLC37A1        | solute carrier family 37 (glycerol-3-phosphate transporter), member 1                   | 0.0004 | 1.45  | Normal up vs > 5 Years Off IS Tolerant   |
| 228483_PM_s_at  | TAF9B          | TAF9B RNA polymerase II, TATA box binding protein (TBP)-associated factor, 31kDa        | 0.0004 | 2.27  | Normal up vs > 5 Years Off IS Tolerant   |
| 229419_PM_at    | FBXW7          | F-box and WD repeat domain containing 7                                                 | 0.0004 | 1.42  | Normal up vs > 5 Years Off IS Tolerant   |
| 213512_PM_at    | C14orf79       | chromosome 14 open reading frame 79                                                     | 0.0004 | -1.45 | Normal down vs > 5 Years Off IS Tolerant |
| 208072_PM_s_at  | DGKD           | diacylglycerol kinase, delta 130kDa                                                     | 0.0004 | 1.42  | Normal up vs > 5 Years Off IS Tolerant   |
| 201675_PM_at    | AKAP1          | A kinase (PRKA) anchor protein 1                                                        | 0.0004 | 1.53  | Normal up vs > 5 Years Off IS Tolerant   |
| 1558540_PM_s_at | SLC2A11        | solute carrier family 2 (facilitated glucose transporter), member 11                    | 0.0004 | 1.58  | Normal up vs > 5 Years Off IS Tolerant   |
| 1556739_PM_at   | GOLGA8IP       | golgin A8 family, member I (pseudogene)                                                 | 0.0004 | -1.46 | Normal down vs > 5 Years Off IS Tolerant |
| 211440_PM_x_at  | CYP3A43        | cytochrome P450, family 3, subfamily A, polypeptide 43                                  | 0.0004 | -1.49 | Normal down vs > 5 Years Off IS Tolerant |
| 233498_PM_at    | ERBB4          | v-erb-a erythroblastic leukemia viral oncogene homolog 4 (avian)                        | 0.0004 | -1.57 | Normal down vs > 5 Years Off IS Tolerant |
| 217313_PM_at    | ---            | ---                                                                                     | 0.0004 | 1.61  | Normal up vs > 5 Years Off IS Tolerant   |
| 240894_PM_at    | LOC100505649   | hypothetical LOC100505649                                                               | 0.0004 | -1.38 | Normal down vs > 5 Years Off IS Tolerant |
| 212590_PM_at    | RRAS2          | related RAS viral (r-ras) oncogene homolog 2                                            | 0.0004 | 2.40  | Normal up vs > 5 Years Off IS Tolerant   |
| 239715_PM_at    | ---            | ---                                                                                     | 0.0004 | -1.72 | Normal down vs > 5 Years Off IS Tolerant |
| 221007_PM_s_at  | FIP1L1         | FIP1 like 1 ( <i>S. cerevisiae</i> )                                                    | 0.0004 | 1.50  | Normal up vs > 5 Years Off IS Tolerant   |
| 203750_PM_s_at  | RARA           | retinoic acid receptor, alpha                                                           | 0.0004 | -1.57 | Normal down vs > 5 Years Off IS Tolerant |
| 215151_PM_at    | DOCK10         | dedicator of cytokinesis 10                                                             | 0.0004 | 2.05  | Normal up vs > 5 Years Off IS Tolerant   |
| 228518_PM_at    | IGHG1 /// IGHM | immunoglobulin heavy constant gamma 1 (G1m marker) /// immunoglobulin heavy constant mu | 0.0004 | 2.75  | Normal up vs > 5 Years Off IS Tolerant   |

|                 |               |                                                                              |        |       |                                          |
|-----------------|---------------|------------------------------------------------------------------------------|--------|-------|------------------------------------------|
| 1569604_PM_at   | LOC100133612  | similar to hCG1815312                                                        | 0.0004 | -1.49 | Normal down vs > 5 Years Off IS Tolerant |
| 1554919_PM_s_at | C7orf63       | chromosome 7 open reading frame 63                                           | 0.0004 | -2.04 | Normal down vs > 5 Years Off IS Tolerant |
| 209957_PM_s_at  | NPPA          | natriuretic peptide A                                                        | 0.0004 | -1.54 | Normal down vs > 5 Years Off IS Tolerant |
| 210031_PM_at    | CD247         | CD247 molecule                                                               | 0.0004 | 2.42  | Normal up vs > 5 Years Off IS Tolerant   |
| 1557733_PM_a_at | ---           | ---                                                                          | 0.0004 | 3.89  | Normal up vs > 5 Years Off IS Tolerant   |
| 225933_PM_at    | CCDC137       | coiled-coil domain containing 137                                            | 0.0004 | 1.67  | Normal up vs > 5 Years Off IS Tolerant   |
| 1564790_PM_at   | ST7OT2        | ST7 overlapping transcript 2 (non-protein coding)                            | 0.0004 | -1.36 | Normal down vs > 5 Years Off IS Tolerant |
| 1563054_PM_at   | ---           | ---                                                                          | 0.0004 | -1.47 | Normal down vs > 5 Years Off IS Tolerant |
| 208834_PM_x_at  | RPL23A        | ribosomal protein L23a                                                       | 0.0004 | 1.14  | Normal up vs > 5 Years Off IS Tolerant   |
| 235126_PM_at    | NCRNA00292    | non-protein coding RNA 292                                                   | 0.0004 | -2.59 | Normal down vs > 5 Years Off IS Tolerant |
| 227264_PM_at    | ---           | ---                                                                          | 0.0004 | 1.65  | Normal up vs > 5 Years Off IS Tolerant   |
| 222463_PM_s_at  | BACE1         | beta-site APP-cleaving enzyme 1                                              | 0.0004 | -1.42 | Normal down vs > 5 Years Off IS Tolerant |
| 1554495_PM_s_at | MTHFSD        | methenyltetrahydrofolate synthetase domain containing                        | 0.0004 | -1.38 | Normal down vs > 5 Years Off IS Tolerant |
| 237205_PM_at    | NCRNA00238    | non-protein coding RNA 238                                                   | 0.0004 | -1.43 | Normal down vs > 5 Years Off IS Tolerant |
| 212453_PM_at    | KIAA1279      | KIAA1279                                                                     | 0.0004 | 2.07  | Normal up vs > 5 Years Off IS Tolerant   |
| 223563_PM_at    | GNB1L         | guanine nucleotide binding protein (G protein), beta polypeptide 1-like      | 0.0004 | -1.30 | Normal down vs > 5 Years Off IS Tolerant |
| 203664_PM_s_at  | POLR2D        | polymerase (RNA) II (DNA directed) polypeptide D                             | 0.0004 | 2.03  | Normal up vs > 5 Years Off IS Tolerant   |
| 205754_PM_at    | F2            | coagulation factor II (thrombin)                                             | 0.0004 | -1.39 | Normal down vs > 5 Years Off IS Tolerant |
| 233744_PM_at    | ---           | ---                                                                          | 0.0004 | -1.54 | Normal down vs > 5 Years Off IS Tolerant |
| 214567_PM_s_at  | XCL1 /// XCL2 | chemokine (C motif) ligand 1 /// chemokine (C motif) ligand 2                | 0.0004 | 3.13  | Normal up vs > 5 Years Off IS Tolerant   |
| 205967_PM_at    | HIST1H4C      | histone cluster 1, H4c                                                       | 0.0004 | 1.60  | Normal up vs > 5 Years Off IS Tolerant   |
| 1554947_PM_at   | ACAT1         | acetyl-CoA acetyltransferase 1                                               | 0.0004 | -1.44 | Normal down vs > 5 Years Off IS Tolerant |
| 212406_PM_s_at  | PCMTD2        | protein-L-isoaspartate (D-aspartate) O-methyltransferase domain containing 2 | 0.0004 | 1.57  | Normal up vs > 5 Years Off IS Tolerant   |
| 203622_PM_s_at  | PNO1          | partner of NOB1 homolog ( <i>S. cerevisiae</i> )                             | 0.0004 | 1.89  | Normal up vs > 5 Years Off IS Tolerant   |

|                |               |                                                                                        |        |       |                                          |
|----------------|---------------|----------------------------------------------------------------------------------------|--------|-------|------------------------------------------|
| 1554126_PM_at  | MSRB3         | methionine sulfoxide reductase B3                                                      | 0.0004 | -2.11 | Normal down vs > 5 Years Off IS Tolerant |
| 1560089_PM_at  | LOC100289019  | hypothetical LOC100289019                                                              | 0.0004 | 1.72  | Normal up vs > 5 Years Off IS Tolerant   |
| 207424_PM_at   | MYF5          | myogenic factor 5                                                                      | 0.0004 | -1.38 | Normal down vs > 5 Years Off IS Tolerant |
| 235864_PM_at   | MPP5          | Membrane protein, palmitoylated 5 (MAGUK p55 subfamily member 5)                       | 0.0004 | -1.60 | Normal down vs > 5 Years Off IS Tolerant |
| 225547_PM_at   | SNHG6         | small nucleolar RNA host gene 6 (non-protein coding)                                   | 0.0004 | 1.34  | Normal up vs > 5 Years Off IS Tolerant   |
| 204976_PM_s_at | AMMECR1       | Alport syndrome, mental retardation, midface hypoplasia and elliptocytosis chromosomal | 0.0004 | 1.99  | Normal up vs > 5 Years Off IS Tolerant   |
| 236611_PM_at   | LOC100506676  | hypothetical LOC100506676                                                              | 0.0004 | 1.61  | Normal up vs > 5 Years Off IS Tolerant   |
| 223067_PM_at   | CWC15         | CWC15 spliceosome-associated protein homolog (S. cerevisiae)                           | 0.0004 | 1.34  | Normal up vs > 5 Years Off IS Tolerant   |
| 1555212_PM_at  | OR8B8         | olfactory receptor, family 8, subfamily B, member 8                                    | 0.0004 | -1.47 | Normal down vs > 5 Years Off IS Tolerant |
| 241902_PM_at   | MKX           | mohawk homeobox                                                                        | 0.0004 | -1.43 | Normal down vs > 5 Years Off IS Tolerant |
| 211005_PM_at   | LAT /// SPNS1 | linker for activation of T cells /// spinster homolog 1 (Drosophila)                   | 0.0004 | 2.54  | Normal up vs > 5 Years Off IS Tolerant   |
| 216348_PM_at   | RPS17         | ribosomal protein S17                                                                  | 0.0004 | 1.60  | Normal up vs > 5 Years Off IS Tolerant   |
| 228283_PM_at   | CMC1          | COX assembly mitochondrial protein homolog (S. cerevisiae)                             | 0.0004 | 2.38  | Normal up vs > 5 Years Off IS Tolerant   |
| 223259_PM_at   | ORMDL3        | ORM1-like 3 (S. cerevisiae)                                                            | 0.0004 | 2.15  | Normal up vs > 5 Years Off IS Tolerant   |
| 35147_PM_at    | MCF2L         | MCF.2 cell line derived transforming sequence-like                                     | 0.0004 | 1.60  | Normal up vs > 5 Years Off IS Tolerant   |
| 1558852_PM_at  | ---           | ---                                                                                    | 0.0004 | -1.38 | Normal down vs > 5 Years Off IS Tolerant |
| 239799_PM_at   | C9orf130      | chromosome 9 open reading frame 130                                                    | 0.0004 | 1.83  | Normal up vs > 5 Years Off IS Tolerant   |
| 226508_PM_at   | PHC3          | polyhomeotic homolog 3 (Drosophila)                                                    | 0.0004 | 1.49  | Normal up vs > 5 Years Off IS Tolerant   |
| 222749_PM_at   | SUFU          | suppressor of fused homolog (Drosophila)                                               | 0.0004 | -1.48 | Normal down vs > 5 Years Off IS Tolerant |
| 214643_PM_x_at | BIN1          | bridging integrator 1                                                                  | 0.0004 | 1.74  | Normal up vs > 5 Years Off IS Tolerant   |
| 239337_PM_at   | LOC400768     | hypothetical LOC400768                                                                 | 0.0004 | -1.33 | Normal down vs > 5 Years Off IS Tolerant |
| 239403_PM_at   | CCDC120       | coiled-coil domain containing 120                                                      | 0.0004 | 1.37  | Normal up vs > 5 Years Off IS Tolerant   |
| 202408_PM_s_at | PRPF31        | PRP31 pre-mRNA processing factor 31 homolog (S. cerevisiae)                            | 0.0004 | 1.27  | Normal up vs > 5 Years Off IS Tolerant   |
| 219084_PM_at   | NSD1          | nuclear receptor binding SET domain protein 1                                          | 0.0004 | 1.53  | Normal up vs > 5 Years Off IS Tolerant   |
| 200754_PM_x_at | SRSF2         | serine/arginine-rich splicing factor 2                                                 | 0.0004 | 1.24  | Normal up vs > 5 Years Off IS Tolerant   |
| 225329_PM_at   | FAM195B       | family with sequence similarity 195, member B                                          | 0.0004 | 1.36  | Normal up vs > 5 Years Off IS Tolerant   |

|                |                                                                         |                                                                                         |        |       |                                          |
|----------------|-------------------------------------------------------------------------|-----------------------------------------------------------------------------------------|--------|-------|------------------------------------------|
| 221488_PM_s_at | CUTA                                                                    | cutA divalent cation tolerance homolog (E. coli)                                        | 0.0004 | 1.50  | Normal up vs > 5 Years Off IS Tolerant   |
| 203789_PM_s_at | SEMA3C                                                                  | sema domain, immunoglobulin domain (Ig), short basic domain, secreted, (semaphorin) 3C  | 0.0004 | -2.30 | Normal down vs > 5 Years Off IS Tolerant |
| 209440_PM_at   | PRPS1                                                                   | phosphoribosyl pyrophosphate synthetase 1                                               | 0.0004 | 1.60  | Normal up vs > 5 Years Off IS Tolerant   |
| 1560533_PM_at  | ---                                                                     | ---                                                                                     | 0.0004 | -1.61 | Normal down vs > 5 Years Off IS Tolerant |
| 221984_PM_s_at | FAM134A                                                                 | family with sequence similarity 134, member A                                           | 0.0004 | 1.59  | Normal up vs > 5 Years Off IS Tolerant   |
| 220839_PM_at   | METTL5                                                                  | methyltransferase like 5                                                                | 0.0004 | 1.69  | Normal up vs > 5 Years Off IS Tolerant   |
| 214219_PM_x_at | MAP4K1                                                                  | mitogen-activated protein kinase kinase kinase kinase 1                                 | 0.0004 | 1.70  | Normal up vs > 5 Years Off IS Tolerant   |
| 203684_PM_s_at | BCL2                                                                    | B-cell CLL/lymphoma 2                                                                   | 0.0004 | 1.76  | Normal up vs > 5 Years Off IS Tolerant   |
| 233913_PM_at   | WFDC10A                                                                 | WAP four-disulfide core domain 10A                                                      | 0.0004 | -1.28 | Normal down vs > 5 Years Off IS Tolerant |
| 227954_PM_at   | ITPR1PL2                                                                | inositol 1,4,5-triphosphate receptor interacting protein-like 2                         | 0.0004 | -1.95 | Normal down vs > 5 Years Off IS Tolerant |
| 227728_PM_at   | PPM1A                                                                   | protein phosphatase, Mg <sup>2+</sup> /Mn <sup>2+</sup> dependent, 1A                   | 0.0004 | 1.55  | Normal up vs > 5 Years Off IS Tolerant   |
| 232704_PM_s_at | LRRFIP2                                                                 | leucine rich repeat (in FLII) interacting protein 2                                     | 0.0004 | -1.47 | Normal down vs > 5 Years Off IS Tolerant |
| 209266_PM_s_at | SLC39A8                                                                 | solute carrier family 39 (zinc transporter), member 8                                   | 0.0004 | -1.50 | Normal down vs > 5 Years Off IS Tolerant |
| 208825_PM_x_at | RPL23A                                                                  | ribosomal protein L23a                                                                  | 0.0004 | 1.13  | Normal up vs > 5 Years Off IS Tolerant   |
| 235170_PM_at   | ZNF92                                                                   | zinc finger protein 92                                                                  | 0.0004 | 1.93  | Normal up vs > 5 Years Off IS Tolerant   |
| 244771_PM_at   | KBTBD12                                                                 | kelch repeat and BTB (POZ) domain containing 12                                         | 0.0004 | -1.65 | Normal down vs > 5 Years Off IS Tolerant |
| 203518_PM_at   | LYST                                                                    | lysosomal trafficking regulator                                                         | 0.0004 | -1.59 | Normal down vs > 5 Years Off IS Tolerant |
| 216842_PM_x_at | RBM1A1 ///<br>RBM1B ///<br>RBM1D ///<br>RBM1E ///<br>RBM1F ///<br>RBM1J | RNA binding motif protein, Y-linked, family 1, member A1 /// RNA binding motif protein, | 0.0004 | -1.63 | Normal down vs > 5 Years Off IS Tolerant |
| 200026_PM_at   | RPL34                                                                   | ribosomal protein L34                                                                   | 0.0004 | 1.17  | Normal up vs > 5 Years Off IS Tolerant   |
| 1565610_PM_at  | ---                                                                     | ---                                                                                     | 0.0004 | -1.34 | Normal down vs > 5 Years Off IS Tolerant |
| 227007_PM_at   | TMCO4                                                                   | transmembrane and coiled-coil domains 4                                                 | 0.0004 | 1.73  | Normal up vs > 5 Years Off IS Tolerant   |
| 212522_PM_at   | PDE8A                                                                   | phosphodiesterase 8A                                                                    | 0.0004 | 1.92  | Normal up vs > 5 Years Off IS Tolerant   |
| 212140_PM_at   | PDS5A                                                                   | PDS5, regulator of cohesion maintenance, homolog A (S. cerevisiae)                      | 0.0004 | 1.33  | Normal up vs > 5 Years Off IS Tolerant   |

|                 |              |                                                                                          |        |       |                                          |
|-----------------|--------------|------------------------------------------------------------------------------------------|--------|-------|------------------------------------------|
| 1562074_PM_a_at | UNC13C       | unc-13 homolog C (C. elegans)                                                            | 0.0004 | -1.43 | Normal down vs > 5 Years Off IS Tolerant |
| 238807_PM_at    | GAPDHP62     | glyceraldehyde 3 phosphate dehydrogenase pseudogene 62                                   | 0.0004 | 1.98  | Normal up vs > 5 Years Off IS Tolerant   |
| 229268_PM_at    | FAM105B      | family with sequence similarity 105, member B                                            | 0.0004 | 1.79  | Normal up vs > 5 Years Off IS Tolerant   |
| 232527_PM_at    | ---          | ---                                                                                      | 0.0004 | 1.73  | Normal up vs > 5 Years Off IS Tolerant   |
| 223785_PM_at    | FANCI        | Fanconi anemia, complementation group I                                                  | 0.0004 | -1.48 | Normal down vs > 5 Years Off IS Tolerant |
| 209305_PM_s_at  | GADD45B      | growth arrest and DNA-damage-inducible, beta                                             | 0.0004 | 2.74  | Normal up vs > 5 Years Off IS Tolerant   |
| 216457_PM_s_at  | SF3A1        | splicing factor 3a, subunit 1, 120kDa                                                    | 0.0004 | 1.41  | Normal up vs > 5 Years Off IS Tolerant   |
| 203171_PM_s_at  | RRP8         | ribosomal RNA processing 8, methyltransferase, homolog (yeast)                           | 0.0004 | 1.58  | Normal up vs > 5 Years Off IS Tolerant   |
| 223956_PM_at    | TMPRSS13     | transmembrane protease, serine 13                                                        | 0.0004 | -1.51 | Normal down vs > 5 Years Off IS Tolerant |
| 1556988_PM_s_at | CHD1L        | chromodomain helicase DNA binding protein 1-like                                         | 0.0004 | 1.46  | Normal up vs > 5 Years Off IS Tolerant   |
| 208029_PM_s_at  | LAPTM4B      | lysosomal protein transmembrane 4 beta                                                   | 0.0004 | 1.70  | Normal up vs > 5 Years Off IS Tolerant   |
| 234769_PM_at    | DKFZp547J222 | hypothetical LOC84237                                                                    | 0.0004 | -1.37 | Normal down vs > 5 Years Off IS Tolerant |
| 209563_PM_x_at  | CALM1        | calmodulin 1 (phosphorylase kinase, delta)                                               | 0.0004 | 1.28  | Normal up vs > 5 Years Off IS Tolerant   |
| 212573_PM_at    | ENDOD1       | endonuclease domain containing 1                                                         | 0.0004 | 1.89  | Normal up vs > 5 Years Off IS Tolerant   |
| 244881_PM_at    | LMLN         | leishmanolysin-like (metallopeptidase M8 family)                                         | 0.0004 | 1.75  | Normal up vs > 5 Years Off IS Tolerant   |
| 202897_PM_at    | SIRPA        | signal-regulatory protein alpha                                                          | 0.0004 | -1.82 | Normal down vs > 5 Years Off IS Tolerant |
| 1555065_PM_x_at | USP6         | ubiquitin specific peptidase 6 (Tre-2 oncogene)                                          | 0.0004 | -1.71 | Normal down vs > 5 Years Off IS Tolerant |
| 213672_PM_at    | MARS         | methionyl-tRNA synthetase                                                                | 0.0004 | 1.72  | Normal up vs > 5 Years Off IS Tolerant   |
| 221847_PM_at    | LOC100129361 | hypothetical LOC100129361                                                                | 0.0004 | 1.60  | Normal up vs > 5 Years Off IS Tolerant   |
| 210241_PM_s_at  | TP53TG1      | TP53 target 1 (non-protein coding)                                                       | 0.0004 | 1.70  | Normal up vs > 5 Years Off IS Tolerant   |
| 213947_PM_s_at  | NUP210       | nucleoporin 210kDa                                                                       | 0.0004 | 1.41  | Normal up vs > 5 Years Off IS Tolerant   |
| 226039_PM_at    | MGAT4A       | mannosyl (alpha-1,3-)-glycoprotein beta-1,4-N-acetylglucosaminyltransferase, isozyme A   | 0.0004 | 2.39  | Normal up vs > 5 Years Off IS Tolerant   |
| 46665_PM_at     | SEMA4C       | sema domain, immunoglobulin domain (Ig), transmembrane domain (TM) and short cytoplasmic | 0.0004 | 1.89  | Normal up vs > 5 Years Off IS Tolerant   |
| 207050_PM_at    | CACNA2D1     | calcium channel, voltage-dependent, alpha 2/delta subunit 1                              | 0.0004 | -1.66 | Normal down vs > 5 Years Off IS Tolerant |
| 221049_PM_s_at  | POLL         | polymerase (DNA directed), lambda                                                        | 0.0004 | -1.44 | Normal down vs > 5 Years Off IS Tolerant |
| 212254_PM_s_at  | DST          | dystonin                                                                                 | 0.0004 | -1.70 | Normal down vs > 5 Years Off IS Tolerant |



|                 |           |                                                                        |        |       |                                          |
|-----------------|-----------|------------------------------------------------------------------------|--------|-------|------------------------------------------|
| 231948_PM_s_at  | UBE2F     | ubiquitin-conjugating enzyme E2F (putative)                            | 0.0004 | 1.55  | Normal up vs > 5 Years Off IS Tolerant   |
| 208241_PM_at    | NRG1      | neuregulin 1                                                           | 0.0004 | -2.27 | Normal down vs > 5 Years Off IS Tolerant |
| 236863_PM_at    | C17orf67  | chromosome 17 open reading frame 67                                    | 0.0004 | 1.61  | Normal up vs > 5 Years Off IS Tolerant   |
| 225653_PM_at    | TGFBRAP1  | transforming growth factor, beta receptor associated protein 1         | 0.0004 | 1.37  | Normal up vs > 5 Years Off IS Tolerant   |
| 214857_PM_at    | ---       | ---                                                                    | 0.0004 | 2.02  | Normal up vs > 5 Years Off IS Tolerant   |
| 1569188_PM_s_at | ---       | ---                                                                    | 0.0004 | -1.37 | Normal down vs > 5 Years Off IS Tolerant |
| 220872_PM_at    | PRO2964   | hypothetical protein PRO2964                                           | 0.0004 | -1.33 | Normal down vs > 5 Years Off IS Tolerant |
| 1554489_PM_a_at | CEP70     | centrosomal protein 70kDa                                              | 0.0004 | 1.50  | Normal up vs > 5 Years Off IS Tolerant   |
| 210734_PM_x_at  | MAX       | MYC associated factor X                                                | 0.0004 | 1.86  | Normal up vs > 5 Years Off IS Tolerant   |
| 219628_PM_at    | ZMAT3     | zinc finger, matrin-type 3                                             | 0.0004 | 1.82  | Normal up vs > 5 Years Off IS Tolerant   |
| 1598_PM_g_at    | GAS6      | growth arrest-specific 6                                               | 0.0004 | -1.56 | Normal down vs > 5 Years Off IS Tolerant |
| 231873_PM_at    | BMPR2     | bone morphogenetic protein receptor, type II (serine/threonine kinase) | 0.0004 | 2.48  | Normal up vs > 5 Years Off IS Tolerant   |
| 236740_PM_at    | ---       | ---                                                                    | 0.0004 | -2.01 | Normal down vs > 5 Years Off IS Tolerant |
| 230140_PM_at    | PTPN9     | Protein tyrosine phosphatase, non-receptor type 9                      | 0.0004 | -1.52 | Normal down vs > 5 Years Off IS Tolerant |
| 205590_PM_at    | RASGRP1   | RAS guanyl releasing protein 1 (calcium and DAG-regulated)             | 0.0004 | 1.96  | Normal up vs > 5 Years Off IS Tolerant   |
| 227420_PM_at    | TNFAIP8L1 | tumor necrosis factor, alpha-induced protein 8-like 1                  | 0.0004 | 1.84  | Normal up vs > 5 Years Off IS Tolerant   |
| 201561_PM_s_at  | CLSTN1    | calsyntenin 1                                                          | 0.0004 | 1.41  | Normal up vs > 5 Years Off IS Tolerant   |
| 201022_PM_s_at  | DSTN      | destrin (actin depolymerizing factor)                                  | 0.0004 | 1.46  | Normal up vs > 5 Years Off IS Tolerant   |
| 208447_PM_s_at  | PRPS1     | phosphoribosyl pyrophosphate synthetase 1                              | 0.0004 | 2.29  | Normal up vs > 5 Years Off IS Tolerant   |
| 1560942_PM_at   | ---       | ---                                                                    | 0.0004 | -1.31 | Normal down vs > 5 Years Off IS Tolerant |
| 240572_PM_s_at  | LOC374443 | CLR pseudogene                                                         | 0.0004 | 1.90  | Normal up vs > 5 Years Off IS Tolerant   |
| 201997_PM_s_at  | SPEN      | spen homolog, transcriptional regulator (Drosophila)                   | 0.0004 | 1.25  | Normal up vs > 5 Years Off IS Tolerant   |
| 225152_PM_at    | ZNF622    | zinc finger protein 622                                                | 0.0004 | 1.47  | Normal up vs > 5 Years Off IS Tolerant   |
| 232583_PM_at    | ---       | ---                                                                    | 0.0004 | 2.19  | Normal up vs > 5 Years Off IS Tolerant   |
| 233856_PM_at    | ---       | ---                                                                    | 0.0004 | -1.57 | Normal down vs > 5 Years Off IS Tolerant |
| 1552364_PM_s_at | MSI2      | musashi homolog 2 (Drosophila)                                         | 0.0004 | 1.57  | Normal up vs > 5 Years Off IS Tolerant   |
| 229120_PM_s_at  | CDC42SE1  | CDC42 small effector 1                                                 | 0.0004 | 1.34  | Normal up vs > 5 Years Off IS Tolerant   |

|                 |                      |                                                                                         |        |       |                                          |
|-----------------|----------------------|-----------------------------------------------------------------------------------------|--------|-------|------------------------------------------|
| 232386_PM_at    | VPS13C               | vacuolar protein sorting 13 homolog C ( <i>S. cerevisiae</i> )                          | 0.0005 | -1.84 | Normal down vs > 5 Years Off IS Tolerant |
| 216232_PM_s_at  | GCN1L1               | GCN1 general control of amino-acid synthesis 1-like 1 (yeast)                           | 0.0005 | 1.49  | Normal up vs > 5 Years Off IS Tolerant   |
| 203865_PM_s_at  | ADARB1               | adenosine deaminase, RNA-specific, B1                                                   | 0.0005 | 2.11  | Normal up vs > 5 Years Off IS Tolerant   |
| 214431_PM_at    | GMPS                 | guanine monphosphate synthetase                                                         | 0.0005 | 1.40  | Normal up vs > 5 Years Off IS Tolerant   |
| 240356_PM_s_at  | ---                  | ---                                                                                     | 0.0005 | -1.38 | Normal down vs > 5 Years Off IS Tolerant |
| 238950_PM_at    | ---                  | ---                                                                                     | 0.0005 | -1.44 | Normal down vs > 5 Years Off IS Tolerant |
| 226947_PM_at    | GUSBP1 ///<br>GUSBP4 | glucuronidase, beta pseudogene 1 /// glucuronidase, beta pseudogene 4                   | 0.0005 | 1.92  | Normal up vs > 5 Years Off IS Tolerant   |
| 214384_PM_s_at  | DCTN2                | Dynactin 2 (p50)                                                                        | 0.0005 | -1.42 | Normal down vs > 5 Years Off IS Tolerant |
| 1556188_PM_a_at | ZNF555               | zinc finger protein 555                                                                 | 0.0005 | -1.59 | Normal down vs > 5 Years Off IS Tolerant |
| 239015_PM_at    | FLJ39582             | hypothetical LOC439931                                                                  | 0.0005 | 1.54  | Normal up vs > 5 Years Off IS Tolerant   |
| 210691_PM_s_at  | CACYBP               | calcyclin binding protein                                                               | 0.0005 | 2.13  | Normal up vs > 5 Years Off IS Tolerant   |
| 200753_PM_x_at  | SRSF2                | serine/arginine-rich splicing factor 2                                                  | 0.0005 | 1.48  | Normal up vs > 5 Years Off IS Tolerant   |
| 204252_PM_at    | CDK2                 | cyclin-dependent kinase 2                                                               | 0.0005 | 1.55  | Normal up vs > 5 Years Off IS Tolerant   |
| 228446_PM_at    | KIAA2026             | KIAA2026                                                                                | 0.0005 | 1.48  | Normal up vs > 5 Years Off IS Tolerant   |
| 224770_PM_s_at  | NAV1                 | neuron navigator 1                                                                      | 0.0005 | -1.54 | Normal down vs > 5 Years Off IS Tolerant |
| 1570219_PM_at   | LOXL4                | lysyl oxidase-like 4                                                                    | 0.0005 | -1.42 | Normal down vs > 5 Years Off IS Tolerant |
| 222270_PM_at    | SMEK2                | SMEK homolog 2, suppressor of mek1 ( <i>Dictyostelium</i> )                             | 0.0005 | 2.21  | Normal up vs > 5 Years Off IS Tolerant   |
| 228002_PM_at    | GTPBP4 /// IDI2      | GTP binding protein 4 /// isopentenyl-diphosphate delta isomerase 2                     | 0.0005 | 1.63  | Normal up vs > 5 Years Off IS Tolerant   |
| 218305_PM_at    | IPO4                 | importin 4                                                                              | 0.0005 | 1.68  | Normal up vs > 5 Years Off IS Tolerant   |
| 209625_PM_at    | PIGH                 | phosphatidylinositol glycan anchor biosynthesis, class H                                | 0.0005 | 1.86  | Normal up vs > 5 Years Off IS Tolerant   |
| 211743_PM_s_at  | PRG2                 | proteoglycan 2, bone marrow (natural killer cell activator, eosinophil granule major ba | 0.0005 | -1.36 | Normal down vs > 5 Years Off IS Tolerant |
| 232970_PM_at    | ---                  | ---                                                                                     | 0.0005 | -1.55 | Normal down vs > 5 Years Off IS Tolerant |
| 239541_PM_at    | ---                  | ---                                                                                     | 0.0005 | -1.32 | Normal down vs > 5 Years Off IS Tolerant |
| 225461_PM_at    | EHMT1                | euchromatic histone-lysine N-methyltransferase 1                                        | 0.0005 | 1.66  | Normal up vs > 5 Years Off IS Tolerant   |

|                 |          |                                                                         |        |       |                                          |
|-----------------|----------|-------------------------------------------------------------------------|--------|-------|------------------------------------------|
| 241831_PM_at    | ---      | ---                                                                     | 0.0005 | -1.39 | Normal down vs > 5 Years Off IS Tolerant |
| 224292_PM_at    | TTY13    | testis-specific transcript, Y-linked 13 (non-protein coding)            | 0.0005 | -1.59 | Normal down vs > 5 Years Off IS Tolerant |
| 243969_PM_at    | SLC24A4  | solute carrier family 24 (sodium/potassium/calcium exchanger), member 4 | 0.0005 | -2.15 | Normal down vs > 5 Years Off IS Tolerant |
| 230852_PM_at    | STAC3    | SH3 and cysteine rich domain 3                                          | 0.0005 | -1.84 | Normal down vs > 5 Years Off IS Tolerant |
| 231514_PM_at    | C1orf94  | chromosome 1 open reading frame 94                                      | 0.0005 | -1.60 | Normal down vs > 5 Years Off IS Tolerant |
| 1560080_PM_at   | ---      | ---                                                                     | 0.0005 | -1.64 | Normal down vs > 5 Years Off IS Tolerant |
| 232727_PM_at    | UCKL1    | Uridine-cytidine kinase 1-like 1                                        | 0.0005 | -1.36 | Normal down vs > 5 Years Off IS Tolerant |
| 222382_PM_x_at  | NUP205   | nucleoporin 205kDa                                                      | 0.0005 | 1.45  | Normal up vs > 5 Years Off IS Tolerant   |
| 224832_PM_at    | DUSP16   | dual specificity phosphatase 16                                         | 0.0005 | 2.06  | Normal up vs > 5 Years Off IS Tolerant   |
| 1561313_PM_at   | ---      | ---                                                                     | 0.0005 | -1.57 | Normal down vs > 5 Years Off IS Tolerant |
| 201480_PM_s_at  | SUPT5H   | suppressor of Ty 5 homolog (S. cerevisiae)                              | 0.0005 | 1.36  | Normal up vs > 5 Years Off IS Tolerant   |
| 228641_PM_at    | CARD8    | caspase recruitment domain family, member 8                             | 0.0005 | 1.81  | Normal up vs > 5 Years Off IS Tolerant   |
| 1557257_PM_at   | BCL10    | B-cell CLL/lymphoma 10                                                  | 0.0005 | 2.70  | Normal up vs > 5 Years Off IS Tolerant   |
| 1570119_PM_at   | PDS5B    | PDS5, regulator of cohesion maintenance, homolog B (S. cerevisiae)      | 0.0005 | -1.37 | Normal down vs > 5 Years Off IS Tolerant |
| 233677_PM_at    | ---      | ---                                                                     | 0.0005 | 1.50  | Normal up vs > 5 Years Off IS Tolerant   |
| 201440_PM_at    | DDX23    | DEAD (Asp-Glu-Ala-Asp) box polypeptide 23                               | 0.0005 | 1.87  | Normal up vs > 5 Years Off IS Tolerant   |
| 203012_PM_x_at  | RPL23A   | ribosomal protein L23a                                                  | 0.0005 | 1.17  | Normal up vs > 5 Years Off IS Tolerant   |
| 206184_PM_at    | CRKL     | v-crkl sarcoma virus CT10 oncogene homolog (avian)-like                 | 0.0005 | -1.38 | Normal down vs > 5 Years Off IS Tolerant |
| 203208_PM_s_at  | MTFR1    | mitochondrial fission regulator 1                                       | 0.0005 | -1.67 | Normal down vs > 5 Years Off IS Tolerant |
| 221928_PM_at    | ACACB    | acetyl-CoA carboxylase beta                                             | 0.0005 | 1.56  | Normal up vs > 5 Years Off IS Tolerant   |
| 1560631_PM_at   | CALCOCO2 | calcium binding and coiled-coil domain 2                                | 0.0005 | -1.75 | Normal down vs > 5 Years Off IS Tolerant |
| 1555972_PM_s_at | FBXO28   | F-box protein 28                                                        | 0.0005 | -1.91 | Normal down vs > 5 Years Off IS Tolerant |
| 242356_PM_at    | VT11A    | Vesicle transport through interaction with t-SNAREs homolog 1A (yeast)  | 0.0005 | 1.89  | Normal up vs > 5 Years Off IS Tolerant   |
| 218083_PM_at    | PTGES2   | prostaglandin E synthase 2                                              | 0.0005 | -1.50 | Normal down vs > 5 Years Off IS Tolerant |

|                 |                      |                                                                                       |        |       |                                          |
|-----------------|----------------------|---------------------------------------------------------------------------------------|--------|-------|------------------------------------------|
| 1556518_PM_at   | ---                  | ---                                                                                   | 0.0005 | -1.29 | Normal down vs > 5 Years Off IS Tolerant |
| 228261_PM_at    | MIB2                 | mindbomb homolog 2 (Drosophila)                                                       | 0.0005 | 1.65  | Normal up vs > 5 Years Off IS Tolerant   |
| 222765_PM_x_at  | ESF1                 | ESF1, nucleolar pre-rRNA processing protein, homolog (S. cerevisiae)                  | 0.0005 | 1.91  | Normal up vs > 5 Years Off IS Tolerant   |
| 203357_PM_s_at  | CAPN7                | calpain 7                                                                             | 0.0005 | 2.37  | Normal up vs > 5 Years Off IS Tolerant   |
| 239701_PM_at    | ---                  | ---                                                                                   | 0.0005 | -1.99 | Normal down vs > 5 Years Off IS Tolerant |
| 226909_PM_at    | ZNF518B              | zinc finger protein 518B                                                              | 0.0005 | 1.71  | Normal up vs > 5 Years Off IS Tolerant   |
| 222676_PM_at    | BRI3 /// FLJ30064    | brain protein I3 /// hypothetical protein LOC644975                                   | 0.0005 | -1.44 | Normal down vs > 5 Years Off IS Tolerant |
| 213035_PM_at    | ANKRD28              | ankyrin repeat domain 28                                                              | 0.0005 | 1.89  | Normal up vs > 5 Years Off IS Tolerant   |
| 227402_PM_s_at  | UTP23                | UTP23, small subunit (SSU) processome component, homolog (yeast)                      | 0.0005 | 1.32  | Normal up vs > 5 Years Off IS Tolerant   |
| 214306_PM_at    | OPA1                 | optic atrophy 1 (autosomal dominant)                                                  | 0.0005 | -1.71 | Normal down vs > 5 Years Off IS Tolerant |
| 235418_PM_at    | FAHD2A /// LOC285014 | fumarylacetoacetate hydrolase domain containing 2A /// hypothetical protein LOC285014 | 0.0005 | 1.43  | Normal up vs > 5 Years Off IS Tolerant   |
| 214523_PM_at    | CEBPE                | CCAAT/enhancer binding protein (C/EBP), epsilon                                       | 0.0005 | -1.35 | Normal down vs > 5 Years Off IS Tolerant |
| 240056_PM_at    | NSMAF                | Neutral sphingomyelinase (N-SMase) activation associated factor                       | 0.0005 | -1.34 | Normal down vs > 5 Years Off IS Tolerant |
| 223161_PM_at    | KIAA1147             | KIAA1147                                                                              | 0.0005 | 1.85  | Normal up vs > 5 Years Off IS Tolerant   |
| 1569013_PM_s_at | LOC96610             | BMS1 homolog, ribosome assembly protein (yeast) pseudogene                            | 0.0005 | -2.30 | Normal down vs > 5 Years Off IS Tolerant |
| 233330_PM_s_at  | ---                  | ---                                                                                   | 0.0005 | -3.14 | Normal down vs > 5 Years Off IS Tolerant |
| 217057_PM_s_at  | GNAS                 | GNAS complex locus                                                                    | 0.0005 | -1.31 | Normal down vs > 5 Years Off IS Tolerant |
| 212838_PM_at    | DNMBP                | dynamamin binding protein                                                             | 0.0005 | 2.41  | Normal up vs > 5 Years Off IS Tolerant   |
| 226868_PM_at    | GXYLT1               | glucoside xylosyltransferase 1                                                        | 0.0005 | -1.81 | Normal down vs > 5 Years Off IS Tolerant |
| 242832_PM_at    | PER1                 | period homolog 1 (Drosophila)                                                         | 0.0005 | 2.48  | Normal up vs > 5 Years Off IS Tolerant   |
| 241783_PM_at    | ---                  | ---                                                                                   | 0.0005 | -1.41 | Normal down vs > 5 Years Off IS Tolerant |
| 232000_PM_at    | TTC39B               | Tetratricopeptide repeat domain 39B                                                   | 0.0005 | 2.60  | Normal up vs > 5 Years Off IS Tolerant   |
| 1568849_PM_at   | NCRNA00165           | non-protein coding RNA 165                                                            | 0.0005 | -1.35 | Normal down vs > 5 Years Off IS Tolerant |

|                 |                                          |                                                                                         |        |       |                                          |
|-----------------|------------------------------------------|-----------------------------------------------------------------------------------------|--------|-------|------------------------------------------|
| 1555536_PM_at   | ANTXR2                                   | anthrax toxin receptor 2                                                                | 0.0005 | -1.56 | Normal down vs > 5 Years Off IS Tolerant |
| 212068_PM_s_at  | BAT2L1                                   | HLA-B associated transcript 2-like 1                                                    | 0.0005 | 1.56  | Normal up vs > 5 Years Off IS Tolerant   |
| 209710_PM_at    | GATA2                                    | GATA binding protein 2                                                                  | 0.0005 | -1.92 | Normal down vs > 5 Years Off IS Tolerant |
| 237040_PM_at    | CWF19L2                                  | CWF19-like 2, cell cycle control ( <i>S. pombe</i> )                                    | 0.0005 | 1.90  | Normal up vs > 5 Years Off IS Tolerant   |
| 1554680_PM_s_at | KCNS2                                    | potassium voltage-gated channel, delayed-rectifier, subfamily S, member 2               | 0.0005 | -1.66 | Normal down vs > 5 Years Off IS Tolerant |
| 202542_PM_s_at  | AIMP1                                    | aminoacyl tRNA synthetase complex-interacting multifunctional protein 1                 | 0.0005 | 1.42  | Normal up vs > 5 Years Off IS Tolerant   |
| 208984_PM_x_at  | RBM10                                    | RNA binding motif protein 10                                                            | 0.0005 | 1.33  | Normal up vs > 5 Years Off IS Tolerant   |
| 1554534_PM_at   | DPYD                                     | dihydropyrimidine dehydrogenase                                                         | 0.0005 | -1.49 | Normal down vs > 5 Years Off IS Tolerant |
| 236539_PM_at    | PTPN22                                   | protein tyrosine phosphatase, non-receptor type 22 (lymphoid)                           | 0.0005 | 1.99  | Normal up vs > 5 Years Off IS Tolerant   |
| 227757_PM_at    | CUL4A                                    | cullin 4A                                                                               | 0.0005 | 2.35  | Normal up vs > 5 Years Off IS Tolerant   |
| 228805_PM_at    | C5orf25                                  | chromosome 5 open reading frame 25                                                      | 0.0005 | 2.12  | Normal up vs > 5 Years Off IS Tolerant   |
| 1562166_PM_at   | ---                                      | ---                                                                                     | 0.0005 | -1.42 | Normal down vs > 5 Years Off IS Tolerant |
| 204377_PM_s_at  | VPRBP                                    | Vpr (HIV-1) binding protein                                                             | 0.0005 | 1.50  | Normal up vs > 5 Years Off IS Tolerant   |
| 201343_PM_at    | UBE2D2                                   | ubiquitin-conjugating enzyme E2D 2 (UBC4/5 homolog, yeast)                              | 0.0005 | 1.52  | Normal up vs > 5 Years Off IS Tolerant   |
| 236712_PM_at    | ---                                      | ---                                                                                     | 0.0005 | -1.71 | Normal down vs > 5 Years Off IS Tolerant |
| 1558948_PM_a_at | ---                                      | ---                                                                                     | 0.0005 | -1.56 | Normal down vs > 5 Years Off IS Tolerant |
| 201664_PM_at    | SMC4                                     | structural maintenance of chromosomes 4                                                 | 0.0005 | 1.49  | Normal up vs > 5 Years Off IS Tolerant   |
| 201572_PM_x_at  | DCTD                                     | dCMP deaminase                                                                          | 0.0005 | 1.54  | Normal up vs > 5 Years Off IS Tolerant   |
| 200749_PM_at    | ---                                      | ---                                                                                     | 0.0005 | 2.10  | Normal up vs > 5 Years Off IS Tolerant   |
| 236295_PM_s_at  | NLRC3                                    | NLR family, CARD domain containing 3                                                    | 0.0005 | 2.08  | Normal up vs > 5 Years Off IS Tolerant   |
| 217754_PM_at    | DDX56                                    | DEAD (Asp-Glu-Ala-Asp) box polypeptide 56                                               | 0.0005 | 1.57  | Normal up vs > 5 Years Off IS Tolerant   |
| 206106_PM_at    | HDAC10 ///<br>LOC100509694 ///<br>MAPK12 | histone deacetylase 10 /// mitogen-activated protein kinase 12-like /// mitogen-activat | 0.0005 | -1.47 | Normal down vs > 5 Years Off IS Tolerant |
| 241839_PM_at    | ---                                      | ---                                                                                     | 0.0005 | -1.38 | Normal down vs > 5 Years Off IS Tolerant |
| 210561_PM_s_at  | WSB1                                     | WD repeat and SOCS box-containing 1                                                     | 0.0005 | -1.73 | Normal down vs > 5 Years Off IS Tolerant |

|                |              |                                                                |        |       |                                          |
|----------------|--------------|----------------------------------------------------------------|--------|-------|------------------------------------------|
| 232903_PM_at   | ---          | ---                                                            | 0.0005 | -1.96 | Normal down vs > 5 Years Off IS Tolerant |
| 239580_PM_at   | GUCY1A3      | guanylate cyclase 1, soluble, alpha 3                          | 0.0005 | -1.86 | Normal down vs > 5 Years Off IS Tolerant |
| 207472_PM_at   | RARS2        | arginyl-tRNA synthetase 2, mitochondrial                       | 0.0005 | -1.31 | Normal down vs > 5 Years Off IS Tolerant |
| 224763_PM_at   | RPL37        | ribosomal protein L37                                          | 0.0005 | 1.96  | Normal up vs > 5 Years Off IS Tolerant   |
| 203553_PM_s_at | MAP4K5       | mitogen-activated protein kinase kinase kinase kinase 5        | 0.0005 | 1.90  | Normal up vs > 5 Years Off IS Tolerant   |
| 222203_PM_s_at | RDH14        | retinol dehydrogenase 14 (all-trans/9-cis/11-cis)              | 0.0005 | 1.80  | Normal up vs > 5 Years Off IS Tolerant   |
| 214148_PM_at   | LOC100507424 | hypothetical LOC100507424                                      | 0.0005 | 1.62  | Normal up vs > 5 Years Off IS Tolerant   |
| 204863_PM_s_at | IL6ST        | interleukin 6 signal transducer (gp130, oncostatin M receptor) | 0.0005 | 2.60  | Normal up vs > 5 Years Off IS Tolerant   |
| 225477_PM_s_at | NR2C2        | nuclear receptor subfamily 2, group C, member 2                | 0.0005 | 1.54  | Normal up vs > 5 Years Off IS Tolerant   |
| 229796_PM_at   | SIX4         | SIX homeobox 4                                                 | 0.0005 | -2.56 | Normal down vs > 5 Years Off IS Tolerant |
| 239368_PM_at   | ---          | ---                                                            | 0.0005 | -1.98 | Normal down vs > 5 Years Off IS Tolerant |
| 233939_PM_at   | REXO1        | REX1, RNA exonuclease 1 homolog ( <i>S. cerevisiae</i> )       | 0.0005 | -1.58 | Normal down vs > 5 Years Off IS Tolerant |
| 206488_PM_s_at | CD36         | CD36 molecule (thrombospondin receptor)                        | 0.0005 | -1.83 | Normal down vs > 5 Years Off IS Tolerant |
| 218236_PM_s_at | PRKD3        | protein kinase D3                                              | 0.0005 | 1.66  | Normal up vs > 5 Years Off IS Tolerant   |
| 238864_PM_at   | VWA3A        | von Willebrand factor A domain containing 3A                   | 0.0005 | -1.36 | Normal down vs > 5 Years Off IS Tolerant |
| 215245_PM_x_at | FMR1         | fragile X mental retardation 1                                 | 0.0005 | 1.58  | Normal up vs > 5 Years Off IS Tolerant   |
| 227690_PM_at   | GABRB3       | gamma-aminobutyric acid (GABA) A receptor, beta 3              | 0.0005 | -1.36 | Normal down vs > 5 Years Off IS Tolerant |
| 227337_PM_at   | ANKRD37      | ankyrin repeat domain 37                                       | 0.0005 | 3.05  | Normal up vs > 5 Years Off IS Tolerant   |
| 213613_PM_s_at | NADK         | NAD kinase                                                     | 0.0005 | -1.44 | Normal down vs > 5 Years Off IS Tolerant |
| 232528_PM_at   | ---          | ---                                                            | 0.0005 | 2.11  | Normal up vs > 5 Years Off IS Tolerant   |
| 211813_PM_x_at | DCN          | decorin                                                        | 0.0005 | -1.92 | Normal down vs > 5 Years Off IS Tolerant |
| 233970_PM_s_at | TRMT6        | tRNA methyltransferase 6 homolog ( <i>S. cerevisiae</i> )      | 0.0005 | 2.36  | Normal up vs > 5 Years Off IS Tolerant   |
| 232683_PM_s_at | PARP6        | poly (ADP-ribose) polymerase family, member 6                  | 0.0005 | 1.41  | Normal up vs > 5 Years Off IS Tolerant   |
| 229310_PM_at   | KLHL29       | kelch-like 29 ( <i>Drosophila</i> )                            | 0.0005 | 1.71  | Normal up vs > 5 Years Off IS Tolerant   |
| 1554085_PM_at  | DDX51        | DEAD (Asp-Glu-Ala-Asp) box polypeptide 51                      | 0.0005 | 1.97  | Normal up vs > 5 Years Off IS Tolerant   |

|                 |              |                                                                                     |        |       |                                          |
|-----------------|--------------|-------------------------------------------------------------------------------------|--------|-------|------------------------------------------|
| 215211_PM_at    | RRN3P1       | RNA polymerase I transcription factor homolog ( <i>S. cerevisiae</i> ) pseudogene 1 | 0.0005 | 1.98  | Normal up vs > 5 Years Off IS Tolerant   |
| 206789_PM_s_at  | POU2F1       | POU class 2 homeobox 1                                                              | 0.0005 | 1.45  | Normal up vs > 5 Years Off IS Tolerant   |
| 1565579_PM_at   | ---          | ---                                                                                 | 0.0005 | 3.27  | Normal up vs > 5 Years Off IS Tolerant   |
| 234465_PM_at    | EME1         | essential meiotic endonuclease 1 homolog 1 ( <i>S. pombe</i> )                      | 0.0005 | -1.50 | Normal down vs > 5 Years Off IS Tolerant |
| 231651_PM_at    | ---          | ---                                                                                 | 0.0005 | -1.41 | Normal down vs > 5 Years Off IS Tolerant |
| 203052_PM_at    | C2           | complement component 2                                                              | 0.0005 | -1.68 | Normal down vs > 5 Years Off IS Tolerant |
| 230779_PM_at    | TNRC6B       | trinucleotide repeat containing 6B                                                  | 0.0005 | 1.65  | Normal up vs > 5 Years Off IS Tolerant   |
| 201351_PM_s_at  | YME1L1       | YME1-like 1 ( <i>S. cerevisiae</i> )                                                | 0.0005 | 1.51  | Normal up vs > 5 Years Off IS Tolerant   |
| 239758_PM_at    | ---          | ---                                                                                 | 0.0005 | 1.94  | Normal up vs > 5 Years Off IS Tolerant   |
| 237270_PM_at    | LOC100508368 | hypothetical LOC100508368                                                           | 0.0005 | -1.36 | Normal down vs > 5 Years Off IS Tolerant |
| 218253_PM_s_at  | LGTN         | ligatin                                                                             | 0.0005 | 1.75  | Normal up vs > 5 Years Off IS Tolerant   |
| 223942_PM_x_at  | CHST5        | carbohydrate (N-acetylglucosamine 6-O) sulfotransferase 5                           | 0.0005 | -1.44 | Normal down vs > 5 Years Off IS Tolerant |
| 218307_PM_at    | RSAD1        | radical S-adenosyl methionine domain containing 1                                   | 0.0005 | 1.66  | Normal up vs > 5 Years Off IS Tolerant   |
| 231807_PM_at    | KIAA1217     | KIAA1217                                                                            | 0.0005 | -1.38 | Normal down vs > 5 Years Off IS Tolerant |
| 213127_PM_s_at  | MED8         | mediator complex subunit 8                                                          | 0.0005 | -1.86 | Normal down vs > 5 Years Off IS Tolerant |
| 203068_PM_at    | KLHL21       | kelch-like 21 ( <i>Drosophila</i> )                                                 | 0.0005 | 1.65  | Normal up vs > 5 Years Off IS Tolerant   |
| 201993_PM_x_at  | HNRPDL       | heterogeneous nuclear ribonucleoprotein D-like                                      | 0.0005 | 1.21  | Normal up vs > 5 Years Off IS Tolerant   |
| 219205_PM_at    | SRR          | serine racemase                                                                     | 0.0005 | -1.59 | Normal down vs > 5 Years Off IS Tolerant |
| 1555920_PM_at   | CBX3         | Chromobox homolog 3 (HP1 gamma homolog, <i>Drosophila</i> )                         | 0.0005 | 1.69  | Normal up vs > 5 Years Off IS Tolerant   |
| 229990_PM_at    | LOC641467    | hypothetical LOC641467                                                              | 0.0005 | -1.38 | Normal down vs > 5 Years Off IS Tolerant |
| 228040_PM_at    | MGC21881     | hypothetical locus MGC21881                                                         | 0.0005 | -1.92 | Normal down vs > 5 Years Off IS Tolerant |
| 227174_PM_at    | WDR72        | WD repeat domain 72                                                                 | 0.0005 | -2.19 | Normal down vs > 5 Years Off IS Tolerant |
| 1557018_PM_a_at | ---          | ---                                                                                 | 0.0005 | -1.37 | Normal down vs > 5 Years Off IS Tolerant |
| 1556985_PM_at   | ---          | ---                                                                                 | 0.0005 | -1.25 | Normal down vs > 5 Years Off IS Tolerant |

|                |              |                                                                  |        |       |                                          |
|----------------|--------------|------------------------------------------------------------------|--------|-------|------------------------------------------|
| 1569003_PM_at  | TMEM49       | transmembrane protein 49                                         | 0.0005 | -2.23 | Normal down vs > 5 Years Off IS Tolerant |
| 202320_PM_at   | GTF3C1       | general transcription factor IIIC, polypeptide 1, alpha 220kDa   | 0.0005 | 1.79  | Normal up vs > 5 Years Off IS Tolerant   |
| 224435_PM_at   | C10orf58     | chromosome 10 open reading frame 58                              | 0.0005 | 1.94  | Normal up vs > 5 Years Off IS Tolerant   |
| 229613_PM_at   | ---          | ---                                                              | 0.0005 | 1.42  | Normal up vs > 5 Years Off IS Tolerant   |
| 203005_PM_at   | LTBR         | lymphotoxin beta receptor (TNFR superfamily, member 3)           | 0.0005 | -2.23 | Normal down vs > 5 Years Off IS Tolerant |
| 236435_PM_at   | ---          | ---                                                              | 0.0005 | 2.23  | Normal up vs > 5 Years Off IS Tolerant   |
| 243749_PM_s_at | ---          | ---                                                              | 0.0005 | -1.45 | Normal down vs > 5 Years Off IS Tolerant |
| 230669_PM_at   | RASA2        | RAS p21 protein activator 2                                      | 0.0005 | 1.74  | Normal up vs > 5 Years Off IS Tolerant   |
| 236075_PM_s_at | LOC100506676 | hypothetical LOC100506676                                        | 0.0005 | 2.18  | Normal up vs > 5 Years Off IS Tolerant   |
| 225787_PM_at   | UBE2F        | ubiquitin-conjugating enzyme E2F (putative)                      | 0.0005 | 2.05  | Normal up vs > 5 Years Off IS Tolerant   |
| 212373_PM_at   | FEM1B        | fem-1 homolog b (C. elegans)                                     | 0.0005 | 1.99  | Normal up vs > 5 Years Off IS Tolerant   |
| 202971_PM_s_at | DYRK2        | dual-specificity tyrosine-(Y)-phosphorylation regulated kinase 2 | 0.0005 | 2.12  | Normal up vs > 5 Years Off IS Tolerant   |
| 226638_PM_at   | ARHGAP23     | Rho GTPase activating protein 23                                 | 0.0005 | -1.50 | Normal down vs > 5 Years Off IS Tolerant |
| 244571_PM_s_at | TTC12        | Tetratricopeptide repeat domain 12                               | 0.0005 | 1.59  | Normal up vs > 5 Years Off IS Tolerant   |
| 221607_PM_x_at | ACTG1        | actin, gamma 1                                                   | 0.0005 | -1.16 | Normal down vs > 5 Years Off IS Tolerant |
| 1565583_PM_at  | ZSCAN5A      | zinc finger and SCAN domain containing 5A                        | 0.0005 | -1.54 | Normal down vs > 5 Years Off IS Tolerant |
| 220185_PM_at   | SPTBN4       | spectrin, beta, non-erythrocytic 4                               | 0.0005 | -1.42 | Normal down vs > 5 Years Off IS Tolerant |
| 219587_PM_at   | TTC12        | tetratricopeptide repeat domain 12                               | 0.0005 | 1.64  | Normal up vs > 5 Years Off IS Tolerant   |
| 1561300_PM_at  | ---          | ---                                                              | 0.0005 | -1.29 | Normal down vs > 5 Years Off IS Tolerant |
| 240609_PM_at   | ---          | ---                                                              | 0.0005 | -1.40 | Normal down vs > 5 Years Off IS Tolerant |
| 222279_PM_at   | LOC285830    | hypothetical LOC285830                                           | 0.0005 | 1.63  | Normal up vs > 5 Years Off IS Tolerant   |
| 211276_PM_at   | TCEAL2       | transcription elongation factor A (SII)-like 2                   | 0.0005 | 1.38  | Normal up vs > 5 Years Off IS Tolerant   |
| 207612_PM_at   | WNT8B        | wingless-type MMTV integration site family, member 8B            | 0.0006 | -1.52 | Normal down vs > 5 Years Off IS Tolerant |
| 201535_PM_at   | UBL3         | ubiquitin-like 3                                                 | 0.0006 | 1.53  | Normal up vs > 5 Years Off IS Tolerant   |
| 228397_PM_at   | TUG1         | taurine upregulated 1 (non-protein coding)                       | 0.0006 | 2.50  | Normal up vs > 5 Years Off IS Tolerant   |
| 214582_PM_at   | PDE3B        | phosphodiesterase 3B, cGMP-inhibited                             | 0.0006 | 2.40  | Normal up vs > 5 Years Off IS Tolerant   |
| 208993_PM_s_at | PIIG         | peptidylprolyl isomerase G (cyclophilin G)                       | 0.0006 | 1.29  | Normal up vs > 5 Years Off IS Tolerant   |



|                |                            |                                                                                        |        |       |                                          |
|----------------|----------------------------|----------------------------------------------------------------------------------------|--------|-------|------------------------------------------|
| 228583_PM_at   | LIN52                      | lin-52 homolog (C. elegans)                                                            | 0.0006 | 2.09  | Normal up vs > 5 Years Off IS Tolerant   |
| 240862_PM_at   | RASGRP4                    | RAS guanyl releasing protein 4                                                         | 0.0006 | -1.46 | Normal down vs > 5 Years Off IS Tolerant |
| 240925_PM_at   | ---                        | ---                                                                                    | 0.0006 | -1.47 | Normal down vs > 5 Years Off IS Tolerant |
| 218650_PM_at   | DGCR8                      | DiGeorge syndrome critical region gene 8                                               | 0.0006 | 2.03  | Normal up vs > 5 Years Off IS Tolerant   |
| 217130_PM_at   | ---                        | ---                                                                                    | 0.0006 | -1.34 | Normal down vs > 5 Years Off IS Tolerant |
| 205133_PM_s_at | HSPE1                      | heat shock 10kDa protein 1 (chaperonin 10)                                             | 0.0006 | 1.75  | Normal up vs > 5 Years Off IS Tolerant   |
| 216351_PM_x_at | DAZ1 /// DAZ2 /// DAZ4     | deleted in azoospermia 1 /// deleted in azoospermia 2 /// deleted in azoospermia 4     | 0.0006 | -2.67 | Normal down vs > 5 Years Off IS Tolerant |
| 240049_PM_at   | ---                        | ---                                                                                    | 0.0006 | -1.31 | Normal down vs > 5 Years Off IS Tolerant |
| 203935_PM_at   | ACVR1                      | activin A receptor, type I                                                             | 0.0006 | 1.72  | Normal up vs > 5 Years Off IS Tolerant   |
| 203723_PM_at   | ITPKB                      | inositol 1,4,5-trisphosphate 3-kinase B                                                | 0.0006 | 1.88  | Normal up vs > 5 Years Off IS Tolerant   |
| 208463_PM_at   | GABRA4                     | gamma-aminobutyric acid (GABA) A receptor, alpha 4                                     | 0.0006 | -1.87 | Normal down vs > 5 Years Off IS Tolerant |
| 207435_PM_s_at | SRRM2                      | serine/arginine repetitive matrix 2                                                    | 0.0006 | 1.27  | Normal up vs > 5 Years Off IS Tolerant   |
| 232433_PM_at   | KIAA1683                   | KIAA1683                                                                               | 0.0006 | -1.52 | Normal down vs > 5 Years Off IS Tolerant |
| 237157_PM_at   | ---                        | ---                                                                                    | 0.0006 | -1.39 | Normal down vs > 5 Years Off IS Tolerant |
| 214518_PM_at   | PDHA2                      | pyruvate dehydrogenase (lipoamide) alpha 2                                             | 0.0006 | -1.61 | Normal down vs > 5 Years Off IS Tolerant |
| 221240_PM_s_at | B3GNT4                     | UDP-GlcNAc:betaGal beta-1,3-N-acetylglucosaminyltransferase 4                          | 0.0006 | -1.44 | Normal down vs > 5 Years Off IS Tolerant |
| 39854_PM_r_at  | PNPLA2                     | patatin-like phospholipase domain containing 2                                         | 0.0006 | -1.53 | Normal down vs > 5 Years Off IS Tolerant |
| 1565778_PM_at  | ABCA8                      | ATP-binding cassette, sub-family A (ABC1), member 8                                    | 0.0006 | -1.41 | Normal down vs > 5 Years Off IS Tolerant |
| 205114_PM_s_at | CCL3 /// CCL3L1 /// CCL3L3 | chemokine (C-C motif) ligand 3 /// chemokine (C-C motif) ligand 3-like 1 /// chemokine | 0.0006 | 5.18  | Normal up vs > 5 Years Off IS Tolerant   |
| 229590_PM_at   | RPL13                      | ribosomal protein L13                                                                  | 0.0006 | 1.81  | Normal up vs > 5 Years Off IS Tolerant   |
| 200985_PM_s_at | CD59                       | CD59 molecule, complement regulatory protein                                           | 0.0006 | 2.07  | Normal up vs > 5 Years Off IS Tolerant   |
| 38398_PM_at    | MADD                       | MAP-kinase activating death domain                                                     | 0.0006 | 1.42  | Normal up vs > 5 Years Off IS Tolerant   |
| 223641_PM_at   | ---                        | ---                                                                                    | 0.0006 | 2.06  | Normal up vs > 5 Years Off IS Tolerant   |
| 225898_PM_at   | WDR54                      | WD repeat domain 54                                                                    | 0.0006 | 1.62  | Normal up vs > 5 Years Off IS Tolerant   |
| 215045_PM_at   | CELF3                      | CUGBP, Elav-like family member 3                                                       | 0.0006 | -1.43 | Normal down vs > 5 Years Off IS Tolerant |

|                |           |                                                        |        |       |                                          |
|----------------|-----------|--------------------------------------------------------|--------|-------|------------------------------------------|
| 234487_PM_at   | ---       | ---                                                    | 0.0006 | -1.60 | Normal down vs > 5 Years Off IS Tolerant |
| 219451_PM_at   | MSRB2     | methionine sulfoxide reductase B2                      | 0.0006 | -1.90 | Normal down vs > 5 Years Off IS Tolerant |
| 203591_PM_s_at | CSF3R     | colony stimulating factor 3 receptor (granulocyte)     | 0.0006 | -1.88 | Normal down vs > 5 Years Off IS Tolerant |
| 231888_PM_at   | ---       | ---                                                    | 0.0006 | -1.61 | Normal down vs > 5 Years Off IS Tolerant |
| 230354_PM_at   | ---       | ---                                                    | 0.0006 | -1.93 | Normal down vs > 5 Years Off IS Tolerant |
| 1568612_PM_at  | GABRG2    | gamma-aminobutyric acid (GABA) A receptor, gamma 2     | 0.0006 | -1.31 | Normal down vs > 5 Years Off IS Tolerant |
| 230011_PM_at   | MEI1      | meiosis inhibitor 1                                    | 0.0006 | 1.76  | Normal up vs > 5 Years Off IS Tolerant   |
| 225492_PM_at   | TMEM33    | transmembrane protein 33                               | 0.0006 | -1.44 | Normal down vs > 5 Years Off IS Tolerant |
| 236958_PM_at   | ---       | ---                                                    | 0.0006 | 1.96  | Normal up vs > 5 Years Off IS Tolerant   |
| 201108_PM_s_at | THBS1     | thrombospondin 1                                       | 0.0006 | 5.55  | Normal up vs > 5 Years Off IS Tolerant   |
| 1553672_PM_at  | ENAH      | enabled homolog (Drosophila)                           | 0.0006 | -1.46 | Normal down vs > 5 Years Off IS Tolerant |
| 224767_PM_at   | RPL37     | ribosomal protein L37                                  | 0.0006 | 1.72  | Normal up vs > 5 Years Off IS Tolerant   |
| 1566550_PM_at  | ---       | ---                                                    | 0.0006 | -1.44 | Normal down vs > 5 Years Off IS Tolerant |
| 218100_PM_s_at | IFT57     | intraflagellar transport 57 homolog (Chlamydomonas)    | 0.0006 | 1.82  | Normal up vs > 5 Years Off IS Tolerant   |
| 230123_PM_at   | ---       | ---                                                    | 0.0006 | 1.79  | Normal up vs > 5 Years Off IS Tolerant   |
| 244008_PM_at   | PARP8     | poly (ADP-ribose) polymerase family, member 8          | 0.0006 | 1.93  | Normal up vs > 5 Years Off IS Tolerant   |
| 209902_PM_at   | ATR       | ataxia telangiectasia and Rad3 related                 | 0.0006 | 1.81  | Normal up vs > 5 Years Off IS Tolerant   |
| 242411_PM_at   | ARL10     | ADP-ribosylation factor-like 10                        | 0.0006 | -1.29 | Normal down vs > 5 Years Off IS Tolerant |
| 227867_PM_at   | C2orf89   | chromosome 2 open reading frame 89                     | 0.0006 | 3.70  | Normal up vs > 5 Years Off IS Tolerant   |
| 219928_PM_s_at | CABYR     | calcium binding tyrosine-(Y)-phosphorylation regulated | 0.0006 | -1.37 | Normal down vs > 5 Years Off IS Tolerant |
| 218298_PM_s_at | C14orf159 | chromosome 14 open reading frame 159                   | 0.0006 | -1.41 | Normal down vs > 5 Years Off IS Tolerant |
| 212696_PM_s_at | RNF4      | ring finger protein 4                                  | 0.0006 | 1.36  | Normal up vs > 5 Years Off IS Tolerant   |
| 1563590_PM_at  | ---       | ---                                                    | 0.0006 | -1.35 | Normal down vs > 5 Years Off IS Tolerant |
| 1554149_PM_at  | CLDND1    | claudin domain containing 1                            | 0.0006 | 1.45  | Normal up vs > 5 Years Off IS Tolerant   |
| 200845_PM_s_at | PRDX6     | peroxiredoxin 6                                        | 0.0006 | 1.33  | Normal up vs > 5 Years Off IS Tolerant   |

|                 |              |                                                                                         |        |       |                                          |
|-----------------|--------------|-----------------------------------------------------------------------------------------|--------|-------|------------------------------------------|
| 209711_PM_at    | SLC35D1      | solute carrier family 35 (UDP-glucuronic acid/UDP-N-acetylgalactosamine dual transporte | 0.0006 | 1.81  | Normal up vs > 5 Years Off IS Tolerant   |
| 219216_PM_at    | ETAA1        | Ewing tumor-associated antigen 1                                                        | 0.0006 | 1.89  | Normal up vs > 5 Years Off IS Tolerant   |
| 216326_PM_s_at  | HDAC3        | histone deacetylase 3                                                                   | 0.0006 | 1.47  | Normal up vs > 5 Years Off IS Tolerant   |
| 210018_PM_x_at  | MALT1        | mucosa associated lymphoid tissue lymphoma translocation gene 1                         | 0.0006 | 1.95  | Normal up vs > 5 Years Off IS Tolerant   |
| 212562_PM_s_at  | CTSZ         | Cathepsin Z                                                                             | 0.0006 | -1.47 | Normal down vs > 5 Years Off IS Tolerant |
| 1570177_PM_at   | ---          | ---                                                                                     | 0.0006 | -1.56 | Normal down vs > 5 Years Off IS Tolerant |
| 215888_PM_at    | PDS5B        | PDS5, regulator of cohesion maintenance, homolog B (S. cerevisiae)                      | 0.0006 | 1.94  | Normal up vs > 5 Years Off IS Tolerant   |
| 214675_PM_at    | NUP188       | nucleoporin 188kDa                                                                      | 0.0006 | -1.39 | Normal down vs > 5 Years Off IS Tolerant |
| 219565_PM_at    | CYP20A1      | cytochrome P450, family 20, subfamily A, polypeptide 1                                  | 0.0006 | 1.49  | Normal up vs > 5 Years Off IS Tolerant   |
| 202560_PM_s_at  | C1orf77      | chromosome 1 open reading frame 77                                                      | 0.0006 | 1.54  | Normal up vs > 5 Years Off IS Tolerant   |
| 219015_PM_s_at  | ALG13        | asparagine-linked glycosylation 13 homolog (S. cerevisiae)                              | 0.0006 | 2.71  | Normal up vs > 5 Years Off IS Tolerant   |
| 208828_PM_at    | POLE3        | polymerase (DNA directed), epsilon 3 (p17 subunit)                                      | 0.0006 | 1.49  | Normal up vs > 5 Years Off IS Tolerant   |
| 206181_PM_at    | SLAMF1       | signaling lymphocytic activation molecule family member 1                               | 0.0006 | 2.16  | Normal up vs > 5 Years Off IS Tolerant   |
| 1570516_PM_s_at | OR51B5       | olfactory receptor, family 51, subfamily B, member 5                                    | 0.0006 | -1.56 | Normal down vs > 5 Years Off IS Tolerant |
| 201584_PM_s_at  | DDX39        | DEAD (Asp-Glu-Ala-Asp) box polypeptide 39                                               | 0.0006 | 1.43  | Normal up vs > 5 Years Off IS Tolerant   |
| 1563241_PM_at   | ---          | ---                                                                                     | 0.0006 | -1.39 | Normal down vs > 5 Years Off IS Tolerant |
| 226030_PM_at    | ACADSB       | acyl-CoA dehydrogenase, short/branched chain                                            | 0.0006 | 1.82  | Normal up vs > 5 Years Off IS Tolerant   |
| 230912_PM_at    | ASPDH        | aspartate dehydrogenase domain containing                                               | 0.0006 | -1.63 | Normal down vs > 5 Years Off IS Tolerant |
| 216403_PM_at    | SP3P         | Sp3 transcription factor pseudogene                                                     | 0.0006 | -1.27 | Normal down vs > 5 Years Off IS Tolerant |
| 202803_PM_s_at  | ITGB2        | integrin, beta 2 (complement component 3 receptor 3 and 4 subunit)                      | 0.0006 | -1.33 | Normal down vs > 5 Years Off IS Tolerant |
| 237009_PM_at    | ---          | ---                                                                                     | 0.0006 | 3.06  | Normal up vs > 5 Years Off IS Tolerant   |
| 244798_PM_at    | LOC100507492 | hypothetical LOC100507492                                                               | 0.0006 | 2.27  | Normal up vs > 5 Years Off IS Tolerant   |
| 230415_PM_at    | ---          | ---                                                                                     | 0.0006 | 1.88  | Normal up vs > 5 Years Off IS Tolerant   |
| 203582_PM_s_at  | RAB4A        | RAB4A, member RAS oncogene family                                                       | 0.0006 | 2.08  | Normal up vs > 5 Years Off IS Tolerant   |
| 203264_PM_s_at  | ARHGEF9      | Cdc42 guanine nucleotide exchange factor (GEF) 9                                        | 0.0006 | 1.60  | Normal up vs > 5 Years Off IS Tolerant   |

|                 |                                                                                             |                                                                                            |        |       |                                          |
|-----------------|---------------------------------------------------------------------------------------------|--------------------------------------------------------------------------------------------|--------|-------|------------------------------------------|
| 236228_PM_at    | LOC100130744                                                                                | hypothetical LOC100130744                                                                  | 0.0006 | 1.61  | Normal up vs > 5 Years Off IS Tolerant   |
| 214598_PM_at    | CLDN8                                                                                       | claudin 8                                                                                  | 0.0006 | -1.81 | Normal down vs > 5 Years Off IS Tolerant |
| 240767_PM_x_at  | LOC100286938                                                                                | hypothetical LOC100286938                                                                  | 0.0006 | -1.45 | Normal down vs > 5 Years Off IS Tolerant |
| 209014_PM_at    | MAGED1                                                                                      | melanoma antigen family D, 1                                                               | 0.0006 | 1.62  | Normal up vs > 5 Years Off IS Tolerant   |
| 232244_PM_at    | KIAA1161                                                                                    | KIAA1161                                                                                   | 0.0006 | -1.80 | Normal down vs > 5 Years Off IS Tolerant |
| 1556989_PM_at   | ---                                                                                         | ---                                                                                        | 0.0006 | -1.39 | Normal down vs > 5 Years Off IS Tolerant |
| 218067_PM_s_at  | ARGLU1                                                                                      | arginine and glutamate rich 1                                                              | 0.0006 | 1.33  | Normal up vs > 5 Years Off IS Tolerant   |
| 224953_PM_at    | YIPF5                                                                                       | Yip1 domain family, member 5                                                               | 0.0006 | -1.93 | Normal down vs > 5 Years Off IS Tolerant |
| 232661_PM_s_at  | C7orf64                                                                                     | chromosome 7 open reading frame 64                                                         | 0.0006 | 1.86  | Normal up vs > 5 Years Off IS Tolerant   |
| 223218_PM_s_at  | NFKBIZ                                                                                      | nuclear factor of kappa light polypeptide gene enhancer in B-cells inhibitor, zeta         | 0.0006 | 1.66  | Normal up vs > 5 Years Off IS Tolerant   |
| 235154_PM_at    | TAF3                                                                                        | TAF3 RNA polymerase II, TATA box binding protein (TBP)-associated factor, 140kDa           | 0.0006 | 1.50  | Normal up vs > 5 Years Off IS Tolerant   |
| 205070_PM_at    | ING3                                                                                        | inhibitor of growth family, member 3                                                       | 0.0006 | 1.53  | Normal up vs > 5 Years Off IS Tolerant   |
| 221992_PM_at    | LOC100507607 ///<br>LOC100507666 ///<br>LOC728734 ///<br>LOC728741 ///<br>NPIPL2 /// NPIPL3 | nuclear pore complex-interacting protein-like 3-like ///<br>nuclear pore complex-interacti | 0.0006 | 2.87  | Normal up vs > 5 Years Off IS Tolerant   |
| 1556593_PM_s_at | ---                                                                                         | ---                                                                                        | 0.0006 | -1.68 | Normal down vs > 5 Years Off IS Tolerant |
| 221112_PM_at    | IL1RAPL2                                                                                    | interleukin 1 receptor accessory protein-like 2                                            | 0.0006 | -1.30 | Normal down vs > 5 Years Off IS Tolerant |
| 238914_PM_at    | DCC                                                                                         | deleted in colorectal carcinoma                                                            | 0.0006 | -1.72 | Normal down vs > 5 Years Off IS Tolerant |
| 1568834_PM_s_at | CCDC90B                                                                                     | coiled-coil domain containing 90B                                                          | 0.0006 | 1.85  | Normal up vs > 5 Years Off IS Tolerant   |
| 1552952_PM_at   | RBMV2FP                                                                                     | RNA binding motif protein, Y-linked, family 2, member F pseudogene                         | 0.0006 | -1.72 | Normal down vs > 5 Years Off IS Tolerant |
| 219961_PM_s_at  | PLK1S1                                                                                      | polo-like kinase 1 substrate 1                                                             | 0.0006 | 1.81  | Normal up vs > 5 Years Off IS Tolerant   |
| 212430_PM_at    | RBM38                                                                                       | RNA binding motif protein 38                                                               | 0.0006 | 2.54  | Normal up vs > 5 Years Off IS Tolerant   |
| 228170_PM_at    | OLIG1                                                                                       | oligodendrocyte transcription factor 1                                                     | 0.0006 | -2.80 | Normal down vs > 5 Years Off IS Tolerant |
| 225314_PM_at    | OClAD2                                                                                      | OClA domain containing 2                                                                   | 0.0006 | 2.52  | Normal up vs > 5 Years Off IS Tolerant   |

|                |           |                                                             |        |       |                                          |
|----------------|-----------|-------------------------------------------------------------|--------|-------|------------------------------------------|
| 1557523_PM_at  | ATP6AP1L  | ATPase, H+ transporting, lysosomal accessory protein 1-like | 0.0006 | -1.67 | Normal down vs > 5 Years Off IS Tolerant |
| 213776_PM_at   | LOC157562 | hypothetical protein LOC157562                              | 0.0006 | -1.52 | Normal down vs > 5 Years Off IS Tolerant |
| 202022_PM_at   | ALDOC     | aldolase C, fructose-bisphosphate                           | 0.0006 | 1.70  | Normal up vs > 5 Years Off IS Tolerant   |
| 221518_PM_s_at | USP47     | ubiquitin specific peptidase 47                             | 0.0006 | 1.33  | Normal up vs > 5 Years Off IS Tolerant   |
| 1552722_PM_at  | ARPP21    | cAMP-regulated phosphoprotein, 21kDa                        | 0.0006 | -1.53 | Normal down vs > 5 Years Off IS Tolerant |
| 228552_PM_s_at | ISYNA1    | inositol-3-phosphate synthase 1                             | 0.0006 | -1.32 | Normal down vs > 5 Years Off IS Tolerant |
| 201367_PM_s_at | ZFP36L2   | zinc finger protein 36, C3H type-like 2                     | 0.0006 | 1.91  | Normal up vs > 5 Years Off IS Tolerant   |
| 205476_PM_at   | CCL20     | chemokine (C-C motif) ligand 20                             | 0.0006 | 6.90  | Normal up vs > 5 Years Off IS Tolerant   |
| 213592_PM_at   | APLNR     | apelin receptor                                             | 0.0006 | -1.44 | Normal down vs > 5 Years Off IS Tolerant |
| 213511_PM_s_at | MTMR1     | myotubularin related protein 1                              | 0.0006 | 1.43  | Normal up vs > 5 Years Off IS Tolerant   |
| 204070_PM_at   | RARRES3   | retinoic acid receptor responder (tazarotene induced) 3     | 0.0006 | 1.73  | Normal up vs > 5 Years Off IS Tolerant   |
| 65086_PM_at    | YIPF2     | Yip1 domain family, member 2                                | 0.0006 | -1.40 | Normal down vs > 5 Years Off IS Tolerant |
| 238192_PM_at   | ---       | ---                                                         | 0.0006 | 1.44  | Normal up vs > 5 Years Off IS Tolerant   |
| 225389_PM_at   | BTBD6     | BTB (POZ) domain containing 6                               | 0.0006 | 1.34  | Normal up vs > 5 Years Off IS Tolerant   |
| 218447_PM_at   | C16orf61  | chromosome 16 open reading frame 61                         | 0.0006 | 1.51  | Normal up vs > 5 Years Off IS Tolerant   |
| 200875_PM_s_at | NOP56     | NOP56 ribonucleoprotein homolog (yeast)                     | 0.0006 | 1.37  | Normal up vs > 5 Years Off IS Tolerant   |
| 227032_PM_at   | PLXNA2    | plexin A2                                                   | 0.0006 | -1.39 | Normal down vs > 5 Years Off IS Tolerant |
| 236168_PM_at   | ---       | ---                                                         | 0.0006 | 2.51  | Normal up vs > 5 Years Off IS Tolerant   |
| 1561133_PM_at  | ---       | ---                                                         | 0.0006 | -1.39 | Normal down vs > 5 Years Off IS Tolerant |
| 202792_PM_s_at | PPP6R2    | protein phosphatase 6, regulatory subunit 2                 | 0.0006 | 1.58  | Normal up vs > 5 Years Off IS Tolerant   |
| 240844_PM_at   | ---       | ---                                                         | 0.0006 | -1.38 | Normal down vs > 5 Years Off IS Tolerant |
| 1554050_PM_at  | SMPDL3B   | sphingomyelin phosphodiesterase, acid-like 3B               | 0.0007 | -1.36 | Normal down vs > 5 Years Off IS Tolerant |
| 232909_PM_s_at | BPTF      | bromodomain PHD finger transcription factor                 | 0.0007 | 1.47  | Normal up vs > 5 Years Off IS Tolerant   |
| 216145_PM_at   | ---       | ---                                                         | 0.0007 | -1.27 | Normal down vs > 5 Years Off IS Tolerant |
| 240556_PM_at   | DCN       | Decorin                                                     | 0.0007 | -2.20 | Normal down vs > 5 Years Off IS Tolerant |

|                |              |                                                                                         |        |       |                                          |
|----------------|--------------|-----------------------------------------------------------------------------------------|--------|-------|------------------------------------------|
| 1557161_PM_at  | LOC100132735 | hypothetical protein LOC100132735                                                       | 0.0007 | -1.62 | Normal down vs > 5 Years Off IS Tolerant |
| 204327_PM_s_at | ZNF202       | zinc finger protein 202                                                                 | 0.0007 | 1.65  | Normal up vs > 5 Years Off IS Tolerant   |
| 226852_PM_at   | MTA3         | metastasis associated 1 family, member 3                                                | 0.0007 | 1.69  | Normal up vs > 5 Years Off IS Tolerant   |
| 230741_PM_at   | ---          | ---                                                                                     | 0.0007 | -1.73 | Normal down vs > 5 Years Off IS Tolerant |
| 201151_PM_s_at | MBNL1        | muscleblind-like (Drosophila)                                                           | 0.0007 | 1.61  | Normal up vs > 5 Years Off IS Tolerant   |
| 223058_PM_at   | FAM107B      | family with sequence similarity 107, member B                                           | 0.0007 | 1.44  | Normal up vs > 5 Years Off IS Tolerant   |
| 223287_PM_s_at | FOXP1        | forkhead box P1                                                                         | 0.0007 | 1.67  | Normal up vs > 5 Years Off IS Tolerant   |
| 223592_PM_s_at | RNF135       | ring finger protein 135                                                                 | 0.0007 | -1.48 | Normal down vs > 5 Years Off IS Tolerant |
| 214470_PM_at   | KLRB1        | killer cell lectin-like receptor subfamily B, member 1                                  | 0.0007 | 2.48  | Normal up vs > 5 Years Off IS Tolerant   |
| 202496_PM_at   | EDC4         | enhancer of mRNA decapping 4                                                            | 0.0007 | 1.43  | Normal up vs > 5 Years Off IS Tolerant   |
| 218428_PM_s_at | REV1         | REV1 homolog (S. cerevisiae)                                                            | 0.0007 | 1.42  | Normal up vs > 5 Years Off IS Tolerant   |
| 213982_PM_s_at | RABGAP1L     | RAB GTPase activating protein 1-like                                                    | 0.0007 | 1.49  | Normal up vs > 5 Years Off IS Tolerant   |
| 48531_PM_at    | TNIP2        | TNFAIP3 interacting protein 2                                                           | 0.0007 | 1.29  | Normal up vs > 5 Years Off IS Tolerant   |
| 203787_PM_at   | SSBP2        | single-stranded DNA binding protein 2                                                   | 0.0007 | 1.74  | Normal up vs > 5 Years Off IS Tolerant   |
| 217451_PM_at   | ---          | ---                                                                                     | 0.0007 | -1.32 | Normal down vs > 5 Years Off IS Tolerant |
| 239718_PM_at   | ---          | ---                                                                                     | 0.0007 | -1.73 | Normal down vs > 5 Years Off IS Tolerant |
| 228026_PM_at   | SIKE1        | suppressor of IKBKE 1                                                                   | 0.0007 | 2.09  | Normal up vs > 5 Years Off IS Tolerant   |
| 212301_PM_at   | RTF1         | Rtf1, Paf1/RNA polymerase II complex component, homolog (S. cerevisiae)                 | 0.0007 | 1.41  | Normal up vs > 5 Years Off IS Tolerant   |
| 223269_PM_at   | POLR3GL      | polymerase (RNA) III (DNA directed) polypeptide G (32kD)-like                           | 0.0007 | 1.50  | Normal up vs > 5 Years Off IS Tolerant   |
| 1552665_PM_at  | LOC84989     | hypothetical LOC84989                                                                   | 0.0007 | -1.34 | Normal down vs > 5 Years Off IS Tolerant |
| 1565879_PM_at  | ---          | ---                                                                                     | 0.0007 | -1.71 | Normal down vs > 5 Years Off IS Tolerant |
| 224585_PM_x_at | ACTG1        | actin, gamma 1                                                                          | 0.0007 | -1.16 | Normal down vs > 5 Years Off IS Tolerant |
| 217707_PM_x_at | SMARCA2      | SWI/SNF related, matrix associated, actin dependent regulator of chromatin, subfamily a | 0.0007 | 1.45  | Normal up vs > 5 Years Off IS Tolerant   |
| 228300_PM_at   | CCDC103      | coiled-coil domain containing 103                                                       | 0.0007 | -1.40 | Normal down vs > 5 Years Off IS Tolerant |
| 213567_PM_at   | KPNA4        | karyopherin alpha 4 (importin alpha 3)                                                  | 0.0007 | 1.91  | Normal up vs > 5 Years Off IS Tolerant   |
| 224787_PM_s_at | RAB18        | RAB18, member RAS oncogene family                                                       | 0.0007 | 1.80  | Normal up vs > 5 Years Off IS Tolerant   |
| 206366_PM_x_at | XCL1         | chemokine (C motif) ligand 1                                                            | 0.0007 | 2.70  | Normal up vs > 5 Years Off IS Tolerant   |

|                 |                              |                                                                                         |        |       |                                          |
|-----------------|------------------------------|-----------------------------------------------------------------------------------------|--------|-------|------------------------------------------|
| 214935_PM_at    | IL4I1 /// NUP62 /// SIGLEC11 | interleukin 4 induced 1 /// nucleoporin 62kDa /// sialic acid binding Ig-like lectin 11 | 0.0007 | -1.38 | Normal down vs > 5 Years Off IS Tolerant |
| 235906_PM_at    | TAF10                        | TAF10 RNA polymerase II, TATA box binding protein (TBP)-associated factor, 30kDa        | 0.0007 | 1.48  | Normal up vs > 5 Years Off IS Tolerant   |
| 215184_PM_at    | DAPK2                        | death-associated protein kinase 2                                                       | 0.0007 | -1.42 | Normal down vs > 5 Years Off IS Tolerant |
| 222612_PM_at    | PSPC1                        | Paraspeckle component 1                                                                 | 0.0007 | 1.64  | Normal up vs > 5 Years Off IS Tolerant   |
| 242439_PM_s_at  | ASXL1                        | additional sex combs like 1 (Drosophila)                                                | 0.0007 | 1.73  | Normal up vs > 5 Years Off IS Tolerant   |
| 214700_PM_x_at  | RIF1                         | RAP1 interacting factor homolog (yeast)                                                 | 0.0007 | 1.68  | Normal up vs > 5 Years Off IS Tolerant   |
| 243066_PM_at    | NPL                          | N-acetylneuraminatase pyruvate lyase (dihydrodipicolinate synthase)                     | 0.0007 | -1.37 | Normal down vs > 5 Years Off IS Tolerant |
| 213350_PM_at    | RPS11                        | Ribosomal protein S11                                                                   | 0.0007 | -3.16 | Normal down vs > 5 Years Off IS Tolerant |
| 1556059_PM_s_at | SPEN                         | spen homolog, transcriptional regulator (Drosophila)                                    | 0.0007 | 1.65  | Normal up vs > 5 Years Off IS Tolerant   |
| 204029_PM_at    | CELSR2                       | cadherin, EGF LAG seven-pass G-type receptor 2 (flamingo homolog, Drosophila)           | 0.0007 | 1.37  | Normal up vs > 5 Years Off IS Tolerant   |
| 221591_PM_s_at  | FAM64A                       | family with sequence similarity 64, member A                                            | 0.0007 | -1.44 | Normal down vs > 5 Years Off IS Tolerant |
| 218532_PM_s_at  | FAM134B                      | family with sequence similarity 134, member B                                           | 0.0007 | 2.17  | Normal up vs > 5 Years Off IS Tolerant   |
| 206861_PM_s_at  | CGGBP1                       | CGG triplet repeat binding protein 1                                                    | 0.0007 | 1.38  | Normal up vs > 5 Years Off IS Tolerant   |
| 1556333_PM_at   | ---                          | ---                                                                                     | 0.0007 | -1.45 | Normal down vs > 5 Years Off IS Tolerant |
| 203329_PM_at    | PTPRM                        | protein tyrosine phosphatase, receptor type, M                                          | 0.0007 | 2.31  | Normal up vs > 5 Years Off IS Tolerant   |
| 204061_PM_at    | PRKX                         | protein kinase, X-linked                                                                | 0.0007 | 1.88  | Normal up vs > 5 Years Off IS Tolerant   |
| 214966_PM_at    | GRIK5                        | glutamate receptor, ionotropic, kainate 5                                               | 0.0007 | -1.35 | Normal down vs > 5 Years Off IS Tolerant |
| 1566207_PM_at   | TCEA1                        | transcription elongation factor A (SII), 1                                              | 0.0007 | 1.42  | Normal up vs > 5 Years Off IS Tolerant   |
| 240193_PM_at    | ---                          | ---                                                                                     | 0.0007 | -1.34 | Normal down vs > 5 Years Off IS Tolerant |
| 210998_PM_s_at  | HGF                          | hepatocyte growth factor (hepapoietin A; scatter factor)                                | 0.0007 | -1.49 | Normal down vs > 5 Years Off IS Tolerant |
| 241471_PM_at    | ---                          | ---                                                                                     | 0.0007 | -1.59 | Normal down vs > 5 Years Off IS Tolerant |
| 1557263_PM_s_at | ---                          | ---                                                                                     | 0.0007 | 1.73  | Normal up vs > 5 Years Off IS Tolerant   |
| 225067_PM_at    | ULK3                         | unc-51-like kinase 3 (C. elegans)                                                       | 0.0007 | 1.49  | Normal up vs > 5 Years Off IS Tolerant   |
| 209068_PM_at    | HNRPDL                       | heterogeneous nuclear ribonucleoprotein D-like                                          | 0.0007 | 1.83  | Normal up vs > 5 Years Off IS Tolerant   |
| 208735_PM_s_at  | CTDSP2                       | CTD (carboxy-terminal domain, RNA polymerase II, polypeptide A) small phosphatase 2     | 0.0007 | 1.74  | Normal up vs > 5 Years Off IS Tolerant   |

|                 |              |                                                                                        |        |       |                                          |
|-----------------|--------------|----------------------------------------------------------------------------------------|--------|-------|------------------------------------------|
| 200614_PM_at    | CLTC         | clathrin, heavy chain (Hc)                                                             | 0.0007 | -1.45 | Normal down vs > 5 Years Off IS Tolerant |
| 212459_PM_x_at  | SUCLG2       | succinate-CoA ligase, GDP-forming, beta subunit                                        | 0.0007 | 1.70  | Normal up vs > 5 Years Off IS Tolerant   |
| 1555350_PM_at   | PPHLN1       | periphilin 1                                                                           | 0.0007 | 1.42  | Normal up vs > 5 Years Off IS Tolerant   |
| 216304_PM_x_at  | YME1L1       | YME1-like 1 ( <i>S. cerevisiae</i> )                                                   | 0.0007 | 1.39  | Normal up vs > 5 Years Off IS Tolerant   |
| 1558122_PM_s_at | CSRNP3       | cysteine-serine-rich nuclear protein 3                                                 | 0.0007 | -1.73 | Normal down vs > 5 Years Off IS Tolerant |
| 213105_PM_s_at  | C16orf42     | chromosome 16 open reading frame 42                                                    | 0.0007 | 1.61  | Normal up vs > 5 Years Off IS Tolerant   |
| 1565918_PM_a_at | ---          | ---                                                                                    | 0.0007 | -1.38 | Normal down vs > 5 Years Off IS Tolerant |
| 1560062_PM_at   | SLC29A2      | Solute carrier family 29 (nucleoside transporters), member 2                           | 0.0007 | -1.38 | Normal down vs > 5 Years Off IS Tolerant |
| 236743_PM_at    | AGPAT6       | 1-acylglycerol-3-phosphate O-acyltransferase 6 (lysophosphatidic acid acyltransferase, | 0.0007 | 1.60  | Normal up vs > 5 Years Off IS Tolerant   |
| 226624_PM_at    | ---          | ---                                                                                    | 0.0007 | 1.44  | Normal up vs > 5 Years Off IS Tolerant   |
| 216218_PM_s_at  | PLCL2        | phospholipase C-like 2                                                                 | 0.0007 | 1.62  | Normal up vs > 5 Years Off IS Tolerant   |
| 241893_PM_at    | ---          | ---                                                                                    | 0.0007 | 2.31  | Normal up vs > 5 Years Off IS Tolerant   |
| 222887_PM_s_at  | TMEM127      | transmembrane protein 127                                                              | 0.0007 | -1.56 | Normal down vs > 5 Years Off IS Tolerant |
| 212952_PM_at    | LOC100507328 | hypothetical LOC100507328                                                              | 0.0007 | -1.80 | Normal down vs > 5 Years Off IS Tolerant |
| 227514_PM_at    | ITPRIPL2     | inositol 1,4,5-triphosphate receptor interacting protein-like 2                        | 0.0007 | -2.54 | Normal down vs > 5 Years Off IS Tolerant |
| 228932_PM_at    | ---          | ---                                                                                    | 0.0007 | 1.85  | Normal up vs > 5 Years Off IS Tolerant   |
| 213236_PM_at    | SASH1        | SAM and SH3 domain containing 1                                                        | 0.0007 | -2.32 | Normal down vs > 5 Years Off IS Tolerant |
| 1565860_PM_at   | ---          | ---                                                                                    | 0.0007 | -1.34 | Normal down vs > 5 Years Off IS Tolerant |
| 1561339_PM_at   | ---          | ---                                                                                    | 0.0007 | -1.39 | Normal down vs > 5 Years Off IS Tolerant |
| 51774_PM_s_at   | UBE2D4       | ubiquitin-conjugating enzyme E2D 4 (putative)                                          | 0.0007 | -1.51 | Normal down vs > 5 Years Off IS Tolerant |
| 227173_PM_s_at  | BACH2        | BTB and CNC homology 1, basic leucine zipper transcription factor 2                    | 0.0007 | 2.66  | Normal up vs > 5 Years Off IS Tolerant   |
| 1565669_PM_at   | LOC100289071 | Similar to hCG2036912                                                                  | 0.0007 | -1.52 | Normal down vs > 5 Years Off IS Tolerant |
| 1569631_PM_at   | NMNAT1       | nicotinamide nucleotide adenyltransferase 1                                            | 0.0007 | -1.48 | Normal down vs > 5 Years Off IS Tolerant |
| 215359_PM_x_at  | ZNF44        | zinc finger protein 44                                                                 | 0.0007 | 1.61  | Normal up vs > 5 Years Off IS Tolerant   |



|                 |              |                                                                                         |        |       |                                          |
|-----------------|--------------|-----------------------------------------------------------------------------------------|--------|-------|------------------------------------------|
| 218443_PM_s_at  | DAZAP1       | DAZ associated protein 1                                                                | 0.0007 | 1.37  | Normal up vs > 5 Years Off IS Tolerant   |
| 232700_PM_at    | ---          | ---                                                                                     | 0.0007 | 1.54  | Normal up vs > 5 Years Off IS Tolerant   |
| 1559190_PM_s_at | RDH13        | retinol dehydrogenase 13 (all-trans/9-cis)                                              | 0.0007 | 2.00  | Normal up vs > 5 Years Off IS Tolerant   |
| 233019_PM_at    | CNOT7        | CCR4-NOT transcription complex, subunit 7                                               | 0.0007 | 2.16  | Normal up vs > 5 Years Off IS Tolerant   |
| 206544_PM_x_at  | SMARCA2      | SWI/SNF related, matrix associated, actin dependent regulator of chromatin, subfamily a | 0.0007 | 1.61  | Normal up vs > 5 Years Off IS Tolerant   |
| 1556409_PM_a_at | ---          | ---                                                                                     | 0.0007 | -1.44 | Normal down vs > 5 Years Off IS Tolerant |
| 241093_PM_at    | ---          | ---                                                                                     | 0.0007 | 2.39  | Normal up vs > 5 Years Off IS Tolerant   |
| 202616_PM_s_at  | MECP2        | methyl CpG binding protein 2 (Rett syndrome)                                            | 0.0007 | 1.62  | Normal up vs > 5 Years Off IS Tolerant   |
| 1560826_PM_at   | ---          | ---                                                                                     | 0.0007 | -1.57 | Normal down vs > 5 Years Off IS Tolerant |
| 218228_PM_s_at  | TNKS2        | tankyrase, TRF1-interacting ankyrin-related ADP-ribose polymerase 2                     | 0.0007 | 1.98  | Normal up vs > 5 Years Off IS Tolerant   |
| 238012_PM_at    | DPP7         | Dipeptidyl-peptidase 7                                                                  | 0.0007 | 1.85  | Normal up vs > 5 Years Off IS Tolerant   |
| 235754_PM_at    | HFE          | hemochromatosis                                                                         | 0.0007 | -1.59 | Normal down vs > 5 Years Off IS Tolerant |
| 226265_PM_at    | QSER1        | glutamine and serine rich 1                                                             | 0.0007 | -1.86 | Normal down vs > 5 Years Off IS Tolerant |
| 235993_PM_at    | PSMF1        | proteasome (prosome, macropain) inhibitor subunit 1 (PI31)                              | 0.0007 | 1.93  | Normal up vs > 5 Years Off IS Tolerant   |
| 215009_PM_s_at  | LOC100499177 | hypothetical LOC100499177                                                               | 0.0007 | 2.10  | Normal up vs > 5 Years Off IS Tolerant   |
| 205004_PM_at    | NKRF         | NFKB repressing factor                                                                  | 0.0007 | 1.51  | Normal up vs > 5 Years Off IS Tolerant   |
| 227947_PM_at    | PHACTR2      | phosphatase and actin regulator 2                                                       | 0.0007 | 1.74  | Normal up vs > 5 Years Off IS Tolerant   |
| 236358_PM_at    | ---          | ---                                                                                     | 0.0007 | 1.73  | Normal up vs > 5 Years Off IS Tolerant   |
| 238307_PM_at    | ---          | ---                                                                                     | 0.0007 | -1.39 | Normal down vs > 5 Years Off IS Tolerant |
| 215846_PM_at    | ---          | ---                                                                                     | 0.0007 | 1.57  | Normal up vs > 5 Years Off IS Tolerant   |
| 237601_PM_at    | LOC100507277 | hypothetical LOC100507277                                                               | 0.0007 | -1.46 | Normal down vs > 5 Years Off IS Tolerant |
| 235526_PM_at    | SOX6         | SRY (sex determining region Y)-box 6                                                    | 0.0007 | 1.66  | Normal up vs > 5 Years Off IS Tolerant   |
| 202764_PM_at    | STIM1        | stromal interaction molecule 1                                                          | 0.0007 | 1.46  | Normal up vs > 5 Years Off IS Tolerant   |
| 214933_PM_at    | CACNA1A      | calcium channel, voltage-dependent, P/Q type, alpha 1A subunit                          | 0.0007 | -2.15 | Normal down vs > 5 Years Off IS Tolerant |
| 209570_PM_s_at  | D4S234E      | DNA segment on chromosome 4 (unique) 234 expressed sequence                             | 0.0007 | 2.55  | Normal up vs > 5 Years Off IS Tolerant   |
| 202183_PM_s_at  | KIF22        | kinesin family member 22                                                                | 0.0007 | 1.53  | Normal up vs > 5 Years Off IS Tolerant   |
| 238318_PM_at    | ---          | ---                                                                                     | 0.0007 | -1.75 | Normal down vs > 5 Years Off IS Tolerant |

|                |          |                                                                                 |        |       |                                          |
|----------------|----------|---------------------------------------------------------------------------------|--------|-------|------------------------------------------|
| 227146_PM_at   | QSOX2    | quiescin Q6 sulfhydryl oxidase 2                                                | 0.0007 | 1.67  | Normal up vs > 5 Years Off IS Tolerant   |
| 205181_PM_at   | ZNF193   | zinc finger protein 193                                                         | 0.0007 | -1.54 | Normal down vs > 5 Years Off IS Tolerant |
| 235786_PM_at   | ---      | ---                                                                             | 0.0007 | 1.88  | Normal up vs > 5 Years Off IS Tolerant   |
| 239038_PM_at   | C1orf52  | chromosome 1 open reading frame 52                                              | 0.0007 | 1.67  | Normal up vs > 5 Years Off IS Tolerant   |
| 202881_PM_x_at | ---      | ---                                                                             | 0.0007 | -1.51 | Normal down vs > 5 Years Off IS Tolerant |
| 203896_PM_s_at | PLCB4    | phospholipase C, beta 4                                                         | 0.0007 | -1.92 | Normal down vs > 5 Years Off IS Tolerant |
| 208730_PM_x_at | RAB2A    | RAB2A, member RAS oncogene family                                               | 0.0007 | -1.82 | Normal down vs > 5 Years Off IS Tolerant |
| 241991_PM_at   | ---      | ---                                                                             | 0.0007 | 1.95  | Normal up vs > 5 Years Off IS Tolerant   |
| 226670_PM_s_at | PABPC1L  | poly(A) binding protein, cytoplasmic 1-like                                     | 0.0007 | 1.81  | Normal up vs > 5 Years Off IS Tolerant   |
| 209588_PM_at   | EPHB2    | EPH receptor B2                                                                 | 0.0008 | -1.49 | Normal down vs > 5 Years Off IS Tolerant |
| 213170_PM_at   | GPX7     | glutathione peroxidase 7                                                        | 0.0008 | 2.01  | Normal up vs > 5 Years Off IS Tolerant   |
| 222747_PM_s_at | SCML1    | sex comb on midleg-like 1 (Drosophila)                                          | 0.0008 | 2.19  | Normal up vs > 5 Years Off IS Tolerant   |
| 238311_PM_at   | ---      | ---                                                                             | 0.0008 | 1.90  | Normal up vs > 5 Years Off IS Tolerant   |
| 202634_PM_at   | POLR2K   | polymerase (RNA) II (DNA directed) polypeptide K, 7.0kDa                        | 0.0008 | 1.70  | Normal up vs > 5 Years Off IS Tolerant   |
| 229412_PM_at   | TAF8     | TAF8 RNA polymerase II, TATA box binding protein (TBP)-associated factor, 43kDa | 0.0008 | 1.83  | Normal up vs > 5 Years Off IS Tolerant   |
| 203675_PM_at   | NUCB2    | nucleobindin 2                                                                  | 0.0008 | 1.89  | Normal up vs > 5 Years Off IS Tolerant   |
| 227990_PM_at   | SLU7     | SLU7 splicing factor homolog (S. cerevisiae)                                    | 0.0008 | 1.49  | Normal up vs > 5 Years Off IS Tolerant   |
| 234228_PM_at   | ---      | ---                                                                             | 0.0008 | -1.55 | Normal down vs > 5 Years Off IS Tolerant |
| 1554847_PM_at  | ATP6V1B1 | ATPase, H+ transporting, lysosomal 56/58kDa, V1 subunit B1                      | 0.0008 | -1.32 | Normal down vs > 5 Years Off IS Tolerant |
| 1566882_PM_at  | ---      | ---                                                                             | 0.0008 | -1.29 | Normal down vs > 5 Years Off IS Tolerant |
| 230304_PM_at   | ---      | ---                                                                             | 0.0008 | 2.25  | Normal up vs > 5 Years Off IS Tolerant   |
| 236923_PM_x_at | ---      | ---                                                                             | 0.0008 | -1.96 | Normal down vs > 5 Years Off IS Tolerant |
| 225392_PM_at   | GFM2     | G elongation factor, mitochondrial 2                                            | 0.0008 | 1.58  | Normal up vs > 5 Years Off IS Tolerant   |
| 221560_PM_at   | MARK4    | MAP/microtubule affinity-regulating kinase 4                                    | 0.0008 | -1.39 | Normal down vs > 5 Years Off IS Tolerant |
| 207471_PM_at   | ---      | ---                                                                             | 0.0008 | -1.51 | Normal down vs > 5 Years Off IS Tolerant |

|                 |           |                                                                            |        |       |                                          |
|-----------------|-----------|----------------------------------------------------------------------------|--------|-------|------------------------------------------|
| 220061_PM_at    | ACSM5     | acyl-CoA synthetase medium-chain family member 5                           | 0.0008 | -1.67 | Normal down vs > 5 Years Off IS Tolerant |
| 200839_PM_s_at  | CTSB      | cathepsin B                                                                | 0.0008 | -1.51 | Normal down vs > 5 Years Off IS Tolerant |
| 201727_PM_s_at  | ELAVL1    | ELAV (embryonic lethal, abnormal vision, Drosophila)-like 1 (Hu antigen R) | 0.0008 | 1.98  | Normal up vs > 5 Years Off IS Tolerant   |
| 225740_PM_x_at  | MDM4      | Mdm4 p53 binding protein homolog (mouse)                                   | 0.0008 | 1.39  | Normal up vs > 5 Years Off IS Tolerant   |
| 224438_PM_at    | ---       | ---                                                                        | 0.0008 | -1.34 | Normal down vs > 5 Years Off IS Tolerant |
| 232879_PM_at    | CRTC3     | CREB regulated transcription coactivator 3                                 | 0.0008 | 2.06  | Normal up vs > 5 Years Off IS Tolerant   |
| 209961_PM_s_at  | HGF       | hepatocyte growth factor (hepapoietin A; scatter factor)                   | 0.0008 | -1.52 | Normal down vs > 5 Years Off IS Tolerant |
| 229124_PM_at    | PROK1     | prokineticin 1                                                             | 0.0008 | -1.26 | Normal down vs > 5 Years Off IS Tolerant |
| 204706_PM_at    | INPP5E    | inositol polyphosphate-5-phosphatase, 72 kDa                               | 0.0008 | 1.59  | Normal up vs > 5 Years Off IS Tolerant   |
| 1559034_PM_at   | SIRPB2    | signal-regulatory protein beta 2                                           | 0.0008 | -2.80 | Normal down vs > 5 Years Off IS Tolerant |
| 218495_PM_at    | UXT       | ubiquitously-expressed transcript                                          | 0.0008 | 1.49  | Normal up vs > 5 Years Off IS Tolerant   |
| 207151_PM_at    | ADCYAP1R1 | adenylate cyclase activating polypeptide 1 (pituitary) receptor type I     | 0.0008 | -1.26 | Normal down vs > 5 Years Off IS Tolerant |
| 204283_PM_at    | FARS2     | phenylalanyl-tRNA synthetase 2, mitochondrial                              | 0.0008 | 2.32  | Normal up vs > 5 Years Off IS Tolerant   |
| 236529_PM_at    | SRCRB4D   | scavenger receptor cysteine rich domain containing, group B (4 domains)    | 0.0008 | -1.56 | Normal down vs > 5 Years Off IS Tolerant |
| 242725_PM_at    | ---       | ---                                                                        | 0.0008 | 2.13  | Normal up vs > 5 Years Off IS Tolerant   |
| 1554699_PM_at   | L3MBTL4   | l(3)mbt-like 4 (Drosophila)                                                | 0.0008 | -1.30 | Normal down vs > 5 Years Off IS Tolerant |
| 240788_PM_at    | ---       | ---                                                                        | 0.0008 | -1.55 | Normal down vs > 5 Years Off IS Tolerant |
| 228186_PM_s_at  | RSPO3     | R-spondin 3 homolog (Xenopus laevis)                                       | 0.0008 | -1.52 | Normal down vs > 5 Years Off IS Tolerant |
| 235047_PM_x_at  | NACC1     | nucleus accumbens associated 1, BEN and BTB (POZ) domain containing        | 0.0008 | -1.81 | Normal down vs > 5 Years Off IS Tolerant |
| 230118_PM_at    | ---       | ---                                                                        | 0.0008 | -1.54 | Normal down vs > 5 Years Off IS Tolerant |
| 200826_PM_at    | SNRPD2    | small nuclear ribonucleoprotein D2 polypeptide 16.5kDa                     | 0.0008 | 1.49  | Normal up vs > 5 Years Off IS Tolerant   |
| 1568815_PM_a_at | DDX50     | DEAD (Asp-Glu-Ala-Asp) box polypeptide 50                                  | 0.0008 | 2.15  | Normal up vs > 5 Years Off IS Tolerant   |
| 227334_PM_at    | USP54     | ubiquitin specific peptidase 54                                            | 0.0008 | 1.48  | Normal up vs > 5 Years Off IS Tolerant   |

|                |           |                                                                                 |        |       |                                          |
|----------------|-----------|---------------------------------------------------------------------------------|--------|-------|------------------------------------------|
| 235822_PM_at   | COQ9      | coenzyme Q9 homolog ( <i>S. cerevisiae</i> )                                    | 0.0008 | -1.39 | Normal down vs > 5 Years Off IS Tolerant |
| 202253_PM_s_at | DNM2      | dynamain 2                                                                      | 0.0008 | 1.37  | Normal up vs > 5 Years Off IS Tolerant   |
| 1563068_PM_at  | ---       | ---                                                                             | 0.0008 | -1.29 | Normal down vs > 5 Years Off IS Tolerant |
| 205239_PM_at   | AREG      | amphiregulin                                                                    | 0.0008 | 6.93  | Normal up vs > 5 Years Off IS Tolerant   |
| 207528_PM_s_at | SLC7A11   | solute carrier family 7, (cationic amino acid transporter, y+ system) member 11 | 0.0008 | -1.58 | Normal down vs > 5 Years Off IS Tolerant |
| 209969_PM_s_at | STAT1     | signal transducer and activator of transcription 1, 91kDa                       | 0.0008 | -1.82 | Normal down vs > 5 Years Off IS Tolerant |
| 240215_PM_at   | ---       | ---                                                                             | 0.0008 | -1.45 | Normal down vs > 5 Years Off IS Tolerant |
| 218035_PM_s_at | RBM47     | RNA binding motif protein 47                                                    | 0.0008 | -1.80 | Normal down vs > 5 Years Off IS Tolerant |
| 1557296_PM_at  | FLJ12825  | hypothetical LOC440101                                                          | 0.0008 | -1.27 | Normal down vs > 5 Years Off IS Tolerant |
| 214771_PM_x_at | MPRIP     | myosin phosphatase Rho interacting protein                                      | 0.0008 | 1.35  | Normal up vs > 5 Years Off IS Tolerant   |
| 204601_PM_at   | N4BP1     | NEDD4 binding protein 1                                                         | 0.0008 | 1.73  | Normal up vs > 5 Years Off IS Tolerant   |
| 204128_PM_s_at | RFC3      | replication factor C (activator 1) 3, 38kDa                                     | 0.0008 | -1.68 | Normal down vs > 5 Years Off IS Tolerant |
| 217508_PM_s_at | C18orf25  | chromosome 18 open reading frame 25                                             | 0.0008 | 1.59  | Normal up vs > 5 Years Off IS Tolerant   |
| 207094_PM_at   | CXCR1     | chemokine (C-X-C motif) receptor 1                                              | 0.0008 | -1.36 | Normal down vs > 5 Years Off IS Tolerant |
| 215152_PM_at   | MYB       | v-myb myeloblastosis viral oncogene homolog (avian)                             | 0.0008 | -1.32 | Normal down vs > 5 Years Off IS Tolerant |
| 234311_PM_s_at | GTPBP10   | GTP-binding protein 10 (putative)                                               | 0.0008 | 1.87  | Normal up vs > 5 Years Off IS Tolerant   |
| 204694_PM_at   | AFP       | alpha-fetoprotein                                                               | 0.0008 | -1.28 | Normal down vs > 5 Years Off IS Tolerant |
| 244147_PM_at   | ---       | ---                                                                             | 0.0008 | -1.43 | Normal down vs > 5 Years Off IS Tolerant |
| 242399_PM_at   | ---       | ---                                                                             | 0.0008 | -1.77 | Normal down vs > 5 Years Off IS Tolerant |
| 227211_PM_at   | PHF19     | PHD finger protein 19                                                           | 0.0008 | 1.84  | Normal up vs > 5 Years Off IS Tolerant   |
| 202020_PM_s_at | LANCL1    | LanC lantibiotic synthetase component C-like 1 (bacterial)                      | 0.0008 | 1.53  | Normal up vs > 5 Years Off IS Tolerant   |
| 232778_PM_at   | ---       | ---                                                                             | 0.0008 | 1.76  | Normal up vs > 5 Years Off IS Tolerant   |
| 225569_PM_at   | EIF2C2    | Eukaryotic translation initiation factor 2C, 2                                  | 0.0008 | 1.66  | Normal up vs > 5 Years Off IS Tolerant   |
| 1561342_PM_at  | LOC150005 | hypothetical protein LOC150005                                                  | 0.0008 | -1.58 | Normal down vs > 5 Years Off IS Tolerant |

|                 |                  |                                                                                        |        |       |                                          |
|-----------------|------------------|----------------------------------------------------------------------------------------|--------|-------|------------------------------------------|
| 213346_PM_at    | C13orf27         | chromosome 13 open reading frame 27                                                    | 0.0008 | 1.83  | Normal up vs > 5 Years Off IS Tolerant   |
| 211955_PM_at    | IPO5             | importin 5                                                                             | 0.0008 | 1.55  | Normal up vs > 5 Years Off IS Tolerant   |
| 1570269_PM_at   | ---              | ---                                                                                    | 0.0008 | -1.49 | Normal down vs > 5 Years Off IS Tolerant |
| 238904_PM_at    | ---              | ---                                                                                    | 0.0008 | -1.58 | Normal down vs > 5 Years Off IS Tolerant |
| 226866_PM_at    | ESCO1            | establishment of cohesion 1 homolog 1 ( <i>S. cerevisiae</i> )                         | 0.0008 | 1.53  | Normal up vs > 5 Years Off IS Tolerant   |
| 235587_PM_at    | LOC202781        | hypothetical LOC202781                                                                 | 0.0008 | 1.99  | Normal up vs > 5 Years Off IS Tolerant   |
| 220189_PM_s_at  | MGAT4B           | mannosyl (alpha-1,3-)-glycoprotein beta-1,4-N-acetylglucosaminyltransferase, isozyme B | 0.0008 | 1.78  | Normal up vs > 5 Years Off IS Tolerant   |
| 201017_PM_at    | EIF1AX           | eukaryotic translation initiation factor 1A, X-linked                                  | 0.0008 | 1.82  | Normal up vs > 5 Years Off IS Tolerant   |
| 204693_PM_at    | CDC42EP1         | CDC42 effector protein (Rho GTPase binding) 1                                          | 0.0008 | -1.32 | Normal down vs > 5 Years Off IS Tolerant |
| 216944_PM_s_at  | ITPR1            | inositol 1,4,5-triphosphate receptor, type 1                                           | 0.0008 | 1.85  | Normal up vs > 5 Years Off IS Tolerant   |
| 206714_PM_at    | ALOX15B          | arachidonate 15-lipoxygenase, type B                                                   | 0.0008 | -1.30 | Normal down vs > 5 Years Off IS Tolerant |
| 205429_PM_s_at  | MPP6             | membrane protein, palmitoylated 6 (MAGUK p55 subfamily member 6)                       | 0.0008 | 1.52  | Normal up vs > 5 Years Off IS Tolerant   |
| 200728_PM_at    | ACTR2            | ARP2 actin-related protein 2 homolog (yeast)                                           | 0.0008 | -1.36 | Normal down vs > 5 Years Off IS Tolerant |
| 220291_PM_at    | GDPD2            | glycerophosphodiester phosphodiesterase domain containing 2                            | 0.0008 | -1.59 | Normal down vs > 5 Years Off IS Tolerant |
| 1563565_PM_at   | INPP5B           | inositol polyphosphate-5-phosphatase, 75kDa                                            | 0.0008 | -1.33 | Normal down vs > 5 Years Off IS Tolerant |
| 200880_PM_at    | DNAJA1           | DnaJ (Hsp40) homolog, subfamily A, member 1                                            | 0.0008 | 1.47  | Normal up vs > 5 Years Off IS Tolerant   |
| 215477_PM_at    | ---              | ---                                                                                    | 0.0008 | -1.74 | Normal down vs > 5 Years Off IS Tolerant |
| 1555243_PM_x_at | C8orf59          | chromosome 8 open reading frame 59                                                     | 0.0008 | 1.39  | Normal up vs > 5 Years Off IS Tolerant   |
| 205321_PM_at    | EIF2S3           | eukaryotic translation initiation factor 2, subunit 3 gamma, 52kDa                     | 0.0008 | 1.78  | Normal up vs > 5 Years Off IS Tolerant   |
| 219019_PM_at    | LRDD             | leucine-rich repeats and death domain containing                                       | 0.0008 | 1.42  | Normal up vs > 5 Years Off IS Tolerant   |
| 241627_PM_x_at  | ARHGEF40         | Rho guanine nucleotide exchange factor (GEF) 40                                        | 0.0008 | -1.76 | Normal down vs > 5 Years Off IS Tolerant |
| 216104_PM_at    | LOC100505960     | hypothetical LOC100505960                                                              | 0.0008 | -1.87 | Normal down vs > 5 Years Off IS Tolerant |
| 225573_PM_at    | ACAD11 /// NPHP3 | acyl-CoA dehydrogenase family, member 11 /// nephronophthisis 3 (adolescent)           | 0.0008 | 1.60  | Normal up vs > 5 Years Off IS Tolerant   |

|                 |                        |                                                                   |        |       |                                          |
|-----------------|------------------------|-------------------------------------------------------------------|--------|-------|------------------------------------------|
| 217052_PM_x_at  | ---                    | ---                                                               | 0.0008 | -1.91 | Normal down vs > 5 Years Off IS Tolerant |
| 1556385_PM_at   | ---                    | ---                                                               | 0.0008 | 2.21  | Normal up vs > 5 Years Off IS Tolerant   |
| 212936_PM_at    | FAM172A                | family with sequence similarity 172, member A                     | 0.0008 | 1.42  | Normal up vs > 5 Years Off IS Tolerant   |
| 201854_PM_s_at  | ATMIN                  | ATM interactor                                                    | 0.0008 | 1.48  | Normal up vs > 5 Years Off IS Tolerant   |
| 242962_PM_at    | ---                    | ---                                                               | 0.0008 | -1.30 | Normal down vs > 5 Years Off IS Tolerant |
| 1557207_PM_s_at | LOC283177              | hypothetical LOC283177                                            | 0.0008 | -1.41 | Normal down vs > 5 Years Off IS Tolerant |
| 200953_PM_s_at  | CCND2                  | cyclin D2                                                         | 0.0008 | 1.72  | Normal up vs > 5 Years Off IS Tolerant   |
| 1570405_PM_at   | ---                    | ---                                                               | 0.0008 | -1.33 | Normal down vs > 5 Years Off IS Tolerant |
| 202672_PM_s_at  | ATF3                   | activating transcription factor 3                                 | 0.0009 | 5.22  | Normal up vs > 5 Years Off IS Tolerant   |
| 217503_PM_at    | STK17B                 | serine/threonine kinase 17b                                       | 0.0009 | 2.59  | Normal up vs > 5 Years Off IS Tolerant   |
| 239741_PM_at    | LOC283658 ///<br>PYGO1 | hypothetical protein LOC283658 /// pygopus homolog 1 (Drosophila) | 0.0009 | -1.36 | Normal down vs > 5 Years Off IS Tolerant |
| 212331_PM_at    | RBL2                   | retinoblastoma-like 2 (p130)                                      | 0.0009 | 1.61  | Normal up vs > 5 Years Off IS Tolerant   |
| 213739_PM_at    | ---                    | ---                                                               | 0.0009 | 1.39  | Normal up vs > 5 Years Off IS Tolerant   |
| 212313_PM_at    | CHMP7                  | CHMP family, member 7                                             | 0.0009 | 1.82  | Normal up vs > 5 Years Off IS Tolerant   |
| 206472_PM_s_at  | TLE3                   | transducin-like enhancer of split 3 (E(sp1) homolog, Drosophila)  | 0.0009 | 2.27  | Normal up vs > 5 Years Off IS Tolerant   |
| 1563975_PM_at   | RNF130                 | Ring finger protein 130                                           | 0.0009 | -1.86 | Normal down vs > 5 Years Off IS Tolerant |
| 242027_PM_at    | ---                    | ---                                                               | 0.0009 | 2.30  | Normal up vs > 5 Years Off IS Tolerant   |
| 1560755_PM_at   | ---                    | ---                                                               | 0.0009 | -1.26 | Normal down vs > 5 Years Off IS Tolerant |
| 213687_PM_s_at  | RPL35A                 | ribosomal protein L35a                                            | 0.0009 | 1.24  | Normal up vs > 5 Years Off IS Tolerant   |
| 235288_PM_at    | ---                    | ---                                                               | 0.0009 | 1.62  | Normal up vs > 5 Years Off IS Tolerant   |
| 1552929_PM_at   | GRK7                   | G protein-coupled receptor kinase 7                               | 0.0009 | -1.50 | Normal down vs > 5 Years Off IS Tolerant |
| 1563533_PM_at   | GADL1                  | glutamate decarboxylase-like 1                                    | 0.0009 | -1.82 | Normal down vs > 5 Years Off IS Tolerant |
| 216623_PM_x_at  | TOX3                   | TOX high mobility group box family member 3                       | 0.0009 | -1.44 | Normal down vs > 5 Years Off IS Tolerant |
| 231241_PM_at    | LOC645744              | Similar to PCAF associated factor 65 beta                         | 0.0009 | 2.28  | Normal up vs > 5 Years Off IS Tolerant   |
| 212833_PM_at    | SLC25A46               | solute carrier family 25, member 46                               | 0.0009 | 1.43  | Normal up vs > 5 Years Off IS Tolerant   |
| 204234_PM_s_at  | ZNF195                 | zinc finger protein 195                                           | 0.0009 | 2.01  | Normal up vs > 5 Years Off IS Tolerant   |
| 225535_PM_s_at  | TIMM23                 | translocase of inner mitochondrial membrane 23 homolog (yeast)    | 0.0009 | 1.52  | Normal up vs > 5 Years Off IS Tolerant   |

|                 |              |                                                                                         |        |       |                                          |
|-----------------|--------------|-----------------------------------------------------------------------------------------|--------|-------|------------------------------------------|
| 232738_PM_at    | FAM190A      | family with sequence similarity 190, member A                                           | 0.0009 | -1.51 | Normal down vs > 5 Years Off IS Tolerant |
| 230380_PM_at    | LOC100289049 | Hypothetical protein LOC100289049                                                       | 0.0009 | 4.16  | Normal up vs > 5 Years Off IS Tolerant   |
| 203831_PM_at    | R3HDM2       | R3H domain containing 2                                                                 | 0.0009 | 1.32  | Normal up vs > 5 Years Off IS Tolerant   |
| 240735_PM_at    | CDC42BPA     | CDC42 binding protein kinase alpha (DMPK-like)                                          | 0.0009 | -1.58 | Normal down vs > 5 Years Off IS Tolerant |
| 219024_PM_at    | PLEKHA1      | pleckstrin homology domain containing, family A (phosphoinositide binding specific) mem | 0.0009 | 1.64  | Normal up vs > 5 Years Off IS Tolerant   |
| 201896_PM_s_at  | PSRC1        | proline/serine-rich coiled-coil 1                                                       | 0.0009 | -1.71 | Normal down vs > 5 Years Off IS Tolerant |
| 224250_PM_s_at  | SECISBP2     | SECIS binding protein 2                                                                 | 0.0009 | 1.28  | Normal up vs > 5 Years Off IS Tolerant   |
| 213815_PM_x_at  | C19orf29     | chromosome 19 open reading frame 29                                                     | 0.0009 | 1.54  | Normal up vs > 5 Years Off IS Tolerant   |
| 200773_PM_x_at  | PTMA         | prothymosin, alpha                                                                      | 0.0009 | 1.10  | Normal up vs > 5 Years Off IS Tolerant   |
| 213524_PM_s_at  | G0S2         | G0/G1switch 2                                                                           | 0.0009 | 5.21  | Normal up vs > 5 Years Off IS Tolerant   |
| 1569571_PM_at   | LIPJ         | lipase, family member J                                                                 | 0.0009 | -1.31 | Normal down vs > 5 Years Off IS Tolerant |
| 229023_PM_at    | SFT2D3       | SFT2 domain containing 3                                                                | 0.0009 | -1.48 | Normal down vs > 5 Years Off IS Tolerant |
| 223600_PM_s_at  | KIAA1683     | KIAA1683                                                                                | 0.0009 | 1.80  | Normal up vs > 5 Years Off IS Tolerant   |
| 219698_PM_s_at  | METTL4       | methyltransferase like 4                                                                | 0.0009 | 1.99  | Normal up vs > 5 Years Off IS Tolerant   |
| 213558_PM_at    | PCLO         | piccolo (presynaptic cytomatrix protein)                                                | 0.0009 | -1.46 | Normal down vs > 5 Years Off IS Tolerant |
| 228160_PM_at    | LOC339290    | hypothetical LOC339290                                                                  | 0.0009 | 2.21  | Normal up vs > 5 Years Off IS Tolerant   |
| 1569225_PM_a_at | SCML4        | sex comb on midleg-like 4 (Drosophila)                                                  | 0.0009 | 2.42  | Normal up vs > 5 Years Off IS Tolerant   |
| 1569344_PM_a_at | ---          | ---                                                                                     | 0.0009 | -1.51 | Normal down vs > 5 Years Off IS Tolerant |
| 214817_PM_at    | UNC13A       | unc-13 homolog A (C. elegans)                                                           | 0.0009 | -1.37 | Normal down vs > 5 Years Off IS Tolerant |
| 232845_PM_at    | CDH23        | cadherin-related 23                                                                     | 0.0009 | -1.57 | Normal down vs > 5 Years Off IS Tolerant |
| 221880_PM_s_at  | FAM174B      | family with sequence similarity 174, member B                                           | 0.0009 | -1.33 | Normal down vs > 5 Years Off IS Tolerant |
| 202000_PM_at    | NDUFA6       | NADH dehydrogenase (ubiquinone) 1 alpha subcomplex, 6, 14kDa                            | 0.0009 | 1.80  | Normal up vs > 5 Years Off IS Tolerant   |
| 223532_PM_at    | ANKRD39      | ankyrin repeat domain 39                                                                | 0.0009 | 1.77  | Normal up vs > 5 Years Off IS Tolerant   |
| 222640_PM_at    | DNMT3A       | DNA (cytosine-5-)-methyltransferase 3 alpha                                             | 0.0009 | 1.57  | Normal up vs > 5 Years Off IS Tolerant   |
| 216108_PM_at    | ---          | ---                                                                                     | 0.0009 | -1.71 | Normal down vs > 5 Years Off IS Tolerant |

|                 |              |                                                                          |        |       |                                          |
|-----------------|--------------|--------------------------------------------------------------------------|--------|-------|------------------------------------------|
| 210708_PM_x_at  | CASP10       | caspase 10, apoptosis-related cysteine peptidase                         | 0.0009 | -1.39 | Normal down vs > 5 Years Off IS Tolerant |
| 240281_PM_at    | ---          | ---                                                                      | 0.0009 | -1.45 | Normal down vs > 5 Years Off IS Tolerant |
| 225154_PM_at    | SYAP1        | synapse associated protein 1                                             | 0.0009 | 2.46  | Normal up vs > 5 Years Off IS Tolerant   |
| 223028_PM_s_at  | SNX9         | sorting nexin 9                                                          | 0.0009 | 2.69  | Normal up vs > 5 Years Off IS Tolerant   |
| 240908_PM_at    | LOC100507153 | hypothetical LOC100507153                                                | 0.0009 | 1.84  | Normal up vs > 5 Years Off IS Tolerant   |
| 203556_PM_at    | ZHX2         | zinc fingers and homeoboxes 2                                            | 0.0009 | 1.98  | Normal up vs > 5 Years Off IS Tolerant   |
| 203737_PM_s_at  | PPRC1        | peroxisome proliferator-activated receptor gamma, coactivator-related 1  | 0.0009 | 1.68  | Normal up vs > 5 Years Off IS Tolerant   |
| 236860_PM_at    | NPY6R        | neuropeptide Y receptor Y6 (pseudogene)                                  | 0.0009 | -1.89 | Normal down vs > 5 Years Off IS Tolerant |
| 1569032_PM_at   | LOC642852    | hypothetical LOC642852                                                   | 0.0009 | -1.28 | Normal down vs > 5 Years Off IS Tolerant |
| 235603_PM_at    | HNRNPU       | heterogeneous nuclear ribonucleoprotein U (scaffold attachment factor A) | 0.0009 | 1.73  | Normal up vs > 5 Years Off IS Tolerant   |
| 239225_PM_at    | ---          | ---                                                                      | 0.0009 | -1.51 | Normal down vs > 5 Years Off IS Tolerant |
| 211297_PM_s_at  | CDK7         | cyclin-dependent kinase 7                                                | 0.0009 | 1.72  | Normal up vs > 5 Years Off IS Tolerant   |
| 204453_PM_at    | ZNF84        | zinc finger protein 84                                                   | 0.0009 | 2.26  | Normal up vs > 5 Years Off IS Tolerant   |
| 214842_PM_s_at  | ---          | ---                                                                      | 0.0009 | -1.43 | Normal down vs > 5 Years Off IS Tolerant |
| 1562002_PM_at   | MYOZ3        | myozenin 3                                                               | 0.0009 | -1.40 | Normal down vs > 5 Years Off IS Tolerant |
| 218118_PM_s_at  | TIMM23       | translocase of inner mitochondrial membrane 23 homolog (yeast)           | 0.0009 | 1.75  | Normal up vs > 5 Years Off IS Tolerant   |
| 235086_PM_at    | THBS1        | thrombospondin 1                                                         | 0.0009 | 11.81 | Normal up vs > 5 Years Off IS Tolerant   |
| 237072_PM_at    | ---          | ---                                                                      | 0.0009 | -1.39 | Normal down vs > 5 Years Off IS Tolerant |
| 244135_PM_at    | ---          | ---                                                                      | 0.0009 | -1.33 | Normal down vs > 5 Years Off IS Tolerant |
| 203467_PM_at    | PMM1         | phosphomannomutase 1                                                     | 0.0009 | 1.60  | Normal up vs > 5 Years Off IS Tolerant   |
| 204278_PM_s_at  | EBAG9        | estrogen receptor binding site associated, antigen, 9                    | 0.0009 | 1.46  | Normal up vs > 5 Years Off IS Tolerant   |
| 1557119_PM_a_at | ZNF575       | zinc finger protein 575                                                  | 0.0009 | 1.44  | Normal up vs > 5 Years Off IS Tolerant   |
| 227796_PM_at    | ZFP62        | zinc finger protein 62 homolog (mouse)                                   | 0.0009 | 2.11  | Normal up vs > 5 Years Off IS Tolerant   |
| 230046_PM_at    | ---          | ---                                                                      | 0.0009 | -1.55 | Normal down vs > 5 Years Off IS Tolerant |
| 1561214_PM_at   | ---          | ---                                                                      | 0.0009 | -2.45 | Normal down vs > 5 Years Off IS Tolerant |



|                 |          |                                                             |        |       |                                          |
|-----------------|----------|-------------------------------------------------------------|--------|-------|------------------------------------------|
| 219212_PM_at    | HSPA14   | heat shock 70kDa protein 14                                 | 0.0009 | 1.53  | Normal up vs > 5 Years Off IS Tolerant   |
| 236932_PM_s_at  | GATAD2A  | GATA zinc finger domain containing 2A                       | 0.0009 | 1.27  | Normal up vs > 5 Years Off IS Tolerant   |
| 202134_PM_s_at  | WWTR1    | WW domain containing transcription regulator 1              | 0.0009 | -1.46 | Normal down vs > 5 Years Off IS Tolerant |
| 215141_PM_at    | C4orf10  | chromosome 4 open reading frame 10                          | 0.0009 | -1.39 | Normal down vs > 5 Years Off IS Tolerant |
| 225279_PM_s_at  | C3orf17  | chromosome 3 open reading frame 17                          | 0.0009 | 1.53  | Normal up vs > 5 Years Off IS Tolerant   |
| 218134_PM_s_at  | RBM22    | RNA binding motif protein 22                                | 0.0009 | 1.34  | Normal up vs > 5 Years Off IS Tolerant   |
| 202074_PM_s_at  | OPTN     | optineurin                                                  | 0.0009 | 2.10  | Normal up vs > 5 Years Off IS Tolerant   |
| 226465_PM_s_at  | SON      | SON DNA binding protein                                     | 0.0009 | 1.22  | Normal up vs > 5 Years Off IS Tolerant   |
| 224624_PM_at    | LRRC8A   | leucine rich repeat containing 8 family, member A           | 0.0009 | 1.56  | Normal up vs > 5 Years Off IS Tolerant   |
| 226272_PM_at    | RCAN3    | RCAN family member 3                                        | 0.0009 | 2.63  | Normal up vs > 5 Years Off IS Tolerant   |
| 222032_PM_s_at  | USP7     | ubiquitin specific peptidase 7 (herpes virus-associated)    | 0.0009 | 1.57  | Normal up vs > 5 Years Off IS Tolerant   |
| 240116_PM_at    | ---      | ---                                                         | 0.0009 | -1.55 | Normal down vs > 5 Years Off IS Tolerant |
| 1567101_PM_at   | ---      | ---                                                         | 0.0009 | -1.57 | Normal down vs > 5 Years Off IS Tolerant |
| 240849_PM_at    | ---      | ---                                                         | 0.0009 | -1.41 | Normal down vs > 5 Years Off IS Tolerant |
| 225376_PM_at    | C20orf11 | chromosome 20 open reading frame 11                         | 0.0009 | 1.48  | Normal up vs > 5 Years Off IS Tolerant   |
| 1564131_PM_a_at | ---      | ---                                                         | 0.0009 | -1.36 | Normal down vs > 5 Years Off IS Tolerant |
| 215293_PM_s_at  | PGAP2    | post-GPI attachment to proteins 2                           | 0.0009 | 1.51  | Normal up vs > 5 Years Off IS Tolerant   |
| 235125_PM_x_at  | FAM73A   | family with sequence similarity 73, member A                | 0.0009 | 1.96  | Normal up vs > 5 Years Off IS Tolerant   |
| 210653_PM_s_at  | BCKDHB   | branched chain keto acid dehydrogenase E1, beta polypeptide | 0.0009 | 1.90  | Normal up vs > 5 Years Off IS Tolerant   |
| 205255_PM_x_at  | TCF7     | transcription factor 7 (T-cell specific, HMG-box)           | 0.0009 | 1.93  | Normal up vs > 5 Years Off IS Tolerant   |
| 236293_PM_at    | RHOH     | ras homolog gene family, member H                           | 0.0009 | 2.08  | Normal up vs > 5 Years Off IS Tolerant   |
| 1553549_PM_at   | VN1R2    | vomeronasal 1 receptor 2                                    | 0.0009 | -1.41 | Normal down vs > 5 Years Off IS Tolerant |
| 207835_PM_at    | FBLN1    | fibulin 1                                                   | 0.0009 | -3.09 | Normal down vs > 5 Years Off IS Tolerant |
| 228627_PM_at    | TLK2     | tousled-like kinase 2                                       | 0.0009 | 1.52  | Normal up vs > 5 Years Off IS Tolerant   |
| 241921_PM_x_at  | ---      | ---                                                         | 0.0009 | -1.52 | Normal down vs > 5 Years Off IS Tolerant |
| 233167_PM_at    | SELO     | selenoprotein O                                             | 0.0009 | 2.21  | Normal up vs > 5 Years Off IS Tolerant   |
| 223294_PM_at    | CXorf26  | chromosome X open reading frame 26                          | 0.0009 | 1.52  | Normal up vs > 5 Years Off IS Tolerant   |

|                 |              |                                                                               |        |       |                                          |
|-----------------|--------------|-------------------------------------------------------------------------------|--------|-------|------------------------------------------|
| 213901_PM_x_at  | RBFOX2       | RNA binding protein, fox-1 homolog (C. elegans) 2                             | 0.0009 | -1.37 | Normal down vs > 5 Years Off IS Tolerant |
| 1556323_PM_at   | CELF2        | CUGBP, Elav-like family member 2                                              | 0.0009 | 1.69  | Normal up vs > 5 Years Off IS Tolerant   |
| 1568768_PM_s_at | LOC100302650 | hypothetical LOC100302650                                                     | 0.0010 | 3.72  | Normal up vs > 5 Years Off IS Tolerant   |
| 223189_PM_x_at  | MLL5         | myeloid/lymphoid or mixed-lineage leukemia 5 (trithorax homolog, Drosophila)  | 0.0010 | 1.29  | Normal up vs > 5 Years Off IS Tolerant   |
| 1560109_PM_s_at | ---          | ---                                                                           | 0.0010 | -1.55 | Normal down vs > 5 Years Off IS Tolerant |
| 229420_PM_at    | ---          | ---                                                                           | 0.0010 | -2.07 | Normal down vs > 5 Years Off IS Tolerant |
| 1561960_PM_at   | CSPG4P5      | chondroitin sulfate proteoglycan 4 pseudogene 5                               | 0.0010 | -1.39 | Normal down vs > 5 Years Off IS Tolerant |
| 216246_PM_at    | ---          | ---                                                                           | 0.0010 | -2.45 | Normal down vs > 5 Years Off IS Tolerant |
| 203969_PM_at    | PEX3         | peroxisomal biogenesis factor 3                                               | 0.0010 | 1.56  | Normal up vs > 5 Years Off IS Tolerant   |
| 221553_PM_at    | MAGT1        | magnesium transporter 1                                                       | 0.0010 | 1.60  | Normal up vs > 5 Years Off IS Tolerant   |
| 239945_PM_at    | ---          | ---                                                                           | 0.0010 | -1.84 | Normal down vs > 5 Years Off IS Tolerant |
| 205250_PM_s_at  | CEP290       | centrosomal protein 290kDa                                                    | 0.0010 | 1.49  | Normal up vs > 5 Years Off IS Tolerant   |
| 218114_PM_at    | GGA1         | golgi-associated, gamma adaptin ear containing, ARF binding protein 1         | 0.0010 | 1.47  | Normal up vs > 5 Years Off IS Tolerant   |
| 208433_PM_s_at  | LRP8         | low density lipoprotein receptor-related protein 8, apolipoprotein e receptor | 0.0010 | 1.63  | Normal up vs > 5 Years Off IS Tolerant   |
| 1563853_PM_at   | LOC283045    | hypothetical protein LOC283045                                                | 0.0010 | -2.23 | Normal down vs > 5 Years Off IS Tolerant |
| 216837_PM_at    | EPHA5        | EPH receptor A5                                                               | 0.0010 | -2.09 | Normal down vs > 5 Years Off IS Tolerant |
| 206017_PM_at    | KIAA0319     | KIAA0319                                                                      | 0.0010 | -1.38 | Normal down vs > 5 Years Off IS Tolerant |
| 233820_PM_at    | ---          | ---                                                                           | 0.0010 | -1.34 | Normal down vs > 5 Years Off IS Tolerant |
| 220212_PM_s_at  | THADA        | thyroid adenoma associated                                                    | 0.0010 | 1.56  | Normal up vs > 5 Years Off IS Tolerant   |
| 1570315_PM_at   | HTA          | hypothetical LOC283902                                                        | 0.0010 | -1.71 | Normal down vs > 5 Years Off IS Tolerant |
| 1560151_PM_x_at | SLC29A2      | solute carrier family 29 (nucleoside transporters), member 2                  | 0.0010 | -1.41 | Normal down vs > 5 Years Off IS Tolerant |
| 1563033_PM_x_at | ---          | ---                                                                           | 0.0010 | -1.31 | Normal down vs > 5 Years Off IS Tolerant |
| 234485_PM_at    | EIF3L        | eukaryotic translation initiation factor 3, subunit L                         | 0.0010 | 1.57  | Normal up vs > 5 Years Off IS Tolerant   |

|                 |              |                                                       |        |       |                                          |
|-----------------|--------------|-------------------------------------------------------|--------|-------|------------------------------------------|
| 213024_PM_at    | TMF1         | TATA element modulatory factor 1                      | 0.0010 | 2.16  | Normal up vs > 5 Years Off IS Tolerant   |
| 212061_PM_at    | SR140        | U2-associated SR140 protein                           | 0.0010 | 1.45  | Normal up vs > 5 Years Off IS Tolerant   |
| 232001_PM_at    | LOC439949    | hypothetical LOC439949                                | 0.0010 | 3.23  | Normal up vs > 5 Years Off IS Tolerant   |
| 220531_PM_at    | ---          | ---                                                   | 0.0010 | -1.40 | Normal down vs > 5 Years Off IS Tolerant |
| 239302_PM_s_at  | LOC100506922 | hypothetical LOC100506922                             | 0.0010 | 2.04  | Normal up vs > 5 Years Off IS Tolerant   |
| 206678_PM_at    | GABRA1       | gamma-aminobutyric acid (GABA) A receptor, alpha 1    | 0.0010 | -1.88 | Normal down vs > 5 Years Off IS Tolerant |
| 229072_PM_at    | ---          | ---                                                   | 0.0010 | 2.96  | Normal up vs > 5 Years Off IS Tolerant   |
| 220643_PM_s_at  | FAIM         | Fas apoptotic inhibitory molecule                     | 0.0010 | 1.60  | Normal up vs > 5 Years Off IS Tolerant   |
| 239442_PM_at    | CEP68        | centrosomal protein 68kDa                             | 0.0010 | 2.08  | Normal up vs > 5 Years Off IS Tolerant   |
| 227119_PM_at    | CNOT6L       | CCR4-NOT transcription complex, subunit 6-like        | 0.0010 | 1.87  | Normal up vs > 5 Years Off IS Tolerant   |
| 242262_PM_x_at  | ---          | ---                                                   | 0.0010 | -1.30 | Normal down vs > 5 Years Off IS Tolerant |
| 33304_PM_at     | ISG20        | interferon stimulated exonuclease gene 20kDa          | 0.0010 | 1.77  | Normal up vs > 5 Years Off IS Tolerant   |
| 202505_PM_at    | SNRPB2       | small nuclear ribonucleoprotein polypeptide B         | 0.0010 | 1.36  | Normal up vs > 5 Years Off IS Tolerant   |
| 210635_PM_s_at  | KLHL20       | kelch-like 20 (Drosophila)                            | 0.0010 | 1.78  | Normal up vs > 5 Years Off IS Tolerant   |
| 1552672_PM_a_at | IGSF3        | immunoglobulin superfamily, member 3                  | 0.0010 | -1.33 | Normal down vs > 5 Years Off IS Tolerant |
| 223325_PM_at    | TXNDC11      | thioredoxin domain containing 11                      | 0.0010 | 1.94  | Normal up vs > 5 Years Off IS Tolerant   |
| 211543_PM_s_at  | GRK6         | G protein-coupled receptor kinase 6                   | 0.0010 | 1.67  | Normal up vs > 5 Years Off IS Tolerant   |
| 215616_PM_s_at  | KDM4B        | lysine (K)-specific demethylase 4B                    | 0.0010 | -1.45 | Normal down vs > 5 Years Off IS Tolerant |
| 233645_PM_s_at  | C1RL         | complement component 1, r subcomponent-like           | 0.0010 | -1.33 | Normal down vs > 5 Years Off IS Tolerant |
| 1563721_PM_at   | ---          | ---                                                   | 0.0010 | -1.44 | Normal down vs > 5 Years Off IS Tolerant |
| 222390_PM_at    | WAC          | WW domain containing adaptor with coiled-coil         | 0.0010 | 1.15  | Normal up vs > 5 Years Off IS Tolerant   |
| 231782_PM_s_at  | KLK4         | kallikrein-related peptidase 4                        | 0.0010 | -1.36 | Normal down vs > 5 Years Off IS Tolerant |
| 210607_PM_at    | FLT3LG       | fms-related tyrosine kinase 3 ligand                  | 0.0010 | 2.32  | Normal up vs > 5 Years Off IS Tolerant   |
| 210283_PM_x_at  | PAIP1        | poly(A) binding protein interacting protein 1         | 0.0010 | 2.35  | Normal up vs > 5 Years Off IS Tolerant   |
| 223080_PM_at    | GLS          | Glutaminase                                           | 0.0010 | 1.99  | Normal up vs > 5 Years Off IS Tolerant   |
| 229608_PM_at    | C1orf183     | chromosome 1 open reading frame 183                   | 0.0010 | -1.43 | Normal down vs > 5 Years Off IS Tolerant |
| 204788_PM_s_at  | PPOX         | protoporphyrinogen oxidase                            | 0.0010 | 1.59  | Normal up vs > 5 Years Off IS Tolerant   |
| 244755_PM_at    | ---          | ---                                                   | 0.0010 | 1.51  | Normal up vs > 5 Years Off IS Tolerant   |
| 204995_PM_at    | CDK5R1       | cyclin-dependent kinase 5, regulatory subunit 1 (p35) | 0.0010 | 2.55  | Normal up vs > 5 Years Off IS Tolerant   |
| 222026_PM_at    | RBM3         | RNA binding motif (RNP1, RRM) protein 3               | 0.0010 | 1.94  | Normal up vs > 5 Years Off IS Tolerant   |

|                 |           |                                                              |        |       |                                          |
|-----------------|-----------|--------------------------------------------------------------|--------|-------|------------------------------------------|
| 225295_PM_at    | SLC39A10  | solute carrier family 39 (zinc transporter), member 10       | 0.0010 | 1.65  | Normal up vs > 5 Years Off IS Tolerant   |
| 1563396_PM_x_at | ---       | ---                                                          | 0.0010 | -1.34 | Normal down vs > 5 Years Off IS Tolerant |
| 1567140_PM_at   | ---       | ---                                                          | 0.0010 | -1.35 | Normal down vs > 5 Years Off IS Tolerant |
| 225865_PM_x_at  | TH1L      | TH1-like (Drosophila)                                        | 0.0010 | 1.45  | Normal up vs > 5 Years Off IS Tolerant   |
| 1561292_PM_at   | ---       | ---                                                          | 0.0010 | -1.39 | Normal down vs > 5 Years Off IS Tolerant |
| 1553016_PM_at   | GPR113    | G protein-coupled receptor 113                               | 0.0010 | -1.64 | Normal down vs > 5 Years Off IS Tolerant |
| 232005_PM_at    | DNAH1     | dynein, axonemal, heavy chain 1                              | 0.0010 | 1.49  | Normal up vs > 5 Years Off IS Tolerant   |
| 222422_PM_s_at  | NDFIP1    | Nedd4 family interacting protein 1                           | 0.0010 | 1.65  | Normal up vs > 5 Years Off IS Tolerant   |
| 220596_PM_at    | GPATCH4   | G patch domain containing 4                                  | 0.0010 | -1.43 | Normal down vs > 5 Years Off IS Tolerant |
| 201580_PM_s_at  | TMX4      | thioredoxin-related transmembrane protein 4                  | 0.0010 | 1.73  | Normal up vs > 5 Years Off IS Tolerant   |
| 204777_PM_s_at  | MAL       | mal, T-cell differentiation protein                          | 0.0010 | 4.22  | Normal up vs > 5 Years Off IS Tolerant   |
| 1569287_PM_at   | ---       | ---                                                          | 0.0010 | -1.27 | Normal down vs > 5 Years Off IS Tolerant |
| 244462_PM_at    | ZNF224    | zinc finger protein 224                                      | 0.0010 | 1.76  | Normal up vs > 5 Years Off IS Tolerant   |
| 1554252_PM_a_at | LASS3     | LAG1 homolog, ceramide synthase 3                            | 0.0010 | -2.06 | Normal down vs > 5 Years Off IS Tolerant |
| 219220_PM_x_at  | MRPS22    | mitochondrial ribosomal protein S22                          | 0.0010 | 1.49  | Normal up vs > 5 Years Off IS Tolerant   |
| 241077_PM_at    | ---       | ---                                                          | 0.0010 | -2.42 | Normal down vs > 5 Years Off IS Tolerant |
| 216179_PM_x_at  | ---       | ---                                                          | 0.0010 | -1.32 | Normal down vs > 5 Years Off IS Tolerant |
| 216011_PM_at    | SLC39A9   | Solute carrier family 39 (zinc transporter), member 9        | 0.0010 | -1.62 | Normal down vs > 5 Years Off IS Tolerant |
| 219526_PM_at    | C14orf169 | chromosome 14 open reading frame 169                         | 0.0010 | 1.66  | Normal up vs > 5 Years Off IS Tolerant   |
| 234766_PM_at    | OR8D2     | olfactory receptor, family 8, subfamily D, member 2          | 0.0010 | -1.26 | Normal down vs > 5 Years Off IS Tolerant |
| 214028_PM_x_at  | TDRD3     | tudor domain containing 3                                    | 0.0010 | 1.44  | Normal up vs > 5 Years Off IS Tolerant   |
| 241654_PM_at    | ---       | ---                                                          | 0.0010 | -3.49 | Normal down vs > 5 Years Off IS Tolerant |
| 211969_PM_at    | HSP90AA1  | heat shock protein 90kDa alpha (cytosolic), class A member 1 | 0.0010 | 1.22  | Normal up vs > 5 Years Off IS Tolerant   |
| 237628_PM_at    | ---       | ---                                                          | 0.0010 | -1.75 | Normal down vs > 5 Years Off IS Tolerant |

|                |           |                                                                              |        |       |                                          |
|----------------|-----------|------------------------------------------------------------------------------|--------|-------|------------------------------------------|
| 207405_PM_s_at | RAD17     | RAD17 homolog (S. pombe)                                                     | 0.0010 | 1.64  | Normal up vs > 5 Years Off IS Tolerant   |
| 209810_PM_at   | SFTPB     | surfactant protein B                                                         | 0.0010 | -1.31 | Normal down vs > 5 Years Off IS Tolerant |
| 204742_PM_s_at | PDS5B     | PDS5, regulator of cohesion maintenance, homolog B (S. cerevisiae)           | 0.0010 | 1.73  | Normal up vs > 5 Years Off IS Tolerant   |
| 231506_PM_at   | ---       | ---                                                                          | 0.0010 | -1.29 | Normal down vs > 5 Years Off IS Tolerant |
| 215717_PM_s_at | FBN2      | fibrillin 2                                                                  | 0.0010 | -1.44 | Normal down vs > 5 Years Off IS Tolerant |
| 212183_PM_at   | NUDT4     | nudix (nucleoside diphosphate linked moiety X)-type motif 4                  | 0.0010 | 2.67  | Normal up vs > 5 Years Off IS Tolerant   |
| 244402_PM_at   | ---       | ---                                                                          | 0.0010 | -1.39 | Normal down vs > 5 Years Off IS Tolerant |
| 218667_PM_at   | PJA1      | praja ring finger 1                                                          | 0.0010 | 1.53  | Normal up vs > 5 Years Off IS Tolerant   |
| 1553837_PM_at  | PGAM5     | phosphoglycerate mutase family member 5                                      | 0.0010 | -1.41 | Normal down vs > 5 Years Off IS Tolerant |
| 203319_PM_s_at | ZNF148    | zinc finger protein 148                                                      | 0.0010 | 1.62  | Normal up vs > 5 Years Off IS Tolerant   |
| 234969_PM_s_at | EPC1      | enhancer of polycomb homolog 1 (Drosophila)                                  | 0.0010 | 1.34  | Normal up vs > 5 Years Off IS Tolerant   |
| 209757_PM_s_at | MYCN      | v-myc myelocytomatosis viral related oncogene, neuroblastoma derived (avian) | 0.0010 | -1.36 | Normal down vs > 5 Years Off IS Tolerant |
| 1562891_PM_at  | ---       | ---                                                                          | 0.0010 | -1.63 | Normal down vs > 5 Years Off IS Tolerant |
| 212672_PM_at   | ATM       | ataxia telangiectasia mutated                                                | 0.0010 | 1.81  | Normal up vs > 5 Years Off IS Tolerant   |
| 235473_PM_at   | MED6      | Mediator complex subunit 6                                                   | 0.0010 | 1.87  | Normal up vs > 5 Years Off IS Tolerant   |
| 1564803_PM_at  | KRTAP11-1 | keratin associated protein 11-1                                              | 0.0010 | -1.49 | Normal down vs > 5 Years Off IS Tolerant |
| 204743_PM_at   | TAGLN3    | transgelin 3                                                                 | 0.0010 | -1.41 | Normal down vs > 5 Years Off IS Tolerant |
| 218343_PM_s_at | GTF3C3    | general transcription factor IIIC, polypeptide 3, 102kDa                     | 0.0010 | 1.40  | Normal up vs > 5 Years Off IS Tolerant   |
| 204890_PM_s_at | LCK       | lymphocyte-specific protein tyrosine kinase                                  | 0.0010 | 2.61  | Normal up vs > 5 Years Off IS Tolerant   |
| 214439_PM_x_at | BIN1      | bridging integrator 1                                                        | 0.0010 | 1.98  | Normal up vs > 5 Years Off IS Tolerant   |
| 224696_PM_s_at | DCAF5     | DDB1 and CUL4 associated factor 5                                            | 0.0010 | 1.58  | Normal up vs > 5 Years Off IS Tolerant   |
| 236148_PM_at   | ---       | ---                                                                          | 0.0010 | -1.27 | Normal down vs > 5 Years Off IS Tolerant |
| 204562_PM_at   | IRF4      | interferon regulatory factor 4                                               | 0.0010 | 1.96  | Normal up vs > 5 Years Off IS Tolerant   |
| 210253_PM_at   | HTATIP2   | HIV-1 Tat interactive protein 2, 30kDa                                       | 0.0010 | 1.79  | Normal up vs > 5 Years Off IS Tolerant   |
| 210825_PM_s_at | PEBP1     | phosphatidylethanolamine binding protein 1                                   | 0.0010 | 1.45  | Normal up vs > 5 Years Off IS Tolerant   |

|                 |                                                                                            |                                                                                           |        |       |                                          |
|-----------------|--------------------------------------------------------------------------------------------|-------------------------------------------------------------------------------------------|--------|-------|------------------------------------------|
| 1567912_PM_s_at | CT45A1 /// CT45A2<br>/// CT45A3 ///<br>CT45A4 /// CT45A5<br>/// CT45A6 ///<br>LOC100133581 | cancer/testis antigen family 45, member A1 ///<br>cancer/testis antigen family 45, member | 0.0010 | -1.55 | Normal down vs > 5 Years Off IS Tolerant |
| 230403_PM_at    | RFX3                                                                                       | regulatory factor X, 3 (influences HLA class II expression)                               | 0.0010 | 2.06  | Normal up vs > 5 Years Off IS Tolerant   |
| 236538_PM_at    | GRIA2                                                                                      | glutamate receptor, ionotropic, AMPA 2                                                    | 0.0010 | -1.40 | Normal down vs > 5 Years Off IS Tolerant |
| 210983_PM_s_at  | MCM7                                                                                       | minichromosome maintenance complex component 7                                            | 0.0010 | 1.85  | Normal up vs > 5 Years Off IS Tolerant   |
| 210097_PM_s_at  | NOL7                                                                                       | nucleolar protein 7, 27kDa                                                                | 0.0010 | 1.34  | Normal up vs > 5 Years Off IS Tolerant   |
| 230082_PM_at    | LOC100133660                                                                               | Hypothetical LOC100133660                                                                 | 0.0010 | 2.46  | Normal up vs > 5 Years Off IS Tolerant   |
| 208806_PM_at    | CHD3                                                                                       | chromodomain helicase DNA binding protein 3                                               | 0.0010 | 1.61  | Normal up vs > 5 Years Off IS Tolerant   |
| 234203_PM_at    | ---                                                                                        | ---                                                                                       | 0.0010 | -1.33 | Normal down vs > 5 Years Off IS Tolerant |
| 207201_PM_s_at  | SLC22A1                                                                                    | solute carrier family 22 (organic cation transporter),<br>member 1                        | 0.0010 | -1.29 | Normal down vs > 5 Years Off IS Tolerant |
| 211285_PM_s_at  | UBE3A                                                                                      | ubiquitin protein ligase E3A                                                              | 0.0010 | 1.25  | Normal up vs > 5 Years Off IS Tolerant   |
| 1557185_PM_at   | TPCN1                                                                                      | two pore segment channel 1                                                                | 0.0010 | -1.39 | Normal down vs > 5 Years Off IS Tolerant |
| 203657_PM_s_at  | CTSF                                                                                       | cathepsin F                                                                               | 0.0010 | 1.42  | Normal up vs > 5 Years Off IS Tolerant   |
| 1553547_PM_at   | ---                                                                                        | ---                                                                                       | 0.0010 | -1.44 | Normal down vs > 5 Years Off IS Tolerant |
| 236754_PM_at    | PPP1R2                                                                                     | protein phosphatase 1, regulatory (inhibitor) subunit 2                                   | 0.0010 | 1.64  | Normal up vs > 5 Years Off IS Tolerant   |
| 202478_PM_at    | TRIB2                                                                                      | tribbles homolog 2 (Drosophila)                                                           | 0.0010 | 1.97  | Normal up vs > 5 Years Off IS Tolerant   |
| 217773_PM_s_at  | NDUFA4                                                                                     | NADH dehydrogenase (ubiquinone) 1 alpha<br>subcomplex, 4, 9kDa                            | 0.0010 | 1.33  | Normal up vs > 5 Years Off IS Tolerant   |
| 232171_PM_x_at  | KLHDC4                                                                                     | kelch domain containing 4                                                                 | 0.0010 | 2.15  | Normal up vs > 5 Years Off IS Tolerant   |
| 206051_PM_at    | ELAVL4                                                                                     | ELAV (embryonic lethal, abnormal vision, Drosophila)-<br>like 4 (Hu antigen D)            | 0.0010 | -1.54 | Normal down vs > 5 Years Off IS Tolerant |
| 224964_PM_s_at  | GNG2                                                                                       | guanine nucleotide binding protein (G protein), gamma<br>2                                | 0.0010 | 1.40  | Normal up vs > 5 Years Off IS Tolerant   |
| 1555189_PM_a_at | TAT                                                                                        | tyrosine aminotransferase                                                                 | 0.0010 | -1.97 | Normal down vs > 5 Years Off IS Tolerant |
| 207983_PM_s_at  | STAG2                                                                                      | stromal antigen 2                                                                         | 0.0010 | 1.39  | Normal up vs > 5 Years Off IS Tolerant   |

|                |          |                                                                  |        |       |                                          |
|----------------|----------|------------------------------------------------------------------|--------|-------|------------------------------------------|
| 217273_PM_at   | PRAMEF10 | PRAME family member 10                                           | 0.0011 | -1.30 | Normal down vs > 5 Years Off IS Tolerant |
| 202191_PM_s_at | GAS7     | growth arrest-specific 7                                         | 0.0011 | -1.53 | Normal down vs > 5 Years Off IS Tolerant |
| 204436_PM_at   | PLEKHO2  | pleckstrin homology domain containing, family O member 2         | 0.0011 | -1.52 | Normal down vs > 5 Years Off IS Tolerant |
| 209648_PM_x_at | SOCS5    | suppressor of cytokine signaling 5                               | 0.0011 | 1.85  | Normal up vs > 5 Years Off IS Tolerant   |
| 1554665_PM_at  | ZNF586   | zinc finger protein 586                                          | 0.0011 | -1.52 | Normal down vs > 5 Years Off IS Tolerant |
| 218405_PM_at   | ABT1     | activator of basal transcription 1                               | 0.0011 | 1.56  | Normal up vs > 5 Years Off IS Tolerant   |
| 204988_PM_at   | FGB      | fibrinogen beta chain                                            | 0.0011 | -1.44 | Normal down vs > 5 Years Off IS Tolerant |
| 243731_PM_at   | ---      | ---                                                              | 0.0011 | -1.64 | Normal down vs > 5 Years Off IS Tolerant |
| 209974_PM_s_at | BUB3     | budding uninhibited by benzimidazoles 3 homolog (yeast)          | 0.0011 | 1.64  | Normal up vs > 5 Years Off IS Tolerant   |
| 1554303_PM_at  | HNMT     | histamine N-methyltransferase                                    | 0.0011 | -1.36 | Normal down vs > 5 Years Off IS Tolerant |
| 221558_PM_s_at | LEF1     | lymphoid enhancer-binding factor 1                               | 0.0011 | 3.23  | Normal up vs > 5 Years Off IS Tolerant   |
| 203468_PM_at   | CDK10    | cyclin-dependent kinase 10                                       | 0.0011 | 1.69  | Normal up vs > 5 Years Off IS Tolerant   |
| 203129_PM_s_at | KIF5C    | kinesin family member 5C                                         | 0.0011 | 1.78  | Normal up vs > 5 Years Off IS Tolerant   |
| 221506_PM_s_at | TNPO2    | transportin 2                                                    | 0.0011 | 1.37  | Normal up vs > 5 Years Off IS Tolerant   |
| 1569401_PM_at  | CLEC12A  | C-type lectin domain family 12, member A                         | 0.0011 | -2.84 | Normal down vs > 5 Years Off IS Tolerant |
| 1561909_PM_at  | ---      | ---                                                              | 0.0011 | -1.63 | Normal down vs > 5 Years Off IS Tolerant |
| 208723_PM_at   | USP11    | ubiquitin specific peptidase 11                                  | 0.0011 | 1.48  | Normal up vs > 5 Years Off IS Tolerant   |
| 210024_PM_s_at | UBE2E3   | ubiquitin-conjugating enzyme E2E 3 (UBC4/5 homolog, yeast)       | 0.0011 | 1.30  | Normal up vs > 5 Years Off IS Tolerant   |
| 221548_PM_s_at | ILKAP    | integrin-linked kinase-associated serine/threonine phosphatase   | 0.0011 | 1.51  | Normal up vs > 5 Years Off IS Tolerant   |
| 209862_PM_s_at | CEP57    | centrosomal protein 57kDa                                        | 0.0011 | 1.49  | Normal up vs > 5 Years Off IS Tolerant   |
| 1561271_PM_at  | CCDC144C | coiled-coil domain containing 144C                               | 0.0011 | -2.79 | Normal down vs > 5 Years Off IS Tolerant |
| 235568_PM_at   | C19orf59 | chromosome 19 open reading frame 59                              | 0.0011 | -2.60 | Normal down vs > 5 Years Off IS Tolerant |
| 238704_PM_at   | ---      | ---                                                              | 0.0011 | 1.67  | Normal up vs > 5 Years Off IS Tolerant   |
| 232774_PM_x_at | ZIK1     | zinc finger protein interacting with K protein 1 homolog (mouse) | 0.0011 | 1.42  | Normal up vs > 5 Years Off IS Tolerant   |

|                 |              |                                                                                             |        |       |                                          |
|-----------------|--------------|---------------------------------------------------------------------------------------------|--------|-------|------------------------------------------|
| 201422_PM_at    | IFI30        | interferon, gamma-inducible protein 30                                                      | 0.0011 | -1.40 | Normal down vs > 5 Years Off IS Tolerant |
| 206073_PM_at    | COLQ         | collagen-like tail subunit (single strand of homotrimer) of asymmetric acetylcholinesterase | 0.0011 | 1.83  | Normal up vs > 5 Years Off IS Tolerant   |
| 234647_PM_at    | KCNIP3       | Kv channel interacting protein 3, calsenilin                                                | 0.0011 | -1.53 | Normal down vs > 5 Years Off IS Tolerant |
| 207170_PM_s_at  | LETMD1       | LETM1 domain containing 1                                                                   | 0.0011 | 1.53  | Normal up vs > 5 Years Off IS Tolerant   |
| 212176_PM_at    | SFRS18       | splicing factor, arginine/serine-rich 18                                                    | 0.0011 | 1.34  | Normal up vs > 5 Years Off IS Tolerant   |
| 233840_PM_at    | LOC100130950 | hypothetical LOC100130950                                                                   | 0.0011 | -1.30 | Normal down vs > 5 Years Off IS Tolerant |
| 200093_PM_s_at  | HINT1        | histidine triad nucleotide binding protein 1                                                | 0.0011 | 1.49  | Normal up vs > 5 Years Off IS Tolerant   |
| 204593_PM_s_at  | SMCR7L       | Smith-Magenis syndrome chromosome region, candidate 7-like                                  | 0.0011 | 1.88  | Normal up vs > 5 Years Off IS Tolerant   |
| 228976_PM_at    | ICOSLG       | inducible T-cell co-stimulator ligand                                                       | 0.0011 | 2.56  | Normal up vs > 5 Years Off IS Tolerant   |
| 1558411_PM_at   | EGFEM1P      | EGF-like and EMI domain containing 1, pseudogene                                            | 0.0011 | -1.59 | Normal down vs > 5 Years Off IS Tolerant |
| 212222_PM_at    | PSME4        | proteasome (prosome, macropain) activator subunit 4                                         | 0.0011 | 1.56  | Normal up vs > 5 Years Off IS Tolerant   |
| 1563970_PM_at   | LOC100130998 | hypothetical protein LOC100130998                                                           | 0.0011 | -1.60 | Normal down vs > 5 Years Off IS Tolerant |
| 216197_PM_at    | ATF7IP       | activating transcription factor 7 interacting protein                                       | 0.0011 | 2.03  | Normal up vs > 5 Years Off IS Tolerant   |
| 227910_PM_at    | XPNPEP3      | X-prolyl aminopeptidase (aminopeptidase P) 3, putative                                      | 0.0011 | 1.96  | Normal up vs > 5 Years Off IS Tolerant   |
| 200833_PM_s_at  | RAP1B        | RAP1B, member of RAS oncogene family                                                        | 0.0011 | 1.22  | Normal up vs > 5 Years Off IS Tolerant   |
| 224218_PM_s_at  | TRPS1        | trichorhinophalangeal syndrome I                                                            | 0.0011 | -1.96 | Normal down vs > 5 Years Off IS Tolerant |
| 225816_PM_at    | PHF17        | PHD finger protein 17                                                                       | 0.0011 | 1.66  | Normal up vs > 5 Years Off IS Tolerant   |
| 235782_PM_at    | ---          | ---                                                                                         | 0.0011 | 2.04  | Normal up vs > 5 Years Off IS Tolerant   |
| 228572_PM_at    | LOC100507168 | hypothetical LOC100507168                                                                   | 0.0011 | -1.65 | Normal down vs > 5 Years Off IS Tolerant |
| 227408_PM_s_at  | SNX25        | sorting nexin 25                                                                            | 0.0011 | 1.58  | Normal up vs > 5 Years Off IS Tolerant   |
| 1553872_PM_at   | C17orf103    | chromosome 17 open reading frame 103                                                        | 0.0011 | -1.52 | Normal down vs > 5 Years Off IS Tolerant |
| 1557240_PM_a_at | ---          | ---                                                                                         | 0.0011 | 2.03  | Normal up vs > 5 Years Off IS Tolerant   |
| 217144_PM_at    | UBB          | ubiquitin B                                                                                 | 0.0011 | 2.14  | Normal up vs > 5 Years Off IS Tolerant   |
| 238446_PM_at    | GUSBP3       | Glucuronidase, beta pseudogene 3                                                            | 0.0011 | -2.22 | Normal down vs > 5 Years Off IS Tolerant |
| 205257_PM_s_at  | AMPH         | amphiphysin                                                                                 | 0.0011 | -1.57 | Normal down vs > 5 Years Off IS Tolerant |



|                 |              |                                                                                         |        |       |                                          |
|-----------------|--------------|-----------------------------------------------------------------------------------------|--------|-------|------------------------------------------|
| 218841_PM_at    | ASB8         | ankyrin repeat and SOCS box-containing 8                                                | 0.0011 | 1.66  | Normal up vs > 5 Years Off IS Tolerant   |
| 1555155_PM_at   | MLLT6        | myeloid/lymphoid or mixed-lineage leukemia (trithorax homolog, Drosophila); translocate | 0.0011 | -1.39 | Normal down vs > 5 Years Off IS Tolerant |
| 201174_PM_s_at  | TERF2IP      | telomeric repeat binding factor 2, interacting protein                                  | 0.0011 | 1.49  | Normal up vs > 5 Years Off IS Tolerant   |
| 240017_PM_at    | LOC400960    | Hypothetical gene supported by BC040598                                                 | 0.0011 | -1.35 | Normal down vs > 5 Years Off IS Tolerant |
| 219870_PM_at    | ATF7IP2      | activating transcription factor 7 interacting protein 2                                 | 0.0011 | 1.80  | Normal up vs > 5 Years Off IS Tolerant   |
| 212751_PM_at    | UBE2N        | ubiquitin-conjugating enzyme E2N (UBC13 homolog, yeast)                                 | 0.0011 | 1.55  | Normal up vs > 5 Years Off IS Tolerant   |
| 1570257_PM_x_at | ---          | ---                                                                                     | 0.0011 | -1.50 | Normal down vs > 5 Years Off IS Tolerant |
| 1558496_PM_at   | ---          | ---                                                                                     | 0.0011 | -2.09 | Normal down vs > 5 Years Off IS Tolerant |
| 1569591_PM_at   | F11          | coagulation factor XI                                                                   | 0.0011 | -1.27 | Normal down vs > 5 Years Off IS Tolerant |
| 243609_PM_at    | CYP3A7       | cytochrome P450, family 3, subfamily A, polypeptide 7                                   | 0.0011 | -1.91 | Normal down vs > 5 Years Off IS Tolerant |
| 240728_PM_at    | PLCB4        | Phospholipase C, beta 4                                                                 | 0.0011 | -1.75 | Normal down vs > 5 Years Off IS Tolerant |
| 225762_PM_x_at  | LOC284801    | hypothetical protein LOC284801                                                          | 0.0011 | 1.77  | Normal up vs > 5 Years Off IS Tolerant   |
| 1564274_PM_at   | C9orf47      | chromosome 9 open reading frame 47                                                      | 0.0011 | -1.78 | Normal down vs > 5 Years Off IS Tolerant |
| 244150_PM_at    | ---          | ---                                                                                     | 0.0011 | 1.38  | Normal up vs > 5 Years Off IS Tolerant   |
| 1569157_PM_s_at | ZNF846       | zinc finger protein 846                                                                 | 0.0011 | 2.03  | Normal up vs > 5 Years Off IS Tolerant   |
| 205897_PM_at    | NFATC4       | nuclear factor of activated T-cells, cytoplasmic, calcineurin-dependent 4               | 0.0011 | -1.38 | Normal down vs > 5 Years Off IS Tolerant |
| 215186_PM_at    | TBC1D30      | TBC1 domain family, member 30                                                           | 0.0011 | -1.62 | Normal down vs > 5 Years Off IS Tolerant |
| 235698_PM_at    | ZFP90        | zinc finger protein 90 homolog (mouse)                                                  | 0.0011 | 2.32  | Normal up vs > 5 Years Off IS Tolerant   |
| 242807_PM_at    | FSD1L        | fibronectin type III and SPRY domain containing 1-like                                  | 0.0011 | -2.05 | Normal down vs > 5 Years Off IS Tolerant |
| 236323_PM_at    | LOC100506555 | hypothetical LOC100506555                                                               | 0.0011 | -1.58 | Normal down vs > 5 Years Off IS Tolerant |
| 225499_PM_at    | RALGAPA2     | Ral GTPase activating protein, alpha subunit 2 (catalytic)                              | 0.0011 | 1.56  | Normal up vs > 5 Years Off IS Tolerant   |
| 244122_PM_at    | MGST3        | Microsomal glutathione S-transferase 3                                                  | 0.0011 | -1.45 | Normal down vs > 5 Years Off IS Tolerant |
| 205703_PM_at    | ATP6V0A2     | ATPase, H+ transporting, lysosomal V0 subunit a2                                        | 0.0011 | -1.31 | Normal down vs > 5 Years Off IS Tolerant |

|                |           |                                                                         |        |       |                                          |
|----------------|-----------|-------------------------------------------------------------------------|--------|-------|------------------------------------------|
| 202610_PM_s_at | MED14     | mediator complex subunit 14                                             | 0.0011 | 1.59  | Normal up vs > 5 Years Off IS Tolerant   |
| 237882_PM_at   | ---       | ---                                                                     | 0.0011 | -1.47 | Normal down vs > 5 Years Off IS Tolerant |
| 222832_PM_s_at | MFF       | mitochondrial fission factor                                            | 0.0011 | 1.51  | Normal up vs > 5 Years Off IS Tolerant   |
| 213152_PM_s_at | SRSF8     | serine/arginine-rich splicing factor 8                                  | 0.0011 | 1.89  | Normal up vs > 5 Years Off IS Tolerant   |
| 54632_PM_at    | THADA     | thyroid adenoma associated                                              | 0.0011 | 1.50  | Normal up vs > 5 Years Off IS Tolerant   |
| 205596_PM_s_at | SMURF2    | SMAD specific E3 ubiquitin protein ligase 2                             | 0.0011 | 1.41  | Normal up vs > 5 Years Off IS Tolerant   |
| 1555898_PM_at  | LOC400986 | Protein immuno-reactive with anti-PTH polyclonal antibodies             | 0.0011 | 1.51  | Normal up vs > 5 Years Off IS Tolerant   |
| 223338_PM_s_at | ATPIF1    | ATPase inhibitory factor 1                                              | 0.0011 | 1.38  | Normal up vs > 5 Years Off IS Tolerant   |
| 241365_PM_at   | SATB1     | SATB homeobox 1                                                         | 0.0011 | 2.49  | Normal up vs > 5 Years Off IS Tolerant   |
| 212995_PM_x_at | MZT2B     | mitotic spindle organizing protein 2B                                   | 0.0011 | 1.45  | Normal up vs > 5 Years Off IS Tolerant   |
| 242606_PM_at   | ---       | ---                                                                     | 0.0011 | 1.61  | Normal up vs > 5 Years Off IS Tolerant   |
| 1557534_PM_at  | LOC339862 | hypothetical LOC339862                                                  | 0.0011 | -1.84 | Normal down vs > 5 Years Off IS Tolerant |
| 244639_PM_at   | ---       | ---                                                                     | 0.0011 | -1.46 | Normal down vs > 5 Years Off IS Tolerant |
| 222988_PM_s_at | TMEM9     | transmembrane protein 9                                                 | 0.0011 | 1.71  | Normal up vs > 5 Years Off IS Tolerant   |
| 236089_PM_at   | ---       | ---                                                                     | 0.0011 | -1.82 | Normal down vs > 5 Years Off IS Tolerant |
| 227409_PM_at   | PPP1R3E   | protein phosphatase 1, regulatory (inhibitor) subunit 3E                | 0.0011 | 1.65  | Normal up vs > 5 Years Off IS Tolerant   |
| 202662_PM_s_at | ITPR2     | inositol 1,4,5-triphosphate receptor, type 2                            | 0.0011 | 1.69  | Normal up vs > 5 Years Off IS Tolerant   |
| 1556849_PM_at  | ---       | ---                                                                     | 0.0011 | 1.53  | Normal up vs > 5 Years Off IS Tolerant   |
| 201601_PM_x_at | IFITM1    | interferon induced transmembrane protein 1 (9-27)                       | 0.0011 | 1.67  | Normal up vs > 5 Years Off IS Tolerant   |
| 1562696_PM_at  | ---       | ---                                                                     | 0.0011 | -1.33 | Normal down vs > 5 Years Off IS Tolerant |
| 227686_PM_at   | OXNAD1    | oxidoreductase NAD-binding domain containing 1                          | 0.0011 | 2.92  | Normal up vs > 5 Years Off IS Tolerant   |
| 228141_PM_at   | GPX8      | glutathione peroxidase 8 (putative)                                     | 0.0011 | -1.33 | Normal down vs > 5 Years Off IS Tolerant |
| 242876_PM_at   | AKT3      | V-akt murine thymoma viral oncogene homolog 3 (protein kinase B, gamma) | 0.0011 | 1.93  | Normal up vs > 5 Years Off IS Tolerant   |
| 224492_PM_s_at | ZNF627    | zinc finger protein 627                                                 | 0.0011 | 1.89  | Normal up vs > 5 Years Off IS Tolerant   |
| 239611_PM_at   | ---       | ---                                                                     | 0.0011 | -1.46 | Normal down vs > 5 Years Off IS Tolerant |
| 51200_PM_at    | C19orf60  | chromosome 19 open reading frame 60                                     | 0.0011 | 1.35  | Normal up vs > 5 Years Off IS Tolerant   |
| 240620_PM_at   | ---       | ---                                                                     | 0.0012 | -1.56 | Normal down vs > 5 Years Off IS Tolerant |

|                 |              |                                                                                 |        |       |                                          |
|-----------------|--------------|---------------------------------------------------------------------------------|--------|-------|------------------------------------------|
| 232452_PM_at    | LOC148824    | hypothetical LOC148824                                                          | 0.0012 | -1.52 | Normal down vs > 5 Years Off IS Tolerant |
| 230201_PM_at    | FXR1         | fragile X mental retardation, autosomal homolog 1                               | 0.0012 | -1.29 | Normal down vs > 5 Years Off IS Tolerant |
| 214088_PM_s_at  | FUT3         | fucosyltransferase 3 (galactoside 3(4)-L-fucosyltransferase, Lewis blood group) | 0.0012 | -1.37 | Normal down vs > 5 Years Off IS Tolerant |
| 210461_PM_s_at  | ABLIM1       | actin binding LIM protein 1                                                     | 0.0012 | 1.94  | Normal up vs > 5 Years Off IS Tolerant   |
| 1559911_PM_at   | ---          | ---                                                                             | 0.0012 | -1.38 | Normal down vs > 5 Years Off IS Tolerant |
| 227037_PM_at    | PLD6         | phospholipase D family, member 6                                                | 0.0012 | 2.03  | Normal up vs > 5 Years Off IS Tolerant   |
| 230525_PM_at    | LOC100509223 | hypothetical LOC100509223                                                       | 0.0012 | -1.49 | Normal down vs > 5 Years Off IS Tolerant |
| 226433_PM_at    | RNF157       | ring finger protein 157                                                         | 0.0012 | 2.57  | Normal up vs > 5 Years Off IS Tolerant   |
| 225066_PM_at    | PPP2R2D      | protein phosphatase 2, regulatory subunit B, delta                              | 0.0012 | 2.02  | Normal up vs > 5 Years Off IS Tolerant   |
| 209922_PM_at    | BRAP         | BRCA1 associated protein                                                        | 0.0012 | 2.00  | Normal up vs > 5 Years Off IS Tolerant   |
| 1557897_PM_at   | ---          | ---                                                                             | 0.0012 | -1.45 | Normal down vs > 5 Years Off IS Tolerant |
| 202163_PM_s_at  | CNOT8        | CCR4-NOT transcription complex, subunit 8                                       | 0.0012 | 1.33  | Normal up vs > 5 Years Off IS Tolerant   |
| 224642_PM_at    | FYTTD1       | forty-two-three domain containing 1                                             | 0.0012 | 2.36  | Normal up vs > 5 Years Off IS Tolerant   |
| 218249_PM_at    | ZDHHC6       | zinc finger, DHHC-type containing 6                                             | 0.0012 | 1.31  | Normal up vs > 5 Years Off IS Tolerant   |
| 243532_PM_at    | LNPEP        | leucyl/cystinyl aminopeptidase                                                  | 0.0012 | -1.53 | Normal down vs > 5 Years Off IS Tolerant |
| 225986_PM_x_at  | CPSF2        | cleavage and polyadenylation specific factor 2, 100kDa                          | 0.0012 | -2.06 | Normal down vs > 5 Years Off IS Tolerant |
| 1556663_PM_s_at | ---          | ---                                                                             | 0.0012 | -1.37 | Normal down vs > 5 Years Off IS Tolerant |
| 241954_PM_at    | FDFT1        | Farnesyl-diphosphate farnesyltransferase 1                                      | 0.0012 | 1.80  | Normal up vs > 5 Years Off IS Tolerant   |
| 231383_PM_at    | ---          | ---                                                                             | 0.0012 | 1.37  | Normal up vs > 5 Years Off IS Tolerant   |
| 205229_PM_s_at  | COCH         | coagulation factor C homolog, cochlin (Limulus polyphemus)                      | 0.0012 | 1.67  | Normal up vs > 5 Years Off IS Tolerant   |
| 211323_PM_s_at  | ITPR1        | inositol 1,4,5-triphosphate receptor, type 1                                    | 0.0012 | 1.92  | Normal up vs > 5 Years Off IS Tolerant   |
| 237246_PM_at    | ---          | ---                                                                             | 0.0012 | 2.24  | Normal up vs > 5 Years Off IS Tolerant   |
| 1557215_PM_at   | ---          | ---                                                                             | 0.0012 | -1.91 | Normal down vs > 5 Years Off IS Tolerant |
| 242769_PM_at    | ---          | ---                                                                             | 0.0012 | -1.43 | Normal down vs > 5 Years Off IS Tolerant |
| 238761_PM_at    | ELK4         | ELK4, ETS-domain protein (SRF accessory protein 1)                              | 0.0012 | 1.80  | Normal up vs > 5 Years Off IS Tolerant   |
| 234294_PM_x_at  | GATAD2A      | GATA zinc finger domain containing 2A                                           | 0.0012 | 1.45  | Normal up vs > 5 Years Off IS Tolerant   |
| 201581_PM_at    | TMX4         | thioredoxin-related transmembrane protein 4                                     | 0.0012 | 1.54  | Normal up vs > 5 Years Off IS Tolerant   |

|                |         |                                                           |        |       |                                          |
|----------------|---------|-----------------------------------------------------------|--------|-------|------------------------------------------|
| 242022_PM_at   | ---     | ---                                                       | 0.0012 | -1.36 | Normal down vs > 5 Years Off IS Tolerant |
| 235445_PM_at   | ---     | ---                                                       | 0.0012 | -1.49 | Normal down vs > 5 Years Off IS Tolerant |
| 227732_PM_at   | ATXN7L1 | ataxin 7-like 1                                           | 0.0012 | 1.52  | Normal up vs > 5 Years Off IS Tolerant   |
| 208091_PM_s_at | VOPP1   | vesicular, overexpressed in cancer, prosurvival protein 1 | 0.0012 | 1.34  | Normal up vs > 5 Years Off IS Tolerant   |
| 240580_PM_at   | ---     | ---                                                       | 0.0012 | -1.70 | Normal down vs > 5 Years Off IS Tolerant |
| 204658_PM_at   | TRA2A   | transformer 2 alpha homolog (Drosophila)                  | 0.0012 | 1.36  | Normal up vs > 5 Years Off IS Tolerant   |
| 209004_PM_s_at | FBXL5   | F-box and leucine-rich repeat protein 5                   | 0.0012 | -1.41 | Normal down vs > 5 Years Off IS Tolerant |
| 239201_PM_at   | CDK15   | cyclin-dependent kinase 15                                | 0.0012 | -1.70 | Normal down vs > 5 Years Off IS Tolerant |
| 236506_PM_at   | ---     | ---                                                       | 0.0012 | 1.89  | Normal up vs > 5 Years Off IS Tolerant   |
| 203364_PM_s_at | ATG13   | ATG13 autophagy related 13 homolog (S. cerevisiae)        | 0.0012 | 1.46  | Normal up vs > 5 Years Off IS Tolerant   |
| 206083_PM_at   | BAI1    | brain-specific angiogenesis inhibitor 1                   | 0.0012 | -1.33 | Normal down vs > 5 Years Off IS Tolerant |
| 204231_PM_s_at | FAAH    | fatty acid amide hydrolase                                | 0.0012 | -1.45 | Normal down vs > 5 Years Off IS Tolerant |
| 243474_PM_at   | ---     | ---                                                       | 0.0012 | -1.50 | Normal down vs > 5 Years Off IS Tolerant |
| 207734_PM_at   | LAX1    | lymphocyte transmembrane adaptor 1                        | 0.0012 | 1.70  | Normal up vs > 5 Years Off IS Tolerant   |
| 219657_PM_s_at | KLF3    | Kruppel-like factor 3 (basic)                             | 0.0012 | 1.74  | Normal up vs > 5 Years Off IS Tolerant   |
| 203868_PM_s_at | VCAM1   | vascular cell adhesion molecule 1                         | 0.0012 | -1.65 | Normal down vs > 5 Years Off IS Tolerant |
| 214022_PM_s_at | IFITM1  | interferon induced transmembrane protein 1 (9-27)         | 0.0012 | 1.69  | Normal up vs > 5 Years Off IS Tolerant   |
| 203083_PM_at   | THBS2   | thrombospondin 2                                          | 0.0012 | -1.42 | Normal down vs > 5 Years Off IS Tolerant |
| 201534_PM_s_at | UBL3    | ubiquitin-like 3                                          | 0.0012 | 1.71  | Normal up vs > 5 Years Off IS Tolerant   |
| 1563271_PM_at  | ---     | ---                                                       | 0.0012 | -1.43 | Normal down vs > 5 Years Off IS Tolerant |
| 217097_PM_s_at | PHTF2   | putative homeodomain transcription factor 2               | 0.0012 | -1.73 | Normal down vs > 5 Years Off IS Tolerant |
| 212986_PM_s_at | TLK2    | tousled-like kinase 2                                     | 0.0012 | 1.64  | Normal up vs > 5 Years Off IS Tolerant   |
| 204867_PM_at   | GCHFR   | GTP cyclohydrolase I feedback regulator                   | 0.0012 | 1.81  | Normal up vs > 5 Years Off IS Tolerant   |
| 220877_PM_at   | ---     | ---                                                       | 0.0012 | -1.93 | Normal down vs > 5 Years Off IS Tolerant |
| 236826_PM_at   | TTC39B  | Tetratricopeptide repeat domain 39B                       | 0.0012 | 1.52  | Normal up vs > 5 Years Off IS Tolerant   |

|                |           |                                                            |        |       |                                          |
|----------------|-----------|------------------------------------------------------------|--------|-------|------------------------------------------|
| 205849_PM_s_at | UQCRB     | ubiquinol-cytochrome c reductase binding protein           | 0.0012 | 1.31  | Normal up vs > 5 Years Off IS Tolerant   |
| 202744_PM_at   | SLC20A2   | solute carrier family 20 (phosphate transporter), member 2 | 0.0012 | 1.50  | Normal up vs > 5 Years Off IS Tolerant   |
| 1560665_PM_at  | SCPEP1    | serine carboxypeptidase 1                                  | 0.0012 | -1.50 | Normal down vs > 5 Years Off IS Tolerant |
| 240025_PM_x_at | ---       | ---                                                        | 0.0012 | 1.99  | Normal up vs > 5 Years Off IS Tolerant   |
| 217895_PM_at   | PTCD3     | Pentatricopeptide repeat domain 3                          | 0.0012 | 1.37  | Normal up vs > 5 Years Off IS Tolerant   |
| 202371_PM_at   | TCEAL4    | transcription elongation factor A (SII)-like 4             | 0.0012 | 1.83  | Normal up vs > 5 Years Off IS Tolerant   |
| 220300_PM_at   | RGS3      | regulator of G-protein signaling 3                         | 0.0012 | -1.37 | Normal down vs > 5 Years Off IS Tolerant |
| 221061_PM_at   | PKD2L1    | polycystic kidney disease 2-like 1                         | 0.0012 | -1.34 | Normal down vs > 5 Years Off IS Tolerant |
| 211753_PM_s_at | RLN1      | relaxin 1                                                  | 0.0012 | -1.76 | Normal down vs > 5 Years Off IS Tolerant |
| 217805_PM_at   | ILF3      | interleukin enhancer binding factor 3, 90kDa               | 0.0012 | 1.51  | Normal up vs > 5 Years Off IS Tolerant   |
| 224736_PM_at   | CCAR1     | cell division cycle and apoptosis regulator 1              | 0.0012 | 1.30  | Normal up vs > 5 Years Off IS Tolerant   |
| 215358_PM_x_at | ZNF37BP   | zinc finger protein 37B, pseudogene                        | 0.0012 | 2.18  | Normal up vs > 5 Years Off IS Tolerant   |
| 217669_PM_s_at | AKAP6     | A kinase (PRKA) anchor protein 6                           | 0.0012 | -1.37 | Normal down vs > 5 Years Off IS Tolerant |
| 204249_PM_s_at | LMO2      | LIM domain only 2 (rhombotin-like 1)                       | 0.0012 | -1.66 | Normal down vs > 5 Years Off IS Tolerant |
| 209510_PM_at   | RNF139    | ring finger protein 139                                    | 0.0012 | 1.49  | Normal up vs > 5 Years Off IS Tolerant   |
| 244491_PM_at   | ---       | ---                                                        | 0.0012 | -1.51 | Normal down vs > 5 Years Off IS Tolerant |
| 238496_PM_at   | ---       | ---                                                        | 0.0012 | 1.50  | Normal up vs > 5 Years Off IS Tolerant   |
| 240828_PM_at   | ---       | ---                                                        | 0.0012 | 1.55  | Normal up vs > 5 Years Off IS Tolerant   |
| 239958_PM_at   | LOC253039 | hypothetical LOC253039                                     | 0.0012 | -1.37 | Normal down vs > 5 Years Off IS Tolerant |
| 220153_PM_at   | ENTPD7    | ectonucleoside triphosphate diphosphohydrolase 7           | 0.0012 | -1.51 | Normal down vs > 5 Years Off IS Tolerant |
| 234008_PM_s_at | CES3      | carboxylesterase 3                                         | 0.0012 | -1.41 | Normal down vs > 5 Years Off IS Tolerant |
| 210909_PM_x_at | LPAL2     | lipoprotein, Lp(a)-like 2, pseudogene                      | 0.0012 | -1.37 | Normal down vs > 5 Years Off IS Tolerant |
| 226812_PM_at   | ---       | ---                                                        | 0.0012 | -1.35 | Normal down vs > 5 Years Off IS Tolerant |
| 242714_PM_at   | ---       | ---                                                        | 0.0012 | -2.20 | Normal down vs > 5 Years Off IS Tolerant |

|                |        |                                                    |        |       |                                          |
|----------------|--------|----------------------------------------------------|--------|-------|------------------------------------------|
| 1560018_PM_at  | ARPP21 | cAMP-regulated phosphoprotein, 21kDa               | 0.0012 | -1.45 | Normal down vs > 5 Years Off IS Tolerant |
| 234254_PM_at   | ---    | ---                                                | 0.0012 | 1.39  | Normal up vs > 5 Years Off IS Tolerant   |
| 213078_PM_x_at | LPCAT4 | lysophosphatidylcholine acyltransferase 4          | 0.0012 | 1.62  | Normal up vs > 5 Years Off IS Tolerant   |
| 233424_PM_at   | ---    | ---                                                | 0.0012 | -1.32 | Normal down vs > 5 Years Off IS Tolerant |
| 203100_PM_s_at | CDYL   | chromodomain protein, Y-like                       | 0.0012 | 1.60  | Normal up vs > 5 Years Off IS Tolerant   |
| 242959_PM_at   | ---    | ---                                                | 0.0012 | -1.43 | Normal down vs > 5 Years Off IS Tolerant |
| 1566637_PM_at  | ---    | ---                                                | 0.0012 | -2.21 | Normal down vs > 5 Years Off IS Tolerant |
| 243154_PM_at   | ---    | ---                                                | 0.0012 | 2.03  | Normal up vs > 5 Years Off IS Tolerant   |
| 1558199_PM_at  | FN1    | fibronectin 1                                      | 0.0012 | -1.42 | Normal down vs > 5 Years Off IS Tolerant |
| 235848_PM_x_at | ---    | ---                                                | 0.0012 | 1.70  | Normal up vs > 5 Years Off IS Tolerant   |
| 204757_PM_s_at | C2CD2L | C2CD2-like                                         | 0.0012 | -1.47 | Normal down vs > 5 Years Off IS Tolerant |
| 220739_PM_s_at | CNNM3  | cyclin M3                                          | 0.0012 | 1.68  | Normal up vs > 5 Years Off IS Tolerant   |
| 234993_PM_at   | ABHD13 | abhydrolase domain containing 13                   | 0.0012 | 2.52  | Normal up vs > 5 Years Off IS Tolerant   |
| 201579_PM_at   | FAT1   | FAT tumor suppressor homolog 1 (Drosophila)        | 0.0012 | -1.39 | Normal down vs > 5 Years Off IS Tolerant |
| 228853_PM_at   | STYX   | serine/threonine/tyrosine interacting protein      | 0.0012 | 1.55  | Normal up vs > 5 Years Off IS Tolerant   |
| 203981_PM_s_at | ABCD4  | ATP-binding cassette, sub-family D (ALD), member 4 | 0.0012 | 1.55  | Normal up vs > 5 Years Off IS Tolerant   |
| 1569741_PM_at  | ---    | ---                                                | 0.0012 | -1.38 | Normal down vs > 5 Years Off IS Tolerant |
| 226044_PM_at   | TDP1   | tyrosyl-DNA phosphodiesterase 1                    | 0.0012 | 1.43  | Normal up vs > 5 Years Off IS Tolerant   |
| 228395_PM_at   | GLT8D1 | Glycosyltransferase 8 domain containing 1          | 0.0012 | 1.80  | Normal up vs > 5 Years Off IS Tolerant   |
| 219144_PM_at   | DUSP26 | dual specificity phosphatase 26 (putative)         | 0.0012 | -1.32 | Normal down vs > 5 Years Off IS Tolerant |
| 234606_PM_at   | ---    | ---                                                | 0.0012 | -1.60 | Normal down vs > 5 Years Off IS Tolerant |
| 201656_PM_at   | ITGA6  | integrin, alpha 6                                  | 0.0012 | 2.41  | Normal up vs > 5 Years Off IS Tolerant   |
| 231048_PM_at   | ---    | ---                                                | 0.0012 | -1.24 | Normal down vs > 5 Years Off IS Tolerant |
| 212377_PM_s_at | NOTCH2 | notch 2                                            | 0.0013 | -1.30 | Normal down vs > 5 Years Off IS Tolerant |
| 243616_PM_at   | ---    | ---                                                | 0.0013 | -1.37 | Normal down vs > 5 Years Off IS Tolerant |

|                |                                                          |                                                                                            |        |       |                                          |
|----------------|----------------------------------------------------------|--------------------------------------------------------------------------------------------|--------|-------|------------------------------------------|
| 207569_PM_at   | ROS1                                                     | c-ros oncogene 1 , receptor tyrosine kinase                                                | 0.0013 | -1.41 | Normal down vs > 5 Years Off IS Tolerant |
| 228497_PM_at   | SLC22A15                                                 | solute carrier family 22, member 15                                                        | 0.0013 | -2.13 | Normal down vs > 5 Years Off IS Tolerant |
| 242232_PM_at   | ---                                                      | ---                                                                                        | 0.0013 | -2.56 | Normal down vs > 5 Years Off IS Tolerant |
| 241225_PM_at   | ---                                                      | ---                                                                                        | 0.0013 | -1.41 | Normal down vs > 5 Years Off IS Tolerant |
| 208282_PM_x_at | DAZ1 /// DAZ2 ///<br>DAZ3 /// DAZ4                       | deleted in azoospermia 1 /// deleted in azoospermia 2<br>/// deleted in azoospermia 3 ///  | 0.0013 | -1.41 | Normal down vs > 5 Years Off IS Tolerant |
| 201857_PM_at   | ZFR                                                      | zinc finger RNA binding protein                                                            | 0.0013 | 1.30  | Normal up vs > 5 Years Off IS Tolerant   |
| 219098_PM_at   | MYBBP1A                                                  | MYB binding protein (P160) 1a                                                              | 0.0013 | 1.46  | Normal up vs > 5 Years Off IS Tolerant   |
| 207124_PM_s_at | GNB5                                                     | guanine nucleotide binding protein (G protein), beta 5                                     | 0.0013 | 2.34  | Normal up vs > 5 Years Off IS Tolerant   |
| 221458_PM_at   | HTR1F                                                    | 5-hydroxytryptamine (serotonin) receptor 1F                                                | 0.0013 | -1.53 | Normal down vs > 5 Years Off IS Tolerant |
| 236980_PM_at   | ---                                                      | ---                                                                                        | 0.0013 | -1.66 | Normal down vs > 5 Years Off IS Tolerant |
| 1569659_PM_at  | LOC100506895                                             | hypothetical LOC100506895                                                                  | 0.0013 | -1.39 | Normal down vs > 5 Years Off IS Tolerant |
| 208938_PM_at   | PRCC                                                     | papillary renal cell carcinoma (translocation-associated)                                  | 0.0013 | 1.57  | Normal up vs > 5 Years Off IS Tolerant   |
| 201004_PM_at   | SSR4                                                     | signal sequence receptor, delta (translocon-associated protein delta)                      | 0.0013 | 1.35  | Normal up vs > 5 Years Off IS Tolerant   |
| 218893_PM_at   | ISOC2                                                    | isochorismatase domain containing 2                                                        | 0.0013 | -1.51 | Normal down vs > 5 Years Off IS Tolerant |
| 1561902_PM_at  | ---                                                      | ---                                                                                        | 0.0013 | -1.33 | Normal down vs > 5 Years Off IS Tolerant |
| 1553181_PM_at  | DDX31                                                    | DEAD (Asp-Glu-Ala-Asp) box polypeptide 31                                                  | 0.0013 | -1.44 | Normal down vs > 5 Years Off IS Tolerant |
| 205495_PM_s_at | GNLY                                                     | granulysin                                                                                 | 0.0013 | 3.29  | Normal up vs > 5 Years Off IS Tolerant   |
| 1562722_PM_at  | PRR20A /// PRR20B<br>/// PRR20C ///<br>PRR20D /// PRR20E | proline rich 20A /// proline rich 20B /// proline rich 20C<br>/// proline rich 20D /// pro | 0.0013 | -1.32 | Normal down vs > 5 Years Off IS Tolerant |
| 216041_PM_x_at | GRN                                                      | granulin                                                                                   | 0.0013 | -1.68 | Normal down vs > 5 Years Off IS Tolerant |
| 214314_PM_s_at | EIF5B                                                    | eukaryotic translation initiation factor 5B                                                | 0.0013 | 1.78  | Normal up vs > 5 Years Off IS Tolerant   |

|                 |                              |                                                                                           |        |       |                                          |
|-----------------|------------------------------|-------------------------------------------------------------------------------------------|--------|-------|------------------------------------------|
| 232080_PM_at    | HECW2                        | HECT, C2 and WW domain containing E3 ubiquitin protein ligase 2                           | 0.0013 | -1.36 | Normal down vs > 5 Years Off IS Tolerant |
| 224957_PM_at    | C18orf32                     | chromosome 18 open reading frame 32                                                       | 0.0013 | 1.66  | Normal up vs > 5 Years Off IS Tolerant   |
| 215328_PM_at    | EFR3B                        | EFR3 homolog B ( <i>S. cerevisiae</i> )                                                   | 0.0013 | -1.30 | Normal down vs > 5 Years Off IS Tolerant |
| 218919_PM_at    | ZFAND1                       | zinc finger, AN1-type domain 1                                                            | 0.0013 | 1.79  | Normal up vs > 5 Years Off IS Tolerant   |
| 210220_PM_at    | FZD2                         | frizzled homolog 2 ( <i>Drosophila</i> )                                                  | 0.0013 | -2.37 | Normal down vs > 5 Years Off IS Tolerant |
| 236658_PM_at    | ---                          | ---                                                                                       | 0.0013 | -1.28 | Normal down vs > 5 Years Off IS Tolerant |
| 211925_PM_s_at  | PLCB1                        | phospholipase C, beta 1 (phosphoinositide-specific)                                       | 0.0013 | -1.45 | Normal down vs > 5 Years Off IS Tolerant |
| 1568924_PM_a_at | IQUB                         | IQ motif and ubiquitin domain containing                                                  | 0.0013 | -2.33 | Normal down vs > 5 Years Off IS Tolerant |
| 236379_PM_at    | ---                          | ---                                                                                       | 0.0013 | 1.90  | Normal up vs > 5 Years Off IS Tolerant   |
| 212207_PM_at    | MED13L                       | mediator complex subunit 13-like                                                          | 0.0013 | 1.51  | Normal up vs > 5 Years Off IS Tolerant   |
| 223546_PM_x_at  | LUC7L                        | LUC7-like ( <i>S. cerevisiae</i> )                                                        | 0.0013 | 1.38  | Normal up vs > 5 Years Off IS Tolerant   |
| 212610_PM_at    | PTPN11                       | protein tyrosine phosphatase, non-receptor type 11                                        | 0.0013 | 1.29  | Normal up vs > 5 Years Off IS Tolerant   |
| 237771_PM_s_at  | ---                          | ---                                                                                       | 0.0013 | -2.53 | Normal down vs > 5 Years Off IS Tolerant |
| 228835_PM_at    | ---                          | ---                                                                                       | 0.0013 | 1.84  | Normal up vs > 5 Years Off IS Tolerant   |
| 229881_PM_at    | KLF12                        | Kruppel-like factor 12                                                                    | 0.0013 | 1.92  | Normal up vs > 5 Years Off IS Tolerant   |
| 229679_PM_at    | C12orf76 ///<br>LOC100510175 | chromosome 12 open reading frame 76 /// hypothetical<br>LOC100510175                      | 0.0013 | 1.85  | Normal up vs > 5 Years Off IS Tolerant   |
| 226111_PM_s_at  | ZNF385A                      | zinc finger protein 385A                                                                  | 0.0013 | -1.53 | Normal down vs > 5 Years Off IS Tolerant |
| 239473_PM_x_at  | LOC100288104                 | Hypothetical protein LOC100288104                                                         | 0.0013 | -1.44 | Normal down vs > 5 Years Off IS Tolerant |
| 1553619_PM_a_at | TRIM43 ///<br>TRIM43B        | tripartite motif-containing 43 /// tripartite motif-<br>containing 43B                    | 0.0013 | -1.54 | Normal down vs > 5 Years Off IS Tolerant |
| 216185_PM_at    | FUT9                         | Fucosyltransferase 9 (alpha (1,3) fucosyltransferase)                                     | 0.0013 | -1.28 | Normal down vs > 5 Years Off IS Tolerant |
| 210070_PM_s_at  | CHKB-CPT1B ///<br>CPT1B      | choline kinase-like, carnitine palmitoyltransferase 1B<br>(muscle) transcription unit /// | 0.0013 | 2.28  | Normal up vs > 5 Years Off IS Tolerant   |
| 218579_PM_s_at  | DHX35                        | DEAH (Asp-Glu-Ala-His) box polypeptide 35                                                 | 0.0013 | 1.36  | Normal up vs > 5 Years Off IS Tolerant   |
| 1562270_PM_at   | ARHGEF7                      | Rho guanine nucleotide exchange factor (GEF) 7                                            | 0.0013 | 1.73  | Normal up vs > 5 Years Off IS Tolerant   |
| 215851_PM_at    | MECOM                        | MDS1 and EVI1 complex locus                                                               | 0.0013 | -1.54 | Normal down vs > 5 Years Off IS Tolerant |
| 239709_PM_at    | ---                          | ---                                                                                       | 0.0013 | 1.77  | Normal up vs > 5 Years Off IS Tolerant   |



|                 |                        |                                                                                         |        |       |                                          |
|-----------------|------------------------|-----------------------------------------------------------------------------------------|--------|-------|------------------------------------------|
| 1554057_PM_at   | LOC645676              | hypothetical LOC645676                                                                  | 0.0013 | 1.78  | Normal up vs > 5 Years Off IS Tolerant   |
| 203704_PM_s_at  | RREB1                  | ras responsive element binding protein 1                                                | 0.0013 | 1.26  | Normal up vs > 5 Years Off IS Tolerant   |
| 1560382_PM_at   | GAB1                   | GRB2-associated binding protein 1                                                       | 0.0013 | -1.33 | Normal down vs > 5 Years Off IS Tolerant |
| 221535_PM_at    | LSG1                   | large subunit GTPase 1 homolog (S. cerevisiae)                                          | 0.0013 | 1.69  | Normal up vs > 5 Years Off IS Tolerant   |
| 227484_PM_at    | SRGAP1                 | SLIT-ROBO Rho GTPase activating protein 1                                               | 0.0013 | -1.47 | Normal down vs > 5 Years Off IS Tolerant |
| 243085_PM_at    | ---                    | ---                                                                                     | 0.0013 | -1.46 | Normal down vs > 5 Years Off IS Tolerant |
| 234964_PM_at    | TRD@                   | T cell receptor delta locus                                                             | 0.0013 | 1.92  | Normal up vs > 5 Years Off IS Tolerant   |
| 204891_PM_s_at  | LCK                    | lymphocyte-specific protein tyrosine kinase                                             | 0.0013 | 2.27  | Normal up vs > 5 Years Off IS Tolerant   |
| 240618_PM_at    | PTPRA                  | Protein tyrosine phosphatase, receptor type, A                                          | 0.0013 | -1.28 | Normal down vs > 5 Years Off IS Tolerant |
| 243457_PM_s_at  | ZNF214                 | zinc finger protein 214                                                                 | 0.0013 | -1.32 | Normal down vs > 5 Years Off IS Tolerant |
| 202467_PM_s_at  | COPS2                  | COP9 constitutive photomorphogenic homolog subunit 2 (Arabidopsis)                      | 0.0013 | 1.42  | Normal up vs > 5 Years Off IS Tolerant   |
| 223618_PM_at    | FMN2                   | formin 2                                                                                | 0.0013 | -1.70 | Normal down vs > 5 Years Off IS Tolerant |
| 220999_PM_s_at  | CYFIP2                 | cytoplasmic FMR1 interacting protein 2                                                  | 0.0013 | 1.80  | Normal up vs > 5 Years Off IS Tolerant   |
| 233644_PM_at    | KATNAL2                | katanin p60 subunit A-like 2                                                            | 0.0013 | -1.32 | Normal down vs > 5 Years Off IS Tolerant |
| 208374_PM_s_at  | CAPZA1                 | capping protein (actin filament) muscle Z-line, alpha 1                                 | 0.0014 | -1.23 | Normal down vs > 5 Years Off IS Tolerant |
| 204794_PM_at    | DUSP2                  | dual specificity phosphatase 2                                                          | 0.0014 | 3.31  | Normal up vs > 5 Years Off IS Tolerant   |
| 1560662_PM_s_at | WHAMML1 ///<br>WHAMML2 | WAS protein homolog associated with actin, golgi membranes and microtubules-like 1 (pse | 0.0014 | 2.13  | Normal up vs > 5 Years Off IS Tolerant   |
| 223248_PM_at    | HSDL1                  | hydroxysteroid dehydrogenase like 1                                                     | 0.0014 | 1.86  | Normal up vs > 5 Years Off IS Tolerant   |
| 231339_PM_at    | TSPYL6                 | TSPY-like 6                                                                             | 0.0014 | -1.44 | Normal down vs > 5 Years Off IS Tolerant |
| 213974_PM_at    | ADAMTSL3               | ADAMTS-like 3                                                                           | 0.0014 | -1.45 | Normal down vs > 5 Years Off IS Tolerant |
| 216823_PM_at    | RPS3A                  | ribosomal protein S3A                                                                   | 0.0014 | 1.33  | Normal up vs > 5 Years Off IS Tolerant   |
| 207074_PM_s_at  | SLC18A1                | solute carrier family 18 (vesicular monoamine), member 1                                | 0.0014 | -1.32 | Normal down vs > 5 Years Off IS Tolerant |
| 240114_PM_s_at  | TMEM174                | transmembrane protein 174                                                               | 0.0014 | -1.41 | Normal down vs > 5 Years Off IS Tolerant |
| 239315_PM_at    | FAM115C                | family with sequence similarity 115, member C                                           | 0.0014 | -1.47 | Normal down vs > 5 Years Off IS Tolerant |

|                 |                        |                                                                                             |        |       |                                          |
|-----------------|------------------------|---------------------------------------------------------------------------------------------|--------|-------|------------------------------------------|
| 226830_PM_x_at  | CHD2                   | Chromodomain helicase DNA binding protein 2                                                 | 0.0014 | 1.58  | Normal up vs > 5 Years Off IS Tolerant   |
| 204425_PM_at    | ARHGAP4                | Rho GTPase activating protein 4                                                             | 0.0014 | 1.55  | Normal up vs > 5 Years Off IS Tolerant   |
| 202455_PM_at    | HDAC5                  | histone deacetylase 5                                                                       | 0.0014 | 1.61  | Normal up vs > 5 Years Off IS Tolerant   |
| 202451_PM_at    | GTF2H1                 | general transcription factor IIH, polypeptide 1, 62kDa                                      | 0.0014 | -1.93 | Normal down vs > 5 Years Off IS Tolerant |
| 41858_PM_at     | PGAP2                  | post-GPI attachment to proteins 2                                                           | 0.0014 | 1.50  | Normal up vs > 5 Years Off IS Tolerant   |
| 1564424_PM_at   | ---                    | ---                                                                                         | 0.0014 | 2.84  | Normal up vs > 5 Years Off IS Tolerant   |
| 236921_PM_at    | ---                    | ---                                                                                         | 0.0014 | 1.81  | Normal up vs > 5 Years Off IS Tolerant   |
| 206612_PM_at    | CACNG1                 | calcium channel, voltage-dependent, gamma subunit 1                                         | 0.0014 | -1.41 | Normal down vs > 5 Years Off IS Tolerant |
| 1562447_PM_a_at | ---                    | ---                                                                                         | 0.0014 | -1.37 | Normal down vs > 5 Years Off IS Tolerant |
| 221191_PM_at    | STAG3L1                | stromal antigen 3-like 1                                                                    | 0.0014 | 1.66  | Normal up vs > 5 Years Off IS Tolerant   |
| 218776_PM_s_at  | TMEM62                 | transmembrane protein 62                                                                    | 0.0014 | 1.50  | Normal up vs > 5 Years Off IS Tolerant   |
| 205689_PM_at    | PCNXL2                 | pecanex-like 2 (Drosophila)                                                                 | 0.0014 | 1.61  | Normal up vs > 5 Years Off IS Tolerant   |
| 224233_PM_s_at  | MSTO1 ///<br>MSTO2P    | misato homolog 1 (Drosophila) /// misato homolog 2<br>pseudogene                            | 0.0014 | 1.54  | Normal up vs > 5 Years Off IS Tolerant   |
| 231958_PM_at    | C3orf31                | Chromosome 3 open reading frame 31                                                          | 0.0014 | 1.66  | Normal up vs > 5 Years Off IS Tolerant   |
| 225125_PM_at    | MMGT1                  | membrane magnesium transporter 1                                                            | 0.0014 | 1.51  | Normal up vs > 5 Years Off IS Tolerant   |
| 223282_PM_at    | TSHZ1                  | teashirt zinc finger homeobox 1                                                             | 0.0014 | 1.89  | Normal up vs > 5 Years Off IS Tolerant   |
| 215714_PM_s_at  | SMARCA4                | SWI/SNF related, matrix associated, actin dependent<br>regulator of chromatin, subfamily a  | 0.0014 | 1.63  | Normal up vs > 5 Years Off IS Tolerant   |
| 229034_PM_at    | SOBP                   | sine oculis binding protein homolog (Drosophila)                                            | 0.0014 | -1.33 | Normal down vs > 5 Years Off IS Tolerant |
| 1554784_PM_at   | CNTN1                  | contactin 1                                                                                 | 0.0014 | -1.36 | Normal down vs > 5 Years Off IS Tolerant |
| 209103_PM_s_at  | UFD1L                  | ubiquitin fusion degradation 1 like (yeast)                                                 | 0.0014 | 1.47  | Normal up vs > 5 Years Off IS Tolerant   |
| 225512_PM_at    | ZBTB38                 | zinc finger and BTB domain containing 38                                                    | 0.0014 | 2.21  | Normal up vs > 5 Years Off IS Tolerant   |
| 216698_PM_x_at  | OR7E35P ///<br>OR7E37P | olfactory receptor, family 7, subfamily E, member 35<br>pseudogene /// olfactory receptor,  | 0.0014 | -1.45 | Normal down vs > 5 Years Off IS Tolerant |
| 203495_PM_at    | LRRC14                 | leucine rich repeat containing 14                                                           | 0.0014 | 1.35  | Normal up vs > 5 Years Off IS Tolerant   |
| 233602_PM_at    | ---                    | ---                                                                                         | 0.0014 | -1.41 | Normal down vs > 5 Years Off IS Tolerant |
| 1566162_PM_x_at | ---                    | ---                                                                                         | 0.0014 | -1.49 | Normal down vs > 5 Years Off IS Tolerant |
| 206147_PM_x_at  | SCML2                  | sex comb on midleg-like 2 (Drosophila)                                                      | 0.0014 | 1.59  | Normal up vs > 5 Years Off IS Tolerant   |
| 203528_PM_at    | SEMA4D                 | sema domain, immunoglobulin domain (Ig),<br>transmembrane domain (TM) and short cytoplasmic | 0.0014 | 1.38  | Normal up vs > 5 Years Off IS Tolerant   |

|                 |              |                                                                            |        |       |                                          |
|-----------------|--------------|----------------------------------------------------------------------------|--------|-------|------------------------------------------|
| 237284_PM_at    | DNAJB8       | DnaJ (Hsp40) homolog, subfamily B, member 8                                | 0.0014 | -1.29 | Normal down vs > 5 Years Off IS Tolerant |
| 204446_PM_s_at  | ALOX5        | arachidonate 5-lipoxygenase                                                | 0.0014 | -1.42 | Normal down vs > 5 Years Off IS Tolerant |
| 226596_PM_x_at  | LOC729852    | hypothetical LOC729852                                                     | 0.0014 | 1.85  | Normal up vs > 5 Years Off IS Tolerant   |
| 231118_PM_at    | ANKRD35      | ankyrin repeat domain 35                                                   | 0.0014 | -1.47 | Normal down vs > 5 Years Off IS Tolerant |
| 234517_PM_at    | ---          | ---                                                                        | 0.0014 | -1.59 | Normal down vs > 5 Years Off IS Tolerant |
| 206166_PM_s_at  | CLCA2        | chloride channel accessory 2                                               | 0.0014 | -1.47 | Normal down vs > 5 Years Off IS Tolerant |
| 1556874_PM_a_at | MEX3C        | mex-3 homolog C (C. elegans)                                               | 0.0014 | 2.42  | Normal up vs > 5 Years Off IS Tolerant   |
| 224815_PM_at    | COMM7        | COMM domain containing 7                                                   | 0.0014 | 1.33  | Normal up vs > 5 Years Off IS Tolerant   |
| 235452_PM_at    | ---          | ---                                                                        | 0.0014 | 1.63  | Normal up vs > 5 Years Off IS Tolerant   |
| 202205_PM_at    | VASP         | vasodilator-stimulated phosphoprotein                                      | 0.0014 | -1.36 | Normal down vs > 5 Years Off IS Tolerant |
| 220779_PM_at    | PADI3        | peptidyl arginine deiminase, type III                                      | 0.0014 | -1.29 | Normal down vs > 5 Years Off IS Tolerant |
| 1558728_PM_at   | LOC100128881 | hypothetical LOC100128881                                                  | 0.0014 | -1.53 | Normal down vs > 5 Years Off IS Tolerant |
| 244677_PM_at    | ---          | ---                                                                        | 0.0014 | 1.92  | Normal up vs > 5 Years Off IS Tolerant   |
| 225643_PM_at    | MAPK1IP1L    | mitogen-activated protein kinase 1 interacting protein 1-like              | 0.0014 | 1.51  | Normal up vs > 5 Years Off IS Tolerant   |
| 228055_PM_at    | NAPSB        | napsin B aspartic peptidase pseudogene                                     | 0.0014 | -2.25 | Normal down vs > 5 Years Off IS Tolerant |
| 221400_PM_at    | MYO3A        | myosin IIIA                                                                | 0.0014 | -1.35 | Normal down vs > 5 Years Off IS Tolerant |
| 202427_PM_s_at  | BRP44        | brain protein 44                                                           | 0.0014 | 1.50  | Normal up vs > 5 Years Off IS Tolerant   |
| 213000_PM_at    | MORC3        | MORC family CW-type zinc finger 3                                          | 0.0014 | 1.62  | Normal up vs > 5 Years Off IS Tolerant   |
| 212078_PM_s_at  | MLL          | myeloid/lymphoid or mixed-lineage leukemia (trithorax homolog, Drosophila) | 0.0014 | 1.53  | Normal up vs > 5 Years Off IS Tolerant   |
| 1555889_PM_a_at | CRTAP        | cartilage associated protein                                               | 0.0014 | -1.47 | Normal down vs > 5 Years Off IS Tolerant |
| 204829_PM_s_at  | FOLR2        | folate receptor 2 (fetal)                                                  | 0.0014 | -1.62 | Normal down vs > 5 Years Off IS Tolerant |
| 221019_PM_s_at  | COLEC12      | collectin sub-family member 12                                             | 0.0014 | -1.33 | Normal down vs > 5 Years Off IS Tolerant |
| 233508_PM_at    | MAP3K13      | mitogen-activated protein kinase kinase kinase 13                          | 0.0014 | -1.31 | Normal down vs > 5 Years Off IS Tolerant |

|                |                           |                                                                                            |        |       |                                          |
|----------------|---------------------------|--------------------------------------------------------------------------------------------|--------|-------|------------------------------------------|
| 203366_PM_at   | POLG                      | polymerase (DNA directed), gamma                                                           | 0.0014 | 1.27  | Normal up vs > 5 Years Off IS Tolerant   |
| 234934_PM_at   | ---                       | ---                                                                                        | 0.0014 | -1.52 | Normal down vs > 5 Years Off IS Tolerant |
| 229070_PM_at   | C6orf105                  | chromosome 6 open reading frame 105                                                        | 0.0014 | 3.34  | Normal up vs > 5 Years Off IS Tolerant   |
| 229501_PM_s_at | USP8                      | ubiquitin specific peptidase 8                                                             | 0.0014 | 1.52  | Normal up vs > 5 Years Off IS Tolerant   |
| 241785_PM_at   | ---                       | ---                                                                                        | 0.0014 | -1.38 | Normal down vs > 5 Years Off IS Tolerant |
| 206071_PM_s_at | EPHA3                     | EPH receptor A3                                                                            | 0.0014 | -1.26 | Normal down vs > 5 Years Off IS Tolerant |
| 204383_PM_at   | DGCR14                    | DiGeorge syndrome critical region gene 14                                                  | 0.0014 | 1.91  | Normal up vs > 5 Years Off IS Tolerant   |
| 225546_PM_at   | EEF2K                     | eukaryotic elongation factor-2 kinase                                                      | 0.0014 | 1.54  | Normal up vs > 5 Years Off IS Tolerant   |
| 227677_PM_at   | JAK3                      | Janus kinase 3                                                                             | 0.0014 | 1.54  | Normal up vs > 5 Years Off IS Tolerant   |
| 1556727_PM_at  | PRCD                      | progressive rod-cone degeneration                                                          | 0.0014 | -1.40 | Normal down vs > 5 Years Off IS Tolerant |
| 227047_PM_x_at | ZBTB4                     | zinc finger and BTB domain containing 4                                                    | 0.0014 | 1.41  | Normal up vs > 5 Years Off IS Tolerant   |
| 1556620_PM_at  | ---                       | ---                                                                                        | 0.0014 | -1.40 | Normal down vs > 5 Years Off IS Tolerant |
| 204698_PM_at   | ISG20                     | interferon stimulated exonuclease gene 20kDa                                               | 0.0014 | 1.71  | Normal up vs > 5 Years Off IS Tolerant   |
| 235308_PM_at   | ZBTB20                    | zinc finger and BTB domain containing 20                                                   | 0.0014 | 1.53  | Normal up vs > 5 Years Off IS Tolerant   |
| 226206_PM_at   | MAFK                      | v-maf musculoaponeurotic fibrosarcoma oncogene homolog K (avian)                           | 0.0014 | 1.81  | Normal up vs > 5 Years Off IS Tolerant   |
| 227248_PM_at   | PLEKHH3                   | pleckstrin homology domain containing, family H (with MyTH4 domain) member 3               | 0.0014 | -1.37 | Normal down vs > 5 Years Off IS Tolerant |
| 242699_PM_at   | ---                       | ---                                                                                        | 0.0014 | -1.33 | Normal down vs > 5 Years Off IS Tolerant |
| 219608_PM_s_at | FBXO38                    | F-box protein 38                                                                           | 0.0014 | -1.45 | Normal down vs > 5 Years Off IS Tolerant |
| 223596_PM_at   | SLC12A6                   | solute carrier family 12 (potassium/chloride transporters), member 6                       | 0.0015 | 2.44  | Normal up vs > 5 Years Off IS Tolerant   |
| 205140_PM_at   | FPGT                      | fucose-1-phosphate guanylyltransferase                                                     | 0.0015 | -2.06 | Normal down vs > 5 Years Off IS Tolerant |
| 204031_PM_s_at | PCBP2                     | poly(rC) binding protein 2                                                                 | 0.0015 | 1.28  | Normal up vs > 5 Years Off IS Tolerant   |
| 1562608_PM_at  | ---                       | ---                                                                                        | 0.0015 | -1.97 | Normal down vs > 5 Years Off IS Tolerant |
| 217779_PM_s_at | LOC100505603 ///<br>PNRC2 | proline-rich nuclear receptor coactivator 2-like ///<br>proline-rich nuclear receptor coac | 0.0015 | 1.27  | Normal up vs > 5 Years Off IS Tolerant   |
| 212310_PM_at   | MIA3                      | melanoma inhibitory activity family, member 3                                              | 0.0015 | 1.79  | Normal up vs > 5 Years Off IS Tolerant   |
| 1557835_PM_at  | ---                       | ---                                                                                        | 0.0015 | 1.96  | Normal up vs > 5 Years Off IS Tolerant   |
| 209315_PM_at   | HBS1L                     | HBS1-like ( <i>S. cerevisiae</i> )                                                         | 0.0015 | 1.85  | Normal up vs > 5 Years Off IS Tolerant   |

|                 |              |                                                                                  |        |       |                                          |
|-----------------|--------------|----------------------------------------------------------------------------------|--------|-------|------------------------------------------|
| 223015_PM_at    | EIF2A        | eukaryotic translation initiation factor 2A, 65kDa                               | 0.0015 | 1.27  | Normal up vs > 5 Years Off IS Tolerant   |
| 218252_PM_at    | CKAP2        | cytoskeleton associated protein 2                                                | 0.0015 | 1.96  | Normal up vs > 5 Years Off IS Tolerant   |
| 1555976_PM_s_at | ---          | ---                                                                              | 0.0015 | 1.94  | Normal up vs > 5 Years Off IS Tolerant   |
| 226369_PM_at    | LOC338799    | hypothetical LOC338799                                                           | 0.0015 | 1.72  | Normal up vs > 5 Years Off IS Tolerant   |
| 222259_PM_s_at  | SPO11        | SPO11 meiotic protein covalently bound to DSB homolog ( <i>S. cerevisiae</i> )   | 0.0015 | -1.34 | Normal down vs > 5 Years Off IS Tolerant |
| 224166_PM_at    | SLC25A2      | solute carrier family 25 (mitochondrial carrier; ornithine transporter) member 2 | 0.0015 | -1.33 | Normal down vs > 5 Years Off IS Tolerant |
| 200706_PM_s_at  | LITAF        | lipopolysaccharide-induced TNF factor                                            | 0.0015 | 1.68  | Normal up vs > 5 Years Off IS Tolerant   |
| 244395_PM_at    | FLJ41455     | hypothetical gene supported by AK123449; BX641014                                | 0.0015 | -2.03 | Normal down vs > 5 Years Off IS Tolerant |
| 208318_PM_s_at  | XYLB         | xylulokinase homolog ( <i>H. influenzae</i> )                                    | 0.0015 | -1.28 | Normal down vs > 5 Years Off IS Tolerant |
| 233299_PM_at    | RIMS4        | regulating synaptic membrane exocytosis 4                                        | 0.0015 | -1.37 | Normal down vs > 5 Years Off IS Tolerant |
| 121_PM_at       | PAX8         | paired box 8                                                                     | 0.0015 | -1.59 | Normal down vs > 5 Years Off IS Tolerant |
| 231218_PM_at    | ---          | ---                                                                              | 0.0015 | 1.50  | Normal up vs > 5 Years Off IS Tolerant   |
| 221702_PM_s_at  | TM2D3        | TM2 domain containing 3                                                          | 0.0015 | 1.68  | Normal up vs > 5 Years Off IS Tolerant   |
| 220246_PM_at    | CAMK1D       | calcium/calmodulin-dependent protein kinase ID                                   | 0.0015 | 1.89  | Normal up vs > 5 Years Off IS Tolerant   |
| 1552323_PM_s_at | FAM122C      | family with sequence similarity 122C                                             | 0.0015 | 1.90  | Normal up vs > 5 Years Off IS Tolerant   |
| 1567248_PM_at   | OR9A1P       | olfactory receptor, family 9, subfamily A, member 1 pseudogene                   | 0.0015 | -1.29 | Normal down vs > 5 Years Off IS Tolerant |
| 233066_PM_at    | ---          | ---                                                                              | 0.0015 | -1.70 | Normal down vs > 5 Years Off IS Tolerant |
| 224285_PM_at    | GPR174       | G protein-coupled receptor 174                                                   | 0.0015 | 1.41  | Normal up vs > 5 Years Off IS Tolerant   |
| 240185_PM_at    | LOC100147773 | hypothetical LOC100147773                                                        | 0.0015 | -1.34 | Normal down vs > 5 Years Off IS Tolerant |
| 218575_PM_at    | ANAPC1       | anaphase promoting complex subunit 1                                             | 0.0015 | 1.70  | Normal up vs > 5 Years Off IS Tolerant   |
| 218116_PM_at    | C9orf78      | chromosome 9 open reading frame 78                                               | 0.0015 | 1.64  | Normal up vs > 5 Years Off IS Tolerant   |
| 240231_PM_at    | ---          | ---                                                                              | 0.0015 | 2.22  | Normal up vs > 5 Years Off IS Tolerant   |
| 226052_PM_at    | BRD4         | bromodomain containing 4                                                         | 0.0015 | 1.22  | Normal up vs > 5 Years Off IS Tolerant   |
| 201016_PM_at    | EIF1AX       | eukaryotic translation initiation factor 1A, X-linked                            | 0.0015 | 2.26  | Normal up vs > 5 Years Off IS Tolerant   |
| 217819_PM_at    | GOLGA7       | golgin A7                                                                        | 0.0015 | 1.33  | Normal up vs > 5 Years Off IS Tolerant   |
| 231120_PM_x_at  | PKIB         | protein kinase (cAMP-dependent, catalytic) inhibitor beta                        | 0.0015 | -1.45 | Normal down vs > 5 Years Off IS Tolerant |
| 237264_PM_at    | ---          | ---                                                                              | 0.0015 | -1.82 | Normal down vs > 5 Years Off IS Tolerant |

|                 |              |                                                                    |        |       |                                          |
|-----------------|--------------|--------------------------------------------------------------------|--------|-------|------------------------------------------|
| 219943_PM_s_at  | USP46        | ubiquitin specific peptidase 46                                    | 0.0015 | -1.53 | Normal down vs > 5 Years Off IS Tolerant |
| 208456_PM_s_at  | RRAS2        | related RAS viral (r-ras) oncogene homolog 2                       | 0.0015 | 2.25  | Normal up vs > 5 Years Off IS Tolerant   |
| 204507_PM_s_at  | PPP3R1       | protein phosphatase 3, regulatory subunit B, alpha                 | 0.0015 | 2.56  | Normal up vs > 5 Years Off IS Tolerant   |
| 239097_PM_at    | C9orf4       | chromosome 9 open reading frame 4                                  | 0.0015 | -1.56 | Normal down vs > 5 Years Off IS Tolerant |
| 239775_PM_at    | ---          | ---                                                                | 0.0015 | 1.79  | Normal up vs > 5 Years Off IS Tolerant   |
| 224746_PM_at    | KIAA1522     | KIAA1522                                                           | 0.0015 | -1.45 | Normal down vs > 5 Years Off IS Tolerant |
| 238979_PM_at    | LOC100505606 | hypothetical LOC100505606                                          | 0.0015 | -1.39 | Normal down vs > 5 Years Off IS Tolerant |
| 229483_PM_at    | ---          | ---                                                                | 0.0015 | 1.75  | Normal up vs > 5 Years Off IS Tolerant   |
| 1560654_PM_at   | FLJ37201     | tigger transposable element derived 2 pseudogene                   | 0.0015 | -1.62 | Normal down vs > 5 Years Off IS Tolerant |
| 223470_PM_at    | PIGM         | phosphatidylinositol glycan anchor biosynthesis, class M           | 0.0015 | -1.82 | Normal down vs > 5 Years Off IS Tolerant |
| 212187_PM_x_at  | PTGDS        | prostaglandin D2 synthase 21kDa (brain)                            | 0.0015 | 2.74  | Normal up vs > 5 Years Off IS Tolerant   |
| 208440_PM_at    | C3orf27      | chromosome 3 open reading frame 27                                 | 0.0015 | -1.29 | Normal down vs > 5 Years Off IS Tolerant |
| 200844_PM_s_at  | PRDX6        | peroxiredoxin 6                                                    | 0.0015 | 1.42  | Normal up vs > 5 Years Off IS Tolerant   |
| 229098_PM_s_at  | C5orf24      | Chromosome 5 open reading frame 24                                 | 0.0015 | -1.31 | Normal down vs > 5 Years Off IS Tolerant |
| 216538_PM_at    | ---          | ---                                                                | 0.0015 | 1.69  | Normal up vs > 5 Years Off IS Tolerant   |
| 216769_PM_x_at  | ---          | ---                                                                | 0.0015 | -1.47 | Normal down vs > 5 Years Off IS Tolerant |
| 232914_PM_s_at  | SYTL2        | synaptotagmin-like 2                                               | 0.0015 | 2.50  | Normal up vs > 5 Years Off IS Tolerant   |
| 1569722_PM_s_at | LOC219731    | hypothetical LOC219731                                             | 0.0015 | -1.28 | Normal down vs > 5 Years Off IS Tolerant |
| 233274_PM_at    | ---          | ---                                                                | 0.0015 | 1.51  | Normal up vs > 5 Years Off IS Tolerant   |
| 211438_PM_at    | TRHR         | thyrotropin-releasing hormone receptor                             | 0.0015 | -1.56 | Normal down vs > 5 Years Off IS Tolerant |
| 207956_PM_x_at  | PDS5B        | PDS5, regulator of cohesion maintenance, homolog B (S. cerevisiae) | 0.0015 | 1.36  | Normal up vs > 5 Years Off IS Tolerant   |
| 244831_PM_at    | ---          | ---                                                                | 0.0015 | -1.35 | Normal down vs > 5 Years Off IS Tolerant |
| 202002_PM_at    | ACAA2        | acetyl-CoA acyltransferase 2                                       | 0.0015 | -1.70 | Normal down vs > 5 Years Off IS Tolerant |
| 201908_PM_at    | DVL3         | dishevelled, dsh homolog 3 (Drosophila)                            | 0.0015 | 1.59  | Normal up vs > 5 Years Off IS Tolerant   |
| 209538_PM_at    | ZNF32        | zinc finger protein 32                                             | 0.0015 | 1.73  | Normal up vs > 5 Years Off IS Tolerant   |

|                 |           |                                                                                      |        |       |                                          |
|-----------------|-----------|--------------------------------------------------------------------------------------|--------|-------|------------------------------------------|
| 226988_PM_s_at  | MYH14     | myosin, heavy chain 14, non-muscle                                                   | 0.0015 | -1.34 | Normal down vs > 5 Years Off IS Tolerant |
| 236294_PM_at    | HUWE1     | HECT, UBA and WWE domain containing 1                                                | 0.0015 | 1.48  | Normal up vs > 5 Years Off IS Tolerant   |
| 231991_PM_at    | C20orf160 | chromosome 20 open reading frame 160                                                 | 0.0015 | -1.42 | Normal down vs > 5 Years Off IS Tolerant |
| 214049_PM_x_at  | CD7       | CD7 molecule                                                                         | 0.0015 | 1.48  | Normal up vs > 5 Years Off IS Tolerant   |
| 227006_PM_at    | PPP1R14A  | protein phosphatase 1, regulatory (inhibitor) subunit 14A                            | 0.0015 | 1.66  | Normal up vs > 5 Years Off IS Tolerant   |
| 216193_PM_at    | ---       | ---                                                                                  | 0.0015 | -1.75 | Normal down vs > 5 Years Off IS Tolerant |
| 219172_PM_at    | UBTD1     | ubiquitin domain containing 1                                                        | 0.0015 | -1.41 | Normal down vs > 5 Years Off IS Tolerant |
| 1556352_PM_at   | ---       | ---                                                                                  | 0.0015 | -2.27 | Normal down vs > 5 Years Off IS Tolerant |
| 214142_PM_at    | ZG16      | zymogen granule protein 16 homolog (rat)                                             | 0.0015 | -1.29 | Normal down vs > 5 Years Off IS Tolerant |
| 233928_PM_at    | ---       | ---                                                                                  | 0.0016 | -1.35 | Normal down vs > 5 Years Off IS Tolerant |
| 238835_PM_at    | ---       | ---                                                                                  | 0.0016 | -1.45 | Normal down vs > 5 Years Off IS Tolerant |
| 233393_PM_at    | ---       | ---                                                                                  | 0.0016 | 1.48  | Normal up vs > 5 Years Off IS Tolerant   |
| 221271_PM_at    | IL21      | interleukin 21                                                                       | 0.0016 | -1.37 | Normal down vs > 5 Years Off IS Tolerant |
| 201566_PM_x_at  | ID2       | inhibitor of DNA binding 2, dominant negative helix-loop-helix protein               | 0.0016 | 1.56  | Normal up vs > 5 Years Off IS Tolerant   |
| 202976_PM_s_at  | RHOBTB3   | Rho-related BTB domain containing 3                                                  | 0.0016 | 1.97  | Normal up vs > 5 Years Off IS Tolerant   |
| 1555427_PM_s_at | SYNCRIP   | synaptotagmin binding, cytoplasmic RNA interacting protein                           | 0.0016 | 1.64  | Normal up vs > 5 Years Off IS Tolerant   |
| 1569876_PM_at   | C17orf57  | chromosome 17 open reading frame 57                                                  | 0.0016 | -1.41 | Normal down vs > 5 Years Off IS Tolerant |
| 1558720_PM_at   | ---       | ---                                                                                  | 0.0016 | -1.43 | Normal down vs > 5 Years Off IS Tolerant |
| 202098_PM_s_at  | PRMT2     | protein arginine methyltransferase 2                                                 | 0.0016 | 1.79  | Normal up vs > 5 Years Off IS Tolerant   |
| 216600_PM_x_at  | ALDOB     | Aldolase B, fructose-bisphosphate                                                    | 0.0016 | -1.47 | Normal down vs > 5 Years Off IS Tolerant |
| 213505_PM_s_at  | SUGP2     | SURP and G patch domain containing 2                                                 | 0.0016 | 1.40  | Normal up vs > 5 Years Off IS Tolerant   |
| 226290_PM_at    | BDP1      | B double prime 1, subunit of RNA polymerase III transcription initiation factor IIIB | 0.0016 | 1.63  | Normal up vs > 5 Years Off IS Tolerant   |

|                |                           |                                                                                        |        |       |                                          |
|----------------|---------------------------|----------------------------------------------------------------------------------------|--------|-------|------------------------------------------|
| 212715_PM_s_at | MICAL3                    | microtubule associated monooxygenase, calponin and LIM domain containing 3             | 0.0016 | 2.02  | Normal up vs > 5 Years Off IS Tolerant   |
| 203788_PM_s_at | SEMA3C                    | sema domain, immunoglobulin domain (Ig), short basic domain, secreted, (semaphorin) 3C | 0.0016 | -1.33 | Normal down vs > 5 Years Off IS Tolerant |
| 214709_PM_s_at | KTN1                      | kinectin 1 (kinesin receptor)                                                          | 0.0016 | 1.26  | Normal up vs > 5 Years Off IS Tolerant   |
| 212885_PM_at   | MPHOSPH10                 | M-phase phosphoprotein 10 (U3 small nucleolar ribonucleoprotein)                       | 0.0016 | 1.56  | Normal up vs > 5 Years Off IS Tolerant   |
| 229895_PM_s_at | NCK1                      | NCK adaptor protein 1                                                                  | 0.0016 | -1.65 | Normal down vs > 5 Years Off IS Tolerant |
| 238373_PM_at   | H1FNT                     | H1 histone family, member N, testis-specific                                           | 0.0016 | -1.28 | Normal down vs > 5 Years Off IS Tolerant |
| 239285_PM_at   | ---                       | ---                                                                                    | 0.0016 | 2.02  | Normal up vs > 5 Years Off IS Tolerant   |
| 227880_PM_s_at | LOC100506205 /// TMEM185A | transmembrane protein 185A-like /// transmembrane protein 185A                         | 0.0016 | 1.80  | Normal up vs > 5 Years Off IS Tolerant   |
| 220423_PM_at   | PLA2G2D                   | phospholipase A2, group IID                                                            | 0.0016 | -1.36 | Normal down vs > 5 Years Off IS Tolerant |
| 220106_PM_at   | NPC1L1                    | NPC1 (Niemann-Pick disease, type C1, gene)-like 1                                      | 0.0016 | -1.26 | Normal down vs > 5 Years Off IS Tolerant |
| 240423_PM_at   | LOC441204                 | hypothetical locus LOC441204                                                           | 0.0016 | -1.32 | Normal down vs > 5 Years Off IS Tolerant |
| 227212_PM_s_at | PHF19                     | PHD finger protein 19                                                                  | 0.0016 | 2.19  | Normal up vs > 5 Years Off IS Tolerant   |
| 227593_PM_at   | FLJ37453                  | hypothetical LOC729614                                                                 | 0.0016 | 1.64  | Normal up vs > 5 Years Off IS Tolerant   |
| 1557285_PM_at  | AREGB                     | Amphiregulin B                                                                         | 0.0016 | 4.70  | Normal up vs > 5 Years Off IS Tolerant   |
| 222481_PM_at   | FXC1                      | fracture callus 1 homolog (rat)                                                        | 0.0016 | 1.59  | Normal up vs > 5 Years Off IS Tolerant   |
| 203633_PM_at   | CPT1A                     | carnitine palmitoyltransferase 1A (liver)                                              | 0.0016 | -1.65 | Normal down vs > 5 Years Off IS Tolerant |
| 240492_PM_at   | ---                       | ---                                                                                    | 0.0016 | -1.38 | Normal down vs > 5 Years Off IS Tolerant |
| 202828_PM_s_at | MMP14                     | matrix metalloproteinase 14 (membrane-inserted)                                        | 0.0016 | -1.60 | Normal down vs > 5 Years Off IS Tolerant |
| 1561310_PM_at  | ---                       | ---                                                                                    | 0.0016 | -1.51 | Normal down vs > 5 Years Off IS Tolerant |
| 1566569_PM_at  | ---                       | ---                                                                                    | 0.0016 | -1.45 | Normal down vs > 5 Years Off IS Tolerant |
| 233098_PM_s_at | EPB41L4B                  | erythrocyte membrane protein band 4.1 like 4B                                          | 0.0016 | -1.27 | Normal down vs > 5 Years Off IS Tolerant |
| 1557771_PM_at  | FHAD1                     | forkhead-associated (FHA) phosphopeptide binding domain 1                              | 0.0016 | -1.27 | Normal down vs > 5 Years Off IS Tolerant |



|                |                           |                                                                                         |        |       |                                          |
|----------------|---------------------------|-----------------------------------------------------------------------------------------|--------|-------|------------------------------------------|
| 230938_PM_x_at | ATF5                      | activating transcription factor 5                                                       | 0.0016 | -1.60 | Normal down vs > 5 Years Off IS Tolerant |
| 238125_PM_at   | ADAMTS16                  | ADAM metallopeptidase with thrombospondin type 1 motif, 16                              | 0.0016 | -1.31 | Normal down vs > 5 Years Off IS Tolerant |
| 203915_PM_at   | CXCL9                     | chemokine (C-X-C motif) ligand 9                                                        | 0.0016 | -1.59 | Normal down vs > 5 Years Off IS Tolerant |
| 1559600_PM_at  | ---                       | ---                                                                                     | 0.0016 | -1.70 | Normal down vs > 5 Years Off IS Tolerant |
| 212578_PM_x_at | LOC100505503 ///<br>RPS17 | 40S ribosomal protein S17-like /// ribosomal protein S17                                | 0.0016 | 1.22  | Normal up vs > 5 Years Off IS Tolerant   |
| 203049_PM_s_at | TTC37                     | tetratricopeptide repeat domain 37                                                      | 0.0016 | 1.72  | Normal up vs > 5 Years Off IS Tolerant   |
| 228348_PM_at   | LINS                      | lines homolog (Drosophila)                                                              | 0.0016 | 1.90  | Normal up vs > 5 Years Off IS Tolerant   |
| 201663_PM_s_at | SMC4                      | structural maintenance of chromosomes 4                                                 | 0.0016 | 1.93  | Normal up vs > 5 Years Off IS Tolerant   |
| 1561293_PM_at  | LOC100287584              | Hypothetical protein LOC100287584                                                       | 0.0016 | -1.49 | Normal down vs > 5 Years Off IS Tolerant |
| 225693_PM_s_at | CAMTA1                    | calmodulin binding transcription activator 1                                            | 0.0016 | 1.40  | Normal up vs > 5 Years Off IS Tolerant   |
| 1552876_PM_at  | C21orf89                  | chromosome 21 open reading frame 89                                                     | 0.0016 | -1.46 | Normal down vs > 5 Years Off IS Tolerant |
| 239710_PM_at   | FIGN                      | fidgetin                                                                                | 0.0016 | -1.55 | Normal down vs > 5 Years Off IS Tolerant |
| 229426_PM_at   | COX5A                     | cytochrome c oxidase subunit Va                                                         | 0.0016 | 1.64  | Normal up vs > 5 Years Off IS Tolerant   |
| 211071_PM_s_at | MLLT11                    | myeloid/lymphoid or mixed-lineage leukemia (trithorax homolog, Drosophila); translocate | 0.0016 | 1.68  | Normal up vs > 5 Years Off IS Tolerant   |
| 236134_PM_at   | DCAF7                     | DDB1 and CUL4 associated factor 7                                                       | 0.0016 | 1.70  | Normal up vs > 5 Years Off IS Tolerant   |
| 225969_PM_at   | ALKBH6                    | alkB, alkylation repair homolog 6 (E. coli)                                             | 0.0016 | 1.64  | Normal up vs > 5 Years Off IS Tolerant   |
| 210296_PM_s_at | PEX2                      | peroxisomal biogenesis factor 2                                                         | 0.0016 | 1.75  | Normal up vs > 5 Years Off IS Tolerant   |
| 223267_PM_at   | RG9MTD1                   | RNA (guanine-9-) methyltransferase domain containing 1                                  | 0.0016 | 2.08  | Normal up vs > 5 Years Off IS Tolerant   |
| 201287_PM_s_at | SDC1                      | syndecan 1                                                                              | 0.0016 | -1.27 | Normal down vs > 5 Years Off IS Tolerant |
| 244211_PM_at   | ---                       | ---                                                                                     | 0.0016 | -1.47 | Normal down vs > 5 Years Off IS Tolerant |
| 207577_PM_at   | HTR4                      | 5-hydroxytryptamine (serotonin) receptor 4                                              | 0.0016 | -1.48 | Normal down vs > 5 Years Off IS Tolerant |
| 221392_PM_at   | TAS2R4                    | taste receptor, type 2, member 4                                                        | 0.0016 | -1.57 | Normal down vs > 5 Years Off IS Tolerant |
| 221682_PM_s_at | PCDHGB6                   | protocadherin gamma subfamily B, 6                                                      | 0.0016 | -1.57 | Normal down vs > 5 Years Off IS Tolerant |
| 200622_PM_x_at | CALM3                     | calmodulin 3 (phosphorylase kinase, delta)                                              | 0.0016 | 1.53  | Normal up vs > 5 Years Off IS Tolerant   |

|                 |                                                                             |                                                                                           |        |       |                                          |
|-----------------|-----------------------------------------------------------------------------|-------------------------------------------------------------------------------------------|--------|-------|------------------------------------------|
| 227696_PM_at    | LOC100271836 ///<br>LOC440354 ///<br>LOC595101 ///<br>LOC641298 ///<br>SMG1 | SMG1 homolog, phosphatidylinositol 3-kinase-related kinase pseudogene /// PI-3-kinase-r   | 0.0016 | 1.59  | Normal up vs > 5 Years Off IS Tolerant   |
| 214958_PM_s_at  | TMC6                                                                        | transmembrane channel-like 6                                                              | 0.0016 | 1.54  | Normal up vs > 5 Years Off IS Tolerant   |
| 215485_PM_s_at  | ICAM1                                                                       | intercellular adhesion molecule 1                                                         | 0.0016 | 2.33  | Normal up vs > 5 Years Off IS Tolerant   |
| 213356_PM_x_at  | HNRNPA1 ///<br>HNRNPA1L2 ///<br>HNRNPA1P10                                  | heterogeneous nuclear ribonucleoprotein A1 ///<br>heterogeneous nuclear ribonucleoprotein | 0.0016 | 1.13  | Normal up vs > 5 Years Off IS Tolerant   |
| 219072_PM_at    | BCL7C                                                                       | B-cell CLL/lymphoma 7C                                                                    | 0.0016 | 1.49  | Normal up vs > 5 Years Off IS Tolerant   |
| 204924_PM_at    | TLR2                                                                        | toll-like receptor 2                                                                      | 0.0016 | -1.68 | Normal down vs > 5 Years Off IS Tolerant |
| 202585_PM_s_at  | NFX1                                                                        | nuclear transcription factor, X-box binding 1                                             | 0.0016 | 1.75  | Normal up vs > 5 Years Off IS Tolerant   |
| 1554876_PM_a_at | S100Z                                                                       | S100 calcium binding protein Z                                                            | 0.0016 | -2.07 | Normal down vs > 5 Years Off IS Tolerant |
| 244865_PM_at    | ---                                                                         | ---                                                                                       | 0.0017 | 1.97  | Normal up vs > 5 Years Off IS Tolerant   |
| 235556_PM_at    | C5orf41                                                                     | chromosome 5 open reading frame 41                                                        | 0.0017 | 1.53  | Normal up vs > 5 Years Off IS Tolerant   |
| 1557146_PM_a_at | LOC146336                                                                   | hypothetical LOC146336                                                                    | 0.0017 | -1.37 | Normal down vs > 5 Years Off IS Tolerant |
| 1565671_PM_a_at | LOC100287911                                                                | Similar to hCG2024922                                                                     | 0.0017 | -1.27 | Normal down vs > 5 Years Off IS Tolerant |
| 207431_PM_s_at  | DEGS1                                                                       | degenerative spermatocyte homolog 1, lipid desaturase (Drosophila)                        | 0.0017 | 2.21  | Normal up vs > 5 Years Off IS Tolerant   |
| 1562259_PM_at   | TEX9                                                                        | testis expressed 9                                                                        | 0.0017 | -1.51 | Normal down vs > 5 Years Off IS Tolerant |
| 242007_PM_at    | ---                                                                         | ---                                                                                       | 0.0017 | -1.90 | Normal down vs > 5 Years Off IS Tolerant |
| 233500_PM_x_at  | CLEC2D                                                                      | C-type lectin domain family 2, member D                                                   | 0.0017 | 1.81  | Normal up vs > 5 Years Off IS Tolerant   |
| 203118_PM_at    | PCSK7                                                                       | proprotein convertase subtilisin/kexin type 7                                             | 0.0017 | 1.46  | Normal up vs > 5 Years Off IS Tolerant   |
| 234472_PM_at    | GALNT13                                                                     | UDP-N-acetyl-alpha-D-galactosamine:polypeptide N-acetylgalactosaminyltransferase 13 (Ga   | 0.0017 | -1.93 | Normal down vs > 5 Years Off IS Tolerant |
| 213733_PM_at    | MYO1F                                                                       | myosin IF                                                                                 | 0.0017 | -1.38 | Normal down vs > 5 Years Off IS Tolerant |
| 1553078_PM_at   | OR5P3                                                                       | olfactory receptor, family 5, subfamily P, member 3                                       | 0.0017 | -1.52 | Normal down vs > 5 Years Off IS Tolerant |
| 218404_PM_at    | SNX10                                                                       | sorting nexin 10                                                                          | 0.0017 | -1.47 | Normal down vs > 5 Years Off IS Tolerant |
| 210118_PM_s_at  | IL1A                                                                        | interleukin 1, alpha                                                                      | 0.0017 | 5.99  | Normal up vs > 5 Years Off IS Tolerant   |

|                 |              |                                                                 |        |       |                                          |
|-----------------|--------------|-----------------------------------------------------------------|--------|-------|------------------------------------------|
| 228626_PM_at    | ---          | ---                                                             | 0.0017 | 1.48  | Normal up vs > 5 Years Off IS Tolerant   |
| 208332_PM_at    | PRY /// PRY2 | PTPN13-like, Y-linked /// PTPN13-like, Y-linked 2               | 0.0017 | -1.79 | Normal down vs > 5 Years Off IS Tolerant |
| 244564_PM_at    | FLJ37638     | Hypothetical gene supported by AK094957                         | 0.0017 | -1.41 | Normal down vs > 5 Years Off IS Tolerant |
| 222862_PM_s_at  | AK5          | adenylate kinase 5                                              | 0.0017 | 3.00  | Normal up vs > 5 Years Off IS Tolerant   |
| 204484_PM_at    | PIK3C2B      | phosphoinositide-3-kinase, class 2, beta polypeptide            | 0.0017 | 1.85  | Normal up vs > 5 Years Off IS Tolerant   |
| 201636_PM_at    | FXR1         | fragile X mental retardation, autosomal homolog 1               | 0.0017 | 1.34  | Normal up vs > 5 Years Off IS Tolerant   |
| 202361_PM_at    | SEC24C       | SEC24 family, member C ( <i>S. cerevisiae</i> )                 | 0.0017 | 1.43  | Normal up vs > 5 Years Off IS Tolerant   |
| 214717_PM_at    | PK155        | hypothetical protein DKFZp434H1419                              | 0.0017 | 1.60  | Normal up vs > 5 Years Off IS Tolerant   |
| 214604_PM_at    | HOXD11       | homeobox D11                                                    | 0.0017 | -1.28 | Normal down vs > 5 Years Off IS Tolerant |
| 206614_PM_at    | GDF5         | growth differentiation factor 5                                 | 0.0017 | -1.43 | Normal down vs > 5 Years Off IS Tolerant |
| 1552686_PM_at   | C20orf152    | chromosome 20 open reading frame 152                            | 0.0017 | -1.45 | Normal down vs > 5 Years Off IS Tolerant |
| 212599_PM_at    | AUTS2        | autism susceptibility candidate 2                               | 0.0017 | 2.48  | Normal up vs > 5 Years Off IS Tolerant   |
| 238929_PM_at    | SRSF8        | serine/arginine-rich splicing factor 8                          | 0.0017 | 1.88  | Normal up vs > 5 Years Off IS Tolerant   |
| 213525_PM_at    | ---          | ---                                                             | 0.0017 | -1.32 | Normal down vs > 5 Years Off IS Tolerant |
| 224639_PM_at    | SPPL3        | signal peptide peptidase 3                                      | 0.0017 | 1.30  | Normal up vs > 5 Years Off IS Tolerant   |
| 222244_PM_s_at  | TUG1         | taurine upregulated 1 (non-protein coding)                      | 0.0017 | 1.33  | Normal up vs > 5 Years Off IS Tolerant   |
| 217283_PM_at    | ---          | ---                                                             | 0.0017 | -1.35 | Normal down vs > 5 Years Off IS Tolerant |
| 213327_PM_s_at  | USP12        | ubiquitin specific peptidase 12                                 | 0.0017 | 1.72  | Normal up vs > 5 Years Off IS Tolerant   |
| 217466_PM_x_at  | RPS2         | ribosomal protein S2                                            | 0.0017 | 1.33  | Normal up vs > 5 Years Off IS Tolerant   |
| 234156_PM_at    | ---          | ---                                                             | 0.0017 | -1.75 | Normal down vs > 5 Years Off IS Tolerant |
| 1556321_PM_a_at | ---          | ---                                                             | 0.0017 | 2.30  | Normal up vs > 5 Years Off IS Tolerant   |
| 222999_PM_s_at  | CCNL2        | cyclin L2                                                       | 0.0017 | 1.44  | Normal up vs > 5 Years Off IS Tolerant   |
| 215670_PM_s_at  | SCAND2       | SCAN domain containing 2 pseudogene                             | 0.0017 | 1.53  | Normal up vs > 5 Years Off IS Tolerant   |
| 201150_PM_s_at  | TIMP3        | TIMP metallopeptidase inhibitor 3                               | 0.0017 | -1.28 | Normal down vs > 5 Years Off IS Tolerant |
| 240044_PM_x_at  | TNRC6B       | Trinucleotide repeat containing 6B                              | 0.0017 | 1.76  | Normal up vs > 5 Years Off IS Tolerant   |
| 202703_PM_at    | DUSP11       | dual specificity phosphatase 11 (RNA/RNP complex 1-interacting) | 0.0017 | 1.61  | Normal up vs > 5 Years Off IS Tolerant   |
| 214744_PM_s_at  | RPL23        | ribosomal protein L23                                           | 0.0017 | 1.83  | Normal up vs > 5 Years Off IS Tolerant   |
| 243492_PM_at    | THEM4        | thioesterase superfamily member 4                               | 0.0017 | 1.84  | Normal up vs > 5 Years Off IS Tolerant   |
| 225534_PM_at    | C8orf40      | chromosome 8 open reading frame 40                              | 0.0017 | 1.62  | Normal up vs > 5 Years Off IS Tolerant   |

|                 |           |                                                       |        |       |                                          |
|-----------------|-----------|-------------------------------------------------------|--------|-------|------------------------------------------|
| 1557690_PM_x_at | ---       | ---                                                   | 0.0017 | -1.37 | Normal down vs > 5 Years Off IS Tolerant |
| 222001_PM_x_at  | LOC728855 | hypothetical LOC728855                                | 0.0017 | 1.61  | Normal up vs > 5 Years Off IS Tolerant   |
| 218480_PM_at    | AGBL5     | ATP/GTP binding protein-like 5                        | 0.0017 | 1.46  | Normal up vs > 5 Years Off IS Tolerant   |
| 200772_PM_x_at  | PTMA      | prothymosin, alpha                                    | 0.0017 | 1.14  | Normal up vs > 5 Years Off IS Tolerant   |
| 229073_PM_at    | PRTG      | protogenin                                            | 0.0017 | -1.39 | Normal down vs > 5 Years Off IS Tolerant |
| 238083_PM_at    | PARP10    | poly (ADP-ribose) polymerase family, member 10        | 0.0017 | -1.45 | Normal down vs > 5 Years Off IS Tolerant |
| 1554067_PM_at   | C12orf66  | chromosome 12 open reading frame 66                   | 0.0017 | 1.96  | Normal up vs > 5 Years Off IS Tolerant   |
| 1562849_PM_at   | ---       | ---                                                   | 0.0017 | -1.48 | Normal down vs > 5 Years Off IS Tolerant |
| 200674_PM_s_at  | RPL32     | ribosomal protein L32                                 | 0.0017 | 1.14  | Normal up vs > 5 Years Off IS Tolerant   |
| 200091_PM_s_at  | RPS25     | ribosomal protein S25                                 | 0.0017 | 1.21  | Normal up vs > 5 Years Off IS Tolerant   |
| 228569_PM_at    | PAPOLA    | poly(A) polymerase alpha                              | 0.0017 | 1.76  | Normal up vs > 5 Years Off IS Tolerant   |
| 236423_PM_at    | ---       | ---                                                   | 0.0017 | -1.50 | Normal down vs > 5 Years Off IS Tolerant |
| 211585_PM_at    | NPAT      | nuclear protein, ataxia-telangiectasia locus          | 0.0017 | -3.01 | Normal down vs > 5 Years Off IS Tolerant |
| 220413_PM_at    | SLC39A2   | solute carrier family 39 (zinc transporter), member 2 | 0.0017 | -1.39 | Normal down vs > 5 Years Off IS Tolerant |
| 241858_PM_at    | ---       | ---                                                   | 0.0017 | -1.40 | Normal down vs > 5 Years Off IS Tolerant |
| 206207_PM_at    | CLC       | Charcot-Leyden crystal protein                        | 0.0017 | -1.83 | Normal down vs > 5 Years Off IS Tolerant |
| 231976_PM_at    | LINS      | lines homolog (Drosophila)                            | 0.0017 | 1.84  | Normal up vs > 5 Years Off IS Tolerant   |
| 213602_PM_s_at  | MMP11     | Matrix metalloproteinase 11 (stromelysin 3)           | 0.0017 | -1.35 | Normal down vs > 5 Years Off IS Tolerant |
| 208131_PM_s_at  | PTGIS     | prostaglandin I2 (prostacyclin) synthase              | 0.0017 | -1.49 | Normal down vs > 5 Years Off IS Tolerant |
| 200893_PM_at    | TRA2B     | transformer 2 beta homolog (Drosophila)               | 0.0017 | 1.27  | Normal up vs > 5 Years Off IS Tolerant   |
| 242735_PM_x_at  | ELF2      | E74-like factor 2 (ets domain transcription factor)   | 0.0017 | 1.45  | Normal up vs > 5 Years Off IS Tolerant   |
| 242433_PM_at    | ZBTB11    | zinc finger and BTB domain containing 11              | 0.0017 | 2.16  | Normal up vs > 5 Years Off IS Tolerant   |
| 238961_PM_s_at  | FNDC3A    | Fibronectin type III domain containing 3A             | 0.0017 | -1.42 | Normal down vs > 5 Years Off IS Tolerant |
| 207525_PM_s_at  | GIPC1     | GIPC PDZ domain containing family, member 1           | 0.0017 | 1.39  | Normal up vs > 5 Years Off IS Tolerant   |
| 1564295_PM_at   | FLJ25917  | hypothetical LOC401585                                | 0.0017 | -1.22 | Normal down vs > 5 Years Off IS Tolerant |

|                 |                  |                                                                                    |        |       |                                          |
|-----------------|------------------|------------------------------------------------------------------------------------|--------|-------|------------------------------------------|
| 219796_PM_s_at  | CDHR5            | cadherin-related family member 5                                                   | 0.0017 | -1.36 | Normal down vs > 5 Years Off IS Tolerant |
| 1553467_PM_at   | FLJ32742         | hypothetical locus FLJ32742                                                        | 0.0017 | -1.35 | Normal down vs > 5 Years Off IS Tolerant |
| 201021_PM_s_at  | DSTN             | destrin (actin depolymerizing factor)                                              | 0.0017 | 1.59  | Normal up vs > 5 Years Off IS Tolerant   |
| 1564372_PM_s_at | CASC2            | cancer susceptibility candidate 2                                                  | 0.0017 | -2.25 | Normal down vs > 5 Years Off IS Tolerant |
| 224845_PM_s_at  | SLAIN2           | SLAIN motif family, member 2                                                       | 0.0017 | 1.61  | Normal up vs > 5 Years Off IS Tolerant   |
| 203384_PM_s_at  | GOLGA1           | golgin A1                                                                          | 0.0018 | 1.54  | Normal up vs > 5 Years Off IS Tolerant   |
| 1566923_PM_at   | ---              | ---                                                                                | 0.0018 | -1.77 | Normal down vs > 5 Years Off IS Tolerant |
| 227378_PM_x_at  | C16orf13         | chromosome 16 open reading frame 13                                                | 0.0018 | 1.49  | Normal up vs > 5 Years Off IS Tolerant   |
| 213418_PM_at    | HSPA6            | heat shock 70kDa protein 6 (HSP70B')                                               | 0.0018 | -2.56 | Normal down vs > 5 Years Off IS Tolerant |
| 226061_PM_s_at  | NUDT3            | Nudix (nucleoside diphosphate linked moiety X)-type motif 3                        | 0.0018 | -1.42 | Normal down vs > 5 Years Off IS Tolerant |
| 1560034_PM_a_at | ---              | ---                                                                                | 0.0018 | -1.70 | Normal down vs > 5 Years Off IS Tolerant |
| 1555051_PM_at   | C10orf53         | chromosome 10 open reading frame 53                                                | 0.0018 | -1.30 | Normal down vs > 5 Years Off IS Tolerant |
| 216012_PM_at    | ---              | ---                                                                                | 0.0018 | -1.76 | Normal down vs > 5 Years Off IS Tolerant |
| 216204_PM_at    | COMT             | Catechol-O-methyltransferase                                                       | 0.0018 | -1.42 | Normal down vs > 5 Years Off IS Tolerant |
| 228752_PM_at    | EFCAB4B          | EF-hand calcium binding domain 4B                                                  | 0.0018 | 1.83  | Normal up vs > 5 Years Off IS Tolerant   |
| 205291_PM_at    | IL2RB            | interleukin 2 receptor, beta                                                       | 0.0018 | 2.09  | Normal up vs > 5 Years Off IS Tolerant   |
| 207215_PM_at    | GSTT1 /// GSTTP1 | glutathione S-transferase theta 1 /// glutathione S-transferase theta pseudogene 1 | 0.0018 | -1.39 | Normal down vs > 5 Years Off IS Tolerant |
| 206666_PM_at    | GZMK             | granzyme K (granzyme 3; tryptase II)                                               | 0.0018 | 3.00  | Normal up vs > 5 Years Off IS Tolerant   |
| 241429_PM_at    | ---              | ---                                                                                | 0.0018 | 1.51  | Normal up vs > 5 Years Off IS Tolerant   |
| 1566504_PM_at   | ---              | ---                                                                                | 0.0018 | -1.62 | Normal down vs > 5 Years Off IS Tolerant |
| 241962_PM_at    | ---              | ---                                                                                | 0.0018 | 1.39  | Normal up vs > 5 Years Off IS Tolerant   |
| 205639_PM_at    | AOAH             | acyloxyacyl hydrolase (neutrophil)                                                 | 0.0018 | -1.51 | Normal down vs > 5 Years Off IS Tolerant |
| 202649_PM_x_at  | RPS19            | ribosomal protein S19                                                              | 0.0018 | 1.16  | Normal up vs > 5 Years Off IS Tolerant   |
| 1555252_PM_a_at | TRPM3            | transient receptor potential cation channel, subfamily M, member 3                 | 0.0018 | -1.24 | Normal down vs > 5 Years Off IS Tolerant |

|                      |              |                                                                  |        |       |                                          |
|----------------------|--------------|------------------------------------------------------------------|--------|-------|------------------------------------------|
| 208165_PM_s_at       | PRSS16       | protease, serine, 16 (thymus)                                    | 0.0018 | -1.28 | Normal down vs > 5 Years Off IS Tolerant |
| 201049_PM_s_at       | RPS18        | ribosomal protein S18                                            | 0.0018 | 1.17  | Normal up vs > 5 Years Off IS Tolerant   |
| 217922_PM_at         | MAN1A2       | mannosidase, alpha, class 1A, member 2                           | 0.0018 | 1.28  | Normal up vs > 5 Years Off IS Tolerant   |
| 217136_PM_at         | PPIAL4A      | peptidylprolyl isomerase A (cyclophilin A)-like 4A               | 0.0018 | -1.45 | Normal down vs > 5 Years Off IS Tolerant |
| 237344_PM_at         | ---          | ---                                                              | 0.0018 | -1.48 | Normal down vs > 5 Years Off IS Tolerant |
| 244412_PM_at         | ---          | ---                                                              | 0.0018 | -1.41 | Normal down vs > 5 Years Off IS Tolerant |
| 1559342_PM_a_at      | SNRPN        | small nuclear ribonucleoprotein polypeptide N                    | 0.0018 | -1.26 | Normal down vs > 5 Years Off IS Tolerant |
| 242738_PM_s_at       | ZFH3         | zinc finger homeobox 3                                           | 0.0018 | -1.79 | Normal down vs > 5 Years Off IS Tolerant |
| 243294_PM_at         | ZNF780B      | zinc finger protein 780B                                         | 0.0018 | -1.36 | Normal down vs > 5 Years Off IS Tolerant |
| 1553354_PM_a_at      | FLJ31958     | hypothetical LOC143153                                           | 0.0018 | -2.52 | Normal down vs > 5 Years Off IS Tolerant |
| 36711_PM_at          | MAFF         | v-maf musculoaponeurotic fibrosarcoma oncogene homolog F (avian) | 0.0018 | 7.17  | Normal up vs > 5 Years Off IS Tolerant   |
| 232880_PM_at         | LOC100288224 | Hypothetical protein LOC100288224                                | 0.0018 | -1.50 | Normal down vs > 5 Years Off IS Tolerant |
| 207926_PM_at         | GP5          | glycoprotein V (platelet)                                        | 0.0018 | 1.58  | Normal up vs > 5 Years Off IS Tolerant   |
| 227304_PM_at         | SMCR8        | Smith-Magenis syndrome chromosome region, candidate 8            | 0.0018 | 1.63  | Normal up vs > 5 Years Off IS Tolerant   |
| 217003_PM_s_at       | ADAM5P       | ADAM metallopeptidase domain 5, pseudogene                       | 0.0018 | -1.50 | Normal down vs > 5 Years Off IS Tolerant |
| 41856_PM_at          | UNC5B        | unc-5 homolog B (C. elegans)                                     | 0.0018 | -1.45 | Normal down vs > 5 Years Off IS Tolerant |
| 220789_PM_s_at       | TBRG4        | transforming growth factor beta regulator 4                      | 0.0018 | 1.50  | Normal up vs > 5 Years Off IS Tolerant   |
| 237525_PM_at         | ---          | ---                                                              | 0.0018 | -1.35 | Normal down vs > 5 Years Off IS Tolerant |
| 1554777_PM_at        | ZFP42        | zinc finger protein 42 homolog (mouse)                           | 0.0018 | -1.30 | Normal down vs > 5 Years Off IS Tolerant |
| 204773_PM_at         | IL11RA       | interleukin 11 receptor, alpha                                   | 0.0018 | 1.69  | Normal up vs > 5 Years Off IS Tolerant   |
| AFFX-r2-Ec-bioB-5_at | ---          | ---                                                              | 0.0018 | -2.38 | Normal down vs > 5 Years Off IS Tolerant |
| 219976_PM_at         | HOOK1        | hook homolog 1 (Drosophila)                                      | 0.0018 | 1.58  | Normal up vs > 5 Years Off IS Tolerant   |

|                 |                           |                                                                     |        |       |                                          |
|-----------------|---------------------------|---------------------------------------------------------------------|--------|-------|------------------------------------------|
| 1552269_PM_at   | SPATA17                   | spermatogenesis associated 17                                       | 0.0018 | -1.55 | Normal down vs > 5 Years Off IS Tolerant |
| 202789_PM_at    | PLCG1                     | phospholipase C, gamma 1                                            | 0.0018 | 2.12  | Normal up vs > 5 Years Off IS Tolerant   |
| 220962_PM_s_at  | PADI1                     | peptidyl arginine deiminase, type I                                 | 0.0018 | -1.35 | Normal down vs > 5 Years Off IS Tolerant |
| 1563069_PM_at   | ---                       | ---                                                                 | 0.0018 | -1.43 | Normal down vs > 5 Years Off IS Tolerant |
| 215772_PM_x_at  | SUCLG2                    | succinate-CoA ligase, GDP-forming, beta subunit                     | 0.0018 | 1.56  | Normal up vs > 5 Years Off IS Tolerant   |
| 211487_PM_x_at  | LOC100505503 ///<br>RPS17 | 40S ribosomal protein S17-like /// ribosomal protein S17            | 0.0018 | 1.21  | Normal up vs > 5 Years Off IS Tolerant   |
| 1568936_PM_a_at | ---                       | ---                                                                 | 0.0018 | -1.27 | Normal down vs > 5 Years Off IS Tolerant |
| 1561940_PM_at   | LOC100128843              | hypothetical LOC100128843                                           | 0.0018 | -1.28 | Normal down vs > 5 Years Off IS Tolerant |
| 1564784_PM_at   | ---                       | ---                                                                 | 0.0018 | -1.40 | Normal down vs > 5 Years Off IS Tolerant |
| 204573_PM_at    | CROT                      | carnitine O-octanoyltransferase                                     | 0.0018 | 1.33  | Normal up vs > 5 Years Off IS Tolerant   |
| 228544_PM_s_at  | CSRP2BP ///<br>PET117     | CSRP2 binding protein /// cytochrome c oxidase assembly factor-like | 0.0018 | 1.67  | Normal up vs > 5 Years Off IS Tolerant   |
| 238658_PM_at    | ---                       | ---                                                                 | 0.0018 | -1.59 | Normal down vs > 5 Years Off IS Tolerant |
| 203299_PM_s_at  | AP1S2                     | adaptor-related protein complex 1, sigma 2 subunit                  | 0.0018 | -1.51 | Normal down vs > 5 Years Off IS Tolerant |
| 225277_PM_at    | SLC39A13                  | solute carrier family 39 (zinc transporter), member 13              | 0.0018 | 1.38  | Normal up vs > 5 Years Off IS Tolerant   |
| 1562689_PM_at   | LOC151484                 | hypothetical protein LOC151484                                      | 0.0018 | -1.30 | Normal down vs > 5 Years Off IS Tolerant |
| 1566980_PM_at   | ---                       | ---                                                                 | 0.0018 | 1.88  | Normal up vs > 5 Years Off IS Tolerant   |
| 235900_PM_at    | SPNS3                     | spinster homolog 3 (Drosophila)                                     | 0.0018 | 1.44  | Normal up vs > 5 Years Off IS Tolerant   |
| 200014_PM_s_at  | HNRNPC                    | heterogeneous nuclear ribonucleoprotein C (C1/C2)                   | 0.0018 | 1.28  | Normal up vs > 5 Years Off IS Tolerant   |
| 214368_PM_at    | RASGRP2                   | RAS guanyl releasing protein 2 (calcium and DAG-regulated)          | 0.0018 | 1.24  | Normal up vs > 5 Years Off IS Tolerant   |
| 1564876_PM_s_at | FOXP2                     | forkhead box P2                                                     | 0.0018 | -1.26 | Normal down vs > 5 Years Off IS Tolerant |
| 1566558_PM_x_at | FLJ90757                  | hypothetical LOC440465                                              | 0.0018 | -1.92 | Normal down vs > 5 Years Off IS Tolerant |
| 203966_PM_s_at  | PPM1A                     | protein phosphatase, Mg2+/Mn2+ dependent, 1A                        | 0.0018 | 1.60  | Normal up vs > 5 Years Off IS Tolerant   |
| 224591_PM_at    | HP1BP3                    | heterochromatin protein 1, binding protein 3                        | 0.0018 | 1.38  | Normal up vs > 5 Years Off IS Tolerant   |
| 225719_PM_s_at  | MRPL55                    | mitochondrial ribosomal protein L55                                 | 0.0018 | 1.64  | Normal up vs > 5 Years Off IS Tolerant   |

|                |        |                                                                                         |        |       |                                          |
|----------------|--------|-----------------------------------------------------------------------------------------|--------|-------|------------------------------------------|
| 1556471_PM_at  | SCML4  | sex comb on midleg-like 4 (Drosophila)                                                  | 0.0018 | 1.91  | Normal up vs > 5 Years Off IS Tolerant   |
| 212745_PM_s_at | BBS4   | Bardet-Biedl syndrome 4                                                                 | 0.0018 | 1.61  | Normal up vs > 5 Years Off IS Tolerant   |
| 210538_PM_s_at | BIRC3  | baculoviral IAP repeat-containing 3                                                     | 0.0018 | 1.85  | Normal up vs > 5 Years Off IS Tolerant   |
| 229278_PM_at   | USP51  | ubiquitin specific peptidase 51                                                         | 0.0019 | 1.25  | Normal up vs > 5 Years Off IS Tolerant   |
| 237448_PM_at   | ---    | ---                                                                                     | 0.0019 | -1.32 | Normal down vs > 5 Years Off IS Tolerant |
| 221013_PM_s_at | APOL2  | apolipoprotein L, 2                                                                     | 0.0019 | -1.68 | Normal down vs > 5 Years Off IS Tolerant |
| 223038_PM_s_at | FAM60A | family with sequence similarity 60, member A                                            | 0.0019 | 1.55  | Normal up vs > 5 Years Off IS Tolerant   |
| 214987_PM_at   | GAB1   | GRB2-associated binding protein 1                                                       | 0.0019 | -1.50 | Normal down vs > 5 Years Off IS Tolerant |
| 244117_PM_at   | ---    | ---                                                                                     | 0.0019 | -1.43 | Normal down vs > 5 Years Off IS Tolerant |
| 204426_PM_at   | TMED2  | transmembrane emp24 domain trafficking protein 2                                        | 0.0019 | 2.42  | Normal up vs > 5 Years Off IS Tolerant   |
| 204903_PM_x_at | ATG4B  | ATG4 autophagy related 4 homolog B (S. cerevisiae)                                      | 0.0019 | 1.45  | Normal up vs > 5 Years Off IS Tolerant   |
| 222810_PM_s_at | RASAL2 | RAS protein activator like 2                                                            | 0.0019 | -1.64 | Normal down vs > 5 Years Off IS Tolerant |
| 203492_PM_x_at | CEP57  | centrosomal protein 57kDa                                                               | 0.0019 | 1.41  | Normal up vs > 5 Years Off IS Tolerant   |
| 213215_PM_at   | AP3S2  | adaptor-related protein complex 3, sigma 2 subunit                                      | 0.0019 | -1.58 | Normal down vs > 5 Years Off IS Tolerant |
| 242549_PM_at   | PRKD3  | protein kinase D3                                                                       | 0.0019 | 2.60  | Normal up vs > 5 Years Off IS Tolerant   |
| 236309_PM_x_at | ZMIZ2  | zinc finger, MIZ-type containing 2                                                      | 0.0019 | 1.29  | Normal up vs > 5 Years Off IS Tolerant   |
| 205199_PM_at   | CA9    | carbonic anhydrase IX                                                                   | 0.0019 | -1.32 | Normal down vs > 5 Years Off IS Tolerant |
| 210616_PM_s_at | SEC31A | SEC31 homolog A (S. cerevisiae)                                                         | 0.0019 | 1.18  | Normal up vs > 5 Years Off IS Tolerant   |
| 222141_PM_at   | KLHL22 | kelch-like 22 (Drosophila)                                                              | 0.0019 | 1.51  | Normal up vs > 5 Years Off IS Tolerant   |
| 209323_PM_at   | PRKRIR | protein-kinase, interferon-inducible double stranded RNA dependent inhibitor, repressor | 0.0019 | 1.38  | Normal up vs > 5 Years Off IS Tolerant   |
| 201385_PM_at   | DHX15  | DEAH (Asp-Glu-Ala-His) box polypeptide 15                                               | 0.0019 | 1.19  | Normal up vs > 5 Years Off IS Tolerant   |
| 239346_PM_at   | ---    | ---                                                                                     | 0.0019 | 1.98  | Normal up vs > 5 Years Off IS Tolerant   |
| 234556_PM_at   | ---    | ---                                                                                     | 0.0019 | -1.28 | Normal down vs > 5 Years Off IS Tolerant |
| 213062_PM_at   | NTAN1  | N-terminal asparagine amidase                                                           | 0.0019 | 1.48  | Normal up vs > 5 Years Off IS Tolerant   |
| 217464_PM_at   | ---    | ---                                                                                     | 0.0019 | -1.24 | Normal down vs > 5 Years Off IS Tolerant |
| 203006_PM_at   | INPP5A | inositol polyphosphate-5-phosphatase, 40kDa                                             | 0.0019 | 1.56  | Normal up vs > 5 Years Off IS Tolerant   |
| 233767_PM_at   | HHLA1  | HERV-H LTR-associating 1                                                                | 0.0019 | -1.40 | Normal down vs > 5 Years Off IS Tolerant |
| 1558739_PM_at  | ---    | ---                                                                                     | 0.0019 | 2.30  | Normal up vs > 5 Years Off IS Tolerant   |



|                 |                 |                                                                                    |        |       |                                          |
|-----------------|-----------------|------------------------------------------------------------------------------------|--------|-------|------------------------------------------|
| 223072_PM_s_at  | INO80B /// WBP1 | INO80 complex subunit B /// WW domain binding protein 1                            | 0.0019 | 1.52  | Normal up vs > 5 Years Off IS Tolerant   |
| 230637_PM_at    | SFXN4           | sideroflexin 4                                                                     | 0.0019 | 1.40  | Normal up vs > 5 Years Off IS Tolerant   |
| 202859_PM_x_at  | IL8             | interleukin 8                                                                      | 0.0019 | 3.40  | Normal up vs > 5 Years Off IS Tolerant   |
| 202716_PM_at    | PTPN1           | protein tyrosine phosphatase, non-receptor type 1                                  | 0.0019 | 1.38  | Normal up vs > 5 Years Off IS Tolerant   |
| 244293_PM_at    | UQCRB           | ubiquinol-cytochrome c reductase binding protein                                   | 0.0019 | 1.60  | Normal up vs > 5 Years Off IS Tolerant   |
| 1564414_PM_a_at | PNLDC1          | poly(A)-specific ribonuclease (PARN)-like domain containing 1                      | 0.0019 | -1.25 | Normal down vs > 5 Years Off IS Tolerant |
| 228788_PM_at    | YPEL1           | yippee-like 1 (Drosophila)                                                         | 0.0019 | 1.96  | Normal up vs > 5 Years Off IS Tolerant   |
| 241132_PM_at    | ---             | ---                                                                                | 0.0019 | -1.35 | Normal down vs > 5 Years Off IS Tolerant |
| 1566633_PM_at   | ---             | ---                                                                                | 0.0019 | -1.54 | Normal down vs > 5 Years Off IS Tolerant |
| 1570136_PM_at   | ---             | ---                                                                                | 0.0019 | -1.60 | Normal down vs > 5 Years Off IS Tolerant |
| 233883_PM_at    | ---             | ---                                                                                | 0.0019 | -1.39 | Normal down vs > 5 Years Off IS Tolerant |
| 232512_PM_at    | ---             | ---                                                                                | 0.0019 | -1.48 | Normal down vs > 5 Years Off IS Tolerant |
| 208302_PM_at    | HMHB1           | histocompatibility (minor) HB-1                                                    | 0.0019 | -1.38 | Normal down vs > 5 Years Off IS Tolerant |
| 204440_PM_at    | CD83            | CD83 molecule                                                                      | 0.0019 | 3.56  | Normal up vs > 5 Years Off IS Tolerant   |
| 243423_PM_at    | ---             | ---                                                                                | 0.0019 | 2.00  | Normal up vs > 5 Years Off IS Tolerant   |
| 216380_PM_x_at  | ---             | ---                                                                                | 0.0019 | 1.45  | Normal up vs > 5 Years Off IS Tolerant   |
| 1559585_PM_at   | DDX60L          | DEAD (Asp-Glu-Ala-Asp) box polypeptide 60-like                                     | 0.0019 | -2.77 | Normal down vs > 5 Years Off IS Tolerant |
| 207699_PM_at    | ZFHX2           | zinc finger homeobox 2                                                             | 0.0019 | -1.35 | Normal down vs > 5 Years Off IS Tolerant |
| 1561557_PM_at   | LIPA            | Lipase A, lysosomal acid, cholesterol esterase                                     | 0.0019 | -1.67 | Normal down vs > 5 Years Off IS Tolerant |
| 208067_PM_x_at  | UTY             | ubiquitously transcribed tetratricopeptide repeat gene, Y-linked                   | 0.0019 | -4.88 | Normal down vs > 5 Years Off IS Tolerant |
| 225632_PM_s_at  | ISY1 /// RAB43  | ISY1 splicing factor homolog (S. cerevisiae) /// RAB43, member RAS oncogene family | 0.0019 | 1.56  | Normal up vs > 5 Years Off IS Tolerant   |
| 237695_PM_at    | ---             | ---                                                                                | 0.0019 | -1.59 | Normal down vs > 5 Years Off IS Tolerant |
| 240001_PM_at    | ---             | ---                                                                                | 0.0019 | -1.60 | Normal down vs > 5 Years Off IS Tolerant |
| 1552542_PM_s_at | TAGAP           | T-cell activation RhoGTPase activating protein                                     | 0.0019 | 2.23  | Normal up vs > 5 Years Off IS Tolerant   |

|                |          |                                                                                         |        |       |                                          |
|----------------|----------|-----------------------------------------------------------------------------------------|--------|-------|------------------------------------------|
| 213227_PM_at   | PGRMC2   | progesterone receptor membrane component 2                                              | 0.0019 | 2.13  | Normal up vs > 5 Years Off IS Tolerant   |
| 234303_PM_s_at | GPR85    | G protein-coupled receptor 85                                                           | 0.0019 | -1.68 | Normal down vs > 5 Years Off IS Tolerant |
| 216721_PM_at   | SLC25A30 | Solute carrier family 25, member 30                                                     | 0.0019 | -1.51 | Normal down vs > 5 Years Off IS Tolerant |
| 203569_PM_s_at | OFD1     | oral-facial-digital syndrome 1                                                          | 0.0019 | 1.55  | Normal up vs > 5 Years Off IS Tolerant   |
| 212219_PM_at   | PSME4    | proteasome (prosome, macropain) activator subunit 4                                     | 0.0019 | 1.52  | Normal up vs > 5 Years Off IS Tolerant   |
| 238778_PM_at   | MPP7     | membrane protein, palmitoylated 7 (MAGUK p55 subfamily member 7)                        | 0.0019 | 1.86  | Normal up vs > 5 Years Off IS Tolerant   |
| 202916_PM_s_at | FAM20B   | family with sequence similarity 20, member B                                            | 0.0019 | 1.51  | Normal up vs > 5 Years Off IS Tolerant   |
| 208489_PM_at   | GJA8     | gap junction protein, alpha 8, 50kDa                                                    | 0.0019 | -1.31 | Normal down vs > 5 Years Off IS Tolerant |
| 202466_PM_at   | PAPD7    | PAP associated domain containing 7                                                      | 0.0019 | 1.46  | Normal up vs > 5 Years Off IS Tolerant   |
| 223808_PM_s_at | PTPMT1   | protein tyrosine phosphatase, mitochondrial 1                                           | 0.0019 | 1.76  | Normal up vs > 5 Years Off IS Tolerant   |
| 244857_PM_at   | HBEGF    | heparin-binding EGF-like growth factor                                                  | 0.0019 | -1.29 | Normal down vs > 5 Years Off IS Tolerant |
| 217940_PM_s_at | CARKD    | carbohydrate kinase domain containing                                                   | 0.0019 | 1.52  | Normal up vs > 5 Years Off IS Tolerant   |
| 219093_PM_at   | PID1     | phosphotyrosine interaction domain containing 1                                         | 0.0019 | -2.55 | Normal down vs > 5 Years Off IS Tolerant |
| 226665_PM_at   | AHSA2    | AHA1, activator of heat shock 90kDa protein ATPase homolog 2 (yeast)                    | 0.0019 | 2.57  | Normal up vs > 5 Years Off IS Tolerant   |
| 244726_PM_at   | ---      | ---                                                                                     | 0.0019 | -1.97 | Normal down vs > 5 Years Off IS Tolerant |
| 238902_PM_at   | ---      | ---                                                                                     | 0.0019 | -1.66 | Normal down vs > 5 Years Off IS Tolerant |
| 207497_PM_s_at | MS4A2    | membrane-spanning 4-domains, subfamily A, member 2 (Fc fragment of IgE, high affinity I | 0.0019 | -1.34 | Normal down vs > 5 Years Off IS Tolerant |
| 215212_PM_at   | ---      | ---                                                                                     | 0.0019 | 2.07  | Normal up vs > 5 Years Off IS Tolerant   |
| 225190_PM_x_at | RPL35A   | ribosomal protein L35a                                                                  | 0.0020 | 1.16  | Normal up vs > 5 Years Off IS Tolerant   |
| 1557829_PM_at  | ---      | ---                                                                                     | 0.0020 | -1.32 | Normal down vs > 5 Years Off IS Tolerant |
| 203697_PM_at   | FRZB     | frizzled-related protein                                                                | 0.0020 | -1.44 | Normal down vs > 5 Years Off IS Tolerant |
| 204019_PM_s_at | SH3YL1   | SH3 domain containing, Ysc84-like 1 (S. cerevisiae)                                     | 0.0020 | 1.94  | Normal up vs > 5 Years Off IS Tolerant   |
| 220436_PM_at   | CNTNAP3B | similar to cell recognition molecule CASPR3                                             | 0.0020 | -1.67 | Normal down vs > 5 Years Off IS Tolerant |
| 227534_PM_at   | C9orf21  | chromosome 9 open reading frame 21                                                      | 0.0020 | 2.04  | Normal up vs > 5 Years Off IS Tolerant   |
| 209545_PM_s_at | RIPK2    | receptor-interacting serine-threonine kinase 2                                          | 0.0020 | 2.41  | Normal up vs > 5 Years Off IS Tolerant   |

|                 |          |                                                                                        |        |       |                                          |
|-----------------|----------|----------------------------------------------------------------------------------------|--------|-------|------------------------------------------|
| 219396_PM_s_at  | NEIL1    | nei endonuclease VIII-like 1 (E. coli)                                                 | 0.0020 | 1.99  | Normal up vs > 5 Years Off IS Tolerant   |
| 228333_PM_at    | ZEB2     | zinc finger E-box binding homeobox 2                                                   | 0.0020 | -1.79 | Normal down vs > 5 Years Off IS Tolerant |
| 221704_PM_s_at  | VPS37B   | vacuolar protein sorting 37 homolog B (S. cerevisiae)                                  | 0.0020 | 1.89  | Normal up vs > 5 Years Off IS Tolerant   |
| 1566678_PM_at   | MMP2     | Matrix metalloproteinase 2 (gelatinase A, 72kDa gelatinase, 72kDa type IV collagenase) | 0.0020 | -1.33 | Normal down vs > 5 Years Off IS Tolerant |
| 232891_PM_at    | SIRPD    | signal-regulatory protein delta                                                        | 0.0020 | -1.60 | Normal down vs > 5 Years Off IS Tolerant |
| 235769_PM_at    | ZNF497   | Zinc finger protein 497                                                                | 0.0020 | -1.31 | Normal down vs > 5 Years Off IS Tolerant |
| 224967_PM_at    | UGCG     | UDP-glucose ceramide glucosyltransferase                                               | 0.0020 | 1.62  | Normal up vs > 5 Years Off IS Tolerant   |
| 1560877_PM_a_at | ---      | ---                                                                                    | 0.0020 | -1.50 | Normal down vs > 5 Years Off IS Tolerant |
| 1570225_PM_at   | TMEM150B | transmembrane protein 150B                                                             | 0.0020 | -1.37 | Normal down vs > 5 Years Off IS Tolerant |
| 209336_PM_at    | PWP2     | PWP2 periodic tryptophan protein homolog (yeast)                                       | 0.0020 | 1.52  | Normal up vs > 5 Years Off IS Tolerant   |
| 205893_PM_at    | NLGN1    | neuroligin 1                                                                           | 0.0020 | -1.58 | Normal down vs > 5 Years Off IS Tolerant |
| 239808_PM_at    | ---      | ---                                                                                    | 0.0020 | 2.40  | Normal up vs > 5 Years Off IS Tolerant   |
| 204259_PM_at    | MMP7     | matrix metalloproteinase 7 (matrilysin, uterine)                                       | 0.0020 | -1.28 | Normal down vs > 5 Years Off IS Tolerant |
| 1570284_PM_x_at | ---      | ---                                                                                    | 0.0020 | -1.34 | Normal down vs > 5 Years Off IS Tolerant |
| 219388_PM_at    | GRHL2    | grainyhead-like 2 (Drosophila)                                                         | 0.0020 | -1.26 | Normal down vs > 5 Years Off IS Tolerant |
| 215094_PM_at    | SPICE1   | spindle and centriole associated protein 1                                             | 0.0020 | -1.28 | Normal down vs > 5 Years Off IS Tolerant |
| 223728_PM_at    | CENPBD1  | CENPB DNA-binding domains containing 1                                                 | 0.0020 | -1.59 | Normal down vs > 5 Years Off IS Tolerant |
| 217056_PM_at    | TRD@     | T cell receptor delta locus                                                            | 0.0020 | 1.31  | Normal up vs > 5 Years Off IS Tolerant   |
| 231847_PM_at    | ANKRD54  | ankyrin repeat domain 54                                                               | 0.0020 | 1.58  | Normal up vs > 5 Years Off IS Tolerant   |
| 202264_PM_s_at  | TOMM40   | translocase of outer mitochondrial membrane 40 homolog (yeast)                         | 0.0020 | -1.43 | Normal down vs > 5 Years Off IS Tolerant |
| 210112_PM_at    | HPS1     | Hermansky-Pudlak syndrome 1                                                            | 0.0020 | 1.84  | Normal up vs > 5 Years Off IS Tolerant   |
| 205453_PM_at    | HOXB2    | homeobox B2                                                                            | 0.0020 | 2.35  | Normal up vs > 5 Years Off IS Tolerant   |
| 222865_PM_x_at  | TMEM204  | transmembrane protein 204                                                              | 0.0020 | -1.36 | Normal down vs > 5 Years Off IS Tolerant |
| 212324_PM_s_at  | VPS13D   | vacuolar protein sorting 13 homolog D (S. cerevisiae)                                  | 0.0020 | 1.68  | Normal up vs > 5 Years Off IS Tolerant   |
| 201937_PM_s_at  | DNPEP    | aspartyl aminopeptidase                                                                | 0.0020 | 1.57  | Normal up vs > 5 Years Off IS Tolerant   |

|                |           |                                                            |        |       |                                          |
|----------------|-----------|------------------------------------------------------------|--------|-------|------------------------------------------|
| 227203_PM_at   | FBXL17    | F-box and leucine-rich repeat protein 17                   | 0.0020 | 1.50  | Normal up vs > 5 Years Off IS Tolerant   |
| 234201_PM_x_at | ---       | ---                                                        | 0.0020 | -1.52 | Normal down vs > 5 Years Off IS Tolerant |
| 209235_PM_at   | CLCN7     | chloride channel 7                                         | 0.0020 | -1.43 | Normal down vs > 5 Years Off IS Tolerant |
| 218395_PM_at   | ACTR6     | ARP6 actin-related protein 6 homolog (yeast)               | 0.0020 | 1.71  | Normal up vs > 5 Years Off IS Tolerant   |
| 40489_PM_at    | ATN1      | atrophin 1                                                 | 0.0020 | -1.23 | Normal down vs > 5 Years Off IS Tolerant |
| 223165_PM_s_at | IP6K2     | inositol hexakisphosphate kinase 2                         | 0.0020 | 1.96  | Normal up vs > 5 Years Off IS Tolerant   |
| 204567_PM_s_at | ABCG1     | ATP-binding cassette, sub-family G (WHITE), member 1       | 0.0020 | 2.52  | Normal up vs > 5 Years Off IS Tolerant   |
| 213585_PM_s_at | PDCD2     | Programmed cell death 2                                    | 0.0020 | -1.42 | Normal down vs > 5 Years Off IS Tolerant |
| 209679_PM_s_at | SMAGP     | small cell adhesion glycoprotein                           | 0.0020 | 1.68  | Normal up vs > 5 Years Off IS Tolerant   |
| 225287_PM_s_at | TMEM55B   | transmembrane protein 55B                                  | 0.0020 | 1.41  | Normal up vs > 5 Years Off IS Tolerant   |
| 1558181_PM_at  | ---       | ---                                                        | 0.0020 | -1.39 | Normal down vs > 5 Years Off IS Tolerant |
| 1562314_PM_at  | ---       | ---                                                        | 0.0020 | -1.56 | Normal down vs > 5 Years Off IS Tolerant |
| 225901_PM_at   | PTPMT1    | protein tyrosine phosphatase, mitochondrial 1              | 0.0020 | 1.47  | Normal up vs > 5 Years Off IS Tolerant   |
| 231329_PM_at   | ---       | ---                                                        | 0.0020 | 1.98  | Normal up vs > 5 Years Off IS Tolerant   |
| 205992_PM_s_at | IL15      | interleukin 15                                             | 0.0020 | -1.54 | Normal down vs > 5 Years Off IS Tolerant |
| 217853_PM_at   | TNS3      | tensin 3                                                   | 0.0020 | -1.50 | Normal down vs > 5 Years Off IS Tolerant |
| 200669_PM_s_at | UBE2D3    | ubiquitin-conjugating enzyme E2D 3 (UBC4/5 homolog, yeast) | 0.0020 | 1.33  | Normal up vs > 5 Years Off IS Tolerant   |
| 201473_PM_at   | JUNB      | jun B proto-oncogene                                       | 0.0020 | 1.51  | Normal up vs > 5 Years Off IS Tolerant   |
| 237786_PM_at   | ---       | ---                                                        | 0.0020 | -1.56 | Normal down vs > 5 Years Off IS Tolerant |
| 1561096_PM_at  | LOC285419 | hypothetical LOC285419                                     | 0.0020 | -1.62 | Normal down vs > 5 Years Off IS Tolerant |
| 205486_PM_at   | TESK2     | testis-specific kinase 2                                   | 0.0020 | 1.51  | Normal up vs > 5 Years Off IS Tolerant   |
| 234599_PM_at   | ---       | ---                                                        | 0.0020 | 3.06  | Normal up vs > 5 Years Off IS Tolerant   |
| 238402_PM_s_at | FLJ35220  | hypothetical protein FLJ35220                              | 0.0020 | -1.70 | Normal down vs > 5 Years Off IS Tolerant |
| 1566425_PM_at  | ---       | ---                                                        | 0.0020 | -1.46 | Normal down vs > 5 Years Off IS Tolerant |
| 201109_PM_s_at | THBS1     | thrombospondin 1                                           | 0.0020 | 8.63  | Normal up vs > 5 Years Off IS Tolerant   |

|                 |                            |                                                                                  |        |       |                                          |
|-----------------|----------------------------|----------------------------------------------------------------------------------|--------|-------|------------------------------------------|
| 225325_PM_at    | MFSD6                      | major facilitator superfamily domain containing 6                                | 0.0020 | 1.80  | Normal up vs > 5 Years Off IS Tolerant   |
| 218312_PM_s_at  | ZSCAN18                    | zinc finger and SCAN domain containing 18                                        | 0.0020 | 2.10  | Normal up vs > 5 Years Off IS Tolerant   |
| 223074_PM_s_at  | AIF1L                      | allograft inflammatory factor 1-like                                             | 0.0020 | -1.34 | Normal down vs > 5 Years Off IS Tolerant |
| 221656_PM_s_at  | ARHGEF10L                  | Rho guanine nucleotide exchange factor (GEF) 10-like                             | 0.0020 | -1.89 | Normal down vs > 5 Years Off IS Tolerant |
| 1552401_PM_a_at | NCRNA00258                 | non-protein coding RNA 258                                                       | 0.0020 | -1.43 | Normal down vs > 5 Years Off IS Tolerant |
| 1554019_PM_s_at | CEP57L1                    | centrosomal protein 57kDa-like 1                                                 | 0.0020 | -1.63 | Normal down vs > 5 Years Off IS Tolerant |
| 1569849_PM_at   | ---                        | ---                                                                              | 0.0020 | -1.33 | Normal down vs > 5 Years Off IS Tolerant |
| 212136_PM_at    | ATP2B4                     | ATPase, Ca <sup>++</sup> transporting, plasma membrane 4                         | 0.0020 | 1.72  | Normal up vs > 5 Years Off IS Tolerant   |
| 219633_PM_at    | TTPAL                      | tocopherol (alpha) transfer protein-like                                         | 0.0020 | 1.67  | Normal up vs > 5 Years Off IS Tolerant   |
| 211967_PM_at    | TMEM123                    | transmembrane protein 123                                                        | 0.0020 | 1.42  | Normal up vs > 5 Years Off IS Tolerant   |
| 231373_PM_at    | RNF133                     | ring finger protein 133                                                          | 0.0020 | -1.68 | Normal down vs > 5 Years Off IS Tolerant |
| 235519_PM_at    | FOXK1                      | Forkhead box K1                                                                  | 0.0020 | -1.32 | Normal down vs > 5 Years Off IS Tolerant |
| 211774_PM_s_at  | MMACHC                     | methymlalonic aciduria (cobalamin deficiency) cblC type, with homocystinuria     | 0.0020 | -1.37 | Normal down vs > 5 Years Off IS Tolerant |
| 205688_PM_at    | TFAP4                      | transcription factor AP-4 (activating enhancer binding protein 4)                | 0.0020 | -1.33 | Normal down vs > 5 Years Off IS Tolerant |
| 1556029_PM_s_at | NMNAT2                     | nicotinamide nucleotide adenyltransferase 2                                      | 0.0020 | -1.33 | Normal down vs > 5 Years Off IS Tolerant |
| 233086_PM_at    | C20orf106 ///<br>C20orf107 | chromosome 20 open reading frame 106 ///<br>chromosome 20 open reading frame 107 | 0.0020 | 1.83  | Normal up vs > 5 Years Off IS Tolerant   |
| 221791_PM_s_at  | CCDC72                     | coiled-coil domain containing 72                                                 | 0.0020 | 1.18  | Normal up vs > 5 Years Off IS Tolerant   |
| 219746_PM_at    | DPF3                       | D4, zinc and double PHD fingers, family 3                                        | 0.0020 | -1.38 | Normal down vs > 5 Years Off IS Tolerant |
| 1565887_PM_at   | TRPM7                      | Transient receptor potential cation channel, subfamily M, member 7               | 0.0020 | -1.48 | Normal down vs > 5 Years Off IS Tolerant |
| 1558987_PM_at   | ---                        | ---                                                                              | 0.0020 | 1.35  | Normal up vs > 5 Years Off IS Tolerant   |
| 242932_PM_at    | ---                        | ---                                                                              | 0.0020 | 1.70  | Normal up vs > 5 Years Off IS Tolerant   |
| 238633_PM_at    | ---                        | ---                                                                              | 0.0020 | 1.95  | Normal up vs > 5 Years Off IS Tolerant   |
| 203356_PM_at    | CAPN7                      | calpain 7                                                                        | 0.0020 | 1.72  | Normal up vs > 5 Years Off IS Tolerant   |
| 218219_PM_s_at  | LANCL2                     | LanC lantibiotic synthetase component C-like 2 (bacterial)                       | 0.0020 | 2.13  | Normal up vs > 5 Years Off IS Tolerant   |
| 212744_PM_at    | BBS4                       | Bardet-Biedl syndrome 4                                                          | 0.0020 | 1.51  | Normal up vs > 5 Years Off IS Tolerant   |

|                |           |                                                             |        |       |                                          |
|----------------|-----------|-------------------------------------------------------------|--------|-------|------------------------------------------|
| 205710_PM_at   | LRP2      | low density lipoprotein receptor-related protein 2          | 0.0020 | -1.31 | Normal down vs > 5 Years Off IS Tolerant |
| 225006_PM_x_at | TH1L      | TH1-like (Drosophila)                                       | 0.0020 | 1.36  | Normal up vs > 5 Years Off IS Tolerant   |
| 211450_PM_s_at | MSH6      | mutS homolog 6 (E. coli)                                    | 0.0021 | 2.12  | Normal up vs > 5 Years Off IS Tolerant   |
| 214065_PM_s_at | CIB2      | calcium and integrin binding family member 2                | 0.0021 | -1.40 | Normal down vs > 5 Years Off IS Tolerant |
| 240431_PM_at   | ---       | ---                                                         | 0.0021 | -1.60 | Normal down vs > 5 Years Off IS Tolerant |
| 201975_PM_at   | CLIP1     | CAP-GLY domain containing linker protein 1                  | 0.0021 | 1.60  | Normal up vs > 5 Years Off IS Tolerant   |
| 235415_PM_at   | RPRD2     | regulation of nuclear pre-mRNA domain containing 2          | 0.0021 | 1.44  | Normal up vs > 5 Years Off IS Tolerant   |
| 233959_PM_at   | LOC221442 | adenylate cyclase 10 pseudogene                             | 0.0021 | 1.48  | Normal up vs > 5 Years Off IS Tolerant   |
| 215849_PM_x_at | TTC18     | tetratricopeptide repeat domain 18                          | 0.0021 | -1.81 | Normal down vs > 5 Years Off IS Tolerant |
| 234053_PM_at   | ---       | ---                                                         | 0.0021 | -1.38 | Normal down vs > 5 Years Off IS Tolerant |
| 202635_PM_s_at | POLR2K    | polymerase (RNA) II (DNA directed) polypeptide K, 7.0kDa    | 0.0021 | 1.77  | Normal up vs > 5 Years Off IS Tolerant   |
| 219475_PM_at   | OSGIN1    | oxidative stress induced growth inhibitor 1                 | 0.0021 | -1.55 | Normal down vs > 5 Years Off IS Tolerant |
| 221890_PM_at   | ZNF335    | zinc finger protein 335                                     | 0.0021 | 1.52  | Normal up vs > 5 Years Off IS Tolerant   |
| 206636_PM_at   | RASA2     | RAS p21 protein activator 2                                 | 0.0021 | 2.09  | Normal up vs > 5 Years Off IS Tolerant   |
| 205582_PM_s_at | GGT5      | gamma-glutamyltransferase 5                                 | 0.0021 | -1.31 | Normal down vs > 5 Years Off IS Tolerant |
| 210926_PM_at   | POTEKP    | POTE ankyrin domain family, member K, pseudogene            | 0.0021 | -1.34 | Normal down vs > 5 Years Off IS Tolerant |
| 214060_PM_at   | SSBP1     | single-stranded DNA binding protein 1                       | 0.0021 | 1.98  | Normal up vs > 5 Years Off IS Tolerant   |
| 225121_PM_at   | TBC1D23   | TBC1 domain family, member 23                               | 0.0021 | 1.63  | Normal up vs > 5 Years Off IS Tolerant   |
| 200610_PM_s_at | NCL       | nucleolin                                                   | 0.0021 | 1.26  | Normal up vs > 5 Years Off IS Tolerant   |
| 225738_PM_at   | RAPGEF1   | Rap guanine nucleotide exchange factor (GEF) 1              | 0.0021 | 1.74  | Normal up vs > 5 Years Off IS Tolerant   |
| 240095_PM_at   | ---       | ---                                                         | 0.0021 | -1.48 | Normal down vs > 5 Years Off IS Tolerant |
| 221547_PM_at   | PRPF18    | PRP18 pre-mRNA processing factor 18 homolog (S. cerevisiae) | 0.0021 | 1.64  | Normal up vs > 5 Years Off IS Tolerant   |
| 200915_PM_x_at | KTN1      | kinectin 1 (kinesin receptor)                               | 0.0021 | 1.23  | Normal up vs > 5 Years Off IS Tolerant   |
| 216945_PM_x_at | PASK      | PAS domain containing serine/threonine kinase               | 0.0021 | 2.61  | Normal up vs > 5 Years Off IS Tolerant   |
| 239753_PM_at   | ZNF252    | zinc finger protein 252                                     | 0.0021 | -1.45 | Normal down vs > 5 Years Off IS Tolerant |
| 1556891_PM_at  | SORCS1    | sortilin-related VPS10 domain containing receptor 1         | 0.0021 | -1.29 | Normal down vs > 5 Years Off IS Tolerant |

|                 |          |                                                                   |        |       |                                          |
|-----------------|----------|-------------------------------------------------------------------|--------|-------|------------------------------------------|
| 229631_PM_at    | DNHD1    | dynein heavy chain domain 1                                       | 0.0021 | 1.38  | Normal up vs > 5 Years Off IS Tolerant   |
| 235918_PM_x_at  | CEP97    | centrosomal protein 97kDa                                         | 0.0021 | 1.98  | Normal up vs > 5 Years Off IS Tolerant   |
| 244684_PM_at    | PGGT1B   | Protein geranylgeranyltransferase type I, beta subunit            | 0.0021 | -1.38 | Normal down vs > 5 Years Off IS Tolerant |
| 221432_PM_s_at  | SLC25A28 | solute carrier family 25, member 28                               | 0.0021 | 1.71  | Normal up vs > 5 Years Off IS Tolerant   |
| 1562327_PM_at   | ---      | ---                                                               | 0.0021 | -1.34 | Normal down vs > 5 Years Off IS Tolerant |
| 206395_PM_at    | DGKG     | diacylglycerol kinase, gamma 90kDa                                | 0.0021 | -1.31 | Normal down vs > 5 Years Off IS Tolerant |
| 219160_PM_s_at  | PAPOLG   | poly(A) polymerase gamma                                          | 0.0021 | -1.31 | Normal down vs > 5 Years Off IS Tolerant |
| 243177_PM_at    | ---      | ---                                                               | 0.0021 | -2.22 | Normal down vs > 5 Years Off IS Tolerant |
| 210625_PM_s_at  | AKAP1    | A kinase (PRKA) anchor protein 1                                  | 0.0021 | 1.76  | Normal up vs > 5 Years Off IS Tolerant   |
| 204819_PM_at    | FGD1     | FYVE, RhoGEF and PH domain containing 1                           | 0.0021 | -1.37 | Normal down vs > 5 Years Off IS Tolerant |
| 209646_PM_x_at  | ALDH1B1  | aldehyde dehydrogenase 1 family, member B1                        | 0.0021 | -1.78 | Normal down vs > 5 Years Off IS Tolerant |
| 226848_PM_at    | ---      | ---                                                               | 0.0021 | 1.79  | Normal up vs > 5 Years Off IS Tolerant   |
| 215858_PM_at    | ---      | ---                                                               | 0.0021 | -1.36 | Normal down vs > 5 Years Off IS Tolerant |
| 228426_PM_at    | CLEC2D   | C-type lectin domain family 2, member D                           | 0.0021 | 2.43  | Normal up vs > 5 Years Off IS Tolerant   |
| 210969_PM_at    | PKN2     | protein kinase N2                                                 | 0.0021 | -1.61 | Normal down vs > 5 Years Off IS Tolerant |
| 228436_PM_at    | KCNC4    | potassium voltage-gated channel, Shaw-related subfamily, member 4 | 0.0021 | -1.29 | Normal down vs > 5 Years Off IS Tolerant |
| 1563130_PM_a_at | ---      | ---                                                               | 0.0021 | 1.87  | Normal up vs > 5 Years Off IS Tolerant   |
| 1565717_PM_s_at | FUS      | fused in sarcoma                                                  | 0.0021 | 1.68  | Normal up vs > 5 Years Off IS Tolerant   |
| 218783_PM_at    | INTS7    | integrator complex subunit 7                                      | 0.0021 | -1.86 | Normal down vs > 5 Years Off IS Tolerant |
| 212665_PM_at    | TIPARP   | TCDD-inducible poly(ADP-ribose) polymerase                        | 0.0021 | 2.91  | Normal up vs > 5 Years Off IS Tolerant   |
| 208371_PM_s_at  | RING1    | ring finger protein 1                                             | 0.0021 | 1.28  | Normal up vs > 5 Years Off IS Tolerant   |
| 1294_PM_at      | UBA7     | ubiquitin-like modifier activating enzyme 7                       | 0.0021 | 1.36  | Normal up vs > 5 Years Off IS Tolerant   |
| 212375_PM_at    | EP400    | E1A binding protein p400                                          | 0.0021 | 1.54  | Normal up vs > 5 Years Off IS Tolerant   |
| 1559607_PM_s_at | GBP6     | guanylate binding protein family, member 6                        | 0.0021 | -1.43 | Normal down vs > 5 Years Off IS Tolerant |
| 204859_PM_s_at  | APAF1    | apoptotic peptidase activating factor 1                           | 0.0021 | -1.92 | Normal down vs > 5 Years Off IS Tolerant |
| 209923_PM_s_at  | BRAP     | BRCA1 associated protein                                          | 0.0021 | 1.36  | Normal up vs > 5 Years Off IS Tolerant   |

|                 |                  |                                                                                         |        |       |                                          |
|-----------------|------------------|-----------------------------------------------------------------------------------------|--------|-------|------------------------------------------|
| 225353_PM_s_at  | C1QC             | complement component 1, q subcomponent, C chain                                         | 0.0021 | -1.54 | Normal down vs > 5 Years Off IS Tolerant |
| 1555499_PM_a_at | IL28RA           | interleukin 28 receptor, alpha (interferon, lambda receptor)                            | 0.0021 | -1.33 | Normal down vs > 5 Years Off IS Tolerant |
| 46142_PM_at     | LMF1             | lipase maturation factor 1                                                              | 0.0021 | 1.62  | Normal up vs > 5 Years Off IS Tolerant   |
| 207311_PM_at    | DOC2B            | double C2-like domains, beta                                                            | 0.0021 | -1.32 | Normal down vs > 5 Years Off IS Tolerant |
| 241153_PM_at    | ---              | ---                                                                                     | 0.0021 | -1.36 | Normal down vs > 5 Years Off IS Tolerant |
| 210163_PM_at    | CXCL11           | chemokine (C-X-C motif) ligand 11                                                       | 0.0022 | -1.44 | Normal down vs > 5 Years Off IS Tolerant |
| 220357_PM_s_at  | SGK2             | serum/glucocorticoid regulated kinase 2                                                 | 0.0022 | -1.30 | Normal down vs > 5 Years Off IS Tolerant |
| 227930_PM_at    | EIF2C4           | Eukaryotic translation initiation factor 2C, 4                                          | 0.0022 | -1.40 | Normal down vs > 5 Years Off IS Tolerant |
| 227776_PM_at    | ACER3            | alkaline ceramidase 3                                                                   | 0.0022 | -1.51 | Normal down vs > 5 Years Off IS Tolerant |
| 212374_PM_at    | FEM1B            | fem-1 homolog b (C. elegans)                                                            | 0.0022 | 2.01  | Normal up vs > 5 Years Off IS Tolerant   |
| 1554006_PM_a_at | LLGL2            | lethal giant larvae homolog 2 (Drosophila)                                              | 0.0022 | 1.54  | Normal up vs > 5 Years Off IS Tolerant   |
| 200013_PM_at    | RPL24            | ribosomal protein L24                                                                   | 0.0022 | 1.23  | Normal up vs > 5 Years Off IS Tolerant   |
| 222002_PM_at    | C7orf26          | Chromosome 7 open reading frame 26                                                      | 0.0022 | -1.33 | Normal down vs > 5 Years Off IS Tolerant |
| 240890_PM_at    | LOC643733        | caspase 4, apoptosis-related cysteine peptidase pseudogene                              | 0.0022 | 1.96  | Normal up vs > 5 Years Off IS Tolerant   |
| 226679_PM_at    | SLC26A11         | solute carrier family 26, member 11                                                     | 0.0022 | 1.48  | Normal up vs > 5 Years Off IS Tolerant   |
| 222924_PM_at    | SLMAP            | sarcolemma associated protein                                                           | 0.0022 | 1.91  | Normal up vs > 5 Years Off IS Tolerant   |
| 219916_PM_s_at  | RNF39            | ring finger protein 39                                                                  | 0.0022 | -1.31 | Normal down vs > 5 Years Off IS Tolerant |
| 208024_PM_s_at  | DGCR6 /// DGCR6L | DiGeorge syndrome critical region gene 6 /// DiGeorge syndrome critical region gene 6-l | 0.0022 | 1.53  | Normal up vs > 5 Years Off IS Tolerant   |
| 227255_PM_at    | PDIK1L           | PDLIM1 interacting kinase 1 like                                                        | 0.0022 | 1.71  | Normal up vs > 5 Years Off IS Tolerant   |
| 91617_PM_at     | DGCR8            | DiGeorge syndrome critical region gene 8                                                | 0.0022 | 1.64  | Normal up vs > 5 Years Off IS Tolerant   |
| 205583_PM_s_at  | ALG13            | asparagine-linked glycosylation 13 homolog (S. cerevisiae)                              | 0.0022 | 1.63  | Normal up vs > 5 Years Off IS Tolerant   |
| 213485_PM_s_at  | ABCC10           | ATP-binding cassette, sub-family C (CFTR/MRP), member 10                                | 0.0022 | 1.56  | Normal up vs > 5 Years Off IS Tolerant   |
| 220132_PM_s_at  | CLEC2D           | C-type lectin domain family 2, member D                                                 | 0.0022 | 2.09  | Normal up vs > 5 Years Off IS Tolerant   |
| 201630_PM_s_at  | ACP1             | acid phosphatase 1, soluble                                                             | 0.0022 | 1.47  | Normal up vs > 5 Years Off IS Tolerant   |



|                 |                               |                                                                    |        |       |                                          |
|-----------------|-------------------------------|--------------------------------------------------------------------|--------|-------|------------------------------------------|
| 219642_PM_s_at  | PEX5L                         | peroxisomal biogenesis factor 5-like                               | 0.0022 | -1.47 | Normal down vs > 5 Years Off IS Tolerant |
| 210083_PM_at    | SEMA7A                        | semaphorin 7A, GPI membrane anchor (John Milton Hagen blood group) | 0.0022 | -1.45 | Normal down vs > 5 Years Off IS Tolerant |
| 1564670_PM_at   | LOC100190938                  | hypothetical LOC100190938                                          | 0.0022 | -1.32 | Normal down vs > 5 Years Off IS Tolerant |
| 222812_PM_s_at  | RHOF                          | ras homolog gene family, member F (in filopodia)                   | 0.0022 | 1.61  | Normal up vs > 5 Years Off IS Tolerant   |
| 243405_PM_at    | ---                           | ---                                                                | 0.0022 | -1.73 | Normal down vs > 5 Years Off IS Tolerant |
| 1553702_PM_at   | ZNF697                        | zinc finger protein 697                                            | 0.0022 | -1.31 | Normal down vs > 5 Years Off IS Tolerant |
| 231998_PM_at    | ---                           | ---                                                                | 0.0022 | -1.39 | Normal down vs > 5 Years Off IS Tolerant |
| 231612_PM_at    | C4orf35                       | chromosome 4 open reading frame 35                                 | 0.0022 | -1.25 | Normal down vs > 5 Years Off IS Tolerant |
| 227704_PM_at    | C19orf12                      | chromosome 19 open reading frame 12                                | 0.0022 | 1.58  | Normal up vs > 5 Years Off IS Tolerant   |
| 1559471_PM_s_at | D21S2088E                     | D21S2088E                                                          | 0.0022 | -1.62 | Normal down vs > 5 Years Off IS Tolerant |
| 1565768_PM_at   | ---                           | ---                                                                | 0.0022 | -1.45 | Normal down vs > 5 Years Off IS Tolerant |
| 1555689_PM_at   | CD80                          | CD80 molecule                                                      | 0.0022 | 1.48  | Normal up vs > 5 Years Off IS Tolerant   |
| 203752_PM_s_at  | JUND                          | jun D proto-oncogene                                               | 0.0022 | 1.52  | Normal up vs > 5 Years Off IS Tolerant   |
| 238315_PM_s_at  | ZNF567                        | zinc finger protein 567                                            | 0.0022 | 1.70  | Normal up vs > 5 Years Off IS Tolerant   |
| 236709_PM_at    | ---                           | ---                                                                | 0.0022 | -1.35 | Normal down vs > 5 Years Off IS Tolerant |
| 226137_PM_at    | ZFH3                          | zinc finger homeobox 3                                             | 0.0022 | -1.62 | Normal down vs > 5 Years Off IS Tolerant |
| 223227_PM_at    | BBS2                          | Bardet-Biedl syndrome 2                                            | 0.0022 | 1.85  | Normal up vs > 5 Years Off IS Tolerant   |
| 1564277_PM_a_at | LOC100133920 ///<br>LOC286297 | hypothetical LOC100133920 /// hypothetical<br>LOC286297            | 0.0022 | -1.63 | Normal down vs > 5 Years Off IS Tolerant |
| 222322_PM_at    | ---                           | ---                                                                | 0.0022 | -1.74 | Normal down vs > 5 Years Off IS Tolerant |
| 210105_PM_s_at  | FYN                           | FYN oncogene related to SRC, FGR, YES                              | 0.0022 | 1.30  | Normal up vs > 5 Years Off IS Tolerant   |
| 225497_PM_at    | ATE1                          | arginyltransferase 1                                               | 0.0022 | 1.73  | Normal up vs > 5 Years Off IS Tolerant   |
| 220618_PM_s_at  | ZCWPW1                        | zinc finger, CW type with PWWP domain 1                            | 0.0022 | 1.49  | Normal up vs > 5 Years Off IS Tolerant   |
| 215042_PM_at    | BMP6                          | bone morphogenetic protein 6                                       | 0.0022 | -1.31 | Normal down vs > 5 Years Off IS Tolerant |
| 221751_PM_at    | PANK3                         | pantothenate kinase 3                                              | 0.0022 | 1.25  | Normal up vs > 5 Years Off IS Tolerant   |
| 212615_PM_at    | CHD9                          | chromodomain helicase DNA binding protein 9                        | 0.0022 | 1.38  | Normal up vs > 5 Years Off IS Tolerant   |

|                |                                                                                                |                                                                                            |        |       |                                          |
|----------------|------------------------------------------------------------------------------------------------|--------------------------------------------------------------------------------------------|--------|-------|------------------------------------------|
| 203374_PM_s_at | TPP2                                                                                           | tripeptidyl peptidase II                                                                   | 0.0022 | 1.49  | Normal up vs > 5 Years Off IS Tolerant   |
| 1561731_PM_at  | ---                                                                                            | ---                                                                                        | 0.0022 | -2.12 | Normal down vs > 5 Years Off IS Tolerant |
| 234668_PM_at   | ---                                                                                            | ---                                                                                        | 0.0022 | -1.59 | Normal down vs > 5 Years Off IS Tolerant |
| 209796_PM_s_at | CNPY2                                                                                          | canopy 2 homolog (zebrafish)                                                               | 0.0022 | 1.85  | Normal up vs > 5 Years Off IS Tolerant   |
| 217485_PM_x_at | LOC100289811 ///<br>LOC441259 ///<br>PMS2 /// PMS2L2<br>/// PMS2P1 ///<br>PMS2P5 ///<br>PMS2P6 | mismatch repair endonuclease PMS2-like /// PMS2<br>postmeiotic segregation increased 2 (S. | 0.0022 | 1.47  | Normal up vs > 5 Years Off IS Tolerant   |
| 220567_PM_at   | IKZF2                                                                                          | IKAROS family zinc finger 2 (Helios)                                                       | 0.0022 | -1.60 | Normal down vs > 5 Years Off IS Tolerant |
| 230452_PM_at   | FLJ42351                                                                                       | hypothetical LOC400999                                                                     | 0.0022 | 1.60  | Normal up vs > 5 Years Off IS Tolerant   |
| 205726_PM_at   | DIAPH2                                                                                         | diaphanous homolog 2 (Drosophila)                                                          | 0.0022 | -1.82 | Normal down vs > 5 Years Off IS Tolerant |
| 35671_PM_at    | GTF3C1                                                                                         | general transcription factor IIC, polypeptide 1, alpha<br>220kDa                           | 0.0022 | 1.58  | Normal up vs > 5 Years Off IS Tolerant   |
| 226420_PM_at   | MECOM                                                                                          | MDS1 and EVI1 complex locus                                                                | 0.0022 | -1.99 | Normal down vs > 5 Years Off IS Tolerant |
| 222035_PM_s_at | PAPOLA                                                                                         | poly(A) polymerase alpha                                                                   | 0.0022 | 1.49  | Normal up vs > 5 Years Off IS Tolerant   |
| 211360_PM_s_at | ITPR2                                                                                          | inositol 1,4,5-triphosphate receptor, type 2                                               | 0.0022 | -1.53 | Normal down vs > 5 Years Off IS Tolerant |
| 239131_PM_at   | ---                                                                                            | ---                                                                                        | 0.0022 | 2.01  | Normal up vs > 5 Years Off IS Tolerant   |
| 214452_PM_at   | BCAT1                                                                                          | branched chain amino-acid transaminase 1, cytosolic                                        | 0.0022 | -2.20 | Normal down vs > 5 Years Off IS Tolerant |
| 202547_PM_s_at | ARHGEF7                                                                                        | Rho guanine nucleotide exchange factor (GEF) 7                                             | 0.0022 | 1.85  | Normal up vs > 5 Years Off IS Tolerant   |
| 207160_PM_at   | IL12A                                                                                          | interleukin 12A (natural killer cell stimulatory factor 1,<br>cytotoxic lymphocyte maturat | 0.0022 | 1.47  | Normal up vs > 5 Years Off IS Tolerant   |
| 242035_PM_at   | ---                                                                                            | ---                                                                                        | 0.0022 | 1.84  | Normal up vs > 5 Years Off IS Tolerant   |
| 232765_PM_x_at | LOC146429                                                                                      | putative solute carrier family 22 member<br>ENSG00000182157                                | 0.0022 | -1.45 | Normal down vs > 5 Years Off IS Tolerant |
| 231016_PM_s_at | ARNT                                                                                           | Aryl hydrocarbon receptor nuclear translocator                                             | 0.0022 | -1.51 | Normal down vs > 5 Years Off IS Tolerant |
| 201776_PM_s_at | KIAA0494                                                                                       | KIAA0494                                                                                   | 0.0022 | 1.83  | Normal up vs > 5 Years Off IS Tolerant   |
| 214290_PM_s_at | HIST2H2AA3 ///<br>HIST2H2AA4                                                                   | histone cluster 2, H2aa3 /// histone cluster 2, H2aa4                                      | 0.0022 | 1.57  | Normal up vs > 5 Years Off IS Tolerant   |

|                |              |                                                            |        |       |                                          |
|----------------|--------------|------------------------------------------------------------|--------|-------|------------------------------------------|
| 240587_PM_x_at | LOC100508341 | hypothetical LOC100508341                                  | 0.0022 | -1.38 | Normal down vs > 5 Years Off IS Tolerant |
| 209194_PM_at   | CETN2        | centrin, EF-hand protein, 2                                | 0.0022 | 1.66  | Normal up vs > 5 Years Off IS Tolerant   |
| 203692_PM_s_at | E2F3         | E2F transcription factor 3                                 | 0.0022 | -1.48 | Normal down vs > 5 Years Off IS Tolerant |
| 1561327_PM_at  | NCRNA00242   | non-protein coding RNA 242                                 | 0.0022 | -1.50 | Normal down vs > 5 Years Off IS Tolerant |
| 228736_PM_at   | HELQ         | helicase, POLQ-like                                        | 0.0022 | 1.74  | Normal up vs > 5 Years Off IS Tolerant   |
| 238325_PM_s_at | ODF3B        | outer dense fiber of sperm tails 3B                        | 0.0022 | -1.56 | Normal down vs > 5 Years Off IS Tolerant |
| 215845_PM_x_at | ---          | ---                                                        | 0.0022 | -1.51 | Normal down vs > 5 Years Off IS Tolerant |
| 203683_PM_s_at | VEGFB        | vascular endothelial growth factor B                       | 0.0022 | 1.40  | Normal up vs > 5 Years Off IS Tolerant   |
| 214663_PM_at   | DSTYK        | dual serine/threonine and tyrosine protein kinase          | 0.0022 | 1.96  | Normal up vs > 5 Years Off IS Tolerant   |
| 215691_PM_x_at | HSPB11       | heat shock protein family B (small), member 11             | 0.0022 | 1.44  | Normal up vs > 5 Years Off IS Tolerant   |
| 204040_PM_at   | RNF144A      | ring finger protein 144A                                   | 0.0022 | 1.99  | Normal up vs > 5 Years Off IS Tolerant   |
| 1569834_PM_at  | ---          | ---                                                        | 0.0022 | -1.65 | Normal down vs > 5 Years Off IS Tolerant |
| 226520_PM_at   | LCOR         | ligand dependent nuclear receptor corepressor              | 0.0022 | 1.46  | Normal up vs > 5 Years Off IS Tolerant   |
| 227775_PM_at   | CELF6        | CUGBP, Elav-like family member 6                           | 0.0022 | 1.48  | Normal up vs > 5 Years Off IS Tolerant   |
| 226921_PM_at   | UBR1         | ubiquitin protein ligase E3 component n-recogin 1          | 0.0022 | 1.62  | Normal up vs > 5 Years Off IS Tolerant   |
| 1560609_PM_at  | CRYZL1       | crystallin, zeta (quinone reductase)-like 1                | 0.0022 | -1.35 | Normal down vs > 5 Years Off IS Tolerant |
| 235649_PM_at   | ADAMTS8      | ADAM metalloproteinase with thrombospondin type 1 motif, 8 | 0.0023 | -1.34 | Normal down vs > 5 Years Off IS Tolerant |
| 1560086_PM_at  | ---          | ---                                                        | 0.0023 | -1.65 | Normal down vs > 5 Years Off IS Tolerant |
| 237202_PM_at   | PGPEP1       | pyroglutamyl-peptidase I                                   | 0.0023 | -1.45 | Normal down vs > 5 Years Off IS Tolerant |
| 223734_PM_at   | C4orf49      | chromosome 4 open reading frame 49                         | 0.0023 | -1.46 | Normal down vs > 5 Years Off IS Tolerant |
| 238581_PM_at   | GBP5         | guanylate binding protein 5                                | 0.0023 | 2.38  | Normal up vs > 5 Years Off IS Tolerant   |
| 227438_PM_at   | ALPK1        | alpha-kinase 1                                             | 0.0023 | -1.56 | Normal down vs > 5 Years Off IS Tolerant |
| 226202_PM_at   | ZNF398       | zinc finger protein 398                                    | 0.0023 | 1.86  | Normal up vs > 5 Years Off IS Tolerant   |
| 240649_PM_at   | ---          | ---                                                        | 0.0023 | -1.51 | Normal down vs > 5 Years Off IS Tolerant |
| 1563073_PM_at  | ---          | ---                                                        | 0.0023 | -1.30 | Normal down vs > 5 Years Off IS Tolerant |

|                 |          |                                                                   |        |       |                                          |
|-----------------|----------|-------------------------------------------------------------------|--------|-------|------------------------------------------|
| 207010_PM_at    | GABRB1   | gamma-aminobutyric acid (GABA) A receptor, beta 1                 | 0.0023 | -1.73 | Normal down vs > 5 Years Off IS Tolerant |
| 238209_PM_at    | ---      | ---                                                               | 0.0023 | -1.43 | Normal down vs > 5 Years Off IS Tolerant |
| 224768_PM_at    | IWS1     | IWS1 homolog (S. cerevisiae)                                      | 0.0023 | 1.54  | Normal up vs > 5 Years Off IS Tolerant   |
| 242933_PM_at    | ---      | ---                                                               | 0.0023 | -1.34 | Normal down vs > 5 Years Off IS Tolerant |
| 1570517_PM_at   | FHL5     | four and a half LIM domains 5                                     | 0.0023 | -1.97 | Normal down vs > 5 Years Off IS Tolerant |
| 205076_PM_s_at  | MTMR11   | myotubularin related protein 11                                   | 0.0023 | -1.74 | Normal down vs > 5 Years Off IS Tolerant |
| 1553696_PM_s_at | ZNF569   | zinc finger protein 569                                           | 0.0023 | 1.33  | Normal up vs > 5 Years Off IS Tolerant   |
| 210622_PM_x_at  | CDK10    | cyclin-dependent kinase 10                                        | 0.0023 | 1.99  | Normal up vs > 5 Years Off IS Tolerant   |
| 1554015_PM_a_at | CHD2     | chromodomain helicase DNA binding protein 2                       | 0.0023 | 1.60  | Normal up vs > 5 Years Off IS Tolerant   |
| 218698_PM_at    | APIP     | APAF1 interacting protein                                         | 0.0023 | -1.43 | Normal down vs > 5 Years Off IS Tolerant |
| 1565661_PM_x_at | FUT6     | Fucosyltransferase 6 (alpha (1,3) fucosyltransferase)             | 0.0023 | -1.28 | Normal down vs > 5 Years Off IS Tolerant |
| 210740_PM_s_at  | ITPK1    | inositol 1,3,4-triphosphate 5/6 kinase                            | 0.0023 | -1.31 | Normal down vs > 5 Years Off IS Tolerant |
| 225438_PM_at    | NUDCD1   | NudC domain containing 1                                          | 0.0023 | -1.38 | Normal down vs > 5 Years Off IS Tolerant |
| 239681_PM_at    | C17orf56 | chromosome 17 open reading frame 56                               | 0.0023 | -1.40 | Normal down vs > 5 Years Off IS Tolerant |
| 202340_PM_x_at  | NR4A1    | nuclear receptor subfamily 4, group A, member 1                   | 0.0023 | 2.62  | Normal up vs > 5 Years Off IS Tolerant   |
| 1557224_PM_at   | ---      | ---                                                               | 0.0023 | 1.73  | Normal up vs > 5 Years Off IS Tolerant   |
| 237921_PM_at    | ---      | ---                                                               | 0.0023 | -1.33 | Normal down vs > 5 Years Off IS Tolerant |
| 205171_PM_at    | PTPN4    | protein tyrosine phosphatase, non-receptor type 4 (megakaryocyte) | 0.0023 | 1.81  | Normal up vs > 5 Years Off IS Tolerant   |
| 228211_PM_at    | C9orf102 | chromosome 9 open reading frame 102                               | 0.0023 | 1.46  | Normal up vs > 5 Years Off IS Tolerant   |
| 229661_PM_at    | SALL4    | sal-like 4 (Drosophila)                                           | 0.0023 | -1.43 | Normal down vs > 5 Years Off IS Tolerant |
| 239643_PM_at    | ---      | ---                                                               | 0.0023 | -1.43 | Normal down vs > 5 Years Off IS Tolerant |
| 242103_PM_at    | TMEM86A  | transmembrane protein 86A                                         | 0.0023 | -1.33 | Normal down vs > 5 Years Off IS Tolerant |
| 212477_PM_at    | ACAP2    | ArfGAP with coiled-coil, ankyrin repeat and PH domains 2          | 0.0023 | -1.37 | Normal down vs > 5 Years Off IS Tolerant |

|                 |          |                                                          |        |       |                                          |
|-----------------|----------|----------------------------------------------------------|--------|-------|------------------------------------------|
| 220935_PM_s_at  | CDK5RAP2 | CDK5 regulatory subunit associated protein 2             | 0.0023 | 1.43  | Normal up vs > 5 Years Off IS Tolerant   |
| 219348_PM_at    | USE1     | unconventional SNARE in the ER 1 homolog (S. cerevisiae) | 0.0023 | 1.51  | Normal up vs > 5 Years Off IS Tolerant   |
| 202267_PM_at    | LAMC2    | laminin, gamma 2                                         | 0.0023 | -1.31 | Normal down vs > 5 Years Off IS Tolerant |
| 234669_PM_x_at  | C11orf30 | chromosome 11 open reading frame 30                      | 0.0023 | -1.39 | Normal down vs > 5 Years Off IS Tolerant |
| 215687_PM_x_at  | PLCB1    | phospholipase C, beta 1 (phosphoinositide-specific)      | 0.0023 | -1.35 | Normal down vs > 5 Years Off IS Tolerant |
| 226098_PM_at    | IFT80    | intraflagellar transport 80 homolog (Chlamydomonas)      | 0.0023 | 1.55  | Normal up vs > 5 Years Off IS Tolerant   |
| 213171_PM_s_at  | MMP24    | matrix metalloproteinase 24 (membrane-inserted)          | 0.0023 | -1.35 | Normal down vs > 5 Years Off IS Tolerant |
| 227595_PM_at    | ZMYM6    | zinc finger, MYM-type 6                                  | 0.0023 | 1.92  | Normal up vs > 5 Years Off IS Tolerant   |
| 243869_PM_at    | ---      | ---                                                      | 0.0023 | 1.58  | Normal up vs > 5 Years Off IS Tolerant   |
| 205524_PM_s_at  | HAPLN1   | hyaluronan and proteoglycan link protein 1               | 0.0023 | -1.37 | Normal down vs > 5 Years Off IS Tolerant |
| 225513_PM_at    | SCRN2    | secernin 2                                               | 0.0023 | -1.56 | Normal down vs > 5 Years Off IS Tolerant |
| 1560637_PM_at   | ---      | ---                                                      | 0.0023 | -1.50 | Normal down vs > 5 Years Off IS Tolerant |
| 1553356_PM_at   | ---      | ---                                                      | 0.0023 | -1.33 | Normal down vs > 5 Years Off IS Tolerant |
| 1564868_PM_a_at | FAM117B  | family with sequence similarity 117, member B            | 0.0023 | 1.45  | Normal up vs > 5 Years Off IS Tolerant   |
| 236587_PM_at    | ---      | ---                                                      | 0.0023 | -1.45 | Normal down vs > 5 Years Off IS Tolerant |
| 203645_PM_s_at  | CD163    | CD163 molecule                                           | 0.0023 | -1.83 | Normal down vs > 5 Years Off IS Tolerant |
| 210884_PM_s_at  | SPAG11A  | sperm associated antigen 11A                             | 0.0023 | -1.34 | Normal down vs > 5 Years Off IS Tolerant |
| 217580_PM_x_at  | ---      | ---                                                      | 0.0023 | -1.89 | Normal down vs > 5 Years Off IS Tolerant |
| 209989_PM_at    | ZNF268   | zinc finger protein 268                                  | 0.0023 | 1.93  | Normal up vs > 5 Years Off IS Tolerant   |
| 1563344_PM_at   | ---      | ---                                                      | 0.0023 | -1.38 | Normal down vs > 5 Years Off IS Tolerant |
| 1560989_PM_at   | ---      | ---                                                      | 0.0023 | -1.44 | Normal down vs > 5 Years Off IS Tolerant |
| 219305_PM_x_at  | FBXO2    | F-box protein 2                                          | 0.0023 | 1.43  | Normal up vs > 5 Years Off IS Tolerant   |
| 219016_PM_at    | FASTKD5  | FAST kinase domains 5                                    | 0.0023 | 1.46  | Normal up vs > 5 Years Off IS Tolerant   |

|                      |                                    |                                                                                           |        |       |                                          |
|----------------------|------------------------------------|-------------------------------------------------------------------------------------------|--------|-------|------------------------------------------|
| 210334_PM_x_at       | BIRC5                              | baculoviral IAP repeat-containing 5                                                       | 0.0023 | -1.47 | Normal down vs > 5 Years Off IS Tolerant |
| 1557077_PM_a_at      | ---                                | ---                                                                                       | 0.0023 | -1.32 | Normal down vs > 5 Years Off IS Tolerant |
| 223849_PM_s_at       | MOV10                              | Mov10, Moloney leukemia virus 10, homolog (mouse)                                         | 0.0023 | 1.78  | Normal up vs > 5 Years Off IS Tolerant   |
| 213371_PM_at         | LDB3                               | LIM domain binding 3                                                                      | 0.0023 | -1.39 | Normal down vs > 5 Years Off IS Tolerant |
| 216730_PM_at         | ---                                | ---                                                                                       | 0.0023 | -1.45 | Normal down vs > 5 Years Off IS Tolerant |
| 211794_PM_at         | FYB                                | FYN binding protein                                                                       | 0.0023 | -1.58 | Normal down vs > 5 Years Off IS Tolerant |
| 227508_PM_at         | ---                                | ---                                                                                       | 0.0023 | 1.68  | Normal up vs > 5 Years Off IS Tolerant   |
| 241355_PM_at         | HR                                 | hairless homolog (mouse)                                                                  | 0.0023 | -1.33 | Normal down vs > 5 Years Off IS Tolerant |
| 231978_PM_at         | TPCN2                              | two pore segment channel 2                                                                | 0.0023 | 1.42  | Normal up vs > 5 Years Off IS Tolerant   |
| 207721_PM_x_at       | HINT1                              | histidine triad nucleotide binding protein 1                                              | 0.0023 | 1.44  | Normal up vs > 5 Years Off IS Tolerant   |
| 233076_PM_at         | JAKMIP3                            | Janus kinase and microtubule interacting protein 3                                        | 0.0023 | -1.41 | Normal down vs > 5 Years Off IS Tolerant |
| 208281_PM_x_at       | DAZ1 /// DAZ2 ///<br>DAZ3 /// DAZ4 | deleted in azoospermia 1 /// deleted in azoospermia 2<br>/// deleted in azoospermia 3 /// | 0.0023 | -2.81 | Normal down vs > 5 Years Off IS Tolerant |
| 1559715_PM_at        | ---                                | ---                                                                                       | 0.0023 | -1.38 | Normal down vs > 5 Years Off IS Tolerant |
| 200007_PM_at         | SRP14                              | signal recognition particle 14kDa (homologous Alu RNA binding protein)                    | 0.0023 | 1.28  | Normal up vs > 5 Years Off IS Tolerant   |
| 227645_PM_at         | PIK3R5                             | phosphoinositide-3-kinase, regulatory subunit 5                                           | 0.0023 | 1.41  | Normal up vs > 5 Years Off IS Tolerant   |
| 1565811_PM_at        | ---                                | ---                                                                                       | 0.0023 | -1.62 | Normal down vs > 5 Years Off IS Tolerant |
| 238608_PM_at         | ---                                | ---                                                                                       | 0.0023 | -1.55 | Normal down vs > 5 Years Off IS Tolerant |
| 236567_PM_at         | ---                                | ---                                                                                       | 0.0023 | -1.37 | Normal down vs > 5 Years Off IS Tolerant |
| 207882_PM_at         | ---                                | ---                                                                                       | 0.0024 | -1.34 | Normal down vs > 5 Years Off IS Tolerant |
| 226431_PM_at         | FAM117B                            | family with sequence similarity 117, member B                                             | 0.0024 | 1.55  | Normal up vs > 5 Years Off IS Tolerant   |
| 218516_PM_s_at       | IMPAD1                             | inositol monophosphatase domain containing 1                                              | 0.0024 | 2.23  | Normal up vs > 5 Years Off IS Tolerant   |
| 209984_PM_at         | KDM4C                              | lysine (K)-specific demethylase 4C                                                        | 0.0024 | 1.45  | Normal up vs > 5 Years Off IS Tolerant   |
| AFFX-r2-Ec-bioB-3_at | ---                                | ---                                                                                       | 0.0024 | -2.35 | Normal down vs > 5 Years Off IS Tolerant |

|                 |           |                                                                                         |        |       |                                          |
|-----------------|-----------|-----------------------------------------------------------------------------------------|--------|-------|------------------------------------------|
| 225309_PM_at    | PHF5A     | PHD finger protein 5A                                                                   | 0.0024 | 1.38  | Normal up vs > 5 Years Off IS Tolerant   |
| 205518_PM_s_at  | CMAH      | cytidine monophosphate-N-acetylneuraminic acid hydroxylase (CMP-N-acetylneuraminate mon | 0.0024 | 1.75  | Normal up vs > 5 Years Off IS Tolerant   |
| 240581_PM_at    | ---       | ---                                                                                     | 0.0024 | 1.28  | Normal up vs > 5 Years Off IS Tolerant   |
| 244240_PM_at    | ---       | ---                                                                                     | 0.0024 | -1.52 | Normal down vs > 5 Years Off IS Tolerant |
| 241558_PM_at    | ---       | ---                                                                                     | 0.0024 | -1.65 | Normal down vs > 5 Years Off IS Tolerant |
| 206681_PM_x_at  | GP2       | glycoprotein 2 (zymogen granule membrane)                                               | 0.0024 | -1.44 | Normal down vs > 5 Years Off IS Tolerant |
| 236181_PM_at    | LOC389831 | Hypothetical gene supported by AL713796                                                 | 0.0024 | -1.54 | Normal down vs > 5 Years Off IS Tolerant |
| 203526_PM_s_at  | APC       | adenomatous polyposis coli                                                              | 0.0024 | 2.02  | Normal up vs > 5 Years Off IS Tolerant   |
| 212584_PM_at    | AQR       | aquarius homolog (mouse)                                                                | 0.0024 | 1.42  | Normal up vs > 5 Years Off IS Tolerant   |
| 213689_PM_x_at  | FAM69A    | family with sequence similarity 69, member A                                            | 0.0024 | 1.88  | Normal up vs > 5 Years Off IS Tolerant   |
| 217171_PM_at    | SMPD1     | sphingomyelin phosphodiesterase 1, acid lysosomal                                       | 0.0024 | -1.36 | Normal down vs > 5 Years Off IS Tolerant |
| 222064_PM_s_at  | AARSD1    | alanyl-tRNA synthetase domain containing 1                                              | 0.0024 | 1.45  | Normal up vs > 5 Years Off IS Tolerant   |
| 1564757_PM_a_at | CCDC148   | coiled-coil domain containing 148                                                       | 0.0024 | -1.74 | Normal down vs > 5 Years Off IS Tolerant |
| 244407_PM_at    | CYP39A1   | cytochrome P450, family 39, subfamily A, polypeptide 1                                  | 0.0024 | -1.62 | Normal down vs > 5 Years Off IS Tolerant |
| 243688_PM_at    | MGC45800  | hypothetical LOC90768                                                                   | 0.0024 | -1.31 | Normal down vs > 5 Years Off IS Tolerant |
| 228574_PM_at    | TMTC2     | Transmembrane and tetratricopeptide repeat containing 2                                 | 0.0024 | -1.70 | Normal down vs > 5 Years Off IS Tolerant |
| 234967_PM_at    | IL6ST     | interleukin 6 signal transducer (gp130, oncostatin M receptor)                          | 0.0024 | 1.41  | Normal up vs > 5 Years Off IS Tolerant   |
| 240772_PM_at    | ---       | ---                                                                                     | 0.0024 | -1.92 | Normal down vs > 5 Years Off IS Tolerant |
| 1569522_PM_at   | ---       | ---                                                                                     | 0.0024 | -1.54 | Normal down vs > 5 Years Off IS Tolerant |
| 226124_PM_at    | ZFP90     | zinc finger protein 90 homolog (mouse)                                                  | 0.0024 | 1.72  | Normal up vs > 5 Years Off IS Tolerant   |
| 241030_PM_at    | ---       | ---                                                                                     | 0.0024 | -1.91 | Normal down vs > 5 Years Off IS Tolerant |
| 212033_PM_at    | RBM25     | RNA binding motif protein 25                                                            | 0.0024 | 1.29  | Normal up vs > 5 Years Off IS Tolerant   |
| 212695_PM_at    | CRY2      | cryptochrome 2 (photolyase-like)                                                        | 0.0024 | 1.64  | Normal up vs > 5 Years Off IS Tolerant   |
| 241900_PM_at    | ---       | ---                                                                                     | 0.0024 | -1.41 | Normal down vs > 5 Years Off IS Tolerant |

|                 |           |                                                |        |       |                                          |
|-----------------|-----------|------------------------------------------------|--------|-------|------------------------------------------|
| 1559652_PM_at   | ---       | ---                                            | 0.0024 | -1.37 | Normal down vs > 5 Years Off IS Tolerant |
| 240175_PM_at    | ---       | ---                                            | 0.0024 | -1.47 | Normal down vs > 5 Years Off IS Tolerant |
| 219762_PM_s_at  | RPL36     | ribosomal protein L36                          | 0.0024 | 1.37  | Normal up vs > 5 Years Off IS Tolerant   |
| 234018_PM_s_at  | SEL1L2    | sel-1 suppressor of lin-12-like 2 (C. elegans) | 0.0024 | -1.44 | Normal down vs > 5 Years Off IS Tolerant |
| 214443_PM_at    | PVR       | poliovirus receptor                            | 0.0024 | -1.26 | Normal down vs > 5 Years Off IS Tolerant |
| 213680_PM_at    | KRT6B     | keratin 6B                                     | 0.0024 | -1.31 | Normal down vs > 5 Years Off IS Tolerant |
| 208258_PM_s_at  | GAS2L1    | growth arrest-specific 2 like 1                | 0.0024 | -1.28 | Normal down vs > 5 Years Off IS Tolerant |
| 1560477_PM_a_at | SAMD11    | sterile alpha motif domain containing 11       | 0.0024 | -1.35 | Normal down vs > 5 Years Off IS Tolerant |
| 230615_PM_at    | DUOXA2    | dual oxidase maturation factor 2               | 0.0024 | -1.45 | Normal down vs > 5 Years Off IS Tolerant |
| 205601_PM_s_at  | HOXB5     | homeobox B5                                    | 0.0024 | -1.35 | Normal down vs > 5 Years Off IS Tolerant |
| 1564475_PM_s_at | LOC728723 | hypothetical LOC728723                         | 0.0024 | -1.33 | Normal down vs > 5 Years Off IS Tolerant |
| 224088_PM_at    | NMUR2     | neuromedin U receptor 2                        | 0.0024 | -1.38 | Normal down vs > 5 Years Off IS Tolerant |
| 224780_PM_at    | RBM17     | RNA binding motif protein 17                   | 0.0024 | 1.30  | Normal up vs > 5 Years Off IS Tolerant   |
| 228505_PM_s_at  | TMEM170A  | transmembrane protein 170A                     | 0.0024 | 2.06  | Normal up vs > 5 Years Off IS Tolerant   |
| 44111_PM_at     | VPS33B    | vacuolar protein sorting 33 homolog B (yeast)  | 0.0024 | 1.36  | Normal up vs > 5 Years Off IS Tolerant   |
| 238349_PM_at    | UBN2      | ubiquitin 2                                    | 0.0024 | -1.47 | Normal down vs > 5 Years Off IS Tolerant |
| 1553471_PM_at   | AMAC1     | acyl-malonyl condensing enzyme 1               | 0.0024 | -1.52 | Normal down vs > 5 Years Off IS Tolerant |
| 1569057_PM_s_at | MIA3      | melanoma inhibitory activity family, member 3  | 0.0024 | 1.49  | Normal up vs > 5 Years Off IS Tolerant   |
| 228902_PM_at    | NUP214    | nucleoporin 214kDa                             | 0.0024 | -1.51 | Normal down vs > 5 Years Off IS Tolerant |
| 237124_PM_at    | ---       | ---                                            | 0.0024 | -1.42 | Normal down vs > 5 Years Off IS Tolerant |
| 217282_PM_at    | MAN1A2    | mannosidase, alpha, class 1A, member 2         | 0.0024 | -1.50 | Normal down vs > 5 Years Off IS Tolerant |
| 234805_PM_at    | ---       | ---                                            | 0.0024 | -1.88 | Normal down vs > 5 Years Off IS Tolerant |



|                 |         |                                                                                         |        |       |                                          |
|-----------------|---------|-----------------------------------------------------------------------------------------|--------|-------|------------------------------------------|
| 220475_PM_at    | SLC28A3 | solute carrier family 28 (sodium-coupled nucleoside transporter), member 3              | 0.0024 | -1.41 | Normal down vs > 5 Years Off IS Tolerant |
| 222788_PM_s_at  | RSBN1   | round spermatid basic protein 1                                                         | 0.0025 | 1.32  | Normal up vs > 5 Years Off IS Tolerant   |
| 221620_PM_s_at  | APOO    | apolipoprotein O                                                                        | 0.0025 | 1.64  | Normal up vs > 5 Years Off IS Tolerant   |
| 220116_PM_at    | KCNN2   | potassium intermediate/small conductance calcium-activated channel, subfamily N, member | 0.0025 | -1.82 | Normal down vs > 5 Years Off IS Tolerant |
| 230946_PM_at    | FMN2    | Formin 2                                                                                | 0.0025 | -1.37 | Normal down vs > 5 Years Off IS Tolerant |
| 233915_PM_at    | C5orf36 | chromosome 5 open reading frame 36                                                      | 0.0025 | -1.24 | Normal down vs > 5 Years Off IS Tolerant |
| 202167_PM_s_at  | MMS19   | MMS19 nucleotide excision repair homolog (S. cerevisiae)                                | 0.0025 | 1.51  | Normal up vs > 5 Years Off IS Tolerant   |
| 231155_PM_at    | DEFB119 | defensin, beta 119                                                                      | 0.0025 | -1.50 | Normal down vs > 5 Years Off IS Tolerant |
| 212234_PM_at    | ASXL1   | additional sex combs like 1 (Drosophila)                                                | 0.0025 | 1.48  | Normal up vs > 5 Years Off IS Tolerant   |
| 206444_PM_at    | PDE1B   | phosphodiesterase 1B, calmodulin-dependent                                              | 0.0025 | -1.43 | Normal down vs > 5 Years Off IS Tolerant |
| 232134_PM_at    | ---     | ---                                                                                     | 0.0025 | 1.78  | Normal up vs > 5 Years Off IS Tolerant   |
| 208994_PM_s_at  | PPIG    | peptidylprolyl isomerase G (cyclophilin G)                                              | 0.0025 | 1.36  | Normal up vs > 5 Years Off IS Tolerant   |
| 232842_PM_at    | DOCK8   | dedicator of cytokinesis 8                                                              | 0.0025 | -1.43 | Normal down vs > 5 Years Off IS Tolerant |
| 201305_PM_x_at  | ANP32B  | acidic (leucine-rich) nuclear phosphoprotein 32 family, member B                        | 0.0025 | 1.21  | Normal up vs > 5 Years Off IS Tolerant   |
| 216043_PM_x_at  | ---     | ---                                                                                     | 0.0025 | -1.31 | Normal down vs > 5 Years Off IS Tolerant |
| 1561411_PM_at   | ---     | ---                                                                                     | 0.0025 | -1.82 | Normal down vs > 5 Years Off IS Tolerant |
| 1564431_PM_a_at | LCNL1   | lipocalin-like 1                                                                        | 0.0025 | -1.24 | Normal down vs > 5 Years Off IS Tolerant |
| 242777_PM_at    | ---     | ---                                                                                     | 0.0025 | -2.16 | Normal down vs > 5 Years Off IS Tolerant |
| 204271_PM_s_at  | EDNRB   | endothelin receptor type B                                                              | 0.0025 | -1.40 | Normal down vs > 5 Years Off IS Tolerant |
| 209914_PM_s_at  | NRXN1   | neurexin 1                                                                              | 0.0025 | -2.12 | Normal down vs > 5 Years Off IS Tolerant |
| 239437_PM_at    | ---     | ---                                                                                     | 0.0025 | 1.54  | Normal up vs > 5 Years Off IS Tolerant   |
| 208014_PM_x_at  | ---     | ---                                                                                     | 0.0025 | -1.96 | Normal down vs > 5 Years Off IS Tolerant |

|                 |                               |                                                                                           |        |       |                                          |
|-----------------|-------------------------------|-------------------------------------------------------------------------------------------|--------|-------|------------------------------------------|
| 228008_PM_at    | ---                           | ---                                                                                       | 0.0025 | -1.55 | Normal down vs > 5 Years Off IS Tolerant |
| 205790_PM_at    | SKAP1                         | src kinase associated phosphoprotein 1                                                    | 0.0025 | 1.79  | Normal up vs > 5 Years Off IS Tolerant   |
| 200062_PM_s_at  | RPL30                         | ribosomal protein L30                                                                     | 0.0025 | 1.14  | Normal up vs > 5 Years Off IS Tolerant   |
| 219935_PM_at    | ADAMTS5                       | ADAM metalloproteinase with thrombospondin type 1 motif, 5                                | 0.0025 | -1.55 | Normal down vs > 5 Years Off IS Tolerant |
| 1555372_PM_at   | BCL2L11                       | BCL2-like 11 (apoptosis facilitator)                                                      | 0.0025 | 2.09  | Normal up vs > 5 Years Off IS Tolerant   |
| AFFX-BioB-M_at  | ---                           | ---                                                                                       | 0.0025 | -2.43 | Normal down vs > 5 Years Off IS Tolerant |
| 215077_PM_at    | ---                           | ---                                                                                       | 0.0025 | -1.37 | Normal down vs > 5 Years Off IS Tolerant |
| 1553397_PM_at   | CCDC13                        | coiled-coil domain containing 13                                                          | 0.0025 | -1.60 | Normal down vs > 5 Years Off IS Tolerant |
| 224434_PM_s_at  | WDR83                         | WD repeat domain 83                                                                       | 0.0025 | -1.52 | Normal down vs > 5 Years Off IS Tolerant |
| 1554569_PM_a_at | CELF2                         | CUGBP, Elav-like family member 2                                                          | 0.0025 | 1.70  | Normal up vs > 5 Years Off IS Tolerant   |
| 237248_PM_at    | PDE11A                        | phosphodiesterase 11A                                                                     | 0.0025 | -1.39 | Normal down vs > 5 Years Off IS Tolerant |
| 202436_PM_s_at  | CYP1B1                        | cytochrome P450, family 1, subfamily B, polypeptide 1                                     | 0.0025 | -2.66 | Normal down vs > 5 Years Off IS Tolerant |
| 227393_PM_at    | ANO9                          | anoctamin 9                                                                               | 0.0025 | 1.70  | Normal up vs > 5 Years Off IS Tolerant   |
| 204381_PM_at    | LRP3                          | low density lipoprotein receptor-related protein 3                                        | 0.0025 | -1.44 | Normal down vs > 5 Years Off IS Tolerant |
| 208861_PM_s_at  | ATRX                          | alpha thalassemia/mental retardation syndrome X-linked                                    | 0.0025 | 1.33  | Normal up vs > 5 Years Off IS Tolerant   |
| 204923_PM_at    | SASH3                         | SAM and SH3 domain containing 3                                                           | 0.0025 | -1.27 | Normal down vs > 5 Years Off IS Tolerant |
| 1557837_PM_a_at | ELMOD2                        | ELMO/CED-12 domain containing 2                                                           | 0.0025 | -1.51 | Normal down vs > 5 Years Off IS Tolerant |
| 222021_PM_x_at  | SDHA /// SDHAP1<br>/// SDHAP2 | succinate dehydrogenase complex, subunit A, flavoprotein (Fp) /// succinate dehydrogenase | 0.0025 | 1.23  | Normal up vs > 5 Years Off IS Tolerant   |
| 218328_PM_at    | COQ4                          | coenzyme Q4 homolog ( <i>S. cerevisiae</i> )                                              | 0.0025 | 1.55  | Normal up vs > 5 Years Off IS Tolerant   |
| 239988_PM_at    | ---                           | ---                                                                                       | 0.0025 | 1.65  | Normal up vs > 5 Years Off IS Tolerant   |
| 235554_PM_x_at  | PACRGL                        | PARK2 co-regulated-like                                                                   | 0.0025 | -1.42 | Normal down vs > 5 Years Off IS Tolerant |
| 213122_PM_at    | TSPYL5                        | TSPY-like 5                                                                               | 0.0025 | 1.92  | Normal up vs > 5 Years Off IS Tolerant   |
| 212344_PM_at    | SULF1                         | sulfatase 1                                                                               | 0.0025 | -1.49 | Normal down vs > 5 Years Off IS Tolerant |
| 225947_PM_at    | MYO19                         | myosin XIX                                                                                | 0.0025 | 1.49  | Normal up vs > 5 Years Off IS Tolerant   |

|                |                                                   |                                                                                    |        |       |                                          |
|----------------|---------------------------------------------------|------------------------------------------------------------------------------------|--------|-------|------------------------------------------|
| 244516_PM_at   | ---                                               | ---                                                                                | 0.0025 | -1.34 | Normal down vs > 5 Years Off IS Tolerant |
| 232680_PM_at   | HDGFL1                                            | hepatoma derived growth factor-like 1                                              | 0.0025 | -1.44 | Normal down vs > 5 Years Off IS Tolerant |
| 223217_PM_s_at | NFKBIZ                                            | nuclear factor of kappa light polypeptide gene enhancer in B-cells inhibitor, zeta | 0.0025 | 2.03  | Normal up vs > 5 Years Off IS Tolerant   |
| 205083_PM_at   | AOX1                                              | aldehyde oxidase 1                                                                 | 0.0025 | -1.57 | Normal down vs > 5 Years Off IS Tolerant |
| 215160_PM_x_at | LOC100509419 ///<br>LOC100510581 ///<br>LOC642236 | protein FRG1B-like /// protein FRG1-like /// FSHD region gene 1 pseudogene         | 0.0025 | 1.39  | Normal up vs > 5 Years Off IS Tolerant   |
| 236561_PM_at   | ---                                               | ---                                                                                | 0.0025 | 1.55  | Normal up vs > 5 Years Off IS Tolerant   |
| 233780_PM_at   | RIF1                                              | RAP1 interacting factor homolog (yeast)                                            | 0.0025 | -1.81 | Normal down vs > 5 Years Off IS Tolerant |
| 226454_PM_at   | 9-Mar                                             | membrane-associated ring finger (C3HC4) 9                                          | 0.0025 | 1.59  | Normal up vs > 5 Years Off IS Tolerant   |
| 212096_PM_s_at | MTUS1                                             | microtubule associated tumor suppressor 1                                          | 0.0026 | 2.08  | Normal up vs > 5 Years Off IS Tolerant   |
| 60528_PM_at    | JMJD7-PLA2G4B ///<br>PLA2G4B                      | JMJD7-PLA2G4B readthrough /// phospholipase A2, group IVB (cytosolic)              | 0.0026 | 1.40  | Normal up vs > 5 Years Off IS Tolerant   |
| 1553099_PM_at  | TIGD1                                             | tigger transposable element derived 1                                              | 0.0026 | 2.00  | Normal up vs > 5 Years Off IS Tolerant   |
| 228974_PM_at   | ---                                               | ---                                                                                | 0.0026 | 1.84  | Normal up vs > 5 Years Off IS Tolerant   |
| 219648_PM_at   | MREG                                              | melanoregulin                                                                      | 0.0026 | 1.60  | Normal up vs > 5 Years Off IS Tolerant   |
| 203361_PM_s_at | MYCBP                                             | c-myc binding protein                                                              | 0.0026 | -1.44 | Normal down vs > 5 Years Off IS Tolerant |
| 220853_PM_at   | GTDC1                                             | glycosyltransferase-like domain containing 1                                       | 0.0026 | -1.52 | Normal down vs > 5 Years Off IS Tolerant |
| 220883_PM_at   | ---                                               | ---                                                                                | 0.0026 | -1.62 | Normal down vs > 5 Years Off IS Tolerant |
| 1564402_PM_at  | LOC146795                                         | hypothetical protein LOC146795                                                     | 0.0026 | -1.31 | Normal down vs > 5 Years Off IS Tolerant |
| 231090_PM_s_at | ARID2                                             | AT rich interactive domain 2 (ARID, RFX-like)                                      | 0.0026 | 1.47  | Normal up vs > 5 Years Off IS Tolerant   |
| 233958_PM_at   | ---                                               | ---                                                                                | 0.0026 | -1.48 | Normal down vs > 5 Years Off IS Tolerant |
| 1570152_PM_at  | ---                                               | ---                                                                                | 0.0026 | -1.53 | Normal down vs > 5 Years Off IS Tolerant |
| 212788_PM_x_at | FTL                                               | ferritin, light polypeptide                                                        | 0.0026 | -1.16 | Normal down vs > 5 Years Off IS Tolerant |
| 200024_PM_at   | RPS5                                              | ribosomal protein S5                                                               | 0.0026 | 1.42  | Normal up vs > 5 Years Off IS Tolerant   |
| 201068_PM_s_at | PSMC2                                             | proteasome (prosome, macropain) 26S subunit, ATPase, 2                             | 0.0026 | 1.28  | Normal up vs > 5 Years Off IS Tolerant   |

|                |                     |                                                                                       |        |       |                                          |
|----------------|---------------------|---------------------------------------------------------------------------------------|--------|-------|------------------------------------------|
| 243371_PM_at   | ---                 | ---                                                                                   | 0.0026 | 2.05  | Normal up vs > 5 Years Off IS Tolerant   |
| 241947_PM_at   | LOC100233209        | hypothetical LOC100233209                                                             | 0.0026 | 1.60  | Normal up vs > 5 Years Off IS Tolerant   |
| 216177_PM_at   | ---                 | ---                                                                                   | 0.0026 | 1.46  | Normal up vs > 5 Years Off IS Tolerant   |
| 227338_PM_at   | LOC440983           | Hypothetical gene supported by BC066916                                               | 0.0026 | -1.44 | Normal down vs > 5 Years Off IS Tolerant |
| 1552872_PM_at  | ASMTL-AS            | ASMTL antisense RNA (non-protein coding)                                              | 0.0026 | -1.35 | Normal down vs > 5 Years Off IS Tolerant |
| 1570196_PM_at  | ---                 | ---                                                                                   | 0.0026 | -1.83 | Normal down vs > 5 Years Off IS Tolerant |
| 212851_PM_at   | DCUN1D4             | DCN1, defective in cullin neddylation 1, domain containing 4 ( <i>S. cerevisiae</i> ) | 0.0026 | 1.54  | Normal up vs > 5 Years Off IS Tolerant   |
| 202174_PM_s_at | PCM1                | pericentriolar material 1                                                             | 0.0026 | 1.37  | Normal up vs > 5 Years Off IS Tolerant   |
| 222578_PM_s_at | UBA5                | ubiquitin-like modifier activating enzyme 5                                           | 0.0026 | 1.60  | Normal up vs > 5 Years Off IS Tolerant   |
| 229717_PM_at   | AMIGO3 ///<br>GMPPB | adhesion molecule with Ig-like domain 3 /// GDP-mannose pyrophosphorylase B           | 0.0026 | 1.33  | Normal up vs > 5 Years Off IS Tolerant   |
| 235666_PM_at   | ITGA8               | integrin, alpha 8                                                                     | 0.0026 | -1.26 | Normal down vs > 5 Years Off IS Tolerant |
| 221699_PM_s_at | DDX50               | DEAD (Asp-Glu-Ala-Asp) box polypeptide 50                                             | 0.0026 | 1.30  | Normal up vs > 5 Years Off IS Tolerant   |
| 221986_PM_s_at | KLHL24              | kelch-like 24 ( <i>Drosophila</i> )                                                   | 0.0026 | 2.04  | Normal up vs > 5 Years Off IS Tolerant   |
| 1558783_PM_at  | ---                 | ---                                                                                   | 0.0026 | 2.27  | Normal up vs > 5 Years Off IS Tolerant   |
| 241469_PM_at   | HFM1                | HFM1, ATP-dependent DNA helicase homolog ( <i>S. cerevisiae</i> )                     | 0.0026 | -1.32 | Normal down vs > 5 Years Off IS Tolerant |
| 218211_PM_s_at | MLPH                | melanophilin                                                                          | 0.0026 | -1.48 | Normal down vs > 5 Years Off IS Tolerant |
| 205203_PM_at   | PLD1                | phospholipase D1, phosphatidylcholine-specific                                        | 0.0026 | -1.49 | Normal down vs > 5 Years Off IS Tolerant |
| 206655_PM_s_at | GP1BB /// SEPT5     | glycoprotein Ib (platelet), beta polypeptide /// septin 5                             | 0.0026 | 2.99  | Normal up vs > 5 Years Off IS Tolerant   |
| 242765_PM_at   | MOBP                | myelin-associated oligodendrocyte basic protein                                       | 0.0026 | -1.35 | Normal down vs > 5 Years Off IS Tolerant |
| 237059_PM_at   | ---                 | ---                                                                                   | 0.0026 | -1.44 | Normal down vs > 5 Years Off IS Tolerant |
| 212321_PM_at   | SGPL1               | sphingosine-1-phosphate lyase 1                                                       | 0.0026 | 1.56  | Normal up vs > 5 Years Off IS Tolerant   |
| 204352_PM_at   | TRAF5               | TNF receptor-associated factor 5                                                      | 0.0026 | 1.75  | Normal up vs > 5 Years Off IS Tolerant   |
| 240338_PM_at   | ---                 | ---                                                                                   | 0.0026 | 1.70  | Normal up vs > 5 Years Off IS Tolerant   |
| 226527_PM_at   | RPRD2               | regulation of nuclear pre-mRNA domain containing 2                                    | 0.0026 | 1.68  | Normal up vs > 5 Years Off IS Tolerant   |
| 231402_PM_at   | ---                 | ---                                                                                   | 0.0026 | -1.46 | Normal down vs > 5 Years Off IS Tolerant |

|                |           |                                                                                         |        |       |                                          |
|----------------|-----------|-----------------------------------------------------------------------------------------|--------|-------|------------------------------------------|
| 228131_PM_at   | ERCC1     | excision repair cross-complementing rodent repair deficiency, complementation group 1 ( | 0.0026 | 1.66  | Normal up vs > 5 Years Off IS Tolerant   |
| 1553141_PM_at  | C13orf31  | chromosome 13 open reading frame 31                                                     | 0.0026 | -1.37 | Normal down vs > 5 Years Off IS Tolerant |
| 216387_PM_x_at | ---       | ---                                                                                     | 0.0026 | 1.29  | Normal up vs > 5 Years Off IS Tolerant   |
| 214527_PM_s_at | PQBP1     | polyglutamine binding protein 1                                                         | 0.0026 | 1.66  | Normal up vs > 5 Years Off IS Tolerant   |
| 201753_PM_s_at | ADD3      | adducin 3 (gamma)                                                                       | 0.0026 | 1.40  | Normal up vs > 5 Years Off IS Tolerant   |
| 200741_PM_s_at | RPS27     | ribosomal protein S27                                                                   | 0.0026 | 1.10  | Normal up vs > 5 Years Off IS Tolerant   |
| 224723_PM_x_at | LOC401397 | hypothetical LOC401397                                                                  | 0.0026 | -1.43 | Normal down vs > 5 Years Off IS Tolerant |
| 211887_PM_x_at | MSR1      | macrophage scavenger receptor 1                                                         | 0.0026 | -1.33 | Normal down vs > 5 Years Off IS Tolerant |
| 228825_PM_at   | PTGR1     | prostaglandin reductase 1                                                               | 0.0026 | -1.37 | Normal down vs > 5 Years Off IS Tolerant |
| 228988_PM_at   | ZNF711    | zinc finger protein 711                                                                 | 0.0026 | 1.83  | Normal up vs > 5 Years Off IS Tolerant   |
| 208403_PM_x_at | MAX       | MYC associated factor X                                                                 | 0.0026 | 1.57  | Normal up vs > 5 Years Off IS Tolerant   |
| 224196_PM_x_at | DPH5      | DPH5 homolog ( <i>S. cerevisiae</i> )                                                   | 0.0026 | 1.60  | Normal up vs > 5 Years Off IS Tolerant   |
| 240779_PM_at   | ---       | ---                                                                                     | 0.0026 | -1.46 | Normal down vs > 5 Years Off IS Tolerant |
| 1566956_PM_at  | OR7E104P  | olfactory receptor, family 7, subfamily E, member 104 pseudogene                        | 0.0026 | -1.99 | Normal down vs > 5 Years Off IS Tolerant |
| 209156_PM_s_at | COL6A2    | collagen, type VI, alpha 2                                                              | 0.0027 | -1.30 | Normal down vs > 5 Years Off IS Tolerant |
| 214191_PM_at   | ICA1      | islet cell autoantigen 1, 69kDa                                                         | 0.0027 | -1.32 | Normal down vs > 5 Years Off IS Tolerant |
| 213473_PM_at   | BRAP      | BRCA1 associated protein                                                                | 0.0027 | 1.62  | Normal up vs > 5 Years Off IS Tolerant   |
| 216505_PM_x_at | ---       | ---                                                                                     | 0.0027 | 1.30  | Normal up vs > 5 Years Off IS Tolerant   |
| 213444_PM_at   | ZNF862    | zinc finger protein 862                                                                 | 0.0027 | 1.59  | Normal up vs > 5 Years Off IS Tolerant   |
| 227768_PM_at   | ZNF407    | zinc finger protein 407                                                                 | 0.0027 | 1.38  | Normal up vs > 5 Years Off IS Tolerant   |
| 223139_PM_s_at | DHX36     | DEAH (Asp-Glu-Ala-His) box polypeptide 36                                               | 0.0027 | 1.31  | Normal up vs > 5 Years Off IS Tolerant   |
| 244455_PM_at   | KCNT2     | potassium channel, subfamily T, member 2                                                | 0.0027 | -1.98 | Normal down vs > 5 Years Off IS Tolerant |
| AFFX-BioC-5_at | ---       | ---                                                                                     | 0.0027 | -2.34 | Normal down vs > 5 Years Off IS Tolerant |
| 204286_PM_s_at | PMAIP1    | phorbol-12-myristate-13-acetate-induced protein 1                                       | 0.0027 | 2.01  | Normal up vs > 5 Years Off IS Tolerant   |
| 1559154_PM_at  | ---       | ---                                                                                     | 0.0027 | 1.68  | Normal up vs > 5 Years Off IS Tolerant   |
| 217950_PM_at   | NOSIP     | nitric oxide synthase interacting protein                                               | 0.0027 | 2.16  | Normal up vs > 5 Years Off IS Tolerant   |
| 201578_PM_at   | PODXL     | podocalyxin-like                                                                        | 0.0027 | -1.24 | Normal down vs > 5 Years Off IS Tolerant |

|                |              |                                                          |        |       |                                          |
|----------------|--------------|----------------------------------------------------------|--------|-------|------------------------------------------|
| 225864_PM_at   | FAM84B       | family with sequence similarity 84, member B             | 0.0027 | 2.11  | Normal up vs > 5 Years Off IS Tolerant   |
| 211715_PM_s_at | BDH1         | 3-hydroxybutyrate dehydrogenase, type 1                  | 0.0027 | 1.72  | Normal up vs > 5 Years Off IS Tolerant   |
| 225147_PM_at   | CYTH3        | cytohesin 3                                              | 0.0027 | 1.82  | Normal up vs > 5 Years Off IS Tolerant   |
| 206767_PM_at   | RBMS3        | RNA binding motif, single stranded interacting protein 3 | 0.0027 | -1.48 | Normal down vs > 5 Years Off IS Tolerant |
| 225214_PM_at   | LOC100129034 | hypothetical LOC100129034                                | 0.0027 | -1.47 | Normal down vs > 5 Years Off IS Tolerant |
| 1569520_PM_at  | ---          | ---                                                      | 0.0027 | 1.53  | Normal up vs > 5 Years Off IS Tolerant   |
| 233058_PM_at   | GPSM2        | G-protein signaling modulator 2                          | 0.0027 | -1.31 | Normal down vs > 5 Years Off IS Tolerant |
| 239515_PM_at   | ---          | ---                                                      | 0.0027 | -1.41 | Normal down vs > 5 Years Off IS Tolerant |
| 1563026_PM_at  | ---          | ---                                                      | 0.0027 | -1.34 | Normal down vs > 5 Years Off IS Tolerant |
| 237909_PM_at   | ADAM6        | ADAM metallopeptidase domain 6 (pseudogene)              | 0.0027 | -1.68 | Normal down vs > 5 Years Off IS Tolerant |
| 219822_PM_at   | MTRF1        | mitochondrial translational release factor 1             | 0.0027 | 1.76  | Normal up vs > 5 Years Off IS Tolerant   |
| AFFX-BioB-3_at | ---          | ---                                                      | 0.0027 | -2.43 | Normal down vs > 5 Years Off IS Tolerant |
| 1560169_PM_at  | ---          | ---                                                      | 0.0027 | -1.76 | Normal down vs > 5 Years Off IS Tolerant |
| AFFX-BioB-5_at | ---          | ---                                                      | 0.0027 | -2.25 | Normal down vs > 5 Years Off IS Tolerant |
| 1562399_PM_at  | ---          | ---                                                      | 0.0027 | -1.92 | Normal down vs > 5 Years Off IS Tolerant |
| 227126_PM_at   | PTPRG        | protein tyrosine phosphatase, receptor type, G           | 0.0027 | -2.74 | Normal down vs > 5 Years Off IS Tolerant |
| 1564828_PM_at  | KIAA1211     | KIAA1211                                                 | 0.0027 | -1.31 | Normal down vs > 5 Years Off IS Tolerant |
| 211914_PM_x_at | NF1          | neurofibromin 1                                          | 0.0027 | -1.96 | Normal down vs > 5 Years Off IS Tolerant |
| 1556846_PM_at  | ---          | ---                                                      | 0.0027 | -1.60 | Normal down vs > 5 Years Off IS Tolerant |
| 241312_PM_at   | ---          | ---                                                      | 0.0027 | -1.64 | Normal down vs > 5 Years Off IS Tolerant |
| 1559515_PM_at  | ---          | ---                                                      | 0.0027 | -1.41 | Normal down vs > 5 Years Off IS Tolerant |
| 1560265_PM_at  | GRIK2        | glutamate receptor, ionotropic, kainate 2                | 0.0027 | -1.40 | Normal down vs > 5 Years Off IS Tolerant |

|                 |              |                                                                        |        |       |                                          |
|-----------------|--------------|------------------------------------------------------------------------|--------|-------|------------------------------------------|
| 201565_PM_s_at  | ID2          | inhibitor of DNA binding 2, dominant negative helix-loop-helix protein | 0.0027 | 1.36  | Normal up vs > 5 Years Off IS Tolerant   |
| 238849_PM_at    | ACY1         | Aminoacylase 1                                                         | 0.0027 | -1.29 | Normal down vs > 5 Years Off IS Tolerant |
| 37586_PM_at     | ZNF142       | zinc finger protein 142                                                | 0.0027 | 1.34  | Normal up vs > 5 Years Off IS Tolerant   |
| 1565525_PM_a_at | TCP11L2      | t-complex 11 (mouse)-like 2                                            | 0.0027 | 2.11  | Normal up vs > 5 Years Off IS Tolerant   |
| 227225_PM_at    | ---          | ---                                                                    | 0.0027 | -1.40 | Normal down vs > 5 Years Off IS Tolerant |
| 233887_PM_at    | GPR126       | G protein-coupled receptor 126                                         | 0.0027 | -1.71 | Normal down vs > 5 Years Off IS Tolerant |
| 214043_PM_at    | PTPRD        | protein tyrosine phosphatase, receptor type, D                         | 0.0027 | -2.20 | Normal down vs > 5 Years Off IS Tolerant |
| 220815_PM_at    | CTNNA3       | catenin (cadherin-associated protein), alpha 3                         | 0.0027 | -1.36 | Normal down vs > 5 Years Off IS Tolerant |
| 233816_PM_at    | ---          | ---                                                                    | 0.0027 | -2.26 | Normal down vs > 5 Years Off IS Tolerant |
| 206795_PM_at    | F2RL2        | coagulation factor II (thrombin) receptor-like 2                       | 0.0027 | -1.33 | Normal down vs > 5 Years Off IS Tolerant |
| 1557117_PM_at   | ---          | ---                                                                    | 0.0027 | 1.55  | Normal up vs > 5 Years Off IS Tolerant   |
| 227661_PM_at    | ANKRD11      | Ankyrin repeat domain 11                                               | 0.0027 | -1.34 | Normal down vs > 5 Years Off IS Tolerant |
| 242593_PM_at    | ---          | ---                                                                    | 0.0027 | 1.89  | Normal up vs > 5 Years Off IS Tolerant   |
| 215369_PM_at    | ---          | ---                                                                    | 0.0027 | -1.24 | Normal down vs > 5 Years Off IS Tolerant |
| 1569156_PM_at   | ZNF846       | zinc finger protein 846                                                | 0.0027 | 1.37  | Normal up vs > 5 Years Off IS Tolerant   |
| 233543_PM_s_at  | FAM175A      | family with sequence similarity 175, member A                          | 0.0027 | 2.20  | Normal up vs > 5 Years Off IS Tolerant   |
| 202435_PM_s_at  | CYP1B1       | cytochrome P450, family 1, subfamily B, polypeptide 1                  | 0.0027 | -2.56 | Normal down vs > 5 Years Off IS Tolerant |
| 213754_PM_s_at  | PAIP1        | poly(A) binding protein interacting protein 1                          | 0.0027 | 1.83  | Normal up vs > 5 Years Off IS Tolerant   |
| 202597_PM_at    | IRF6         | interferon regulatory factor 6                                         | 0.0027 | -1.72 | Normal down vs > 5 Years Off IS Tolerant |
| 215884_PM_s_at  | UBQLN2       | ubiquilin 2                                                            | 0.0027 | 1.46  | Normal up vs > 5 Years Off IS Tolerant   |
| 229463_PM_at    | NTRK2        | neurotrophic tyrosine kinase, receptor, type 2                         | 0.0027 | -1.69 | Normal down vs > 5 Years Off IS Tolerant |
| 1561421_PM_a_at | ---          | ---                                                                    | 0.0027 | -1.26 | Normal down vs > 5 Years Off IS Tolerant |
| 1553460_PM_at   | C2orf61      | chromosome 2 open reading frame 61                                     | 0.0027 | -1.36 | Normal down vs > 5 Years Off IS Tolerant |
| 227092_PM_at    | LOC100507448 | hypothetical LOC100507448                                              | 0.0027 | 1.78  | Normal up vs > 5 Years Off IS Tolerant   |

|                 |               |                                                                                                  |        |       |                                          |
|-----------------|---------------|--------------------------------------------------------------------------------------------------|--------|-------|------------------------------------------|
| 223811_PM_s_at  | GET4 /// SUN1 | golgi to ER traffic protein 4 homolog ( <i>S. cerevisiae</i> ) /// Sad1 and UNC84 domain contain | 0.0028 | 1.67  | Normal up vs > 5 Years Off IS Tolerant   |
| 222295_PM_x_at  | ---           | ---                                                                                              | 0.0028 | -1.47 | Normal down vs > 5 Years Off IS Tolerant |
| 1557080_PM_s_at | ITGBL1        | integrin, beta-like 1 (with EGF-like repeat domains)                                             | 0.0028 | -2.26 | Normal down vs > 5 Years Off IS Tolerant |
| 1569900_PM_at   | FLJ16124      | FLJ16124 protein                                                                                 | 0.0028 | -1.39 | Normal down vs > 5 Years Off IS Tolerant |
| 213204_PM_at    | CUL9          | cullin 9                                                                                         | 0.0028 | 1.60  | Normal up vs > 5 Years Off IS Tolerant   |
| 226148_PM_at    | ZBTB44        | zinc finger and BTB domain containing 44                                                         | 0.0028 | 1.46  | Normal up vs > 5 Years Off IS Tolerant   |
| 224663_PM_s_at  | CFL2          | cofilin 2 (muscle)                                                                               | 0.0028 | 1.98  | Normal up vs > 5 Years Off IS Tolerant   |
| 212957_PM_s_at  | LOC92249      | hypothetical LOC92249                                                                            | 0.0028 | 1.50  | Normal up vs > 5 Years Off IS Tolerant   |
| 1568900_PM_a_at | ZNF568        | zinc finger protein 568                                                                          | 0.0028 | 1.51  | Normal up vs > 5 Years Off IS Tolerant   |
| 206591_PM_at    | RAG1          | recombination activating gene 1                                                                  | 0.0028 | -1.56 | Normal down vs > 5 Years Off IS Tolerant |
| 220378_PM_at    | TCP11         | t-complex 11 homolog (mouse)                                                                     | 0.0028 | -1.23 | Normal down vs > 5 Years Off IS Tolerant |
| 1563581_PM_at   | LOC285456     | hypothetical LOC285456                                                                           | 0.0028 | -1.34 | Normal down vs > 5 Years Off IS Tolerant |
| 227044_PM_at    | ---           | ---                                                                                              | 0.0028 | 2.98  | Normal up vs > 5 Years Off IS Tolerant   |
| 243431_PM_at    | ---           | ---                                                                                              | 0.0028 | -2.07 | Normal down vs > 5 Years Off IS Tolerant |
| 209154_PM_at    | TAX1BP3       | Tax1 (human T-cell leukemia virus type I) binding protein 3                                      | 0.0028 | 1.50  | Normal up vs > 5 Years Off IS Tolerant   |
| 201542_PM_at    | SAR1A         | SAR1 homolog A ( <i>S. cerevisiae</i> )                                                          | 0.0028 | 1.31  | Normal up vs > 5 Years Off IS Tolerant   |
| 220768_PM_s_at  | CSNK1G3       | casein kinase 1, gamma 3                                                                         | 0.0028 | 1.64  | Normal up vs > 5 Years Off IS Tolerant   |
| 243865_PM_x_at  | ---           | ---                                                                                              | 0.0028 | -1.75 | Normal down vs > 5 Years Off IS Tolerant |
| 203112_PM_s_at  | WHSC2         | Wolf-Hirschhorn syndrome candidate 2                                                             | 0.0028 | 1.50  | Normal up vs > 5 Years Off IS Tolerant   |
| 213813_PM_x_at  | ---           | ---                                                                                              | 0.0028 | -2.11 | Normal down vs > 5 Years Off IS Tolerant |
| 1570639_PM_at   | ---           | ---                                                                                              | 0.0028 | -1.87 | Normal down vs > 5 Years Off IS Tolerant |
| 226606_PM_s_at  | GTPBP5        | GTP binding protein 5 (putative)                                                                 | 0.0028 | 1.88  | Normal up vs > 5 Years Off IS Tolerant   |
| 209917_PM_s_at  | TP53TG1       | TP53 target 1 (non-protein coding)                                                               | 0.0028 | 1.76  | Normal up vs > 5 Years Off IS Tolerant   |
| 215177_PM_s_at  | ITGA6         | integrin, alpha 6                                                                                | 0.0028 | 2.70  | Normal up vs > 5 Years Off IS Tolerant   |
| 201402_PM_at    | ADRBK1        | adrenergic, beta, receptor kinase 1                                                              | 0.0028 | -1.49 | Normal down vs > 5 Years Off IS Tolerant |
| 1569594_PM_a_at | SDCCAG1       | serologically defined colon cancer antigen 1                                                     | 0.0028 | 1.35  | Normal up vs > 5 Years Off IS Tolerant   |



|                      |              |                                                                                     |        |       |                                          |
|----------------------|--------------|-------------------------------------------------------------------------------------|--------|-------|------------------------------------------|
| 232745_PM_x_at       | SPEF2        | sperm flagellar 2                                                                   | 0.0028 | 1.27  | Normal up vs > 5 Years Off IS Tolerant   |
| 228793_PM_at         | JMJD1C       | jumonji domain containing 1C                                                        | 0.0028 | 1.72  | Normal up vs > 5 Years Off IS Tolerant   |
| 1554571_PM_at        | APBB1IP      | amyloid beta (A4) precursor protein-binding, family B, member 1 interacting protein | 0.0028 | 1.80  | Normal up vs > 5 Years Off IS Tolerant   |
| 211478_PM_s_at       | DPP4         | dipeptidyl-peptidase 4                                                              | 0.0028 | 2.35  | Normal up vs > 5 Years Off IS Tolerant   |
| 219778_PM_at         | ZFPM2        | zinc finger protein, multitype 2                                                    | 0.0028 | -1.24 | Normal down vs > 5 Years Off IS Tolerant |
| 240917_PM_at         | LOC100506430 | hypothetical LOC100506430                                                           | 0.0028 | -1.28 | Normal down vs > 5 Years Off IS Tolerant |
| 1554251_PM_at        | HP1BP3       | heterochromatin protein 1, binding protein 3                                        | 0.0028 | 1.62  | Normal up vs > 5 Years Off IS Tolerant   |
| 226115_PM_at         | AHCTF1       | AT hook containing transcription factor 1                                           | 0.0028 | 1.56  | Normal up vs > 5 Years Off IS Tolerant   |
| 215746_PM_at         | ---          | ---                                                                                 | 0.0028 | -1.34 | Normal down vs > 5 Years Off IS Tolerant |
| 219742_PM_at         | PRR7         | proline rich 7 (synaptic)                                                           | 0.0028 | 1.60  | Normal up vs > 5 Years Off IS Tolerant   |
| 1557726_PM_at        | ARMCX4       | armadillo repeat containing, X-linked 4                                             | 0.0028 | -1.36 | Normal down vs > 5 Years Off IS Tolerant |
| 238579_PM_at         | C9orf85      | chromosome 9 open reading frame 85                                                  | 0.0028 | -1.46 | Normal down vs > 5 Years Off IS Tolerant |
| 227226_PM_at         | MRAP2        | melanocortin 2 receptor accessory protein 2                                         | 0.0028 | -1.25 | Normal down vs > 5 Years Off IS Tolerant |
| 226095_PM_s_at       | ATXN1L       | ataxin 1-like                                                                       | 0.0028 | 1.48  | Normal up vs > 5 Years Off IS Tolerant   |
| AFFX-r2-Ec-bioC-3_at | ---          | ---                                                                                 | 0.0028 | -2.20 | Normal down vs > 5 Years Off IS Tolerant |
| 203782_PM_s_at       | POLRMT       | polymerase (RNA) mitochondrial (DNA directed)                                       | 0.0028 | 1.64  | Normal up vs > 5 Years Off IS Tolerant   |
| 211081_PM_s_at       | MAP4K5       | mitogen-activated protein kinase kinase kinase kinase 5                             | 0.0028 | 1.76  | Normal up vs > 5 Years Off IS Tolerant   |
| 201606_PM_s_at       | PWP1         | PWP1 homolog ( <i>S. cerevisiae</i> )                                               | 0.0028 | 1.38  | Normal up vs > 5 Years Off IS Tolerant   |
| 226341_PM_at         | ---          | ---                                                                                 | 0.0028 | 1.59  | Normal up vs > 5 Years Off IS Tolerant   |
| 212921_PM_at         | SMYD2        | SET and MYND domain containing 2                                                    | 0.0028 | 1.61  | Normal up vs > 5 Years Off IS Tolerant   |
| 202404_PM_s_at       | COL1A2       | collagen, type I, alpha 2                                                           | 0.0028 | -1.31 | Normal down vs > 5 Years Off IS Tolerant |
| 222700_PM_at         | ATL2         | atlastin GTPase 2                                                                   | 0.0028 | 1.72  | Normal up vs > 5 Years Off IS Tolerant   |
| 210874_PM_s_at       | NAT6         | N-acetyltransferase 6 (GCN5-related)                                                | 0.0028 | 1.47  | Normal up vs > 5 Years Off IS Tolerant   |
| 214731_PM_at         | ---          | ---                                                                                 | 0.0028 | 2.13  | Normal up vs > 5 Years Off IS Tolerant   |
| 233550_PM_s_at       | SLC4A11      | solute carrier family 4, sodium borate transporter, member 11                       | 0.0028 | -1.34 | Normal down vs > 5 Years Off IS Tolerant |
| 221417_PM_x_at       | S1PR5        | sphingosine-1-phosphate receptor 5                                                  | 0.0028 | 1.75  | Normal up vs > 5 Years Off IS Tolerant   |
| 208722_PM_s_at       | ANAPC5       | anaphase promoting complex subunit 5                                                | 0.0029 | 1.35  | Normal up vs > 5 Years Off IS Tolerant   |

|                      |              |                                                                                        |        |       |                                          |
|----------------------|--------------|----------------------------------------------------------------------------------------|--------|-------|------------------------------------------|
| 1565844_PM_at        | BRPF3        | Bromodomain and PHD finger containing, 3                                               | 0.0029 | -1.27 | Normal down vs > 5 Years Off IS Tolerant |
| 232304_PM_at         | PELI1        | Pellino homolog 1 (Drosophila)                                                         | 0.0029 | 1.99  | Normal up vs > 5 Years Off IS Tolerant   |
| 1563295_PM_at        | ---          | ---                                                                                    | 0.0029 | -1.55 | Normal down vs > 5 Years Off IS Tolerant |
| 1552540_PM_s_at      | IQCD         | IQ motif containing D                                                                  | 0.0029 | -1.35 | Normal down vs > 5 Years Off IS Tolerant |
| 243647_PM_at         | ---          | ---                                                                                    | 0.0029 | -1.28 | Normal down vs > 5 Years Off IS Tolerant |
| 231098_PM_at         | ---          | ---                                                                                    | 0.0029 | -1.51 | Normal down vs > 5 Years Off IS Tolerant |
| 208632_PM_at         | RNF10        | ring finger protein 10                                                                 | 0.0029 | 1.72  | Normal up vs > 5 Years Off IS Tolerant   |
| 243134_PM_at         | ---          | ---                                                                                    | 0.0029 | 2.16  | Normal up vs > 5 Years Off IS Tolerant   |
| 232464_PM_at         | TRIM78P      | tripartite motif-containing 78, pseudogene                                             | 0.0029 | -1.37 | Normal down vs > 5 Years Off IS Tolerant |
| 1555754_PM_s_at      | ATN1         | atrophin 1                                                                             | 0.0029 | -1.29 | Normal down vs > 5 Years Off IS Tolerant |
| 1563137_PM_at        | MGAT5B       | mannosyl (alpha-1,6-)-glycoprotein beta-1,6-N-acetylglucosaminyltransferase, isozyme B | 0.0029 | -1.33 | Normal down vs > 5 Years Off IS Tolerant |
| 240598_PM_at         | ---          | ---                                                                                    | 0.0029 | -1.43 | Normal down vs > 5 Years Off IS Tolerant |
| 244046_PM_at         | URGCP        | upregulator of cell proliferation                                                      | 0.0029 | 1.74  | Normal up vs > 5 Years Off IS Tolerant   |
| 241977_PM_s_at       | RAB3C        | RAB3C, member RAS oncogene family                                                      | 0.0029 | -1.87 | Normal down vs > 5 Years Off IS Tolerant |
| AFFX-r2-Ec-bioC-5_at | ---          | ---                                                                                    | 0.0029 | -2.33 | Normal down vs > 5 Years Off IS Tolerant |
| 234611_PM_at         | LOC100287902 | hypothetical LOC100287902                                                              | 0.0029 | -1.37 | Normal down vs > 5 Years Off IS Tolerant |
| 202618_PM_s_at       | MECP2        | methyl CpG binding protein 2 (Rett syndrome)                                           | 0.0029 | 1.33  | Normal up vs > 5 Years Off IS Tolerant   |
| 213792_PM_s_at       | INSR         | insulin receptor                                                                       | 0.0029 | -1.60 | Normal down vs > 5 Years Off IS Tolerant |
| 239119_PM_at         | ---          | ---                                                                                    | 0.0029 | -1.27 | Normal down vs > 5 Years Off IS Tolerant |
| 237970_PM_at         | ---          | ---                                                                                    | 0.0029 | -2.22 | Normal down vs > 5 Years Off IS Tolerant |
| 204688_PM_at         | SGCE         | sarcoglycan, epsilon                                                                   | 0.0029 | 1.47  | Normal up vs > 5 Years Off IS Tolerant   |
| 240306_PM_at         | ---          | ---                                                                                    | 0.0029 | -1.40 | Normal down vs > 5 Years Off IS Tolerant |

|                |              |                                                                            |        |       |                                          |
|----------------|--------------|----------------------------------------------------------------------------|--------|-------|------------------------------------------|
| 1563131_PM_at  | ---          | ---                                                                        | 0.0029 | -1.37 | Normal down vs > 5 Years Off IS Tolerant |
| 232031_PM_s_at | KIAA1632     | KIAA1632                                                                   | 0.0029 | 1.62  | Normal up vs > 5 Years Off IS Tolerant   |
| 227755_PM_at   | ---          | ---                                                                        | 0.0029 | 1.54  | Normal up vs > 5 Years Off IS Tolerant   |
| 212287_PM_at   | SUZ12        | suppressor of zeste 12 homolog (Drosophila)                                | 0.0029 | 1.27  | Normal up vs > 5 Years Off IS Tolerant   |
| 206334_PM_at   | LIPF         | lipase, gastric                                                            | 0.0029 | -1.44 | Normal down vs > 5 Years Off IS Tolerant |
| 220335_PM_x_at | CES3         | carboxylesterase 3                                                         | 0.0029 | -2.13 | Normal down vs > 5 Years Off IS Tolerant |
| 232834_PM_at   | ---          | ---                                                                        | 0.0029 | 2.04  | Normal up vs > 5 Years Off IS Tolerant   |
| 1559336_PM_at  | ---          | ---                                                                        | 0.0029 | -2.34 | Normal down vs > 5 Years Off IS Tolerant |
| 224366_PM_s_at | REPS1        | RALBP1 associated Eps domain containing 1                                  | 0.0029 | 1.30  | Normal up vs > 5 Years Off IS Tolerant   |
| 230885_PM_at   | SPG7         | spastic paraplegia 7 (pure and complicated autosomal recessive)            | 0.0029 | 1.52  | Normal up vs > 5 Years Off IS Tolerant   |
| 1560757_PM_at  | TOP1MT       | Topoisomerase (DNA) I, mitochondrial                                       | 0.0029 | -1.26 | Normal down vs > 5 Years Off IS Tolerant |
| 206069_PM_s_at | ACADL        | acyl-CoA dehydrogenase, long chain                                         | 0.0029 | -1.35 | Normal down vs > 5 Years Off IS Tolerant |
| 232652_PM_x_at | SCAND1       | SCAN domain containing 1                                                   | 0.0029 | 1.60  | Normal up vs > 5 Years Off IS Tolerant   |
| 204538_PM_x_at | NPIP         | nuclear pore complex interacting protein                                   | 0.0029 | 1.30  | Normal up vs > 5 Years Off IS Tolerant   |
| 244530_PM_at   | ---          | ---                                                                        | 0.0029 | -1.29 | Normal down vs > 5 Years Off IS Tolerant |
| 240957_PM_at   | ---          | ---                                                                        | 0.0029 | 1.64  | Normal up vs > 5 Years Off IS Tolerant   |
| 236485_PM_at   | LOC100507111 | hypothetical LOC100507111                                                  | 0.0029 | 1.49  | Normal up vs > 5 Years Off IS Tolerant   |
| 202984_PM_s_at | BAG5         | BCL2-associated athanogene 5                                               | 0.0029 | 1.39  | Normal up vs > 5 Years Off IS Tolerant   |
| 217962_PM_at   | NOP10        | NOP10 ribonucleoprotein homolog (yeast)                                    | 0.0029 | -1.52 | Normal down vs > 5 Years Off IS Tolerant |
| 222958_PM_s_at | DEPDC1       | DEP domain containing 1                                                    | 0.0029 | -1.51 | Normal down vs > 5 Years Off IS Tolerant |
| 209764_PM_at   | MGAT3        | mannosyl (beta-1,4-)-glycoprotein beta-1,4-N-acetylglucosaminyltransferase | 0.0029 | -1.42 | Normal down vs > 5 Years Off IS Tolerant |
| 215032_PM_at   | RREB1        | ras responsive element binding protein 1                                   | 0.0029 | 1.61  | Normal up vs > 5 Years Off IS Tolerant   |
| 1560198_PM_at  | C14orf70     | chromosome 14 open reading frame 70                                        | 0.0029 | -1.40 | Normal down vs > 5 Years Off IS Tolerant |
| 228366_PM_at   | ---          | ---                                                                        | 0.0029 | 1.62  | Normal up vs > 5 Years Off IS Tolerant   |
| 1569464_PM_at  | PPFIBP1      | PTPRF interacting protein, binding protein 1 (liprin beta 1)               | 0.0029 | -1.40 | Normal down vs > 5 Years Off IS Tolerant |

|                |                                                             |                                                                                            |        |       |                                          |
|----------------|-------------------------------------------------------------|--------------------------------------------------------------------------------------------|--------|-------|------------------------------------------|
| 209616_PM_s_at | CES1                                                        | carboxylesterase 1                                                                         | 0.0029 | -3.82 | Normal down vs > 5 Years Off IS Tolerant |
| 226385_PM_s_at | C7orf30                                                     | chromosome 7 open reading frame 30                                                         | 0.0029 | 1.37  | Normal up vs > 5 Years Off IS Tolerant   |
| 1553019_PM_at  | TMC2                                                        | transmembrane channel-like 2                                                               | 0.0030 | -1.35 | Normal down vs > 5 Years Off IS Tolerant |
| 229012_PM_at   | C9orf24                                                     | chromosome 9 open reading frame 24                                                         | 0.0030 | 1.23  | Normal up vs > 5 Years Off IS Tolerant   |
| 209544_PM_at   | RIPK2                                                       | receptor-interacting serine-threonine kinase 2                                             | 0.0030 | 2.32  | Normal up vs > 5 Years Off IS Tolerant   |
| 229922_PM_at   | GPRIN1                                                      | G protein regulated inducer of neurite outgrowth 1                                         | 0.0030 | -1.28 | Normal down vs > 5 Years Off IS Tolerant |
| 218935_PM_at   | EHD3                                                        | EH-domain containing 3                                                                     | 0.0030 | 1.74  | Normal up vs > 5 Years Off IS Tolerant   |
| 212778_PM_at   | PACS2                                                       | phosphofurin acidic cluster sorting protein 2                                              | 0.0030 | 1.88  | Normal up vs > 5 Years Off IS Tolerant   |
| 243632_PM_at   | ---                                                         | ---                                                                                        | 0.0030 | -1.35 | Normal down vs > 5 Years Off IS Tolerant |
| 218660_PM_at   | DYSF                                                        | dysferlin, limb girdle muscular dystrophy 2B (autosomal recessive)                         | 0.0030 | -1.95 | Normal down vs > 5 Years Off IS Tolerant |
| 41512_PM_at    | BRAP                                                        | BRCA1 associated protein                                                                   | 0.0030 | 1.59  | Normal up vs > 5 Years Off IS Tolerant   |
| 239220_PM_at   | ---                                                         | ---                                                                                        | 0.0030 | -1.35 | Normal down vs > 5 Years Off IS Tolerant |
| 221745_PM_at   | DCAF7                                                       | DDB1 and CUL4 associated factor 7                                                          | 0.0030 | -1.93 | Normal down vs > 5 Years Off IS Tolerant |
| 235652_PM_at   | ---                                                         | ---                                                                                        | 0.0030 | 2.17  | Normal up vs > 5 Years Off IS Tolerant   |
| 222965_PM_at   | PRO2214                                                     | hypothetical protein PRO2214                                                               | 0.0030 | -1.64 | Normal down vs > 5 Years Off IS Tolerant |
| 237338_PM_at   | B3GNT8                                                      | UDP-GlcNAc:betaGal beta-1,3-N-acetylglucosaminyltransferase 8                              | 0.0030 | -1.38 | Normal down vs > 5 Years Off IS Tolerant |
| 209628_PM_at   | NXT2                                                        | nuclear transport factor 2-like export factor 2                                            | 0.0030 | 1.53  | Normal up vs > 5 Years Off IS Tolerant   |
| 220602_PM_s_at | LOC388152 ///<br>LOC727751 ///<br>LOC727849 ///<br>LOC80154 | hypothetical LOC388152 /// hypothetical LOC727751 ///<br>golgin A2 pseudogene /// hypothet | 0.0030 | 1.48  | Normal up vs > 5 Years Off IS Tolerant   |
| 244811_PM_at   | PHIP                                                        | pleckstrin homology domain interacting protein                                             | 0.0030 | 2.32  | Normal up vs > 5 Years Off IS Tolerant   |
| 236316_PM_at   | FAM3C                                                       | family with sequence similarity 3, member C                                                | 0.0030 | 2.21  | Normal up vs > 5 Years Off IS Tolerant   |
| 1563190_PM_at  | ---                                                         | ---                                                                                        | 0.0030 | -1.80 | Normal down vs > 5 Years Off IS Tolerant |
| 209861_PM_s_at | METAP2                                                      | methionyl aminopeptidase 2                                                                 | 0.0030 | 1.45  | Normal up vs > 5 Years Off IS Tolerant   |
| 214834_PM_at   | PAR5                                                        | Prader-Willi/Angelman syndrome-5                                                           | 0.0030 | 1.38  | Normal up vs > 5 Years Off IS Tolerant   |
| 210717_PM_at   | ---                                                         | ---                                                                                        | 0.0030 | 1.55  | Normal up vs > 5 Years Off IS Tolerant   |
| 227575_PM_s_at | C14orf102                                                   | chromosome 14 open reading frame 102                                                       | 0.0030 | 1.70  | Normal up vs > 5 Years Off IS Tolerant   |

|                 |                       |                                                                                           |        |       |                                          |
|-----------------|-----------------------|-------------------------------------------------------------------------------------------|--------|-------|------------------------------------------|
| 237979_PM_at    | ---                   | ---                                                                                       | 0.0030 | -1.43 | Normal down vs > 5 Years Off IS Tolerant |
| 211026_PM_s_at  | MGLL                  | monoglyceride lipase                                                                      | 0.0030 | 2.54  | Normal up vs > 5 Years Off IS Tolerant   |
| 205069_PM_s_at  | ARHGAP26              | Rho GTPase activating protein 26                                                          | 0.0030 | -1.55 | Normal down vs > 5 Years Off IS Tolerant |
| 243192_PM_at    | ---                   | ---                                                                                       | 0.0030 | -2.47 | Normal down vs > 5 Years Off IS Tolerant |
| 222709_PM_at    | ATG7                  | ATG7 autophagy related 7 homolog ( <i>S. cerevisiae</i> )                                 | 0.0030 | -1.84 | Normal down vs > 5 Years Off IS Tolerant |
| 211422_PM_at    | TRPM3                 | transient receptor potential cation channel, subfamily M, member 3                        | 0.0030 | -1.40 | Normal down vs > 5 Years Off IS Tolerant |
| 222107_PM_x_at  | LZTS1                 | leucine zipper, putative tumor suppressor 1                                               | 0.0030 | -1.39 | Normal down vs > 5 Years Off IS Tolerant |
| 237388_PM_at    | ---                   | ---                                                                                       | 0.0030 | 1.77  | Normal up vs > 5 Years Off IS Tolerant   |
| 226027_PM_at    | C9orf119              | chromosome 9 open reading frame 119                                                       | 0.0030 | 1.73  | Normal up vs > 5 Years Off IS Tolerant   |
| 1569491_PM_at   | ---                   | ---                                                                                       | 0.0030 | -1.34 | Normal down vs > 5 Years Off IS Tolerant |
| 227537_PM_s_at  | SP3                   | Sp3 transcription factor                                                                  | 0.0030 | -1.28 | Normal down vs > 5 Years Off IS Tolerant |
| 202594_PM_at    | LEPROTL1              | leptin receptor overlapping transcript-like 1                                             | 0.0030 | 1.87  | Normal up vs > 5 Years Off IS Tolerant   |
| 240468_PM_at    | ---                   | ---                                                                                       | 0.0030 | -1.66 | Normal down vs > 5 Years Off IS Tolerant |
| 225824_PM_at    | CCNK                  | cyclin K                                                                                  | 0.0030 | 1.24  | Normal up vs > 5 Years Off IS Tolerant   |
| 200718_PM_s_at  | SKP1                  | S-phase kinase-associated protein 1                                                       | 0.0030 | 1.23  | Normal up vs > 5 Years Off IS Tolerant   |
| 218997_PM_at    | POLR1E                | polymerase (RNA) I polypeptide E, 53kDa                                                   | 0.0030 | 1.48  | Normal up vs > 5 Years Off IS Tolerant   |
| 233261_PM_at    | EBF1                  | Early B-cell factor 1                                                                     | 0.0030 | 2.37  | Normal up vs > 5 Years Off IS Tolerant   |
| 241898_PM_at    | LIPH                  | lipase, member H                                                                          | 0.0030 | -1.37 | Normal down vs > 5 Years Off IS Tolerant |
| 1567014_PM_s_at | CSNK2A1 ///<br>NFE2L2 | casein kinase 2, alpha 1 polypeptide /// nuclear factor (erythroid-derived 2)-like 2      | 0.0030 | 1.66  | Normal up vs > 5 Years Off IS Tolerant   |
| 236490_PM_at    | NEDD4L                | Neural precursor cell expressed, developmentally down-regulated 4-like                    | 0.0030 | -1.28 | Normal down vs > 5 Years Off IS Tolerant |
| 231441_PM_at    | C7orf62               | chromosome 7 open reading frame 62                                                        | 0.0030 | -2.25 | Normal down vs > 5 Years Off IS Tolerant |
| 204809_PM_at    | CLPX                  | ClpX caseinolytic peptidase X homolog ( <i>E. coli</i> )                                  | 0.0030 | 1.79  | Normal up vs > 5 Years Off IS Tolerant   |
| 212426_PM_s_at  | YWHAQ                 | tyrosine 3-monooxygenase/tryptophan 5-monooxygenase activation protein, theta polypeptide | 0.0030 | 1.30  | Normal up vs > 5 Years Off IS Tolerant   |
| 1560047_PM_s_at | ---                   | ---                                                                                       | 0.0030 | -1.68 | Normal down vs > 5 Years Off IS Tolerant |

|                 |              |                                                                                     |        |       |                                          |
|-----------------|--------------|-------------------------------------------------------------------------------------|--------|-------|------------------------------------------|
| 208740_PM_at    | SAP18        | Sin3A-associated protein, 18kDa                                                     | 0.0030 | 1.56  | Normal up vs > 5 Years Off IS Tolerant   |
| 243757_PM_at    | ---          | ---                                                                                 | 0.0030 | 1.87  | Normal up vs > 5 Years Off IS Tolerant   |
| 231082_PM_at    | ---          | ---                                                                                 | 0.0030 | -1.26 | Normal down vs > 5 Years Off IS Tolerant |
| 224718_PM_at    | YY1          | YY1 transcription factor                                                            | 0.0030 | 1.26  | Normal up vs > 5 Years Off IS Tolerant   |
| 230651_PM_at    | ---          | ---                                                                                 | 0.0031 | 1.73  | Normal up vs > 5 Years Off IS Tolerant   |
| 1556789_PM_a_at | ---          | ---                                                                                 | 0.0031 | -1.35 | Normal down vs > 5 Years Off IS Tolerant |
| 1568675_PM_at   | CHRNA10      | Cholinergic receptor, nicotinic, alpha 10                                           | 0.0031 | -1.31 | Normal down vs > 5 Years Off IS Tolerant |
| 207141_PM_s_at  | KCNJ3        | potassium inwardly-rectifying channel, subfamily J, member 3                        | 0.0031 | -1.51 | Normal down vs > 5 Years Off IS Tolerant |
| 205323_PM_s_at  | MTF1         | metal-regulatory transcription factor 1                                             | 0.0031 | -1.40 | Normal down vs > 5 Years Off IS Tolerant |
| 230925_PM_at    | APBB1IP      | amyloid beta (A4) precursor protein-binding, family B, member 1 interacting protein | 0.0031 | -1.52 | Normal down vs > 5 Years Off IS Tolerant |
| 221706_PM_s_at  | USE1         | unconventional SNARE in the ER 1 homolog (S. cerevisiae)                            | 0.0031 | 1.67  | Normal up vs > 5 Years Off IS Tolerant   |
| 215448_PM_at    | ---          | ---                                                                                 | 0.0031 | -1.84 | Normal down vs > 5 Years Off IS Tolerant |
| 223339_PM_at    | ATPIF1       | ATPase inhibitory factor 1                                                          | 0.0031 | 1.81  | Normal up vs > 5 Years Off IS Tolerant   |
| 1558759_PM_s_at | CLASP2       | cytoplasmic linker associated protein 2                                             | 0.0031 | 1.92  | Normal up vs > 5 Years Off IS Tolerant   |
| 200819_PM_s_at  | RPS15        | ribosomal protein S15                                                               | 0.0031 | 1.25  | Normal up vs > 5 Years Off IS Tolerant   |
| 227178_PM_at    | CELF2        | CUGBP, Elav-like family member 2                                                    | 0.0031 | 1.39  | Normal up vs > 5 Years Off IS Tolerant   |
| 243496_PM_at    | RAB18        | RAB18, member RAS oncogene family                                                   | 0.0031 | 1.61  | Normal up vs > 5 Years Off IS Tolerant   |
| 239586_PM_at    | FAM83A       | family with sequence similarity 83, member A                                        | 0.0031 | -1.38 | Normal down vs > 5 Years Off IS Tolerant |
| 1558944_PM_at   | LOC100508567 | hypothetical LOC100508567                                                           | 0.0031 | -1.26 | Normal down vs > 5 Years Off IS Tolerant |
| 208792_PM_s_at  | CLU          | clusterin                                                                           | 0.0031 | 3.09  | Normal up vs > 5 Years Off IS Tolerant   |
| 228197_PM_at    | C1orf86      | Chromosome 1 open reading frame 86                                                  | 0.0031 | -1.41 | Normal down vs > 5 Years Off IS Tolerant |
| 1558094_PM_s_at | C3orf19      | chromosome 3 open reading frame 19                                                  | 0.0031 | 1.59  | Normal up vs > 5 Years Off IS Tolerant   |
| 231091_PM_x_at  | ---          | ---                                                                                 | 0.0031 | -1.34 | Normal down vs > 5 Years Off IS Tolerant |
| 202776_PM_at    | DNTTIP2      | deoxynucleotidyltransferase, terminal, interacting protein 2                        | 0.0031 | 1.67  | Normal up vs > 5 Years Off IS Tolerant   |
| 1569387_PM_at   | CSGALNACT1   | Chondroitin sulfate N-acetylgalactosaminyltransferase 1                             | 0.0031 | 1.68  | Normal up vs > 5 Years Off IS Tolerant   |

|                |                 |                                                                                         |        |       |                                          |
|----------------|-----------------|-----------------------------------------------------------------------------------------|--------|-------|------------------------------------------|
| 204645_PM_at   | CCNT2           | cyclin T2                                                                               | 0.0031 | 1.99  | Normal up vs > 5 Years Off IS Tolerant   |
| 225709_PM_at   | ARL6IP6         | ADP-ribosylation-like factor 6 interacting protein 6                                    | 0.0031 | -1.31 | Normal down vs > 5 Years Off IS Tolerant |
| 221653_PM_x_at | APOL2           | apolipoprotein L, 2                                                                     | 0.0031 | -1.40 | Normal down vs > 5 Years Off IS Tolerant |
| 230668_PM_at   | NKAIN4          | Na+/K+ transporting ATPase interacting 4                                                | 0.0031 | -1.34 | Normal down vs > 5 Years Off IS Tolerant |
| 200702_PM_s_at | DDX24           | DEAD (Asp-Glu-Ala-Asp) box polypeptide 24                                               | 0.0031 | 1.40  | Normal up vs > 5 Years Off IS Tolerant   |
| 1567611_PM_at  | ---             | ---                                                                                     | 0.0031 | -1.62 | Normal down vs > 5 Years Off IS Tolerant |
| 217027_PM_x_at | KPNB1           | karyopherin (importin) beta 1                                                           | 0.0031 | 1.41  | Normal up vs > 5 Years Off IS Tolerant   |
| 209314_PM_s_at | HBS1L           | HBS1-like ( <i>S. cerevisiae</i> )                                                      | 0.0031 | 1.69  | Normal up vs > 5 Years Off IS Tolerant   |
| 209680_PM_s_at | KIFC1           | kinesin family member C1                                                                | 0.0031 | -1.39 | Normal down vs > 5 Years Off IS Tolerant |
| 233756_PM_at   | ---             | ---                                                                                     | 0.0031 | -1.43 | Normal down vs > 5 Years Off IS Tolerant |
| 217106_PM_x_at | DIMT1L          | DIM1 dimethyladenosine transferase 1-like ( <i>S. cerevisiae</i> )                      | 0.0031 | 1.42  | Normal up vs > 5 Years Off IS Tolerant   |
| 223070_PM_at   | SELK            | selenoprotein K                                                                         | 0.0031 | 1.65  | Normal up vs > 5 Years Off IS Tolerant   |
| 1570207_PM_at  | FRRS1           | ferric-chelate reductase 1                                                              | 0.0031 | -1.36 | Normal down vs > 5 Years Off IS Tolerant |
| 216619_PM_at   | GTPBP10         | GTP-binding protein 10 (putative)                                                       | 0.0031 | -1.46 | Normal down vs > 5 Years Off IS Tolerant |
| 211460_PM_at   | TTY9A /// TTY9B | testis-specific transcript, Y-linked 9A (non-protein coding) /// testis-specific transc | 0.0031 | -1.77 | Normal down vs > 5 Years Off IS Tolerant |
| 228722_PM_at   | PRMT2           | protein arginine methyltransferase 2                                                    | 0.0031 | 2.13  | Normal up vs > 5 Years Off IS Tolerant   |
| 221983_PM_at   | FAM134A         | family with sequence similarity 134, member A                                           | 0.0031 | 1.46  | Normal up vs > 5 Years Off IS Tolerant   |
| 221945_PM_at   | FBXO41          | F-box protein 41                                                                        | 0.0031 | 1.30  | Normal up vs > 5 Years Off IS Tolerant   |
| 217722_PM_s_at | NGRN            | neugrin, neurite outgrowth associated                                                   | 0.0031 | 1.74  | Normal up vs > 5 Years Off IS Tolerant   |
| 240189_PM_at   | ACOXL           | acyl-CoA oxidase-like                                                                   | 0.0031 | -1.31 | Normal down vs > 5 Years Off IS Tolerant |
| 229211_PM_at   | DUSP28          | dual specificity phosphatase 28                                                         | 0.0031 | 1.56  | Normal up vs > 5 Years Off IS Tolerant   |
| 210172_PM_at   | SF1             | splicing factor 1                                                                       | 0.0031 | 1.95  | Normal up vs > 5 Years Off IS Tolerant   |
| 235569_PM_at   | VPS37D          | vacuolar protein sorting 37 homolog D ( <i>S. cerevisiae</i> )                          | 0.0031 | -1.59 | Normal down vs > 5 Years Off IS Tolerant |
| 209042_PM_s_at | UBE2G2          | ubiquitin-conjugating enzyme E2G 2 (UBC7 homolog, yeast)                                | 0.0031 | 1.28  | Normal up vs > 5 Years Off IS Tolerant   |
| 210011_PM_s_at | EWSR1           | Ewing sarcoma breakpoint region 1                                                       | 0.0031 | 1.32  | Normal up vs > 5 Years Off IS Tolerant   |

|                |                         |                                                                                         |        |       |                                          |
|----------------|-------------------------|-----------------------------------------------------------------------------------------|--------|-------|------------------------------------------|
| 223865_PM_at   | SOX6                    | SRY (sex determining region Y)-box 6                                                    | 0.0031 | -1.63 | Normal down vs > 5 Years Off IS Tolerant |
| 213075_PM_at   | OLFML2A                 | olfactomedin-like 2A                                                                    | 0.0031 | -1.28 | Normal down vs > 5 Years Off IS Tolerant |
| 203918_PM_at   | PCDH1                   | protocadherin 1                                                                         | 0.0031 | -1.35 | Normal down vs > 5 Years Off IS Tolerant |
| 217956_PM_s_at | ENOPH1                  | enolase-phosphatase 1                                                                   | 0.0032 | 1.42  | Normal up vs > 5 Years Off IS Tolerant   |
| 219810_PM_at   | VCPIP1                  | valosin containing protein (p97)/p47 complex interacting protein 1                      | 0.0032 | 1.86  | Normal up vs > 5 Years Off IS Tolerant   |
| 209230_PM_s_at | NUPR1                   | nuclear protein, transcriptional regulator, 1                                           | 0.0032 | -1.33 | Normal down vs > 5 Years Off IS Tolerant |
| 215368_PM_at   | NEB                     | nebulin                                                                                 | 0.0032 | -1.35 | Normal down vs > 5 Years Off IS Tolerant |
| 204876_PM_at   | ZNF646                  | zinc finger protein 646                                                                 | 0.0032 | -1.45 | Normal down vs > 5 Years Off IS Tolerant |
| 204555_PM_s_at | PPP1R3D                 | protein phosphatase 1, regulatory (inhibitor) subunit 3D                                | 0.0032 | -1.44 | Normal down vs > 5 Years Off IS Tolerant |
| 235598_PM_at   | SMAD2                   | SMAD family member 2                                                                    | 0.0032 | -1.64 | Normal down vs > 5 Years Off IS Tolerant |
| 212893_PM_at   | ZZZ3                    | zinc finger, ZZ-type containing 3                                                       | 0.0032 | 1.47  | Normal up vs > 5 Years Off IS Tolerant   |
| 203794_PM_at   | CDC42BPA                | CDC42 binding protein kinase alpha (DMPK-like)                                          | 0.0032 | -1.54 | Normal down vs > 5 Years Off IS Tolerant |
| 221206_PM_at   | PMS2 /// PMS2CL         | PMS2 postmeiotic segregation increased 2 (S. cerevisiae) /// PMS2 C-terminal like pseud | 0.0032 | 1.49  | Normal up vs > 5 Years Off IS Tolerant   |
| 201502_PM_s_at | NFKBIA                  | nuclear factor of kappa light polypeptide gene enhancer in B-cells inhibitor, alpha     | 0.0032 | 1.79  | Normal up vs > 5 Years Off IS Tolerant   |
| 211542_PM_x_at | RPS10                   | ribosomal protein S10                                                                   | 0.0032 | 1.20  | Normal up vs > 5 Years Off IS Tolerant   |
| 233191_PM_at   | RUFY2                   | RUN and FYVE domain containing 2                                                        | 0.0032 | 1.50  | Normal up vs > 5 Years Off IS Tolerant   |
| 218921_PM_at   | LOC100294402 /// SIGIRR | single Ig IL-1-related receptor-like /// single immunoglobulin and toll-interleukin 1 r | 0.0032 | 1.47  | Normal up vs > 5 Years Off IS Tolerant   |
| 230054_PM_at   | LOC100507547            | hypothetical LOC100507547                                                               | 0.0032 | -1.28 | Normal down vs > 5 Years Off IS Tolerant |
| 225746_PM_at   | RAB11FIP4               | RAB11 family interacting protein 4 (class II)                                           | 0.0032 | 1.57  | Normal up vs > 5 Years Off IS Tolerant   |
| 224634_PM_at   | GPATCH4                 | G patch domain containing 4                                                             | 0.0032 | 1.60  | Normal up vs > 5 Years Off IS Tolerant   |
| 1560175_PM_at  | PPP4R1L                 | protein phosphatase 4, regulatory subunit 1-like                                        | 0.0032 | -1.33 | Normal down vs > 5 Years Off IS Tolerant |
| 203672_PM_x_at | TPMT                    | thiopurine S-methyltransferase                                                          | 0.0032 | -2.05 | Normal down vs > 5 Years Off IS Tolerant |
| 224587_PM_at   | SUB1                    | SUB1 homolog (S. cerevisiae)                                                            | 0.0032 | 1.74  | Normal up vs > 5 Years Off IS Tolerant   |



|                 |          |                                                                                          |        |       |                                          |
|-----------------|----------|------------------------------------------------------------------------------------------|--------|-------|------------------------------------------|
| 235881_PM_at    | FMNL2    | Formin-like 2                                                                            | 0.0032 | -1.44 | Normal down vs > 5 Years Off IS Tolerant |
| 219213_PM_at    | JAM2     | junctional adhesion molecule 2                                                           | 0.0032 | -1.48 | Normal down vs > 5 Years Off IS Tolerant |
| 207205_PM_at    | CEACAM4  | carcinoembryonic antigen-related cell adhesion molecule 4                                | 0.0032 | -1.48 | Normal down vs > 5 Years Off IS Tolerant |
| 230104_PM_s_at  | TPPP     | tubulin polymerization promoting protein                                                 | 0.0032 | 1.38  | Normal up vs > 5 Years Off IS Tolerant   |
| 209017_PM_s_at  | LONP1    | lon peptidase 1, mitochondrial                                                           | 0.0032 | 1.44  | Normal up vs > 5 Years Off IS Tolerant   |
| 1562919_PM_at   | FAM45A   | Family with sequence similarity 45, member A                                             | 0.0032 | -1.31 | Normal down vs > 5 Years Off IS Tolerant |
| 53912_PM_at     | SNX11    | sorting nexin 11                                                                         | 0.0032 | -1.28 | Normal down vs > 5 Years Off IS Tolerant |
| 217632_PM_at    | GNL3L    | guanine nucleotide binding protein-like 3 (nucleolar)-like                               | 0.0032 | -1.31 | Normal down vs > 5 Years Off IS Tolerant |
| 226282_PM_at    | PTPN14   | protein tyrosine phosphatase, non-receptor type 14                                       | 0.0032 | -1.51 | Normal down vs > 5 Years Off IS Tolerant |
| 1554636_PM_at   | ---      | ---                                                                                      | 0.0032 | 2.02  | Normal up vs > 5 Years Off IS Tolerant   |
| 208008_PM_at    | TBC1D29  | TBC1 domain family, member 29                                                            | 0.0032 | -1.33 | Normal down vs > 5 Years Off IS Tolerant |
| 222525_PM_s_at  | CCDC25   | coiled-coil domain containing 25                                                         | 0.0032 | 1.61  | Normal up vs > 5 Years Off IS Tolerant   |
| 202637_PM_s_at  | ICAM1    | intercellular adhesion molecule 1                                                        | 0.0032 | 3.42  | Normal up vs > 5 Years Off IS Tolerant   |
| 202931_PM_x_at  | BIN1     | bridging integrator 1                                                                    | 0.0032 | 1.84  | Normal up vs > 5 Years Off IS Tolerant   |
| 228166_PM_at    | ALG2     | Asparagine-linked glycosylation 2, alpha-1,3-mannosyltransferase homolog (S. cerevisiae) | 0.0032 | -1.39 | Normal down vs > 5 Years Off IS Tolerant |
| 1558552_PM_s_at | C3orf55  | chromosome 3 open reading frame 55                                                       | 0.0032 | -1.28 | Normal down vs > 5 Years Off IS Tolerant |
| 1567242_PM_at   | OR2L1P   | olfactory receptor, family 2, subfamily L, member 1 pseudogene                           | 0.0032 | -1.33 | Normal down vs > 5 Years Off IS Tolerant |
| 220859_PM_at    | ---      | ---                                                                                      | 0.0032 | -1.68 | Normal down vs > 5 Years Off IS Tolerant |
| 228136_PM_s_at  | C17orf70 | Chromosome 17 open reading frame 70                                                      | 0.0032 | -1.32 | Normal down vs > 5 Years Off IS Tolerant |
| 206326_PM_at    | GRP      | gastrin-releasing peptide                                                                | 0.0032 | -1.37 | Normal down vs > 5 Years Off IS Tolerant |
| 225731_PM_at    | ANKRD50  | ankyrin repeat domain 50                                                                 | 0.0032 | -2.09 | Normal down vs > 5 Years Off IS Tolerant |
| 224841_PM_x_at  | GAS5     | growth arrest-specific 5 (non-protein coding)                                            | 0.0032 | 1.59  | Normal up vs > 5 Years Off IS Tolerant   |
| 228168_PM_at    | ATP5G3   | ATP synthase, H+ transporting, mitochondrial Fo complex, subunit C3 (subunit 9)          | 0.0032 | -1.49 | Normal down vs > 5 Years Off IS Tolerant |

|                 |              |                                                                              |        |       |                                          |
|-----------------|--------------|------------------------------------------------------------------------------|--------|-------|------------------------------------------|
| 209151_PM_x_at  | TCF3         | transcription factor 3 (E2A immunoglobulin enhancer binding factors E12/E47) | 0.0032 | 1.30  | Normal up vs > 5 Years Off IS Tolerant   |
| 238901_PM_at    | LOC100505633 | hypothetical LOC100505633                                                    | 0.0032 | -1.29 | Normal down vs > 5 Years Off IS Tolerant |
| 208491_PM_s_at  | PGM5         | phosphoglucomutase 5                                                         | 0.0032 | -1.28 | Normal down vs > 5 Years Off IS Tolerant |
| 230189_PM_x_at  | NELF         | Nasal embryonic LHRH factor                                                  | 0.0032 | -1.25 | Normal down vs > 5 Years Off IS Tolerant |
| 239659_PM_at    | ---          | ---                                                                          | 0.0032 | 1.42  | Normal up vs > 5 Years Off IS Tolerant   |
| 1556629_PM_a_at | SNAP25       | Synaptosomal-associated protein, 25kDa                                       | 0.0032 | -1.88 | Normal down vs > 5 Years Off IS Tolerant |
| 1558590_PM_at   | METT11D1     | methyltransferase 11 domain containing 1                                     | 0.0032 | -1.57 | Normal down vs > 5 Years Off IS Tolerant |
| 210387_PM_at    | HIST1H2BG    | histone cluster 1, H2bg                                                      | 0.0032 | 3.55  | Normal up vs > 5 Years Off IS Tolerant   |
| 212914_PM_at    | CBX7         | chromobox homolog 7                                                          | 0.0032 | 1.52  | Normal up vs > 5 Years Off IS Tolerant   |
| 224731_PM_at    | HMGB1        | high-mobility group box 1                                                    | 0.0032 | 1.20  | Normal up vs > 5 Years Off IS Tolerant   |
| 223652_PM_at    | AS3MT        | arsenic (+3 oxidation state) methyltransferase                               | 0.0032 | -1.32 | Normal down vs > 5 Years Off IS Tolerant |
| 230738_PM_at    | LOC730631    | Hypothetical LOC730631                                                       | 0.0032 | -1.66 | Normal down vs > 5 Years Off IS Tolerant |
| 222286_PM_at    | SNAPC3       | small nuclear RNA activating complex, polypeptide 3, 50kDa                   | 0.0032 | -1.64 | Normal down vs > 5 Years Off IS Tolerant |
| 216705_PM_s_at  | ADA          | adenosine deaminase                                                          | 0.0032 | 1.86  | Normal up vs > 5 Years Off IS Tolerant   |
| 1556735_PM_at   | ---          | ---                                                                          | 0.0032 | -2.27 | Normal down vs > 5 Years Off IS Tolerant |
| 237620_PM_at    | ODF3L2       | outer dense fiber of sperm tails 3-like 2                                    | 0.0032 | -1.39 | Normal down vs > 5 Years Off IS Tolerant |
| 244711_PM_at    | ---          | ---                                                                          | 0.0032 | -1.26 | Normal down vs > 5 Years Off IS Tolerant |
| 240648_PM_at    | ---          | ---                                                                          | 0.0032 | -1.55 | Normal down vs > 5 Years Off IS Tolerant |
| 242713_PM_at    | ---          | ---                                                                          | 0.0032 | -1.29 | Normal down vs > 5 Years Off IS Tolerant |
| 32062_PM_at     | LRRC14       | leucine rich repeat containing 14                                            | 0.0032 | 1.28  | Normal up vs > 5 Years Off IS Tolerant   |
| 206329_PM_at    | EXTL1        | exostoses (multiple)-like 1                                                  | 0.0033 | -1.29 | Normal down vs > 5 Years Off IS Tolerant |
| 217838_PM_s_at  | EVL          | Enah/Vasp-like                                                               | 0.0033 | 1.53  | Normal up vs > 5 Years Off IS Tolerant   |
| 1557620_PM_a_at | CCDC38       | coiled-coil domain containing 38                                             | 0.0033 | -1.31 | Normal down vs > 5 Years Off IS Tolerant |

|                 |                      |                                                                                         |        |       |                                          |
|-----------------|----------------------|-----------------------------------------------------------------------------------------|--------|-------|------------------------------------------|
| 227053_PM_at    | PACSIN1              | protein kinase C and casein kinase substrate in neurons 1                               | 0.0033 | 1.72  | Normal up vs > 5 Years Off IS Tolerant   |
| 202511_PM_s_at  | ATG5                 | ATG5 autophagy related 5 homolog (S. cerevisiae)                                        | 0.0033 | 1.37  | Normal up vs > 5 Years Off IS Tolerant   |
| 222784_PM_at    | SMOC1                | SPARC related modular calcium binding 1                                                 | 0.0033 | -1.55 | Normal down vs > 5 Years Off IS Tolerant |
| 229545_PM_at    | FERMT1               | fermitin family member 1                                                                | 0.0033 | -1.32 | Normal down vs > 5 Years Off IS Tolerant |
| 64432_PM_at     | C12orf47             | chromosome 12 open reading frame 47                                                     | 0.0033 | 1.76  | Normal up vs > 5 Years Off IS Tolerant   |
| 234400_PM_at    | ---                  | ---                                                                                     | 0.0033 | -1.33 | Normal down vs > 5 Years Off IS Tolerant |
| 224114_PM_at    | ---                  | ---                                                                                     | 0.0033 | -2.02 | Normal down vs > 5 Years Off IS Tolerant |
| 208535_PM_x_at  | COL13A1              | collagen, type XIII, alpha 1                                                            | 0.0033 | -1.45 | Normal down vs > 5 Years Off IS Tolerant |
| 213414_PM_s_at  | RPS19                | ribosomal protein S19                                                                   | 0.0033 | 1.13  | Normal up vs > 5 Years Off IS Tolerant   |
| 212139_PM_at    | GCN1L1               | GCN1 general control of amino-acid synthesis 1-like 1 (yeast)                           | 0.0033 | 1.35  | Normal up vs > 5 Years Off IS Tolerant   |
| 213914_PM_s_at  | SPTBN1               | Spectrin, beta, non-erythrocytic 1                                                      | 0.0033 | -1.23 | Normal down vs > 5 Years Off IS Tolerant |
| 236460_PM_at    | ---                  | ---                                                                                     | 0.0033 | 1.64  | Normal up vs > 5 Years Off IS Tolerant   |
| 204311_PM_at    | ATP1B2               | ATPase, Na+/K+ transporting, beta 2 polypeptide                                         | 0.0033 | -1.37 | Normal down vs > 5 Years Off IS Tolerant |
| 210948_PM_s_at  | LEF1                 | lymphoid enhancer-binding factor 1                                                      | 0.0033 | 2.78  | Normal up vs > 5 Years Off IS Tolerant   |
| 221804_PM_s_at  | FAM45A ///<br>FAM45B | family with sequence similarity 45, member A /// family with sequence similarity 45, me | 0.0033 | -1.28 | Normal down vs > 5 Years Off IS Tolerant |
| 244189_PM_at    | TTC28-AS             | TTC28 antisense RNA (non-protein coding)                                                | 0.0033 | 1.51  | Normal up vs > 5 Years Off IS Tolerant   |
| 1563949_PM_at   | ---                  | ---                                                                                     | 0.0033 | -1.34 | Normal down vs > 5 Years Off IS Tolerant |
| 215579_PM_at    | APOBEC3G             | apolipoprotein B mRNA editing enzyme, catalytic polypeptide-like 3G                     | 0.0033 | -1.38 | Normal down vs > 5 Years Off IS Tolerant |
| 206589_PM_at    | GFI1                 | growth factor independent 1 transcription repressor                                     | 0.0033 | 1.85  | Normal up vs > 5 Years Off IS Tolerant   |
| 236473_PM_at    | CC2D2A               | coiled-coil and C2 domain containing 2A                                                 | 0.0033 | -1.38 | Normal down vs > 5 Years Off IS Tolerant |
| 231714_PM_s_at  | AP4B1                | adaptor-related protein complex 4, beta 1 subunit                                       | 0.0033 | 1.36  | Normal up vs > 5 Years Off IS Tolerant   |
| 1567181_PM_x_at | ---                  | ---                                                                                     | 0.0033 | -1.33 | Normal down vs > 5 Years Off IS Tolerant |
| 220940_PM_at    | ANKRD36B             | ankyrin repeat domain 36B                                                               | 0.0033 | 1.71  | Normal up vs > 5 Years Off IS Tolerant   |
| 228442_PM_at    | NFATC2               | nuclear factor of activated T-cells, cytoplasmic, calcineurin-dependent 2               | 0.0033 | 2.01  | Normal up vs > 5 Years Off IS Tolerant   |

|                 |            |                                                                               |        |       |                                          |
|-----------------|------------|-------------------------------------------------------------------------------|--------|-------|------------------------------------------|
| 213890_PM_x_at  | RPS16      | ribosomal protein S16                                                         | 0.0033 | 1.13  | Normal up vs > 5 Years Off IS Tolerant   |
| 242971_PM_at    | ---        | ---                                                                           | 0.0033 | -1.35 | Normal down vs > 5 Years Off IS Tolerant |
| 1558214_PM_s_at | CTNNA1     | catenin (cadherin-associated protein), alpha 1, 102kDa                        | 0.0033 | -1.46 | Normal down vs > 5 Years Off IS Tolerant |
| 212083_PM_at    | TEX261     | testis expressed 261                                                          | 0.0033 | 1.51  | Normal up vs > 5 Years Off IS Tolerant   |
| 226835_PM_s_at  | NCRNA00275 | non-protein coding RNA 275                                                    | 0.0033 | 1.32  | Normal up vs > 5 Years Off IS Tolerant   |
| 200072_PM_s_at  | HNRNPM     | heterogeneous nuclear ribonucleoprotein M                                     | 0.0033 | 1.20  | Normal up vs > 5 Years Off IS Tolerant   |
| 217461_PM_x_at  | BTF3       | basic transcription factor 3                                                  | 0.0033 | 1.33  | Normal up vs > 5 Years Off IS Tolerant   |
| 204372_PM_s_at  | KHSRP      | KH-type splicing regulatory protein                                           | 0.0033 | 1.41  | Normal up vs > 5 Years Off IS Tolerant   |
| 227430_PM_at    | ZC3H10     | zinc finger CCCH-type containing 10                                           | 0.0033 | -1.34 | Normal down vs > 5 Years Off IS Tolerant |
| 207624_PM_s_at  | RPGR       | retinitis pigmentosa GTPase regulator                                         | 0.0033 | 1.82  | Normal up vs > 5 Years Off IS Tolerant   |
| 201176_PM_s_at  | ARCN1      | archain 1                                                                     | 0.0033 | 1.58  | Normal up vs > 5 Years Off IS Tolerant   |
| 220948_PM_s_at  | ATP1A1     | ATPase, Na <sup>+</sup> /K <sup>+</sup> transporting, alpha 1 polypeptide     | 0.0033 | 1.31  | Normal up vs > 5 Years Off IS Tolerant   |
| 221689_PM_s_at  | PIGP       | phosphatidylinositol glycan anchor biosynthesis, class P                      | 0.0033 | 1.81  | Normal up vs > 5 Years Off IS Tolerant   |
| 222408_PM_s_at  | YPEL5      | yippee-like 5 (Drosophila)                                                    | 0.0033 | 1.69  | Normal up vs > 5 Years Off IS Tolerant   |
| 237763_PM_at    | ---        | ---                                                                           | 0.0033 | -1.33 | Normal down vs > 5 Years Off IS Tolerant |
| 243168_PM_at    | ---        | ---                                                                           | 0.0033 | -1.32 | Normal down vs > 5 Years Off IS Tolerant |
| 223771_PM_at    | TMEM87A    | Transmembrane protein 87A                                                     | 0.0033 | 1.85  | Normal up vs > 5 Years Off IS Tolerant   |
| 214444_PM_s_at  | PVR        | poliovirus receptor                                                           | 0.0033 | -1.31 | Normal down vs > 5 Years Off IS Tolerant |
| 203523_PM_at    | LSP1       | lymphocyte-specific protein 1                                                 | 0.0034 | -1.52 | Normal down vs > 5 Years Off IS Tolerant |
| 223007_PM_s_at  | C9orf5     | chromosome 9 open reading frame 5                                             | 0.0034 | 1.66  | Normal up vs > 5 Years Off IS Tolerant   |
| 214398_PM_s_at  | IKBKE      | inhibitor of kappa light polypeptide gene enhancer in B-cells, kinase epsilon | 0.0034 | 1.89  | Normal up vs > 5 Years Off IS Tolerant   |
| 223763_PM_at    | DTNBP1     | dystrobrevin binding protein 1                                                | 0.0034 | -1.43 | Normal down vs > 5 Years Off IS Tolerant |
| 242973_PM_at    | CACNA1C    | calcium channel, voltage-dependent, L type, alpha 1C subunit                  | 0.0034 | -1.27 | Normal down vs > 5 Years Off IS Tolerant |
| 214839_PM_at    | LOC157627  | hypothetical LOC157627                                                        | 0.0034 | -1.40 | Normal down vs > 5 Years Off IS Tolerant |
| 217249_PM_x_at  | ---        | ---                                                                           | 0.0034 | 1.36  | Normal up vs > 5 Years Off IS Tolerant   |
| 240795_PM_at    | ---        | ---                                                                           | 0.0034 | -1.28 | Normal down vs > 5 Years Off IS Tolerant |

|                |                         |                                                                                |        |       |                                          |
|----------------|-------------------------|--------------------------------------------------------------------------------|--------|-------|------------------------------------------|
| 218464_PM_s_at | C17orf63                | chromosome 17 open reading frame 63                                            | 0.0034 | 1.41  | Normal up vs > 5 Years Off IS Tolerant   |
| 207857_PM_at   | LILRA2                  | leukocyte immunoglobulin-like receptor, subfamily A (with TM domain), member 2 | 0.0034 | -1.62 | Normal down vs > 5 Years Off IS Tolerant |
| 201845_PM_s_at | RYBP                    | RING1 and YY1 binding protein                                                  | 0.0034 | 1.52  | Normal up vs > 5 Years Off IS Tolerant   |
| 207267_PM_s_at | DSCR6                   | Down syndrome critical region gene 6                                           | 0.0034 | -1.40 | Normal down vs > 5 Years Off IS Tolerant |
| 239304_PM_at   | MFSD4                   | major facilitator superfamily domain containing 4                              | 0.0034 | -1.35 | Normal down vs > 5 Years Off IS Tolerant |
| 203504_PM_s_at | ABCA1                   | ATP-binding cassette, sub-family A (ABC1), member 1                            | 0.0034 | 3.33  | Normal up vs > 5 Years Off IS Tolerant   |
| 237832_PM_at   | ---                     | ---                                                                            | 0.0034 | -1.77 | Normal down vs > 5 Years Off IS Tolerant |
| 208650_PM_s_at | CD24                    | CD24 molecule                                                                  | 0.0034 | 2.73  | Normal up vs > 5 Years Off IS Tolerant   |
| 206140_PM_at   | LHX2                    | LIM homeobox 2                                                                 | 0.0034 | -1.21 | Normal down vs > 5 Years Off IS Tolerant |
| 208094_PM_s_at | CCDC130                 | coiled-coil domain containing 130                                              | 0.0034 | 1.44  | Normal up vs > 5 Years Off IS Tolerant   |
| 1564231_PM_at  | IFT80                   | intraflagellar transport 80 homolog (Chlamydomonas)                            | 0.0034 | -1.42 | Normal down vs > 5 Years Off IS Tolerant |
| 241262_PM_at   | LOC100505728            | hypothetical LOC100505728                                                      | 0.0034 | 1.40  | Normal up vs > 5 Years Off IS Tolerant   |
| 244143_PM_at   | ---                     | ---                                                                            | 0.0034 | -1.44 | Normal down vs > 5 Years Off IS Tolerant |
| 233075_PM_at   | HERC2P7                 | hect domain and RLD 2 pseudogene 7                                             | 0.0034 | -1.61 | Normal down vs > 5 Years Off IS Tolerant |
| 227073_PM_at   | LOC100506904 /// MAP3K2 | hypothetical LOC100506904 /// mitogen-activated protein kinase kinase kinase 2 | 0.0034 | 1.83  | Normal up vs > 5 Years Off IS Tolerant   |
| 200867_PM_at   | RNF114                  | ring finger protein 114                                                        | 0.0034 | 1.45  | Normal up vs > 5 Years Off IS Tolerant   |
| 214299_PM_at   | TOP3A                   | topoisomerase (DNA) III alpha                                                  | 0.0034 | -1.35 | Normal down vs > 5 Years Off IS Tolerant |
| 224009_PM_x_at | DHRS9                   | dehydrogenase/reductase (SDR family) member 9                                  | 0.0034 | -2.52 | Normal down vs > 5 Years Off IS Tolerant |
| 243356_PM_at   | ---                     | ---                                                                            | 0.0034 | -1.81 | Normal down vs > 5 Years Off IS Tolerant |
| 233372_PM_at   | ---                     | ---                                                                            | 0.0034 | -1.23 | Normal down vs > 5 Years Off IS Tolerant |
| 235292_PM_at   | FLJ32255                | hypothetical LOC643977                                                         | 0.0034 | 2.26  | Normal up vs > 5 Years Off IS Tolerant   |
| 240530_PM_at   | ---                     | ---                                                                            | 0.0034 | 1.32  | Normal up vs > 5 Years Off IS Tolerant   |
| 220534_PM_at   | TRIM48                  | tripartite motif-containing 48                                                 | 0.0034 | -1.90 | Normal down vs > 5 Years Off IS Tolerant |
| 235158_PM_at   | TMEM209                 | transmembrane protein 209                                                      | 0.0034 | 1.78  | Normal up vs > 5 Years Off IS Tolerant   |

|                 |              |                                                                                         |        |       |                                          |
|-----------------|--------------|-----------------------------------------------------------------------------------------|--------|-------|------------------------------------------|
| 212988_PM_x_at  | ACTG1        | actin, gamma 1                                                                          | 0.0034 | -1.15 | Normal down vs > 5 Years Off IS Tolerant |
| 223376_PM_s_at  | BRI3         | brain protein I3                                                                        | 0.0034 | -1.46 | Normal down vs > 5 Years Off IS Tolerant |
| 206651_PM_s_at  | CPB2         | carboxypeptidase B2 (plasma)                                                            | 0.0034 | -1.35 | Normal down vs > 5 Years Off IS Tolerant |
| 215736_PM_at    | ---          | ---                                                                                     | 0.0034 | -1.95 | Normal down vs > 5 Years Off IS Tolerant |
| 1561262_PM_at   | ---          | ---                                                                                     | 0.0034 | -1.65 | Normal down vs > 5 Years Off IS Tolerant |
| 209350_PM_s_at  | GPS2         | G protein pathway suppressor 2                                                          | 0.0034 | 1.47  | Normal up vs > 5 Years Off IS Tolerant   |
| 1555729_PM_a_at | CD209        | CD209 molecule                                                                          | 0.0034 | -1.31 | Normal down vs > 5 Years Off IS Tolerant |
| 230422_PM_at    | FPR3         | formyl peptide receptor 3                                                               | 0.0034 | -1.74 | Normal down vs > 5 Years Off IS Tolerant |
| 202176_PM_at    | ERCC3        | excision repair cross-complementing rodent repair deficiency, complementation group 3 ( | 0.0034 | 1.42  | Normal up vs > 5 Years Off IS Tolerant   |
| 222473_PM_s_at  | ERBB2IP      | erb2 interacting protein                                                                | 0.0034 | 1.30  | Normal up vs > 5 Years Off IS Tolerant   |
| 222009_PM_at    | CEMP1        | cementum protein 1                                                                      | 0.0034 | -1.32 | Normal down vs > 5 Years Off IS Tolerant |
| 208950_PM_s_at  | ALDH7A1      | aldehyde dehydrogenase 7 family, member A1                                              | 0.0034 | -1.31 | Normal down vs > 5 Years Off IS Tolerant |
| 237042_PM_at    | LOC100507789 | hypothetical LOC100507789                                                               | 0.0034 | -1.37 | Normal down vs > 5 Years Off IS Tolerant |
| 1553695_PM_a_at | NLRX1        | NLR family member X1                                                                    | 0.0034 | -1.29 | Normal down vs > 5 Years Off IS Tolerant |
| 216278_PM_at    | ---          | ---                                                                                     | 0.0034 | 1.72  | Normal up vs > 5 Years Off IS Tolerant   |
| 204471_PM_at    | GAP43        | growth associated protein 43                                                            | 0.0034 | -1.39 | Normal down vs > 5 Years Off IS Tolerant |
| 1558473_PM_at   | ---          | ---                                                                                     | 0.0034 | -1.69 | Normal down vs > 5 Years Off IS Tolerant |
| 234011_PM_at    | MGC16384     | Hypothetical LOC114130                                                                  | 0.0035 | -1.55 | Normal down vs > 5 Years Off IS Tolerant |
| 233694_PM_at    | HSPA1L       | Heat shock 70kDa protein 1-like                                                         | 0.0035 | -1.46 | Normal down vs > 5 Years Off IS Tolerant |
| 219433_PM_at    | BCOR         | BCL6 corepressor                                                                        | 0.0035 | 2.12  | Normal up vs > 5 Years Off IS Tolerant   |
| 221266_PM_s_at  | TM7SF4       | transmembrane 7 superfamily member 4                                                    | 0.0035 | -1.30 | Normal down vs > 5 Years Off IS Tolerant |
| 242864_PM_at    | ZNF554       | zinc finger protein 554                                                                 | 0.0035 | 1.31  | Normal up vs > 5 Years Off IS Tolerant   |

|                |              |                                                                                        |        |       |                                          |
|----------------|--------------|----------------------------------------------------------------------------------------|--------|-------|------------------------------------------|
| 1562908_PM_at  | LOC339468    | hypothetical protein LOC339468                                                         | 0.0035 | -1.54 | Normal down vs > 5 Years Off IS Tolerant |
| 240169_PM_at   | ---          | ---                                                                                    | 0.0035 | -1.50 | Normal down vs > 5 Years Off IS Tolerant |
| 215814_PM_at   | DST          | Dystonin                                                                               | 0.0035 | -1.24 | Normal down vs > 5 Years Off IS Tolerant |
| 1560659_PM_at  | ---          | ---                                                                                    | 0.0035 | 1.73  | Normal up vs > 5 Years Off IS Tolerant   |
| 216095_PM_x_at | MTMR1        | myotubularin related protein 1                                                         | 0.0035 | 1.27  | Normal up vs > 5 Years Off IS Tolerant   |
| 243575_PM_at   | MAST4        | microtubule associated serine/threonine kinase family member 4                         | 0.0035 | -1.29 | Normal down vs > 5 Years Off IS Tolerant |
| 207850_PM_at   | CXCL3        | chemokine (C-X-C motif) ligand 3                                                       | 0.0035 | 3.57  | Normal up vs > 5 Years Off IS Tolerant   |
| 226421_PM_at   | AMMECR1      | Alport syndrome, mental retardation, midface hypoplasia and elliptocytosis chromosomal | 0.0035 | 1.91  | Normal up vs > 5 Years Off IS Tolerant   |
| 237858_PM_s_at | MTUS2        | Microtubule associated tumor suppressor candidate 2                                    | 0.0035 | 1.43  | Normal up vs > 5 Years Off IS Tolerant   |
| 217542_PM_at   | MDM2         | Mdm2 p53 binding protein homolog (mouse)                                               | 0.0035 | -1.37 | Normal down vs > 5 Years Off IS Tolerant |
| 212786_PM_at   | CLEC16A      | C-type lectin domain family 16, member A                                               | 0.0035 | 1.38  | Normal up vs > 5 Years Off IS Tolerant   |
| 222841_PM_s_at | TIMM22       | translocase of inner mitochondrial membrane 22 homolog (yeast)                         | 0.0035 | 1.53  | Normal up vs > 5 Years Off IS Tolerant   |
| 238439_PM_at   | ANKRD22      | ankyrin repeat domain 22                                                               | 0.0035 | -2.15 | Normal down vs > 5 Years Off IS Tolerant |
| 237090_PM_at   | LOC100506113 | hypothetical LOC100506113                                                              | 0.0035 | -1.29 | Normal down vs > 5 Years Off IS Tolerant |
| 228217_PM_s_at | PSMG4        | proteasome (prosome, macropain) assembly chaperone 4                                   | 0.0035 | 1.75  | Normal up vs > 5 Years Off IS Tolerant   |
| 229575_PM_at   | ---          | ---                                                                                    | 0.0035 | 1.59  | Normal up vs > 5 Years Off IS Tolerant   |
| 224153_PM_s_at | C14orf167    | chromosome 14 open reading frame 167                                                   | 0.0035 | -1.41 | Normal down vs > 5 Years Off IS Tolerant |
| 212746_PM_s_at | CEP170       | centrosomal protein 170kDa                                                             | 0.0035 | -1.54 | Normal down vs > 5 Years Off IS Tolerant |
| 227066_PM_at   | MOBKL2C      | MOB1, Mps One Binder kinase activator-like 2C (yeast)                                  | 0.0035 | -1.58 | Normal down vs > 5 Years Off IS Tolerant |
| 203824_PM_at   | TSPAN8       | tetraspanin 8                                                                          | 0.0035 | -1.42 | Normal down vs > 5 Years Off IS Tolerant |
| 222916_PM_s_at | HDLBP        | high density lipoprotein binding protein                                               | 0.0035 | 1.40  | Normal up vs > 5 Years Off IS Tolerant   |
| 229288_PM_at   | EPHA7        | EPH receptor A7                                                                        | 0.0035 | -1.89 | Normal down vs > 5 Years Off IS Tolerant |

|                 |              |                                                          |        |       |                                          |
|-----------------|--------------|----------------------------------------------------------|--------|-------|------------------------------------------|
| 244167_PM_at    | ---          | ---                                                      | 0.0035 | -1.85 | Normal down vs > 5 Years Off IS Tolerant |
| 236622_PM_at    | PIGM         | phosphatidylinositol glycan anchor biosynthesis, class M | 0.0035 | -1.42 | Normal down vs > 5 Years Off IS Tolerant |
| 1566665_PM_at   | C13orf40     | chromosome 13 open reading frame 40                      | 0.0035 | -1.70 | Normal down vs > 5 Years Off IS Tolerant |
| 234907_PM_x_at  | ---          | ---                                                      | 0.0035 | 2.22  | Normal up vs > 5 Years Off IS Tolerant   |
| 212316_PM_at    | NUP210       | nucleoporin 210kDa                                       | 0.0035 | 1.46  | Normal up vs > 5 Years Off IS Tolerant   |
| 200838_PM_at    | CTSB         | cathepsin B                                              | 0.0035 | -1.58 | Normal down vs > 5 Years Off IS Tolerant |
| 200016_PM_x_at  | HNRNPA1      | heterogeneous nuclear ribonucleoprotein A1               | 0.0035 | 1.11  | Normal up vs > 5 Years Off IS Tolerant   |
| 238881_PM_at    | ---          | ---                                                      | 0.0035 | -1.35 | Normal down vs > 5 Years Off IS Tolerant |
| 239982_PM_at    | ---          | ---                                                      | 0.0035 | 1.44  | Normal up vs > 5 Years Off IS Tolerant   |
| 212847_PM_at    | FUBP1        | Far upstream element (FUSE) binding protein 1            | 0.0035 | 1.50  | Normal up vs > 5 Years Off IS Tolerant   |
| 241011_PM_at    | ---          | ---                                                      | 0.0035 | -1.32 | Normal down vs > 5 Years Off IS Tolerant |
| 38447_PM_at     | ADRBK1       | adrenergic, beta, receptor kinase 1                      | 0.0035 | -1.46 | Normal down vs > 5 Years Off IS Tolerant |
| 1554971_PM_at   | OK/SW-CL.58  | OK/SW-CL.58                                              | 0.0035 | 1.41  | Normal up vs > 5 Years Off IS Tolerant   |
| 243311_PM_at    | DEFB132      | defensin, beta 132                                       | 0.0035 | -1.46 | Normal down vs > 5 Years Off IS Tolerant |
| 211552_PM_s_at  | ALDH4A1      | aldehyde dehydrogenase 4 family, member A1               | 0.0035 | -1.34 | Normal down vs > 5 Years Off IS Tolerant |
| 226374_PM_at    | CXADR        | coxsackie virus and adenovirus receptor                  | 0.0035 | -1.28 | Normal down vs > 5 Years Off IS Tolerant |
| 1555759_PM_a_at | CCL5         | chemokine (C-C motif) ligand 5                           | 0.0035 | 2.10  | Normal up vs > 5 Years Off IS Tolerant   |
| 233356_PM_at    | ---          | ---                                                      | 0.0035 | -1.55 | Normal down vs > 5 Years Off IS Tolerant |
| 234026_PM_at    | EML2         | Echinoderm microtubule associated protein like 2         | 0.0035 | -1.49 | Normal down vs > 5 Years Off IS Tolerant |
| 244286_PM_at    | ---          | ---                                                      | 0.0035 | 1.88  | Normal up vs > 5 Years Off IS Tolerant   |
| 221955_PM_at    | ---          | ---                                                      | 0.0035 | -1.29 | Normal down vs > 5 Years Off IS Tolerant |
| 1564012_PM_at   | LOC100132354 | hypothetical LOC100132354                                | 0.0035 | -1.33 | Normal down vs > 5 Years Off IS Tolerant |
| 224419_PM_x_at  | PMCHL1       | pro-melanin-concentrating hormone-like 1, pseudogene     | 0.0035 | -1.59 | Normal down vs > 5 Years Off IS Tolerant |



|                 |          |                                                                           |        |       |                                          |
|-----------------|----------|---------------------------------------------------------------------------|--------|-------|------------------------------------------|
| 224111_PM_x_at  | KLF16    | Kruppel-like factor 16                                                    | 0.0035 | -1.41 | Normal down vs > 5 Years Off IS Tolerant |
| 1555526_PM_a_at | 6-Sep    | septin 6                                                                  | 0.0035 | 1.53  | Normal up vs > 5 Years Off IS Tolerant   |
| 211354_PM_s_at  | LEPR     | leptin receptor                                                           | 0.0035 | 1.39  | Normal up vs > 5 Years Off IS Tolerant   |
| 1558703_PM_at   | SLC46A1  | solute carrier family 46 (folate transporter), member 1                   | 0.0035 | -1.41 | Normal down vs > 5 Years Off IS Tolerant |
| 226096_PM_at    | FNDC5    | fibronectin type III domain containing 5                                  | 0.0035 | -1.34 | Normal down vs > 5 Years Off IS Tolerant |
| 215275_PM_at    | TRAF3IP3 | TRAF3 interacting protein 3                                               | 0.0035 | 1.74  | Normal up vs > 5 Years Off IS Tolerant   |
| 1561544_PM_at   | ---      | ---                                                                       | 0.0035 | -1.36 | Normal down vs > 5 Years Off IS Tolerant |
| 222200_PM_s_at  | BSDC1    | BSD domain containing 1                                                   | 0.0035 | 1.34  | Normal up vs > 5 Years Off IS Tolerant   |
| 222555_PM_s_at  | MRPL44   | mitochondrial ribosomal protein L44                                       | 0.0035 | 2.05  | Normal up vs > 5 Years Off IS Tolerant   |
| 224596_PM_at    | SLC44A1  | solute carrier family 44, member 1                                        | 0.0035 | 1.57  | Normal up vs > 5 Years Off IS Tolerant   |
| 212201_PM_at    | ANKLE2   | ankyrin repeat and LEM domain containing 2                                | 0.0035 | 1.59  | Normal up vs > 5 Years Off IS Tolerant   |
| 218440_PM_at    | MCCC1    | methylcrotonoyl-CoA carboxylase 1 (alpha)                                 | 0.0035 | 1.35  | Normal up vs > 5 Years Off IS Tolerant   |
| 1565857_PM_at   | ---      | ---                                                                       | 0.0035 | -1.40 | Normal down vs > 5 Years Off IS Tolerant |
| 224442_PM_at    | PHF6     | PHD finger protein 6                                                      | 0.0035 | -1.27 | Normal down vs > 5 Years Off IS Tolerant |
| 32540_PM_at     | ---      | ---                                                                       | 0.0035 | -1.43 | Normal down vs > 5 Years Off IS Tolerant |
| 242749_PM_at    | ---      | ---                                                                       | 0.0035 | 1.70  | Normal up vs > 5 Years Off IS Tolerant   |
| 226314_PM_at    | CHST14   | carbohydrate (N-acetylgalactosamine 4-0) sulfotransferase 14              | 0.0035 | -1.39 | Normal down vs > 5 Years Off IS Tolerant |
| 240762_PM_at    | ---      | ---                                                                       | 0.0036 | 1.88  | Normal up vs > 5 Years Off IS Tolerant   |
| 207366_PM_at    | KCNS1    | potassium voltage-gated channel, delayed-rectifier, subfamily S, member 1 | 0.0036 | -1.32 | Normal down vs > 5 Years Off IS Tolerant |
| 204092_PM_s_at  | AURKA    | aurora kinase A                                                           | 0.0036 | -1.38 | Normal down vs > 5 Years Off IS Tolerant |
| 205876_PM_at    | LIFR     | leukemia inhibitory factor receptor alpha                                 | 0.0036 | -1.24 | Normal down vs > 5 Years Off IS Tolerant |
| 228326_PM_at    | WDR27    | WD repeat domain 27                                                       | 0.0036 | 1.65  | Normal up vs > 5 Years Off IS Tolerant   |
| 236804_PM_at    | ---      | ---                                                                       | 0.0036 | -1.38 | Normal down vs > 5 Years Off IS Tolerant |
| 1568593_PM_a_at | NUDT16P1 | nudix (nucleoside diphosphate linked moiety X)-type motif 16 pseudogene 1 | 0.0036 | -1.81 | Normal down vs > 5 Years Off IS Tolerant |
| 230810_PM_at    | JMJD4    | jumonji domain containing 4                                               | 0.0036 | -1.29 | Normal down vs > 5 Years Off IS Tolerant |

|                 |                       |                                                                                         |        |       |                                          |
|-----------------|-----------------------|-----------------------------------------------------------------------------------------|--------|-------|------------------------------------------|
| 221752_PM_at    | SSH1                  | slingshot homolog 1 (Drosophila)                                                        | 0.0036 | 1.83  | Normal up vs > 5 Years Off IS Tolerant   |
| 227682_PM_at    | ---                   | ---                                                                                     | 0.0036 | 1.82  | Normal up vs > 5 Years Off IS Tolerant   |
| 237239_PM_at    | ---                   | ---                                                                                     | 0.0036 | 1.57  | Normal up vs > 5 Years Off IS Tolerant   |
| 218880_PM_at    | FOSL2                 | FOS-like antigen 2                                                                      | 0.0036 | 3.69  | Normal up vs > 5 Years Off IS Tolerant   |
| 232311_PM_at    | B2M                   | Beta-2-microglobulin                                                                    | 0.0036 | 1.63  | Normal up vs > 5 Years Off IS Tolerant   |
| 230682_PM_x_at  | ABCC3                 | ATP-binding cassette, sub-family C (CFTR/MRP), member 3                                 | 0.0036 | -1.64 | Normal down vs > 5 Years Off IS Tolerant |
| 233128_PM_at    | ---                   | ---                                                                                     | 0.0036 | -1.27 | Normal down vs > 5 Years Off IS Tolerant |
| 208105_PM_at    | GIPR                  | gastric inhibitory polypeptide receptor                                                 | 0.0036 | -1.35 | Normal down vs > 5 Years Off IS Tolerant |
| 1570298_PM_at   | ---                   | ---                                                                                     | 0.0036 | -1.44 | Normal down vs > 5 Years Off IS Tolerant |
| 227970_PM_at    | GPR157                | G protein-coupled receptor 157                                                          | 0.0036 | 1.51  | Normal up vs > 5 Years Off IS Tolerant   |
| 209867_PM_s_at  | LPHN3                 | latrophilin 3                                                                           | 0.0036 | -1.55 | Normal down vs > 5 Years Off IS Tolerant |
| 1556086_PM_at   | C4orf27               | chromosome 4 open reading frame 27                                                      | 0.0036 | -1.31 | Normal down vs > 5 Years Off IS Tolerant |
| 204067_PM_at    | SUOX                  | sulfite oxidase                                                                         | 0.0036 | -1.56 | Normal down vs > 5 Years Off IS Tolerant |
| 200817_PM_x_at  | RPS10                 | ribosomal protein S10                                                                   | 0.0036 | 1.18  | Normal up vs > 5 Years Off IS Tolerant   |
| 235858_PM_at    | CREBBP                | CREB binding protein                                                                    | 0.0036 | -1.40 | Normal down vs > 5 Years Off IS Tolerant |
| 210423_PM_s_at  | SLC11A1               | solute carrier family 11 (proton-coupled divalent metal ion transporters), member 1     | 0.0036 | -1.72 | Normal down vs > 5 Years Off IS Tolerant |
| 202576_PM_s_at  | DDX19A ///<br>DDX19B  | DEAD (Asp-Glu-Ala-As) box polypeptide 19A /// DEAD (Asp-Glu-Ala-As) box polypeptide 19B | 0.0036 | 1.44  | Normal up vs > 5 Years Off IS Tolerant   |
| 208307_PM_at    | RBMY1A1 ///<br>RBMY1D | RNA binding motif protein, Y-linked, family 1, member A1 /// RNA binding motif protein, | 0.0036 | -2.32 | Normal down vs > 5 Years Off IS Tolerant |
| 224842_PM_at    | SMG1                  | SMG1 homolog, phosphatidylinositol 3-kinase-related kinase (C. elegans)                 | 0.0036 | 1.37  | Normal up vs > 5 Years Off IS Tolerant   |
| 229353_PM_s_at  | NUCKS1                | nuclear casein kinase and cyclin-dependent kinase substrate 1                           | 0.0036 | 1.28  | Normal up vs > 5 Years Off IS Tolerant   |
| 1555351_PM_s_at | PPHLN1                | periphilin 1                                                                            | 0.0036 | 1.47  | Normal up vs > 5 Years Off IS Tolerant   |
| 241826_PM_x_at  | ZNF738                | zinc finger protein 738                                                                 | 0.0036 | -1.31 | Normal down vs > 5 Years Off IS Tolerant |
| 206881_PM_s_at  | LILRA3                | leukocyte immunoglobulin-like receptor, subfamily A (without TM domain), member 3       | 0.0036 | -2.86 | Normal down vs > 5 Years Off IS Tolerant |
| 222082_PM_at    | ZBTB7A                | zinc finger and BTB domain containing 7A                                                | 0.0036 | 1.68  | Normal up vs > 5 Years Off IS Tolerant   |

|                 |                     |                                                                                    |        |       |                                          |
|-----------------|---------------------|------------------------------------------------------------------------------------|--------|-------|------------------------------------------|
| 215948_PM_x_at  | ZMYM5               | zinc finger, MYM-type 5                                                            | 0.0036 | 1.73  | Normal up vs > 5 Years Off IS Tolerant   |
| 221691_PM_x_at  | NPM1                | nucleophosmin (nucleolar phosphoprotein B23, numatrin)                             | 0.0036 | 1.35  | Normal up vs > 5 Years Off IS Tolerant   |
| 1555111_PM_at   | C1orf114            | chromosome 1 open reading frame 114                                                | 0.0036 | -1.26 | Normal down vs > 5 Years Off IS Tolerant |
| 232463_PM_at    | NCRNA00107          | non-protein coding RNA 107                                                         | 0.0036 | 1.48  | Normal up vs > 5 Years Off IS Tolerant   |
| 213074_PM_at    | PHIP                | pleckstrin homology domain interacting protein                                     | 0.0036 | 1.24  | Normal up vs > 5 Years Off IS Tolerant   |
| 240359_PM_at    | C20orf71            | chromosome 20 open reading frame 71                                                | 0.0036 | -1.27 | Normal down vs > 5 Years Off IS Tolerant |
| 211034_PM_s_at  | C12orf51            | chromosome 12 open reading frame 51                                                | 0.0036 | 1.46  | Normal up vs > 5 Years Off IS Tolerant   |
| 1560278_PM_at   | LOC221122           | hypothetical LOC221122                                                             | 0.0036 | -1.62 | Normal down vs > 5 Years Off IS Tolerant |
| 223043_PM_at    | TMEM85              | transmembrane protein 85                                                           | 0.0036 | 1.48  | Normal up vs > 5 Years Off IS Tolerant   |
| 1563854_PM_s_at | LOC283045           | hypothetical protein LOC283045                                                     | 0.0036 | -1.51 | Normal down vs > 5 Years Off IS Tolerant |
| 233010_PM_at    | ---                 | ---                                                                                | 0.0036 | -1.45 | Normal down vs > 5 Years Off IS Tolerant |
| 1557833_PM_at   | ---                 | ---                                                                                | 0.0036 | -1.92 | Normal down vs > 5 Years Off IS Tolerant |
| 227494_PM_at    | LOC253842 /// NR6A1 | hypothetical protein LOC253842 /// nuclear receptor subfamily 6, group A, member 1 | 0.0036 | -1.48 | Normal down vs > 5 Years Off IS Tolerant |
| 238070_PM_at    | ---                 | ---                                                                                | 0.0036 | 1.59  | Normal up vs > 5 Years Off IS Tolerant   |
| 205374_PM_at    | SLN                 | sarcolipin                                                                         | 0.0036 | -1.21 | Normal down vs > 5 Years Off IS Tolerant |
| 219686_PM_at    | STK32B              | serine/threonine kinase 32B                                                        | 0.0036 | -1.32 | Normal down vs > 5 Years Off IS Tolerant |
| 200074_PM_s_at  | RPL14               | ribosomal protein L14                                                              | 0.0036 | 1.26  | Normal up vs > 5 Years Off IS Tolerant   |
| 205859_PM_at    | LY86                | lymphocyte antigen 86                                                              | 0.0037 | -1.56 | Normal down vs > 5 Years Off IS Tolerant |
| 1554155_PM_at   | MCPH1               | microcephalin 1                                                                    | 0.0037 | 1.88  | Normal up vs > 5 Years Off IS Tolerant   |
| 219624_PM_at    | BAG4                | BCL2-associated athanogene 4                                                       | 0.0037 | 2.03  | Normal up vs > 5 Years Off IS Tolerant   |
| 218888_PM_s_at  | NETO2               | neuropilin (NRP) and tolloid (TLL)-like 2                                          | 0.0037 | -1.58 | Normal down vs > 5 Years Off IS Tolerant |
| 235501_PM_at    | ---                 | ---                                                                                | 0.0037 | -1.48 | Normal down vs > 5 Years Off IS Tolerant |
| 223190_PM_s_at  | MLL5                | myeloid/lymphoid or mixed-lineage leukemia 5 (trithorax homolog, Drosophila)       | 0.0037 | 1.28  | Normal up vs > 5 Years Off IS Tolerant   |
| 203114_PM_at    | SSSCA1              | Sjogren syndrome/scleroderma autoantigen 1                                         | 0.0037 | 1.47  | Normal up vs > 5 Years Off IS Tolerant   |
| 217347_PM_at    | ---                 | ---                                                                                | 0.0037 | 1.30  | Normal up vs > 5 Years Off IS Tolerant   |

|                 |                 |                                                                     |        |       |                                          |
|-----------------|-----------------|---------------------------------------------------------------------|--------|-------|------------------------------------------|
| 229424_PM_s_at  | LOC100288194    | Hypothetical protein LOC100288194                                   | 0.0037 | -1.27 | Normal down vs > 5 Years Off IS Tolerant |
| 216235_PM_s_at  | EDNRA           | endothelin receptor type A                                          | 0.0037 | -1.31 | Normal down vs > 5 Years Off IS Tolerant |
| 228784_PM_at    | ST3GAL2         | ST3 beta-galactoside alpha-2,3-sialyltransferase 2                  | 0.0037 | -1.35 | Normal down vs > 5 Years Off IS Tolerant |
| 1566766_PM_a_at | MACC1           | metastasis associated in colon cancer 1                             | 0.0037 | -1.88 | Normal down vs > 5 Years Off IS Tolerant |
| 243095_PM_at    | ---             | ---                                                                 | 0.0037 | -1.29 | Normal down vs > 5 Years Off IS Tolerant |
| 204587_PM_at    | SLC25A14        | solute carrier family 25 (mitochondrial carrier, brain), member 14  | 0.0037 | 1.35  | Normal up vs > 5 Years Off IS Tolerant   |
| 1560901_PM_at   | LOC728789       | Hypothetical LOC728789                                              | 0.0037 | -1.27 | Normal down vs > 5 Years Off IS Tolerant |
| 215126_PM_at    | ---             | ---                                                                 | 0.0037 | -1.61 | Normal down vs > 5 Years Off IS Tolerant |
| 1556917_PM_a_at | ---             | ---                                                                 | 0.0037 | -1.23 | Normal down vs > 5 Years Off IS Tolerant |
| 225435_PM_at    | SSR1            | signal sequence receptor, alpha                                     | 0.0037 | 1.76  | Normal up vs > 5 Years Off IS Tolerant   |
| 1555374_PM_at   | ---             | ---                                                                 | 0.0037 | -1.44 | Normal down vs > 5 Years Off IS Tolerant |
| AFFX-BioC-3_at  | ---             | ---                                                                 | 0.0037 | -2.13 | Normal down vs > 5 Years Off IS Tolerant |
| 243373_PM_at    | ---             | ---                                                                 | 0.0037 | -1.42 | Normal down vs > 5 Years Off IS Tolerant |
| 211796_PM_s_at  | TRBC1 /// TRBC2 | T cell receptor beta constant 1 /// T cell receptor beta constant 2 | 0.0037 | 2.13  | Normal up vs > 5 Years Off IS Tolerant   |
| 1556486_PM_at   | LOC100288618    | Hypothetical protein LOC100288618                                   | 0.0037 | -1.37 | Normal down vs > 5 Years Off IS Tolerant |
| 396_PM_f_at     | EPOR            | erythropoietin receptor                                             | 0.0037 | -1.92 | Normal down vs > 5 Years Off IS Tolerant |
| 225648_PM_at    | STK35           | serine/threonine kinase 35                                          | 0.0037 | 1.50  | Normal up vs > 5 Years Off IS Tolerant   |
| 203209_PM_at    | RFC5            | replication factor C (activator 1) 5, 36.5kDa                       | 0.0037 | 1.64  | Normal up vs > 5 Years Off IS Tolerant   |
| 203822_PM_s_at  | ELF2            | E74-like factor 2 (ets domain transcription factor)                 | 0.0037 | 1.27  | Normal up vs > 5 Years Off IS Tolerant   |
| 1552729_PM_at   | SNHG7           | small nucleolar RNA host gene 7 (non-protein coding)                | 0.0037 | 1.99  | Normal up vs > 5 Years Off IS Tolerant   |
| 217348_PM_x_at  | ARHGEF15        | Rho guanine nucleotide exchange factor (GEF) 15                     | 0.0037 | -1.46 | Normal down vs > 5 Years Off IS Tolerant |
| 1566967_PM_at   | ---             | ---                                                                 | 0.0037 | -1.33 | Normal down vs > 5 Years Off IS Tolerant |

|                 |                        |                                                                           |        |       |                                          |
|-----------------|------------------------|---------------------------------------------------------------------------|--------|-------|------------------------------------------|
| 208253_PM_at    | SIGLEC8                | sialic acid binding Ig-like lectin 8                                      | 0.0037 | -1.31 | Normal down vs > 5 Years Off IS Tolerant |
| 1560977_PM_a_at | BCL2L13                | BCL2-like 13 (apoptosis facilitator)                                      | 0.0037 | -1.82 | Normal down vs > 5 Years Off IS Tolerant |
| 1563498_PM_s_at | SLC25A45               | solute carrier family 25, member 45                                       | 0.0037 | 1.74  | Normal up vs > 5 Years Off IS Tolerant   |
| 207575_PM_at    | GOLGA6A ///<br>GOLGA6C | golgin A6 family, member A /// golgin A6 family,<br>member C              | 0.0037 | -1.49 | Normal down vs > 5 Years Off IS Tolerant |
| 226482_PM_s_at  | TSTD1                  | thiosulfate sulfurtransferase (rhodanese)-like domain<br>containing 1     | 0.0037 | 1.73  | Normal up vs > 5 Years Off IS Tolerant   |
| 207914_PM_x_at  | EVX1                   | even-skipped homeobox 1                                                   | 0.0037 | -1.34 | Normal down vs > 5 Years Off IS Tolerant |
| 213744_PM_at    | ATRNL1                 | attractin-like 1                                                          | 0.0037 | -1.47 | Normal down vs > 5 Years Off IS Tolerant |
| 227189_PM_at    | CPNE5                  | copine V                                                                  | 0.0037 | 1.61  | Normal up vs > 5 Years Off IS Tolerant   |
| 206006_PM_s_at  | KIAA1009               | KIAA1009                                                                  | 0.0037 | -1.53 | Normal down vs > 5 Years Off IS Tolerant |
| 1554441_PM_a_at | WAPAL                  | wings apart-like homolog (Drosophila)                                     | 0.0037 | 1.64  | Normal up vs > 5 Years Off IS Tolerant   |
| 233863_PM_at    | CASZ1                  | castor zinc finger 1                                                      | 0.0037 | 1.43  | Normal up vs > 5 Years Off IS Tolerant   |
| 233921_PM_s_at  | ---                    | ---                                                                       | 0.0037 | 2.07  | Normal up vs > 5 Years Off IS Tolerant   |
| 225155_PM_at    | SNHG5                  | small nucleolar RNA host gene 5 (non-protein coding)                      | 0.0037 | 2.06  | Normal up vs > 5 Years Off IS Tolerant   |
| 214359_PM_s_at  | HSP90AB1               | heat shock protein 90kDa alpha (cytosolic), class B<br>member 1           | 0.0037 | 1.68  | Normal up vs > 5 Years Off IS Tolerant   |
| 1566994_PM_at   | ---                    | ---                                                                       | 0.0037 | -1.95 | Normal down vs > 5 Years Off IS Tolerant |
| 238576_PM_at    | MOCOS                  | molybdenum cofactor sulfurase                                             | 0.0038 | -1.38 | Normal down vs > 5 Years Off IS Tolerant |
| 206469_PM_x_at  | AKR7A3                 | aldo-keto reductase family 7, member A3 (aflatoxin<br>aldehyde reductase) | 0.0038 | 1.31  | Normal up vs > 5 Years Off IS Tolerant   |
| 37145_PM_at     | GNLY                   | granulysin                                                                | 0.0038 | 2.65  | Normal up vs > 5 Years Off IS Tolerant   |
| 213593_PM_s_at  | TRA2A                  | transformer 2 alpha homolog (Drosophila)                                  | 0.0038 | 1.63  | Normal up vs > 5 Years Off IS Tolerant   |
| 208278_PM_s_at  | ---                    | ---                                                                       | 0.0038 | -1.38 | Normal down vs > 5 Years Off IS Tolerant |
| 1554697_PM_at   | ADAMTS9                | ADAM metallopeptidase with thrombospondin type 1<br>motif, 9              | 0.0038 | -1.32 | Normal down vs > 5 Years Off IS Tolerant |
| 210739_PM_x_at  | SLC4A4                 | solute carrier family 4, sodium bicarbonate<br>cotransporter, member 4    | 0.0038 | -3.58 | Normal down vs > 5 Years Off IS Tolerant |
| 225608_PM_at    | SNX29                  | sorting nexin 29                                                          | 0.0038 | 1.45  | Normal up vs > 5 Years Off IS Tolerant   |
| 1555544_PM_a_at | CADM2                  | cell adhesion molecule 2                                                  | 0.0038 | -1.32 | Normal down vs > 5 Years Off IS Tolerant |

|                |                 |                                                                                         |        |       |                                          |
|----------------|-----------------|-----------------------------------------------------------------------------------------|--------|-------|------------------------------------------|
| 218333_PM_at   | DERL2           | Der1-like domain family, member 2                                                       | 0.0038 | 1.41  | Normal up vs > 5 Years Off IS Tolerant   |
| 211608_PM_at   | ---             | ---                                                                                     | 0.0038 | 1.52  | Normal up vs > 5 Years Off IS Tolerant   |
| 215028_PM_at   | SEMA6A          | sema domain, transmembrane domain (TM), and cytoplasmic domain, (semaphorin) 6A         | 0.0038 | -1.29 | Normal down vs > 5 Years Off IS Tolerant |
| 205864_PM_at   | SLC7A4          | solute carrier family 7 (cationic amino acid transporter, y+ system), member 4          | 0.0038 | -1.27 | Normal down vs > 5 Years Off IS Tolerant |
| 235356_PM_at   | NHLRC2          | NHL repeat containing 2                                                                 | 0.0038 | -1.40 | Normal down vs > 5 Years Off IS Tolerant |
| 221403_PM_s_at | INSL6           | insulin-like 6                                                                          | 0.0038 | -1.29 | Normal down vs > 5 Years Off IS Tolerant |
| 224007_PM_at   | HSFY1 /// HSFY2 | heat shock transcription factor, Y-linked 1 /// heat shock transcription factor, Y link | 0.0038 | -1.75 | Normal down vs > 5 Years Off IS Tolerant |
| 41047_PM_at    | C9orf16         | chromosome 9 open reading frame 16                                                      | 0.0038 | 1.61  | Normal up vs > 5 Years Off IS Tolerant   |
| 202742_PM_s_at | PRKACB          | protein kinase, cAMP-dependent, catalytic, beta                                         | 0.0038 | 1.94  | Normal up vs > 5 Years Off IS Tolerant   |
| 1561883_PM_at  | ---             | ---                                                                                     | 0.0038 | -1.33 | Normal down vs > 5 Years Off IS Tolerant |
| 218923_PM_at   | CTBS            | chitinase, di-N-acetyl-                                                                 | 0.0038 | 1.67  | Normal up vs > 5 Years Off IS Tolerant   |
| 217807_PM_s_at | GLTSCR2         | glioma tumor suppressor candidate region gene 2                                         | 0.0038 | 1.22  | Normal up vs > 5 Years Off IS Tolerant   |
| 228337_PM_at   | PWWP2A          | PWWP domain containing 2A                                                               | 0.0038 | -1.60 | Normal down vs > 5 Years Off IS Tolerant |
| 34846_PM_at    | CAMK2B          | calcium/calmodulin-dependent protein kinase II beta                                     | 0.0038 | -1.34 | Normal down vs > 5 Years Off IS Tolerant |
| 202073_PM_at   | OPTN            | optineurin                                                                              | 0.0038 | 2.18  | Normal up vs > 5 Years Off IS Tolerant   |
| 1553118_PM_at  | THEM4           | thioesterase superfamily member 4                                                       | 0.0038 | 2.32  | Normal up vs > 5 Years Off IS Tolerant   |
| 225368_PM_at   | HIPK2           | homeodomain interacting protein kinase 2                                                | 0.0038 | 1.48  | Normal up vs > 5 Years Off IS Tolerant   |
| 237479_PM_at   | ---             | ---                                                                                     | 0.0038 | -1.96 | Normal down vs > 5 Years Off IS Tolerant |
| 236704_PM_at   | LOC100505971    | hypothetical LOC100505971                                                               | 0.0038 | 1.64  | Normal up vs > 5 Years Off IS Tolerant   |
| 221700_PM_s_at | UBA52           | ubiquitin A-52 residue ribosomal protein fusion product 1                               | 0.0038 | 1.16  | Normal up vs > 5 Years Off IS Tolerant   |
| 226822_PM_at   | STOX2           | storkhead box 2                                                                         | 0.0038 | -1.39 | Normal down vs > 5 Years Off IS Tolerant |
| 204956_PM_at   | MTAP            | methylthioadenosine phosphorylase                                                       | 0.0038 | -1.41 | Normal down vs > 5 Years Off IS Tolerant |
| 228122_PM_at   | CCDC66          | coiled-coil domain containing 66                                                        | 0.0038 | 1.89  | Normal up vs > 5 Years Off IS Tolerant   |
| 226796_PM_at   | ABHD15          | abhydrolase domain containing 15                                                        | 0.0038 | 2.03  | Normal up vs > 5 Years Off IS Tolerant   |
| 202882_PM_x_at | NOL7            | nucleolar protein 7, 27kDa                                                              | 0.0038 | 1.27  | Normal up vs > 5 Years Off IS Tolerant   |
| 212138_PM_at   | PDS5A           | PDS5, regulator of cohesion maintenance, homolog A (S. cerevisiae)                      | 0.0038 | 1.31  | Normal up vs > 5 Years Off IS Tolerant   |

|                 |           |                                                        |        |       |                                          |
|-----------------|-----------|--------------------------------------------------------|--------|-------|------------------------------------------|
| 214630_PM_at    | CYP11B2   | cytochrome P450, family 11, subfamily B, polypeptide 2 | 0.0038 | -1.42 | Normal down vs > 5 Years Off IS Tolerant |
| 202539_PM_s_at  | HMGCR     | 3-hydroxy-3-methylglutaryl-CoA reductase               | 0.0038 | 1.77  | Normal up vs > 5 Years Off IS Tolerant   |
| 217389_PM_s_at  | ATF5      | activating transcription factor 5                      | 0.0038 | -1.62 | Normal down vs > 5 Years Off IS Tolerant |
| 207196_PM_s_at  | TNIP1     | TNFAIP3 interacting protein 1                          | 0.0038 | 1.41  | Normal up vs > 5 Years Off IS Tolerant   |
| 205182_PM_s_at  | ZNF324    | zinc finger protein 324                                | 0.0038 | 1.61  | Normal up vs > 5 Years Off IS Tolerant   |
| 1567167_PM_at   | ---       | ---                                                    | 0.0038 | -1.26 | Normal down vs > 5 Years Off IS Tolerant |
| 208826_PM_x_at  | HINT1     | histidine triad nucleotide binding protein 1           | 0.0038 | 1.41  | Normal up vs > 5 Years Off IS Tolerant   |
| 227493_PM_s_at  | KIAA1143  | KIAA1143                                               | 0.0038 | 1.48  | Normal up vs > 5 Years Off IS Tolerant   |
| 207015_PM_s_at  | ALDH1A2   | aldehyde dehydrogenase 1 family, member A2             | 0.0038 | -1.32 | Normal down vs > 5 Years Off IS Tolerant |
| 238619_PM_at    | ---       | ---                                                    | 0.0038 | 2.02  | Normal up vs > 5 Years Off IS Tolerant   |
| 1554712_PM_a_at | GLYATL2   | glycine-N-acyltransferase-like 2                       | 0.0039 | -1.48 | Normal down vs > 5 Years Off IS Tolerant |
| 1553849_PM_at   | CCDC26    | coiled-coil domain containing 26                       | 0.0039 | -1.54 | Normal down vs > 5 Years Off IS Tolerant |
| 213102_PM_at    | ACTR3     | ARP3 actin-related protein 3 homolog (yeast)           | 0.0039 | -1.44 | Normal down vs > 5 Years Off IS Tolerant |
| 203136_PM_at    | RABAC1    | Rab acceptor 1 (prenylated)                            | 0.0039 | 1.56  | Normal up vs > 5 Years Off IS Tolerant   |
| 1552395_PM_at   | TSSK3     | testis-specific serine kinase 3                        | 0.0039 | -1.43 | Normal down vs > 5 Years Off IS Tolerant |
| 209913_PM_x_at  | KIAA0415  | KIAA0415                                               | 0.0039 | -1.78 | Normal down vs > 5 Years Off IS Tolerant |
| 1555793_PM_a_at | ZFP82     | zinc finger protein 82 homolog (mouse)                 | 0.0039 | 1.53  | Normal up vs > 5 Years Off IS Tolerant   |
| 1558183_PM_at   | ZNF17     | zinc finger protein 17                                 | 0.0039 | -1.29 | Normal down vs > 5 Years Off IS Tolerant |
| 1555673_PM_at   | LOC730755 | keratin associated protein 2-4-like                    | 0.0039 | -1.34 | Normal down vs > 5 Years Off IS Tolerant |
| 1569764_PM_at   | ---       | ---                                                    | 0.0039 | -1.48 | Normal down vs > 5 Years Off IS Tolerant |
| 1552620_PM_at   | SPRR4     | small proline-rich protein 4                           | 0.0039 | -1.72 | Normal down vs > 5 Years Off IS Tolerant |
| 1556737_PM_at   | LOC388387 | hypothetical LOC388387                                 | 0.0039 | -1.30 | Normal down vs > 5 Years Off IS Tolerant |
| 223431_PM_at    | CNO       | cappuccino homolog (mouse)                             | 0.0039 | 1.70  | Normal up vs > 5 Years Off IS Tolerant   |
| 201665_PM_x_at  | RPS17     | ribosomal protein S17                                  | 0.0039 | 1.20  | Normal up vs > 5 Years Off IS Tolerant   |

|                 |           |                                                                        |        |       |                                          |
|-----------------|-----------|------------------------------------------------------------------------|--------|-------|------------------------------------------|
| 204811_PM_s_at  | CACNA2D2  | calcium channel, voltage-dependent, alpha 2/delta subunit 2            | 0.0039 | 2.12  | Normal up vs > 5 Years Off IS Tolerant   |
| 229121_PM_at    | CMKLR1    | chemokine-like receptor 1                                              | 0.0039 | -1.79 | Normal down vs > 5 Years Off IS Tolerant |
| 200712_PM_s_at  | MAPRE1    | microtubule-associated protein, RP/EB family, member 1                 | 0.0039 | 1.74  | Normal up vs > 5 Years Off IS Tolerant   |
| 224321_PM_at    | TMEFF2    | transmembrane protein with EGF-like and two follistatin-like domains 2 | 0.0039 | -3.12 | Normal down vs > 5 Years Off IS Tolerant |
| 222956_PM_at    | FIGN      | fidgetin                                                               | 0.0039 | -1.33 | Normal down vs > 5 Years Off IS Tolerant |
| 1569250_PM_at   | ZNF333    | zinc finger protein 333                                                | 0.0039 | -1.40 | Normal down vs > 5 Years Off IS Tolerant |
| 220328_PM_at    | PHC3      | polyhomeotic homolog 3 (Drosophila)                                    | 0.0039 | 1.74  | Normal up vs > 5 Years Off IS Tolerant   |
| 214975_PM_s_at  | MTMR1     | myotubularin related protein 1                                         | 0.0039 | 1.44  | Normal up vs > 5 Years Off IS Tolerant   |
| 1561384_PM_a_at | LOC284661 | hypothetical LOC284661                                                 | 0.0039 | -1.25 | Normal down vs > 5 Years Off IS Tolerant |
| 211000_PM_s_at  | IL6ST     | interleukin 6 signal transducer (gp130, oncostatin M receptor)         | 0.0039 | 2.10  | Normal up vs > 5 Years Off IS Tolerant   |
| 241088_PM_at    | ---       | ---                                                                    | 0.0039 | -1.30 | Normal down vs > 5 Years Off IS Tolerant |
| 203717_PM_at    | DPP4      | dipeptidyl-peptidase 4                                                 | 0.0039 | 2.21  | Normal up vs > 5 Years Off IS Tolerant   |
| 207893_PM_at    | SRY       | sex determining region Y                                               | 0.0039 | -1.31 | Normal down vs > 5 Years Off IS Tolerant |
| 242512_PM_at    | MYO9A     | myosin IXA                                                             | 0.0039 | -2.16 | Normal down vs > 5 Years Off IS Tolerant |
| 218058_PM_at    | CXXC1     | CXXC finger protein 1                                                  | 0.0039 | 1.55  | Normal up vs > 5 Years Off IS Tolerant   |
| 206503_PM_x_at  | PML       | promyelocytic leukemia                                                 | 0.0039 | -1.46 | Normal down vs > 5 Years Off IS Tolerant |
| 210476_PM_s_at  | PRLR      | prolactin receptor                                                     | 0.0039 | -1.38 | Normal down vs > 5 Years Off IS Tolerant |
| 242419_PM_at    | ---       | ---                                                                    | 0.0039 | -1.97 | Normal down vs > 5 Years Off IS Tolerant |
| 203812_PM_at    | SLIT3     | slit homolog 3 (Drosophila)                                            | 0.0039 | -1.46 | Normal down vs > 5 Years Off IS Tolerant |
| 1564323_PM_at   | ---       | ---                                                                    | 0.0039 | -1.38 | Normal down vs > 5 Years Off IS Tolerant |
| 227584_PM_at    | NAV1      | neuron navigator 1                                                     | 0.0039 | -1.47 | Normal down vs > 5 Years Off IS Tolerant |



|                |                      |                                                                                           |        |       |                                          |
|----------------|----------------------|-------------------------------------------------------------------------------------------|--------|-------|------------------------------------------|
| 1564807_PM_at  | LOC100288320         | Hypothetical protein LOC100288320                                                         | 0.0039 | -1.44 | Normal down vs > 5 Years Off IS Tolerant |
| 215222_PM_x_at | MACF1                | microtubule-actin crosslinking factor 1                                                   | 0.0039 | 1.36  | Normal up vs > 5 Years Off IS Tolerant   |
| 229593_PM_at   | ---                  | ---                                                                                       | 0.0039 | -1.62 | Normal down vs > 5 Years Off IS Tolerant |
| 212243_PM_at   | GCOM1 ///<br>GRINL1A | GRINL1A complex locus /// glutamate receptor,<br>ionotropic, N-methyl D-aspartate-like 1A | 0.0039 | 1.54  | Normal up vs > 5 Years Off IS Tolerant   |
| 231672_PM_at   | ---                  | ---                                                                                       | 0.0039 | -1.31 | Normal down vs > 5 Years Off IS Tolerant |
| 235081_PM_x_at | TRIM65               | tripartite motif-containing 65                                                            | 0.0039 | -1.50 | Normal down vs > 5 Years Off IS Tolerant |
| 201853_PM_s_at | CDC25B               | cell division cycle 25 homolog B ( <i>S. pombe</i> )                                      | 0.0039 | 1.63  | Normal up vs > 5 Years Off IS Tolerant   |
| 233613_PM_x_at | REXO2                | REX2, RNA exonuclease 2 homolog ( <i>S. cerevisiae</i> )                                  | 0.0040 | 1.47  | Normal up vs > 5 Years Off IS Tolerant   |
| 231254_PM_at   | LOC100507635         | hypothetical LOC100507635                                                                 | 0.0040 | -1.42 | Normal down vs > 5 Years Off IS Tolerant |
| 229871_PM_at   | SAMD4B               | Sterile alpha motif domain containing 4B                                                  | 0.0040 | 1.82  | Normal up vs > 5 Years Off IS Tolerant   |
| 38241_PM_at    | BTN3A3               | butyrophilin, subfamily 3, member A3                                                      | 0.0040 | 1.79  | Normal up vs > 5 Years Off IS Tolerant   |
| 221132_PM_at   | CLDN18               | claudin 18                                                                                | 0.0040 | -1.29 | Normal down vs > 5 Years Off IS Tolerant |
| 1552743_PM_at  | MCF2L                | MCF.2 cell line derived transforming sequence-like                                        | 0.0040 | -1.34 | Normal down vs > 5 Years Off IS Tolerant |
| 57532_PM_at    | DVL2                 | dishevelled, dsh homolog 2 ( <i>Drosophila</i> )                                          | 0.0040 | 1.52  | Normal up vs > 5 Years Off IS Tolerant   |
| 204842_PM_x_at | PRKAR2A              | protein kinase, cAMP-dependent, regulatory, type II,<br>alpha                             | 0.0040 | -1.43 | Normal down vs > 5 Years Off IS Tolerant |
| 240534_PM_at   | LOC100505805         | hypothetical LOC100505805                                                                 | 0.0040 | -1.26 | Normal down vs > 5 Years Off IS Tolerant |
| 244281_PM_at   | REXO1                | REX1, RNA exonuclease 1 homolog ( <i>S. cerevisiae</i> )                                  | 0.0040 | -1.34 | Normal down vs > 5 Years Off IS Tolerant |
| 224480_PM_s_at | AGPAT9               | 1-acylglycerol-3-phosphate O-acyltransferase 9                                            | 0.0040 | -1.85 | Normal down vs > 5 Years Off IS Tolerant |
| 205426_PM_s_at | HIP1                 | huntingtin interacting protein 1                                                          | 0.0040 | -1.33 | Normal down vs > 5 Years Off IS Tolerant |
| 222735_PM_at   | TMEM38B              | transmembrane protein 38B                                                                 | 0.0040 | 1.60  | Normal up vs > 5 Years Off IS Tolerant   |
| 236616_PM_at   | ---                  | ---                                                                                       | 0.0040 | 1.62  | Normal up vs > 5 Years Off IS Tolerant   |
| 234193_PM_at   | ---                  | ---                                                                                       | 0.0040 | -1.82 | Normal down vs > 5 Years Off IS Tolerant |
| 206927_PM_s_at | GUCY1A2              | guanylate cyclase 1, soluble, alpha 2                                                     | 0.0040 | -1.27 | Normal down vs > 5 Years Off IS Tolerant |
| 226548_PM_at   | SBK1                 | SH3-binding domain kinase 1                                                               | 0.0040 | 1.81  | Normal up vs > 5 Years Off IS Tolerant   |

|                |                               |                                                                                        |        |       |                                          |
|----------------|-------------------------------|----------------------------------------------------------------------------------------|--------|-------|------------------------------------------|
| 204666_PM_s_at | SIKE1                         | suppressor of IKBKE 1                                                                  | 0.0040 | -1.24 | Normal down vs > 5 Years Off IS Tolerant |
| 241354_PM_at   | ASMTL-AS                      | ASMTL antisense RNA (non-protein coding)                                               | 0.0040 | -1.43 | Normal down vs > 5 Years Off IS Tolerant |
| 224619_PM_at   | CASC4                         | cancer susceptibility candidate 4                                                      | 0.0040 | 1.35  | Normal up vs > 5 Years Off IS Tolerant   |
| 243944_PM_at   | ---                           | ---                                                                                    | 0.0040 | -1.36 | Normal down vs > 5 Years Off IS Tolerant |
| 200019_PM_s_at | FAU                           | Finkel-Biskis-Reilly murine sarcoma virus (FBR-MuSV) ubiquitously expressed            | 0.0040 | 1.19  | Normal up vs > 5 Years Off IS Tolerant   |
| 203842_PM_s_at | MAPRE3                        | microtubule-associated protein, RP/EB family, member 3                                 | 0.0040 | -1.42 | Normal down vs > 5 Years Off IS Tolerant |
| 213768_PM_s_at | ASCL1                         | achaete-scute complex homolog 1 (Drosophila)                                           | 0.0040 | -1.21 | Normal down vs > 5 Years Off IS Tolerant |
| 219996_PM_at   | ASB7                          | ankyrin repeat and SOCS box-containing 7                                               | 0.0040 | 1.44  | Normal up vs > 5 Years Off IS Tolerant   |
| 1555973_PM_at  | ---                           | ---                                                                                    | 0.0040 | 1.37  | Normal up vs > 5 Years Off IS Tolerant   |
| 213306_PM_at   | MPDZ                          | multiple PDZ domain protein                                                            | 0.0040 | -3.03 | Normal down vs > 5 Years Off IS Tolerant |
| 216878_PM_x_at | HAB1                          | B1 for mucin                                                                           | 0.0040 | -1.36 | Normal down vs > 5 Years Off IS Tolerant |
| 207697_PM_x_at | LILRB2                        | leukocyte immunoglobulin-like receptor, subfamily B (with TM and ITIM domains), member | 0.0040 | -1.54 | Normal down vs > 5 Years Off IS Tolerant |
| 240167_PM_at   | LOC152742                     | hypothetical LOC152742                                                                 | 0.0040 | -1.38 | Normal down vs > 5 Years Off IS Tolerant |
| 215000_PM_s_at | FEZ2                          | fasciculation and elongation protein zeta 2 (zygin II)                                 | 0.0040 | -1.50 | Normal down vs > 5 Years Off IS Tolerant |
| 212863_PM_x_at | CTBP1                         | C-terminal binding protein 1                                                           | 0.0040 | 1.21  | Normal up vs > 5 Years Off IS Tolerant   |
| 234576_PM_at   | ANPEP                         | Alanyl (membrane) aminopeptidase                                                       | 0.0040 | -1.33 | Normal down vs > 5 Years Off IS Tolerant |
| 222416_PM_at   | ALDH18A1                      | aldehyde dehydrogenase 18 family, member A1                                            | 0.0040 | 1.82  | Normal up vs > 5 Years Off IS Tolerant   |
| 224817_PM_at   | SH3PXD2A                      | SH3 and PX domains 2A                                                                  | 0.0040 | 1.63  | Normal up vs > 5 Years Off IS Tolerant   |
| 1552304_PM_at  | ALG10                         | asparagine-linked glycosylation 10, alpha-1,2-glycosyltransferase homolog (S. pombe)   | 0.0040 | -1.68 | Normal down vs > 5 Years Off IS Tolerant |
| 223538_PM_at   | SERF1A /// SERF1B             | small EDRK-rich factor 1A (telomeric) /// small EDRK-rich factor 1B (centromeric)      | 0.0040 | 1.97  | Normal up vs > 5 Years Off IS Tolerant   |
| 226951_PM_at   | C2orf49                       | chromosome 2 open reading frame 49                                                     | 0.0040 | 1.51  | Normal up vs > 5 Years Off IS Tolerant   |
| 242473_PM_at   | TRAF4                         | TNF receptor-associated factor 4                                                       | 0.0040 | 1.66  | Normal up vs > 5 Years Off IS Tolerant   |
| 238666_PM_at   | ---                           | ---                                                                                    | 0.0040 | 1.81  | Normal up vs > 5 Years Off IS Tolerant   |
| 211050_PM_x_at | LOC100134822 /// LOC100288069 | similar to hCG1739109 /// hypothetical LOC100288069                                    | 0.0040 | -1.55 | Normal down vs > 5 Years Off IS Tolerant |

|                 |              |                                                                                         |        |       |                                          |
|-----------------|--------------|-----------------------------------------------------------------------------------------|--------|-------|------------------------------------------|
| 233730_PM_at    | FAM135A      | family with sequence similarity 135, member A                                           | 0.0041 | -1.24 | Normal down vs > 5 Years Off IS Tolerant |
| 203089_PM_s_at  | HTRA2        | HtrA serine peptidase 2                                                                 | 0.0041 | 1.72  | Normal up vs > 5 Years Off IS Tolerant   |
| 201556_PM_s_at  | VAMP2        | vesicle-associated membrane protein 2 (synaptobrevin 2)                                 | 0.0041 | 1.47  | Normal up vs > 5 Years Off IS Tolerant   |
| 205205_PM_at    | RELB         | v-rel reticuloendotheliosis viral oncogene homolog B                                    | 0.0041 | 2.19  | Normal up vs > 5 Years Off IS Tolerant   |
| 237431_PM_at    | LOC100506882 | hypothetical LOC100506882                                                               | 0.0041 | -1.30 | Normal down vs > 5 Years Off IS Tolerant |
| 229181_PM_s_at  | HAUS2        | HAUS augmin-like complex, subunit 2                                                     | 0.0041 | 1.51  | Normal up vs > 5 Years Off IS Tolerant   |
| 218712_PM_at    | C1orf109     | chromosome 1 open reading frame 109                                                     | 0.0041 | 1.46  | Normal up vs > 5 Years Off IS Tolerant   |
| 204566_PM_at    | PPM1D        | protein phosphatase, Mg2+/Mn2+ dependent, 1D                                            | 0.0041 | 1.73  | Normal up vs > 5 Years Off IS Tolerant   |
| 1556762_PM_a_at | ---          | ---                                                                                     | 0.0041 | 1.30  | Normal up vs > 5 Years Off IS Tolerant   |
| 209953_PM_s_at  | CDC37        | cell division cycle 37 homolog ( <i>S. cerevisiae</i> )                                 | 0.0041 | 1.38  | Normal up vs > 5 Years Off IS Tolerant   |
| 239307_PM_at    | LOC100509703 | hypothetical LOC100509703                                                               | 0.0041 | 1.63  | Normal up vs > 5 Years Off IS Tolerant   |
| 201258_PM_at    | RPS16        | ribosomal protein S16                                                                   | 0.0041 | 1.25  | Normal up vs > 5 Years Off IS Tolerant   |
| 206187_PM_at    | PTGIR        | prostaglandin I2 (prostacyclin) receptor (IP)                                           | 0.0041 | -1.51 | Normal down vs > 5 Years Off IS Tolerant |
| 239959_PM_x_at  | ---          | ---                                                                                     | 0.0041 | -2.70 | Normal down vs > 5 Years Off IS Tolerant |
| 226196_PM_s_at  | C14orf179    | chromosome 14 open reading frame 179                                                    | 0.0041 | 1.47  | Normal up vs > 5 Years Off IS Tolerant   |
| 216256_PM_at    | GRM8         | glutamate receptor, metabotropic 8                                                      | 0.0041 | -1.28 | Normal down vs > 5 Years Off IS Tolerant |
| 212039_PM_x_at  | RPL3         | ribosomal protein L3                                                                    | 0.0041 | 1.21  | Normal up vs > 5 Years Off IS Tolerant   |
| 200693_PM_at    | YWHAQ        | tyrosine 3-monooxygenase/tryptophan 5-monooxygenase activation protein, theta polypepti | 0.0041 | 1.32  | Normal up vs > 5 Years Off IS Tolerant   |
| 200949_PM_x_at  | RPS20        | ribosomal protein S20                                                                   | 0.0041 | 1.26  | Normal up vs > 5 Years Off IS Tolerant   |
| 1553701_PM_a_at | DUSP18       | dual specificity phosphatase 18                                                         | 0.0041 | -1.42 | Normal down vs > 5 Years Off IS Tolerant |
| 238142_PM_at    | ---          | ---                                                                                     | 0.0041 | 1.66  | Normal up vs > 5 Years Off IS Tolerant   |
| 206199_PM_at    | CEACAM7      | carcinoembryonic antigen-related cell adhesion molecule 7                               | 0.0041 | -1.30 | Normal down vs > 5 Years Off IS Tolerant |
| 218784_PM_s_at  | C6orf64      | chromosome 6 open reading frame 64                                                      | 0.0041 | 1.50  | Normal up vs > 5 Years Off IS Tolerant   |
| 1554036_PM_at   | ZBTB24       | zinc finger and BTB domain containing 24                                                | 0.0041 | 2.07  | Normal up vs > 5 Years Off IS Tolerant   |
| 217540_PM_at    | FAM55C       | family with sequence similarity 55, member C                                            | 0.0041 | 1.98  | Normal up vs > 5 Years Off IS Tolerant   |
| 201391_PM_at    | TRAP1        | TNF receptor-associated protein 1                                                       | 0.0041 | 1.43  | Normal up vs > 5 Years Off IS Tolerant   |
| 239703_PM_at    | ---          | ---                                                                                     | 0.0041 | -1.24 | Normal down vs > 5 Years Off IS Tolerant |
| 1556684_PM_at   | RPPH1        | ribonuclease P RNA component H1                                                         | 0.0041 | 1.49  | Normal up vs > 5 Years Off IS Tolerant   |
| 203542_PM_s_at  | KLF9         | Kruppel-like factor 9                                                                   | 0.0041 | 1.81  | Normal up vs > 5 Years Off IS Tolerant   |

|                 |                       |                                                                        |        |       |                                          |
|-----------------|-----------------------|------------------------------------------------------------------------|--------|-------|------------------------------------------|
| 200963_PM_x_at  | RPL31 ///<br>RPL31P11 | ribosomal protein L31 /// ribosomal protein L31<br>pseudogene 11       | 0.0041 | 1.13  | Normal up vs > 5 Years Off IS Tolerant   |
| 212771_PM_at    | FAM171A1              | family with sequence similarity 171, member A1                         | 0.0041 | 1.78  | Normal up vs > 5 Years Off IS Tolerant   |
| 230708_PM_at    | PRICKLE1              | prickle homolog 1 (Drosophila)                                         | 0.0041 | -1.42 | Normal down vs > 5 Years Off IS Tolerant |
| 223911_PM_at    | LOC440330             | hypothetical protein LOC440330                                         | 0.0041 | -1.40 | Normal down vs > 5 Years Off IS Tolerant |
| 1562947_PM_x_at | ---                   | ---                                                                    | 0.0041 | -1.28 | Normal down vs > 5 Years Off IS Tolerant |
| 1561084_PM_at   | ---                   | ---                                                                    | 0.0041 | -1.39 | Normal down vs > 5 Years Off IS Tolerant |
| 209397_PM_at    | ME2                   | malic enzyme 2, NAD(+)-dependent, mitochondrial                        | 0.0041 | -1.48 | Normal down vs > 5 Years Off IS Tolerant |
| 225617_PM_at    | ODF2                  | outer dense fiber of sperm tails 2                                     | 0.0041 | 1.46  | Normal up vs > 5 Years Off IS Tolerant   |
| 233859_PM_at    | C14orf145             | chromosome 14 open reading frame 145                                   | 0.0041 | -1.40 | Normal down vs > 5 Years Off IS Tolerant |
| 203285_PM_s_at  | HS2ST1                | heparan sulfate 2-O-sulfotransferase 1                                 | 0.0041 | 1.77  | Normal up vs > 5 Years Off IS Tolerant   |
| 217208_PM_s_at  | DLG1                  | discs, large homolog 1 (Drosophila)                                    | 0.0041 | 1.92  | Normal up vs > 5 Years Off IS Tolerant   |
| 1553919_PM_at   | C9orf62               | chromosome 9 open reading frame 62                                     | 0.0041 | -1.35 | Normal down vs > 5 Years Off IS Tolerant |
| 241408_PM_at    | CRIPAK                | cysteine-rich PAK1 inhibitor                                           | 0.0041 | 1.48  | Normal up vs > 5 Years Off IS Tolerant   |
| 204591_PM_at    | CHL1                  | cell adhesion molecule with homology to L1CAM (close<br>homolog of L1) | 0.0041 | -1.26 | Normal down vs > 5 Years Off IS Tolerant |
| 206137_PM_at    | RIMS2                 | regulating synaptic membrane exocytosis 2                              | 0.0041 | -1.31 | Normal down vs > 5 Years Off IS Tolerant |
| 235905_PM_at    | ZNF704                | zinc finger protein 704                                                | 0.0041 | -1.36 | Normal down vs > 5 Years Off IS Tolerant |
| 237177_PM_at    | CNTN4                 | contactin 4                                                            | 0.0041 | -1.80 | Normal down vs > 5 Years Off IS Tolerant |
| 1563081_PM_at   | ---                   | ---                                                                    | 0.0041 | -1.34 | Normal down vs > 5 Years Off IS Tolerant |
| 202059_PM_s_at  | KPNA1                 | karyopherin alpha 1 (importin alpha 5)                                 | 0.0041 | 1.50  | Normal up vs > 5 Years Off IS Tolerant   |
| 228225_PM_at    | PEX2                  | peroxisomal biogenesis factor 2                                        | 0.0042 | 1.59  | Normal up vs > 5 Years Off IS Tolerant   |
| 209519_PM_at    | NCBP1                 | nuclear cap binding protein subunit 1, 80kDa                           | 0.0042 | 1.33  | Normal up vs > 5 Years Off IS Tolerant   |
| 209442_PM_x_at  | ANK3                  | ankyrin 3, node of Ranvier (ankyrin G)                                 | 0.0042 | 1.67  | Normal up vs > 5 Years Off IS Tolerant   |
| 200943_PM_at    | HMGN1                 | high-mobility group nucleosome binding domain 1                        | 0.0042 | 1.25  | Normal up vs > 5 Years Off IS Tolerant   |
| 1554148_PM_a_at | SLC33A1               | solute carrier family 33 (acetyl-CoA transporter),<br>member 1         | 0.0042 | -1.50 | Normal down vs > 5 Years Off IS Tolerant |

|                 |                      |                                                                                                |        |       |                                          |
|-----------------|----------------------|------------------------------------------------------------------------------------------------|--------|-------|------------------------------------------|
| 234839_PM_at    | ---                  | ---                                                                                            | 0.0042 | -1.32 | Normal down vs > 5 Years Off IS Tolerant |
| 226647_PM_at    | TMEM25               | transmembrane protein 25                                                                       | 0.0042 | 1.33  | Normal up vs > 5 Years Off IS Tolerant   |
| 219237_PM_s_at  | DNAJB14              | DnaJ (Hsp40) homolog, subfamily B, member 14                                                   | 0.0042 | 1.33  | Normal up vs > 5 Years Off IS Tolerant   |
| 214236_PM_at    | LOC100286895         | Similar to cell division cycle protein 27                                                      | 0.0042 | -1.57 | Normal down vs > 5 Years Off IS Tolerant |
| 232611_PM_at    | GOLGA2B              | golgin A2 family, member B                                                                     | 0.0042 | 1.38  | Normal up vs > 5 Years Off IS Tolerant   |
| 205830_PM_at    | CLGN                 | calmegin                                                                                       | 0.0042 | -2.20 | Normal down vs > 5 Years Off IS Tolerant |
| 207954_PM_at    | GATA2                | GATA binding protein 2                                                                         | 0.0042 | -1.26 | Normal down vs > 5 Years Off IS Tolerant |
| 1557283_PM_a_at | ZNF519               | zinc finger protein 519                                                                        | 0.0042 | -1.70 | Normal down vs > 5 Years Off IS Tolerant |
| 223176_PM_at    | KCTD20               | potassium channel tetramerisation domain containing 20                                         | 0.0042 | 1.86  | Normal up vs > 5 Years Off IS Tolerant   |
| 239052_PM_at    | HNRNPD               | Heterogeneous nuclear ribonucleoprotein D (AU-rich element RNA binding protein 1, 37kDa)       | 0.0042 | -1.45 | Normal down vs > 5 Years Off IS Tolerant |
| 223761_PM_at    | FGF19                | fibroblast growth factor 19                                                                    | 0.0042 | -1.25 | Normal down vs > 5 Years Off IS Tolerant |
| 212439_PM_at    | IP6K1                | inositol hexakisphosphate kinase 1                                                             | 0.0042 | 1.43  | Normal up vs > 5 Years Off IS Tolerant   |
| 1569476_PM_at   | DKFZP434L187         | hypothetical LOC26082                                                                          | 0.0042 | -1.61 | Normal down vs > 5 Years Off IS Tolerant |
| 219577_PM_s_at  | ABCA7                | ATP-binding cassette, sub-family A (ABC1), member 7                                            | 0.0042 | 1.37  | Normal up vs > 5 Years Off IS Tolerant   |
| 221135_PM_s_at  | ASTE1                | asteroid homolog 1 (Drosophila)                                                                | 0.0042 | 1.66  | Normal up vs > 5 Years Off IS Tolerant   |
| 228666_PM_at    | C15orf38             | chromosome 15 open reading frame 38                                                            | 0.0042 | -1.34 | Normal down vs > 5 Years Off IS Tolerant |
| 200000_PM_s_at  | PRPF8                | PRP8 pre-mRNA processing factor 8 homolog (S. cerevisiae)                                      | 0.0042 | 1.33  | Normal up vs > 5 Years Off IS Tolerant   |
| 211364_PM_at    | MTAP                 | methylthioadenosine phosphorylase                                                              | 0.0042 | -1.48 | Normal down vs > 5 Years Off IS Tolerant |
| 207135_PM_at    | HTR2A                | 5-hydroxytryptamine (serotonin) receptor 2A                                                    | 0.0042 | -1.83 | Normal down vs > 5 Years Off IS Tolerant |
| 1556601_PM_a_at | SPATA13              | Spermatogenesis associated 13                                                                  | 0.0042 | 2.04  | Normal up vs > 5 Years Off IS Tolerant   |
| 203713_PM_s_at  | LLGL2                | lethal giant larvae homolog 2 (Drosophila)                                                     | 0.0042 | 1.65  | Normal up vs > 5 Years Off IS Tolerant   |
| 244868_PM_at    | ---                  | ---                                                                                            | 0.0042 | 2.01  | Normal up vs > 5 Years Off IS Tolerant   |
| 58900_PM_at     | UBE2D4               | ubiquitin-conjugating enzyme E2D 4 (putative)                                                  | 0.0042 | -1.51 | Normal down vs > 5 Years Off IS Tolerant |
| 212181_PM_s_at  | NUDT4 ///<br>NUDT4P1 | nudix (nucleoside diphosphate linked moiety X)-type motif 4 /// nudix (nucleoside diphosphate) | 0.0042 | 1.29  | Normal up vs > 5 Years Off IS Tolerant   |

|                 |           |                                                                      |        |       |                                          |
|-----------------|-----------|----------------------------------------------------------------------|--------|-------|------------------------------------------|
| 203025_PM_at    | NAA10     | N(alpha)-acetyltransferase 10, NatA catalytic subunit                | 0.0042 | 1.46  | Normal up vs > 5 Years Off IS Tolerant   |
| 1557049_PM_at   | BTBD19    | BTB (POZ) domain containing 19                                       | 0.0042 | 2.17  | Normal up vs > 5 Years Off IS Tolerant   |
| 214048_PM_at    | MBD4      | methyl-CpG binding domain protein 4                                  | 0.0042 | 1.82  | Normal up vs > 5 Years Off IS Tolerant   |
| 220863_PM_at    | MIP       | major intrinsic protein of lens fiber                                | 0.0042 | -1.26 | Normal down vs > 5 Years Off IS Tolerant |
| 227713_PM_at    | KATNAL1   | katanin p60 subunit A-like 1                                         | 0.0042 | 1.43  | Normal up vs > 5 Years Off IS Tolerant   |
| 201082_PM_s_at  | DCTN1     | dynactin 1                                                           | 0.0042 | -1.44 | Normal down vs > 5 Years Off IS Tolerant |
| 236076_PM_at    | LOC257396 | hypothetical LOC257396                                               | 0.0042 | -1.26 | Normal down vs > 5 Years Off IS Tolerant |
| 200987_PM_x_at  | PSME3     | proteasome (prosome, macropain) activator subunit 3 (PA28 gamma; Ki) | 0.0042 | -1.50 | Normal down vs > 5 Years Off IS Tolerant |
| 208260_PM_at    | AVPR1B    | arginine vasopressin receptor 1B                                     | 0.0043 | -1.56 | Normal down vs > 5 Years Off IS Tolerant |
| 210087_PM_s_at  | MPZL1     | myelin protein zero-like 1                                           | 0.0043 | -1.42 | Normal down vs > 5 Years Off IS Tolerant |
| 227141_PM_at    | TYW3      | tRNA-yW synthesizing protein 3 homolog ( <i>S. cerevisiae</i> )      | 0.0043 | 1.59  | Normal up vs > 5 Years Off IS Tolerant   |
| 1552396_PM_at   | WFDC6     | WAP four-disulfide core domain 6                                     | 0.0043 | -1.25 | Normal down vs > 5 Years Off IS Tolerant |
| 228589_PM_at    | ---       | ---                                                                  | 0.0043 | -1.41 | Normal down vs > 5 Years Off IS Tolerant |
| 1555579_PM_s_at | PTPRM     | protein tyrosine phosphatase, receptor type, M                       | 0.0043 | 2.13  | Normal up vs > 5 Years Off IS Tolerant   |
| 238241_PM_at    | ---       | ---                                                                  | 0.0043 | -1.50 | Normal down vs > 5 Years Off IS Tolerant |
| 221587_PM_s_at  | C19orf24  | chromosome 19 open reading frame 24                                  | 0.0043 | 1.45  | Normal up vs > 5 Years Off IS Tolerant   |
| 234486_PM_at    | OR51B2    | olfactory receptor, family 51, subfamily B, member 2                 | 0.0043 | -1.65 | Normal down vs > 5 Years Off IS Tolerant |
| 233896_PM_s_at  | PAPLN     | papilin, proteoglycan-like sulfated glycoprotein                     | 0.0043 | -1.29 | Normal down vs > 5 Years Off IS Tolerant |
| 230644_PM_at    | LRFN5     | leucine rich repeat and fibronectin type III domain containing 5     | 0.0043 | -2.00 | Normal down vs > 5 Years Off IS Tolerant |
| 238985_PM_at    | ---       | ---                                                                  | 0.0043 | -1.72 | Normal down vs > 5 Years Off IS Tolerant |
| 1566548_PM_at   | ---       | ---                                                                  | 0.0043 | -1.44 | Normal down vs > 5 Years Off IS Tolerant |
| 226566_PM_at    | TRIM11    | tripartite motif-containing 11                                       | 0.0043 | 1.41  | Normal up vs > 5 Years Off IS Tolerant   |
| 37793_PM_r_at   | RAD51L3   | RAD51-like 3 ( <i>S. cerevisiae</i> )                                | 0.0043 | -1.60 | Normal down vs > 5 Years Off IS Tolerant |

|                 |          |                                                                                         |        |       |                                          |
|-----------------|----------|-----------------------------------------------------------------------------------------|--------|-------|------------------------------------------|
| 227435_PM_at    | KIAA2018 | KIAA2018                                                                                | 0.0043 | 1.24  | Normal up vs > 5 Years Off IS Tolerant   |
| 221184_PM_at    | ---      | ---                                                                                     | 0.0043 | -1.48 | Normal down vs > 5 Years Off IS Tolerant |
| 220107_PM_s_at  | FAM164C  | family with sequence similarity 164, member C                                           | 0.0043 | -1.21 | Normal down vs > 5 Years Off IS Tolerant |
| 204433_PM_s_at  | SPATA2   | spermatogenesis associated 2                                                            | 0.0043 | 1.57  | Normal up vs > 5 Years Off IS Tolerant   |
| 1556472_PM_s_at | SCML4    | sex comb on midleg-like 4 (Drosophila)                                                  | 0.0043 | 1.79  | Normal up vs > 5 Years Off IS Tolerant   |
| 229204_PM_at    | ---      | ---                                                                                     | 0.0043 | 1.93  | Normal up vs > 5 Years Off IS Tolerant   |
| 203458_PM_at    | SPR      | sepiapterin reductase (7,8-dihydrobiopterin:NADP+ oxidoreductase)                       | 0.0043 | -1.42 | Normal down vs > 5 Years Off IS Tolerant |
| 1556325_PM_at   | FILIP1   | filamin A interacting protein 1                                                         | 0.0043 | -1.27 | Normal down vs > 5 Years Off IS Tolerant |
| 217539_PM_at    | C18orf25 | chromosome 18 open reading frame 25                                                     | 0.0043 | -1.41 | Normal down vs > 5 Years Off IS Tolerant |
| 39891_PM_at     | ZNF710   | zinc finger protein 710                                                                 | 0.0043 | -1.46 | Normal down vs > 5 Years Off IS Tolerant |
| 228501_PM_at    | GALNTL2  | UDP-N-acetyl-alpha-D-galactosamine:polypeptide N-acetylgalactosaminyltransferase-like 2 | 0.0043 | -1.38 | Normal down vs > 5 Years Off IS Tolerant |
| 205863_PM_at    | S100A12  | S100 calcium binding protein A12                                                        | 0.0043 | -1.79 | Normal down vs > 5 Years Off IS Tolerant |
| 243878_PM_at    | ---      | ---                                                                                     | 0.0043 | 1.89  | Normal up vs > 5 Years Off IS Tolerant   |
| 208814_PM_at    | HSPA4    | heat shock 70kDa protein 4                                                              | 0.0043 | -1.73 | Normal down vs > 5 Years Off IS Tolerant |
| 227413_PM_at    | UBLCP1   | ubiquitin-like domain containing CTD phosphatase 1                                      | 0.0043 | 1.57  | Normal up vs > 5 Years Off IS Tolerant   |
| 1570176_PM_at   | ---      | ---                                                                                     | 0.0043 | -1.29 | Normal down vs > 5 Years Off IS Tolerant |
| 200975_PM_at    | PPT1     | palmitoyl-protein thioesterase 1                                                        | 0.0043 | -1.40 | Normal down vs > 5 Years Off IS Tolerant |
| 236364_PM_at    | ---      | ---                                                                                     | 0.0043 | -1.60 | Normal down vs > 5 Years Off IS Tolerant |
| 205193_PM_at    | MAFF     | v-maf musculoaponeurotic fibrosarcoma oncogene homolog F (avian)                        | 0.0043 | 4.82  | Normal up vs > 5 Years Off IS Tolerant   |
| 1570398_PM_at   | STBD1    | Starch binding domain 1                                                                 | 0.0043 | -1.22 | Normal down vs > 5 Years Off IS Tolerant |
| 223774_PM_at    | SNHG12   | small nucleolar RNA host gene 12 (non-protein coding)                                   | 0.0043 | 1.52  | Normal up vs > 5 Years Off IS Tolerant   |
| 221199_PM_at    | GFRA4    | GDNF family receptor alpha 4                                                            | 0.0043 | -1.42 | Normal down vs > 5 Years Off IS Tolerant |

|                 |                      |                                                                                         |        |       |                                          |
|-----------------|----------------------|-----------------------------------------------------------------------------------------|--------|-------|------------------------------------------|
| 206826_PM_at    | PMP2                 | peripheral myelin protein 2                                                             | 0.0043 | -1.41 | Normal down vs > 5 Years Off IS Tolerant |
| 227748_PM_at    | RBMXL1               | RNA binding motif protein, X-linked-like 1                                              | 0.0043 | 1.73  | Normal up vs > 5 Years Off IS Tolerant   |
| 238911_PM_at    | STARD10              | StAR-related lipid transfer (START) domain containing 10                                | 0.0043 | 1.38  | Normal up vs > 5 Years Off IS Tolerant   |
| 244536_PM_at    | ---                  | ---                                                                                     | 0.0043 | 1.88  | Normal up vs > 5 Years Off IS Tolerant   |
| 223505_PM_s_at  | DNAJC27              | DnaJ (Hsp40) homolog, subfamily C, member 27                                            | 0.0043 | 1.42  | Normal up vs > 5 Years Off IS Tolerant   |
| 1569490_PM_at   | FNDC3B               | fibronectin type III domain containing 3B                                               | 0.0043 | -1.35 | Normal down vs > 5 Years Off IS Tolerant |
| 227861_PM_at    | TMEM161B             | transmembrane protein 161B                                                              | 0.0043 | 1.45  | Normal up vs > 5 Years Off IS Tolerant   |
| 229702_PM_at    | CSNK1G3              | casein kinase 1, gamma 3                                                                | 0.0043 | -1.32 | Normal down vs > 5 Years Off IS Tolerant |
| 1565576_PM_at   | ---                  | ---                                                                                     | 0.0044 | -1.41 | Normal down vs > 5 Years Off IS Tolerant |
| 224581_PM_s_at  | NUCKS1               | nuclear casein kinase and cyclin-dependent kinase substrate 1                           | 0.0044 | 1.38  | Normal up vs > 5 Years Off IS Tolerant   |
| 201148_PM_s_at  | TIMP3                | TIMP metalloproteinase inhibitor 3                                                      | 0.0044 | -1.45 | Normal down vs > 5 Years Off IS Tolerant |
| 32259_PM_at     | EZH1                 | enhancer of zeste homolog 1 (Drosophila)                                                | 0.0044 | 1.36  | Normal up vs > 5 Years Off IS Tolerant   |
| 1553335_PM_x_at | LOC285696            | hypothetical LOC285696                                                                  | 0.0044 | -1.54 | Normal down vs > 5 Years Off IS Tolerant |
| 244495_PM_x_at  | C18orf45             | chromosome 18 open reading frame 45                                                     | 0.0044 | -1.98 | Normal down vs > 5 Years Off IS Tolerant |
| 201112_PM_s_at  | CSE1L                | CSE1 chromosome segregation 1-like (yeast)                                              | 0.0044 | 1.53  | Normal up vs > 5 Years Off IS Tolerant   |
| 224590_PM_at    | XIST                 | X (inactive)-specific transcript (non-protein coding)                                   | 0.0044 | 22.26 | Normal up vs > 5 Years Off IS Tolerant   |
| 200092_PM_s_at  | RPL37                | ribosomal protein L37                                                                   | 0.0044 | 1.11  | Normal up vs > 5 Years Off IS Tolerant   |
| 234414_PM_at    | FAM22F ///<br>FAM22G | family with sequence similarity 22, member F /// family with sequence similarity 22, me | 0.0044 | -1.69 | Normal down vs > 5 Years Off IS Tolerant |
| 217934_PM_x_at  | STUB1                | STIP1 homology and U-box containing protein 1, E3 ubiquitin protein ligase              | 0.0044 | 1.33  | Normal up vs > 5 Years Off IS Tolerant   |
| 225071_PM_at    | NUS1                 | nuclear undecaprenyl pyrophosphate synthase 1 homolog (S. cerevisiae)                   | 0.0044 | 1.56  | Normal up vs > 5 Years Off IS Tolerant   |
| 222770_PM_s_at  | GUF1                 | GUF1 GTPase homolog (S. cerevisiae)                                                     | 0.0044 | 1.66  | Normal up vs > 5 Years Off IS Tolerant   |
| 210452_PM_x_at  | CYP4F2               | cytochrome P450, family 4, subfamily F, polypeptide 2                                   | 0.0044 | -1.30 | Normal down vs > 5 Years Off IS Tolerant |
| 213484_PM_at    | ---                  | ---                                                                                     | 0.0044 | 1.35  | Normal up vs > 5 Years Off IS Tolerant   |
| 200066_PM_at    | IK                   | IK cytokine, down-regulator of HLA II                                                   | 0.0044 | 1.16  | Normal up vs > 5 Years Off IS Tolerant   |
| 237414_PM_at    | F7                   | coagulation factor VII (serum prothrombin conversion accelerator)                       | 0.0044 | -1.35 | Normal down vs > 5 Years Off IS Tolerant |



|                |                           |                                                                                         |        |       |                                          |
|----------------|---------------------------|-----------------------------------------------------------------------------------------|--------|-------|------------------------------------------|
| 1554110_PM_at  | CDCP1                     | CUB domain containing protein 1                                                         | 0.0044 | -1.40 | Normal down vs > 5 Years Off IS Tolerant |
| 228151_PM_at   | ---                       | ---                                                                                     | 0.0044 | 1.50  | Normal up vs > 5 Years Off IS Tolerant   |
| 209729_PM_at   | GAS2L1                    | growth arrest-specific 2 like 1                                                         | 0.0044 | 1.73  | Normal up vs > 5 Years Off IS Tolerant   |
| 222263_PM_at   | SLC35E1                   | solute carrier family 35, member E1                                                     | 0.0044 | 1.96  | Normal up vs > 5 Years Off IS Tolerant   |
| 229992_PM_at   | LOC149837                 | hypothetical LOC149837                                                                  | 0.0044 | -1.40 | Normal down vs > 5 Years Off IS Tolerant |
| 205435_PM_s_at | AAK1                      | AP2 associated kinase 1                                                                 | 0.0044 | 1.61  | Normal up vs > 5 Years Off IS Tolerant   |
| 202920_PM_at   | ANK2                      | ankyrin 2, neuronal                                                                     | 0.0044 | -1.42 | Normal down vs > 5 Years Off IS Tolerant |
| 1555049_PM_at  | C21orf29                  | chromosome 21 open reading frame 29                                                     | 0.0044 | -1.27 | Normal down vs > 5 Years Off IS Tolerant |
| 209056_PM_s_at | CDC5L                     | CDC5 cell division cycle 5-like (S. pombe)                                              | 0.0044 | 1.50  | Normal up vs > 5 Years Off IS Tolerant   |
| 233987_PM_at   | TFAP2D                    | transcription factor AP-2 delta (activating enhancer binding protein 2 delta)           | 0.0044 | -1.26 | Normal down vs > 5 Years Off IS Tolerant |
| 219853_PM_at   | FKRP                      | fukutin related protein                                                                 | 0.0044 | 1.52  | Normal up vs > 5 Years Off IS Tolerant   |
| 223712_PM_at   | PCBD2                     | pterin-4 alpha-carbinolamine dehydratase/dimerization cofactor of hepatocyte nuclear fa | 0.0044 | 1.50  | Normal up vs > 5 Years Off IS Tolerant   |
| 235518_PM_at   | SLC8A1                    | solute carrier family 8 (sodium/calcium exchanger), member 1                            | 0.0044 | -1.75 | Normal down vs > 5 Years Off IS Tolerant |
| 1564211_PM_at  | C14orf64                  | chromosome 14 open reading frame 64                                                     | 0.0044 | 1.52  | Normal up vs > 5 Years Off IS Tolerant   |
| 1569755_PM_at  | NCRNA00276                | non-protein coding RNA 276                                                              | 0.0044 | -1.50 | Normal down vs > 5 Years Off IS Tolerant |
| 1566691_PM_at  | ---                       | ---                                                                                     | 0.0044 | -1.29 | Normal down vs > 5 Years Off IS Tolerant |
| 204109_PM_s_at | NFYA                      | nuclear transcription factor Y, alpha                                                   | 0.0044 | 2.03  | Normal up vs > 5 Years Off IS Tolerant   |
| 232811_PM_x_at | PRICKLE1                  | Prickle homolog 1 (Drosophila)                                                          | 0.0044 | -2.59 | Normal down vs > 5 Years Off IS Tolerant |
| 218280_PM_x_at | HIST2H2AA3 /// HIST2H2AA4 | histone cluster 2, H2aa3 /// histone cluster 2, H2aa4                                   | 0.0044 | 1.60  | Normal up vs > 5 Years Off IS Tolerant   |
| 243780_PM_at   | ---                       | ---                                                                                     | 0.0044 | 2.53  | Normal up vs > 5 Years Off IS Tolerant   |
| 1570146_PM_at  | ---                       | ---                                                                                     | 0.0044 | -1.27 | Normal down vs > 5 Years Off IS Tolerant |
| 225256_PM_at   | ---                       | ---                                                                                     | 0.0044 | 1.79  | Normal up vs > 5 Years Off IS Tolerant   |
| 240989_PM_at   | ---                       | ---                                                                                     | 0.0044 | -2.14 | Normal down vs > 5 Years Off IS Tolerant |
| 1566778_PM_at  | ---                       | ---                                                                                     | 0.0044 | -1.30 | Normal down vs > 5 Years Off IS Tolerant |

|                 |              |                                                                |        |       |                                          |
|-----------------|--------------|----------------------------------------------------------------|--------|-------|------------------------------------------|
| 1564744_PM_at   | ---          | ---                                                            | 0.0044 | -1.43 | Normal down vs > 5 Years Off IS Tolerant |
| 226620_PM_x_at  | DAZAP1       | DAZ associated protein 1                                       | 0.0044 | 1.24  | Normal up vs > 5 Years Off IS Tolerant   |
| 209048_PM_s_at  | ZMYND8       | zinc finger, MYND-type containing 8                            | 0.0044 | 1.47  | Normal up vs > 5 Years Off IS Tolerant   |
| 1554355_PM_a_at | SIAE         | sialic acid acetyltransferase                                  | 0.0044 | -1.66 | Normal down vs > 5 Years Off IS Tolerant |
| 218472_PM_s_at  | PELO         | pelota homolog (Drosophila)                                    | 0.0045 | 1.75  | Normal up vs > 5 Years Off IS Tolerant   |
| 218865_PM_at    | MOSC1        | MOCO sulphurase C-terminal domain containing 1                 | 0.0045 | -2.05 | Normal down vs > 5 Years Off IS Tolerant |
| 206299_PM_at    | FAM155B      | family with sequence similarity 155, member B                  | 0.0045 | -1.39 | Normal down vs > 5 Years Off IS Tolerant |
| 241601_PM_at    | WIPF3        | WAS/WASL interacting protein family, member 3                  | 0.0045 | -1.40 | Normal down vs > 5 Years Off IS Tolerant |
| 233306_PM_at    | ---          | ---                                                            | 0.0045 | -1.42 | Normal down vs > 5 Years Off IS Tolerant |
| 238380_PM_s_at  | LOC100290278 | Similar to homer homolog 2                                     | 0.0045 | -1.64 | Normal down vs > 5 Years Off IS Tolerant |
| 235608_PM_at    | ---          | ---                                                            | 0.0045 | 1.42  | Normal up vs > 5 Years Off IS Tolerant   |
| 223369_PM_at    | METTL11A     | methyltransferase like 11A                                     | 0.0045 | 1.71  | Normal up vs > 5 Years Off IS Tolerant   |
| 217276_PM_x_at  | SERHL2       | serine hydrolase-like 2                                        | 0.0045 | -1.27 | Normal down vs > 5 Years Off IS Tolerant |
| 219133_PM_at    | OXSM         | 3-oxoacyl-ACP synthase, mitochondrial                          | 0.0045 | 1.59  | Normal up vs > 5 Years Off IS Tolerant   |
| 1554850_PM_at   | VWA5B2       | von Willebrand factor A domain containing 5B2                  | 0.0045 | -1.32 | Normal down vs > 5 Years Off IS Tolerant |
| 204685_PM_s_at  | ATP2B2       | ATPase, Ca <sup>++</sup> transporting, plasma membrane 2       | 0.0045 | -1.36 | Normal down vs > 5 Years Off IS Tolerant |
| 1569690_PM_at   | CCDC36       | coiled-coil domain containing 36                               | 0.0045 | -1.42 | Normal down vs > 5 Years Off IS Tolerant |
| 1564674_PM_a_at | CDC20B       | cell division cycle 20 homolog B ( <i>S. cerevisiae</i> )      | 0.0045 | -1.26 | Normal down vs > 5 Years Off IS Tolerant |
| 231291_PM_at    | ---          | ---                                                            | 0.0045 | 1.40  | Normal up vs > 5 Years Off IS Tolerant   |
| 207256_PM_at    | MBL2         | mannose-binding lectin (protein C) 2, soluble (opsonic defect) | 0.0045 | -1.47 | Normal down vs > 5 Years Off IS Tolerant |
| 1566177_PM_at   | ---          | ---                                                            | 0.0045 | -1.49 | Normal down vs > 5 Years Off IS Tolerant |
| 215908_PM_at    | ---          | ---                                                            | 0.0045 | 1.52  | Normal up vs > 5 Years Off IS Tolerant   |
| 233311_PM_at    | LOC145845    | hypothetical LOC145845                                         | 0.0045 | -2.06 | Normal down vs > 5 Years Off IS Tolerant |

|                 |                       |                                                                                         |        |       |                                          |
|-----------------|-----------------------|-----------------------------------------------------------------------------------------|--------|-------|------------------------------------------|
| 231474_PM_at    | C6orf221              | chromosome 6 open reading frame 221                                                     | 0.0045 | -1.29 | Normal down vs > 5 Years Off IS Tolerant |
| 232508_PM_at    | ZMIZ1                 | zinc finger, MIZ-type containing 1                                                      | 0.0045 | -1.46 | Normal down vs > 5 Years Off IS Tolerant |
| 210201_PM_x_at  | BIN1                  | bridging integrator 1                                                                   | 0.0045 | 1.69  | Normal up vs > 5 Years Off IS Tolerant   |
| 202839_PM_s_at  | NDUFB7                | NADH dehydrogenase (ubiquinone) 1 beta subcomplex, 7, 18kDa                             | 0.0045 | 1.51  | Normal up vs > 5 Years Off IS Tolerant   |
| 228890_PM_at    | ATOH8                 | atonal homolog 8 (Drosophila)                                                           | 0.0045 | -1.27 | Normal down vs > 5 Years Off IS Tolerant |
| 208794_PM_s_at  | SMARCA4               | SWI/SNF related, matrix associated, actin dependent regulator of chromatin, subfamily a | 0.0045 | 1.26  | Normal up vs > 5 Years Off IS Tolerant   |
| 219089_PM_s_at  | ZNF576                | zinc finger protein 576                                                                 | 0.0045 | -1.48 | Normal down vs > 5 Years Off IS Tolerant |
| 214146_PM_s_at  | PPBP                  | pro-platelet basic protein (chemokine (C-X-C motif) ligand 7)                           | 0.0045 | 1.90  | Normal up vs > 5 Years Off IS Tolerant   |
| 234551_PM_at    | OTOP2                 | otopetrin 2                                                                             | 0.0045 | -1.28 | Normal down vs > 5 Years Off IS Tolerant |
| 228622_PM_s_at  | DNAJC4                | DnaJ (Hsp40) homolog, subfamily C, member 4                                             | 0.0045 | 1.35  | Normal up vs > 5 Years Off IS Tolerant   |
| 231332_PM_at    | ---                   | ---                                                                                     | 0.0045 | 1.71  | Normal up vs > 5 Years Off IS Tolerant   |
| 229781_PM_at    | LOC100506725          | hypothetical LOC100506725                                                               | 0.0045 | -1.32 | Normal down vs > 5 Years Off IS Tolerant |
| 229335_PM_at    | CADM4                 | cell adhesion molecule 4                                                                | 0.0045 | -1.24 | Normal down vs > 5 Years Off IS Tolerant |
| 241258_PM_at    | ---                   | ---                                                                                     | 0.0045 | -1.24 | Normal down vs > 5 Years Off IS Tolerant |
| 1564083_PM_at   | ---                   | ---                                                                                     | 0.0045 | -1.54 | Normal down vs > 5 Years Off IS Tolerant |
| 1553998_PM_at   | DMRTC1 ///<br>DMRTC1B | DMRT-like family C1 /// DMRT-like family C1B                                            | 0.0045 | 1.47  | Normal up vs > 5 Years Off IS Tolerant   |
| 1557196_PM_a_at | ---                   | ---                                                                                     | 0.0045 | -1.42 | Normal down vs > 5 Years Off IS Tolerant |
| 41469_PM_at     | PI3                   | peptidase inhibitor 3, skin-derived                                                     | 0.0045 | -1.22 | Normal down vs > 5 Years Off IS Tolerant |
| 38269_PM_at     | PRKD2                 | protein kinase D2                                                                       | 0.0045 | 1.37  | Normal up vs > 5 Years Off IS Tolerant   |
| 220705_PM_s_at  | ADAMTS7               | ADAM metallopeptidase with thrombospondin type 1 motif, 7                               | 0.0045 | -1.34 | Normal down vs > 5 Years Off IS Tolerant |
| 231729_PM_s_at  | CAPS                  | calcyphosine                                                                            | 0.0045 | 1.35  | Normal up vs > 5 Years Off IS Tolerant   |
| 216969_PM_s_at  | KIF22                 | kinesin family member 22                                                                | 0.0045 | 1.33  | Normal up vs > 5 Years Off IS Tolerant   |

|                |          |                                                                                |        |       |                                          |
|----------------|----------|--------------------------------------------------------------------------------|--------|-------|------------------------------------------|
| 241579_PM_at   | ---      | ---                                                                            | 0.0045 | -1.81 | Normal down vs > 5 Years Off IS Tolerant |
| 233207_PM_at   | DISC1    | disrupted in schizophrenia 1                                                   | 0.0045 | -1.54 | Normal down vs > 5 Years Off IS Tolerant |
| 235155_PM_at   | BDH2     | 3-hydroxybutyrate dehydrogenase, type 2                                        | 0.0045 | -1.50 | Normal down vs > 5 Years Off IS Tolerant |
| 232826_PM_at   | ---      | ---                                                                            | 0.0045 | 1.43  | Normal up vs > 5 Years Off IS Tolerant   |
| 1560013_PM_at  | PDXDC1   | pyridoxal-dependent decarboxylase domain containing 1                          | 0.0045 | 2.13  | Normal up vs > 5 Years Off IS Tolerant   |
| 204635_PM_at   | RPS6KA5  | ribosomal protein S6 kinase, 90kDa, polypeptide 5                              | 0.0045 | 1.44  | Normal up vs > 5 Years Off IS Tolerant   |
| 218818_PM_at   | FHL3     | four and a half LIM domains 3                                                  | 0.0046 | -1.45 | Normal down vs > 5 Years Off IS Tolerant |
| 229423_PM_at   | ---      | ---                                                                            | 0.0046 | 1.48  | Normal up vs > 5 Years Off IS Tolerant   |
| 212627_PM_s_at | EXOSC7   | exosome component 7                                                            | 0.0046 | 1.44  | Normal up vs > 5 Years Off IS Tolerant   |
| 226326_PM_at   | PCGF5    | polycomb group ring finger 5                                                   | 0.0046 | 1.44  | Normal up vs > 5 Years Off IS Tolerant   |
| 59625_PM_at    | NOL3     | nucleolar protein 3 (apoptosis repressor with CARD domain)                     | 0.0046 | -1.34 | Normal down vs > 5 Years Off IS Tolerant |
| 237673_PM_at   | ---      | ---                                                                            | 0.0046 | -1.23 | Normal down vs > 5 Years Off IS Tolerant |
| 241821_PM_at   | ---      | ---                                                                            | 0.0046 | -1.49 | Normal down vs > 5 Years Off IS Tolerant |
| 228466_PM_at   | GABPB2   | GA binding protein transcription factor, beta subunit 2                        | 0.0046 | 1.51  | Normal up vs > 5 Years Off IS Tolerant   |
| 218217_PM_at   | SCPEP1   | serine carboxypeptidase 1                                                      | 0.0046 | -1.45 | Normal down vs > 5 Years Off IS Tolerant |
| 206164_PM_at   | CLCA2    | chloride channel accessory 2                                                   | 0.0046 | -1.40 | Normal down vs > 5 Years Off IS Tolerant |
| 225030_PM_at   | BOD1     | biorientation of chromosomes in cell division 1                                | 0.0046 | 1.51  | Normal up vs > 5 Years Off IS Tolerant   |
| 238255_PM_at   | ---      | ---                                                                            | 0.0046 | -1.34 | Normal down vs > 5 Years Off IS Tolerant |
| 212925_PM_at   | C19orf21 | chromosome 19 open reading frame 21                                            | 0.0046 | -1.33 | Normal down vs > 5 Years Off IS Tolerant |
| 208667_PM_s_at | ST13     | suppression of tumorigenicity 13 (colon carcinoma) (Hsp70 interacting protein) | 0.0046 | 1.63  | Normal up vs > 5 Years Off IS Tolerant   |
| 225448_PM_at   | NAPG     | N-ethylmaleimide-sensitive factor attachment protein, gamma                    | 0.0046 | 1.86  | Normal up vs > 5 Years Off IS Tolerant   |
| 221425_PM_s_at | ISCA1    | iron-sulfur cluster assembly 1 homolog (S. cerevisiae)                         | 0.0046 | 2.06  | Normal up vs > 5 Years Off IS Tolerant   |
| 234323_PM_at   | THSD4    | Thrombospondin, type I, domain containing 4                                    | 0.0046 | -1.29 | Normal down vs > 5 Years Off IS Tolerant |

|                |                                    |                                                                                         |        |       |                                          |
|----------------|------------------------------------|-----------------------------------------------------------------------------------------|--------|-------|------------------------------------------|
| 1554264_PM_at  | CKAP2                              | cytoskeleton associated protein 2                                                       | 0.0046 | 1.60  | Normal up vs > 5 Years Off IS Tolerant   |
| 206342_PM_x_at | IDS                                | iduronate 2-sulfatase                                                                   | 0.0046 | 1.63  | Normal up vs > 5 Years Off IS Tolerant   |
| 238213_PM_at   | ---                                | ---                                                                                     | 0.0046 | -1.33 | Normal down vs > 5 Years Off IS Tolerant |
| 218368_PM_s_at | TNFRSF12A                          | tumor necrosis factor receptor superfamily, member 12A                                  | 0.0046 | -1.80 | Normal down vs > 5 Years Off IS Tolerant |
| 236198_PM_at   | ---                                | ---                                                                                     | 0.0046 | 1.91  | Normal up vs > 5 Years Off IS Tolerant   |
| 200098_PM_s_at | ANAPC5                             | anaphase promoting complex subunit 5                                                    | 0.0046 | 1.20  | Normal up vs > 5 Years Off IS Tolerant   |
| 232966_PM_at   | LPIN3                              | lipin 3                                                                                 | 0.0046 | -1.33 | Normal down vs > 5 Years Off IS Tolerant |
| 232577_PM_at   | LOC145945                          | hypothetical protein LOC145945                                                          | 0.0046 | -1.52 | Normal down vs > 5 Years Off IS Tolerant |
| 219946_PM_x_at | MYH14                              | myosin, heavy chain 14, non-muscle                                                      | 0.0046 | -1.47 | Normal down vs > 5 Years Off IS Tolerant |
| 203396_PM_at   | PSMA4                              | proteasome (prosome, macropain) subunit, alpha type, 4                                  | 0.0046 | -1.27 | Normal down vs > 5 Years Off IS Tolerant |
| 226513_PM_at   | ASB7                               | ankyrin repeat and SOCS box-containing 7                                                | 0.0046 | 1.94  | Normal up vs > 5 Years Off IS Tolerant   |
| 235980_PM_at   | PIK3CA                             | phosphoinositide-3-kinase, catalytic, alpha polypeptide                                 | 0.0046 | 1.44  | Normal up vs > 5 Years Off IS Tolerant   |
| 226540_PM_at   | CCDC42B                            | coiled-coil domain containing 42B                                                       | 0.0046 | -1.62 | Normal down vs > 5 Years Off IS Tolerant |
| 201217_PM_x_at | RPL3                               | ribosomal protein L3                                                                    | 0.0046 | 1.21  | Normal up vs > 5 Years Off IS Tolerant   |
| 225463_PM_x_at | GPR89A ///<br>GPR89B ///<br>GPR89C | G protein-coupled receptor 89A /// G protein-coupled receptor 89B /// G protein-coupled | 0.0046 | 1.40  | Normal up vs > 5 Years Off IS Tolerant   |
| 201451_PM_x_at | RHEB                               | Ras homolog enriched in brain                                                           | 0.0046 | -1.37 | Normal down vs > 5 Years Off IS Tolerant |
| 235646_PM_at   | ---                                | ---                                                                                     | 0.0046 | 1.51  | Normal up vs > 5 Years Off IS Tolerant   |
| 1560402_PM_at  | GAS5                               | growth arrest-specific 5 (non-protein coding)                                           | 0.0046 | 1.28  | Normal up vs > 5 Years Off IS Tolerant   |
| 226983_PM_at   | ZNF777                             | zinc finger protein 777                                                                 | 0.0046 | 1.33  | Normal up vs > 5 Years Off IS Tolerant   |
| 160020_PM_at   | MMP14                              | matrix metalloproteinase 14 (membrane-inserted)                                         | 0.0046 | -1.50 | Normal down vs > 5 Years Off IS Tolerant |
| 200705_PM_s_at | EEF1B2                             | eukaryotic translation elongation factor 1 beta 2                                       | 0.0046 | 1.33  | Normal up vs > 5 Years Off IS Tolerant   |
| 203565_PM_s_at | MNAT1                              | menage a trois homolog 1, cyclin H assembly factor (Xenopus laevis)                     | 0.0046 | 1.45  | Normal up vs > 5 Years Off IS Tolerant   |
| 1569554_PM_at  | ESR2                               | Estrogen receptor 2 (ER beta)                                                           | 0.0046 | -1.53 | Normal down vs > 5 Years Off IS Tolerant |
| 218093_PM_s_at | ANKRD10                            | ankyrin repeat domain 10                                                                | 0.0046 | 1.33  | Normal up vs > 5 Years Off IS Tolerant   |

|                 |              |                                                                     |        |       |                                          |
|-----------------|--------------|---------------------------------------------------------------------|--------|-------|------------------------------------------|
| 230895_PM_at    | HAPLN1       | hyaluronan and proteoglycan link protein 1                          | 0.0046 | -1.41 | Normal down vs > 5 Years Off IS Tolerant |
| 211087_PM_x_at  | MAPK14       | mitogen-activated protein kinase 14                                 | 0.0046 | -1.52 | Normal down vs > 5 Years Off IS Tolerant |
| 1556058_PM_s_at | SPEN         | spen homolog, transcriptional regulator (Drosophila)                | 0.0046 | 1.36  | Normal up vs > 5 Years Off IS Tolerant   |
| 214702_PM_at    | FN1          | fibronectin 1                                                       | 0.0047 | -1.50 | Normal down vs > 5 Years Off IS Tolerant |
| 206101_PM_at    | ECM2         | extracellular matrix protein 2, female organ and adipocyte specific | 0.0047 | -1.40 | Normal down vs > 5 Years Off IS Tolerant |
| 228551_PM_at    | DENND5B      | DENN/MADD domain containing 5B                                      | 0.0047 | 1.68  | Normal up vs > 5 Years Off IS Tolerant   |
| 233538_PM_s_at  | CYBB         | Cytochrome b-245, beta polypeptide                                  | 0.0047 | -1.32 | Normal down vs > 5 Years Off IS Tolerant |
| 1558019_PM_at   | ---          | ---                                                                 | 0.0047 | -1.38 | Normal down vs > 5 Years Off IS Tolerant |
| 205868_PM_s_at  | PTPN11       | protein tyrosine phosphatase, non-receptor type 11                  | 0.0047 | -1.46 | Normal down vs > 5 Years Off IS Tolerant |
| 1552490_PM_at   | LACE1        | lactation elevated 1                                                | 0.0047 | -2.03 | Normal down vs > 5 Years Off IS Tolerant |
| 218760_PM_at    | COQ6         | coenzyme Q6 homolog, monooxygenase (S. cerevisiae)                  | 0.0047 | 1.36  | Normal up vs > 5 Years Off IS Tolerant   |
| 224288_PM_x_at  | FKSG49       | FKSG49                                                              | 0.0047 | -2.05 | Normal down vs > 5 Years Off IS Tolerant |
| 239435_PM_x_at  | SHROOM1      | shroom family member 1                                              | 0.0047 | -1.82 | Normal down vs > 5 Years Off IS Tolerant |
| 220140_PM_s_at  | SNX11        | sorting nexin 11                                                    | 0.0047 | -1.60 | Normal down vs > 5 Years Off IS Tolerant |
| 201478_PM_s_at  | DKC1         | dyskeratosis congenita 1, dyskerin                                  | 0.0047 | 1.27  | Normal up vs > 5 Years Off IS Tolerant   |
| 233997_PM_at    | LOC100287166 | Similar to hCG2019076                                               | 0.0047 | -1.33 | Normal down vs > 5 Years Off IS Tolerant |
| 200036_PM_s_at  | RPL10A       | ribosomal protein L10a                                              | 0.0047 | 1.31  | Normal up vs > 5 Years Off IS Tolerant   |
| 213934_PM_s_at  | ZNF23        | zinc finger protein 23 (KOX 16)                                     | 0.0047 | 1.66  | Normal up vs > 5 Years Off IS Tolerant   |
| 243499_PM_at    | ---          | ---                                                                 | 0.0047 | -1.32 | Normal down vs > 5 Years Off IS Tolerant |
| 239235_PM_at    | ---          | ---                                                                 | 0.0047 | 1.29  | Normal up vs > 5 Years Off IS Tolerant   |
| 212945_PM_s_at  | MGA          | MAX gene associated                                                 | 0.0047 | 1.81  | Normal up vs > 5 Years Off IS Tolerant   |
| 212315_PM_s_at  | NUP210       | nucleoporin 210kDa                                                  | 0.0047 | 1.50  | Normal up vs > 5 Years Off IS Tolerant   |
| 213880_PM_at    | LGR5         | leucine-rich repeat-containing G protein-coupled receptor 5         | 0.0047 | -1.67 | Normal down vs > 5 Years Off IS Tolerant |

|                 |                  |                                                                            |        |       |                                          |
|-----------------|------------------|----------------------------------------------------------------------------|--------|-------|------------------------------------------|
| 244814_PM_at    | UGGT1            | UDP-glucose glycoprotein glucosyltransferase 1                             | 0.0047 | -1.30 | Normal down vs > 5 Years Off IS Tolerant |
| 214943_PM_s_at  | ARID4B /// RBM34 | AT rich interactive domain 4B (RBP1-like) /// RNA binding motif protein 34 | 0.0047 | 1.87  | Normal up vs > 5 Years Off IS Tolerant   |
| 205214_PM_at    | STK17B           | serine/threonine kinase 17b                                                | 0.0047 | 1.81  | Normal up vs > 5 Years Off IS Tolerant   |
| 203960_PM_s_at  | HSPB11           | heat shock protein family B (small), member 11                             | 0.0047 | 1.81  | Normal up vs > 5 Years Off IS Tolerant   |
| 203850_PM_s_at  | KIF1A            | kinesin family member 1A                                                   | 0.0047 | -1.57 | Normal down vs > 5 Years Off IS Tolerant |
| 222039_PM_at    | KIF18B           | kinesin family member 18B                                                  | 0.0047 | -1.28 | Normal down vs > 5 Years Off IS Tolerant |
| 208791_PM_at    | CLU              | clusterin                                                                  | 0.0047 | 2.92  | Normal up vs > 5 Years Off IS Tolerant   |
| 232077_PM_s_at  | YPEL3            | yippee-like 3 (Drosophila)                                                 | 0.0047 | 1.67  | Normal up vs > 5 Years Off IS Tolerant   |
| 1554342_PM_s_at | HELQ             | helicase, POLQ-like                                                        | 0.0047 | 1.76  | Normal up vs > 5 Years Off IS Tolerant   |
| 236966_PM_at    | ARMC8            | armadillo repeat containing 8                                              | 0.0047 | 1.58  | Normal up vs > 5 Years Off IS Tolerant   |
| 218131_PM_s_at  | GATAD2A          | GATA zinc finger domain containing 2A                                      | 0.0047 | 1.36  | Normal up vs > 5 Years Off IS Tolerant   |
| 1556226_PM_at   | ---              | ---                                                                        | 0.0047 | 1.51  | Normal up vs > 5 Years Off IS Tolerant   |
| 226728_PM_at    | SLC27A1          | solute carrier family 27 (fatty acid transporter), member 1                | 0.0047 | -1.57 | Normal down vs > 5 Years Off IS Tolerant |
| 224836_PM_at    | TP53INP2         | tumor protein p53 inducible nuclear protein 2                              | 0.0047 | 3.28  | Normal up vs > 5 Years Off IS Tolerant   |
| 213691_PM_at    | LOC100506002     | hypothetical protein LOC100506002                                          | 0.0047 | 1.43  | Normal up vs > 5 Years Off IS Tolerant   |
| 213083_PM_at    | SLC35D2          | solute carrier family 35, member D2                                        | 0.0047 | 1.46  | Normal up vs > 5 Years Off IS Tolerant   |
| 236024_PM_at    | GPM6A            | glycoprotein M6A                                                           | 0.0047 | -1.32 | Normal down vs > 5 Years Off IS Tolerant |
| 209123_PM_at    | QDPR             | quinoid dihydropteridine reductase                                         | 0.0047 | 1.81  | Normal up vs > 5 Years Off IS Tolerant   |
| 243504_PM_at    | ---              | ---                                                                        | 0.0047 | -1.25 | Normal down vs > 5 Years Off IS Tolerant |
| 202334_PM_s_at  | UBE2B            | ubiquitin-conjugating enzyme E2B (RAD6 homolog)                            | 0.0047 | 1.42  | Normal up vs > 5 Years Off IS Tolerant   |
| 244538_PM_at    | KCTD19           | potassium channel tetramerisation domain containing 19                     | 0.0047 | -1.28 | Normal down vs > 5 Years Off IS Tolerant |
| 217204_PM_at    | MTRF1L           | Mitochondrial translational release factor 1-like                          | 0.0047 | -1.67 | Normal down vs > 5 Years Off IS Tolerant |
| 1554980_PM_a_at | ATF3             | activating transcription factor 3                                          | 0.0047 | 2.85  | Normal up vs > 5 Years Off IS Tolerant   |
| 227033_PM_at    | PDIA3            | protein disulfide isomerase family A, member 3                             | 0.0047 | 1.79  | Normal up vs > 5 Years Off IS Tolerant   |
| 1562693_PM_at   | ---              | ---                                                                        | 0.0048 | -1.35 | Normal down vs > 5 Years Off IS Tolerant |
| 207021_PM_at    | ZPBP             | zona pellucida binding protein                                             | 0.0048 | -1.58 | Normal down vs > 5 Years Off IS Tolerant |
| 224588_PM_at    | XIST             | X (inactive)-specific transcript (non-protein coding)                      | 0.0048 | 58.32 | Normal up vs > 5 Years Off IS Tolerant   |
| 203240_PM_at    | FCGBP            | Fc fragment of IgG binding protein                                         | 0.0048 | 1.80  | Normal up vs > 5 Years Off IS Tolerant   |

|                 |              |                                                                   |        |       |                                          |
|-----------------|--------------|-------------------------------------------------------------------|--------|-------|------------------------------------------|
| 203710_PM_at    | ITPR1        | inositol 1,4,5-triphosphate receptor, type 1                      | 0.0048 | 1.37  | Normal up vs > 5 Years Off IS Tolerant   |
| 231357_PM_at    | CLEC12B      | C-type lectin domain family 12, member B                          | 0.0048 | -1.96 | Normal down vs > 5 Years Off IS Tolerant |
| 216305_PM_s_at  | C2orf3       | chromosome 2 open reading frame 3                                 | 0.0048 | 1.72  | Normal up vs > 5 Years Off IS Tolerant   |
| 206568_PM_at    | TNP1         | transition protein 1 (during histone to protamine replacement)    | 0.0048 | -1.28 | Normal down vs > 5 Years Off IS Tolerant |
| 203538_PM_at    | CAMLG        | calcium modulating ligand                                         | 0.0048 | 1.27  | Normal up vs > 5 Years Off IS Tolerant   |
| 228011_PM_at    | FAM92A1      | family with sequence similarity 92, member A1                     | 0.0048 | -1.26 | Normal down vs > 5 Years Off IS Tolerant |
| 211924_PM_s_at  | PLAUR        | plasminogen activator, urokinase receptor                         | 0.0048 | 2.74  | Normal up vs > 5 Years Off IS Tolerant   |
| 210213_PM_s_at  | EIF6         | eukaryotic translation initiation factor 6                        | 0.0048 | 1.43  | Normal up vs > 5 Years Off IS Tolerant   |
| 219799_PM_s_at  | DHRS9        | dehydrogenase/reductase (SDR family) member 9                     | 0.0048 | -1.92 | Normal down vs > 5 Years Off IS Tolerant |
| 208815_PM_x_at  | HSPA4        | heat shock 70kDa protein 4                                        | 0.0048 | 1.41  | Normal up vs > 5 Years Off IS Tolerant   |
| 218319_PM_at    | PELI1        | pellino homolog 1 (Drosophila)                                    | 0.0048 | 1.99  | Normal up vs > 5 Years Off IS Tolerant   |
| 226709_PM_at    | ROBO2        | roundabout, axon guidance receptor, homolog 2 (Drosophila)        | 0.0048 | -1.44 | Normal down vs > 5 Years Off IS Tolerant |
| 201110_PM_s_at  | THBS1        | thrombospondin 1                                                  | 0.0048 | 6.94  | Normal up vs > 5 Years Off IS Tolerant   |
| 236822_PM_at    | LOC100509856 | hypothetical LOC100509856                                         | 0.0048 | -1.31 | Normal down vs > 5 Years Off IS Tolerant |
| 90265_PM_at     | ADAP1        | ArfGAP with dual PH domains 1                                     | 0.0048 | -1.34 | Normal down vs > 5 Years Off IS Tolerant |
| 235082_PM_at    | PCNX         | pecanex homolog (Drosophila)                                      | 0.0048 | 1.39  | Normal up vs > 5 Years Off IS Tolerant   |
| 1560116_PM_a_at | NEDD1        | neural precursor cell expressed, developmentally down-regulated 1 | 0.0048 | 1.35  | Normal up vs > 5 Years Off IS Tolerant   |
| 210597_PM_x_at  | PRB1         | proline-rich protein BstNI subfamily 1                            | 0.0048 | -1.42 | Normal down vs > 5 Years Off IS Tolerant |
| 218875_PM_s_at  | FBXO5        | F-box protein 5                                                   | 0.0048 | 1.58  | Normal up vs > 5 Years Off IS Tolerant   |
| 206582_PM_s_at  | GPR56        | G protein-coupled receptor 56                                     | 0.0048 | -1.37 | Normal down vs > 5 Years Off IS Tolerant |
| 227291_PM_s_at  | BOLA3        | bolA homolog 3 (E. coli)                                          | 0.0048 | 1.63  | Normal up vs > 5 Years Off IS Tolerant   |
| 242799_PM_at    | ---          | ---                                                               | 0.0048 | -1.33 | Normal down vs > 5 Years Off IS Tolerant |
| 210458_PM_s_at  | TANK         | TRAF family member-associated NFKB activator                      | 0.0048 | 2.26  | Normal up vs > 5 Years Off IS Tolerant   |
| 210601_PM_at    | CDH6         | cadherin 6, type 2, K-cadherin (fetal kidney)                     | 0.0048 | -1.64 | Normal down vs > 5 Years Off IS Tolerant |
| 229620_PM_at    | ---          | ---                                                               | 0.0048 | -1.34 | Normal down vs > 5 Years Off IS Tolerant |



|                 |              |                                                                                         |        |       |                                          |
|-----------------|--------------|-----------------------------------------------------------------------------------------|--------|-------|------------------------------------------|
| 238090_PM_at    | HGSNAT       | heparan-alpha-glucosaminide N-acetyltransferase                                         | 0.0048 | -1.37 | Normal down vs > 5 Years Off IS Tolerant |
| 1553190_PM_s_at | PARD3B       | par-3 partitioning defective 3 homolog B (C. elegans)                                   | 0.0048 | -1.33 | Normal down vs > 5 Years Off IS Tolerant |
| 205212_PM_s_at  | ACAP1        | ArfGAP with coiled-coil, ankyrin repeat and PH domains 1                                | 0.0048 | 1.46  | Normal up vs > 5 Years Off IS Tolerant   |
| 208414_PM_s_at  | HOXB3        | homeobox B3                                                                             | 0.0048 | -1.47 | Normal down vs > 5 Years Off IS Tolerant |
| 1861_PM_at      | BAD          | BCL2-associated agonist of cell death                                                   | 0.0048 | 1.52  | Normal up vs > 5 Years Off IS Tolerant   |
| 203773_PM_x_at  | BLVRA        | biliverdin reductase A                                                                  | 0.0048 | -1.47 | Normal down vs > 5 Years Off IS Tolerant |
| 209565_PM_at    | RNF113A      | ring finger protein 113A                                                                | 0.0048 | 1.60  | Normal up vs > 5 Years Off IS Tolerant   |
| 216111_PM_x_at  | PMS2P3       | postmeiotic segregation increased 2 pseudogene 3                                        | 0.0048 | 1.54  | Normal up vs > 5 Years Off IS Tolerant   |
| 237266_PM_at    | LOC100289509 | hypothetical LOC100289509                                                               | 0.0048 | -1.25 | Normal down vs > 5 Years Off IS Tolerant |
| 213061_PM_s_at  | NTAN1        | N-terminal asparagine amidase                                                           | 0.0049 | 1.52  | Normal up vs > 5 Years Off IS Tolerant   |
| 238801_PM_at    | RBM33        | RNA binding motif protein 33                                                            | 0.0049 | -1.31 | Normal down vs > 5 Years Off IS Tolerant |
| 208941_PM_s_at  | SEPHS1       | selenophosphate synthetase 1                                                            | 0.0049 | 1.65  | Normal up vs > 5 Years Off IS Tolerant   |
| 1559735_PM_at   | ---          | ---                                                                                     | 0.0049 | -1.30 | Normal down vs > 5 Years Off IS Tolerant |
| 1556852_PM_a_at | ---          | ---                                                                                     | 0.0049 | -1.45 | Normal down vs > 5 Years Off IS Tolerant |
| 233642_PM_s_at  | HEATR5B      | HEAT repeat containing 5B                                                               | 0.0049 | 1.41  | Normal up vs > 5 Years Off IS Tolerant   |
| 221541_PM_at    | CRISPLD2     | cysteine-rich secretory protein LCCL domain containing 2                                | 0.0049 | -2.05 | Normal down vs > 5 Years Off IS Tolerant |
| 229349_PM_at    | LIN28B       | lin-28 homolog B (C. elegans)                                                           | 0.0049 | -1.70 | Normal down vs > 5 Years Off IS Tolerant |
| 212311_PM_at    | SEL1L3       | sel-1 suppressor of lin-12-like 3 (C. elegans)                                          | 0.0049 | 1.71  | Normal up vs > 5 Years Off IS Tolerant   |
| 222173_PM_s_at  | TBC1D2       | TBC1 domain family, member 2                                                            | 0.0049 | -1.87 | Normal down vs > 5 Years Off IS Tolerant |
| 1563809_PM_a_at | MCF2L        | MCF.2 cell line derived transforming sequence-like                                      | 0.0049 | -1.31 | Normal down vs > 5 Years Off IS Tolerant |
| 1560142_PM_at   | GRIK2        | glutamate receptor, ionotropic, kainate 2                                               | 0.0049 | -4.35 | Normal down vs > 5 Years Off IS Tolerant |
| 208843_PM_s_at  | GORASP2      | golgi reassembly stacking protein 2, 55kDa                                              | 0.0049 | 1.63  | Normal up vs > 5 Years Off IS Tolerant   |
| 217718_PM_s_at  | YWHAB        | tyrosine 3-monooxygenase/tryptophan 5-monooxygenase activation protein, beta polypeptid | 0.0049 | -1.17 | Normal down vs > 5 Years Off IS Tolerant |

|                |         |                                                               |        |       |                                          |
|----------------|---------|---------------------------------------------------------------|--------|-------|------------------------------------------|
| 230953_PM_at   | DNAJB3  | DnaJ (Hsp40) homolog, subfamily B, member 3                   | 0.0049 | -1.25 | Normal down vs > 5 Years Off IS Tolerant |
| 242068_PM_at   | ---     | ---                                                           | 0.0049 | 1.76  | Normal up vs > 5 Years Off IS Tolerant   |
| 210311_PM_at   | FGF5    | fibroblast growth factor 5                                    | 0.0049 | -1.70 | Normal down vs > 5 Years Off IS Tolerant |
| 236786_PM_at   | FAM135B | family with sequence similarity 135, member B                 | 0.0049 | -1.31 | Normal down vs > 5 Years Off IS Tolerant |
| 1561268_PM_at  | ---     | ---                                                           | 0.0049 | -1.58 | Normal down vs > 5 Years Off IS Tolerant |
| 214263_PM_x_at | POLR2C  | polymerase (RNA) II (DNA directed) polypeptide C, 33kDa       | 0.0049 | 1.28  | Normal up vs > 5 Years Off IS Tolerant   |
| 1554198_PM_at  | SH3YL1  | SH3 domain containing, Ysc84-like 1 ( <i>S. cerevisiae</i> )  | 0.0049 | -1.35 | Normal down vs > 5 Years Off IS Tolerant |
| 222492_PM_at   | PDXK    | pyridoxal (pyridoxine, vitamin B6) kinase                     | 0.0049 | -1.35 | Normal down vs > 5 Years Off IS Tolerant |
| 237579_PM_at   | ---     | ---                                                           | 0.0049 | 1.47  | Normal up vs > 5 Years Off IS Tolerant   |
| 220062_PM_s_at | MAGEC2  | melanoma antigen family C, 2                                  | 0.0049 | -1.37 | Normal down vs > 5 Years Off IS Tolerant |
| 202587_PM_s_at | AK1     | adenylate kinase 1                                            | 0.0049 | 1.87  | Normal up vs > 5 Years Off IS Tolerant   |
| 216757_PM_at   | ---     | ---                                                           | 0.0049 | -1.39 | Normal down vs > 5 Years Off IS Tolerant |
| 217973_PM_at   | DCXR    | dicarbonyl/L-xylulose reductase                               | 0.0049 | 1.55  | Normal up vs > 5 Years Off IS Tolerant   |
| 201506_PM_at   | TGFBI   | transforming growth factor, beta-induced, 68kDa               | 0.0049 | -1.48 | Normal down vs > 5 Years Off IS Tolerant |
| 205586_PM_x_at | VGF     | VGF nerve growth factor inducible                             | 0.0049 | -1.27 | Normal down vs > 5 Years Off IS Tolerant |
| 211667_PM_x_at | ---     | ---                                                           | 0.0049 | 1.31  | Normal up vs > 5 Years Off IS Tolerant   |
| 207900_PM_at   | CCL17   | chemokine (C-C motif) ligand 17                               | 0.0049 | -1.25 | Normal down vs > 5 Years Off IS Tolerant |
| 239411_PM_at   | ---     | ---                                                           | 0.0049 | 1.51  | Normal up vs > 5 Years Off IS Tolerant   |
| 209308_PM_s_at | BNIP2   | BCL2/adenovirus E1B 19kDa interacting protein 2               | 0.0049 | 1.49  | Normal up vs > 5 Years Off IS Tolerant   |
| 240662_PM_at   | ---     | ---                                                           | 0.0049 | -2.34 | Normal down vs > 5 Years Off IS Tolerant |
| 222101_PM_s_at | DCHS1   | dachsous 1 ( <i>Drosophila</i> )                              | 0.0049 | 1.84  | Normal up vs > 5 Years Off IS Tolerant   |
| 236407_PM_at   | KCNE1   | potassium voltage-gated channel, Isk-related family, member 1 | 0.0049 | -1.29 | Normal down vs > 5 Years Off IS Tolerant |
| 1561668_PM_at  | ---     | ---                                                           | 0.0049 | -1.87 | Normal down vs > 5 Years Off IS Tolerant |

|                 |              |                                                          |        |       |                                          |
|-----------------|--------------|----------------------------------------------------------|--------|-------|------------------------------------------|
| 205058_PM_at    | SLC26A1      | solute carrier family 26 (sulfate transporter), member 1 | 0.0049 | -1.32 | Normal down vs > 5 Years Off IS Tolerant |
| 236894_PM_at    | L1TD1        | LINE-1 type transposase domain containing 1              | 0.0049 | -1.40 | Normal down vs > 5 Years Off IS Tolerant |
| 243954_PM_at    | LOC285286    | hypothetical LOC285286                                   | 0.0049 | -1.69 | Normal down vs > 5 Years Off IS Tolerant |
| 201690_PM_s_at  | TPD52        | tumor protein D52                                        | 0.0049 | 1.79  | Normal up vs > 5 Years Off IS Tolerant   |
| 224042_PM_at    | UPB1         | ureidopropionase, beta                                   | 0.0049 | -1.35 | Normal down vs > 5 Years Off IS Tolerant |
| 239066_PM_at    | LOC100506966 | hypothetical LOC100506966                                | 0.0049 | -1.56 | Normal down vs > 5 Years Off IS Tolerant |
| 242687_PM_at    | FAM160A1     | family with sequence similarity 160, member A1           | 0.0049 | -1.34 | Normal down vs > 5 Years Off IS Tolerant |
| 1559960_PM_x_at | SYCE1L       | synaptonemal complex central element protein 1-like      | 0.0049 | 1.37  | Normal up vs > 5 Years Off IS Tolerant   |
| 204272_PM_at    | LGALS4       | lectin, galactoside-binding, soluble, 4                  | 0.0049 | 1.30  | Normal up vs > 5 Years Off IS Tolerant   |
| 214736_PM_s_at  | ADD1         | adducin 1 (alpha)                                        | 0.0049 | 1.31  | Normal up vs > 5 Years Off IS Tolerant   |
| 240885_PM_at    | ---          | ---                                                      | 0.0049 | -1.39 | Normal down vs > 5 Years Off IS Tolerant |
| 227456_PM_s_at  | C6orf136     | chromosome 6 open reading frame 136                      | 0.0049 | 1.38  | Normal up vs > 5 Years Off IS Tolerant   |
| 222102_PM_at    | GSTA3        | glutathione S-transferase alpha 3                        | 0.0049 | -1.32 | Normal down vs > 5 Years Off IS Tolerant |
| 244350_PM_at    | MYO10        | myosin X                                                 | 0.0049 | -1.35 | Normal down vs > 5 Years Off IS Tolerant |
| 236998_PM_at    | CCDC56       | Coiled-coil domain containing 56                         | 0.0049 | -1.32 | Normal down vs > 5 Years Off IS Tolerant |
| 213990_PM_s_at  | PAK7         | p21 protein (Cdc42/Rac)-activated kinase 7               | 0.0049 | -1.30 | Normal down vs > 5 Years Off IS Tolerant |
| 204526_PM_s_at  | TBC1D8       | TBC1 domain family, member 8 (with GRAM domain)          | 0.0049 | -1.70 | Normal down vs > 5 Years Off IS Tolerant |
| 225695_PM_at    | C2orf18      | chromosome 2 open reading frame 18                       | 0.0050 | -1.42 | Normal down vs > 5 Years Off IS Tolerant |
| 200829_PM_x_at  | ZNF207       | zinc finger protein 207                                  | 0.0050 | 1.22  | Normal up vs > 5 Years Off IS Tolerant   |
| 1557673_PM_at   | ---          | ---                                                      | 0.0050 | -1.53 | Normal down vs > 5 Years Off IS Tolerant |
| 230787_PM_at    | LOC100505481 | hypothetical LOC100505481                                | 0.0050 | 1.70  | Normal up vs > 5 Years Off IS Tolerant   |
| 1562953_PM_s_at | NCRNA00247   | non-protein coding RNA 247                               | 0.0050 | -1.28 | Normal down vs > 5 Years Off IS Tolerant |
| 242503_PM_at    | CHST13       | Carbohydrate (chondroitin 4) sulfotransferase 13         | 0.0050 | -1.31 | Normal down vs > 5 Years Off IS Tolerant |

|                 |              |                                        |        |       |                                          |
|-----------------|--------------|----------------------------------------|--------|-------|------------------------------------------|
| 243058_PM_at    | ---          | ---                                    | 0.0050 | -1.36 | Normal down vs > 5 Years Off IS Tolerant |
| 226818_PM_at    | MPEG1        | Macrophage expressed 1                 | 0.0050 | -1.41 | Normal down vs > 5 Years Off IS Tolerant |
| 235938_PM_at    | ---          | ---                                    | 0.0050 | -1.26 | Normal down vs > 5 Years Off IS Tolerant |
| 1560934_PM_at   | LOC284669    | hypothetical protein LOC284669         | 0.0050 | -1.30 | Normal down vs > 5 Years Off IS Tolerant |
| 228049_PM_x_at  | LOC100507303 | hypothetical LOC100507303              | 0.0050 | 1.94  | Normal up vs > 5 Years Off IS Tolerant   |
| 218441_PM_s_at  | RPAP1        | RNA polymerase II associated protein 1 | 0.0050 | 1.39  | Normal up vs > 5 Years Off IS Tolerant   |
| 1557818_PM_x_at | LOC100131941 | Hypothetical LOC100131941              | 0.0050 | -1.68 | Normal down vs > 5 Years Off IS Tolerant |
| 223644_PM_s_at  | CRYGS        | crystallin, gamma S                    | 0.0050 | 1.65  | Normal up vs > 5 Years Off IS Tolerant   |

**Supplementary Table S7: Canonical pathways for the 4529 genes unique to the Tol group compared to the non-Tol group at Years 5 + 6**

| Canonical Pathways                     | (B-H p-value) | Ratio    | Downregulated | No change  | Upregulated | Molecules                                                                                                                                                                                                                                                                                                                                                                                                                                                    |
|----------------------------------------|---------------|----------|---------------|------------|-------------|--------------------------------------------------------------------------------------------------------------------------------------------------------------------------------------------------------------------------------------------------------------------------------------------------------------------------------------------------------------------------------------------------------------------------------------------------------------|
| Glucocorticoid Receptor Signaling      | 4.7863E-06    | 2.84E-01 | 57/250 (23%)  | 0/250 (0%) | 14/250 (6%) | POU2F1,KAT2B,HSPA1L,NFATC2,JAK3,PIK3R5,SMARCA4,PRKACB,NFKBIA,POLR2K,MED14,SMAD3,TGFBR1,POLR2I,MAPK9,TRAF6,ERCC3,NCOA1,CCL5,IL1B,SMAD2,MED1,MAPK12,JAK1,PIK3C2B,POLR2C,TAT,TAF7,TGFBR2,PPP3R1,POLR2D,CD163,CXCL3,STAT5B,GTF2H1,IKBKE,JUN,MAPK14,AKT3,GTF2H3,TAF4B,SMARCA2,TAF3,TAF9B,HSPA14,PPP3CC,NCOA3,VCAM1,TSC22D3,PIK3CA,TNF,STAT1,GRB2,CREBBP,NCOR1,HSP90AA1,NPPA,NFATC4,CDK7,RRAS2,ATM,MNAT1,MAP3K14,AKT2,NFATC3,HSPA4,BCL2,TAF10,HSP90AB1,CD247,ICAM1 |
| CD28 Signaling in T Helper Cells       | 0.00066069    | 3.15E-01 | 29/111 (26%)  | 0/111 (0%) | 6/111 (5%)  | JUN,ITPR2,AKT3,ACTR2,NFATC2,PIK3R5,ARPC5L,NFKBIA,PPP3CC,MALT1,CARD11,FYN,PIK3CA,BCL10,PTPN11,LCK,ITK,GRB2,CD80,ITPR1,LAT,MAPK9,ZAP70,NFATC4,ATM,MAPK12,PIK3C2B,ACTR3,AKT2,NFATC3,PPP3R1,ITPR3,PLCG1,CD247,IKBKE                                                                                                                                                                                                                                              |
| p53 Signaling                          | 0.00066069    | 3.3E-01  | 24/94 (26%)   | 0/94 (0%)  | 7/94 (7%)   | JUN,KAT2B,MAPK14,PML,AKT3,APAF1,CCNG1,PIK3R5,GADD45B,THBS1,GNL3,PIK3CA,ATR,PIDD1,MDM4,CCND2,ATM,MED1,BIRC5,CDK2,PIK3C2B,ST13,AKT2,BAI1,CNK, BCL2,PPP1R13B,MDM2,FAS,HIPK2,CHEK1                                                                                                                                                                                                                                                                               |
| EIF2 Signaling                         | 0.00125893    | 2.72E-01 | 42/169 (25%)  | 0/169 (0%) | 4/169 (2%)  | RPS27L,UBA52,AKT3,RPS10,RPL32,PIK3R5,RPL35A,EIF3B,RPS5,RPS20,PIK3CA,RPL21,RPL37,RPS11,GRB2,RPL31,RPL3,AGO2,RPL14,RPL30,RPS25,EIF1AX,RRAS2,RPS18,ATM,INSR,PIK3C2B,RPS2,FAU,RPL13,AKT2,RPS19,AGO4,RPS16,EIF2S3,RPL24,RPL18,RPS17,EIF2A,RPL36,PAIP1,RPL34,RPL15,EIF2AK3,RPS15,RPL10A                                                                                                                                                                            |
| Regulation of IL-2 Expression          | 0.0060256     | 3.21E-01 | 21/78 (27%)   | 0/78 (0%)  | 4/78 (5%)   | JUN,NFATC2,NFKBIA,PPP3CC,MALT1,CARD11,FYN,BCL10,SMAD3,GRB2,CD80,TGFBR1,LAT,MAPK9,ZAP70,NFATC4,RRAS2,SMAD2,MAPK12,NFATC3,TGFBR2,PPP3R1,PLCG1,CD247,IKBKE                                                                                                                                                                                                                                                                                                      |
| Inhibition of Angiogenesis by TSP1     | 0.00724436    | 4.24E-01 | 8/33 (24%)    | 0/33 (0%)  | 6/33 (18%)  | JUN,MAPK14,AKT3,GUCY1A2,MAPK12,GUCY1A3,THBS1,AKT2,SDC1,CD36,TGFBR2,FYN,TGFBR1,MAPK9                                                                                                                                                                                                                                                                                                                                                                          |
| iCOS-iCOSL Signaling in T Helper Cells | 0.01023293    | 2.84E-01 | 26/102 (25%)  | 0/102 (0%) | 3/102 (3%)  | CAMK2B,ITPR2,AKT3,NFATC2,PIK3R5,IL2RB,NFKBIA,PPP3CC,PIK3CA,LCK,ITK,PLEKHA1,GRB2,CD80,ITPR1,LAT,ZAP70,NFATC4,ATM,ICOSLG/LOC102723996,PIK3C2B,AKT2,BAD,NFATC3,PPP3R1,ITPR3,PLCG1,CD247,IKBKE                                                                                                                                                                                                                                                                   |
| HGF Signaling                          | 0.01023293    | 2.84E-01 | 21/102 (21%)  | 0/102 (0%) | 8/102 (8%)  | JUN,AKT3,PIK3R5,ELF2,GAB1,MAP3K13,PIK3CA,PTPN11,ITGB1,GRB2,PRKCH,RAPGEF1,MAP3K3,MAPK9,RRAS2,PRKD3,CRKL,ATM,MAPK12,MAP3K14,CDK2,PIK3C2B,PTK2,AKT2,MAP3K9,MAP3K2,RAP1B,PLCG1,HGF                                                                                                                                                                                                                                                                               |
| PKCθ Signaling in T Lymphocytes        | 0.01023293    | 2.77E-01 | 26/112 (23%)  | 0/112 (0%) | 5/112 (4%)  | JUN,CAMK2B,POU2F1,NFATC2,PIK3R5,NFKBIA,MAP3K13,PPP3CC,MALT1,CARD11,FYN,PIK3CA,BCL10,LCK,GRB2,CD80,LAT,MAP3K3,ZAP70,NFATC4,RRAS2,ATM,MAP3K14,PIK3C2B,MAP3K9,NFATC3,PPP3R1,MAP3K2,PLCG1,CD247,IKBKE                                                                                                                                                                                                                                                            |
| Protein Ubiquitination Pathway         | 0.01071519    | 2.29E-01 | 47/245 (19%)  | 0/245 (0%) | 9/245 (4%)  | HSPA1L,UBE2E3,USP11,SMURF2,USP7,BIRC3,ANAPC1,DNAJB2,ANAPC5,USP1,USP46,FBXW7,DNAJC9,STUB1,DNAJB14,USP32,TRAF6,PSMA4,UBE2G2,UBE2G1,PSMC2,USP51,UBE2D4,USP9X,NEDD4L,USP47,DNAJA1,USP54,DNAJC4,HSPA14,HSPE1,USP8,DNAJC27,SKP1,USP24,USP45,USP20,HSP90AA1,HSPB11,UBE2F,UBR1,UBE2N,B2M,UBE2D3,UBE3A,HSPA4,UBE2B,USP34,UBE2D2,USP12,DNAJB8,DNAJB4,UBE2Q1,MDM2,HSP90AB1,BAP1                                                                                         |
| Estrogen Receptor Signaling            | 0.01071519    | 2.66E-01 | 27/124 (22%)  | 0/124 (0%) | 6/124 (5%)  | KAT2B,GTF2H3,G6PC3,TAF4B,TAF3,SMARCA4,TAF9B,RBFOX2,POLR2K,NCOA3,MED14,GRB2,CREBBP,ESR2,MED10,NCOR1,POLR2I,ERCC3,CTBP1,MED13L,CDK7,RRAS2,NCOA1,MED1,MNAT1,MED17,POLR2C,HDAC3,TAF7,SPEN,POLR2D,TAF10,GTF2H1                                                                                                                                                                                                                                                    |

|                                                   |            |          |              |            |              |                                                                                                                                                                                                                                                                         |
|---------------------------------------------------|------------|----------|--------------|------------|--------------|-------------------------------------------------------------------------------------------------------------------------------------------------------------------------------------------------------------------------------------------------------------------------|
| Lymphotoxin $\beta$ Receptor Signaling            | 0.01071519 | 3.4E-01  | 14/53 (26%)  | 0/53 (0%)  | 4/53 (8%)    | AKT3,APAF1,ATM,MAP3K14,LTBR,PIK3R5,PIK3C2B,CYCS,NFKBIA,AKT2,VCAM1,TRAF5,PIK3CA,RELB,CREBBP,TRAF4,IKBKE,TRAF6                                                                                                                                                            |
| PPAR $\alpha$ /RXR $\alpha$ Activation            | 0.01348963 | 2.44E-01 | 27/168 (16%) | 0/168 (0%) | 14/168 (8%)  | JUN,ACADL,MAPK14,GNA11,PRKACB,NFKBIA,NR2C2,NCOA3,CYP2C18,SMAD3,IL1RAPL2,GRB2,CREBBP,TGFBR1,NCOR1,HSP90AA1,PRKAR2A,TRAF6,PLCB1,SLC27A1,RRAS2,IL1B,SMAD2,MED1,PLCB4,ABCA1,MAP3K14,INSR,CPT1B,BMPR2,TGS1,CD36,TGFBR2,GNAS,PDIA3,PLCG1,PLCL2,HSP90AB1,STAT5B,ACVR1,IKBKE    |
| B Cell Receptor Signaling                         | 0.01348963 | 2.44E-01 | 30/168 (18%) | 0/168 (0%) | 11/168 (7%)  | JUN,CAMK2B,MAPK14,AKT3,NFATC2,PIK3R5,GAB1,NFKBIA,MAP3K13,PPP3CC,MAL T1,INPP5B,PIK3CA,BCL10,PTPN11,INPP5K,GRB2,APBB1IP,CREBBP,SYNJ2,FOXO1,MAP3K3,MAPK9,NFATC4,TCF3,RRAS2,ATM,MAPK12,MAP3K14,PIK3C2B,PTK2,AKT2,BAD,CFL2,MAP3K9,NFATC3,PPP3R1,MAP3K2,EBF1,RAP1B,IKBKE      |
| Role of NFAT in Cardiac Hypertrophy               | 0.01380384 | 2.41E-01 | 30/174 (17%) | 0/174 (0%) | 12/174 (7%)  | CAMK2B,ITPR2,MAPK14,AKT3,RCAN3,SLC8A1,PIK3R5,PRKACB,PPP3CC,PIK3CA,GN G4,GRB2,ITPR1,TGFBR1,PRKCH,MAPK9,PRKAR2A,PLCB1,NFATC4,HDAC5,RRAS2,GNB2L1,PRKD3,ATM,MAPK12,PLCB4,PIK3C2B,CAMK1D,HDAC3,AKT2,IL6ST,GNB1L,TGFBR2,SLC8A2,GNAS,PPP3R1,ITPR3,GNB5,PDIA3,PLCG1,GN G2,PLCL2 |
| Gaq Signaling                                     | 0.01584893 | 2.5E-01  | 25/144 (17%) | 0/144 (0%) | 11/144 (8%)  | RHOH,ITPR2,GNA11,AKT3,NFATC2,PIK3R5,PLD1,NFKBIA,PPP3CC,PIK3CA,GN G4,ITPR1,PRKCH,AVPR1A,HTR2A,FNBP1,PLCB1,NFATC4,GNB2L1,PRKD3,ATM,PLCB4,PIK3C2B,AKT2,NFATC3,GNB1L,ADRBK1,GNAS,PPP3R1,ITPR3,GNB5,PLCG1,GN G2,RHOF,AVPR1B,IKBKE                                            |
| IL-15 Signaling                                   | 0.01584893 | 3.08E-01 | 16/65 (25%)  | 0/65 (0%)  | 4/65 (6%)    | IL15,MAPK14,AKT3,RRAS2,MAPK12,ATM,JAK3,PIK3R5,IL2RB,PIK3C2B,JAK1,PTK2,AKT2,VCAM1,PIK3CA,TNF,BCL2,LCK,PLCG1,STAT5B                                                                                                                                                       |
| fMLP Signaling in Neutrophils                     | 0.01659587 | 2.67E-01 | 20/105 (19%) | 0/105 (0%) | 8/105 (8%)   | ITPR2,ACTR2,NFATC2,PIK3R5,ARPC5L,NFKBIA,PPP3CC,PIK3CA,GN G4,ITPR1,PRKCH,PLCB1,NFATC4,RRAS2,GNB2L1,PRKD3,ATM,PLCB4,PIK3C2B,ACTR3,NFATC3,GNB1L,GNAS,PPP3R1,ITPR3,GNB5,GN G2,CYBB                                                                                          |
| Role of NFAT in Regulation of the Immune Response | 0.01659587 | 2.41E-01 | 31/162 (19%) | 0/162 (0%) | 8/162 (5%)   | JUN,ITPR2,GNA11,AKT3,NFATC2,RCAN3,PIK3R5,NFKBIA,PPP3CC,MS4A2,FYN,PIK3CA,LCK,GN G4,ITK,CSNK1G3,GRB2,CD80,ITPR1,LAT,ZAP70,PLCB1,NFATC4,RRAS2,GNB2L1,ATM,PLCB4,PIK3C2B,AKT2,NFATC3,GNB1L,GNAS,PPP3R1,ITPR3,GNB5,PLCG1,GN G2,CD247,IKBKE                                    |
| Tec Kinase Signaling                              | 0.01737801 | 2.43E-01 | 27/152 (18%) | 0/152 (0%) | 10/152 (7%)  | RHOH,GNA11,JAK3,PIK3R5,TNFRSF25,PAK7,MS4A2,FYN,PIK3CA,ACTG1,STAT1,AC TB,TNF,LCK,GN G4,ITGB1,ITK,PRKCH,MAPK9,FNBP1,STAT4,GNB2L1,PRKD3,ATM,MAPK12,JAK1,PIK3C2B,PTK2,TXK,GNB1L,GNAS,GNB5,PLCG1,GN G2,FAS,STAT5B,RHOF                                                       |
| RANK Signaling in Osteoclasts                     | 0.01737801 | 2.79E-01 | 19/86 (22%)  | 0/86 (0%)  | 5/86 (6%)    | JUN,MAPK14,AKT3,NFATC2,MAPK12,ATM,MAP3K14,PIK3R5,PIK3C2B,TAB2,NFKBIA,AKT2,MAP3K13,PPP3CC,MAP3K9,TRAF5,BIRC3,PIK3CA,PPP3R1,MAP3K2,MAP3K3,MAPK9,IKBKE,TRAF6                                                                                                               |
| T Cell Receptor Signaling                         | 0.01737801 | 2.71E-01 | 24/96 (25%)  | 0/96 (0%)  | 2/96 (2%)    | JUN,NFATC2,PIK3R5,NFKBIA,PPP3CC,RASGRP1,MALT1,CARD11,FYN,PIK3CA,BCL10,LCK,ITK,GRB2,LAT,ZAP70,NFATC4,RRAS2,ATM,PIK3C2B,TXK,NFATC3,PPP3R1,PLCG1,CD247,IKBKE                                                                                                               |
| UVA-Induced MAPK Signaling                        | 0.01905461 | 2.76E-01 | 18/87 (21%)  | 0/87 (0%)  | 6/87 (7%)    | JUN,PLCB1,MAPK14,RRAS2,MAPK12,PLCB4,ATM,SMPD1,PIK3R5,PIK3C2B,PARP8,CYCS,PARP6,PARP10,TIPARP,RPS6KA5,PIK3CA,STAT1,TNKS2,PDIA3,PLCG1,PLCL2,SMPD4,MAPK9                                                                                                                    |
| Leptin Signaling in Obesity                       | 0.01949845 | 2.88E-01 | 15/73 (21%)  | 0/73 (0%)  | 6/73 (8%)    | PLCB1,AKT3,SOCS3,PLCB4,PDE3B,ATM,PIK3R5,PIK3C2B,LEPR,PRKACB,AKT2,GHRL,GNAS,PIK3CA,PTPN11,GRB2,PDIA3,PLCG1,PLCL2,FOXO1,PRKAR2A                                                                                                                                           |
| Ephrin Receptor Signaling                         | 0.01949845 | 2.34E-01 | 20/171 (12%) | 0/171 (0%) | 20/171 (12%) | ARHGEF15,GNA11,AKT3,ACTR2,EPHA3,ARPC5L,RGS3,PAK7,GRIN2C,GRIN3B,CXCR4,FYN,PTPN11,GN G4,ITGB1,GRB2,EPHA5,CREBBP,RAPGEF1,VEGFB,NCK1,EFNB1,EPHB6,RRAS2,GNB2L1,CRKL,MAP3K14,EPHB2,EPHA7,PTK2,ACTR3,AKT2,CFL2,GNB1L,PROK1,GNAS,ACP1,GNB5,RAP1B,GN G2                          |

|                                                   |            |          |              |            |              |                                                                                                                                                                                                                                                                                                                                                                                                                                                                      |
|---------------------------------------------------|------------|----------|--------------|------------|--------------|----------------------------------------------------------------------------------------------------------------------------------------------------------------------------------------------------------------------------------------------------------------------------------------------------------------------------------------------------------------------------------------------------------------------------------------------------------------------|
| ATM Signaling                                     | 0.01949845 | 3.05E-01 | 14/59 (24%)  | 0/59 (0%)  | 4/59 (7%)    | JUN,MAPK14,TLK2,MAPK12,ATM,CDK2,TLK1,GADD45B,TDP1,NFKBIA,SMC3,FANCD2,CREBBP,MDM2,MRE11A,MAPK9,CHEK1,MDM4                                                                                                                                                                                                                                                                                                                                                             |
| Dendritic Cell Maturation                         | 0.01949845 | 2.39E-01 | 26/155 (17%) | 0/155 (0%) | 11/155 (7%)  | CCR7,IL15,MAPK14,IL12A,AKT3,PIK3R5,LEPR,NFKBIA,CD83,PIK3CA,STAT1,RELB,TNF,CD80,CREBBP,TLR2,MAPK9,TRAF6,PLCB1,STAT4,IL1B,ATM,MAPK12,PLCB4,COL3A1,LTBR,MAP3K14,COL1A2,PIK3C2B,B2M,AKT2,IL1A,PDIA3,PLCG1,PLCL2,ICAM1,IKBKE                                                                                                                                                                                                                                              |
| Phospholipase C Signaling                         | 0.02089296 | 2.21E-01 | 36/222 (16%) | 0/222 (0%) | 13/222 (6%)  | PEBP1,ITPR2,NFATC2,PLD1,MPRIP,LCK,GNG4,ITPR1,LAT,PRKCH,PLA2G4A,ZAP70,HDAC5,PRKD3,PLCB4,HDAC3,GNB1L,PPP3R1,GNB5,MYL3,RAP1B,ARHGEF9,PLA2G2D,ARHGEF11,ARHGEF15,RHOH,PPP1R14A,PPP3CC,FYN,ARHGEF7,ITGB1,ITK,GRB2,CREBBP,ARHGEF18,FNBP1,PLCB1,NFATC4,RRAS2,GNB2L1,MYL12A,NFATC3,GNAS,ITPR3,PLA2G12A,PLCG1,GNG2,CD247,RHOF                                                                                                                                                  |
| HIF1α Signaling                                   | 0.02089296 | 2.63E-01 | 15/99 (15%)  | 0/99 (0%)  | 11/99 (11%)  | JUN,MAPK14,AKT3,MMP2,PIK3R5,P4HTM,PIK3CA,ARNT,CREBBP,VEGFB,HSP90AA1,MMP28,MAPK9,NAA10,MMP11,RRAS2,NCOA1,ATM,MAPK12,PIK3C2B,AKT2,MMP7,PROK1,MDM2,MMP24,MMP14                                                                                                                                                                                                                                                                                                          |
| Angiopoietin Signaling                            | 0.02238721 | 2.92E-01 | 15/65 (23%)  | 0/65 (0%)  | 4/65 (6%)    | AKT3,RRAS2,ATM,BIRC5,PIK3R5,PIK3C2B,PTK2,NFKBIA,AKT2,PAK7,BAD,PIK3CA,PTPN11,GRB2,TNIP1,STAT5B,NCK1,FOXO1,IKBKE                                                                                                                                                                                                                                                                                                                                                       |
| IL-3 Signaling                                    | 0.02290868 | 2.86E-01 | 17/70 (24%)  | 0/70 (0%)  | 3/70 (4%)    | JUN,AKT3,RRAS2,CRKL,PRKD3,ATM,PIK3R5,PIK3C2B,JAK1,AKT2,PPP3CC,BAD,PIK3CA,PPP3R1,STAT1,GRB2,PRKCH,RAPGEF1,STAT5B,FOXO1                                                                                                                                                                                                                                                                                                                                                |
| NF-κB Signaling                                   | 0.02511886 | 2.32E-01 | 30/164 (18%) | 0/164 (0%) | 8/164 (5%)   | AKT3,PIK3R5,TAB2,PRKACB,NFKBIA,PELI1,MALT1,CARD11,PIK3CA,BCL10,RELB,TNF,LCK,CREBBP,TGFBR1,NTRK2,TLR2,MAP3K3,ZAP70,TRAF6,SIGIRR,TANK,TNFSF13B,TAB3,RRAS2,IL1B,ATM,LTBR,MAP3K14,UBE2N,INSR,PIK3C2B,AKT2,TRAF5,BMPR2,TGFBR2,IL1A,TNIP1                                                                                                                                                                                                                                  |
| Thrombin Signaling                                | 0.02511886 | 2.26E-01 | 27/186 (15%) | 0/186 (0%) | 15/186 (8%)  | CAMK2B,GATA2,RHOH,ARHGEF11,ARHGEF15,ITPR2,MAPK14,GNA11,AKT3,PIK3R5,MPRIPI,PIK3CA,GNG4,GRB2,ITPR1,PRKCH,F2,FNBP1,PLCB1,RRAS2,F2RL2,GNB2L1,PRKD3,ATM,MAPK12,PLCB4,MYL12A,PIK3C2B,CAMK1D,PTK2,AKT2,GNB1L,GNAS,ITPR3,GNB5,MYL3,PDIA3,PLCG1,GNG2,PLCL2,ARHGEF9,RHOF                                                                                                                                                                                                       |
| Leukocyte Extravasation Signaling                 | 0.02511886 | 2.24E-01 | 22/192 (11%) | 0/192 (0%) | 21/192 (11%) | RHOH,MAPK14,MMP2,CLDN8,PIK3R5,ITGB2,RASGRP1,VCAM1,CXCR4,PIK3CA,ACTG1,ACTB,PTPN11,ITGB1,ITK,PRKCH,MMP28,MAPK9,CTNNA1,JAM2,MMP11,PRKD3,CRKL,VASP,ATM,MAPK12,EZR,CLDN18,ITGA6,ARHGAP35,PIK3C2B,CTNNA3,PTK2,TXK,MMP7,TIMP3,RAP1B,ARHGAP4,PLCG1,ICAM1,CYBB,MMP24,MMP14                                                                                                                                                                                                    |
| Protein Kinase A Signaling                        | 0.02570396 | 2.01E-01 | 49/364 (13%) | 0/364 (0%) | 24/364 (7%)  | CAMK2B,ITPR2,ADD1,NFATC2,DUSP26,PRKACB,NFKBIA,ANAPC1,ANAPC5,DUSP18,SMAD3,GNG4,ITPR1,TGFBR1,PRKCH,AKAP1,DUSP16,PRKAR2A,PTPN14,PTPRM,PRKD3,LEF1,PLCB4,PTK2,DUSP2,BAD,PTPN1,ADD3,GNB1L,TGFBR2,ACP1,PPP3R1,GNB5,PTPRG,MYL3,RAP1B,PDIA3,FLNB,YWHAQ,PPP1R14A,PHKA2,DUSP11,PDE3B,PTPN22,PPP3CC,PTPN4,PPP1R3D,HIST1H1C,PDE11A,PDE7A,PTPN11,DCC,CREBBP,SIRPA,YWHAB,AKAP6,PLCB1,NFATC4,PTPN9,TCF3,GNB2L1,VASP,PDE1B,MYL12A,NFATC3,PDE8A,GNAS,ITPR3,PLCG1,GNG2,PLCL2,TTN,CDC25B |
| Aryl Hydrocarbon Receptor Signaling               | 0.02630268 | 2.41E-01 | 19/133 (14%) | 0/133 (0%) | 13/133 (10%) | JUN,RARA,APAF1,RBL2,MCM7,SMARCA4,NCOA3,ALDH1A2,TNF,ATR,ARNT,ESR2,ALDH1B1,CDK6,HSP90AA1,CYP1B1,MGST3,GSTA3,CCND2,IL1B,ATM,ALDH7A1,MED1,CDK2,ALDH18A1,ALDH4A1,IL1A,MDM2,FAS,HSP90AB1,CHEK1,NFE2L2                                                                                                                                                                                                                                                                      |
| Ketolysis                                         | 0.02691535 | 6.25E-01 | 3/8 (38%)    | 0/8 (0%)   | 2/8 (25%)    | ACAT2,BDH1,ACAT1,OXCT1,BDH2                                                                                                                                                                                                                                                                                                                                                                                                                                          |
| Cell Cycle: G2/M DNA Damage Checkpoint Regulation | 0.03090295 | 3.06E-01 | 12/49 (24%)  | 0/49 (0%)  | 3/49 (6%)    | KAT2B,YWHAQ,PPM1D,CDK7,AURKA,PTPMT1,ATM,SKP1,ATR,MDM2,HIPK2,YWHAB,CHEK1,CDC25B,MDM4                                                                                                                                                                                                                                                                                                                                                                                  |

|                                                                           |            |          |              |            |             |                                                                                                                                                                                                                                                                                                                                                                   |
|---------------------------------------------------------------------------|------------|----------|--------------|------------|-------------|-------------------------------------------------------------------------------------------------------------------------------------------------------------------------------------------------------------------------------------------------------------------------------------------------------------------------------------------------------------------|
| CREB Signaling in Neurons                                                 | 0.03090295 | 2.26E-01 | 24/168 (14%) | 0/168 (0%) | 14/168 (8%) | CAMK2B,ITPR2,GNA11,AKT3,PIK3R5,PRKACB,GRIN2C,POLR2K,PIK3CA,GNG4,GRI A2,GRB2,CREBBP,ITPR1,PRKCH,POLR2I,GRM8,PRKAR2A,PLCB1,GRIK5,RRAS2,G NB2L1,PRKD3,GRIK2,ATM,PLCB4,PIK3C2B,POLR2C,AKT2,GNB1L,GNAS,ITPR3,POL R2D,GNB5,PDIA3,PLCG1,GNG2,PLCL2                                                                                                                       |
| B Cell Activating Factor Signaling                                        | 0.03090295 | 3.25E-01 | 9/40 (23%)   | 0/40 (0%)  | 4/40 (10%)  | JUN,NFATC4,MAPK14,TNFSF13B,NFATC2,MAPK12,MAP3K14,NFKBIA,TRAF5,NFAT C3,MAPK9,IKBKE,TRAF6                                                                                                                                                                                                                                                                           |
| Role of Osteoblasts, Osteoclasts and Chondrocytes in Rheumatoid Arthritis | 0.03090295 | 2.16E-01 | 30/213 (14%) | 0/213 (0%) | 16/213 (8%) | JUN,MAPK14,AKT3,NFATC2,FZD2,PIK3R5,TAB2,NFKBIA,PPP3CC,BIRC3,APC,WNT8 B,PIK3CA,ADAMTS5,TNF,ITGB1,IL1RAPL2,BMP6,FOXO1,MAPK9,BMP7,TRAF6,NFAT C4,TCF3,IL1B,WNT7B,ATM,MAPK12,LEF1,MAP3K14,PIK3C2B,AKT2,DVL1,BAD,TRA F5,NFATC3,BMPR2,NAIP,PPP3R1,BCL2,BMP1,IL1A,FRZB,APC2,MMP14,IKBKE                                                                                   |
| 1D-myo-inositol Hexakisphosphate Biosynthesis II (Mammalian)              | 0.03090295 | 4.21E-01 | 6/19 (32%)   | 0/19 (0%)  | 2/19 (11%)  | ITPK1,INPP5B,ITPKB,INPP5E,INPP5K,SYNJ2,SEC16A,INPP5A                                                                                                                                                                                                                                                                                                              |
| 3-phosphoinositide Degradation                                            | 0.03090295 | 2.35E-01 | 22/136 (16%) | 0/136 (0%) | 10/136 (7%) | NUDT3,PPP1R14A,SOCS3,PPFIA2,ATP1A1,DUSP11,PTPN22,ILKAP,INPP5B,DUSP1 4,TNS3,PTPN11,INPP5E,INPP5K,SYNJ2,SIRPA,DUSP16,MTMR1,PTPRM,PTPMT1,DU SP2,PTPN1,ITPK1,STYX,ACP1,TMEM55B,UBLCP1,EYA4,NUDT4,PPP1R13B,CDC25B ,PGAM5                                                                                                                                               |
| Xenobiotic Metabolism Signaling                                           | 0.03235937 | 2.1E-01  | 29/248 (12%) | 0/248 (0%) | 23/248 (9%) | GAL3ST2,CAMK2B,CYP3A7,PIK3R5,SCAND1,ANKRA2,ARNT,PRKCH,ALDH1B1,CYP 1B1,ABCC3,MGST3,MAPK9,CHST2,HDAC5,GSTA3,NCOA1,IL1B,PRKD3,ALDH7A1,M ED1,MAPK12,PIK3C2B,ALDH18A1,CAMK1D,MAF,CYP3A5,IL1A,MAPK14,CHST13,IL4I 1,MAP3K13,ALDH1A2,PIK3CA,TNF,CREBBP,HSP90AA1,MAP3K3,HS3ST3B1,HS2ST1 ,RRAS2,ATM,MAP3K14,CES1,PPP2R2A,MAP3K9,ALDH4A1,MAP3K2,FTL,HSP90AB1, EIF2AK3,NFE2L2 |
| Reelin Signaling in Neurons                                               | 0.03235937 | 2.66E-01 | 16/79 (20%)  | 0/79 (0%)  | 5/79 (6%)   | ARHGEF15,ARHGEF11,CRKL,MAPK12,ATM,ITGA6,MAP4K1,PIK3R5,PIK3C2B,ITGB2, LRP8,MAP3K9,FYN,CDK5R1,PIK3CA,ITGB1,LCK,ARHGEF9,PAFAH1B3,APBB1,MAP K9                                                                                                                                                                                                                        |
| Fc Epsilon RI Signaling                                                   | 0.03235937 | 2.48E-01 | 17/105 (16%) | 0/105 (0%) | 9/105 (9%)  | PLA2G2D,MAPK14,AKT3,PIK3R5,GAB1,MS4A2,FYN,INPP5B,PIK3CA,PTPN11,TNF,IN PP5K,GRB2,SYNJ2,LAT,PRKCH,PLA2G4A,MAPK9,RRAS2,PRKD3,ATM,MAPK12,PIK 3C2B,AKT2,PLA2G12A,PLCG1                                                                                                                                                                                                 |
| NGF Signaling                                                             | 0.03235937 | 2.48E-01 | 19/105 (18%) | 0/105 (0%) | 7/105 (7%)  | AKT3,PIK3R5,GAB1,MAP3K13,RPS6KA5,PIK3CA,PTPN11,GRB2,CREBBP,TRAF4,MA P3K3,MAPK9,TRAF6,RRAS2,ATM,MAPK12,SMPD1,MAP3K14,PIK3C2B,AKT2,MAP3K 9,MAP3K2,RAP1B,PLCG1,SMPD4,IKBKE                                                                                                                                                                                           |
| eNOS Signaling                                                            | 0.03235937 | 2.34E-01 | 22/137 (16%) | 0/137 (0%) | 10/137 (7%) | HSPA1L,ITPR2,LPAR1,AKT3,CHRNA10,PIK3R5,GUCY1A3,PRKACB,HSPA14,AQP3,P IK3CA,STUB1,ITPR1,ESR2,PRKCH,LPAR3,VEGFB,HSP90AA1,PRKAR2A,GUCY1A2, PRKD3,ATM,PIK3C2B,AKT2,NOSIP,PROK1,HSPA4,GNAS,ITPR3,DNM2,PLCG1,HSP9 0AB1                                                                                                                                                   |
| G Protein Signaling Mediated by Tubby                                     | 0.03311311 | 3.44E-01 | 6/32 (19%)   | 0/32 (0%)  | 5/32 (16%)  | PLCB1,GNB1L,GNAS,GNB2L1,GNB5,GNG4,PLCB4,LCK,INSR,PLCG1,GNG2                                                                                                                                                                                                                                                                                                       |
| IL-17A Signaling in Airway Cells                                          | 0.03388442 | 2.83E-01 | 14/60 (23%)  | 0/60 (0%)  | 3/60 (5%)   | MAPK14,AKT3,MAPK12,ATM,JAK3,PIK3R5,CCL20,PIK3C2B,JAK1,NFKBIA,AKT2,IL17 RA,PIK3CA,CXCL3,MAPK9,IKBKE,TRAF6                                                                                                                                                                                                                                                          |



|                                                                       |            |          |              |            |             |                                                                                                                                                                                                                                          |
|-----------------------------------------------------------------------|------------|----------|--------------|------------|-------------|------------------------------------------------------------------------------------------------------------------------------------------------------------------------------------------------------------------------------------------|
| Hypoxia Signaling in the Cardiovascular System                        | 0.03388442 | 2.77E-01 | 14/65 (22%)  | 0/65 (0%)  | 4/65 (6%)   | JUN,UBE2F,UBE2G2,ATM,UBE2E3,UBE2N,NFKBIA,UBE2D3,UBE2G1,UBE2D4,UBE2B,UBE2D2,CREBBP,ARNT,UBE2Q1,MDM2,HSP90AB1,HSP90AA1                                                                                                                     |
| Regulation of eIF4 and p70S6K Signaling                               | 0.03388442 | 2.32E-01 | 27/138 (20%) | 0/138 (0%) | 5/138 (4%)  | RPS27L,MAPK14,AKT3,RPS10,PIK3R5,EIF3B,RPS5,RPS20,PIK3CA,ITGB1,RPS11,GRB2,AGO2,RPS25,EIF1AX,RRAS2,RPS18,ATM,MAPK12,PIK3C2B,RPS2,FAU,PPP2R2A,AKT2,RPS19,AGO4,RPS16,EIF2S3,RPS17,EIF2A,PAIP1,RPS15                                          |
| Amyotrophic Lateral Sclerosis Signaling                               | 0.03630781 | 2.5E-01  | 13/96 (14%)  | 0/96 (0%)  | 11/96 (11%) | SOD1,GRIK5,CACNA1E,AKT3,APAF1,GRIK2,ATM,RAB5A,PIK3R5,PIK3C2B,SSR4,CYCS,CACNA1A,GRIN2C,BIRC3,NAIP,GRIN3B,PROK1,PIK3CA,GRIA2,BCL2,CACNA1C,VEGFB,CAPN7                                                                                      |
| IL-22 Signaling                                                       | 0.03630781 | 3.75E-01 | 6/24 (25%)   | 0/24 (0%)  | 3/24 (13%)  | MAPK14,AKT3,SOCS3,STAT1,MAPK12,JAK1,STAT5B,AKT2,MAPK9                                                                                                                                                                                    |
| EGF Signaling                                                         | 0.03715352 | 2.86E-01 | 12/56 (21%)  | 0/56 (0%)  | 4/56 (7%)   | JUN,ITPR2,MAPK14,AKT3,MAPK12,ATM,PIK3R5,PIK3C2B,JAK1,AKT2,PIK3CA,ITPR3,STAT1,GRB2,PLCG1,ITPR1                                                                                                                                            |
| Role of Tissue Factor in Cancer                                       | 0.03715352 | 2.43E-01 | 16/107 (15%) | 0/107 (0%) | 10/107 (9%) | FGF5,MAPK14,GNA11,AKT3,PIK3R5,RPS6KA5,FYN,PIK3CA,PTPN11,LCK,ITGB1,F2,PLCB1,HBEGF,RRAS2,IL1B,F7,ATM,MAPK12,ITGA6,PLAUR,PIK3C2B,AKT2,CFL2,FGB,STAT5B                                                                                       |
| Small Cell Lung Cancer Signaling                                      | 0.03715352 | 2.68E-01 | 17/71 (24%)  | 0/71 (0%)  | 2/71 (3%)   | AKT3,APAF1,ATM,CDK2,PIK3R5,PIK3C2B,CYCS,PTK2,NFKBIA,MAX,AKT2,TRAF5,PIK3CA,BCL2,CDKN2B,CDK6,TRAF4,IKBKE,TRAF6                                                                                                                             |
| Nucleotide Excision Repair                                            | 0.03801894 | 3.33E-01 | 10/33 (30%)  | 0/33 (0%)  | 1/33 (3%)   | ERCC1,GTF2H3,CDK7,POLR2D,MNAT1,RPA1,POLR2C,POLR2I,POLR2K,ERCC3,GTF2H1                                                                                                                                                                    |
| RAR Activation                                                        | 0.03801894 | 2.2E-01  | 28/173 (16%) | 0/173 (0%) | 10/173 (6%) | KAT2B,JUN,MAPK14,PML,AKT3,GTF2H3,DHRS9,RARA,SMARCA2,NSD1,SMARCA4,RDH13,PRKACB,SCAND1,ALDH1A2,RDH14,PIK3CA,RELB,SMAD3,CREBBP,NCOR1,PRKCH,MAPK9,PRKAR2A,ERCC3,CDK7,NCOA1,PRKD3,SMAD2,MED1,MAPK12,MNAT1,AKT2,GNAS,PRMT2,TNIP1,STAT5B,GTF2H1 |
| April Mediated Signaling                                              | 0.04168694 | 3.16E-01 | 9/38 (24%)   | 0/38 (0%)  | 3/38 (8%)   | JUN,NFATC3,NFATC4,MAPK14,NFATC2,MAPK12,MAP3K14,NFKBIA,MAPK9,TRAF5,TRAF6,IKBKE                                                                                                                                                            |
| Netrin Signaling                                                      | 0.04168694 | 3.16E-01 | 7/38 (18%)   | 0/38 (0%)  | 5/38 (13%)  | NFATC3,NFATC4,PPP3R1,NFATC2,DCC,UNC5B,ABLIM1,PRKACB,NCK1,PPP3CC,ENAH,PRKAR2A                                                                                                                                                             |
| Production of Nitric Oxide and Reactive Oxygen Species in Macrophages | 0.04265795 | 2.19E-01 | 26/169 (15%) | 0/169 (0%) | 11/169 (7%) | JUN,RHOH,PPP1R14A,MAPK14,AKT3,JAK3,PIK3R5,NFKBIA,MAP3K13,PPP1R3D,PIK3CA,STAT1,TNF,CREBBP,PRKCH,SIRPA,TLR2,MAP3K3,MAPK9,ALB,FNBP1,PRKD3,ATM,MAPK12,MAP3K14,JAK1,PIK3C2B,PPP2R2A,AKT2,MAP3K9,MAP3K2,CLU,RAP1B,PLCG1,CYBB,RHOF,IKBKE        |
| Natural Killer Cell Signaling                                         | 0.04265795 | 2.47E-01 | 19/93 (20%)  | 0/93 (0%)  | 4/93 (4%)   | AKT3,RRAS2,PRKD3,KLRB1,ATM,PIK3R5,PIK3C2B,AKT2,PAK7,FYN,INPP5B,PIK3CA,PTPN11,LCK,INPP5K,GRB2,PLCG1,SYNJ2,LAT,PRKCH,CD247,NCK1,ZAP70                                                                                                      |
| Role of JAK family kinases in IL-6-type Cytokine Signaling            | 0.04265795 | 3.6E-01  | 5/25 (20%)   | 0/25 (0%)  | 4/25 (16%)  | MAPK14,SOCS3,PTPN11,STAT1,MAPK12,JAK1,STAT5B,IL6ST,MAPK9                                                                                                                                                                                 |
| Systemic Lupus Erythematosus Signaling                                | 0.04265795 | 2.17E-01 | 33/175 (19%) | 0/175 (0%) | 5/175 (3%)  | JUN,SNRPB2,AKT3,NFATC2,PIK3R5,SNRPD1,HNRNPC,RNPC3,LSM5,PIK3CA,PRPF18,TNF,PRPF8,LCK,SNRPA1,IGHM,GRB2,CD80,LAT,NFATC4,TNFSF13B,RRAS2,IL1B,ATM,LSM8,PIM2,PIK3C2B,PRPF3,AKT2,SART1,NFATC3,SNRPD2,SNRPN,IL1A,PRPF40A,PLCG1,CD247,PRPF31       |
| Assembly of RNA Polymerase II Complex                                 | 0.04466836 | 2.92E-01 | 13/48 (27%)  | 0/48 (0%)  | 1/48 (2%)   | GTF2H3,CDK7,MNAT1,TAF4B,TAF3,TAF9B,POLR2C,TAF7,POLR2K,POLR2D,TAF10,POLR2I,ERCC3,GTF2H1                                                                                                                                                   |

|                                                                                |            |          |              |            |              |                                                                                                                                                                                                                                                                                                                                                     |
|--------------------------------------------------------------------------------|------------|----------|--------------|------------|--------------|-----------------------------------------------------------------------------------------------------------------------------------------------------------------------------------------------------------------------------------------------------------------------------------------------------------------------------------------------------|
| Role of CHK Proteins in Cell Cycle Checkpoint Control                          | 0.04466836 | 2.83E-01 | 13/53 (25%)  | 0/53 (0%)  | 2/53 (4%)    | RFC3,TLK2,ATM,CDK2,TLK1,E2F3,PPP2R2A,RFC1,RFC5,ATR,RPA1,RAD17,MRE11A,ATMIN,CHEK1                                                                                                                                                                                                                                                                    |
| IL-2 Signaling                                                                 | 0.04466836 | 2.83E-01 | 13/53 (25%)  | 0/53 (0%)  | 2/53 (4%)    | JUN,AKT3,RRAS2,ATM,JAK3,PIK3R5,IL2RB,PIK3C2B,JAK1,AKT2,PIK3CA,PTPN11,LCK,GRB2,STAT5B                                                                                                                                                                                                                                                                |
| CCR3 Signaling in Eosinophils                                                  | 0.04570882 | 2.36E-01 | 17/110 (15%) | 0/110 (0%) | 9/110 (8%)   | PLA2G2D,ITPR2,MAPK14,PIK3R5,PAK7,MPRIIP,PIK3CA,GNG4,ITPR1,PRKCH,PLA2G4A,PLCB1,RRAS2,GNB2L1,PRKD3,ATM,MAPK12,PLCB4,PIK3C2B,CFL2,GNB1L,GNAS,ITPR3,GNB5,PLA2G12A,GNG2                                                                                                                                                                                  |
| VEGF Signaling                                                                 | 0.04677351 | 2.47E-01 | 16/89 (18%)  | 0/89 (0%)  | 6/89 (7%)    | EIF1AX,AKT3,RRAS2,ATM,PIK3R5,PIK3C2B,PTK2,AKT2,BAD,PROK1,EIF2S3,PIK3CA,ACTG1,ACTB,PTPN11,BCL2,GRB2,PLCG1,ARNT,ELAVL1,VEGFB,FOXO1                                                                                                                                                                                                                    |
| IL-8 Signaling                                                                 | 0.04786301 | 2.15E-01 | 26/177 (15%) | 0/177 (0%) | 12/177 (7%)  | JUN,RHOH,AKT3,MMP2,PIK3R5,ITGB2,PLD1,VCAM1,PIK3CA,GNG4,PRKCH,VEGFB,MAPK9,TRAF6,FNBP1,HBEGF,RRAS2,CCND2,GNB2L1,PRKD3,VASP,ATM,MAPK12,RAB11FIP2,PIK3C2B,PTK2,AKT2,GNB1L,PROK1,GNAS,GNB5,CXCR1,BCL2,GNG2,ICAM1,CYBB,RHOF,IKBKE                                                                                                                         |
| CXCR4 Signaling                                                                | 0.04786301 | 2.21E-01 | 24/149 (16%) | 0/149 (0%) | 9/149 (6%)   | JUN,RHOH,ARHGEF11,ITPR2,GNA11,AKT3,PIK3R5,PAK7,CXCR4,PIK3CA,GNG4,ITPR1,PRKCH,MAPK9,FNBP1,PLCB1,RRAS2,GNB2L1,PRKD3,ATM,MAPK12,PLCB4,MYL12A,PIK3C2B,PTK2,AKT2,GNB1L,GNAS,ITPR3,GNB5,MYL3,GNG2,RHOF                                                                                                                                                    |
| HER-2 Signaling in Breast Cancer                                               | 0.04897788 | 2.57E-01 | 15/74 (20%)  | 0/74 (0%)  | 4/74 (5%)    | AKT3,MMP2,RRAS2,PRKD3,ATM,PIK3R5,PIK3C2B,ITGB2,AKT2,BAD,AREG,PIK3CA,ITGB1,GRB2,PLCG1,MDM2,PRKCH,CDK6,FOXO1                                                                                                                                                                                                                                          |
| Cellular Effects of Sildenafil (Viagra)                                        | 0.04897788 | 2.3E-01  | 12/122 (10%) | 0/122 (0%) | 16/122 (13%) | SLC4A11,ITPR2,PDE3B,GUCY1A3,PRKACB,MPRIIP,MYH14,ACTG1,ACTB,MYH11,ITPR1,PRKAR2A,NPPA,PLCB1,CACNA1E,GUCY1A2,PLCB4,MYL12A,PDE1B,CACNG1,CACNA1A,GNAS,ITPR3,MYL3,CACNA1C,PDIA3,PLCG1,PLCL2                                                                                                                                                               |
| Adipogenesis pathway                                                           | 0.04897788 | 2.3E-01  | 21/122 (17%) | 0/122 (0%) | 7/122 (6%)   | GTF2H3,ATG5,FZD2,RBP7,DGKD,LPIN1,FBXW7,TNF,SMAD3,FOXO1,BMP7,ERCC3,CTBP1,NFATC4,HDAC5,FABP4,CDK7,SREBF1,MNAT1,SAP18,ATG7,HDAC3,KLF3,EBF1,NR1D2,XBP1,STAT5B,GTF2H1                                                                                                                                                                                    |
| Role of Macrophages, Fibroblasts and Endothelial Cells in Rheumatoid Arthritis | 0.04897788 | 1.98E-01 | 36/288 (13%) | 0/288 (0%) | 21/288 (7%)  | CAMK2B,NFATC2,PIK3R5,NFKBIA,IL1RAPL2,PRKCH,TLR2,MAPK9,TRAF6,TNFSF13B,CCL5,IL1B,PRKD3,LEF1,PLCB4,LTBR,PIK3C2B,TRAF5,PROK1,IL17RA,PPP3R1,IL1A,PDIA3,IKBKE,JUN,IL15,MAPK14,AKT3,SOCS3,FZD2,PPP3CC,APC,VCAM1,WNT8B,FN1,PIK3CA,TNF,CREBBP,CEBPE,TRAF4,VEGFB,PLCB1,NFATC4,TCF3,RRAS2,WNT7B,ATM,MAP3K14,AKT2,DVL1,IL6ST,NFATC3,PLCG1,PLCL2,FRZB,ICAM1,APC2 |
| SAPK/JNK Signaling                                                             | 0.04897788 | 2.44E-01 | 15/90 (17%)  | 0/90 (0%)  | 7/90 (8%)    | JUN,MAP4K2,RRAS2,ZAK,CRKL,MAP4K5,MAPK12,ATM,MAP4K1,PIK3R5,PIK3C2B,GAB1,MAP3K13,MAP3K9,NFATC3,PIK3CA,MAP3K2,LCK,GRB2,GNG2,MAP3K3,MAPK9                                                                                                                                                                                                               |
| Death Receptor Signaling                                                       | 0.04897788 | 2.44E-01 | 15/90 (17%)  | 0/90 (0%)  | 7/90 (8%)    | TANK,CASP10,APAF1,HTRA2,MAP3K14,PARP8,CYCS,NFKBIA,TNFRSF25,ACIN1,PARP6,BIRC3,PARP10,TIPARP,NAIP,ACTG1,ACTB,TNF,BCL2,TNKS2,FAS,IKBKE                                                                                                                                                                                                                 |

**Supplementary Table S8: Immune/inflammatory molecules among the 357 gene signature of Tolerance.**

| Categories                                                                                                                                                                 | Diseases or Functions Annotation                  | p-value  | Molecules                                    | # Molecules |
|----------------------------------------------------------------------------------------------------------------------------------------------------------------------------|---------------------------------------------------|----------|----------------------------------------------|-------------|
| Cell-To-Cell Signaling and Interaction, Cellular Function and Maintenance, Hematological System Development and Function, Inflammatory Response                            | phagocytosis of leukocyte cell lines              | 5.18E-04 | FGR,MRC1,TLR4                                | 3           |
| Cell-To-Cell Signaling and Interaction, Hematological System Development and Function, Immune Cell Trafficking, Inflammatory Response, Tissue Development                  | binding of neutrophils                            | 1.19E-03 | FGR,LSP1,TLR4                                | 3           |
| Antimicrobial Response, Inflammatory Response                                                                                                                              | antibacterial response                            | 1.68E-03 | CARD9,FGR,LYST,NLRC4,TLR4                    | 5           |
| Cell-To-Cell Signaling and Interaction, Hematological System Development and Function, Inflammatory Response                                                               | binding of professional phagocytic cells          | 2.08E-03 | FGR,LSP1,NOTCH2,TLR4                         | 4           |
| Inflammatory Response                                                                                                                                                      | immune response of cells                          | 5.95E-03 | CARD9,CLEC7A,ETS2,FGR,MRC1,MYO7A,SCARF1,TLR4 | 8           |
| Antimicrobial Response, Inflammatory Response                                                                                                                              | antimicrobial response                            | 6.20E-03 | CARD9,CLEC7A,FGR,LYST,NLRC4,TLR4             | 6           |
| Inflammatory Response                                                                                                                                                      | innate immune response                            | 6.56E-03 | CARD9,CLEC7A,TLR4,TRIM59                     | 4           |
| Cellular Function and Maintenance, Inflammatory Response                                                                                                                   | phagocytosis                                      | 6.92E-03 | CLEC7A,ETS2,FGR,MRC1,MYO7A,TLR4,TPCN2        | 7           |
| Cell-To-Cell Signaling and Interaction, Inflammatory Response                                                                                                              | immune response of renal tubular epithelial cells | 1.26E-02 | TLR4                                         | 1           |
| Hematological System Development and Function, Inflammatory Response, Tissue Morphology                                                                                    | number of non-plasmacytoid dendritic cells        | 1.26E-02 | NOTCH2                                       | 1           |
| Hematological System Development and Function, Inflammatory Response, Tissue Morphology                                                                                    | quantity of spleen-derived dendritic cells        | 1.26E-02 | RPTOR                                        | 1           |
| Cell Morphology, Inflammatory Response                                                                                                                                     | size of Langerhans cells                          | 1.26E-02 | RPTOR                                        | 1           |
| Cell-To-Cell Signaling and Interaction, Cellular Growth and Proliferation, Hematological System Development and Function, Hypersensitivity Response, Inflammatory Response | stimulation of BMDC cells                         | 1.26E-02 | TLR4                                         | 1           |
| Cellular Function and Maintenance, Inflammatory Response                                                                                                                   | turnover of Langerhans cells                      | 1.26E-02 | RPTOR                                        | 1           |
| Cell-To-Cell Signaling and Interaction, Cellular Growth and Proliferation, Hematological System Development and Function, Inflammatory Response                            | stimulation of phagocytes                         | 1.31E-02 | IL4R,TLR4                                    | 2           |
| Antimicrobial Response, Humoral Immune Response, Inflammatory Response                                                                                                     | antifungal response                               | 1.50E-02 | CARD9,CLEC7A                                 | 2           |
| Cell-To-Cell Signaling and Interaction, Cellular Function and Maintenance, Inflammatory Response                                                                           | phagocytosis of cells                             | 1.66E-02 | CLEC7A,ETS2,FGR,MRC1,MYO7A,TLR4              | 6           |
| Cell Morphology, Cellular Assembly and Organization, Cellular Function and Maintenance, Inflammatory Response                                                              | accumulation of autophagosomes                    | 2.51E-02 | TPCN2                                        | 1           |
| Antimicrobial Response, Humoral Immune Response, Inflammatory Response                                                                                                     | detection of yeast                                | 2.51E-02 | CLEC7A                                       | 1           |
| Cell Morphology, Cellular Assembly and Organization, Cellular Function and Maintenance, Inflammatory Response                                                              | fusion of autophagosomes                          | 2.51E-02 | TPCN2                                        | 1           |
| Cell Morphology, Hematological System Development and Function, Inflammatory Response                                                                                      | polarization of neutrophils                       | 2.51E-02 | LSP1                                         | 1           |
| Immunological Disease, Inflammatory Disease, Inflammatory Response, Respiratory Disease                                                                                    | allergic inflammation of airway                   | 3.74E-02 | TLR4                                         | 1           |

|                                                                                                                                                          |                                                    |          |        |   |
|----------------------------------------------------------------------------------------------------------------------------------------------------------|----------------------------------------------------|----------|--------|---|
| Immunological Disease, Inflammatory Disease, Inflammatory Response, Organismal Injury and Abnormalities, Renal and Urological Disease                    | lupus-like autoimmune nephritis                    | 3.74E-02 | IL21R  | 1 |
| Cellular Development, Cellular Growth and Proliferation, Hematological System Development and Function, Inflammatory Response                            | proliferation of mononuclear phagocyte progenitors | 3.74E-02 | CSF1R  | 1 |
| Cell-To-Cell Signaling and Interaction, Cellular Movement, Hematological System Development and Function, Immune Cell Trafficking, Inflammatory Response | recruitment of tumor-associated macrophages        | 3.74E-02 | CSF1R  | 1 |
| Cell-To-Cell Signaling and Interaction, Cellular Growth and Proliferation, Hematological System Development and Function, Inflammatory Response          | stimulation of bone marrow-derived dendritic cells | 3.74E-02 | TLR4   | 1 |
| Inflammatory Response                                                                                                                                    | acute inflammatory response of lung                | 4.96E-02 | TLR4   | 1 |
| Auditory Disease, Dermatological Diseases and Conditions, Immunological Disease, Inflammatory Disease, Inflammatory Response                             | allergic contact dermatitis of ear                 | 4.96E-02 | TLR4   | 1 |
| Cell-To-Cell Signaling and Interaction, Hematological System Development and Function, Hypersensitivity Response, Inflammatory Response                  | binding of mast cells                              | 4.96E-02 | NOTCH2 | 1 |
| Infectious Disease, Inflammatory Disease, Inflammatory Response                                                                                          | experimentally induced bacterial peritonitis       | 4.96E-02 | CMKLR1 | 1 |
| Cell-To-Cell Signaling and Interaction, Cellular Growth and Proliferation, Hematological System Development and Function, Inflammatory Response          | induction of alternatively activated macrophages   | 4.96E-02 | IL4R   | 1 |
| Cell Morphology, Hematological System Development and Function, Inflammatory Response, Organismal Development                                            | morphology of peritoneal macrophages               | 4.96E-02 | ETS2   | 1 |
| Cell-To-Cell Signaling and Interaction, Cellular Function and Maintenance, Inflammatory Response                                                         | phagocytosis of leukemia cell lines                | 4.96E-02 | ETS2   | 1 |
| Cell-To-Cell Signaling and Interaction, Cellular Function and Maintenance, Inflammatory Response                                                         | phagocytosis of osteoclast precursor cells         | 4.96E-02 | TLR4   | 1 |
| Cell-To-Cell Signaling and Interaction, Cellular Function and Maintenance, Inflammatory Response                                                         | phagocytosis of photoreceptors                     | 4.96E-02 | MYO7A  | 1 |
| Cell Morphology, Hematological System Development and Function, Inflammatory Response                                                                    | size of blood platelets                            | 4.96E-02 | IL4R   | 1 |

Supplementary Table S9

| <b>Supplementary Table S9: Gene signatures of Tolerance in Renal Biopsies.</b> |                                      |                                                                                            |                                                                         |                                                                     |
|--------------------------------------------------------------------------------|--------------------------------------|--------------------------------------------------------------------------------------------|-------------------------------------------------------------------------|---------------------------------------------------------------------|
| <b>Probeset ID</b>                                                             | <b>Gene Symbol</b>                   | <b>Gene Title</b>                                                                          | <b>p-value<br/>(Year 1 &amp; 2<br/>TOL vs. Year<br/>1 &amp; 2 nTOL)</b> | <b>Fold-Change (Year 1 &amp; 2 TOL vs. Year 1<br/>&amp; 2 nTOL)</b> |
| 1561477_PM_at                                                                  | CCDC144A                             | coiled-coil domain containing 144A                                                         | 1.64E-05                                                                | Year 1 & 2 TOL up vs Year 1 & 2 nTOL                                |
| 207751_PM_at                                                                   | EST1                                 | EST1                                                                                       | 1.69E-05                                                                | Year 1 & 2 TOL up vs Year 1 & 2 nTOL                                |
| 1560119_PM_at                                                                  | LOC389634                            | hypothetical LOC389634                                                                     | 2.03E-05                                                                | Year 1 & 2 TOL up vs Year 1 & 2 nTOL                                |
| 1558523_PM_at                                                                  | FAM184A                              | family with sequence similarity 184, member A                                              | 2.77E-05                                                                | Year 1 & 2 TOL down vs Year 1 & 2 nTOL                              |
| 233253_PM_at                                                                   | EST2                                 | EST2                                                                                       | 2.96E-05                                                                | Year 1 & 2 TOL up vs Year 1 & 2 nTOL                                |
| 208176_PM_at                                                                   | DUX1                                 | double homeobox 1                                                                          | 3.58E-05                                                                | Year 1 & 2 TOL up vs Year 1 & 2 nTOL                                |
| 65585_PM_at                                                                    | FAM86B1 ///<br>FAM86C ///<br>FAM86DP | family with sequence similarity 86, member B1 /// family<br>with sequence similarity 86, m | 4.31E-05                                                                | Year 1 & 2 TOL up vs Year 1 & 2 nTOL                                |
| 219997_PM_s_at                                                                 | COPS7B                               | COP9 constitutive photomorphogenic homolog subunit 7B<br>(Arabidopsis)                     | 4.41E-05                                                                | Year 1 & 2 TOL up vs Year 1 & 2 nTOL                                |
| 229257_PM_at                                                                   | TNRC18                               | trinucleotide repeat containing 18                                                         | 4.86E-05                                                                | Year 1 & 2 TOL up vs Year 1 & 2 nTOL                                |
| 237284_PM_at                                                                   | DNAJB8                               | DnaJ (Hsp40) homolog, subfamily B, member 8                                                | 5.63E-05                                                                | Year 1 & 2 TOL up vs Year 1 & 2 nTOL                                |
| 237325_PM_at                                                                   | C22orf43                             | chromosome 22 open reading frame 43                                                        | 6.04E-05                                                                | Year 1 & 2 TOL up vs Year 1 & 2 nTOL                                |
| 229312_PM_s_at                                                                 | GKAP1                                | G kinase anchoring protein 1                                                               | 6.46E-05                                                                | Year 1 & 2 TOL up vs Year 1 & 2 nTOL                                |
| 1553027_PM_a_at                                                                | KLHL4                                | kelch-like 4 (Drosophila)                                                                  | 8.40E-05                                                                | Year 1 & 2 TOL down vs Year 1 & 2 nTOL                              |
| 33132_PM_at                                                                    | CPSF1                                | cleavage and polyadenylation specific factor 1, 160kDa                                     | 9.07E-05                                                                | Year 1 & 2 TOL up vs Year 1 & 2 nTOL                                |
| 1563792_PM_at                                                                  | EST3                                 | EST3                                                                                       | 0.00012673                                                              | Year 1 & 2 TOL up vs Year 1 & 2 nTOL                                |
| 211377_PM_x_at                                                                 | MYCN                                 | v-myc myelocytomatosis viral related oncogene,<br>neuroblastoma derived (avian)            | 0.00014296                                                              | Year 1 & 2 TOL up vs Year 1 & 2 nTOL                                |
| 203028_PM_s_at                                                                 | CYBA                                 | cytochrome b-245, alpha polypeptide                                                        | 0.0001478                                                               | Year 1 & 2 TOL up vs Year 1 & 2 nTOL                                |
| 211702_PM_s_at                                                                 | USP32                                | ubiquitin specific peptidase 32                                                            | 0.00015166                                                              | Year 1 & 2 TOL up vs Year 1 & 2 nTOL                                |
| 238324_PM_at                                                                   | GATAD2A                              | GATA zinc finger domain containing 2A                                                      | 0.0001593                                                               | Year 1 & 2 TOL up vs Year 1 & 2 nTOL                                |
| 1558373_PM_s_at                                                                | EST39                                | EST39                                                                                      | 0.00016859                                                              | Year 1 & 2 TOL down vs Year 1 & 2 nTOL                              |
| 203335_PM_at                                                                   | PHYH                                 | phytanoyl-CoA 2-hydroxylase                                                                | 0.00017244                                                              | Year 1 & 2 TOL up vs Year 1 & 2 nTOL                                |
| 1561329_PM_s_at                                                                | RPUSD3                               | RNA pseudouridylate synthase domain containing 3                                           | 0.00018118                                                              | Year 1 & 2 TOL up vs Year 1 & 2 nTOL                                |
| 229227_PM_at                                                                   | FLJ45244                             | hypothetical locus FLJ45244                                                                | 0.00018264                                                              | Year 1 & 2 TOL up vs Year 1 & 2 nTOL                                |
| 228367_PM_at                                                                   | ALPK2                                | alpha-kinase 2                                                                             | 0.00018702                                                              | Year 1 & 2 TOL up vs Year 1 & 2 nTOL                                |
| 244179_PM_x_at                                                                 | GGT2                                 | gamma-glutamyltransferase 2                                                                | 0.00018795                                                              | Year 1 & 2 TOL up vs Year 1 & 2 nTOL                                |

Supplementary Table 9S

|                 |                     |                                                                      |            |                                        |
|-----------------|---------------------|----------------------------------------------------------------------|------------|----------------------------------------|
| 1561293_PM_at   | LOC100287584        | Hypothetical protein LOC100287584                                    | 0.00019298 | Year 1 & 2 TOL up vs Year 1 & 2 nTOL   |
| 208751_PM_at    | NAPA                | N-ethylmaleimide-sensitive factor attachment protein, alpha          | 0.00020732 | Year 1 & 2 TOL up vs Year 1 & 2 nTOL   |
| 221784_PM_at    | WIZ                 | widely interspaced zinc finger motifs                                | 0.00021016 | Year 1 & 2 TOL up vs Year 1 & 2 nTOL   |
| 202407_PM_s_at  | PRPF31              | PRP31 pre-mRNA processing factor 31 homolog ( <i>S. cerevisiae</i> ) | 0.00021437 | Year 1 & 2 TOL up vs Year 1 & 2 nTOL   |
| 238386_PM_x_at  | EST40               | EST40                                                                | 0.00021511 | Year 1 & 2 TOL down vs Year 1 & 2 nTOL |
| 201638_PM_s_at  | CPSF1               | cleavage and polyadenylation specific factor 1, 160kDa               | 0.00021774 | Year 1 & 2 TOL up vs Year 1 & 2 nTOL   |
| 1562923_PM_at   | EST4                | EST4                                                                 | 0.00023199 | Year 1 & 2 TOL up vs Year 1 & 2 nTOL   |
| 237672_PM_at    | EST41               | EST41                                                                | 0.00025509 | Year 1 & 2 TOL down vs Year 1 & 2 nTOL |
| 243074_PM_at    | EST5                | EST5                                                                 | 0.00026492 | Year 1 & 2 TOL up vs Year 1 & 2 nTOL   |
| 207163_PM_s_at  | AKT1                | v-akt murine thymoma viral oncogene homolog 1                        | 0.00028043 | Year 1 & 2 TOL down vs Year 1 & 2 nTOL |
| 216641_PM_s_at  | LAD1                | ladinin 1                                                            | 0.00028049 | Year 1 & 2 TOL up vs Year 1 & 2 nTOL   |
| 235191_PM_at    | LOC148189           | Hypothetical LOC148189                                               | 0.00028099 | Year 1 & 2 TOL down vs Year 1 & 2 nTOL |
| 206848_PM_at    | FAM36A ///<br>HOXA7 | family with sequence similarity 36, member A /// homeobox A7         | 0.00029678 | Year 1 & 2 TOL up vs Year 1 & 2 nTOL   |
| 214904_PM_at    | ZNF41               | zinc finger protein 41                                               | 0.00030231 | Year 1 & 2 TOL down vs Year 1 & 2 nTOL |
| 205378_PM_s_at  | ACHE                | acetylcholinesterase                                                 | 0.00030239 | Year 1 & 2 TOL down vs Year 1 & 2 nTOL |
| 207548_PM_at    | GRM7                | glutamate receptor, metabotropic 7                                   | 0.00031552 | Year 1 & 2 TOL down vs Year 1 & 2 nTOL |
| 240465_PM_at    | C4orf32             | chromosome 4 open reading frame 32                                   | 0.00031931 | Year 1 & 2 TOL up vs Year 1 & 2 nTOL   |
| 1559048_PM_at   | BAHCC1              | BAH domain and coiled-coil containing 1                              | 0.00032416 | Year 1 & 2 TOL up vs Year 1 & 2 nTOL   |
| 201391_PM_at    | TRAP1               | TNF receptor-associated protein 1                                    | 0.0003243  | Year 1 & 2 TOL up vs Year 1 & 2 nTOL   |
| 233141_PM_s_at  | ST7L                | suppression of tumorigenicity 7 like                                 | 0.00032524 | Year 1 & 2 TOL down vs Year 1 & 2 nTOL |
| 226186_PM_at    | TMOD2               | tropomodulin 2 (neuronal)                                            | 0.00033536 | Year 1 & 2 TOL up vs Year 1 & 2 nTOL   |
| 227063_PM_at    | C17orf61            | chromosome 17 open reading frame 61                                  | 0.00033678 | Year 1 & 2 TOL up vs Year 1 & 2 nTOL   |
| 51200_PM_at     | C19orf60            | chromosome 19 open reading frame 60                                  | 0.00043507 | Year 1 & 2 TOL up vs Year 1 & 2 nTOL   |
| 205690_PM_s_at  | BUD31               | BUD31 homolog ( <i>S. cerevisiae</i> )                               | 0.00044293 | Year 1 & 2 TOL up vs Year 1 & 2 nTOL   |
| 243626_PM_at    | EST6                | EST6                                                                 | 0.00044546 | Year 1 & 2 TOL up vs Year 1 & 2 nTOL   |
| 239490_PM_at    | C7orf44             | chromosome 7 open reading frame 44                                   | 0.00046489 | Year 1 & 2 TOL down vs Year 1 & 2 nTOL |
| 220951_PM_s_at  | A1CF                | APOBEC1 complementation factor                                       | 0.00047387 | Year 1 & 2 TOL up vs Year 1 & 2 nTOL   |
| 1558001_PM_s_at | ARID5B              | AT rich interactive domain 5B (MRF1-like)                            | 0.00047627 | Year 1 & 2 TOL up vs Year 1 & 2 nTOL   |
| 224574_PM_at    | C17orf49            | chromosome 17 open reading frame 49                                  | 0.00048859 | Year 1 & 2 TOL up vs Year 1 & 2 nTOL   |
| 215707_PM_s_at  | PRNP                | prion protein                                                        | 0.00050515 | Year 1 & 2 TOL up vs Year 1 & 2 nTOL   |
| 1560841_PM_at   | LOC389247           | hypothetical LOC389247                                               | 0.00051116 | Year 1 & 2 TOL up vs Year 1 & 2 nTOL   |

Supplementary Table 9S

|                 |                            |                                                                                         |            |                                        |
|-----------------|----------------------------|-----------------------------------------------------------------------------------------|------------|----------------------------------------|
| 1562793_PM_at   | EST42                      | EST42                                                                                   | 0.00052125 | Year 1 & 2 TOL down vs Year 1 & 2 nTOL |
| 224810_PM_s_at  | ANKRD13A                   | ankyrin repeat domain 13A                                                               | 0.00052295 | Year 1 & 2 TOL down vs Year 1 & 2 nTOL |
| 205760_PM_s_at  | OGG1                       | 8-oxoguanine DNA glycosylase                                                            | 0.00053678 | Year 1 & 2 TOL up vs Year 1 & 2 nTOL   |
| 232333_PM_at    | EST7                       | EST7                                                                                    | 0.00053763 | Year 1 & 2 TOL up vs Year 1 & 2 nTOL   |
| 228035_PM_at    | STK33                      | serine/threonine kinase 33                                                              | 0.00054817 | Year 1 & 2 TOL up vs Year 1 & 2 nTOL   |
| 224082_PM_at    | EST8                       | EST8                                                                                    | 0.00054907 | Year 1 & 2 TOL up vs Year 1 & 2 nTOL   |
| 228552_PM_s_at  | ISYNA1                     | inositol-3-phosphate synthase 1                                                         | 0.00054955 | Year 1 & 2 TOL up vs Year 1 & 2 nTOL   |
| 212289_PM_at    | ANKRD12                    | ankyrin repeat domain 12                                                                | 0.00056509 | Year 1 & 2 TOL up vs Year 1 & 2 nTOL   |
| 212117_PM_at    | RHOQ                       | ras homolog gene family, member Q                                                       | 0.0005666  | Year 1 & 2 TOL up vs Year 1 & 2 nTOL   |
| 220233_PM_at    | FBXO17 ///<br>SARS2        | F-box protein 17 /// seryl-tRNA synthetase 2, mitochondrial                             | 0.00058109 | Year 1 & 2 TOL up vs Year 1 & 2 nTOL   |
| 218922_PM_s_at  | LASS4                      | LAG1 homolog, ceramide synthase 4                                                       | 0.00059362 | Year 1 & 2 TOL up vs Year 1 & 2 nTOL   |
| 227917_PM_at    | FAM85A ///<br>FAM85B       | family with sequence similarity 85, member A /// family with sequence similarity 85, me | 0.00059516 | Year 1 & 2 TOL up vs Year 1 & 2 nTOL   |
| 208699_PM_x_at  | TKT                        | transketolase                                                                           | 0.00059824 | Year 1 & 2 TOL up vs Year 1 & 2 nTOL   |
| 206787_PM_at    | BRDT                       | bromodomain, testis-specific                                                            | 0.00060127 | Year 1 & 2 TOL down vs Year 1 & 2 nTOL |
| 233915_PM_at    | C5orf36                    | chromosome 5 open reading frame 36                                                      | 0.00060463 | Year 1 & 2 TOL down vs Year 1 & 2 nTOL |
| 236585_PM_at    | EST9                       | EST9                                                                                    | 0.00061396 | Year 1 & 2 TOL up vs Year 1 & 2 nTOL   |
| 236428_PM_at    | EST43                      | EST43                                                                                   | 0.0006141  | Year 1 & 2 TOL down vs Year 1 & 2 nTOL |
| 1565705_PM_x_at | EST10                      | EST10                                                                                   | 0.00062683 | Year 1 & 2 TOL up vs Year 1 & 2 nTOL   |
| 239727_PM_at    | DIO3-OS                    | DIO3 opposite strand (non-protein coding)                                               | 0.0006322  | Year 1 & 2 TOL down vs Year 1 & 2 nTOL |
| 218087_PM_s_at  | SORBS1                     | sorbin and SH3 domain containing 1                                                      | 0.00067516 | Year 1 & 2 TOL up vs Year 1 & 2 nTOL   |
| 222993_PM_at    | MRPL37                     | mitochondrial ribosomal protein L37                                                     | 0.00067751 | Year 1 & 2 TOL up vs Year 1 & 2 nTOL   |
| 207859_PM_s_at  | CHRN3                      | cholinergic receptor, nicotinic, beta 3                                                 | 0.00068301 | Year 1 & 2 TOL down vs Year 1 & 2 nTOL |
| 218921_PM_at    | LOC100294402<br>/// SIGIRR | single Ig IL-1-related receptor-like /// single immunoglobulin and toll-interleukin 1 r | 0.00068385 | Year 1 & 2 TOL up vs Year 1 & 2 nTOL   |
| 214338_PM_at    | DNAJB12                    | DnaJ (Hsp40) homolog, subfamily B, member 12                                            | 0.00069407 | Year 1 & 2 TOL up vs Year 1 & 2 nTOL   |
| 228910_PM_at    | EST44                      | EST44                                                                                   | 0.0007379  | Year 1 & 2 TOL down vs Year 1 & 2 nTOL |
| 219872_PM_at    | FAM198B                    | family with sequence similarity 198, member B                                           | 0.00074365 | Year 1 & 2 TOL up vs Year 1 & 2 nTOL   |
| 211890_PM_x_at  | CAPN3                      | calpain 3, (p94)                                                                        | 0.00079718 | Year 1 & 2 TOL up vs Year 1 & 2 nTOL   |
| 212392_PM_s_at  | PDE4DIP                    | phosphodiesterase 4D interacting protein                                                | 0.00081565 | Year 1 & 2 TOL down vs Year 1 & 2 nTOL |
| 237786_PM_at    | EST45                      | EST45                                                                                   | 0.00083332 | Year 1 & 2 TOL down vs Year 1 & 2 nTOL |
| 219398_PM_at    | CIDEC                      | cell death-inducing DFFA-like effector c                                                | 0.00085919 | Year 1 & 2 TOL down vs Year 1 & 2 nTOL |

Supplementary Table 9S

|                 |         |                                                                           |            |                                        |
|-----------------|---------|---------------------------------------------------------------------------|------------|----------------------------------------|
| 223732_PM_at    | SLC23A1 | solute carrier family 23 (nucleobase transporters), member 1              | 0.00086864 | Year 1 & 2 TOL up vs Year 1 & 2 nTOL   |
| 218059_PM_at    | ZNF706  | zinc finger protein 706                                                   | 0.00087922 | Year 1 & 2 TOL up vs Year 1 & 2 nTOL   |
| 204859_PM_s_at  | APAF1   | apoptotic peptidase activating factor 1                                   | 0.00088358 | Year 1 & 2 TOL down vs Year 1 & 2 nTOL |
| 230790_PM_x_at  | EST46   | EST46                                                                     | 0.00089159 | Year 1 & 2 TOL down vs Year 1 & 2 nTOL |
| 226896_PM_at    | CHCHD1  | coiled-coil-helix-coiled-coil-helix domain containing 1                   | 0.00089218 | Year 1 & 2 TOL up vs Year 1 & 2 nTOL   |
| 205921_PM_s_at  | SLC6A6  | solute carrier family 6 (neurotransmitter transporter, taurine), member 6 | 0.00090881 | Year 1 & 2 TOL up vs Year 1 & 2 nTOL   |
| 1553533_PM_at   | JPH1    | junctionophilin 1                                                         | 0.00092636 | Year 1 & 2 TOL down vs Year 1 & 2 nTOL |
| 229634_PM_at    | TMEM139 | transmembrane protein 139                                                 | 0.00095947 | Year 1 & 2 TOL up vs Year 1 & 2 nTOL   |
| 206488_PM_s_at  | CD36    | CD36 molecule (thrombospondin receptor)                                   | 0.00096421 | Year 1 & 2 TOL down vs Year 1 & 2 nTOL |
| 1570516_PM_s_at | OR51B5  | olfactory receptor, family 51, subfamily B, member 5                      | 0.00096679 | Year 1 & 2 TOL down vs Year 1 & 2 nTOL |
| 215882_PM_at    | CEP152  | centrosomal protein 152kDa                                                | 0.00096951 | Year 1 & 2 TOL down vs Year 1 & 2 nTOL |
| 207221_PM_at    | F2RL3   | coagulation factor II (thrombin) receptor-like 3                          | 0.00097024 | Year 1 & 2 TOL down vs Year 1 & 2 nTOL |
| 233375_PM_at    | EFCAB2  | EF-hand calcium binding domain 2                                          | 0.00097627 | Year 1 & 2 TOL down vs Year 1 & 2 nTOL |
| 212960_PM_at    | TBC1D9  | TBC1 domain family, member 9 (with GRAM domain)                           | 0.00098088 | Year 1 & 2 TOL down vs Year 1 & 2 nTOL |
| 226435_PM_at    | PAPLN   | papilin, proteoglycan-like sulfated glycoprotein                          | 0.001002   | Year 1 & 2 TOL up vs Year 1 & 2 nTOL   |
| 219521_PM_at    | B3GAT1  | beta-1,3-glucuronyltransferase 1 (glucuronosyltransferase P)              | 0.00100917 | Year 1 & 2 TOL up vs Year 1 & 2 nTOL   |
| 210824_PM_at    | EST47   | EST47                                                                     | 0.00102201 | Year 1 & 2 TOL down vs Year 1 & 2 nTOL |
| 228873_PM_at    | COL22A1 | collagen, type XXII, alpha 1                                              | 0.00102618 | Year 1 & 2 TOL down vs Year 1 & 2 nTOL |
| 235807_PM_at    | EST48   | EST48                                                                     | 0.00104541 | Year 1 & 2 TOL down vs Year 1 & 2 nTOL |
| 214196_PM_s_at  | TPP1    | tripeptidyl peptidase I                                                   | 0.00104754 | Year 1 & 2 TOL up vs Year 1 & 2 nTOL   |
| 221430_PM_s_at  | RNF146  | ring finger protein 146                                                   | 0.00110149 | Year 1 & 2 TOL up vs Year 1 & 2 nTOL   |
| 1554853_PM_at   | CYP2U1  | cytochrome P450, family 2, subfamily U, polypeptide 1                     | 0.001103   | Year 1 & 2 TOL down vs Year 1 & 2 nTOL |
| 224991_PM_at    | CMIP    | c-Maf-inducing protein                                                    | 0.0011136  | Year 1 & 2 TOL up vs Year 1 & 2 nTOL   |
| 205074_PM_at    | SLC22A5 | solute carrier family 22 (organic cation/carnitine transporter), member 5 | 0.00111494 | Year 1 & 2 TOL up vs Year 1 & 2 nTOL   |
| 231916_PM_at    | NOS1    | nitric oxide synthase 1 (neuronal)                                        | 0.00114022 | Year 1 & 2 TOL down vs Year 1 & 2 nTOL |
| 205181_PM_at    | ZNF193  | zinc finger protein 193                                                   | 0.00114251 | Year 1 & 2 TOL up vs Year 1 & 2 nTOL   |
| 234924_PM_s_at  | ZNF687  | zinc finger protein 687                                                   | 0.00114889 | Year 1 & 2 TOL up vs Year 1 & 2 nTOL   |
| 208726_PM_s_at  | EIF2S2  | eukaryotic translation initiation factor 2, subunit 2 beta, 38kDa         | 0.0011597  | Year 1 & 2 TOL up vs Year 1 & 2 nTOL   |
| 213613_PM_s_at  | NADK    | NAD kinase                                                                | 0.00117687 | Year 1 & 2 TOL up vs Year 1 & 2 nTOL   |



Supplementary Table 9S

|                 |                       |                                                                                         |            |                                        |
|-----------------|-----------------------|-----------------------------------------------------------------------------------------|------------|----------------------------------------|
| 222625_PM_s_at  | NDE1                  | nudE nuclear distribution gene E homolog 1 (A. nidulans)                                | 0.00118124 | Year 1 & 2 TOL up vs Year 1 & 2 nTOL   |
| 204559_PM_s_at  | LSM7                  | LSM7 homolog, U6 small nuclear RNA associated (S. cerevisiae)                           | 0.00118768 | Year 1 & 2 TOL up vs Year 1 & 2 nTOL   |
| 244661_PM_at    | SOAT1                 | sterol O-acyltransferase 1                                                              | 0.0012324  | Year 1 & 2 TOL up vs Year 1 & 2 nTOL   |
| 241338_PM_at    | EST49                 | EST49                                                                                   | 0.00123628 | Year 1 & 2 TOL down vs Year 1 & 2 nTOL |
| 223157_PM_at    | C4orf14               | chromosome 4 open reading frame 14                                                      | 0.00124137 | Year 1 & 2 TOL up vs Year 1 & 2 nTOL   |
| 203100_PM_s_at  | CDYL                  | chromodomain protein, Y-like                                                            | 0.00126851 | Year 1 & 2 TOL down vs Year 1 & 2 nTOL |
| 205511_PM_at    | FLJ10038              | hypothetical protein FLJ10038                                                           | 0.00128698 | Year 1 & 2 TOL up vs Year 1 & 2 nTOL   |
| 239398_PM_at    | KLHL31                | kelch-like 31 (Drosophila)                                                              | 0.0012887  | Year 1 & 2 TOL down vs Year 1 & 2 nTOL |
| 228766_PM_at    | CD36                  | CD36 molecule (thrombospondin receptor)                                                 | 0.00130961 | Year 1 & 2 TOL down vs Year 1 & 2 nTOL |
| 215764_PM_x_at  | AP2A2                 | adaptor-related protein complex 2, alpha 2 subunit                                      | 0.00131612 | Year 1 & 2 TOL up vs Year 1 & 2 nTOL   |
| 203667_PM_at    | TBCA                  | tubulin folding cofactor A                                                              | 0.00133997 | Year 1 & 2 TOL up vs Year 1 & 2 nTOL   |
| 205572_PM_at    | ANGPT2                | angiopoietin 2                                                                          | 0.00134652 | Year 1 & 2 TOL down vs Year 1 & 2 nTOL |
| 230799_PM_at    | LOC100134259          | similar to hCG1987718                                                                   | 0.0013564  | Year 1 & 2 TOL down vs Year 1 & 2 nTOL |
| 211889_PM_x_at  | CEACAM1               | carcinoembryonic antigen-related cell adhesion molecule 1 (biliary glycoprotein)        | 0.00136732 | Year 1 & 2 TOL up vs Year 1 & 2 nTOL   |
| 224480_PM_s_at  | AGPAT9                | 1-acylglycerol-3-phosphate O-acyltransferase 9                                          | 0.001374   | Year 1 & 2 TOL up vs Year 1 & 2 nTOL   |
| 218119_PM_at    | TIMM23 ///<br>TIMM23B | translocase of inner mitochondrial membrane 23 homolog (yeast) /// translocase of inner | 0.00137566 | Year 1 & 2 TOL up vs Year 1 & 2 nTOL   |
| 201400_PM_at    | PSMB3                 | proteasome (prosome, macropain) subunit, beta type, 3                                   | 0.00137653 | Year 1 & 2 TOL up vs Year 1 & 2 nTOL   |
| 228479_PM_at    | SOAT1                 | sterol O-acyltransferase 1                                                              | 0.00137665 | Year 1 & 2 TOL up vs Year 1 & 2 nTOL   |
| 243669_PM_s_at  | PRAP1                 | proline-rich acidic protein 1                                                           | 0.00139099 | Year 1 & 2 TOL up vs Year 1 & 2 nTOL   |
| 244018_PM_at    | EST11                 | EST11                                                                                   | 0.00139357 | Year 1 & 2 TOL up vs Year 1 & 2 nTOL   |
| 1554250_PM_s_at | TRIM73                | tripartite motif-containing 73                                                          | 0.0014056  | Year 1 & 2 TOL up vs Year 1 & 2 nTOL   |
| 225001_PM_at    | RAB3D                 | RAB3D, member RAS oncogene family                                                       | 0.00141527 | Year 1 & 2 TOL down vs Year 1 & 2 nTOL |
| 222750_PM_s_at  | SRD5A3                | steroid 5 alpha-reductase 3                                                             | 0.00144178 | Year 1 & 2 TOL down vs Year 1 & 2 nTOL |
| 200714_PM_x_at  | OS9                   | osteosarcoma amplified 9, endoplasmic reticulum lectin                                  | 0.00144868 | Year 1 & 2 TOL up vs Year 1 & 2 nTOL   |
| 240846_PM_at    | PCBD2                 | pterin-4 alpha-carbinolamine dehydratase/dimerization cofactor of hepatocyte nuclear fa | 0.00148018 | Year 1 & 2 TOL down vs Year 1 & 2 nTOL |
| 228912_PM_at    | VIL1                  | villin 1                                                                                | 0.00148129 | Year 1 & 2 TOL up vs Year 1 & 2 nTOL   |
| 226536_PM_at    | NSMCE2                | non-SMC element 2, MMS21 homolog (S. cerevisiae)                                        | 0.00149445 | Year 1 & 2 TOL up vs Year 1 & 2 nTOL   |
| 214928_PM_at    | OBSL1                 | obscurin-like 1                                                                         | 0.00150944 | Year 1 & 2 TOL down vs Year 1 & 2 nTOL |
| 205710_PM_at    | LRP2                  | low density lipoprotein receptor-related protein 2                                      | 0.00152531 | Year 1 & 2 TOL up vs Year 1 & 2 nTOL   |
| 202382_PM_s_at  | GNPDA1                | glucosamine-6-phosphate deaminase 1                                                     | 0.00152602 | Year 1 & 2 TOL up vs Year 1 & 2 nTOL   |

Supplementary Table 9S

|                 |                      |                                                                       |            |                                        |
|-----------------|----------------------|-----------------------------------------------------------------------|------------|----------------------------------------|
| 229608_PM_at    | C1orf183             | chromosome 1 open reading frame 183                                   | 0.0015371  | Year 1 & 2 TOL up vs Year 1 & 2 nTOL   |
| 236829_PM_at    | EST50                | EST50                                                                 | 0.00153879 | Year 1 & 2 TOL down vs Year 1 & 2 nTOL |
| 234733_PM_s_at  | FANCM                | Fanconi anemia, complementation group M                               | 0.00154143 | Year 1 & 2 TOL up vs Year 1 & 2 nTOL   |
| 211089_PM_s_at  | NEK3                 | NIMA (never in mitosis gene a)-related kinase 3                       | 0.00154256 | Year 1 & 2 TOL up vs Year 1 & 2 nTOL   |
| 239242_PM_at    | LOC100303728         | hypothetical LOC100303728                                             | 0.00154375 | Year 1 & 2 TOL down vs Year 1 & 2 nTOL |
| 213100_PM_at    | UNC5B                | unc-5 homolog B (C. elegans)                                          | 0.0015596  | Year 1 & 2 TOL up vs Year 1 & 2 nTOL   |
| 1553701_PM_a_at | DUSP18               | dual specificity phosphatase 18                                       | 0.00156368 | Year 1 & 2 TOL up vs Year 1 & 2 nTOL   |
| 1568619_PM_s_at | ITPRIPL2             | inositol 1,4,5-triphosphate receptor interacting protein-like 2       | 0.00157596 | Year 1 & 2 TOL up vs Year 1 & 2 nTOL   |
| 212681_PM_at    | EPB41L3              | erythrocyte membrane protein band 4.1-like 3                          | 0.00157847 | Year 1 & 2 TOL up vs Year 1 & 2 nTOL   |
| 215673_PM_at    | TEF                  | thyrotrophic embryonic factor                                         | 0.0015982  | Year 1 & 2 TOL down vs Year 1 & 2 nTOL |
| 203818_PM_s_at  | SF3A3                | splicing factor 3a, subunit 3, 60kDa                                  | 0.00159923 | Year 1 & 2 TOL up vs Year 1 & 2 nTOL   |
| 224293_PM_at    | TTY10                | testis-specific transcript, Y-linked 10 (non-protein coding)          | 0.00160226 | Year 1 & 2 TOL up vs Year 1 & 2 nTOL   |
| 1558561_PM_at   | HM13                 | histocompatibility (minor) 13                                         | 0.00160925 | Year 1 & 2 TOL up vs Year 1 & 2 nTOL   |
| 1561450_PM_at   | EST51                | EST51                                                                 | 0.00161577 | Year 1 & 2 TOL down vs Year 1 & 2 nTOL |
| 220119_PM_at    | EPB41L4A             | erythrocyte membrane protein band 4.1 like 4A                         | 0.00163113 | Year 1 & 2 TOL up vs Year 1 & 2 nTOL   |
| 1556508_PM_s_at | EST52                | EST52                                                                 | 0.00164185 | Year 1 & 2 TOL down vs Year 1 & 2 nTOL |
| 225923_PM_at    | VAPB                 | VAMP (vesicle-associated membrane protein)-associated protein B and C | 0.00164538 | Year 1 & 2 TOL up vs Year 1 & 2 nTOL   |
| 207768_PM_at    | EGR4                 | early growth response 4                                               | 0.00165347 | Year 1 & 2 TOL down vs Year 1 & 2 nTOL |
| 205076_PM_s_at  | MTMR11               | myotubularin related protein 11                                       | 0.00166796 | Year 1 & 2 TOL up vs Year 1 & 2 nTOL   |
| 237150_PM_at    | EST53                | EST53                                                                 | 0.0016682  | Year 1 & 2 TOL down vs Year 1 & 2 nTOL |
| 211055_PM_s_at  | INVS                 | inversin                                                              | 0.00167418 | Year 1 & 2 TOL up vs Year 1 & 2 nTOL   |
| 205816_PM_at    | ITGB8                | integrin, beta 8                                                      | 0.00168374 | Year 1 & 2 TOL up vs Year 1 & 2 nTOL   |
| 210474_PM_s_at  | CDK11A ///<br>CDK11B | cyclin-dependent kinase 11A /// cyclin-dependent kinase 11B           | 0.00168769 | Year 1 & 2 TOL up vs Year 1 & 2 nTOL   |
| 50376_PM_at     | ZNF444               | zinc finger protein 444                                               | 0.00170278 | Year 1 & 2 TOL down vs Year 1 & 2 nTOL |
| 234356_PM_at    | DKFZP434K028         | hypothetical LOC26070                                                 | 0.00172962 | Year 1 & 2 TOL up vs Year 1 & 2 nTOL   |
| 210565_PM_at    | GCGR                 | glucagon receptor                                                     | 0.00174191 | Year 1 & 2 TOL down vs Year 1 & 2 nTOL |
| 1554311_PM_a_at | SUPT6H               | suppressor of Ty 6 homolog (S. cerevisiae)                            | 0.0017609  | Year 1 & 2 TOL up vs Year 1 & 2 nTOL   |
| 208052_PM_x_at  | CEACAM3              | carcinoembryonic antigen-related cell adhesion molecule 3             | 0.00176364 | Year 1 & 2 TOL down vs Year 1 & 2 nTOL |
| 218505_PM_at    | WDR59                | WD repeat domain 59                                                   | 0.00180695 | Year 1 & 2 TOL up vs Year 1 & 2 nTOL   |
| 215190_PM_at    | EIF3M                | eukaryotic translation initiation factor 3, subunit M                 | 0.00183717 | Year 1 & 2 TOL down vs Year 1 & 2 nTOL |

Supplementary Table 9S

|                 |           |                                                                                      |            |                                        |
|-----------------|-----------|--------------------------------------------------------------------------------------|------------|----------------------------------------|
| 204895_PM_x_at  | MUC4      | mucin 4, cell surface associated                                                     | 0.00184386 | Year 1 & 2 TOL up vs Year 1 & 2 nTOL   |
| 226211_PM_at    | MEG3      | maternally expressed 3 (non-protein coding)                                          | 0.0018551  | Year 1 & 2 TOL up vs Year 1 & 2 nTOL   |
| 33778_PM_at     | TBC1D22A  | TBC1 domain family, member 22A                                                       | 0.00189263 | Year 1 & 2 TOL up vs Year 1 & 2 nTOL   |
| 223723_PM_at    | MFI2      | antigen p97 (melanoma associated) identified by monoclonal antibodies 133.2 and 96.5 | 0.00189376 | Year 1 & 2 TOL down vs Year 1 & 2 nTOL |
| 224327_PM_s_at  | DGAT2     | diacylglycerol O-acyltransferase 2                                                   | 0.00195681 | Year 1 & 2 TOL up vs Year 1 & 2 nTOL   |
| 200836_PM_s_at  | MAP4      | microtubule-associated protein 4                                                     | 0.00196386 | Year 1 & 2 TOL up vs Year 1 & 2 nTOL   |
| 219214_PM_s_at  | NT5C      | 5', 3'-nucleotidase, cytosolic                                                       | 0.00197573 | Year 1 & 2 TOL up vs Year 1 & 2 nTOL   |
| 243124_PM_at    | RRN3P2    | RNA polymerase I transcription factor homolog ( <i>S. cerevisiae</i> ) pseudogene 2  | 0.00198325 | Year 1 & 2 TOL up vs Year 1 & 2 nTOL   |
| 235280_PM_at    | EST12     | EST12                                                                                | 0.00198493 | Year 1 & 2 TOL up vs Year 1 & 2 nTOL   |
| 237553_PM_at    | LZTFL1    | leucine zipper transcription factor-like 1                                           | 0.00200863 | Year 1 & 2 TOL down vs Year 1 & 2 nTOL |
| 226899_PM_at    | UNC5B     | unc-5 homolog B ( <i>C. elegans</i> )                                                | 0.00201054 | Year 1 & 2 TOL up vs Year 1 & 2 nTOL   |
| 230863_PM_at    | LRP2      | low density lipoprotein receptor-related protein 2                                   | 0.00202239 | Year 1 & 2 TOL up vs Year 1 & 2 nTOL   |
| 1569779_PM_at   | EST54     | EST54                                                                                | 0.00202858 | Year 1 & 2 TOL down vs Year 1 & 2 nTOL |
| 1556809_PM_a_at | EST13     | EST13                                                                                | 0.00203754 | Year 1 & 2 TOL up vs Year 1 & 2 nTOL   |
| 209884_PM_s_at  | SLC4A7    | solute carrier family 4, sodium bicarbonate cotransporter, member 7                  | 0.00207084 | Year 1 & 2 TOL down vs Year 1 & 2 nTOL |
| 232350_PM_x_at  | GPR161    | G protein-coupled receptor 161                                                       | 0.00208574 | Year 1 & 2 TOL down vs Year 1 & 2 nTOL |
| 239594_PM_at    | LOC145837 | hypothetical LOC145837                                                               | 0.00208786 | Year 1 & 2 TOL up vs Year 1 & 2 nTOL   |
| 206066_PM_s_at  | RAD51C    | RAD51 homolog C ( <i>S. cerevisiae</i> )                                             | 0.00210563 | Year 1 & 2 TOL up vs Year 1 & 2 nTOL   |
| 1561455_PM_at   | LOC284294 | hypothetical LOC284294                                                               | 0.00210885 | Year 1 & 2 TOL down vs Year 1 & 2 nTOL |
| 221193_PM_s_at  | ZCCHC10   | zinc finger, CCHC domain containing 10                                               | 0.00212496 | Year 1 & 2 TOL up vs Year 1 & 2 nTOL   |
| 1563263_PM_at   | PLCG2     | Phospholipase C, gamma 2 (phosphatidylinositol-specific)                             | 0.00213111 | Year 1 & 2 TOL up vs Year 1 & 2 nTOL   |
| 203364_PM_s_at  | ATG13     | ATG13 autophagy related 13 homolog ( <i>S. cerevisiae</i> )                          | 0.00214761 | Year 1 & 2 TOL up vs Year 1 & 2 nTOL   |
| 220974_PM_x_at  | SFXN3     | sideroflexin 3                                                                       | 0.00214999 | Year 1 & 2 TOL up vs Year 1 & 2 nTOL   |
| 1561085_PM_at   | LOC153910 | hypothetical LOC153910                                                               | 0.00219102 | Year 1 & 2 TOL down vs Year 1 & 2 nTOL |
| 1553811_PM_at   | MGC14436  | hypothetical LOC84983                                                                | 0.00222019 | Year 1 & 2 TOL down vs Year 1 & 2 nTOL |
| 1553107_PM_s_at | C5orf24   | chromosome 5 open reading frame 24                                                   | 0.00223729 | Year 1 & 2 TOL up vs Year 1 & 2 nTOL   |
| 209393_PM_s_at  | EIF4E2    | eukaryotic translation initiation factor 4E family member 2                          | 0.00223798 | Year 1 & 2 TOL up vs Year 1 & 2 nTOL   |
| 1553914_PM_at   | MGC34800  | hypothetical protein MGC34800                                                        | 0.00223994 | Year 1 & 2 TOL down vs Year 1 & 2 nTOL |
| 1552792_PM_at   | SOCS4     | suppressor of cytokine signaling 4                                                   | 0.00226861 | Year 1 & 2 TOL up vs Year 1 & 2 nTOL   |
| 224992_PM_s_at  | CMIP      | c-Maf-inducing protein                                                               | 0.00228782 | Year 1 & 2 TOL up vs Year 1 & 2 nTOL   |

Supplementary Table 9S

|                 |              |                                                           |            |                                        |
|-----------------|--------------|-----------------------------------------------------------|------------|----------------------------------------|
| 221256_PM_s_at  | HDHD3        | haloacid dehalogenase-like hydrolase domain containing 3  | 0.00228967 | Year 1 & 2 TOL up vs Year 1 & 2 nTOL   |
| 213069_PM_at    | HEG1         | HEG homolog 1 (zebrafish)                                 | 0.00229408 | Year 1 & 2 TOL up vs Year 1 & 2 nTOL   |
| 200606_PM_at    | DSP          | desmoplakin                                               | 0.00230131 | Year 1 & 2 TOL up vs Year 1 & 2 nTOL   |
| 236516_PM_at    | EST14        | EST14                                                     | 0.0023119  | Year 1 & 2 TOL up vs Year 1 & 2 nTOL   |
| 244486_PM_at    | EST55        | EST55                                                     | 0.00234764 | Year 1 & 2 TOL down vs Year 1 & 2 nTOL |
| 230312_PM_at    | EST15        | EST15                                                     | 0.00235466 | Year 1 & 2 TOL up vs Year 1 & 2 nTOL   |
| 1554747_PM_a_at | 2-Sep        | septin 2                                                  | 0.00235856 | Year 1 & 2 TOL up vs Year 1 & 2 nTOL   |
| 225077_PM_at    | CHD2         | chromodomain helicase DNA binding protein 2               | 0.00237477 | Year 1 & 2 TOL up vs Year 1 & 2 nTOL   |
| 231008_PM_at    | UNC5CL       | unc-5 homolog C (C. elegans)-like                         | 0.00239479 | Year 1 & 2 TOL up vs Year 1 & 2 nTOL   |
| 224903_PM_at    | CIRH1A       | cirrhosis, autosomal recessive 1A (cirhin)                | 0.00239524 | Year 1 & 2 TOL up vs Year 1 & 2 nTOL   |
| 238030_PM_at    | ZNF268       | zinc finger protein 268                                   | 0.00240235 | Year 1 & 2 TOL down vs Year 1 & 2 nTOL |
| 229321_PM_s_at  | EST56        | EST56                                                     | 0.00244441 | Year 1 & 2 TOL down vs Year 1 & 2 nTOL |
| 219442_PM_at    | KIAA0664L3   | KIAA0664-like 3                                           | 0.00244988 | Year 1 & 2 TOL up vs Year 1 & 2 nTOL   |
| 239860_PM_at    | LOC100130232 | LP2209                                                    | 0.00250583 | Year 1 & 2 TOL up vs Year 1 & 2 nTOL   |
| 221996_PM_s_at  | CLTB         | Clathrin, light chain (Lcb)                               | 0.00251555 | Year 1 & 2 TOL down vs Year 1 & 2 nTOL |
| 219639_PM_x_at  | PARP6        | poly (ADP-ribose) polymerase family, member 6             | 0.00252406 | Year 1 & 2 TOL up vs Year 1 & 2 nTOL   |
| 205326_PM_at    | RAMP3        | receptor (G protein-coupled) activity modifying protein 3 | 0.00252896 | Year 1 & 2 TOL up vs Year 1 & 2 nTOL   |
| 222900_PM_at    | NRIP3        | nuclear receptor interacting protein 3                    | 0.00256548 | Year 1 & 2 TOL up vs Year 1 & 2 nTOL   |
| 202244_PM_at    | PSMB4        | proteasome (prosome, macropain) subunit, beta type, 4     | 0.00257101 | Year 1 & 2 TOL up vs Year 1 & 2 nTOL   |
| 229534_PM_at    | ACOT4        | acyl-CoA thioesterase 4                                   | 0.00257804 | Year 1 & 2 TOL up vs Year 1 & 2 nTOL   |
| 202507_PM_s_at  | SNAP25       | synaptosomal-associated protein, 25kDa                    | 0.00257898 | Year 1 & 2 TOL down vs Year 1 & 2 nTOL |
| 214154_PM_s_at  | PKP2         | plakophilin 2                                             | 0.00260832 | Year 1 & 2 TOL up vs Year 1 & 2 nTOL   |
| 206092_PM_x_at  | RTEL1        | regulator of telomere elongation helicase 1               | 0.00262931 | Year 1 & 2 TOL up vs Year 1 & 2 nTOL   |
| 218457_PM_s_at  | DNMT3A       | DNA (cytosine-5-)-methyltransferase 3 alpha               | 0.00263768 | Year 1 & 2 TOL up vs Year 1 & 2 nTOL   |
| 201676_PM_x_at  | PSMA1        | proteasome (prosome, macropain) subunit, alpha type, 1    | 0.00264692 | Year 1 & 2 TOL up vs Year 1 & 2 nTOL   |
| 1570014_PM_at   | EST57        | EST57                                                     | 0.00266298 | Year 1 & 2 TOL down vs Year 1 & 2 nTOL |
| 236545_PM_at    | EST16        | EST16                                                     | 0.00268014 | Year 1 & 2 TOL up vs Year 1 & 2 nTOL   |
| 220715_PM_at    | EST17        | EST17                                                     | 0.00270486 | Year 1 & 2 TOL up vs Year 1 & 2 nTOL   |
| 212155_PM_at    | RNF187       | ring finger protein 187                                   | 0.00270943 | Year 1 & 2 TOL up vs Year 1 & 2 nTOL   |
| 1570292_PM_at   | EST18        | EST18                                                     | 0.00273218 | Year 1 & 2 TOL up vs Year 1 & 2 nTOL   |
| 203979_PM_at    | CYP27A1      | cytochrome P450, family 27, subfamily A, polypeptide 1    | 0.0027481  | Year 1 & 2 TOL up vs Year 1 & 2 nTOL   |
| 239276_PM_at    | EST19        | EST19                                                     | 0.00276626 | Year 1 & 2 TOL up vs Year 1 & 2 nTOL   |

Supplementary Table 9S

|                |              |                                                                                         |            |                                        |
|----------------|--------------|-----------------------------------------------------------------------------------------|------------|----------------------------------------|
| 228900_PM_at   | SPECC1       | sperm antigen with calponin homology and coiled-coil domains 1                          | 0.0027884  | Year 1 & 2 TOL up vs Year 1 & 2 nTOL   |
| 239302_PM_s_at | LOC100506922 | hypothetical LOC100506922                                                               | 0.00278892 | Year 1 & 2 TOL up vs Year 1 & 2 nTOL   |
| 220657_PM_at   | KLHL11       | kelch-like 11 (Drosophila)                                                              | 0.00280548 | Year 1 & 2 TOL up vs Year 1 & 2 nTOL   |
| 216161_PM_at   | SBNO1        | strawberry notch homolog 1 (Drosophila)                                                 | 0.00280758 | Year 1 & 2 TOL up vs Year 1 & 2 nTOL   |
| 235774_PM_at   | LOC100422737 | hypothetical LOC100422737                                                               | 0.00281203 | Year 1 & 2 TOL up vs Year 1 & 2 nTOL   |
| 209399_PM_at   | HLCS         | holocarboxylase synthetase (biotin-(propionyl-CoA-carboxylase (ATP-hydrolysing)) ligase | 0.00284752 | Year 1 & 2 TOL down vs Year 1 & 2 nTOL |
| 238834_PM_at   | MYLK3        | myosin light chain kinase 3                                                             | 0.00286037 | Year 1 & 2 TOL up vs Year 1 & 2 nTOL   |
| 205740_PM_s_at | RBM42        | RNA binding motif protein 42                                                            | 0.00286259 | Year 1 & 2 TOL up vs Year 1 & 2 nTOL   |
| 224107_PM_at   | EST58        | EST58                                                                                   | 0.00286967 | Year 1 & 2 TOL down vs Year 1 & 2 nTOL |
| 236471_PM_at   | NFE2L3       | nuclear factor (erythroid-derived 2)-like 3                                             | 0.00291372 | Year 1 & 2 TOL down vs Year 1 & 2 nTOL |
| 1566215_PM_at  | EST59        | EST59                                                                                   | 0.00291776 | Year 1 & 2 TOL down vs Year 1 & 2 nTOL |
| 233197_PM_at   | KLHL9        | kelch-like 9 (Drosophila)                                                               | 0.00295388 | Year 1 & 2 TOL down vs Year 1 & 2 nTOL |
| 238485_PM_at   | EST20        | EST20                                                                                   | 0.00295394 | Year 1 & 2 TOL up vs Year 1 & 2 nTOL   |
| 239940_PM_at   | EST60        | EST60                                                                                   | 0.00295839 | Year 1 & 2 TOL down vs Year 1 & 2 nTOL |
| 211871_PM_x_at | GNB5         | guanine nucleotide binding protein (G protein), beta 5                                  | 0.00297625 | Year 1 & 2 TOL up vs Year 1 & 2 nTOL   |
| 234026_PM_at   | EML2         | Echinoderm microtubule associated protein like 2                                        | 0.00298744 | Year 1 & 2 TOL up vs Year 1 & 2 nTOL   |
| 235873_PM_at   | EST61        | EST61                                                                                   | 0.00301579 | Year 1 & 2 TOL down vs Year 1 & 2 nTOL |
| 215384_PM_s_at | MAP1A        | microtubule-associated protein 1A                                                       | 0.00303754 | Year 1 & 2 TOL down vs Year 1 & 2 nTOL |
| 241691_PM_at   | SCARF2       | Scavenger receptor class F, member 2                                                    | 0.00305567 | Year 1 & 2 TOL down vs Year 1 & 2 nTOL |
| 235204_PM_at   | ENTPD7       | ectonucleoside triphosphate diphosphohydrolase 7                                        | 0.00305821 | Year 1 & 2 TOL down vs Year 1 & 2 nTOL |
| 234393_PM_at   | HDAC9        | histone deacetylase 9                                                                   | 0.00309992 | Year 1 & 2 TOL down vs Year 1 & 2 nTOL |
| 220867_PM_s_at | SLC24A2      | solute carrier family 24 (sodium/potassium/calcium exchanger), member 2                 | 0.00312303 | Year 1 & 2 TOL down vs Year 1 & 2 nTOL |
| 233603_PM_at   | EST62        | EST62                                                                                   | 0.00313967 | Year 1 & 2 TOL down vs Year 1 & 2 nTOL |
| 240845_PM_at   | EST21        | EST21                                                                                   | 0.00314159 | Year 1 & 2 TOL up vs Year 1 & 2 nTOL   |
| 225825_PM_at   | C20orf194    | chromosome 20 open reading frame 194                                                    | 0.00315091 | Year 1 & 2 TOL down vs Year 1 & 2 nTOL |
| 202313_PM_at   | PPP2R2A      | protein phosphatase 2, regulatory subunit B, alpha                                      | 0.0031602  | Year 1 & 2 TOL up vs Year 1 & 2 nTOL   |
| 1552884_PM_at  | NKX6-3       | NK6 homeobox 3                                                                          | 0.00316776 | Year 1 & 2 TOL down vs Year 1 & 2 nTOL |
| 209667_PM_at   | CES2         | carboxylesterase 2                                                                      | 0.00317205 | Year 1 & 2 TOL up vs Year 1 & 2 nTOL   |
| 220100_PM_at   | SLC22A11     | solute carrier family 22 (organic anion/urate transporter), member 11                   | 0.00318528 | Year 1 & 2 TOL up vs Year 1 & 2 nTOL   |
| 233407_PM_at   | EST63        | EST63                                                                                   | 0.00318607 | Year 1 & 2 TOL down vs Year 1 & 2 nTOL |

Supplementary Table 9S

|                 |                            |                                                                                         |            |                                        |
|-----------------|----------------------------|-----------------------------------------------------------------------------------------|------------|----------------------------------------|
| 206496_PM_at    | FMO3                       | flavin containing monooxygenase 3                                                       | 0.00318986 | Year 1 & 2 TOL up vs Year 1 & 2 nTOL   |
| 201201_PM_at    | CSTB                       | cystatin B (stefin B)                                                                   | 0.0032311  | Year 1 & 2 TOL up vs Year 1 & 2 nTOL   |
| 208220_PM_x_at  | AMELY                      | amelogenin, Y-linked                                                                    | 0.00324387 | Year 1 & 2 TOL down vs Year 1 & 2 nTOL |
| 208034_PM_s_at  | PROZ                       | protein Z, vitamin K-dependent plasma glycoprotein                                      | 0.00324583 | Year 1 & 2 TOL up vs Year 1 & 2 nTOL   |
| 220192_PM_x_at  | SPDEF                      | SAM pointed domain containing ets transcription factor                                  | 0.00324758 | Year 1 & 2 TOL up vs Year 1 & 2 nTOL   |
| 230239_PM_at    | ROCK1                      | Rho-associated, coiled-coil containing protein kinase 1                                 | 0.00324994 | Year 1 & 2 TOL up vs Year 1 & 2 nTOL   |
| 206287_PM_s_at  | ITIH4 ///<br>MUSTN1        | inter-alpha (globulin) inhibitor H4 (plasma Kallikrein-sensitive glycoprotein) /// musc | 0.00325111 | Year 1 & 2 TOL up vs Year 1 & 2 nTOL   |
| 1556131_PM_s_at | FBF1                       | Fas (TNFRSF6) binding factor 1                                                          | 0.00326308 | Year 1 & 2 TOL up vs Year 1 & 2 nTOL   |
| 240052_PM_at    | ITPR1                      | inositol 1,4,5-triphosphate receptor, type 1                                            | 0.00326887 | Year 1 & 2 TOL down vs Year 1 & 2 nTOL |
| 239492_PM_at    | SEC14L4                    | SEC14-like 4 ( <i>S. cerevisiae</i> )                                                   | 0.00327576 | Year 1 & 2 TOL up vs Year 1 & 2 nTOL   |
| 52940_PM_at     | LOC100294402<br>/// SIGIRR | single Ig IL-1-related receptor-like /// single immunoglobulin and toll-interleukin 1 r | 0.00327783 | Year 1 & 2 TOL up vs Year 1 & 2 nTOL   |
| 214080_PM_x_at  | PRKCSH                     | protein kinase C substrate 80K-H                                                        | 0.0032947  | Year 1 & 2 TOL up vs Year 1 & 2 nTOL   |
| 202052_PM_s_at  | RAI14                      | retinoic acid induced 14                                                                | 0.00330028 | Year 1 & 2 TOL up vs Year 1 & 2 nTOL   |
| 213695_PM_at    | PON3                       | paraoxonase 3                                                                           | 0.00330079 | Year 1 & 2 TOL up vs Year 1 & 2 nTOL   |
| 206709_PM_x_at  | GPT                        | glutamic-pyruvate transaminase (alanine aminotransferase)                               | 0.00330969 | Year 1 & 2 TOL up vs Year 1 & 2 nTOL   |
| 236958_PM_at    | EST22                      | EST22                                                                                   | 0.00331128 | Year 1 & 2 TOL up vs Year 1 & 2 nTOL   |
| 1558522_PM_at   | EST23                      | EST23                                                                                   | 0.00331322 | Year 1 & 2 TOL up vs Year 1 & 2 nTOL   |
| 213649_PM_at    | SRSF7                      | serine/arginine-rich splicing factor 7                                                  | 0.0033427  | Year 1 & 2 TOL up vs Year 1 & 2 nTOL   |
| 221613_PM_s_at  | ZFAND6                     | zinc finger, AN1-type domain 6                                                          | 0.00336452 | Year 1 & 2 TOL up vs Year 1 & 2 nTOL   |
| 226318_PM_at    | TBRG1                      | transforming growth factor beta regulator 1                                             | 0.0033818  | Year 1 & 2 TOL up vs Year 1 & 2 nTOL   |
| 201233_PM_at    | PSMD13                     | proteasome (prosome, macropain) 26S subunit, non-ATPase, 13                             | 0.00338345 | Year 1 & 2 TOL up vs Year 1 & 2 nTOL   |
| 238722_PM_x_at  | NAPEPLD                    | N-acyl phosphatidylethanolamine phospholipase D                                         | 0.0033886  | Year 1 & 2 TOL up vs Year 1 & 2 nTOL   |
| 228391_PM_at    | CYP4V2                     | cytochrome P450, family 4, subfamily V, polypeptide 2                                   | 0.0033905  | Year 1 & 2 TOL up vs Year 1 & 2 nTOL   |
| 1559134_PM_a_at | EST64                      | EST64                                                                                   | 0.0034104  | Year 1 & 2 TOL down vs Year 1 & 2 nTOL |
| 1557879_PM_at   | LOC100129175               | hypothetical protein LOC100129175                                                       | 0.0034353  | Year 1 & 2 TOL up vs Year 1 & 2 nTOL   |
| 1555827_PM_at   | CCNL1                      | Cyclin L1                                                                               | 0.00345117 | Year 1 & 2 TOL down vs Year 1 & 2 nTOL |
| 204458_PM_at    | PLA2G15                    | phospholipase A2, group XV                                                              | 0.00345247 | Year 1 & 2 TOL up vs Year 1 & 2 nTOL   |
| 1557866_PM_at   | C9orf117                   | chromosome 9 open reading frame 117                                                     | 0.00346124 | Year 1 & 2 TOL up vs Year 1 & 2 nTOL   |
| 208708_PM_x_at  | EIF5                       | eukaryotic translation initiation factor 5                                              | 0.00346251 | Year 1 & 2 TOL up vs Year 1 & 2 nTOL   |
| 219424_PM_at    | EBI3                       | Epstein-Barr virus induced 3                                                            | 0.00346702 | Year 1 & 2 TOL up vs Year 1 & 2 nTOL   |

Supplementary Table 9S

|                 |           |                                                                                         |            |                                        |
|-----------------|-----------|-----------------------------------------------------------------------------------------|------------|----------------------------------------|
| 204106_PM_at    | TESK1     | testis-specific kinase 1                                                                | 0.00347243 | Year 1 & 2 TOL up vs Year 1 & 2 nTOL   |
| 229241_PM_at    | LDHD      | lactate dehydrogenase D                                                                 | 0.00349349 | Year 1 & 2 TOL up vs Year 1 & 2 nTOL   |
| 217527_PM_s_at  | NFATC2IP  | nuclear factor of activated T-cells, cytoplasmic, calcineurin-dependent 2 interacting p | 0.00350053 | Year 1 & 2 TOL up vs Year 1 & 2 nTOL   |
| 241396_PM_at    | NEDD4L    | neural precursor cell expressed, developmentally down-regulated 4-like                  | 0.00352365 | Year 1 & 2 TOL up vs Year 1 & 2 nTOL   |
| 216985_PM_s_at  | STX3      | syntaxin 3                                                                              | 0.00353648 | Year 1 & 2 TOL up vs Year 1 & 2 nTOL   |
| 224181_PM_at    | C18orf2   | chromosome 18 open reading frame 2                                                      | 0.00355255 | Year 1 & 2 TOL down vs Year 1 & 2 nTOL |
| 229567_PM_at    | FITM1     | fat storage-inducing transmembrane protein 1                                            | 0.00355738 | Year 1 & 2 TOL down vs Year 1 & 2 nTOL |
| 202397_PM_at    | NUTF2     | nuclear transport factor 2                                                              | 0.00356312 | Year 1 & 2 TOL up vs Year 1 & 2 nTOL   |
| 237798_PM_at    | EST24     | EST24                                                                                   | 0.00356866 | Year 1 & 2 TOL up vs Year 1 & 2 nTOL   |
| 208680_PM_at    | PRDX1     | peroxiredoxin 1                                                                         | 0.00358856 | Year 1 & 2 TOL up vs Year 1 & 2 nTOL   |
| 243200_PM_at    | EST25     | EST25                                                                                   | 0.00359117 | Year 1 & 2 TOL up vs Year 1 & 2 nTOL   |
| 235971_PM_at    | EST65     | EST65                                                                                   | 0.00359165 | Year 1 & 2 TOL down vs Year 1 & 2 nTOL |
| 207131_PM_x_at  | GGT1      | gamma-glutamyltransferase 1                                                             | 0.00365208 | Year 1 & 2 TOL up vs Year 1 & 2 nTOL   |
| 221181_PM_at    | EST26     | EST26                                                                                   | 0.00365481 | Year 1 & 2 TOL up vs Year 1 & 2 nTOL   |
| 1552493_PM_s_at | CYP11B1   | cytochrome P450, family 11, subfamily B, polypeptide 1                                  | 0.00365982 | Year 1 & 2 TOL up vs Year 1 & 2 nTOL   |
| 233198_PM_at    | GOLGA2B   | golgin A2 family, member B                                                              | 0.00366258 | Year 1 & 2 TOL up vs Year 1 & 2 nTOL   |
| 218847_PM_at    | IGF2BP2   | insulin-like growth factor 2 mRNA binding protein 2                                     | 0.003665   | Year 1 & 2 TOL up vs Year 1 & 2 nTOL   |
| 215366_PM_at    | SNX13     | sorting nexin 13                                                                        | 0.00367119 | Year 1 & 2 TOL down vs Year 1 & 2 nTOL |
| 200617_PM_at    | MLEC      | malectin                                                                                | 0.00367585 | Year 1 & 2 TOL up vs Year 1 & 2 nTOL   |
| 1564333_PM_a_at | PSAPL1    | prosaposin-like 1 (gene/pseudogene)                                                     | 0.00367627 | Year 1 & 2 TOL down vs Year 1 & 2 nTOL |
| 231544_PM_s_at  | POLR3G    | Polymerase (RNA) III (DNA directed) polypeptide G (32kD)                                | 0.00367651 | Year 1 & 2 TOL down vs Year 1 & 2 nTOL |
| 214832_PM_at    | HNF4A     | hepatocyte nuclear factor 4, alpha                                                      | 0.00369829 | Year 1 & 2 TOL up vs Year 1 & 2 nTOL   |
| 204970_PM_s_at  | MAFG      | v-maf musculoaponeurotic fibrosarcoma oncogene homolog G (avian)                        | 0.00370231 | Year 1 & 2 TOL up vs Year 1 & 2 nTOL   |
| 228295_PM_at    | WDR59     | WD repeat domain 59                                                                     | 0.00370884 | Year 1 & 2 TOL up vs Year 1 & 2 nTOL   |
| 209875_PM_s_at  | SPP1      | secreted phosphoprotein 1                                                               | 0.00371611 | Year 1 & 2 TOL up vs Year 1 & 2 nTOL   |
| 203433_PM_at    | MTHFS     | 5,10-methenyltetrahydrofolate synthetase (5-formyltetrahydrofolate cyclo-ligase)        | 0.00371882 | Year 1 & 2 TOL up vs Year 1 & 2 nTOL   |
| 227962_PM_at    | ACOX1     | acyl-CoA oxidase 1, palmitoyl                                                           | 0.00371972 | Year 1 & 2 TOL up vs Year 1 & 2 nTOL   |
| 236651_PM_at    | KALRN     | kalirin, RhoGEF kinase                                                                  | 0.00372075 | Year 1 & 2 TOL up vs Year 1 & 2 nTOL   |
| 211119_PM_at    | ESR2      | estrogen receptor 2 (ER beta)                                                           | 0.00375497 | Year 1 & 2 TOL down vs Year 1 & 2 nTOL |
| 1563009_PM_at   | LOC284930 | Hypothetical protein LOC284930                                                          | 0.00377058 | Year 1 & 2 TOL up vs Year 1 & 2 nTOL   |

Supplementary Table 9S

|                 |              |                                                                        |            |                                        |
|-----------------|--------------|------------------------------------------------------------------------|------------|----------------------------------------|
| 234228_PM_at    | EST66        | EST66                                                                  | 0.00382554 | Year 1 & 2 TOL down vs Year 1 & 2 nTOL |
| 205082_PM_s_at  | AOX1         | aldehyde oxidase 1                                                     | 0.00383734 | Year 1 & 2 TOL up vs Year 1 & 2 nTOL   |
| 204981_PM_at    | SLC22A18     | solute carrier family 22, member 18                                    | 0.00386069 | Year 1 & 2 TOL up vs Year 1 & 2 nTOL   |
| 215255_PM_at    | IGSF9B       | immunoglobulin superfamily, member 9B                                  | 0.00386658 | Year 1 & 2 TOL down vs Year 1 & 2 nTOL |
| 235326_PM_at    | EST27        | EST27                                                                  | 0.00390513 | Year 1 & 2 TOL up vs Year 1 & 2 nTOL   |
| 206102_PM_at    | GIN51        | GIN5 complex subunit 1 (Psf1 homolog)                                  | 0.00390538 | Year 1 & 2 TOL down vs Year 1 & 2 nTOL |
| 224232_PM_s_at  | PRELID1      | PRELI domain containing 1                                              | 0.00392309 | Year 1 & 2 TOL up vs Year 1 & 2 nTOL   |
| 243961_PM_at    | EST67        | EST67                                                                  | 0.00392503 | Year 1 & 2 TOL down vs Year 1 & 2 nTOL |
| 204622_PM_x_at  | NR4A2        | nuclear receptor subfamily 4, group A, member 2                        | 0.00393115 | Year 1 & 2 TOL up vs Year 1 & 2 nTOL   |
| 231782_PM_s_at  | KLK4         | kallikrein-related peptidase 4                                         | 0.00396928 | Year 1 & 2 TOL up vs Year 1 & 2 nTOL   |
| 211983_PM_x_at  | ACTG1        | actin, gamma 1                                                         | 0.003984   | Year 1 & 2 TOL up vs Year 1 & 2 nTOL   |
| 211717_PM_at    | ANKRD40      | ankyrin repeat domain 40                                               | 0.00401368 | Year 1 & 2 TOL up vs Year 1 & 2 nTOL   |
| 204020_PM_at    | PURA         | purine-rich element binding protein A                                  | 0.00403596 | Year 1 & 2 TOL up vs Year 1 & 2 nTOL   |
| 1570409_PM_x_at | EST28        | EST28                                                                  | 0.00403738 | Year 1 & 2 TOL up vs Year 1 & 2 nTOL   |
| 213314_PM_at    | C6orf162     | chromosome 6 open reading frame 162                                    | 0.00404059 | Year 1 & 2 TOL down vs Year 1 & 2 nTOL |
| 205455_PM_at    | MST1R        | macrophage stimulating 1 receptor (c-met-related tyrosine kinase)      | 0.0040499  | Year 1 & 2 TOL down vs Year 1 & 2 nTOL |
| 223623_PM_at    | C2orf40      | chromosome 2 open reading frame 40                                     | 0.00405875 | Year 1 & 2 TOL up vs Year 1 & 2 nTOL   |
| 1569609_PM_at   | EST68        | EST68                                                                  | 0.00407173 | Year 1 & 2 TOL down vs Year 1 & 2 nTOL |
| 215155_PM_at    | HEXA         | Hexosaminidase A (alpha polypeptide)                                   | 0.00408467 | Year 1 & 2 TOL up vs Year 1 & 2 nTOL   |
| 215960_PM_at    | SLC5A4       | solute carrier family 5 (low affinity glucose cotransporter), member 4 | 0.00408836 | Year 1 & 2 TOL down vs Year 1 & 2 nTOL |
| 200663_PM_at    | CD63         | CD63 molecule                                                          | 0.00409939 | Year 1 & 2 TOL up vs Year 1 & 2 nTOL   |
| 232203_PM_at    | EST69        | EST69                                                                  | 0.00410659 | Year 1 & 2 TOL down vs Year 1 & 2 nTOL |
| 217720_PM_at    | CHCHD2       | coiled-coil-helix-coiled-coil-helix domain containing 2                | 0.00410707 | Year 1 & 2 TOL up vs Year 1 & 2 nTOL   |
| 223509_PM_at    | CLDN2        | claudin 2                                                              | 0.00415727 | Year 1 & 2 TOL up vs Year 1 & 2 nTOL   |
| 240211_PM_at    | LOC100130468 | hypothetical protein LOC100130468                                      | 0.00416463 | Year 1 & 2 TOL up vs Year 1 & 2 nTOL   |
| 207593_PM_at    | ABCG4        | ATP-binding cassette, sub-family G (WHITE), member 4                   | 0.00418213 | Year 1 & 2 TOL up vs Year 1 & 2 nTOL   |
| 221675_PM_s_at  | CHPT1        | choline phosphotransferase 1                                           | 0.00419774 | Year 1 & 2 TOL up vs Year 1 & 2 nTOL   |
| 235607_PM_at    | EST70        | EST70                                                                  | 0.00420179 | Year 1 & 2 TOL down vs Year 1 & 2 nTOL |
| 211631_PM_x_at  | B4GALT1      | UDP-Gal:betaGlcNAc beta 1,4- galactosyltransferase, polypeptide 1      | 0.00420723 | Year 1 & 2 TOL up vs Year 1 & 2 nTOL   |
| 212405_PM_s_at  | METTL13      | methyltransferase like 13                                              | 0.00420754 | Year 1 & 2 TOL up vs Year 1 & 2 nTOL   |
| 1556568_PM_a_at | EST29        | EST29                                                                  | 0.00422423 | Year 1 & 2 TOL up vs Year 1 & 2 nTOL   |



Supplementary Table 9S

|                 |              |                                                                                 |            |                                        |
|-----------------|--------------|---------------------------------------------------------------------------------|------------|----------------------------------------|
| 228635_PM_at    | PCDH10       | protocadherin 10                                                                | 0.00424124 | Year 1 & 2 TOL up vs Year 1 & 2 nTOL   |
| 219575_PM_s_at  | COG8 /// PDF | component of oligomeric golgi complex 8 /// peptide deformylase (mitochondrial) | 0.00424152 | Year 1 & 2 TOL up vs Year 1 & 2 nTOL   |
| 213826_PM_s_at  | EST71        | EST71                                                                           | 0.00424445 | Year 1 & 2 TOL down vs Year 1 & 2 nTOL |
| 240666_PM_at    | EST30        | EST30                                                                           | 0.00424461 | Year 1 & 2 TOL up vs Year 1 & 2 nTOL   |
| 224814_PM_at    | DPP7         | dipeptidyl-peptidase 7                                                          | 0.00424795 | Year 1 & 2 TOL up vs Year 1 & 2 nTOL   |
| 1559034_PM_at   | SIRPB2       | signal-regulatory protein beta 2                                                | 0.00425627 | Year 1 & 2 TOL up vs Year 1 & 2 nTOL   |
| 224209_PM_s_at  | GDA          | guanine deaminase                                                               | 0.00426225 | Year 1 & 2 TOL up vs Year 1 & 2 nTOL   |
| 207672_PM_at    | EST72        | EST72                                                                           | 0.00428931 | Year 1 & 2 TOL down vs Year 1 & 2 nTOL |
| 217282_PM_at    | MAN1A2       | mannosidase, alpha, class 1A, member 2                                          | 0.00429463 | Year 1 & 2 TOL down vs Year 1 & 2 nTOL |
| 201106_PM_at    | GPX4         | glutathione peroxidase 4 (phospholipid hydroperoxidase)                         | 0.00432    | Year 1 & 2 TOL up vs Year 1 & 2 nTOL   |
| 1555989_PM_at   | EST31        | EST31                                                                           | 0.00432781 | Year 1 & 2 TOL up vs Year 1 & 2 nTOL   |
| 204264_PM_at    | CPT2         | carnitine palmitoyltransferase 2                                                | 0.00432798 | Year 1 & 2 TOL up vs Year 1 & 2 nTOL   |
| 228823_PM_at    | POLR2J2      | polymerase (RNA) II (DNA directed) polypeptide J2                               | 0.00432975 | Year 1 & 2 TOL up vs Year 1 & 2 nTOL   |
| 214423_PM_x_at  | ALDOB        | Aldolase B, fructose-bisphosphate                                               | 0.00434112 | Year 1 & 2 TOL up vs Year 1 & 2 nTOL   |
| 1562443_PM_at   | CLVS2        | clavesin 2                                                                      | 0.00434115 | Year 1 & 2 TOL up vs Year 1 & 2 nTOL   |
| 243781_PM_at    | EST32        | EST32                                                                           | 0.00435813 | Year 1 & 2 TOL up vs Year 1 & 2 nTOL   |
| 201894_PM_s_at  | SSR1         | signal sequence receptor, alpha                                                 | 0.00438517 | Year 1 & 2 TOL up vs Year 1 & 2 nTOL   |
| 214475_PM_x_at  | CAPN3        | calpain 3, (p94)                                                                | 0.00438834 | Year 1 & 2 TOL up vs Year 1 & 2 nTOL   |
| 1566680_PM_at   | EST33        | EST33                                                                           | 0.00443373 | Year 1 & 2 TOL up vs Year 1 & 2 nTOL   |
| 207858_PM_s_at  | PKLR         | pyruvate kinase, liver and RBC                                                  | 0.0044341  | Year 1 & 2 TOL up vs Year 1 & 2 nTOL   |
| 1556096_PM_s_at | UNC13C       | unc-13 homolog C (C. elegans)                                                   | 0.00444295 | Year 1 & 2 TOL down vs Year 1 & 2 nTOL |
| 201639_PM_s_at  | CPSF1        | cleavage and polyadenylation specific factor 1, 160kDa                          | 0.00446419 | Year 1 & 2 TOL up vs Year 1 & 2 nTOL   |
| 218510_PM_x_at  | FAM134B      | family with sequence similarity 134, member B                                   | 0.00447801 | Year 1 & 2 TOL up vs Year 1 & 2 nTOL   |
| 209605_PM_at    | TST          | thiosulfate sulfurtransferase (rhodanese)                                       | 0.00450448 | Year 1 & 2 TOL up vs Year 1 & 2 nTOL   |
| 208911_PM_s_at  | PDHB         | pyruvate dehydrogenase (lipoamide) beta                                         | 0.0045129  | Year 1 & 2 TOL up vs Year 1 & 2 nTOL   |
| 235487_PM_at    | LOC100506701 | hypothetical LOC100506701                                                       | 0.00452095 | Year 1 & 2 TOL up vs Year 1 & 2 nTOL   |
| 206739_PM_at    | HOXC5        | homeobox C5                                                                     | 0.00452343 | Year 1 & 2 TOL up vs Year 1 & 2 nTOL   |
| 1560846_PM_at   | EST34        | EST34                                                                           | 0.0045256  | Year 1 & 2 TOL up vs Year 1 & 2 nTOL   |
| 224725_PM_at    | MIB1         | mindbomb homolog 1 (Drosophila)                                                 | 0.00453677 | Year 1 & 2 TOL up vs Year 1 & 2 nTOL   |
| 201805_PM_at    | PRKAG1       | protein kinase, AMP-activated, gamma 1 non-catalytic subunit                    | 0.00456613 | Year 1 & 2 TOL up vs Year 1 & 2 nTOL   |
| 229042_PM_s_at  | DYNC1H1      | dynein, cytoplasmic 1, heavy chain 1                                            | 0.00456864 | Year 1 & 2 TOL up vs Year 1 & 2 nTOL   |
| 1558608_PM_a_at | PAPPA        | pregnancy-associated plasma protein A, pappalysin 1                             | 0.00457164 | Year 1 & 2 TOL up vs Year 1 & 2 nTOL   |

Supplementary Table 9S

|                 |                |                                                                                          |            |                                        |
|-----------------|----------------|------------------------------------------------------------------------------------------|------------|----------------------------------------|
| 237156_PM_at    | EST73          | EST73                                                                                    | 0.00458361 | Year 1 & 2 TOL down vs Year 1 & 2 nTOL |
| 225989_PM_at    | HERC4          | hect domain and RLD 4                                                                    | 0.00458536 | Year 1 & 2 TOL up vs Year 1 & 2 nTOL   |
| 202432_PM_at    | PPP3CB         | protein phosphatase 3, catalytic subunit, beta isozyme                                   | 0.00458873 | Year 1 & 2 TOL up vs Year 1 & 2 nTOL   |
| 224920_PM_x_at  | MYADM          | myeloid-associated differentiation marker                                                | 0.00459688 | Year 1 & 2 TOL up vs Year 1 & 2 nTOL   |
| 237396_PM_at    | EST35          | EST35                                                                                    | 0.00459995 | Year 1 & 2 TOL up vs Year 1 & 2 nTOL   |
| 237571_PM_at    | EST74          | EST74                                                                                    | 0.00462819 | Year 1 & 2 TOL down vs Year 1 & 2 nTOL |
| 234266_PM_at    | EST36          | EST36                                                                                    | 0.00464735 | Year 1 & 2 TOL up vs Year 1 & 2 nTOL   |
| 1557189_PM_at   | DNASE1         | deoxyribonuclease I                                                                      | 0.00465611 | Year 1 & 2 TOL down vs Year 1 & 2 nTOL |
| 236025_PM_at    | NCOR2          | nuclear receptor corepressor 2                                                           | 0.0047071  | Year 1 & 2 TOL down vs Year 1 & 2 nTOL |
| 237620_PM_at    | ODF3L2         | outer dense fiber of sperm tails 3-like 2                                                | 0.00472631 | Year 1 & 2 TOL down vs Year 1 & 2 nTOL |
| 221047_PM_s_at  | MARK1          | MAP/microtubule affinity-regulating kinase 1                                             | 0.00477089 | Year 1 & 2 TOL up vs Year 1 & 2 nTOL   |
| 236294_PM_at    | HUWE1          | HECT, UBA and WWE domain containing 1                                                    | 0.00477946 | Year 1 & 2 TOL down vs Year 1 & 2 nTOL |
| 218002_PM_s_at  | CXCL14         | chemokine (C-X-C motif) ligand 14                                                        | 0.00479114 | Year 1 & 2 TOL up vs Year 1 & 2 nTOL   |
| 236416_PM_at    | ARHGEF7        | Rho guanine nucleotide exchange factor (GEF) 7                                           | 0.00482108 | Year 1 & 2 TOL up vs Year 1 & 2 nTOL   |
| 204555_PM_s_at  | PPP1R3D        | protein phosphatase 1, regulatory (inhibitor) subunit 3D                                 | 0.00484097 | Year 1 & 2 TOL up vs Year 1 & 2 nTOL   |
| 236598_PM_at    | EST37          | EST37                                                                                    | 0.00487855 | Year 1 & 2 TOL up vs Year 1 & 2 nTOL   |
| 205307_PM_s_at  | KMO            | kynurenine 3-monooxygenase (kynurenine 3-hydroxylase)                                    | 0.00489271 | Year 1 & 2 TOL up vs Year 1 & 2 nTOL   |
| 218112_PM_at    | MRPS34         | mitochondrial ribosomal protein S34                                                      | 0.00491629 | Year 1 & 2 TOL up vs Year 1 & 2 nTOL   |
| 236080_PM_at    | LOC100507670   | hypothetical LOC100507670                                                                | 0.00494748 | Year 1 & 2 TOL up vs Year 1 & 2 nTOL   |
| 1555203_PM_s_at | SLC44A4        | solute carrier family 44, member 4                                                       | 0.00495487 | Year 1 & 2 TOL up vs Year 1 & 2 nTOL   |
| 230830_PM_at    | OSTBETA        | organic solute transporter beta                                                          | 0.00496926 | Year 1 & 2 TOL up vs Year 1 & 2 nTOL   |
| 225494_PM_at    | EST38          | EST38                                                                                    | 0.00497259 | Year 1 & 2 TOL up vs Year 1 & 2 nTOL   |
| 206963_PM_s_at  | NAT8 /// NAT8B | N-acetyltransferase 8 (GCN5-related, putative) /// N-acetyltransferase 8B (GCN5-related) | 0.00498266 | Year 1 & 2 TOL up vs Year 1 & 2 nTOL   |
| 1553319_PM_at   | OXGR1          | oxoglutarate (alpha-ketoglutarate) receptor 1                                            | 0.00498266 | Year 1 & 2 TOL down vs Year 1 & 2 nTOL |
| 216147_PM_at    | EST75          | EST75                                                                                    | 0.00499435 | Year 1 & 2 TOL down vs Year 1 & 2 nTOL |
| 211196_PM_at    | DBT            | dihydrolipoamide branched chain transacylase E2                                          | 0.00499702 | Year 1 & 2 TOL up vs Year 1 & 2 nTOL   |
